# Supplementary material for: LncRNAs down-regulate Myh1, Casr, and Mis18a expression in the Substantia Nigra of aged male rats
Source: Aging (Albany NY). 2019 Oct 2;11(19):8313–28. doi: 10.18632/aging.102321 (PMC6814601; doi:10.18632/aging.102321)
Supplement: Supplementary Table 1 [file aging-11-102321-s011.xlsx]

## Sheet: Table 1
gene id	gene name	description	locus	1_FPKM	2_FPKM	3_FPKM	4_FPKM	5_FPKM	6_FPKM	6Mon	24Mon	log2FC	Pvalue	Qvalue	updown
ENSRNOG00000047706	RT1-CE16	RT1 class I, locus CE16 [Source:RGD Symbol;Acc:1359403]	20:3791407-3794027	0	3.83867	0	0	0	0	1.27956	0	#NAME?	2.95e-06	0.000561801	DOWN
ENSRNOG00000050134	AABR07042599.1	Uncharacterized protein [Source:UniProtKB/TrEMBL;Acc:M0R5B3]	19:209926-214130	0.601715	1.14199	0.8174	0	0	0	0.853702	0	#NAME?	5.27e-06	0.000905701	DOWN
ENSRNOG00000001865	Serpind1	serpin peptidase inhibitor, clade D (heparin cofactor), member 1 [Source:RGD Symbol;Acc:619854]	11:87913806-87924816	0.127305	0.295293	0.0494071	0	0	0	0.157335	0	#NAME?	0.000179572	0.0137644	DOWN
ENSRNOG00000037167	Rtp3	receptor (chemosensory) transporter protein 3 [Source:RGD Symbol;Acc:1310546]	8:119260618-119265157	0	0	0	0.0853451	0.249692	0.218997	0	0.184678	Inf	0.000421815	0.0256671	UP
ENSRNOG00000020400	Mef2b	myocyte enhancer factor 2B [Source:RGD Symbol;Acc:1561733]	16:21001206-21017163	0	0	0.0577893	0.25396	0.297202	0.651664	0.0192631	0.400942	4.37948	0.000155354	0.01254	UP
ENSRNOG00000050325	Emr4	EGF-like module containing, mucin-like, hormone receptor-like sequence 4 [Source:RGD Symbol;Acc:1359641]	9:8054466-8198800	0.0259277	0	0	0.0553147	0.226566	0.227107	0.00864257	0.169663	4.29506	0.000350847	0.0222383	UP
ENSRNOG00000054834	AABR07001734.1	-	1:55707398-55754357	0.104205	0.109894	0.134834	2.03762	2.29819	2.1677	0.116311	2.16783	4.22019	2.08e-32	2.05e-28	UP
ENSRNOG00000002776	Sell	selectin L [Source:RGD Symbol;Acc:3655]	13:82369493-82387631	0	0.0468964	0	0.189677	0.332961	0.243357	0.0156321	0.255332	4.02979	0.000444986	0.0266668	UP
ENSRNOG00000002031	Naa11	N(alpha)-acetyltransferase 11, NatA catalytic subunit [Source:RGD Symbol;Acc:1564723]	14:13827636-13837671	0	0.0511553	0	0.155229	0.18169	0.159338	0.0170518	0.165419	3.27813	0.000379161	0.0234868	UP
ENSRNOG00000042220	Vsx1	visual system homeobox 1 [Source:RGD Symbol;Acc:1305667]	3:146484238-146491837	0.027835	0.0586995	0.0270259	0.237505	0.13899	0.639975	0.0378534	0.338823	3.16204	0.000118666	0.0103381	UP
ENSRNOG00000007664	Tnfrsf13c	tumor necrosis factor receptor superfamily, member 13c [Source:RGD Symbol;Acc:1560810]	7:123453788-123456268	0	0.142175	0.0436321	0.479314	0.336591	0.393626	0.0619359	0.403177	2.70257	0.000238849	0.0169909	UP
ENSRNOG00000032246	Acsm3	acyl-CoA synthetase medium-chain family member 3 [Source:RGD Symbol;Acc:62086]	1:189514553-189541224	0.27594	0.129332	0.0297655	1.53678	1.03333	0.167826	0.145013	0.912645	2.65388	0.000265677	0.0183708	UP
ENSRNOG00000000451	RT1-Ba	RT1 class II, locus Ba [Source:RGD Symbol;Acc:1595867]	20:4066132-4070721	0.75947	0.480488	0.294766	5.7099	2.60687	1.24706	0.511575	3.18794	2.63961	1.3e-07	3.79e-05	UP
ENSRNOG00000018735	Cd74	Cd74 molecule, major histocompatibility complex, class II invariant chain [Source:RGD Symbol;Acc:2313]	18:56071478-56080849	10.7524	6.92546	8.53203	79.137	44.2297	21.5119	8.73663	48.2929	2.46666	7.91e-14	1.12e-10	UP
ENSRNOG00000013973	Lcn2	lipocalin 2 [Source:RGD Symbol;Acc:69408]	3:11414186-11417546	0.264323	0	0.342015	1.59756	0.879906	0.868163	0.202112	1.11521	2.46409	5.18e-05	0.00559856	UP
ENSRNOG00000033215	RT1-Db1	RT1 class II, locus Db1 [Source:RGD Symbol;Acc:1593282]	20:4087618-4097190	0.268157	0.231348	0.165591	1.65084	1.01934	0.533729	0.221698	1.06797	2.2682	4.36e-09	1.92e-06	UP
ENSRNOG00000032844	RT1-Da	RT1 class II, locus Da [Source:RGD Symbol;Acc:1593283]	20:4127644-4132616	2.23204	1.72208	1.95457	15.2978	8.1881	3.54591	1.96956	9.01061	2.19375	2.58e-09	1.24e-06	UP
ENSRNOG00000023465	LOC500300	similar to hypothetical protein MGC6835 [Source:RGD Symbol;Acc:1565700]	4:148782479-148784562	0.123838	0.26122	0.240357	0.858514	0.618369	1.01691	0.208472	0.831263	1.99545	0.000113847	0.0100961	UP
ENSRNOG00000002459	Fbxo40	F-box protein 40 [Source:RGD Symbol;Acc:1309781]	11:66713888-66731198	0.0826241	0.203325	0.10691	0.381864	0.756382	0.392013	0.130953	0.510086	1.96169	7.68e-05	0.00741265	UP
ENSRNOG00000011809	Rpgrip1	retinitis pigmentosa GTPase regulator interacting protein 1 [Source:RGD Symbol;Acc:1310807]	15:28522737-28574737	0.0692813	0.0584442	0.0537763	0.147762	0.259408	0.242677	0.0605006	0.216615	1.84012	0.000182802	0.013851	UP
ENSRNOG00000012843	Aspg	asparaginase [Source:RGD Symbol;Acc:708388]	6:136682126-136701628	0.148828	0.408009	0.144416	0.73004	0.965945	0.781984	0.233751	0.82599	1.82115	1.8e-06	0.000379706	UP
ENSRNOG00000046834	C3	complement component 3 [Source:RGD Symbol;Acc:2232]	9:9721105-9747167	19.0118	11.1436	11.441	50.9907	44.3579	48.6025	13.8655	47.9837	1.79105	9.43e-29	6.22e-25	UP
ENSRNOG00000005807	Ptpn7	protein tyrosine phosphatase, non-receptor type 7 [Source:RGD Symbol;Acc:708516]	13:51958834-51972777	0.106513	0.131034	0.120582	0.265029	0.731208	0.233195	0.119377	0.409811	1.77944	0.000624833	0.033947	UP
ENSRNOG00000011659	Alpk3	alpha-kinase 3 [Source:RGD Symbol;Acc:1309860]	1:142883040-142931940	0.557787	0.588161	0.481117	1.89029	1.88755	1.73687	0.542355	1.83824	1.76101	5.7e-23	1.88e-19	UP
ENSRNOG00000046683	RGD1566307	similar to PIRB1 [Source:RGD Symbol;Acc:1566307]	1:73610149-73619356	0.550755	0.239146	0.220069	1.76207	0.485258	1.17038	0.336657	1.13924	1.75872	0.000211675	0.0156197	UP
ENSRNOG00000020501	Tjp3	tight junction protein 3 [Source:RGD Symbol;Acc:1309247]	7:11295892-11315615	0.0495222	0.104452	0.112145	0.440162	0.206069	0.253023	0.0887063	0.299751	1.75666	0.000231458	0.0166448	UP
ENSRNOG00000053332	Cdh26	cadherin-like 26 [Source:MGI Symbol;Acc:MGI:2685856]	3:173969273-174019766	0.479765	0.325212	0.232777	1.206	0.983784	1.23796	0.345918	1.14258	1.72379	2.87e-07	7.29e-05	UP
ENSRNOG00000012184	Urgcp	upregulator of cell proliferation [Source:RGD Symbol;Acc:1564681]	14:85957716-85991211	1.49129	1.21132	1.75174	5.7831	3.76734	3.63995	1.48478	4.3968	1.5662	1.05e-18	2.31e-15	UP
ENSRNOG00000026989	Gapt	Grb2-binding adaptor protein, transmembrane [Source:RGD Symbol;Acc:1586621]	2:41869556-41871858	0.289226	0.348525	0.160364	0.925339	0.876715	0.54277	0.266038	0.781608	1.55481	0.00034186	0.0218085	UP
ENSRNOG00000015368	Pdilt	protein disulfide isomerase-like, testis expressed [Source:RGD Symbol;Acc:1307822]	1:189207165-189238776	0.257572	0.232796	0.142814	0.470902	0.826694	0.523666	0.211061	0.607087	1.52424	0.00096581	0.0451533	UP
ENSRNOG00000016294	Cd4	Cd4 molecule [Source:RGD Symbol;Acc:2306]	4:157383052-157408176	9.18207	7.36767	5.34599	22.3545	22.0833	18.0439	7.29858	20.8273	1.51279	9.37e-20	2.32e-16	UP
ENSRNOG00000015860	Gipr	gastric inhibitory polypeptide receptor [Source:RGD Symbol;Acc:2689]	1:80063049-80073223	4.14751	3.21116	4.05274	10.5782	9.4125	11.6206	3.8038	10.5371	1.46996	1.3e-25	6.41e-22	UP
ENSRNOG00000003537	Spta1	spectrin, alpha, erythrocytic 1 [Source:RGD Symbol;Acc:1305194]	13:92264231-92340083	0.363678	0.445661	0.314747	0.922436	0.981501	1.08677	0.374695	0.996901	1.41173	4.79e-12	4.98e-09	UP
ENSRNOG00000039048	Cd200r1	CD200 receptor 1 [Source:RGD Symbol;Acc:61837]	11:60848131-60882379	0.341156	0.130817	0.240737	0.529168	0.619348	0.712941	0.23757	0.620486	1.38504	0.00052571	0.0301014	UP
ENSRNOG00000031211	Acsm5	acyl-CoA synthetase medium-chain family member 5 [Source:RGD Symbol;Acc:1309578]	1:189233141-189272172	1.68889	1.48403	1.63885	5.49564	4.75666	2.18069	1.60393	4.14433	1.36953	6.43e-07	0.000155134	UP
ENSRNOG00000008736	Slamf8	SLAM family member 8 [Source:RGD Symbol;Acc:1306263]	13:90967739-90977734	0.558247	0.654019	0.391213	1.05834	1.0839	1.93514	0.534493	1.35912	1.34643	5.57e-05	0.00595405	UP
ENSRNOG00000014653	Arl11	ADP-ribosylation factor-like 11 [Source:RGD Symbol;Acc:1308083]	15:41643541-41645685	2.31516	2.95213	2.14207	5.7992	5.37633	7.6622	2.46979	6.27924	1.3462	4.07e-10	2.6e-07	UP
ENSRNOG00000003544	Tbx4	T-box 4 [Source:RGD Symbol;Acc:1309057]	10:73333119-73362783	0.144451	0.330018	0.4205	0.513488	0.661079	1.08054	0.298323	0.751701	1.33328	0.000839722	0.0416199	UP
ENSRNOG00000048256	Fam160a1	family with sequence similarity 160, member A1 [Source:RGD Symbol;Acc:1565007]	2:184941700-184993341	0.434574	0.333235	0.229993	0.968969	0.788943	0.735192	0.332601	0.831035	1.32112	0.000498504	0.0289103	UP
ENSRNOG00000057901	AC126537.1	Protein LOC100910965; RGD1311188 protein [Source:UniProtKB/TrEMBL;Acc:B1WC62]	7:117026097-117032863	0.452124	0.921696	0.789711	2.28226	2.25736	0.857901	0.721177	1.79917	1.31891	0.000484101	0.0282407	UP
ENSRNOG00000011718	C1rl	complement component 1, r subcomponent-like [Source:RGD Symbol;Acc:1302936]	4:157107469-157123446	0.504973	0.496961	0.392019	0.96935	1.38669	1.10558	0.464651	1.15387	1.31226	2.64e-05	0.00329949	UP
ENSRNOG00000005903	St14	suppression of tumorigenicity 14 (colon carcinoma) [Source:RGD Symbol;Acc:69288]	8:32240133-32280869	0.539757	0.362176	0.642799	1.6222	1.04122	1.15489	0.514911	1.27277	1.30558	4.6e-06	0.000798708	UP
ENSRNOG00000034174	Bpifb4	BPI fold containing family B, member 4 [Source:RGD Symbol;Acc:1561174]	3:149424392-149449350	1.26835	0.865348	1.08597	2.14826	3.49222	2.24603	1.07322	2.62884	1.29248	1.76e-06	0.000373567	UP
ENSRNOG00000004698	Cd244	Cd244 molecule, natural killer cell receptor 2B4 [Source:RGD Symbol;Acc:68400]	13:89975267-89995974	0.534726	0.599078	0.454034	1.14051	1.00116	1.68296	0.529279	1.27488	1.26826	4.93e-05	0.00544205	UP
ENSRNOG00000025094	Gpr183	G protein-coupled receptor 183 [Source:RGD Symbol;Acc:1598095]	15:108364701-108376221	1.07104	0.914218	1.18775	2.71949	2.67372	2.00994	1.05767	2.46772	1.22229	3.15e-06	0.000588215	UP
ENSRNOG00000009260	Cnr2	cannabinoid receptor 2 (macrophage) [Source:RGD Symbol;Acc:619713]	5:154260062-154268126	0.199679	0.508812	0.226052	0.90499	0.560779	0.692178	0.311514	0.719316	1.20733	0.000452804	0.0269218	UP
ENSRNOG00000026306	Clec5a	C-type lectin domain family 5, member A [Source:RGD Symbol;Acc:1584755]	4:68808359-68819928	0.239908	0.337291	0.263833	0.494647	0.918325	0.525252	0.280344	0.646075	1.2045	0.000282496	0.0192058	UP
ENSRNOG00000046452	Fcgr2b	Fc fragment of IgG, low affinity IIb, receptor [Source:RGD Symbol;Acc:631331]	13:89327794-89433815	1.84728	2.00457	1.11381	4.03561	3.87275	3.04313	1.65522	3.6505	1.14107	2.77e-08	1.02e-05	UP
ENSRNOG00000042628	RGD1561145	similar to novel protein [Source:RGD Symbol;Acc:1561145]	16:9023387-9054664	0.808808	0.426442	0.95299	1.66348	1.51429	1.64431	0.729413	1.60736	1.13988	0.00057465	0.0318327	UP
ENSRNOG00000012723	Trim55	tripartite motif-containing 55 [Source:RGD Symbol;Acc:1306943]	2:104416972-104459107	0.354349	0.716119	0.687668	1.00767	1.548	1.29298	0.586045	1.28288	1.13031	0.000188743	0.0140852	UP
ENSRNOG00000001224	Itgb2	integrin, beta 2 [Source:RGD Symbol;Acc:1305581]	20:11777783-11815647	4.40049	2.85743	5.09033	8.51072	8.59585	9.17178	4.11609	8.75945	1.08957	7.2e-11	5.69e-08	UP
ENSRNOG00000029386	RT1-N2	RT1 class Ib, locus N2 [Source:RGD Symbol;Acc:1595850]	20:3146856-3150852	3.98175	1.79006	2.24637	5.99085	5.66347	5.16978	2.67273	5.60803	1.06918	7.29e-06	0.00115383	UP
ENSRNOG00000038835	Cd86	CD86 molecule [Source:RGD Symbol;Acc:628714]	11:67082193-67118795	0.857113	0.57842	0.698635	1.71837	1.41218	1.31356	0.71139	1.48137	1.05822	0.000101055	0.00920947	UP
ENSRNOG00000020845	Tyrobp	Tyro protein tyrosine kinase binding protein [Source:RGD Symbol;Acc:1303081]	1:88875375-88879303	9.87357	10.685	10.2112	24.7997	18.486	20.6217	10.2566	21.3025	1.05447	6.74e-10	3.92e-07	UP
ENSRNOG00000019728	Itgam	integrin, alpha M [Source:RGD Symbol;Acc:2926]	1:199495298-199623960	3.79042	2.30083	3.19099	7.09028	6.64919	5.28205	3.09408	6.34051	1.03509	7.6e-11	5.78e-08	UP
ENSRNOG00000017421	Alpk2	alpha-kinase 2 [Source:RGD Symbol;Acc:1564431]	18:60960662-61057365	2.07367	2.14606	1.95012	5.00984	4.24998	3.25094	2.05662	4.17025	1.01986	1.11e-10	7.84e-08	UP
ENSRNOG00000043311	Birc7	baculoviral IAP repeat-containing 7 [Source:RGD Symbol;Acc:1562883]	3:176439199-176443195	3.46951	3.27329	2.39214	4.57632	7.63558	6.29691	3.04498	6.1696	1.01875	8.96e-05	0.00839827	UP
ENSRNOG00000008816	Gpnmb	glycoprotein (transmembrane) nmb [Source:RGD Symbol;Acc:71008]	4:78694447-78715683	5.09575	6.16121	4.71399	9.45564	11.6185	11.2682	5.32365	10.7808	1.01797	8.37e-13	1.03e-09	UP
ENSRNOG00000000443	C4a	complement component 4A (Rodgers blood group) [Source:RGD Symbol;Acc:620005]	20:4302347-4508214	1.73178	1.73698	1.63948	5.9459	2.39006	2.00369	1.70275	3.44655	1.01729	0.000941568	0.0444402	UP
ENSRNOG00000015972	Ano5	anoctamin 5 [Source:RGD Symbol;Acc:1564265]	1:106896790-106968885	3.40228	3.9827	3.69315	1.96787	1.9074	1.64128	3.69271	1.83885	-1.00587	1.18e-08	4.66e-06	DOWN
ENSRNOG00000001627	Abi3bp	ABI family, member 3 (NESH) binding protein [Source:RGD Symbol;Acc:1562717]	11:46208075-46369577	2.84363	3.42677	2.17845	1.89248	1.57453	0.702152	2.81628	1.38972	-1.019	0.000423244	0.0256751	DOWN
ENSRNOG00000006010	Slc6a20	solute carrier family 6 (proline IMINO transporter), member 20 [Source:RGD Symbol;Acc:621651]	8:132665927-132753292	16.9204	20.4524	12.9561	12.7114	8.33281	3.66734	16.7763	8.23717	-1.0262	0.000527558	0.0301014	DOWN
ENSRNOG00000020246	Myl9	myosin, light chain 9, regulatory [Source:RGD Symbol;Acc:1311235]	3:152857592-152863960	14.1918	20.7256	29.4015	13.5455	12.4884	5.20449	21.4396	10.4128	-1.04192	0.000450667	0.0269218	DOWN
ENSRNOG00000028036	Adamts7	ADAM metallopeptidase with thrombospondin type 1 motif, 7 [Source:RGD Symbol;Acc:1306713]	8:97535777-97575655	0.561199	0.778038	0.826934	0.299241	0.544818	0.204775	0.722057	0.349611	-1.04636	0.000645922	0.0345258	DOWN
ENSRNOG00000010841	Col8a2	collagen, type VIII, alpha 2 [Source:RGD Symbol;Acc:1305182]	5:144308611-144335172	2.20305	2.73637	2.01094	1.5928	1.18848	0.55183	2.31679	1.11104	-1.06022	0.000226282	0.0163918	DOWN
ENSRNOG00000015921	Esco2	establishment of sister chromatid cohesion N-acetyltransferase 2 [Source:RGD Symbol;Acc:1593313]	15:42500929-42518855	0.415399	0.456262	0.503874	0.221509	0.194436	0.227373	0.458512	0.214439	-1.09639	0.000814389	0.0408363	DOWN
ENSRNOG00000005695	Mgp	matrix Gla protein [Source:RGD Symbol;Acc:3088]	4:170856751-170860225	10.8932	14.9077	20.0163	9.14521	7.08772	4.94759	15.2724	7.06017	-1.11315	2.26e-05	0.002941	DOWN
ENSRNOG00000060851	AC105662.1	-	5:173003557-173004039	8.16027	4.9906	5.54299	3.82898	2.03707	2.67997	6.23129	2.84868	-1.12924	0.000512767	0.0296505	DOWN
ENSRNOG00000015902	Cpxm2	carboxypeptidase X (M14 family), member 2 [Source:RGD Symbol;Acc:1310955]	1:204048785-204087001	1.99117	3.03965	2.27821	1.52126	1.03867	0.780798	2.43634	1.11357	-1.12952	2.36e-05	0.00300462	DOWN
ENSRNOG00000033251	Rn60_14_0474.1	-	14:47200961-47203288	0.506083	0.600352	0.532028	0.224884	0.315842	0.207752	0.546154	0.249493	-1.13031	0.00104337	0.0477519	DOWN
ENSRNOG00000059500	Cdkn1c	CDKI protein long isoform; Cyclin-dependent kinase inhibitor 1C (P57), isoform CRA_b; Protein Cdkn1c [Source:UniProtKB/TrEMBL;Acc:Q69DC1]	1:216661080-216663721	3.35194	4.28411	1.89735	1.7873	1.71157	0.833934	3.1778	1.44427	-1.13769	0.000360845	0.0226542	DOWN
ENSRNOG00000012049	Sox7	SRY (sex determining region Y)-box 7 [Source:RGD Symbol;Acc:1310038]	15:47293699-47300460	1.12186	1.10742	1.45919	0.687287	0.536268	0.444207	1.22949	0.555921	-1.14511	1.41e-05	0.00199935	DOWN
ENSRNOG00000061359	AABR07028009.1	-	17:52755621-52756367	2.83154	2.43271	3.15463	1.56569	1.30896	0.91846	2.80629	1.26437	-1.15024	0.000555765	0.0312239	DOWN
ENSRNOG00000022273	RGD1563242	similar to riboflavin kinase [Source:RGD Symbol;Acc:1563242]	1:236494221-236501733	18.1054	9.56418	19.5974	6.72576	6.8991	7.6022	15.7557	7.07569	-1.15493	4.08e-08	1.34e-05	DOWN
ENSRNOG00000028598	Edar	ectodysplasin-A receptor [Source:RGD Symbol;Acc:1561714]	20:28179140-28263037	2.16891	1.92469	1.06273	0.961843	0.830939	0.47017	1.71878	0.754317	-1.18814	0.000178161	0.0137094	DOWN
ENSRNOG00000008680	Loxl1	lysyl oxidase-like 1 [Source:RGD Symbol;Acc:1308752]	8:63067300-63092009	1.26216	2.36602	2.25901	1.2862	0.840211	0.429858	1.96239	0.852089	-1.20354	0.000622333	0.0339043	DOWN
ENSRNOG00000010326	Col20a1	collagen, type XX, alpha 1 [Source:RGD Symbol;Acc:1563901]	3:176494768-176526018	0.904185	1.08688	1.00023	0.404996	0.451429	0.435522	0.997096	0.430649	-1.21122	8.9e-07	0.000204557	DOWN
ENSRNOG00000060356	Kif15	kinesin family member 15 [Source:RGD Symbol;Acc:727790]	8:132032944-132103927	0.671104	1.36349	0.762399	0.558579	0.265594	0.376283	0.93233	0.400152	-1.22029	0.000366376	0.0229004	DOWN
ENSRNOG00000030726	Asgr2	asialoglycoprotein receptor 2 [Source:RGD Symbol;Acc:2161]	10:56710464-56723611	1.11685	1.14398	0.959882	0.578506	0.557602	0.24452	1.07357	0.460209	-1.22205	0.000132212	0.01127	DOWN
ENSRNOG00000020369	Igf2	insulin-like growth factor 2 [Source:RGD Symbol;Acc:2870]	1:215828102-215846911	26.2372	51.541	28.4951	22.8128	14.7212	6.38263	35.4244	14.6389	-1.27494	0.00011603	0.0101983	DOWN
ENSRNOG00000022239	Tusc5	tumor suppressor candidate 5 [Source:RGD Symbol;Acc:1307639]	10:63471331-63491713	0.723827	0.785043	0.702386	0.441101	0.309756	0.158473	0.737085	0.30311	-1.28199	7.42e-05	0.00726239	DOWN
ENSRNOG00000019648	Col6a3	collagen, type VI, alpha 3 [Source:RGD Symbol;Acc:1308704]	9:97926787-98004546	2.14479	3.12723	1.80949	1.54068	0.92149	0.397121	2.3605	0.953097	-1.3084	7.96e-05	0.00764468	DOWN
ENSRNOG00000052130	AABR07041724.1	-	X:137733115-137733324	35.8121	14.5538	39.0944	13.526	11.6409	10.6175	29.8201	11.9281	-1.32192	9.27e-05	0.00864598	DOWN
ENSRNOG00000048297	Qk	quaking [Source:RGD Symbol;Acc:1584886]	1:50828134-51052340	7.4964	6.64476	6.86849	5.70118	1.41659	1.27509	7.00322	2.79762	-1.32382	0.000909631	0.0435566	DOWN
ENSRNOG00000012995	Gpr165	G protein-coupled receptor 165 [Source:RGD Symbol;Acc:1564566]	X:65796429-65804591	8.40939	5.70412	12.6818	3.26192	3.79683	3.62512	8.93176	3.56129	-1.32655	8.07e-11	5.91e-08	DOWN
ENSRNOG00000004610	Lum	lumican [Source:RGD Symbol;Acc:620984]	7:38819771-38826862	5.13188	7.6249	6.07383	3.151	2.86307	1.48957	6.27687	2.50121	-1.32742	5.48e-08	1.78e-05	DOWN
ENSRNOG00000013794	Rbp1	retinol binding protein 1, cellular [Source:RGD Symbol;Acc:3543]	8:106449321-106470842	7.09101	6.76486	4.04118	3.24091	2.24781	1.60185	5.96568	2.36352	-1.33575	2.96e-05	0.00360923	DOWN
ENSRNOG00000016058	Kazald1	Kazal-type serine peptidase inhibitor domain 1 [Source:RGD Symbol;Acc:1310698]	1:264827739-264831151	1.01425	0.967583	1.49973	0.463559	0.482267	0.42299	1.16052	0.456272	-1.34681	0.000331623	0.0212928	DOWN
ENSRNOG00000011360	Dkk2	dickkopf WNT signaling pathway inhibitor 2 [Source:RGD Symbol;Acc:1308639]	2:237148941-237241350	0.953995	1.35683	1.87299	0.75711	0.553835	0.291445	1.39461	0.53413	-1.38459	3.99e-05	0.00449906	DOWN
ENSRNOG00000004273	Ifitm1	interferon induced transmembrane protein 1 [Source:RGD Symbol;Acc:1307601]	1:213766758-213767815	3.58597	3.63564	2.94429	1.91201	1.37718	0.603877	3.38863	1.29769	-1.38476	0.000291267	0.0195258	DOWN
ENSRNOG00000058437	Hist1h2ac	histone cluster 1, H2an [Source:RefSeq peptide;Acc:NP_001100824]	17:44758460-44758852	5.18278	4.41395	5.22254	2.12581	1.49282	1.96386	4.93976	1.86083	-1.40849	0.000109112	0.00980821	DOWN
ENSRNOG00000025608	Lrat	lecithin-retinol acyltransferase (phosphatidylcholine-retinol-O-acyltransferase) [Source:RGD Symbol;Acc:68362]	2:181896305-181905300	0.404669	0.308992	0.270811	0.193449	0.104503	0.0458308	0.328157	0.114594	-1.51786	0.000221522	0.0161654	DOWN
ENSRNOG00000004865	Pkd1l1	polycystic kidney disease 1 like 1 [Source:RGD Symbol;Acc:1564724]	14:89060447-89179507	0.210507	0.169122	0.155634	0.032074	0.0625589	0.0877913	0.178421	0.0608081	-1.55295	0.000380045	0.0234868	DOWN
ENSRNOG00000004882	Capn6	calpain 6 [Source:RGD Symbol;Acc:70960]	X:115049154-115073890	2.07033	2.15955	1.72816	0.640999	0.778041	0.609257	1.98601	0.676099	-1.55457	3.22e-12	3.54e-09	DOWN
ENSRNOG00000013791	Enpp3	ectonucleotide pyrophosphatase/phosphodiesterase 3 [Source:RGD Symbol;Acc:708511]	1:21613148-21684480	0.876704	0.864797	0.74096	0.452392	0.317695	0.0619137	0.827487	0.277334	-1.57711	5.31e-05	0.00570256	DOWN
ENSRNOG00000042860	Pappa2	pappalysin 2 [Source:RGD Symbol;Acc:1591785]	13:76389150-76660245	0.411151	0.538178	0.632844	0.173872	0.176961	0.178481	0.527391	0.176438	-1.57971	5.05e-10	3.02e-07	DOWN
ENSRNOG00000025670	Shisa3	shisa family member 3 [Source:RGD Symbol;Acc:1565710]	14:42216654-42221225	0.892664	1.31774	0.935487	0.342704	0.668502	0.0391035	1.04863	0.350103	-1.58265	0.000573796	0.0318327	DOWN
ENSRNOG00000053047	Top2a	topoisomerase (DNA) II alpha [Source:MGI Symbol;Acc:MGI:98790]	10:86901007-86932154	0.346632	0.469934	0.516552	0.171621	0.185423	0.0813058	0.444373	0.146117	-1.60465	2.35e-06	0.000469408	DOWN
ENSRNOG00000026177	Mgam	maltase-glucoamylase [Source:MGI Symbol;Acc:MGI:1203495]	4:68849033-68996961	0.52915	0.329701	0.52514	0.179548	0.045032	0.223808	0.461331	0.149463	-1.62602	2.1e-05	0.00276603	DOWN
ENSRNOG00000059750	BC028528	cDNA sequence BC028528 [Source:MGI Symbol;Acc:MGI:2385885]	2:197996981-198002625	3.75674	1.86416	2.46602	0.117846	1.37912	0.725674	2.69564	0.74088	-1.86332	0.000111172	0.00990331	DOWN
ENSRNOG00000021713	Kif18b	kinesin family member 18B [Source:RGD Symbol;Acc:1310360]	10:91008269-91027731	0.150866	0.278389	0.311087	0.0804554	0.0941546	0.0206531	0.246781	0.0650877	-1.92277	0.000630114	0.0341279	DOWN
ENSRNOG00000003357	Col3a1	collagen, type III, alpha 1 [Source:RGD Symbol;Acc:71029]	9:52023295-52059217	10.5055	17.8728	18.426	7.43384	3.55009	1.24182	15.6014	4.07525	-1.93672	2.47e-06	0.000483347	DOWN
ENSRNOG00000004632	Pmch	pro-melanin-concentrating hormone [Source:RGD Symbol;Acc:3358]	7:28654733-28657522	2.04853	0.521383	0.582622	0.414336	0.220423	0.154645	1.05084	0.263135	-1.99767	0.00069422	0.0360339	DOWN
ENSRNOG00000022610	Agbl1	ATP/GTP binding protein-like 1 [Source:RGD Symbol;Acc:1560280]	1:137799185-138472908	0.437311	1.02703	0.617244	0.233189	0.198487	0.0652865	0.693863	0.165654	-2.06648	3.19e-06	0.000589197	DOWN
ENSRNOG00000003897	Col1a1	collagen, type I, alpha 1 [Source:RGD Symbol;Acc:61817]	10:82745801-82762789	9.3334	18.9881	13.4808	5.32093	3.69303	0.780285	13.9341	3.26475	-2.09358	1.82e-06	0.000379777	DOWN
ENSRNOG00000013426	Mrgprf	MAS-related GPR, member F [Source:RGD Symbol;Acc:708478]	1:218466289-218476224	0.86494	1.10744	1.40883	0.428241	0.308453	0.0338301	1.12707	0.256841	-2.13363	2.38e-07	6.27e-05	DOWN
ENSRNOG00000002265	Casr	calcium-sensing receptor [Source:RGD Symbol;Acc:2277]	11:67188630-67258771	0.299666	0.546885	0.301965	0.0983286	0.0863142	0.0504637	0.382839	0.0783688	-2.28839	6.04e-08	1.9e-05	DOWN
ENSRNOG00000025946	Igf2bp2	insulin-like growth factor 2 mRNA binding protein 2 [Source:RGD Symbol;Acc:1305614]	11:82466071-82621079	0.195678	0.343897	0.232078	0	0.0271384	0.119011	0.257218	0.0487163	-2.40051	0.000305837	0.0200272	DOWN
ENSRNOG00000020953	Ms4a7	membrane-spanning 4-domains, subfamily A, member 7 [Source:RGD Symbol;Acc:1305549]	1:227490777-227506822	0.243721	0.183552	0.405435	0.0742692	0	0.0381303	0.277569	0.0374665	-2.88917	0.000288727	0.0194805	DOWN
ENSRNOG00000049695	Myh1	myosin, heavy chain 1, skeletal muscle, adult [Source:RGD Symbol;Acc:735061]	10:53713938-53848347	0.0531089	0.0560012	0.0277497	0.00871432	0	0.00447399	0.0456199	0.0043961	-3.37537	3.84e-06	0.00068474	DOWN
ENSRNOG00000060523	Rps2-ps2	-	20:3134704-3135301	0.261965	5.52526	0.254223	0.139721	0.163511	0.143467	2.01381	0.148899	-3.75752	0.00068255	0.0356151	DOWN
ENSRNOG00000021555	Mis18a	MIS18 kinetochore protein A [Source:RGD Symbol;Acc:1310778]	11:30879887-30893310	0	0.941811	0.611824	0	0	0.0575407	0.517878	0.0191802	-4.75492	0.000454164	0.0269218	DOWN
