# Supplementary material for: LncRNAs down-regulate Myh1, Casr, and Mis18a expression in the Substantia Nigra of aged male rats
Source: Aging (Albany NY). 2019 Oct 2;11(19):8313–28. doi: 10.18632/aging.102321 (PMC6814601; doi:10.18632/aging.102321)
Supplement: Supplementary Table 2 [file aging-11-102321-s013.xlsx]

## Sheet: Table 2
lncRNA_id	locus	length	1_FPKM	2_FPKM	3_FPKM	4_FPKM	5_FPKM	6_FPKM	6Mon	24Mon	log2FC	Pvalue	Qvalue	updown
MSTRG.22389.27	6:14386109-14396104	9976	5.82808	5.95142	6.03317	0	0	0	5.93755	0	#NAME?	4.32225e-41	1.01015e-36	DOWN
NONRATT012419.2	17:31400761-31403685	2925	32.4607	31.8615	30.2319	0.173269	0.203662	0.203564	31.518	0.193498	-7.34771	4.27573e-36	4.9964e-32	DOWN
MSTRG.22359.4	6:11725122-11737356	12179	0	0	0	1.51602	1.64909	1.94942	0	1.70485	Inf	1.66713e-32	1.29875e-28	UP
NONRATT005910.2	10:82841522-82852738	656	15.7933	18.5399	18.753	0	0	0	17.6954	0	#NAME?	1.56898e-27	9.16717e-24	DOWN
NONRATT024648.2	6:133778660-133800903	455	0	0	0	26.7347	27.4947	23.064	0	25.7644	Inf	2.27889e-27	1.0652e-23	UP
NONRATT014386.2	19:56210255-56213296	713	37.5695	30.0781	25.9734	0.507711	0.238714	0.521897	31.207	0.422774	-6.20584	1.66176e-24	6.47282e-21	DOWN
MSTRG.18145.1	3:146435386-146436674	1267	0	0	0	4.51468	5.70932	5.52176	0	5.24859	Inf	2.03946e-23	6.80916e-20	UP
MSTRG.7018.3	12:27982633-27989169	6423	0.848952	2.54338	3.19215	0	0.0132495	0	2.19483	0.00441649	-8.95699	4.31255e-20	1.25986e-16	DOWN
NONRATT031066.2	X:72377628-72379110	1483	0.919232	0.72788	0.401375	12.1572	11.3049	11.1916	0.682829	11.5512	4.08038	2.35035e-15	6.10334e-12	UP
ENSRNOT00000089548	1:55707398-55754357	2255	0.0906844	0.0957253	0.117308	1.766	2.0002	1.8813	0.101239	1.8825	4.21681	1.76977e-14	4.13612e-11	UP
NONRATT007039.2	11:69099288-69099674	387	0.352271	0.371853	0.341854	12.7226	6.81713	7.30794	0.355326	8.94924	4.65455	1.02513e-13	2.17803e-10	UP
MSTRG.18145.2	3:146435386-146436674	1269	4.45809	4.08315	3.02293	0.399379	0.0670618	0	3.85472	0.15548	-4.63182	3.71834e-13	7.24178e-10	DOWN
MSTRG.12463.1	18:38497482-38498094	244	6.70442	5.60382	3.52391	0	0	0	5.27739	0	#NAME?	4.16149e-11	7.4814e-08	DOWN
NONRATT028621.2	8:44155846-44159016	2861	2.95418	1.66016	5.36328	0.0252955	0.267708	0.0520359	3.32587	0.115013	-4.85386	1.29317e-10	2.15877e-07	DOWN
MSTRG.12069.7	17:89394648-89453634	871	0.704262	0	0.455599	12.719	6.35095	5.29787	0.38662	8.12259	4.39295	2.9914e-10	4.6608e-07	UP
NONRATT011307.2	16:8466973-8468661	661	0.206247	0	0.200148	2.62899	2.18869	2.25193	0.135465	2.35654	4.12068	3.50988e-10	5.12683e-07	UP
NONRATT007148.2	11:83921583-83926546	670	0	0	0.394819	10.0504	3.42946	2.33278	0.131606	5.27089	5.32375	1.99709e-09	2.74553e-06	UP
NONRATT025255.2	6:115320465-115324150	3686	0.628718	0.605241	0.251207	9.97896	3.85572	4.01814	0.495056	5.95094	3.58746	2.25757e-09	2.9312e-06	UP
NONRATT027255.2	7:132430852-132432796	1945	0.035046	0.0369941	0.0339926	0.260571	6.60693	3.82654	0.0353442	3.56468	6.65615	6.14929e-09	7.56395e-06	UP
MSTRG.24823.1	7:93128932-93141631	12388	8.52831	8.15041	0	0	0	0	5.55957	0	#NAME?	2.8177e-08	3.13583e-05	DOWN
NONRATT013324.2	18:28361287-28380933	1680	0.0811482	0.0856589	0.0393545	0.818865	0.709178	1.24045	0.0687205	0.92283	3.74725	2.77071e-08	3.13583e-05	UP
MSTRG.14331.2	2:83401910-83429564	27620	0	0	0	0	3.10893	3.84527	0	2.31807	Inf	3.03447e-08	3.22357e-05	UP
MSTRG.15011.1	2:183168381-183171954	3554	0	0	0	6.72316	0	9.23524	0	5.31947	Inf	3.33815e-08	3.39199e-05	UP
MSTRG.24823.2	7:93128932-93141631	12390	0	0	0	0	6.6214	6.34936	0	4.32359	Inf	3.5236e-08	3.43126e-05	UP
MSTRG.12075.1	17:89418194-89427332	767	0.266615	0	0.431175	2.92643	3.1067	1.64956	0.232596	2.5609	3.46075	4.51193e-08	4.09878e-05	UP
NONRATT000490.2	1:82230930-82234051	3122	0.0655008	0.0691418	0.0635532	0.0695657	29.1945	20.5018	0.0660653	16.5886	7.97209	4.55986e-08	4.09878e-05	UP
NONRATT004982.2	10:94252070-94254046	1977	37.5107	38.5489	0.133803	0.109855	0.172183	0.112955	25.3978	0.131664	-7.59169	5.40808e-08	4.68119e-05	DOWN
MSTRG.3738.31	10:8667302-8678472	7074	0	0	0	5.09731	5.75052	0	0	3.61594	Inf	5.63372e-08	4.70234e-05	UP
MSTRG.12068.1	17:89375298-89445712	815	0.669099	0	1.05501	12.6156	9.60675	4.20073	0.574704	8.80769	3.93787	6.43634e-08	5.06871e-05	UP
NONRATT006242.2	10:102244680-102245116	437	0.779914	13.8332	8.62681	0.165608	0.19474	0.170337	7.74664	0.176895	-5.45261	6.50641e-08	5.06871e-05	DOWN
MSTRG.7892.2	13:80130913-80136322	5291	5.24311	0	5.26265	0	0	0	3.50192	0	#NAME?	7.15934e-08	5.39745e-05	DOWN
MSTRG.24823.4	7:93128933-93141631	10231	2.36506	0	3.11594	0	0	0	1.827	0	#NAME?	7.52037e-08	5.49245e-05	DOWN
NONRATT024385.2	6:95314977-95338931	1165	0.351062	6.60971	5.73396	0.186424	0	0.0638947	4.23158	0.0834396	-5.66432	7.9504e-08	5.63057e-05	DOWN
NONRATT021122.2	4:8212207-8255519	1376	0	0	0	0.789292	0.247388	1.13587	0	0.724184	Inf	1.03613e-07	7.12216e-05	UP
NONRATT024378.2	6:94611173-94642692	270	0.504922	0.799484	0.734864	4.02247	6.30381	11.3018	0.679756	7.20936	3.40678	1.43016e-07	9.28454e-05	UP
NONRATT027313.2	7:139454938-139469106	3854	0	0	0	1.97267	0	1.77665	0	1.24977	Inf	1.40926e-07	9.28454e-05	UP
MSTRG.20487.1	5:15780036-15787619	7321	0	2.54596	1.67133	0	0	0	1.40576	0	#NAME?	1.59529e-07	0.000100766	DOWN
MSTRG.1647.9	1:122648400-122661865	4922	0	0	0	0	2.3169	3.56859	0	1.96183	Inf	1.67601e-07	0.000103079	UP
NONRATT000761.2	1:116676698-116677607	910	0.224718	24.0412	27.8367	0.238664	0.187036	0.245398	17.3675	0.223699	-6.27869	2.09779e-07	0.000125711	DOWN
MSTRG.4165.1	10:43451932-43456469	3322	2.70836	0	3.52398	0	0	0	2.07744	0	#NAME?	2.22707e-07	0.000130122	DOWN
NONRATT007029.2	11:67650857-67654378	3522	1.99334	2.20678	2.2347	10.7109	10.4868	9.38253	2.14494	10.1934	2.24863	2.30336e-07	0.000131297	UP
MSTRG.26293.6	8:61678346-61686870	5598	0	1.55552	3.55627	0	0	0	1.70393	0	#NAME?	2.38368e-07	0.000132641	DOWN
MSTRG.25393.1	7:134476017-134478228	1807	0	0	0	5.52965	3.06125	0	0	2.86363	Inf	3.15686e-07	0.000171579	UP
NONRATT005011.2	10:97680659-97683273	2615	0.417042	0.41279	0.45525	22.9818	0.520697	23.9075	0.428361	15.8033	5.20526	3.2782e-07	0.000174124	UP
NONRATT022629.2	5:144871528-144872271	744	23.9112	0.193423	20.9797	0.194642	0.228767	0.2001	15.0281	0.207837	-6.17607	3.52229e-07	0.000182932	DOWN
MSTRG.11973.10	17:78094086-78100113	5891	0	0	0	3.85938	0	0.694867	0	1.51808	Inf	3.92906e-07	0.000199622	UP
NONRATT019976.2	3:162688167-162692046	829	0.739942	2.08344	0.478681	0	0	0	1.10069	0	#NAME?	5.57561e-07	0.00027725	DOWN
MSTRG.6543.7	12:3350241-3364758	8980	0.0303628	0	0	9.84501	0.00947677	4.62471	0.0101209	4.8264	8.89746	6.13286e-07	0.000298606	UP
NONRATT005404.2	10:36307677-36309269	1593	10.2262	0.180719	10.5458	0.181813	0.160266	0.186865	6.98423	0.176314	-5.30788	9.47935e-07	0.000452126	DOWN
NONRATT018312.2	3:71037564-71044961	551	0	0	0	1.18262	0.926694	0.94553	0	1.01828	Inf	1.04274e-06	0.000487396	UP
NONRATT002035.2	1:31068701-31069048	348	0.195875	0.413526	0.380166	18.1016	27.1449	0.427801	0.329856	15.2248	5.52844	1.22364e-06	0.000560741	UP
MSTRG.1948.2	1:162552939-162559528	5323	0	1.39253	4.02577	0	0	0.0139841	1.8061	0.00466136	-8.59791	1.33387e-06	0.000599498	DOWN
NONRATT014518.2	19:19899539-19913553	772	0	0	0	3.09506	0	4.33829	0	2.47778	Inf	1.55941e-06	0.000687643	UP
NONRATT002769.2	1:136739207-136841574	682	10.6938	0.105504	6.59451	0.106115	0.124782	0.109146	5.79795	0.113348	-5.67672	1.66636e-06	0.000721197	DOWN
MSTRG.12069.9	17:89436316-89453608	1604	0.212483	0	0.742194	4.55926	4.35062	2.18082	0.318226	3.6969	3.53819	1.70924e-06	0.000726301	UP
NONRATT028679.2	8:68569530-68571914	1511	0	0	0	1.77301	0	1.52693	0	1.09998	Inf	2.34557e-06	0.000978897	UP
NONRATT019577.2	3:107560178-107697642	1858	1.46741	0.154944	2.52738	0.116891	0.0458027	0.0400631	1.38324	0.0675857	-4.35519	2.72654e-06	0.00111793	DOWN
MSTRG.12072.1	17:89407926-89462591	1832	0.446455	0	1.01086	7.43036	6.45702	3.9813	0.485773	5.95623	3.61605	3.87875e-06	0.00156294	UP
NONRATT024063.2	6:25100498-25102457	1960	0.452077	0.514027	0.911115	21.057	0.651286	15.227	0.62574	12.3118	4.29833	4.13214e-06	0.00163682	UP
MSTRG.23045.2	6:95176834-95178292	832	17.5316	0.778429	14.5474	0.69622	0.715997	0.626186	10.9525	0.679468	-4.01071	4.36581e-06	0.00170056	DOWN
NONRATT010417.2	15:33617845-33618376	532	0.384386	10.8218	12.9295	0.272206	0.479895	0.279839	8.04523	0.34398	-4.54774	5.26047e-06	0.00201435	DOWN
NONRATT023570.2	5:140107145-140108199	1055	0.452276	0.136405	0.125401	12.0792	0.16133	11.6402	0.238027	7.96022	5.06361	5.34378e-06	0.00201435	UP
ENSRNOT00000090050	20:3403204-3403731	528	4.00182	3.95267	0	0	0	0	2.6515	0	#NAME?	6.90029e-06	0.00253252	DOWN
MSTRG.18964.9	4:35024440-35032165	7678	3.20473	4.28342	0.103367	0.132026	0.133006	0.145404	2.53051	0.136812	-4.20916	6.93514e-06	0.00253252	DOWN
NONRATT020543.2	4:99133835-99146147	773	15.2546	11.8235	5.13368	1.77968	0.110092	1.92565	10.7373	1.27181	-3.07768	9.55028e-06	0.00343384	DOWN
NONRATT009419.2	14:71437010-71452244	607	5.38994	6.28366	4.24949	0.357799	0.4206	1.96186	5.30769	0.91342	-2.53874	9.93457e-06	0.00351789	DOWN
NONRATT021357.2	4:67242257-67243046	790	9.66322	0.910985	3.51627	0.733234	0.215447	0.188449	4.69682	0.379043	-3.63125	1.04755e-05	0.00365408	DOWN
ENSRNOT00000076715	13:78997305-78999355	2051	2.19336	0.0350822	2.38629	0.0706064	0.0829853	0.0362932	1.53824	0.0632949	-4.60305	1.10798e-05	0.00377707	DOWN
NONRATT021671.2	4:131415443-131464514	727	0.281284	0	0.545841	2.29068	2.22411	1.33086	0.275708	1.94855	2.82119	1.11513e-05	0.00377707	UP
NONRATT017723.2	20:20638566-20640785	2220	0.122819	0.0972345	0.119157	1.82648	1.84007	0.167618	0.11307	1.27806	3.49866	1.16899e-05	0.00390292	UP
NONRATT021706.2	4:145369268-145370746	599	2.61722	3.60428	1.43545	0.241759	0.56829	0.372808	2.55232	0.394286	-2.69449	1.3151e-05	0.00432889	DOWN
ENSRNOT00000080938	15:98619241-98621413	1196	1.6527	0	1.21662	0	0	0	0.95644	0	#NAME?	1.49088e-05	0.00483936	DOWN
NONRATT005366.2	10:29357389-29367841	511	0	0	0	2.12537	0	4.80638	0	2.31059	Inf	1.6577e-05	0.00530714	UP
NONRATT016159.2	2:57122375-57196522	647	0.948087	0.333633	1.02229	0	0	0	0.768003	0	#NAME?	1.70738e-05	0.00539232	DOWN
NONRATT004060.2	10:13153815-13156163	2349	0.20313	0.245083	0.197109	209.945	0.253601	0.25348	0.215107	70.1506	8.34926	1.83084e-05	0.00570516	UP
MSTRG.11222.3	17:2936988-3014739	743	0	1.6466	2.75951	0	0	0	1.4687	0	#NAME?	2.07175e-05	0.00637089	DOWN
NONRATT000382.2	1:78388540-78390911	2372	1.06322	0.515778	9.64765	0.0305103	0.28702	0.21964	3.74222	0.179057	-4.3854	2.14748e-05	0.00651803	DOWN
NONRATT004037.2	10:730277-750521	838	0.406709	0.429402	0.71031	0	0	0	0.515474	0	#NAME?	2.42307e-05	0.00726019	DOWN
NONRATT023144.2	5:57055064-57059725	420	6.49153	2.22747	0	0	0	0	2.90633	0	#NAME?	2.47527e-05	0.00732274	DOWN
MSTRG.28613.1	KL568458.1:22116-53612	1367	0.0498643	0	0.58058	4.18442	2.05445	1.03445	0.210148	2.42444	3.52817	2.53563e-05	0.00740752	UP
NONRATT004578.2	10:63441165-63442293	1129	0.060376	7.20293	4.21794	0.128267	0.0753777	0.263663	3.82708	0.155769	-4.61876	2.59515e-05	0.00748781	DOWN
NONRATT021436.2	4:84678970-84680975	2006	0.101941	0.645752	0.329722	0.794093	0.848469	111.973	0.359138	37.872	6.72045	2.64628e-05	0.00754223	UP
NONRATT003558.2	1:225925942-225937826	1901	0.466107	0	1.46126	0	0	0	0.642455	0	#NAME?	2.76201e-05	0.00777723	DOWN
NONRATT006714.2	11:83975348-83975683	336	8.31728	0.214147	9.25167	0.215388	0.506556	0.22154	5.9277	0.314495	-4.23637	3.06271e-05	0.00852126	DOWN
NONRATT028173.2	8:128849728-128850365	638	173.393	20.9805	143.682	12.0299	15.8734	1.74986	112.685	9.88438	-3.511	3.18133e-05	0.00874715	DOWN
NONRATT021997.2	5:74369-152115	557	0	0	0	1.94985	0	2.93967	0	1.62984	Inf	3.43825e-05	0.00934363	UP
NONRATT019532.2	3:94702639-94704697	2059	0.43034	0.489312	0.160617	6.22433	0.413314	4.87982	0.36009	3.83916	3.41436	3.81848e-05	0.0102577	UP
NONRATT000541.2	1:85437811-85438922	534	2.80815	2.29106	0	0	0	0	1.69973	0	#NAME?	3.87716e-05	0.0102969	DOWN
NONRATT013451.2	18:52353372-52355955	400	5.62323	1.97908	6.94463	0.54296	0.425507	1.30247	4.84898	0.756978	-2.67936	3.96166e-05	0.0104031	DOWN
NONRATT000579.2	1:88875447-88879305	669	0.40756	0.64543	0.69209	2.70573	1.7809	3.33755	0.581694	2.60806	2.16465	4.49636e-05	0.011676	UP
NONRATT030073.2	9:66454056-66483409	740	1.84219	1.65328	0	0	0	0	1.16516	0	#NAME?	4.60798e-05	0.0118344	DOWN
NONRATT000231.2	1:56025996-56054963	817	0.250298	0	0.0809248	0.974833	0.729143	1.27537	0.110408	0.993114	3.16912	4.75812e-05	0.0120872	UP
NONRATT021930.2	4:171069769-171176637	1042	0.654104	0.345335	0.253866	0	0	0	0.417769	0	#NAME?	4.98725e-05	0.012533	DOWN
MSTRG.5734.17	11:20391902-20406444	14513	0.00469679	3.40165	0	0	0	0	1.13545	0	#NAME?	5.1026e-05	0.0126865	DOWN
NONRATT015040.2	2:52828886-52829605	720	0.0946729	0.0999354	0	0.905035	0.590982	0.930363	0.0648694	0.808793	3.64016	5.29137e-05	0.0130173	UP
NONRATT025089.2	6:92859581-92860142	562	6.18538	2.68904	5.1782	0.773027	1.51426	1.05947	4.68421	1.11559	-2.07	5.67772e-05	0.0138223	DOWN
NONRATT021062.2	4:183656065-183665754	1443	0.755761	0	0.916685	0	0	0	0.557482	0	#NAME?	5.96917e-05	0.014382	DOWN
NONRATT021136.2	4:10195986-10196294	309	5.95568	0.232859	7.06347	0.234209	0.275409	0.240897	4.41734	0.250172	-4.14219	6.57764e-05	0.0156863	DOWN
NONRATT002918.2	1:154147099-154165450	839	2.03104	2.74478	2.04959	0.345205	0.50716	0.887126	2.27514	0.579831	-1.97225	6.71125e-05	0.0158433	DOWN
MSTRG.12077.1	17:89427723-89430859	1573	0.693302	0	0.798895	4.64911	2.97563	2.60233	0.497399	3.40902	2.77688	7.79427e-05	0.0180356	UP
MSTRG.14950.2	2:172702681-172728034	25211	0	0	0	0	0	2.70711	0	0.90237	Inf	7.75624e-05	0.0180356	UP
NONRATT014176.2	19:32295508-32312372	733	0.557963	0.687239	1.17304	2.96344	2.0898	5.78763	0.806079	3.61363	2.16445	8.74008e-05	0.0200259	UP
MSTRG.10447.10	16:16324125-16332640	8492	0	0	0	0	0	5.3988	0	1.7996	Inf	9.03041e-05	0.0204903	UP
NONRATT030892.2	X:15618322-15619557	407	12.3929	0	13.8128	0.177814	0.627283	0	8.73523	0.268366	-5.02457	9.42641e-05	0.0211831	DOWN
MSTRG.27435.1	9:12445366-12446841	903	1.43417	1.35484	1.02542	3.60827	3.86406	6.34646	1.27148	4.60627	1.85709	9.56555e-05	0.0212911	UP
MSTRG.18846.24	4:11757960-11773315	15182	0	0	0	2.53246	0	0	0	0.844153	Inf	9.74061e-05	0.0213365	UP
NONRATT015195.2	2:115351332-115352788	1457	0.280705	0.246973	43.6692	0.198783	0.233635	0.255396	14.7323	0.229271	-6.00578	9.76856e-05	0.0213365	DOWN
MSTRG.10046.1	15:93113586-93124425	10768	0	0	0	0	0	3.46282	0	1.15427	Inf	0.000101631	0.0219928	UP
NONRATT018272.2	3:62483767-62487699	1322	0.0515616	0.108856	0.100074	0.328624	0.19312	6.24913	0.0868303	2.25696	4.70004	0.000102727	0.0220259	UP
MSTRG.17229.10	3:52645245-52660934	15644	0	0	7.74529	0	0	0	2.58176	0	#NAME?	0.000109431	0.0232502	DOWN
MSTRG.3969.2	10:21399498-21406931	7186	0	0	0	0	0	4.06	0	1.35333	Inf	0.000116155	0.0244545	UP
NONRATT015586.2	2:198421226-198422243	1018	2.20952	1.62595	2.27398	0.640103	0.668773	0.511775	2.03648	0.606884	-1.74659	0.000117192	0.0244545	DOWN
MSTRG.11163.4	16:85722267-85740981	18266	0	4.35353	0	0	0	0	1.45118	0	#NAME?	0.000125551	0.0251627	DOWN
MSTRG.15536.2	2:213042894-213063992	21029	3.9122	0	0	0	0	0	1.30407	0	#NAME?	0.000123026	0.0251627	DOWN
MSTRG.18740.3	4:8777248-8793449	14056	5.55235	0	0	0	0	0	1.85078	0	#NAME?	0.00012597	0.0251627	DOWN
MSTRG.25936.3	8:30448774-30460592	11327	0	0	0	0	6.61168	0	0	2.20389	Inf	0.00012459	0.0251627	UP
MSTRG.3767.2	10:9468263-9558177	13862	0	0	0	0	0	1.89529	0	0.631764	Inf	0.000122684	0.0251627	UP
MSTRG.12164.2	18:8277507-8298449	16286	3.51977	0	0.00405966	0.00444372	0	0	1.17461	0.00148124	-9.63116	0.000135181	0.0263277	DOWN
NONRATT002864.2	1:146757436-146823762	714	1.33646	0.20155	2.22321	0	0.238379	0	1.25374	0.0794598	-3.97987	0.000134271	0.0263277	DOWN
NONRATT029471.2	9:74014582-74017583	3002	2.86084	33.2498	7.00611	1.08537	2.80653	1.43794	14.3722	1.77661	-3.01608	0.000133658	0.0263277	DOWN
NONRATT023334.2	5:92862229-92865113	2885	60.2931	2.74391	2.29253	1.35528	1.50442	1.54786	21.7765	1.46919	-3.88968	0.000136435	0.0263522	DOWN
MSTRG.18871.2	4:12321299-12328509	7191	0	0	0	0	0	2.76343	0	0.921142	Inf	0.000141554	0.0271169	UP
NONRATT025796.2	7:54233227-54237880	2301	21.8019	0	0	0	0	0	7.26729	0	#NAME?	0.000146404	0.0278179	DOWN
MSTRG.17544.5	3:91446455-91453969	7487	0	6.07481	0	0	0	0	2.02494	0	#NAME?	0.000152715	0.0283222	DOWN
NONRATT006049.2	10:89331667-89338192	1177	0.0579137	0.061133	0.280978	0.98429	1.15686	0.44264	0.133342	0.861263	2.69133	0.000153905	0.0283222	UP
NONRATT007879.2	12:24505979-24506410	432	0.157788	0.166559	0.153045	43.5778	0.196994	0.172309	0.159131	14.6491	6.52445	0.000153223	0.0283222	UP
NONRATT023980.2	6:2262820-2280619	677	0	0	0	1.81814	1.25704	0	0	1.02506	Inf	0.000151884	0.0283222	UP
NONRATT028419.2	8:39380394-39404744	386	2.82529	2.42368	1.71353	0.562653	0.44094	0.385686	2.32083	0.463093	-2.32527	0.000169078	0.0308713	DOWN
NONRATT008555.2	13:106681330-106682621	1292	24.9007	0.222822	0.255968	0.22417	0.197604	0.230399	8.45984	0.217391	-5.28227	0.00017352	0.0310667	DOWN
NONRATT016848.2	2:227718789-227719555	358	12.9467	10.4532	7.38982	1.01117	4.04113	2.91054	10.2632	2.65428	-1.95109	0.000172693	0.0310667	DOWN
NONRATT026298.2	7:142238799-142243185	736	0	0	0	18.1999	0	0	0	6.06665	Inf	0.000174136	0.0310667	UP
MSTRG.11809.5	17:58405313-58413500	8166	3.93972	0	0	0	0	0	1.31324	0	#NAME?	0.000182256	0.0320263	DOWN
NONRATT025198.2	6:108876163-108897184	846	0.966792	0	1.25088	0	0	0	0.739225	0	#NAME?	0.000181727	0.0320263	DOWN
MSTRG.16397.11	20:26135962-26147321	10896	2.89632	0	0	0	0	0	0.96544	0	#NAME?	0.00018509	0.0320425	DOWN
NONRATT029038.2	8:119821037-119828852	1165	0.877596	0.741275	0	0	0	0	0.539624	0	#NAME?	0.000183955	0.0320425	DOWN
MSTRG.10447.38	16:16900359-16921805	21427	0	0	1.33347	0	0	0	0.44449	0	#NAME?	0.000190399	0.0324805	DOWN
MSTRG.3954.2	10:24800692-24815835	4728	0	6.24064	0	0	0	0	2.08021	0	#NAME?	0.000189768	0.0324805	DOWN
MSTRG.7204.10	12:40348327-40353072	4323	0	0	0	0	5.3743	0	0	1.79143	Inf	0.000201437	0.0340881	UP
NONRATT016788.2	2:211344017-211344442	426	0.16001	0.168905	45.0245	0.169884	0.199769	0.174735	15.1178	0.181463	-6.38043	0.000202741	0.0340881	DOWN
MSTRG.12074.1	17:89415478-89418019	1860	0.329792	0	0.746752	2.17999	3.66032	1.44052	0.358848	2.42695	2.7577	0.000205887	0.0343699	UP
MSTRG.2206.8	1:180852474-181331778	1139	5.62516	0	0.0580471	0	0	0	1.8944	0	#NAME?	0.000208599	0.0345757	DOWN
MSTRG.14559.1	2:118761318-118816446	4045	0	0	0	0	5.11248	0	0	1.70416	Inf	0.000214509	0.0350885	UP
NONRATT017137.2	20:5354224-5418017	529	0.515421	0.408054	0	2.8743	0.965233	2.25113	0.307825	2.03022	2.72146	0.000214696	0.0350885	UP
NONRATT018597.2	3:122883066-122891284	860	0	0	0	0	0.296865	3.46168	0	1.25285	Inf	0.000219298	0.0353463	UP
NONRATT024220.2	6:43799808-43801622	615	0	0	0	0	3.32103	0.726097	0	1.34904	Inf	0.000218215	0.0353463	UP
MSTRG.12070.1	17:89405949-89467456	1148	1.18748	0	1.84358	12.9297	8.89577	4.21401	1.01035	8.67982	3.10281	0.000224955	0.0360098	UP
MSTRG.10073.2	15:101241723-101253704	11906	0	0	0.00555313	0	0	4.40082	0.00185104	1.46694	9.63025	0.00022777	0.0360505	UP
NONRATT005284.2	10:15154003-15155387	700	0	0	0	0.206877	1.09416	0.531589	0	0.610876	Inf	0.000228294	0.0360505	UP
NONRATT009831.2	14:33649530-33651104	1575	0.0865581	18.0484	0.0839985	0.0459495	0.108065	0.141785	6.073	0.0986001	-5.94468	0.00023106	0.0362422	DOWN
NONRATT027438.2	8:13861289-13871354	1301	0.314363	0	0.0508191	0.0556268	2.68197	4.34775	0.121727	2.36178	4.27815	0.000261079	0.0406778	UP
MSTRG.23080.3	6:97231339-97233013	1568	0	0	0	0	0	5.26872	0	1.75624	Inf	0.000270035	0.0417947	UP
NONRATT019503.2	3:89743718-89745546	1829	0	0	0	4.35466	0	0	0	1.45155	Inf	0.000273085	0.0419886	UP
NONRATT025209.2	6:108129442-108145865	1061	1.2206	0.542601	0	0	0	0	0.587734	0	#NAME?	0.000278155	0.0424886	DOWN
NONRATT031141.2	X:105351451-105359924	1687	0	0	0	0	6.75979	0	0	2.25326	Inf	0.000287346	0.0436075	UP
MSTRG.24456.3	7:47571933-47579678	7579	1.50189	0	0	0	0	0	0.500628	0	#NAME?	0.000296767	0.0444599	DOWN
NONRATT005749.2	10:65611427-65612323	701	0.0972389	0.102644	0.0943161	0.826326	0.9712	0.637018	0.0980664	0.811515	3.04879	0.000295632	0.0444599	UP
MSTRG.3747.3	10:8610166-8613930	3726	0	0	2.96438	0	0	0	0.988128	0	#NAME?	0.000299178	0.0445355	DOWN
NONRATT001649.2	1:247108082-247138155	1773	5.99721	0	0	0	0	0	1.99907	0	#NAME?	0.000306729	0.0451387	DOWN
NONRATT010755.2	15:11832611-11833911	1199	0	0	0	6.09929	0	0	0	2.0331	Inf	0.000309023	0.0451387	UP
NONRATT021928.2	4:170914380-170931969	753	0.0905239	0	0.175694	0.0961096	1.69525	2.76753	0.0887393	1.51963	4.098	0.000308477	0.0451387	UP
MSTRG.12069.2	17:89388848-89453616	6494	0.860663	0.044331	1.49715	9.59993	8.79335	3.16318	0.800716	7.18548	3.16572	0.000314251	0.0456172	UP
MSTRG.1652.4	1:122821885-122848490	5138	1.95009	0	0	0	0	0	0.65003	0	#NAME?	0.000318852	0.0459993	DOWN
NONRATT019160.2	3:10222272-10226930	954	3.42945	0.905226	4.22905	0.683045	0.535229	0.780188	2.85457	0.666154	-2.09935	0.000347489	0.0498231	DOWN
