# Supplementary material for: LncRNAs down-regulate Myh1, Casr, and Mis18a expression in the Substantia Nigra of aged male rats
Source: Aging (Albany NY). 2019 Oct 2;11(19):8313–28. doi: 10.18632/aging.102321 (PMC6814601; doi:10.18632/aging.102321)
Supplement: Supplementary Table 3 [file aging-11-102321-s012.xlsx]

## Sheet: Table 3
circRNA_id	locus	circRNA_type	gene_id	1_SRPBM	2_SRPBM	3_SRPBM	4_SRPBM	5_SRPBM	6_SRPBM	6Mon	24Mon	log2FC	Pvalue	Qvalue	updown
circRNA.4953	1:194864350|194917768(-)	intergenic_region	n/a	0	0	0	1.11891	0.625325	0.465653	0	0.73663	Inf	7.85095e-06	0.0395178	UP
circRNA.6450	2:197906758|197913548(-)	exon	ENSRNOG00000054294(Rprd2:regulation of nuclear pre-mRNA domain containing 2 [Source:MGI Symbol;Acc:MGI:1922387]),	0.509168	0.621293	0.632168	0	0	0	0.587543	0	#NAME?	6.1124e-06	0.0395178	DOWN
circRNA.2908	16:23555922|23600154(+)	exon	ENSRNOG00000013884(Psd3:pleckstrin and Sec7 domain containing 3 [Source:RGD Symbol;Acc:1559968]),	0.581906	0.543632	0.351204	0	0	0	0.492247	0	#NAME?	6.15044e-05	0.206388	DOWN
circRNA.11063	7:74258330|74259380(+)	intergenic_region	n/a	0.581906	0.776617	0.632168	0.149188	0	0	0.663564	0.0497295	-3.73806	0.000103957	0.261634	DOWN
circRNA.10007	6:135672583|135696475(+)	exon	ENSRNOG00000008145(Traf3:Tnf receptor-associated factor 3 [Source:RGD Symbol;Acc:1304633]),	0	0	0.140482	0.671348	0.178664	0.543262	0.0468272	0.464425	3.31002	0.0110683	1	UP
circRNA.10101	6:22373412|22407626(+)	exon	ENSRNOG00000006340(Memo1:mediator of cell motility 1 [Source:RGD Symbol;Acc:1309929]),	0.218215	0.310647	0.280963	0	0	0	0.269942	0	#NAME?	0.0160584	1	DOWN
circRNA.10131	6:27573046|27582987(-)	exon	ENSRNOG00000010800(Hadhb:hydroxyacyl-CoA dehydrogenase/3-ketoacyl-CoA thiolase/enoyl-CoA hydratase (trifunctional protein), beta subunit [Source:RGD Symbol;Acc:620513]),	0.581906	0.46597	0.632168	0	0	0.388044	0.560015	0.129348	-2.11421	0.0373725	1	DOWN
circRNA.10300	6:57704067|57739022(+)	exon	ENSRNOG00000030771(Dgkb:diacylglycerol kinase, beta [Source:RGD Symbol;Acc:2488]),	0	0	2.38819	0	0	0	0.796063	0	#NAME?	0.0134261	1	DOWN
circRNA.10406	6:76455340|76492176(-)	exon	ENSRNOG00000046256(Ralgapa1:Ral GTPase activating protein, alpha subunit 1 (catalytic) [Source:RGD Symbol;Acc:620642]),	0.145477	0.232985	0.491686	0	0	0	0.290049	0	#NAME?	0.0154361	1	DOWN
circRNA.1058	11:86824053|86831108(+)	exon	ENSRNOG00000030245(Tango2:transport and golgi organization 2 homolog (Drosophila) [Source:RGD Symbol;Acc:1310348]),	0.218215	0.232985	0.280963	0	0	0	0.244054	0	#NAME?	0.0295117	1	DOWN
circRNA.10761	7:18533478|18535599(-)	exon	ENSRNOG00000007921(Hnrnpm:heterogeneous nuclear ribonucleoprotein M [Source:RGD Symbol;Acc:620369]),	0.218215	0.388308	0.421445	0	0	0	0.342656	0	#NAME?	0.00337567	1	DOWN
circRNA.10803	7:28987514|28990116(+)	exon	ENSRNOG00000005228(Gnptab:N-acetylglucosamine-1-phosphate transferase, alpha and beta subunits [Source:RGD Symbol;Acc:1564821]),	0.43643	0.621293	0.421445	0	0	0.232826	0.493056	0.0776088	-2.66746	0.00853653	1	DOWN
circRNA.10863	7:32955133|32982696(-)	intergenic_region	n/a	1.01834	0.93194	0.561927	0.447565	0	0.232826	0.837401	0.226797	-1.88452	0.0151151	1	DOWN
circRNA.11078	7:76229137|76229533(-)	exon	ENSRNOG00000042978(Ncald:neurocalcin delta [Source:RGD Symbol;Acc:1560287]),	0.509168	0.388308	0.421445	0.223783	0	0	0.439641	0.0745942	-2.55919	0.0143487	1	DOWN
circRNA.11080	7:76749977|76786263(-)	intergenic_region	n/a	0.363691	0.232985	0.280963	0	0	0	0.292547	0	#NAME?	0.00916709	1	DOWN
circRNA.11172	7:93434909|93436345(-)	intron	ENSRNOG00000043390(Samd12:sterile alpha motif domain containing 12 [Source:RGD Symbol;Acc:1561402]),	0.363691	0	0.561927	0	0	0	0.308539	0	#NAME?	0.0392391	1	DOWN
circRNA.11265	8:109044546|109216053(+)	exon	ENSRNOG00000015389(Stag1:stromal antigen 1 [Source:RGD Symbol;Acc:1310744]),	0	0	0	0.223783	0.178664	0.310435	0	0.237627	Inf	0.0485938	1	UP
circRNA.11569	8:445432|509712(+)	exon	ENSRNOG00000029876(Gucy1a2:guanylate cyclase 1, soluble, alpha 2 [Source:RGD Symbol;Acc:621655]),	0	0	0	0.223783	0.357329	0.310435	0	0.297182	Inf	0.0136534	1	UP
circRNA.11617	8:52127636|52158205(+)	exon	ENSRNOG00000018778(Cadm1:cell adhesion molecule 1 [Source:RGD Symbol;Acc:1310999]),	1.74572	0	0	0	0	0	0.581906	0	#NAME?	0.024622	1	DOWN
circRNA.11659	8:59035184|59053541(-)	exon	ENSRNOG00000009170(Dmxl2:Dmx-like 2 [Source:RGD Symbol;Acc:1586163]),	0	0	0	0.223783	0.267997	0.310435	0	0.267405	Inf	0.0255485	1	UP
circRNA.11664	8:59050282|59056386(-)	exon	ENSRNOG00000009170(Dmxl2:Dmx-like 2 [Source:RGD Symbol;Acc:1586163]),	0.581906	0.46597	0.632168	0.149188	0	0.232826	0.560015	0.127338	-2.1368	0.0112584	1	DOWN
circRNA.11696	8:60917720|60920949(-)	exon	ENSRNOG00000042519(Peak1:pseudopodium-enriched atypical kinase 1 [Source:RGD Symbol;Acc:1312026]),	0	0	0	0.298377	0.267997	0.155218	0	0.24053	Inf	0.0480678	1	UP
circRNA.12093	9:112023471|112027242(-)	intergenic_region	n/a	0.145477	0	0	0.298377	0.357329	0.388044	0.0484922	0.347917	2.84292	0.0430508	1	UP
circRNA.1222	12:37641425|37641929(+)	exon	ENSRNOG00000001064(Sbno1:strawberry notch homolog 1 (Drosophila) [Source:RGD Symbol;Acc:1310005]),	0.363691	0.232985	0.140482	0	0	0	0.245719	0	#NAME?	0.035421	1	DOWN
circRNA.12386	9:53129625|53155776(+)	exon	ENSRNOG00000004076(Pms1:postmeiotic segregation increased 1 (S. cerevisiae) [Source:RGD Symbol;Acc:1359511]),	0.727383	0.698955	0.632168	1.79026	1.96531	1.16413	0.686169	1.6399	1.25697	0.00755382	1	UP
circRNA.12506	9:69940437|69942486(-)	exon	ENSRNOG00000011849(Ndufs1:NADH dehydrogenase (ubiquinone) Fe-S protein 1 [Source:RGD Symbol;Acc:1359670]),	0	0	0	0.372971	0.178664	0.232826	0	0.261487	Inf	0.0311334	1	UP
circRNA.12574	9:8350080|8421978(+)	intron	ENSRNOG00000048686(LOC100360856:hypothetical protein LOC100360856 [Source:RGD Symbol;Acc:2321302]),	0	0.543632	0.632168	0.895131	1.42931	1.31935	0.391933	1.2146	1.6318	0.0388917	1	UP
circRNA.1265	12:44761634|44762147(-)	exon	ENSRNOG00000028630(Ksr2:kinase suppressor of ras 2 [Source:RGD Symbol;Acc:1562674]),	0.581906	0.93194	1.19409	0.223783	0.267997	0.465653	0.902647	0.319144	-1.49995	0.0125847	1	DOWN
circRNA.12843	X:33991806|34057425(+)	intergenic_region	n/a	0	0	0	0.298377	0.80399	0	0	0.367455	Inf	0.0287224	1	UP
circRNA.12913	X:63177769|63182385(-)	exon	ENSRNOG00000005624(Zfx:zinc finger protein X-linked [Source:RGD Symbol;Acc:1562664]),	0.945598	0.93194	0.491686	3.35674	1.25065	1.31935	0.789741	1.97558	1.32282	0.0378545	1	UP
circRNA.12939	X:68338536|68352920(-)	exon	ENSRNOG00000026573(Ophn1:oligophrenin 1 [Source:RGD Symbol;Acc:1563435]),	0.218215	0.232985	0.421445	0	0	0	0.290882	0	#NAME?	0.0110099	1	DOWN
circRNA.1325	12:9061581|9062262(+)	exon	ENSRNOG00000000940(Flt1:FMS-related tyrosine kinase 1 [Source:RGD Symbol;Acc:2621]),	0.509168	0.155323	0.140482	0	0	0	0.268324	0	#NAME?	0.0288228	1	DOWN
circRNA.1606	13:60462943|60484400(-)	exon	ENSRNOG00000003258(Cdc73:cell division cycle 73 [Source:RGD Symbol;Acc:1311766]),	0	0	0.351204	0.895131	1.07199	0.388044	0.117068	0.785054	2.74544	0.0122676	1	UP
circRNA.1835	13:95230647|95348984(-)	intergenic_region	n/a	0.509168	0.155323	0.351204	0	0.178664	0	0.338565	0.0595548	-2.50714	0.0468693	1	DOWN
circRNA.1875	14:104942288|104946182(-)	exon	ENSRNOG00000005411(Aftph:aftiphilin [Source:RGD Symbol;Acc:1311920]),	0.218215	0.155323	0.351204	0	0	0	0.241581	0	#NAME?	0.0356674	1	DOWN
circRNA.1912	14:108013275|108020828(+)	exon	ENSRNOG00000009935(Xpo1:exportin 1 [Source:RGD Symbol;Acc:620517]),	0.145477	0.155323	0	0.671348	0.625325	0.543262	0.100267	0.613312	2.61278	0.00314703	1	UP
circRNA.2144	14:4178531|4198845(+)	exon	ENSRNOG00000002112(Zfp644:zinc finger protein 644 [Source:RGD Symbol;Acc:1306805]),	0	0	0	0.52216	0.357329	0.155218	0	0.344902	Inf	0.00786814	1	UP
circRNA.2512	15:19620758|19636174(-)	exon	ENSRNOG00000006462(Ero1l:ERO1-like (S. cerevisiae) [Source:RGD Symbol;Acc:621713]),	0	0.232985	0	0.447565	0.267997	0.698479	0.0776617	0.471347	2.60151	0.0258726	1	UP
circRNA.2534	15:25320488|25335135(+)	exon	ENSRNOG00000013353(Tmem260:transmembrane protein 260 [Source:RGD Symbol;Acc:1562018]),	0.43643	0.155323	0.351204	0	0	0	0.314319	0	#NAME?	0.00744633	1	DOWN
circRNA.287	10:5127520|5164435(-)	exon	ENSRNOG00000057378(Clec16a:C-type lectin domain family 16, member A [Source:MGI Symbol;Acc:MGI:1921624]),	0	0	0	0.223783	0.267997	0.232826	0	0.241535	Inf	0.0436226	1	UP
circRNA.3365	17:53483964|53502778(+)	exon	ENSRNOG00000016046(Hecw1:HECT, C2 and WW domain containing E3 ubiquitin protein ligase 1 [Source:RGD Symbol;Acc:1561038]),	0	0	0	0.372971	0.446661	0.232826	0	0.350819	Inf	0.00501379	1	UP
circRNA.3501	17:66241696|66243020(-)	exon	ENSRNOG00000017593(Mtr:5-methyltetrahydrofolate-homocysteine methyltransferase [Source:RGD Symbol;Acc:621283]),	0	0	0	0.298377	0.178664	0.310435	0	0.262492	Inf	0.0289029	1	UP
circRNA.3561	17:76245627|76265943(-)	exon	ENSRNOG00000023593(Upf2:UPF2 regulator of nonsense transcripts homolog (yeast) [Source:RGD Symbol;Acc:1309178]),	3.05501	0	0	0	0	0	1.01834	0	#NAME?	0.00870319	1	DOWN
circRNA.3678	17:9875749|9929565(-)	exon	ENSRNOG00000016680(Nsd1:nuclear receptor binding SET domain protein 1 [Source:RGD Symbol;Acc:1307748]),	0.363691	0.155323	0.210723	0	0	0	0.243246	0	#NAME?	0.0355026	1	DOWN
circRNA.376	10:61882916|61885796(+)	exon	ENSRNOG00000003041(Smg6:SMG6 nonsense mediated mRNA decay factor [Source:RGD Symbol;Acc:1595918]),	0	0	0	0.372971	0.535993	0.310435	0	0.406466	Inf	0.00122738	1	UP
circRNA.3762	18:2005294|2032491(+)	exon	ENSRNOG00000013281(Mib1:mindbomb E3 ubiquitin protein ligase 1 [Source:RGD Symbol;Acc:1307195]),	0.43643	0.46597	0.140482	0	0	0	0.347627	0	#NAME?	0.00512033	1	DOWN
circRNA.42	10:110680099|110690679(+)	exon	ENSRNOG00000036658(Tbcd:tubulin folding cofactor D [Source:RGD Symbol;Acc:2320148]),	0	0	0	0.596754	0.178664	0.232826	0	0.336082	Inf	0.00938927	1	UP
circRNA.4543	1:120860173|121017638(-)	intergenic_region	n/a	0	0	0	0.298377	0.893322	0.310435	0	0.500711	Inf	0.000510086	1	UP
circRNA.466	10:70163790|70172741(-)	exon	ENSRNOG00000007596(Rffl:ring finger and FYVE-like domain containing E3 ubiquitin protein ligase [Source:RGD Symbol;Acc:727916]),	0	0	0	0	0	1.39696	0	0.465653	Inf	0.0400115	1	UP
circRNA.467	10:70167431|70172741(-)	exon	ENSRNOG00000007596(Rffl:ring finger and FYVE-like domain containing E3 ubiquitin protein ligase [Source:RGD Symbol;Acc:727916]),	0	0	0	0	0	4.19088	0	1.39696	Inf	0.00507073	1	UP
circRNA.4677	1:144154619|144177718(+)	exon	ENSRNOG00000019776(Sh3gl3:SH3-domain GRB2-like 3 [Source:RGD Symbol;Acc:620578]),	0.218215	0	0	0.596754	0.178664	0.543262	0.0727383	0.43956	2.59527	0.0390979	1	UP
circRNA.4760	1:163203870|163216364(-)	exon	ENSRNOG00000036866(Acer3:alkaline ceramidase 3 [Source:RGD Symbol;Acc:1561254]),	0.363691	0.46597	0.561927	1.41729	1.16132	0.931306	0.463863	1.16997	1.3347	0.00961624	1	UP
circRNA.4958	1:194915054|194917768(-)	intergenic_region	n/a	0	0	0	0.52216	0.982654	0	0	0.501604	Inf	0.006009	1	UP
circRNA.4990	1:195657722|195840151(-)	intergenic_region	n/a	1.01834	0.698955	0.84289	0	0.535993	0	0.853394	0.178664	-2.25596	0.0177138	1	DOWN
circRNA.5153	1:221065774|221067559(-)	exon	ENSRNOG00000056038(Ehbp1l1:EH domain binding protein 1-like 1 [Source:MGI Symbol;Acc:MGI:3612340]),	0.145477	0.388308	0.351204	0	0	0	0.294996	0	#NAME?	0.0119769	1	DOWN
circRNA.5177	1:225019523|225021984(+)	exon	ENSRNOG00000019507(Hnrnpul2:heterogeneous nuclear ribonucleoprotein U-like 2 [Source:RGD Symbol;Acc:1562784]),	0.290953	0.232985	0.280963	0	0	0	0.268301	0	#NAME?	0.0157534	1	DOWN
circRNA.5213	1:235737499|235761819(-)	exon	ENSRNOG00000025539(Vps13a:vacuolar protein sorting 13 homolog A (S. cerevisiae) [Source:RGD Symbol;Acc:1311340]),	0	0	0	0.298377	0.267997	0.155218	0	0.24053	Inf	0.0482802	1	UP
circRNA.544	10:74338952|74360926(-)	exon	ENSRNOG00000060561(Gdpd1:glycerophosphodiester phosphodiesterase domain containing 1 [Source:RGD Symbol;Acc:1311813]),	0.363691	0.155323	0	0.745942	0.714657	0.543262	0.173005	0.667954	1.94894	0.0246721	1	UP
circRNA.5476	1:278679022|278749829(+)	exon	ENSRNOG00000017406(Atrnl1:attractin like 1 [Source:RGD Symbol;Acc:1563485]),	3.34596	2.17453	3.4418	5.2216	5.62793	7.37284	2.98743	6.07412	1.02377	0.0018631	1	UP
circRNA.551	10:74467237|74490078(+)	exon	ENSRNOG00000006248(Trim37:tripartite motif-containing 37 [Source:RGD Symbol;Acc:1308349]),	0	0	0	0.149188	0.267997	0.465653	0	0.294279	Inf	0.0195314	1	UP
circRNA.5642	1:62472136|62534546(-)	intergenic_region	n/a	0	0.388308	0.632168	0	0	0	0.340159	0	#NAME?	0.0247276	1	DOWN
circRNA.5749	1:91873487|91883284(+)	exon	ENSRNOG00000052814(Ankrd27:ankyrin repeat domain 27 (VPS9 domain) [Source:RGD Symbol;Acc:1307106]),	0.363691	0	0	0.52216	0.625325	0.543262	0.12123	0.563582	2.21687	0.0445993	1	UP
circRNA.59	10:13931236|13935484(+)	exon	ENSRNOG00000010771(Pkd1:polycystic kidney disease 1 [Source:RGD Symbol;Acc:3333]),	0.727383	0.232985	0.491686	0.149188	0.178664	0	0.484018	0.109284	-2.14697	0.0259744	1	DOWN
circRNA.5935	20:46008693|46023669(-)	exon	ENSRNOG00000000312(Fig4:FIG4 phosphoinositide 5-phosphatase [Source:RGD Symbol;Acc:1311375]),	0	0	0	0.52216	0.625325	0	0	0.382495	Inf	0.0186553	1	UP
circRNA.5993	20:6758246|6758773(-)	exon	ENSRNOG00000000487(Grm4:glutamate receptor, metabotropic 4 [Source:RGD Symbol;Acc:2745]),	0	0	0	0.223783	0.357329	0.232826	0	0.271313	Inf	0.0258118	1	UP
circRNA.5999	20:8006289|8019015(-)	exon	ENSRNOG00000022523(Fkbp5:FK506 binding protein 5 [Source:RGD Symbol;Acc:1309155]),	0	0	0	0.52216	0.267997	0.388044	0	0.392733	Inf	0.00163945	1	UP
circRNA.6025	2:109802012|109815644(-)	intergenic_region	n/a	0	0	0	0.223783	0.267997	0.232826	0	0.241535	Inf	0.0435278	1	UP
circRNA.6041	2:113739689|113745181(+)	exon	ENSRNOG00000028156(Pld1:phospholipase D1 [Source:RGD Symbol;Acc:3349]),	0	0	0	0.52216	0.357329	0.155218	0	0.344902	Inf	0.00784705	1	UP
circRNA.6054	2:116070154|116081913(+)	exon	ENSRNOG00000009491(Phc3:polyhomeotic homolog 3 (Drosophila) [Source:RGD Symbol;Acc:1307998]),	0.363691	0.155323	0.561927	0	0.178664	0	0.360314	0.0595548	-2.59697	0.0454222	1	DOWN
circRNA.6098	2:123576589|123600232(+)	exon	ENSRNOG00000038436(RGD1307100:similar to RIKEN cDNA D630029K19 [Source:RGD Symbol;Acc:1307100]),	0	0	0	0.149188	0.267997	0.310435	0	0.24254	Inf	0.0478409	1	UP
circRNA.6256	2:154330160|154343682(-)	exon	ENSRNOG00000009955(Plch1:phospholipase C, eta 1 [Source:RGD Symbol;Acc:1561991]),	0.43643	0.46597	0.561927	0	0.178664	0.310435	0.488109	0.163033	-1.58204	0.0460578	1	DOWN
circRNA.6384	2:188269009|188301124(+)	exon	ENSRNOG00000020386(Ash1l:ash1 (absent, small, or homeotic)-like (Drosophila) [Source:RGD Symbol;Acc:1306350]),	0	0	0.210723	0.671348	0.80399	0.155218	0.0702409	0.543518	2.95195	0.0223188	1	UP
circRNA.6404	2:188378866|188380644(+)	exon	ENSRNOG00000020386(Ash1l:ash1 (absent, small, or homeotic)-like (Drosophila) [Source:RGD Symbol;Acc:1306350]),	0	0	0	0.298377	0.267997	0.155218	0	0.24053	Inf	0.0481757	1	UP
circRNA.6494	2:206563072|206570833(-)	exon	ENSRNOG00000019885(Magi3:membrane associated guanylate kinase, WW and PDZ domain containing 3 [Source:RGD Symbol;Acc:621362]),	0.581906	0.310647	0	0	0	0	0.297518	0	#NAME?	0.0453611	1	DOWN
circRNA.6575	2:219920037|219959360(-)	exon	ENSRNOG00000016878(Lppr5:lipid phosphate phosphatase-related protein type 5 [Source:RGD Symbol;Acc:1309567]),	0	0	0	0.298377	0.178664	0.388044	0	0.288362	Inf	0.017072	1	UP
circRNA.6796	2:28986099|29006321(-)	exon	ENSRNOG00000015334(Fcho2:FCH domain only 2 [Source:RGD Symbol;Acc:1565396]),	0	0	0	0.223783	0.357329	0.232826	0	0.271313	Inf	0.0257508	1	UP
circRNA.6875	2:35754082|35766354(-)	exon	ENSRNOG00000043329(Rnf180:ring finger protein 180 [Source:RGD Symbol;Acc:1595064]),	0	0	0	0.372971	0.357329	0.232826	0	0.321042	Inf	0.00797521	1	UP
circRNA.6954	2:50399455|50429941(+)	exon	ENSRNOG00000055382(Hcn1:hyperpolarization-activated cyclic nucleotide-gated potassium channel 1 [Source:RGD Symbol;Acc:620688]),	0.145477	0.310647	0.491686	0	0	0	0.315936	0	#NAME?	0.00856407	1	DOWN
circRNA.6976	2:55006009|55040803(+)	intergenic_region	n/a	0	0	0.140482	0.372971	0.267997	0.388044	0.0468272	0.343004	2.8728	0.0474899	1	UP
circRNA.7039	2:69589316|69591756(+)	exon	ENSRNOG00000009771(Cdh10:cadherin 10 [Source:RGD Symbol;Acc:619741]),	0.145477	0.388308	0.561927	0	0.178664	0	0.365237	0.0595548	-2.61654	0.0368206	1	DOWN
circRNA.7079	2:89498122|89498400(-)	intergenic_region	n/a	0.727383	0.776617	0.913131	0.298377	0.446661	0	0.80571	0.248346	-1.69791	0.0121719	1	DOWN
circRNA.7086	2:93460344|93495152(-)	intergenic_region	n/a	1.09107	1.0096	1.12385	0.596754	0.535993	0.388044	1.07484	0.50693	-1.08427	0.0147156	1	DOWN
circRNA.7132	3:104980955|104984877(+)	exon	ENSRNOG00000031760(Fmn1:formin 1 [Source:MGI Symbol;Acc:MGI:101815]),	0	0	0	0	0	3.02674	0	1.00891	Inf	0.00917808	1	UP
circRNA.7605	3:23046581|23065045(-)	exon	ENSRNOG00000013232(Nr6a1:nuclear receptor subfamily 6, group A, member 1 [Source:RGD Symbol;Acc:1564740]),	0	0	0	0.223783	0.357329	0.232826	0	0.271313	Inf	0.0257022	1	UP
circRNA.763	11:20634697|20650229(+)	exon	ENSRNOG00000002126(Ncam2:neural cell adhesion molecule 2 [Source:RGD Symbol;Acc:1303131]),	0.218215	0.543632	0.77265	0.223783	0.178664	0	0.511499	0.134149	-1.93089	0.0367613	1	DOWN
circRNA.7668	3:3399474|3414759(-)	exon	ENSRNOG00000017883(Camsap1:calmodulin regulated spectrin-associated protein 1 [Source:RGD Symbol;Acc:1565022]),	0.145477	0	0	0.52216	0.446661	0.388044	0.0484922	0.452288	3.22142	0.0061008	1	UP
circRNA.7701	3:45086410|45133351(-)	exon	ENSRNOG00000057740(Ccdc148:Ccdc148 protein; Protein Ccdc148 [Source:UniProtKB/TrEMBL;Acc:B2RZ45]),	0	0.155323	0	0.447565	0.446661	0.543262	0.0517745	0.479163	3.2102	0.00381763	1	UP
circRNA.8079	4:132024754|132094750(-)	intergenic_region	n/a	0.290953	0.621293	0	0	0	0	0.304082	0	#NAME?	0.0441986	1	DOWN
circRNA.8285	4:175993870|176182847(-)	intergenic_region	n/a	0.290953	0.388308	0.421445	0	0	0	0.366902	0	#NAME?	0.00144051	1	DOWN
circRNA.8295	4:177416623|177436364(+)	exon	ENSRNOG00000014856(Etnk1:ethanolamine kinase 1 [Source:RGD Symbol;Acc:1308204]),	0	0.155323	0	0.447565	0.446661	0.388044	0.0517745	0.427423	3.04535	0.00997831	1	UP
circRNA.839	11:34879058|34940932(+)	exon	ENSRNOG00000001662(Dyrk1a:dual-specificity tyrosine-(Y)-phosphorylation regulated kinase 1A [Source:RGD Symbol;Acc:2528]),	0	0	0	0.52216	0.357329	0.310435	0	0.396641	Inf	0.00139656	1	UP
circRNA.8439	4:31055983|31066896(+)	exon	ENSRNOG00000009700(Dync1i1:dynein cytoplasmic 1 intermediate chain 1 [Source:RGD Symbol;Acc:2512]),	0	0	0	0.372971	0.267997	0.155218	0	0.265395	Inf	0.030672	1	UP
circRNA.8601	4:632256|670536(+)	exon	ENSRNOG00000006718(Rbm33:RNA binding motif protein 33 [Source:RGD Symbol;Acc:1310651]),	0.145477	0.232985	0.351204	0	0	0	0.243222	0	#NAME?	0.0352391	1	DOWN
circRNA.8994	5:128327978|128330004(-)	exon	ENSRNOG00000027183(Zfyve9:zinc finger, FYVE domain containing 9 [Source:RGD Symbol;Acc:1310856]),	0.145477	0.155323	0.210723	0.895131	1.25065	0.155218	0.170508	0.767	2.16939	0.0272761	1	UP
circRNA.9004	5:128678699|128681202(+)	exon	ENSRNOG00000007111(Nrd1:nardilysin 1 [Source:RGD Symbol;Acc:3210]),	1.30929	0.776617	1.26434	0.596754	0	0.465653	1.11675	0.354136	-1.65693	0.0204421	1	DOWN
circRNA.9282	5:16385268|16409710(-)	intron	ENSRNOG00000008872(Tmem68:transmembrane protein 68 [Source:RGD Symbol;Acc:1309006]),	0	0.621293	0.280963	0	0	0	0.300752	0	#NAME?	0.0448644	1	DOWN
circRNA.9370	5:2257913|2314821(+)	intergenic_region	n/a	0	0	3.23108	0	0	0	1.07703	0	#NAME?	0.00752367	1	DOWN
circRNA.9658	5:90818736|90880617(+)	exon	ENSRNOG00000006644(Kdm4c:lysine (K)-specific demethylase 4C [Source:RGD Symbol;Acc:1307528]),	5.23716	0	0	0	0	0	1.74572	0	#NAME?	0.00363599	1	DOWN
