# Supplementary material for: LncRNAs down-regulate Myh1, Casr, and Mis18a expression in the Substantia Nigra of aged male rats
Source: Aging (Albany NY). 2019 Oct 2;11(19):8313–28. doi: 10.18632/aging.102321 (PMC6814601; doi:10.18632/aging.102321)
Supplement: Supplementary Table 4 [file aging-11-102321-s002.xlsx]

## Sheet: Table 4
lncRNA_id	Releation_label	Strand
ENSRNOT00000076715	bidirectional	+
ENSRNOT00000090050	bidirectional	-
NONRATT019976.2	bidirectional	+
MSTRG.12069.2	exonic_antisense	+
MSTRG.12069.7	exonic_antisense	+
MSTRG.12069.9	exonic_antisense	+
MSTRG.12070.1	exonic_antisense	+
MSTRG.12072.1	exonic_antisense	+
MSTRG.17229.10	exonic_antisense	-
NONRATT000490.2	exonic_antisense	-
NONRATT010417.2	exonic_antisense	-
NONRATT000382.2	exonic_sense	+
NONRATT000541.2	exonic_sense	+
NONRATT000579.2	exonic_sense	+
NONRATT000761.2	exonic_sense	+
NONRATT001649.2	exonic_sense	+
NONRATT002035.2	exonic_sense	-
NONRATT002769.2	exonic_sense	-
NONRATT002864.2	exonic_sense	-
NONRATT002918.2	exonic_sense	-
NONRATT003558.2	exonic_sense	-
NONRATT004037.2	exonic_sense	+
NONRATT004060.2	exonic_sense	+
NONRATT004578.2	exonic_sense	+
NONRATT004982.2	exonic_sense	+
NONRATT005011.2	exonic_sense	+
NONRATT005284.2	exonic_sense	-
NONRATT005366.2	exonic_sense	-
NONRATT005404.2	exonic_sense	-
NONRATT005749.2	exonic_sense	+
NONRATT005910.2	exonic_sense	-
NONRATT006049.2	exonic_sense	-
NONRATT006242.2	exonic_sense	-
NONRATT006714.2	exonic_sense	+
NONRATT007029.2	exonic_sense	-
NONRATT007039.2	exonic_sense	-
NONRATT007148.2	exonic_sense	-
NONRATT007879.2	exonic_sense	-
NONRATT008555.2	exonic_sense	+
NONRATT009419.2	exonic_sense	+
NONRATT009831.2	exonic_sense	-
NONRATT012419.2	exonic_sense	+
NONRATT013324.2	exonic_sense	+
NONRATT013451.2	exonic_sense	+
NONRATT014176.2	exonic_sense	+
NONRATT014382.2	exonic_sense	+
NONRATT014518.2	exonic_sense	-
NONRATT015195.2	exonic_sense	+
NONRATT016159.2	exonic_sense	-
NONRATT016788.2	exonic_sense	-
NONRATT016848.2	exonic_sense	-
NONRATT017137.2	exonic_sense	+
NONRATT017723.2	exonic_sense	-
NONRATT018272.2	exonic_sense	+
NONRATT018312.2	exonic_sense	+
NONRATT018597.2	exonic_sense	+
NONRATT019160.2	exonic_sense	-
NONRATT019503.2	exonic_sense	-
NONRATT019532.2	exonic_sense	-
NONRATT019577.2	exonic_sense	-
NONRATT020543.2	exonic_sense	+
NONRATT021062.2	exonic_sense	+
NONRATT021122.2	exonic_sense	-
NONRATT021357.2	exonic_sense	-
NONRATT021436.2	exonic_sense	-
NONRATT021671.2	exonic_sense	-
NONRATT021706.2	exonic_sense	-
NONRATT021928.2	exonic_sense	-
NONRATT021930.2	exonic_sense	-
NONRATT022629.2	exonic_sense	+
NONRATT023144.2	exonic_sense	-
NONRATT023334.2	exonic_sense	-
NONRATT023570.2	exonic_sense	-
NONRATT023980.2	exonic_sense	+
NONRATT024063.2	exonic_sense	+
NONRATT024378.2	exonic_sense	+
NONRATT024385.2	exonic_sense	+
NONRATT024648.2	exonic_sense	+
NONRATT025198.2	exonic_sense	+
NONRATT025209.2	exonic_sense	+
NONRATT025255.2	exonic_sense	-
NONRATT025796.2	exonic_sense	+
NONRATT026298.2	exonic_sense	+
NONRATT027255.2	exonic_sense	-
NONRATT027313.2	exonic_sense	-
NONRATT027438.2	exonic_sense	+
NONRATT028173.2	exonic_sense	+
NONRATT028419.2	exonic_sense	-
NONRATT028621.2	exonic_sense	+
NONRATT028679.2	exonic_sense	-
NONRATT029038.2	exonic_sense	-
NONRATT029471.2	exonic_sense	-
NONRATT030073.2	exonic_sense	-
NONRATT030892.2	exonic_sense	-
NONRATT031066.2	exonic_sense	-
NONRATT031141.2	exonic_sense	-
ENSRNOT00000080938	intergenic	.
ENSRNOT00000089548	intergenic	.
MSTRG.10046.1	intergenic	.
MSTRG.10073.2	intergenic	.
MSTRG.10447.10	intergenic	.
MSTRG.10447.38	intergenic	.
MSTRG.11163.4	intergenic	.
MSTRG.11222.3	intergenic	.
MSTRG.11809.5	intergenic	.
MSTRG.11973.10	intergenic	.
MSTRG.12068.1	intergenic	.
MSTRG.12074.1	intergenic	.
MSTRG.12075.1	intergenic	.
MSTRG.12077.1	intergenic	.
MSTRG.12463.1	intergenic	.
MSTRG.14559.1	intergenic	.
MSTRG.14950.2	intergenic	.
MSTRG.15536.2	intergenic	.
MSTRG.1647.9	intergenic	.
MSTRG.1652.4	intergenic	.
MSTRG.17544.5	intergenic	.
MSTRG.18740.3	intergenic	.
MSTRG.18846.24	intergenic	.
MSTRG.18871.2	intergenic	.
MSTRG.18964.9	intergenic	.
MSTRG.2206.8	intergenic	.
MSTRG.22359.4	intergenic	.
MSTRG.22389.27	intergenic	.
MSTRG.23045.2	intergenic	.
MSTRG.23080.3	intergenic	.
MSTRG.25936.3	intergenic	.
MSTRG.27435.1	intergenic	.
MSTRG.28613.1	intergenic	.
MSTRG.3738.31	intergenic	.
MSTRG.3767.2	intergenic	.
MSTRG.3954.2	intergenic	.
MSTRG.3969.2	intergenic	.
MSTRG.5734.17	intergenic	.
MSTRG.6543.7	intergenic	.
MSTRG.7018.3	intergenic	.
MSTRG.7204.10	intergenic	.
NONRATT000231.2	intergenic	.
NONRATT010755.2	intergenic	.
NONRATT011307.2	intergenic	.
NONRATT015040.2	intergenic	.
NONRATT021136.2	intergenic	.
NONRATT021997.2	intergenic	.
NONRATT024220.2	intergenic	.
NONRATT025089.2	intergenic	.
MSTRG.16397.11	intronic_antisense	+
MSTRG.20487.1	intronic_antisense	-
MSTRG.12164.2	intronic_sense	-
MSTRG.14331.2	intronic_sense	+
MSTRG.15011.1	intronic_sense	-
MSTRG.18145.1	intronic_sense	-
MSTRG.18145.2	intronic_sense	-
MSTRG.1948.2	intronic_sense	+
MSTRG.24456.3	intronic_sense	-
MSTRG.24823.1	intronic_sense	-
MSTRG.24823.2	intronic_sense	-
MSTRG.24823.4	intronic_sense	-
MSTRG.25393.1	intronic_sense	-
MSTRG.26293.6	intronic_sense	+
MSTRG.3747.3	intronic_sense	-
MSTRG.4165.1	intronic_sense	+
MSTRG.7892.2	intronic_sense	-
NONRATT015586.2	intronic_sense	+
