# Supplementary material for: LncRNAs down-regulate Myh1, Casr, and Mis18a expression in the Substantia Nigra of aged male rats
Source: Aging (Albany NY). 2019 Oct 2;11(19):8313–28. doi: 10.18632/aging.102321 (PMC6814601; doi:10.18632/aging.102321)
Supplement: Supplementary Table 5 [file aging-11-102321-s004.xlsx]

## Sheet: Table 5
circRNA_id	locus	circRNA_type
circRNA.4953	1:194864350|194917768(-)	intergenic_region
circRNA.6450	2:197906758|197913548(-)	exon
circRNA.2908	16:23555922|23600154(+)	exon
circRNA.11063	7:74258330|74259380(+)	intergenic_region
circRNA.10007	6:135672583|135696475(+)	exon
circRNA.10101	6:22373412|22407626(+)	exon
circRNA.10131	6:27573046|27582987(-)	exon
circRNA.10300	6:57704067|57739022(+)	exon
circRNA.10406	6:76455340|76492176(-)	exon
circRNA.1058	11:86824053|86831108(+)	exon
circRNA.10761	7:18533478|18535599(-)	exon
circRNA.10803	7:28987514|28990116(+)	exon
circRNA.10863	7:32955133|32982696(-)	intergenic_region
circRNA.11078	7:76229137|76229533(-)	exon
circRNA.11080	7:76749977|76786263(-)	intergenic_region
circRNA.11172	7:93434909|93436345(-)	intron
circRNA.11265	8:109044546|109216053(+)	exon
circRNA.11569	8:445432|509712(+)	exon
circRNA.11617	8:52127636|52158205(+)	exon
circRNA.11659	8:59035184|59053541(-)	exon
circRNA.11664	8:59050282|59056386(-)	exon
circRNA.11696	8:60917720|60920949(-)	exon
circRNA.12093	9:112023471|112027242(-)	intergenic_region
circRNA.1222	12:37641425|37641929(+)	exon
circRNA.12386	9:53129625|53155776(+)	exon
circRNA.12506	9:69940437|69942486(-)	exon
circRNA.12574	9:8350080|8421978(+)	intron
circRNA.1265	12:44761634|44762147(-)	exon
circRNA.12843	X:33991806|34057425(+)	intergenic_region
circRNA.12913	X:63177769|63182385(-)	exon
circRNA.12939	X:68338536|68352920(-)	exon
circRNA.1325	12:9061581|9062262(+)	exon
circRNA.1606	13:60462943|60484400(-)	exon
circRNA.1835	13:95230647|95348984(-)	intergenic_region
circRNA.1875	14:104942288|104946182(-)	exon
circRNA.1912	14:108013275|108020828(+)	exon
circRNA.2144	14:4178531|4198845(+)	exon
circRNA.2512	15:19620758|19636174(-)	exon
circRNA.2534	15:25320488|25335135(+)	exon
circRNA.287	10:5127520|5164435(-)	exon
circRNA.3365	17:53483964|53502778(+)	exon
circRNA.3501	17:66241696|66243020(-)	exon
circRNA.3561	17:76245627|76265943(-)	exon
circRNA.3678	17:9875749|9929565(-)	exon
circRNA.376	10:61882916|61885796(+)	exon
circRNA.3762	18:2005294|2032491(+)	exon
circRNA.42	10:110680099|110690679(+)	exon
circRNA.4543	1:120860173|121017638(-)	intergenic_region
circRNA.466	10:70163790|70172741(-)	exon
circRNA.467	10:70167431|70172741(-)	exon
circRNA.4677	1:144154619|144177718(+)	exon
circRNA.4760	1:163203870|163216364(-)	exon
circRNA.4958	1:194915054|194917768(-)	intergenic_region
circRNA.4990	1:195657722|195840151(-)	intergenic_region
circRNA.5153	1:221065774|221067559(-)	exon
circRNA.5177	1:225019523|225021984(+)	exon
circRNA.5213	1:235737499|235761819(-)	exon
circRNA.544	10:74338952|74360926(-)	exon
circRNA.5476	1:278679022|278749829(+)	exon
circRNA.551	10:74467237|74490078(+)	exon
circRNA.5642	1:62472136|62534546(-)	intergenic_region
circRNA.5749	1:91873487|91883284(+)	exon
circRNA.59	10:13931236|13935484(+)	exon
circRNA.5935	20:46008693|46023669(-)	exon
circRNA.5993	20:6758246|6758773(-)	exon
circRNA.5999	20:8006289|8019015(-)	exon
circRNA.6025	2:109802012|109815644(-)	intergenic_region
circRNA.6041	2:113739689|113745181(+)	exon
circRNA.6054	2:116070154|116081913(+)	exon
circRNA.6098	2:123576589|123600232(+)	exon
circRNA.6256	2:154330160|154343682(-)	exon
circRNA.6384	2:188269009|188301124(+)	exon
circRNA.6404	2:188378866|188380644(+)	exon
circRNA.6494	2:206563072|206570833(-)	exon
circRNA.6575	2:219920037|219959360(-)	exon
circRNA.6796	2:28986099|29006321(-)	exon
circRNA.6875	2:35754082|35766354(-)	exon
circRNA.6954	2:50399455|50429941(+)	exon
circRNA.6976	2:55006009|55040803(+)	intergenic_region
circRNA.7039	2:69589316|69591756(+)	exon
circRNA.7079	2:89498122|89498400(-)	intergenic_region
circRNA.7086	2:93460344|93495152(-)	intergenic_region
circRNA.7132	3:104980955|104984877(+)	exon
circRNA.7605	3:23046581|23065045(-)	exon
circRNA.763	11:20634697|20650229(+)	exon
circRNA.7668	3:3399474|3414759(-)	exon
circRNA.7701	3:45086410|45133351(-)	exon
circRNA.8079	4:132024754|132094750(-)	intergenic_region
circRNA.8285	4:175993870|176182847(-)	intergenic_region
circRNA.8295	4:177416623|177436364(+)	exon
circRNA.839	11:34879058|34940932(+)	exon
circRNA.8439	4:31055983|31066896(+)	exon
circRNA.8601	4:632256|670536(+)	exon
circRNA.8994	5:128327978|128330004(-)	exon
circRNA.9004	5:128678699|128681202(+)	exon
circRNA.9282	5:16385268|16409710(-)	intron
circRNA.9370	5:2257913|2314821(+)	intergenic_region
circRNA.9658	5:90818736|90880617(+)	exon
