# Supplementary material for: LncRNAs down-regulate Myh1, Casr, and Mis18a expression in the Substantia Nigra of aged male rats
Source: Aging (Albany NY). 2019 Oct 2;11(19):8313–28. doi: 10.18632/aging.102321 (PMC6814601; doi:10.18632/aging.102321)
Supplement: Supplementary Table 6 [file aging-11-102321-s005.xlsx]

## Sheet: Table 6
levels	GO_id	Term	GO_namespace	gene_num	gene_list
2	GO:0007610	behavior	biological_process	4	ENSRNOG00000002265,ENSRNOG00000018735,ENSRNOG00000020369,ENSRNOG00000004632,
2	GO:0005488	binding	molecular_function	71	ENSRNOG00000025094,ENSRNOG00000042220,ENSRNOG00000001627,ENSRNOG00000003357,ENSRNOG00000034174,ENSRNOG00000020845,ENSRNOG00000020246,ENSRNOG00000046834,ENSRNOG00000014653,ENSRNOG00000020400,ENSRNOG00000048297,ENSRNOG00000001224,ENSRNOG00000026177,ENSRNOG00000013973,ENSRNOG00000006010,ENSRNOG00000029386,ENSRNOG00000031211,ENSRNOG00000015368,ENSRNOG00000000451,ENSRNOG00000005695,ENSRNOG00000053332,…
2	GO:0022610	biological adhesion	biological_process	16	ENSRNOG00000038835,ENSRNOG00000007664,ENSRNOG00000053332,ENSRNOG00000019728,ENSRNOG00000003537,ENSRNOG00000000451,ENSRNOG00000001627,ENSRNOG00000008816,ENSRNOG00000020246,ENSRNOG00000002776,ENSRNOG00000003357,ENSRNOG00000020369,ENSRNOG00000016294,ENSRNOG00000001224,ENSRNOG00000003897,ENSRNOG00000018735,
2	GO:0065007	biological regulation	biological_process	58	ENSRNOG00000025094,ENSRNOG00000003537,ENSRNOG00000042220,ENSRNOG00000001627,ENSRNOG00000020845,ENSRNOG00000003357,ENSRNOG00000020246,ENSRNOG00000015860,ENSRNOG00000046834,ENSRNOG00000009260,ENSRNOG00000026306,ENSRNOG00000014653,ENSRNOG00000004882,ENSRNOG00000058437,ENSRNOG00000013426,ENSRNOG00000048297,ENSRNOG00000011360,ENSRNOG00000020400,ENSRNOG00000001224,ENSRNOG00000016294,ENSRNOG00000025608,…
2	GO:0003824	catalytic activity	molecular_function	28	ENSRNOG00000004882,ENSRNOG00000005807,ENSRNOG00000021713,ENSRNOG00000002459,ENSRNOG00000002031,ENSRNOG00000022273,ENSRNOG00000032246,ENSRNOG00000060356,ENSRNOG00000022610,ENSRNOG00000011659,ENSRNOG00000017421,ENSRNOG00000015902,ENSRNOG00000015921,ENSRNOG00000025608,ENSRNOG00000026177,ENSRNOG00000013791,ENSRNOG00000031211,ENSRNOG00000028036,ENSRNOG00000008680,ENSRNOG00000049695,ENSRNOG00000011718,…
2	GO:0005623	cell	cellular_component	72	ENSRNOG00000003544,ENSRNOG00000003897,ENSRNOG00000002459,ENSRNOG00000004632,ENSRNOG00000022273,ENSRNOG00000008816,ENSRNOG00000012723,ENSRNOG00000012049,ENSRNOG00000002776,ENSRNOG00000053332,ENSRNOG00000004698,ENSRNOG00000019728,ENSRNOG00000015368,ENSRNOG00000000451,ENSRNOG00000006010,ENSRNOG00000013973,ENSRNOG00000015921,ENSRNOG00000001224,ENSRNOG00000028598,ENSRNOG00000031211,ENSRNOG00000029386,…
2	GO:0030054	cell junction	cellular_component	1	ENSRNOG00000020501,
2	GO:0001906	cell killing	biological_process	1	ENSRNOG00000020369,
2	GO:0044464	cell part	cellular_component	71	ENSRNOG00000002776,ENSRNOG00000012049,ENSRNOG00000012723,ENSRNOG00000008816,ENSRNOG00000053332,ENSRNOG00000004698,ENSRNOG00000000451,ENSRNOG00000015368,ENSRNOG00000019728,ENSRNOG00000003897,ENSRNOG00000003544,ENSRNOG00000022273,ENSRNOG00000002459,ENSRNOG00000004632,ENSRNOG00000020246,ENSRNOG00000009260,ENSRNOG00000034174,ENSRNOG00000020845,ENSRNOG00000005903,ENSRNOG00000042220,ENSRNOG00000025094,…
2	GO:0071840	cellular component organization or biogenesis	biological_process	21	ENSRNOG00000013973,ENSRNOG00000001224,ENSRNOG00000018735,ENSRNOG00000028036,ENSRNOG00000016058,ENSRNOG00000003897,ENSRNOG00000037167,ENSRNOG00000004882,ENSRNOG00000021713,ENSRNOG00000058437,ENSRNOG00000021555,ENSRNOG00000053047,ENSRNOG00000001627,ENSRNOG00000003357,ENSRNOG00000020369,ENSRNOG00000046834,ENSRNOG00000032844,ENSRNOG00000008736,ENSRNOG00000049695,ENSRNOG00000003537,ENSRNOG00000005903,
2	GO:0009987	cellular process	biological_process	75	ENSRNOG00000058437,ENSRNOG00000037167,ENSRNOG00000026306,ENSRNOG00000004882,ENSRNOG00000005807,ENSRNOG00000012995,ENSRNOG00000016058,ENSRNOG00000013791,ENSRNOG00000025608,ENSRNOG00000016294,ENSRNOG00000003537,ENSRNOG00000015860,ENSRNOG00000012843,ENSRNOG00000004865,ENSRNOG00000021555,ENSRNOG00000002031,ENSRNOG00000022610,ENSRNOG00000060356,ENSRNOG00000032246,ENSRNOG00000050325,ENSRNOG00000021713,…
2	GO:0032502	developmental process	biological_process	42	ENSRNOG00000025094,ENSRNOG00000003537,ENSRNOG00000005903,ENSRNOG00000042220,ENSRNOG00000010841,ENSRNOG00000004865,ENSRNOG00000020845,ENSRNOG00000003357,ENSRNOG00000015860,ENSRNOG00000046834,ENSRNOG00000026306,ENSRNOG00000014653,ENSRNOG00000048297,ENSRNOG00000011360,ENSRNOG00000015921,ENSRNOG00000016294,ENSRNOG00000001224,ENSRNOG00000008680,ENSRNOG00000013791,ENSRNOG00000028598,ENSRNOG00000038835,…
2	GO:0005576	extracellular region	cellular_component	27	ENSRNOG00000046834,ENSRNOG00000020369,ENSRNOG00000003357,ENSRNOG00000034174,ENSRNOG00000001627,ENSRNOG00000010841,ENSRNOG00000005903,ENSRNOG00000005695,ENSRNOG00000042860,ENSRNOG00000038835,ENSRNOG00000032844,ENSRNOG00000011718,ENSRNOG00000013791,ENSRNOG00000003897,ENSRNOG00000016058,ENSRNOG00000028036,ENSRNOG00000001865,ENSRNOG00000018735,ENSRNOG00000008680,ENSRNOG00000015902,ENSRNOG00000026177,…
2	GO:0044421	extracellular region part	cellular_component	26	ENSRNOG00000001865,ENSRNOG00000028036,ENSRNOG00000016058,ENSRNOG00000008680,ENSRNOG00000018735,ENSRNOG00000013791,ENSRNOG00000003897,ENSRNOG00000001224,ENSRNOG00000026177,ENSRNOG00000000443,ENSRNOG00000013973,ENSRNOG00000015902,ENSRNOG00000013426,ENSRNOG00000011360,ENSRNOG00000004610,ENSRNOG00000020369,ENSRNOG00000003357,ENSRNOG00000046834,ENSRNOG00000001627,ENSRNOG00000042860,ENSRNOG00000005695,…
2	GO:0040007	growth	biological_process	4	ENSRNOG00000046834,ENSRNOG00000020369,ENSRNOG00000059500,ENSRNOG00000016058,
2	GO:0002376	immune system process	biological_process	28	ENSRNOG00000001224,ENSRNOG00000015921,ENSRNOG00000016294,ENSRNOG00000013973,ENSRNOG00000000443,ENSRNOG00000033215,ENSRNOG00000029386,ENSRNOG00000018735,ENSRNOG00000013794,ENSRNOG00000013791,ENSRNOG00000026989,ENSRNOG00000026306,ENSRNOG00000014653,ENSRNOG00000053047,ENSRNOG00000059500,ENSRNOG00000020369,ENSRNOG00000020845,ENSRNOG00000003357,ENSRNOG00000009260,ENSRNOG00000046834,ENSRNOG00000047706,…
2	GO:0051179	localization	biological_process	23	ENSRNOG00000013794,ENSRNOG00000003897,ENSRNOG00000013791,ENSRNOG00000028598,ENSRNOG00000018735,ENSRNOG00000006010,ENSRNOG00000016294,ENSRNOG00000015921,ENSRNOG00000001224,ENSRNOG00000025608,ENSRNOG00000013973,ENSRNOG00000021555,ENSRNOG00000015972,ENSRNOG00000026306,ENSRNOG00000037167,ENSRNOG00000002265,ENSRNOG00000015860,ENSRNOG00000046834,ENSRNOG00000003357,ENSRNOG00000004865,ENSRNOG00000030726,…
2	GO:0040011	locomotion	biological_process	6	ENSRNOG00000018735,ENSRNOG00000003357,ENSRNOG00000015368,ENSRNOG00000003897,ENSRNOG00000002265,ENSRNOG00000001224,
2	GO:0032991	macromolecular complex	cellular_component	20	ENSRNOG00000049695,ENSRNOG00000047706,ENSRNOG00000032844,ENSRNOG00000010841,ENSRNOG00000019728,ENSRNOG00000053047,ENSRNOG00000004865,ENSRNOG00000020246,ENSRNOG00000061359,ENSRNOG00000021713,ENSRNOG00000004610,ENSRNOG00000002031,ENSRNOG00000060356,ENSRNOG00000058437,ENSRNOG00000015921,ENSRNOG00000001224,ENSRNOG00000033215,ENSRNOG00000003897,ENSRNOG00000029386,ENSRNOG00000018735,
2	GO:0016020	membrane	cellular_component	49	ENSRNOG00000003537,ENSRNOG00000005903,ENSRNOG00000046683,ENSRNOG00000052130,ENSRNOG00000047706,ENSRNOG00000025094,ENSRNOG00000020845,ENSRNOG00000009260,ENSRNOG00000015860,ENSRNOG00000004865,ENSRNOG00000015972,ENSRNOG00000013426,ENSRNOG00000026306,ENSRNOG00000037167,ENSRNOG00000005807,ENSRNOG00000029386,ENSRNOG00000012995,ENSRNOG00000013791,ENSRNOG00000026989,ENSRNOG00000028598,ENSRNOG00000033215,…
2	GO:0044425	membrane part	cellular_component	47	ENSRNOG00000020501,ENSRNOG00000007664,ENSRNOG00000004698,ENSRNOG00000053332,ENSRNOG00000042628,ENSRNOG00000019728,ENSRNOG00000000451,ENSRNOG00000046452,ENSRNOG00000038835,ENSRNOG00000032844,ENSRNOG00000020953,ENSRNOG00000008736,ENSRNOG00000002265,ENSRNOG00000002776,ENSRNOG00000020369,ENSRNOG00000030726,ENSRNOG00000022239,ENSRNOG00000008816,ENSRNOG00000039048,ENSRNOG00000025670,ENSRNOG00000050325,…
2	GO:0031974	membrane-enclosed lumen	cellular_component	8	ENSRNOG00000031211,ENSRNOG00000017421,ENSRNOG00000053047,ENSRNOG00000016294,ENSRNOG00000015921,ENSRNOG00000020501,ENSRNOG00000032246,ENSRNOG00000058437,
2	GO:0008152	metabolic process	biological_process	57	ENSRNOG00000020369,ENSRNOG00000059500,ENSRNOG00000012049,ENSRNOG00000002265,ENSRNOG00000053047,ENSRNOG00000030726,ENSRNOG00000043311,ENSRNOG00000015368,ENSRNOG00000042860,ENSRNOG00000007664,ENSRNOG00000011718,ENSRNOG00000008736,ENSRNOG00000049695,ENSRNOG00000018735,ENSRNOG00000057901,ENSRNOG00000001865,ENSRNOG00000028036,ENSRNOG00000003897,ENSRNOG00000013794,ENSRNOG00000011659,ENSRNOG00000003544,…
2	GO:0098772	molecular function regulator	molecular_function	5	ENSRNOG00000000443,ENSRNOG00000059500,ENSRNOG00000001865,ENSRNOG00000043311,ENSRNOG00000046834,
2	GO:0060089	molecular transducer activity	molecular_function	15	ENSRNOG00000002265,ENSRNOG00000013791,ENSRNOG00000009260,ENSRNOG00000015860,ENSRNOG00000028598,ENSRNOG00000012995,ENSRNOG00000018735,ENSRNOG00000016294,ENSRNOG00000001224,ENSRNOG00000013426,ENSRNOG00000004698,ENSRNOG00000050325,ENSRNOG00000025094,ENSRNOG00000026306,ENSRNOG00000008736,
2	GO:0032501	multicellular organismal process	biological_process	47	ENSRNOG00000032844,ENSRNOG00000049695,ENSRNOG00000038835,ENSRNOG00000000451,ENSRNOG00000005695,ENSRNOG00000015368,ENSRNOG00000042860,ENSRNOG00000007664,ENSRNOG00000008816,ENSRNOG00000030726,ENSRNOG00000053047,ENSRNOG00000059500,ENSRNOG00000020369,ENSRNOG00000012049,ENSRNOG00000002265,ENSRNOG00000004610,ENSRNOG00000011659,ENSRNOG00000003544,ENSRNOG00000018735,ENSRNOG00000001865,ENSRNOG00000028036,…
2	GO:0051704	multi-organism process	biological_process	11	ENSRNOG00000048297,ENSRNOG00000015368,ENSRNOG00000038835,ENSRNOG00000046452,ENSRNOG00000008736,ENSRNOG00000009260,ENSRNOG00000020369,ENSRNOG00000008680,ENSRNOG00000053047,ENSRNOG00000016294,ENSRNOG00000013973,
2	GO:0048519	negative regulation of biological process	biological_process	21	ENSRNOG00000043311,ENSRNOG00000000451,ENSRNOG00000046452,ENSRNOG00000038835,ENSRNOG00000003357,ENSRNOG00000059500,ENSRNOG00000020369,ENSRNOG00000009260,ENSRNOG00000046834,ENSRNOG00000012049,ENSRNOG00000015860,ENSRNOG00000008816,ENSRNOG00000058437,ENSRNOG00000048297,ENSRNOG00000011360,ENSRNOG00000026306,ENSRNOG00000018735,ENSRNOG00000028036,ENSRNOG00000001865,ENSRNOG00000003897,ENSRNOG00000000443,
2	GO:0001071	nucleic acid binding transcription factor activity	molecular_function	2	ENSRNOG00000003544,ENSRNOG00000012049,
2	GO:0043226	organelle	cellular_component	54	ENSRNOG00000015921,ENSRNOG00000026177,ENSRNOG00000001224,ENSRNOG00000016294,ENSRNOG00000025608,ENSRNOG00000013973,ENSRNOG00000031211,ENSRNOG00000008680,ENSRNOG00000013791,ENSRNOG00000004882,ENSRNOG00000005807,ENSRNOG00000023465,ENSRNOG00000058437,ENSRNOG00000015972,ENSRNOG00000013426,ENSRNOG00000020400,ENSRNOG00000004865,ENSRNOG00000020246,ENSRNOG00000046834,ENSRNOG00000003537,ENSRNOG00000042220,…
2	GO:0044422	organelle part	cellular_component	17	ENSRNOG00000060356,ENSRNOG00000032246,ENSRNOG00000021555,ENSRNOG00000058437,ENSRNOG00000021713,ENSRNOG00000004882,ENSRNOG00000031211,ENSRNOG00000017421,ENSRNOG00000016294,ENSRNOG00000015921,ENSRNOG00000025608,ENSRNOG00000020501,ENSRNOG00000003537,ENSRNOG00000049695,ENSRNOG00000032844,ENSRNOG00000020246,ENSRNOG00000053047,
2	GO:0048518	positive regulation of biological process	biological_process	29	ENSRNOG00000007664,ENSRNOG00000003537,ENSRNOG00000000451,ENSRNOG00000038835,ENSRNOG00000025094,ENSRNOG00000002265,ENSRNOG00000015860,ENSRNOG00000046834,ENSRNOG00000012049,ENSRNOG00000059500,ENSRNOG00000020369,ENSRNOG00000003357,ENSRNOG00000001627,ENSRNOG00000053047,ENSRNOG00000048297,ENSRNOG00000022273,ENSRNOG00000011360,ENSRNOG00000021555,ENSRNOG00000004610,ENSRNOG00000026306,ENSRNOG00000003897,…
2	GO:0050789	regulation of biological process	biological_process	55	ENSRNOG00000004610,ENSRNOG00000021713,ENSRNOG00000050325,ENSRNOG00000022273,ENSRNOG00000021555,ENSRNOG00000003544,ENSRNOG00000003897,ENSRNOG00000013794,ENSRNOG00000018735,ENSRNOG00000057901,ENSRNOG00000028036,ENSRNOG00000001865,ENSRNOG00000046452,ENSRNOG00000038835,ENSRNOG00000008736,ENSRNOG00000007664,ENSRNOG00000020501,ENSRNOG00000019728,ENSRNOG00000043311,ENSRNOG00000000451,ENSRNOG00000015368,…
2	GO:0000003	reproduction	biological_process	5	ENSRNOG00000005903,ENSRNOG00000048297,ENSRNOG00000059500,ENSRNOG00000020369,ENSRNOG00000015368,
2	GO:0022414	reproductive process	biological_process	5	ENSRNOG00000020369,ENSRNOG00000059500,ENSRNOG00000015368,ENSRNOG00000048297,ENSRNOG00000005903,
2	GO:0050896	response to stimulus	biological_process	49	ENSRNOG00000013794,ENSRNOG00000003897,ENSRNOG00000004273,ENSRNOG00000028036,ENSRNOG00000001865,ENSRNOG00000018735,ENSRNOG00000050325,ENSRNOG00000004610,ENSRNOG00000002265,ENSRNOG00000002776,ENSRNOG00000012049,ENSRNOG00000020369,ENSRNOG00000059500,ENSRNOG00000022239,ENSRNOG00000053047,ENSRNOG00000007664,ENSRNOG00000000451,ENSRNOG00000019728,ENSRNOG00000043311,ENSRNOG00000038835,ENSRNOG00000046452,…
2	GO:0048511	rhythmic process	biological_process	1	ENSRNOG00000053047,
2	GO:0004871	signal transducer activity	molecular_function	11	ENSRNOG00000002265,ENSRNOG00000015860,ENSRNOG00000009260,ENSRNOG00000012995,ENSRNOG00000020845,ENSRNOG00000018735,ENSRNOG00000016294,ENSRNOG00000001224,ENSRNOG00000013426,ENSRNOG00000050325,ENSRNOG00000025094,
2	GO:0023052	signaling	biological_process	25	ENSRNOG00000038835,ENSRNOG00000025094,ENSRNOG00000019728,ENSRNOG00000043311,ENSRNOG00000059500,ENSRNOG00000020369,ENSRNOG00000020845,ENSRNOG00000003357,ENSRNOG00000002265,ENSRNOG00000046834,ENSRNOG00000009260,ENSRNOG00000012049,ENSRNOG00000015860,ENSRNOG00000004632,ENSRNOG00000014653,ENSRNOG00000050325,ENSRNOG00000013426,ENSRNOG00000011360,ENSRNOG00000016294,ENSRNOG00000001224,ENSRNOG00000013973,…
2	GO:0044699	single-organism process	biological_process	70	ENSRNOG00000012049,ENSRNOG00000020369,ENSRNOG00000008816,ENSRNOG00000015368,ENSRNOG00000005695,ENSRNOG00000000451,ENSRNOG00000019728,ENSRNOG00000003897,ENSRNOG00000004273,ENSRNOG00000003544,ENSRNOG00000022273,ENSRNOG00000004610,ENSRNOG00000002459,ENSRNOG00000004632,ENSRNOG00000020246,ENSRNOG00000009260,ENSRNOG00000046834,ENSRNOG00000003357,ENSRNOG00000020845,ENSRNOG00000001627,ENSRNOG00000010841,…
2	GO:0005198	structural molecule activity	molecular_function	1	ENSRNOG00000003357,
2	GO:0099080	supramolecular complex	cellular_component	7	ENSRNOG00000003897,ENSRNOG00000060356,ENSRNOG00000020246,ENSRNOG00000004610,ENSRNOG00000049695,ENSRNOG00000021713,ENSRNOG00000004882,
2	GO:0045202	synapse	cellular_component	1	ENSRNOG00000002265,
2	GO:0044456	synapse part	cellular_component	1	ENSRNOG00000002265,
2	GO:0005215	transporter activity	molecular_function	5	ENSRNOG00000015972,ENSRNOG00000013794,ENSRNOG00000013973,ENSRNOG00000006010,ENSRNOG00000004865,
