# Supplementary material for: LncRNAs down-regulate Myh1, Casr, and Mis18a expression in the Substantia Nigra of aged male rats
Source: Aging (Albany NY). 2019 Oct 2;11(19):8313–28. doi: 10.18632/aging.102321 (PMC6814601; doi:10.18632/aging.102321)
Supplement: Supplementary Table 7 [file aging-11-102321-s017.xlsx]

## Sheet: Table 7
GO_ID	GO_term	TYPE	diff_gene_in_this_GO	UP_GENE	DOWN_GENE	all_diff_gene_in_all_GO	all_gene_in_this_GO	all_gene_in_all_GO	gene_UP_list	gene_DOWN_list	rich_factor	Pvalue	Qvalue
GO:0002495	antigen processing and presentation of peptide antigen via MHC class II	biological_process	4	4	0	102	16	19765	ENSRNOG00000033215(RT1-Db1),ENSRNOG00000000451(RT1-Ba),ENSRNOG00000032844(RT1-Da),ENSRNOG00000018735(Cd74),	-	48.4436	1.35565e-07	6.11058e-05
GO:0002504	antigen processing and presentation of peptide or polysaccharide antigen via MHC class II	biological_process	4	4	0	102	23	19765	ENSRNOG00000032844(RT1-Da),ENSRNOG00000000451(RT1-Ba),ENSRNOG00000033215(RT1-Db1),ENSRNOG00000018735(Cd74),	-	33.6999	6.35426e-07	0.000114567
GO:0048002	antigen processing and presentation of peptide antigen	biological_process	6	5	1	102	61	19765	ENSRNOG00000032844(RT1-Da),ENSRNOG00000033215(RT1-Db1),ENSRNOG00000018735(Cd74),ENSRNOG00000000451(RT1-Ba),ENSRNOG00000029386(RT1-N2),	ENSRNOG00000047706(RT1-CE16),	19.0598	1.38615e-07	4.99844e-05
GO:0042605	peptide antigen binding	molecular_function	4	3	1	102	42	19765	ENSRNOG00000029386(RT1-N2),ENSRNOG00000000451(RT1-Ba),ENSRNOG00000032844(RT1-Da),	ENSRNOG00000047706(RT1-CE16),	18.4547	9.14469e-06	0.000824394
GO:0050671	positive regulation of lymphocyte proliferation	biological_process	7	6	1	102	106	19765	ENSRNOG00000025094(Gpr183),ENSRNOG00000018735(Cd74),ENSRNOG00000007664(Tnfrsf13c),ENSRNOG00000003537(Spta1),ENSRNOG00000038835(Cd86),ENSRNOG00000016294(Cd4),	ENSRNOG00000020369(Igf2),	12.7964	3.27706e-07	8.44076e-05
GO:0042102	positive regulation of T cell proliferation	biological_process	5	4	1	102	76	19765	ENSRNOG00000003537(Spta1),ENSRNOG00000038835(Cd86),ENSRNOG00000016294(Cd4),ENSRNOG00000007664(Tnfrsf13c),	ENSRNOG00000020369(Igf2),	12.7483	9.18436e-06	0.000788542
GO:0032946	positive regulation of mononuclear cell proliferation	biological_process	7	6	1	102	108	19765	ENSRNOG00000007664(Tnfrsf13c),ENSRNOG00000025094(Gpr183),ENSRNOG00000018735(Cd74),ENSRNOG00000016294(Cd4),ENSRNOG00000003537(Spta1),ENSRNOG00000038835(Cd86),	ENSRNOG00000020369(Igf2),	12.5595	3.74873e-07	7.50996e-05
GO:0002260	lymphocyte homeostasis	biological_process	4	4	0	102	62	19765	ENSRNOG00000007664(Tnfrsf13c),ENSRNOG00000018735(Cd74),ENSRNOG00000026989(Gapt),ENSRNOG00000003537(Spta1),	-	12.5016	5.28727e-05	0.00307515
GO:0003823	antigen binding	molecular_function	5	4	1	102	79	19765	ENSRNOG00000032844(RT1-Da),ENSRNOG00000000451(RT1-Ba),ENSRNOG00000018735(Cd74),ENSRNOG00000029386(RT1-N2),	ENSRNOG00000047706(RT1-CE16),	12.2642	1.13216e-05	0.000850536
GO:0001776	leukocyte homeostasis	biological_process	5	5	0	102	79	19765	ENSRNOG00000026989(Gapt),ENSRNOG00000018735(Cd74),ENSRNOG00000007664(Tnfrsf13c),ENSRNOG00000046452(Fcgr2b),ENSRNOG00000003537(Spta1),	-	12.2642	1.13216e-05	0.000850536
GO:0019882	antigen processing and presentation	biological_process	6	5	1	102	96	19765	ENSRNOG00000000451(RT1-Ba),ENSRNOG00000032844(RT1-Da),ENSRNOG00000029386(RT1-N2),ENSRNOG00000033215(RT1-Db1),ENSRNOG00000018735(Cd74),	ENSRNOG00000047706(RT1-CE16),	12.1109	2.42216e-06	0.000335935
GO:0042100	B cell proliferation	biological_process	4	4	0	102	74	19765	ENSRNOG00000007664(Tnfrsf13c),ENSRNOG00000018735(Cd74),ENSRNOG00000025094(Gpr183),ENSRNOG00000026989(Gapt),	-	10.4743	0.00011725	0.00571355
GO:0050870	positive regulation of T cell activation	biological_process	7	6	1	102	135	19765	ENSRNOG00000003537(Spta1),ENSRNOG00000038835(Cd86),ENSRNOG00000000451(RT1-Ba),ENSRNOG00000016294(Cd4),ENSRNOG00000018735(Cd74),ENSRNOG00000007664(Tnfrsf13c),	ENSRNOG00000020369(Igf2),	10.0476	1.85466e-06	0.000303995
GO:0034112	positive regulation of homotypic cell-cell adhesion	biological_process	7	6	1	102	139	19765	ENSRNOG00000038835(Cd86),ENSRNOG00000003537(Spta1),ENSRNOG00000016294(Cd4),ENSRNOG00000000451(RT1-Ba),ENSRNOG00000018735(Cd74),ENSRNOG00000007664(Tnfrsf13c),	ENSRNOG00000020369(Igf2),	9.75843	2.28366e-06	0.000343119
GO:1903039	positive regulation of leukocyte cell-cell adhesion	biological_process	7	6	1	102	141	19765	ENSRNOG00000038835(Cd86),ENSRNOG00000003537(Spta1),ENSRNOG00000000451(RT1-Ba),ENSRNOG00000016294(Cd4),ENSRNOG00000018735(Cd74),ENSRNOG00000007664(Tnfrsf13c),	ENSRNOG00000020369(Igf2),	9.62001	2.52809e-06	0.000325581
GO:0042129	regulation of T cell proliferation	biological_process	6	5	1	102	123	19765	ENSRNOG00000007664(Tnfrsf13c),ENSRNOG00000000451(RT1-Ba),ENSRNOG00000016294(Cd4),ENSRNOG00000038835(Cd86),ENSRNOG00000003537(Spta1),	ENSRNOG00000020369(Igf2),	9.45242	1.14471e-05	0.000793812
GO:0007229	integrin-mediated signaling pathway	biological_process	4	3	1	102	86	19765	ENSRNOG00000020845(Tyrobp),ENSRNOG00000001224(Itgb2),ENSRNOG00000019728(Itgam),	ENSRNOG00000003357(Col3a1),	9.01277	0.000229923	0.0094216
GO:0042098	T cell proliferation	biological_process	7	6	1	102	151	19765	ENSRNOG00000016294(Cd4),ENSRNOG00000000451(RT1-Ba),ENSRNOG00000038835(Cd86),ENSRNOG00000003537(Spta1),ENSRNOG00000001224(Itgb2),ENSRNOG00000007664(Tnfrsf13c),	ENSRNOG00000020369(Igf2),	8.98292	4.11239e-06	0.000436156
GO:0046651	lymphocyte proliferation	biological_process	10	9	1	102	217	19765	ENSRNOG00000007664(Tnfrsf13c),ENSRNOG00000001224(Itgb2),ENSRNOG00000026989(Gapt),ENSRNOG00000018735(Cd74),ENSRNOG00000025094(Gpr183),ENSRNOG00000000451(RT1-Ba),ENSRNOG00000016294(Cd4),ENSRNOG00000038835(Cd86),ENSRNOG00000003537(Spta1),	ENSRNOG00000020369(Igf2),	8.9297	7.99799e-08	0.000144204
GO:0032943	mononuclear cell proliferation	biological_process	10	9	1	102	219	19765	ENSRNOG00000026989(Gapt),ENSRNOG00000018735(Cd74),ENSRNOG00000007664(Tnfrsf13c),ENSRNOG00000001224(Itgb2),ENSRNOG00000038835(Cd86),ENSRNOG00000003537(Spta1),ENSRNOG00000000451(RT1-Ba),ENSRNOG00000016294(Cd4),ENSRNOG00000025094(Gpr183),	ENSRNOG00000020369(Igf2),	8.84815	8.74134e-08	7.88032e-05
GO:0070661	leukocyte proliferation	biological_process	10	9	1	102	228	19765	ENSRNOG00000018735(Cd74),ENSRNOG00000026989(Gapt),ENSRNOG00000001224(Itgb2),ENSRNOG00000007664(Tnfrsf13c),ENSRNOG00000025094(Gpr183),ENSRNOG00000003537(Spta1),ENSRNOG00000038835(Cd86),ENSRNOG00000016294(Cd4),ENSRNOG00000000451(RT1-Ba),	ENSRNOG00000020369(Igf2),	8.49888	1.29029e-07	7.75465e-05
GO:0022409	positive regulation of cell-cell adhesion	biological_process	7	6	1	102	172	19765	ENSRNOG00000003537(Spta1),ENSRNOG00000038835(Cd86),ENSRNOG00000000451(RT1-Ba),ENSRNOG00000016294(Cd4),ENSRNOG00000018735(Cd74),ENSRNOG00000007664(Tnfrsf13c),	ENSRNOG00000020369(Igf2),	7.88617	1.03035e-05	0.000844421
GO:0051251	positive regulation of lymphocyte activation	biological_process	8	7	1	102	197	19765	ENSRNOG00000000451(RT1-Ba),ENSRNOG00000016294(Cd4),ENSRNOG00000038835(Cd86),ENSRNOG00000003537(Spta1),ENSRNOG00000025094(Gpr183),ENSRNOG00000007664(Tnfrsf13c),ENSRNOG00000018735(Cd74),	ENSRNOG00000020369(Igf2),	7.86902	3.08307e-06	0.000347424
GO:0002696	positive regulation of leukocyte activation	biological_process	8	7	1	102	223	19765	ENSRNOG00000003537(Spta1),ENSRNOG00000038835(Cd86),ENSRNOG00000016294(Cd4),ENSRNOG00000000451(RT1-Ba),ENSRNOG00000025094(Gpr183),ENSRNOG00000018735(Cd74),ENSRNOG00000007664(Tnfrsf13c),	ENSRNOG00000020369(Igf2),	6.95155	8.13881e-06	0.00077233
GO:0031214	biomineral tissue development	biological_process	4	1	3	102	113	19765	ENSRNOG00000008816(Gpnmb),	ENSRNOG00000005695(Mgp),ENSRNOG00000003897(Col1a1),ENSRNOG00000030726(Asgr2),	6.85927	0.000771608	0.0252947
GO:0050867	positive regulation of cell activation	biological_process	8	7	1	102	231	19765	ENSRNOG00000038835(Cd86),ENSRNOG00000003537(Spta1),ENSRNOG00000000451(RT1-Ba),ENSRNOG00000016294(Cd4),ENSRNOG00000025094(Gpr183),ENSRNOG00000018735(Cd74),ENSRNOG00000007664(Tnfrsf13c),	ENSRNOG00000020369(Igf2),	6.71081	1.0702e-05	0.000838946
GO:0033273	response to vitamin	biological_process	4	1	3	102	121	19765	ENSRNOG00000016294(Cd4),	ENSRNOG00000013794(Rbp1),ENSRNOG00000003897(Col1a1),ENSRNOG00000002265(Casr),	6.40577	0.00104127	0.0312901
GO:0050863	regulation of T cell activation	biological_process	7	6	1	102	212	19765	ENSRNOG00000016294(Cd4),ENSRNOG00000000451(RT1-Ba),ENSRNOG00000003537(Spta1),ENSRNOG00000038835(Cd86),ENSRNOG00000007664(Tnfrsf13c),ENSRNOG00000018735(Cd74),	ENSRNOG00000020369(Igf2),	6.39821	4.40826e-05	0.00264936
GO:0009897	external side of plasma membrane	cellular_component	7	7	0	102	228	19765	ENSRNOG00000038835(Cd86),ENSRNOG00000004698(Cd244),ENSRNOG00000016294(Cd4),ENSRNOG00000000451(RT1-Ba),ENSRNOG00000018735(Cd74),ENSRNOG00000007664(Tnfrsf13c),ENSRNOG00000002776(Sell),	-	5.94922	7.25544e-05	0.00396411
GO:0034109	homotypic cell-cell adhesion	biological_process	8	6	2	102	271	19765	ENSRNOG00000003537(Spta1),ENSRNOG00000000451(RT1-Ba),ENSRNOG00000007664(Tnfrsf13c),ENSRNOG00000038835(Cd86),ENSRNOG00000016294(Cd4),ENSRNOG00000018735(Cd74),	ENSRNOG00000020369(Igf2),ENSRNOG00000020246(Myl9),	5.72028	3.64822e-05	0.00226819
GO:0031012	extracellular matrix	cellular_component	10	0	10	102	340	19765	-	ENSRNOG00000004610(Lum),ENSRNOG00000003897(Col1a1),ENSRNOG00000001627(Abi3bp),ENSRNOG00000016058(Kazald1),ENSRNOG00000028036(Adamts7),ENSRNOG00000010841(Col8a2),ENSRNOG00000008680(Loxl1),ENSRNOG00000015902(Cpxm2),ENSRNOG00000003357(Col3a1),ENSRNOG00000005695(Mgp),	5.69925	5.65311e-06	0.000566254
GO:0032355	response to estradiol	biological_process	5	3	2	102	173	19765	ENSRNOG00000046452(Fcgr2b),ENSRNOG00000046834(C3),ENSRNOG00000016294(Cd4),	ENSRNOG00000003897(Col1a1),ENSRNOG00000020369(Igf2),	5.60042	0.000721508	0.0240903
GO:0002460	adaptive immune response based on somatic recombination of immune receptors built from immunoglobulin superfamily domains	biological_process	5	5	0	102	177	19765	ENSRNOG00000016294(Cd4),ENSRNOG00000046834(C3),ENSRNOG00000007664(Tnfrsf13c),ENSRNOG00000026989(Gapt),ENSRNOG00000018735(Cd74),	-	5.47386	0.000811171	0.0261168
GO:0005578	proteinaceous extracellular matrix	cellular_component	7	0	7	102	260	19765	-	ENSRNOG00000003357(Col3a1),ENSRNOG00000008680(Loxl1),ENSRNOG00000028036(Adamts7),ENSRNOG00000016058(Kazald1),ENSRNOG00000001627(Abi3bp),ENSRNOG00000003897(Col1a1),ENSRNOG00000004610(Lum),	5.21701	0.00017625	0.00775069
GO:0002250	adaptive immune response	biological_process	6	6	0	102	226	19765	ENSRNOG00000046834(C3),ENSRNOG00000026989(Gapt),ENSRNOG00000018735(Cd74),ENSRNOG00000007664(Tnfrsf13c),ENSRNOG00000016294(Cd4),ENSRNOG00000025094(Gpr183),	-	5.14446	0.000463145	0.0173969
GO:0042277	peptide binding	molecular_function	6	5	1	102	229	19765	ENSRNOG00000000451(RT1-Ba),ENSRNOG00000032844(RT1-Da),ENSRNOG00000015860(Gipr),ENSRNOG00000029386(RT1-N2),ENSRNOG00000018735(Cd74),	ENSRNOG00000047706(RT1-CE16),	5.07706	0.000500443	0.0184143
GO:0045785	positive regulation of cell adhesion	biological_process	8	6	2	102	307	19765	ENSRNOG00000018735(Cd74),ENSRNOG00000038835(Cd86),ENSRNOG00000016294(Cd4),ENSRNOG00000007664(Tnfrsf13c),ENSRNOG00000003537(Spta1),ENSRNOG00000000451(RT1-Ba),	ENSRNOG00000001627(Abi3bp),ENSRNOG00000020369(Igf2),	5.0495	9.33262e-05	0.00494903
GO:0050839	cell adhesion molecule binding	molecular_function	4	3	1	102	155	19765	ENSRNOG00000001224(Itgb2),ENSRNOG00000002776(Sell),ENSRNOG00000008816(Gpnmb),	ENSRNOG00000002265(Casr),	5.00063	0.00303123	0.0769762
GO:0042113	B cell activation	biological_process	5	5	0	102	194	19765	ENSRNOG00000038835(Cd86),ENSRNOG00000025094(Gpr183),ENSRNOG00000007664(Tnfrsf13c),ENSRNOG00000026989(Gapt),ENSRNOG00000018735(Cd74),	-	4.99419	0.00129333	0.0370138
GO:0009986	cell surface	cellular_component	16	13	3	102	656	19765	ENSRNOG00000004698(Cd244),ENSRNOG00000000451(RT1-Ba),ENSRNOG00000002776(Sell),ENSRNOG00000001224(Itgb2),ENSRNOG00000026306(Clec5a),ENSRNOG00000016294(Cd4),ENSRNOG00000046452(Fcgr2b),ENSRNOG00000050325(Emr4),ENSRNOG00000032844(RT1-Da),ENSRNOG00000007664(Tnfrsf13c),ENSRNOG00000038835(Cd86),ENSRNOG00000018735(Cd74),ENSRNOG00000020845(Tyrobp),	ENSRNOG00000028036(Adamts7),ENSRNOG00000013791(Enpp3),ENSRNOG00000002265(Casr),	4.72621	2.74473e-07	8.24792e-05
GO:0033218	amide binding	molecular_function	6	5	1	102	250	19765	ENSRNOG00000015860(Gipr),ENSRNOG00000032844(RT1-Da),ENSRNOG00000018735(Cd74),ENSRNOG00000029386(RT1-N2),ENSRNOG00000000451(RT1-Ba),	ENSRNOG00000047706(RT1-CE16),	4.65059	0.000834501	0.0263966
GO:0002366	leukocyte activation involved in immune response	biological_process	4	4	0	102	167	19765	ENSRNOG00000020845(Tyrobp),ENSRNOG00000026989(Gapt),ENSRNOG00000025094(Gpr183),ENSRNOG00000038835(Cd86),	-	4.64131	0.0041564	0.104083
GO:0002263	cell activation involved in immune response	biological_process	4	4	0	102	168	19765	ENSRNOG00000038835(Cd86),ENSRNOG00000025094(Gpr183),ENSRNOG00000020845(Tyrobp),ENSRNOG00000026989(Gapt),	-	4.61368	0.0042622	0.103848
GO:0022407	regulation of cell-cell adhesion	biological_process	7	6	1	102	299	19765	ENSRNOG00000018735(Cd74),ENSRNOG00000016294(Cd4),ENSRNOG00000038835(Cd86),ENSRNOG00000007664(Tnfrsf13c),ENSRNOG00000000451(RT1-Ba),ENSRNOG00000003537(Spta1),	ENSRNOG00000020369(Igf2),	4.53653	0.000444557	0.017054
GO:0004866	endopeptidase inhibitor activity	molecular_function	4	3	1	102	171	19765	ENSRNOG00000000443(C4a),ENSRNOG00000043311(Birc7),ENSRNOG00000046834(C3),	ENSRNOG00000001865(Serpind1),	4.53274	0.00459135	0.110376
GO:0042110	T cell activation	biological_process	8	7	1	102	344	19765	ENSRNOG00000018735(Cd74),ENSRNOG00000038835(Cd86),ENSRNOG00000016294(Cd4),ENSRNOG00000001224(Itgb2),ENSRNOG00000007664(Tnfrsf13c),ENSRNOG00000003537(Spta1),ENSRNOG00000000451(RT1-Ba),	ENSRNOG00000020369(Igf2),	4.50638	0.000216233	0.00928255
GO:0030198	extracellular matrix organization	biological_process	4	0	4	102	172	19765	-	ENSRNOG00000003897(Col1a1),ENSRNOG00000001627(Abi3bp),ENSRNOG00000016058(Kazald1),ENSRNOG00000003357(Col3a1),	4.50638	0.00470506	0.110172
GO:0071593	lymphocyte aggregation	biological_process	8	7	1	102	346	19765	ENSRNOG00000000451(RT1-Ba),ENSRNOG00000003537(Spta1),ENSRNOG00000007664(Tnfrsf13c),ENSRNOG00000001224(Itgb2),ENSRNOG00000016294(Cd4),ENSRNOG00000038835(Cd86),ENSRNOG00000018735(Cd74),	ENSRNOG00000020369(Igf2),	4.48034	0.000225584	0.00945879
GO:0050865	regulation of cell activation	biological_process	9	8	1	102	391	19765	ENSRNOG00000009260(Cnr2),ENSRNOG00000018735(Cd74),ENSRNOG00000016294(Cd4),ENSRNOG00000038835(Cd86),ENSRNOG00000007664(Tnfrsf13c),ENSRNOG00000000451(RT1-Ba),ENSRNOG00000003537(Spta1),ENSRNOG00000025094(Gpr183),	ENSRNOG00000020369(Igf2),	4.46028	0.000109764	0.00549735
GO:0070486	leukocyte aggregation	biological_process	8	7	1	102	353	19765	ENSRNOG00000018735(Cd74),ENSRNOG00000038835(Cd86),ENSRNOG00000016294(Cd4),ENSRNOG00000001224(Itgb2),ENSRNOG00000007664(Tnfrsf13c),ENSRNOG00000003537(Spta1),ENSRNOG00000000451(RT1-Ba),	ENSRNOG00000020369(Igf2),	4.39149	0.000261022	0.0104583
GO:0048872	homeostasis of number of cells	biological_process	5	5	0	102	221	19765	ENSRNOG00000003537(Spta1),ENSRNOG00000046452(Fcgr2b),ENSRNOG00000007664(Tnfrsf13c),ENSRNOG00000018735(Cd74),ENSRNOG00000026989(Gapt),	-	4.38404	0.00248305	0.0658374
GO:0008237	metallopeptidase activity	molecular_function	4	0	4	102	179	19765	-	ENSRNOG00000028036(Adamts7),ENSRNOG00000022610(Agbl1),ENSRNOG00000042860(Pappa2),ENSRNOG00000015902(Cpxm2),	4.33016	0.00555911	0.128501
GO:0002683	negative regulation of immune system process	biological_process	7	5	2	102	315	19765	ENSRNOG00000000451(RT1-Ba),ENSRNOG00000038835(Cd86),ENSRNOG00000046452(Fcgr2b),ENSRNOG00000009260(Cnr2),ENSRNOG00000018735(Cd74),	ENSRNOG00000020369(Igf2),ENSRNOG00000003357(Col3a1),	4.3061	0.000624133	0.0216406
GO:0007159	leukocyte cell-cell adhesion	biological_process	8	7	1	102	379	19765	ENSRNOG00000018735(Cd74),ENSRNOG00000038835(Cd86),ENSRNOG00000016294(Cd4),ENSRNOG00000007664(Tnfrsf13c),ENSRNOG00000001224(Itgb2),ENSRNOG00000003537(Spta1),ENSRNOG00000000451(RT1-Ba),	ENSRNOG00000020369(Igf2),	4.09023	0.000435963	0.0170879
GO:0030414	peptidase inhibitor activity	molecular_function	4	3	1	102	191	19765	ENSRNOG00000000443(C4a),ENSRNOG00000046834(C3),ENSRNOG00000043311(Birc7),	ENSRNOG00000001865(Serpind1),	4.0581	0.00727559	0.163974
GO:0001503	ossification	biological_process	7	2	5	102	346	19765	ENSRNOG00000008816(Gpnmb),ENSRNOG00000026306(Clec5a),	ENSRNOG00000020369(Igf2),ENSRNOG00000030726(Asgr2),ENSRNOG00000003897(Col1a1),ENSRNOG00000005695(Mgp),ENSRNOG00000002265(Casr),	3.92029	0.00113964	0.0331415
GO:0030097	hemopoiesis	biological_process	13	9	4	102	644	19765	ENSRNOG00000016294(Cd4),ENSRNOG00000003537(Spta1),ENSRNOG00000000451(RT1-Ba),ENSRNOG00000026306(Clec5a),ENSRNOG00000038835(Cd86),ENSRNOG00000018735(Cd74),ENSRNOG00000020845(Tyrobp),ENSRNOG00000025094(Gpr183),ENSRNOG00000014653(Arl11),	ENSRNOG00000013794(Rbp1),ENSRNOG00000059500(Cdkn1c),ENSRNOG00000015921(Esco2),ENSRNOG00000053047(Top2a),	3.9116	2.33829e-05	0.00150569
GO:0046649	lymphocyte activation	biological_process	10	9	1	102	499	19765	ENSRNOG00000018735(Cd74),ENSRNOG00000038835(Cd86),ENSRNOG00000016294(Cd4),ENSRNOG00000026989(Gapt),ENSRNOG00000001224(Itgb2),ENSRNOG00000007664(Tnfrsf13c),ENSRNOG00000003537(Spta1),ENSRNOG00000000451(RT1-Ba),ENSRNOG00000025094(Gpr183),	ENSRNOG00000020369(Igf2),	3.88326	0.000173058	0.00780058
GO:0043627	response to estrogen	biological_process	5	3	2	102	251	19765	ENSRNOG00000046452(Fcgr2b),ENSRNOG00000046834(C3),ENSRNOG00000016294(Cd4),	ENSRNOG00000003897(Col1a1),ENSRNOG00000020369(Igf2),	3.86005	0.00463175	0.109882
GO:0002520	immune system development	biological_process	14	10	4	102	726	19765	ENSRNOG00000038835(Cd86),ENSRNOG00000020845(Tyrobp),ENSRNOG00000018735(Cd74),ENSRNOG00000025094(Gpr183),ENSRNOG00000014653(Arl11),ENSRNOG00000016294(Cd4),ENSRNOG00000046834(C3),ENSRNOG00000000451(RT1-Ba),ENSRNOG00000003537(Spta1),ENSRNOG00000026306(Clec5a),	ENSRNOG00000015921(Esco2),ENSRNOG00000053047(Top2a),ENSRNOG00000013794(Rbp1),ENSRNOG00000059500(Cdkn1c),	3.7367	2.07742e-05	0.00138725
GO:0043588	skin development	biological_process	4	1	3	102	208	19765	ENSRNOG00000005903(St14),	ENSRNOG00000028598(Edar),ENSRNOG00000003357(Col3a1),ENSRNOG00000003897(Col1a1),	3.72643	0.010315	0.226804
GO:0001501	skeletal system development	biological_process	8	2	6	102	424	19765	ENSRNOG00000003544(Tbx4),ENSRNOG00000020845(Tyrobp),	ENSRNOG00000003357(Col3a1),ENSRNOG00000059500(Cdkn1c),ENSRNOG00000042860(Pappa2),ENSRNOG00000028036(Adamts7),ENSRNOG00000003897(Col1a1),ENSRNOG00000004610(Lum),	3.65612	0.000963954	0.0299657
GO:0006955	immune response	biological_process	18	14	4	102	957	19765	ENSRNOG00000016294(Cd4),ENSRNOG00000046834(C3),ENSRNOG00000000451(RT1-Ba),ENSRNOG00000013973(Lcn2),ENSRNOG00000029386(RT1-N2),ENSRNOG00000038835(Cd86),ENSRNOG00000033215(RT1-Db1),ENSRNOG00000020845(Tyrobp),ENSRNOG00000018735(Cd74),ENSRNOG00000000443(C4a),ENSRNOG00000025094(Gpr183),ENSRNOG00000032844(RT1-Da),ENSRNOG00000007664(Tnfrsf13c),ENSRNOG00000026989(Gapt),	ENSRNOG00000013791(Enpp3),ENSRNOG00000047706(RT1-CE16),ENSRNOG00000003357(Col3a1),ENSRNOG00000020369(Igf2),	3.64466	2.6272e-06	0.00031579
GO:0001775	cell activation	biological_process	13	11	2	102	700	19765	ENSRNOG00000001224(Itgb2),ENSRNOG00000003537(Spta1),ENSRNOG00000000451(RT1-Ba),ENSRNOG00000016294(Cd4),ENSRNOG00000026989(Gapt),ENSRNOG00000007664(Tnfrsf13c),ENSRNOG00000025094(Gpr183),ENSRNOG00000018735(Cd74),ENSRNOG00000009260(Cnr2),ENSRNOG00000020845(Tyrobp),ENSRNOG00000038835(Cd86),	ENSRNOG00000020369(Igf2),ENSRNOG00000020246(Myl9),	3.59867	5.69513e-05	0.00320885
GO:0061448	connective tissue development	biological_process	4	0	4	102	218	19765	-	ENSRNOG00000004610(Lum),ENSRNOG00000003897(Col1a1),ENSRNOG00000002265(Casr),ENSRNOG00000028036(Adamts7),	3.5555	0.012472	0.258471
GO:0007059	chromosome segregation	biological_process	4	0	4	102	219	19765	-	ENSRNOG00000021555(Mis18a),ENSRNOG00000053047(Top2a),ENSRNOG00000021713(Kif18b),ENSRNOG00000015921(Esco2),	3.53926	0.0127037	0.260282
GO:0009612	response to mechanical stimulus	biological_process	4	0	4	102	224	19765	-	ENSRNOG00000004865(Pkd1l1),ENSRNOG00000003897(Col1a1),ENSRNOG00000003357(Col3a1),ENSRNOG00000020369(Igf2),	3.46026	0.013908	0.278624
GO:0007584	response to nutrient	biological_process	4	1	3	102	224	19765	ENSRNOG00000016294(Cd4),	ENSRNOG00000002265(Casr),ENSRNOG00000003897(Col1a1),ENSRNOG00000013794(Rbp1),	3.46026	0.013908	0.278624
GO:0002521	leukocyte differentiation	biological_process	7	6	1	102	394	19765	ENSRNOG00000000451(RT1-Ba),ENSRNOG00000025094(Gpr183),ENSRNOG00000018735(Cd74),ENSRNOG00000020845(Tyrobp),ENSRNOG00000038835(Cd86),ENSRNOG00000016294(Cd4),	ENSRNOG00000013794(Rbp1),	3.44269	0.0025685	0.067116
GO:0010951	negative regulation of endopeptidase activity	biological_process	4	3	1	102	227	19765	ENSRNOG00000043311(Birc7),ENSRNOG00000046834(C3),ENSRNOG00000000443(C4a),	ENSRNOG00000001865(Serpind1),	3.41453	0.0146677	0.287454
GO:0050776	regulation of immune response	biological_process	8	6	2	102	463	19765	ENSRNOG00000000443(C4a),ENSRNOG00000007664(Tnfrsf13c),ENSRNOG00000038835(Cd86),ENSRNOG00000016294(Cd4),ENSRNOG00000046834(C3),ENSRNOG00000018735(Cd74),	ENSRNOG00000020369(Igf2),ENSRNOG00000003357(Col3a1),	3.34816	0.00176861	0.0490586
GO:0030155	regulation of cell adhesion	biological_process	9	6	3	102	526	19765	ENSRNOG00000007664(Tnfrsf13c),ENSRNOG00000018735(Cd74),ENSRNOG00000038835(Cd86),ENSRNOG00000003537(Spta1),ENSRNOG00000000451(RT1-Ba),ENSRNOG00000016294(Cd4),	ENSRNOG00000001627(Abi3bp),ENSRNOG00000020369(Igf2),ENSRNOG00000003897(Col1a1),	3.31553	0.00110809	0.0327521
GO:0002443	leukocyte mediated immunity	biological_process	4	3	1	102	235	19765	ENSRNOG00000026989(Gapt),ENSRNOG00000018735(Cd74),ENSRNOG00000046834(C3),	ENSRNOG00000020369(Igf2),	3.29829	0.0168337	0.303511
GO:0030099	myeloid cell differentiation	biological_process	5	3	2	102	298	19765	ENSRNOG00000020845(Tyrobp),ENSRNOG00000038835(Cd86),ENSRNOG00000026306(Clec5a),	ENSRNOG00000013794(Rbp1),ENSRNOG00000059500(Cdkn1c),	3.25125	0.0104685	0.224699
GO:0050778	positive regulation of immune response	biological_process	6	6	0	102	362	19765	ENSRNOG00000038835(Cd86),ENSRNOG00000016294(Cd4),ENSRNOG00000018735(Cd74),ENSRNOG00000046834(C3),ENSRNOG00000000443(C4a),ENSRNOG00000007664(Tnfrsf13c),	-	3.21173	0.00658304	0.150243
GO:0001819	positive regulation of cytokine production	biological_process	5	4	1	102	302	19765	ENSRNOG00000026306(Clec5a),ENSRNOG00000007664(Tnfrsf13c),ENSRNOG00000046834(C3),ENSRNOG00000018735(Cd74),	ENSRNOG00000004610(Lum),	3.20819	0.011138	0.236257
GO:0015631	tubulin binding	molecular_function	4	0	4	102	244	19765	-	ENSRNOG00000022610(Agbl1),ENSRNOG00000004882(Capn6),ENSRNOG00000021713(Kif18b),ENSRNOG00000060356(Kif15),	3.17663	0.019524	0.335254
GO:0098797	plasma membrane protein complex	cellular_component	7	6	1	102	428	19765	ENSRNOG00000001224(Itgb2),ENSRNOG00000029386(RT1-N2),ENSRNOG00000032844(RT1-Da),ENSRNOG00000033215(RT1-Db1),ENSRNOG00000019728(Itgam),ENSRNOG00000018735(Cd74),	ENSRNOG00000047706(RT1-CE16),	3.16921	0.00425076	0.104988
GO:0002684	positive regulation of immune system process	biological_process	10	9	1	102	616	19765	ENSRNOG00000003537(Spta1),ENSRNOG00000000451(RT1-Ba),ENSRNOG00000046834(C3),ENSRNOG00000016294(Cd4),ENSRNOG00000007664(Tnfrsf13c),ENSRNOG00000000443(C4a),ENSRNOG00000025094(Gpr183),ENSRNOG00000018735(Cd74),ENSRNOG00000038835(Cd86),	ENSRNOG00000020369(Igf2),	3.14569	0.000998415	0.0305109
GO:0010466	negative regulation of peptidase activity	biological_process	4	3	1	102	248	19765	ENSRNOG00000000443(C4a),ENSRNOG00000046834(C3),ENSRNOG00000043311(Birc7),	ENSRNOG00000001865(Serpind1),	3.1254	0.0208092	0.350644
GO:0016337	single organismal cell-cell adhesion	biological_process	9	7	2	102	574	19765	ENSRNOG00000007664(Tnfrsf13c),ENSRNOG00000018735(Cd74),ENSRNOG00000038835(Cd86),ENSRNOG00000001224(Itgb2),ENSRNOG00000003537(Spta1),ENSRNOG00000000451(RT1-Ba),ENSRNOG00000016294(Cd4),	ENSRNOG00000020246(Myl9),ENSRNOG00000020369(Igf2),	3.03828	0.00211394	0.0577489
GO:0002376	immune system process	biological_process	28	20	8	102	1792	19765	ENSRNOG00000016294(Cd4),ENSRNOG00000046452(Fcgr2b),ENSRNOG00000000451(RT1-Ba),ENSRNOG00000003537(Spta1),ENSRNOG00000026306(Clec5a),ENSRNOG00000020845(Tyrobp),ENSRNOG00000018735(Cd74),ENSRNOG00000025094(Gpr183),ENSRNOG00000032844(RT1-Da),ENSRNOG00000046834(C3),ENSRNOG00000013973(Lcn2),ENSRNOG00000001224(Itgb2),ENSRNOG00000029386(RT1-N2),ENSRNOG00000033215(RT1-Db1),ENSRNOG00000038835(Cd86),ENSRNOG0…	ENSRNOG00000013794(Rbp1),ENSRNOG00000013791(Enpp3),ENSRNOG00000015921(Esco2),ENSRNOG00000059500(Cdkn1c),ENSRNOG00000047706(RT1-CE16),ENSRNOG00000003357(Col3a1),ENSRNOG00000053047(Top2a),ENSRNOG00000020369(Igf2),	3.02773	3.64045e-07	8.20466e-05
GO:0002682	regulation of immune system process	biological_process	15	12	3	102	960	19765	ENSRNOG00000038835(Cd86),ENSRNOG00000018735(Cd74),ENSRNOG00000009260(Cnr2),ENSRNOG00000020845(Tyrobp),ENSRNOG00000000443(C4a),ENSRNOG00000025094(Gpr183),ENSRNOG00000007664(Tnfrsf13c),ENSRNOG00000016294(Cd4),ENSRNOG00000046452(Fcgr2b),ENSRNOG00000046834(C3),ENSRNOG00000003537(Spta1),ENSRNOG00000000451(RT1-Ba),	ENSRNOG00000003357(Col3a1),ENSRNOG00000020369(Igf2),ENSRNOG00000013794(Rbp1),	3.02773	0.000133416	0.00633022
GO:0031589	cell-substrate adhesion	biological_process	4	1	3	102	258	19765	ENSRNOG00000001224(Itgb2),	ENSRNOG00000001627(Abi3bp),ENSRNOG00000003897(Col1a1),ENSRNOG00000003357(Col3a1),	3.00426	0.0242725	0.383889
GO:0004857	enzyme inhibitor activity	molecular_function	5	3	2	102	324	19765	ENSRNOG00000046834(C3),ENSRNOG00000043311(Birc7),ENSRNOG00000000443(C4a),	ENSRNOG00000059500(Cdkn1c),ENSRNOG00000001865(Serpind1),	2.99035	0.0153906	0.289056
GO:0042692	muscle cell differentiation	biological_process	5	2	3	102	327	19765	ENSRNOG00000011659(Alpk3),ENSRNOG00000002459(Fbxo40),	ENSRNOG00000020369(Igf2),ENSRNOG00000048297(Qk),ENSRNOG00000013791(Enpp3),	2.96291	0.0160498	0.298328
GO:0030098	lymphocyte differentiation	biological_process	4	4	0	102	263	19765	ENSRNOG00000016294(Cd4),ENSRNOG00000018735(Cd74),ENSRNOG00000025094(Gpr183),ENSRNOG00000000451(RT1-Ba),	-	2.94714	0.0261423	0.409866
GO:0032496	response to lipopolysaccharide	biological_process	5	4	1	102	329	19765	ENSRNOG00000013973(Lcn2),ENSRNOG00000038835(Cd86),ENSRNOG00000009260(Cnr2),ENSRNOG00000046452(Fcgr2b),	ENSRNOG00000008680(Loxl1),	2.9449	0.0165003	0.303572
GO:0032403	protein complex binding	molecular_function	13	6	7	102	873	19765	ENSRNOG00000018735(Cd74),ENSRNOG00000008816(Gpnmb),ENSRNOG00000032844(RT1-Da),ENSRNOG00000016294(Cd4),ENSRNOG00000046452(Fcgr2b),ENSRNOG00000001224(Itgb2),	ENSRNOG00000021713(Kif18b),ENSRNOG00000002265(Casr),ENSRNOG00000060356(Kif15),ENSRNOG00000020369(Igf2),ENSRNOG00000001627(Abi3bp),ENSRNOG00000004610(Lum),ENSRNOG00000004882(Capn6),	2.88553	0.00053992	0.0190878
GO:0007155	cell adhesion	biological_process	16	11	5	102	1075	19765	ENSRNOG00000018735(Cd74),ENSRNOG00000000451(RT1-Ba),ENSRNOG00000003537(Spta1),ENSRNOG00000016294(Cd4),ENSRNOG00000007664(Tnfrsf13c),ENSRNOG00000008816(Gpnmb),ENSRNOG00000053332(Cdh26),ENSRNOG00000038835(Cd86),ENSRNOG00000019728(Itgam),ENSRNOG00000001224(Itgb2),ENSRNOG00000002776(Sell),	ENSRNOG00000020246(Myl9),ENSRNOG00000003897(Col1a1),ENSRNOG00000001627(Abi3bp),ENSRNOG00000020369(Igf2),ENSRNOG00000003357(Col3a1),	2.88409	0.00014999	0.00693416
GO:0052548	regulation of endopeptidase activity	biological_process	5	3	2	102	337	19765	ENSRNOG00000000443(C4a),ENSRNOG00000043311(Birc7),ENSRNOG00000046834(C3),	ENSRNOG00000001865(Serpind1),ENSRNOG00000012049(Sox7),	2.87499	0.0183935	0.321975
GO:0015833	peptide transport	biological_process	4	2	2	102	270	19765	ENSRNOG00000015860(Gipr),ENSRNOG00000018735(Cd74),	ENSRNOG00000028598(Edar),ENSRNOG00000002265(Casr),	2.87073	0.0289197	0.44566
GO:0042060	wound healing	biological_process	5	1	4	102	341	19765	ENSRNOG00000046834(C3),	ENSRNOG00000001865(Serpind1),ENSRNOG00000020369(Igf2),ENSRNOG00000020246(Myl9),ENSRNOG00000003897(Col1a1),	2.84127	0.0193959	0.336258
GO:0002237	response to molecule of bacterial origin	biological_process	5	4	1	102	342	19765	ENSRNOG00000013973(Lcn2),ENSRNOG00000038835(Cd86),ENSRNOG00000046452(Fcgr2b),ENSRNOG00000009260(Cnr2),	ENSRNOG00000008680(Loxl1),	2.83296	0.0196525	0.334278
GO:0098609	cell-cell adhesion	biological_process	10	8	2	102	705	19765	ENSRNOG00000038835(Cd86),ENSRNOG00000018735(Cd74),ENSRNOG00000053332(Cdh26),ENSRNOG00000007664(Tnfrsf13c),ENSRNOG00000016294(Cd4),ENSRNOG00000003537(Spta1),ENSRNOG00000000451(RT1-Ba),ENSRNOG00000001224(Itgb2),	ENSRNOG00000020369(Igf2),ENSRNOG00000020246(Myl9),	2.74857	0.0028894	0.0744226
GO:0001816	cytokine production	biological_process	7	6	1	102	495	19765	ENSRNOG00000007664(Tnfrsf13c),ENSRNOG00000026306(Clec5a),ENSRNOG00000008816(Gpnmb),ENSRNOG00000046834(C3),ENSRNOG00000018735(Cd74),ENSRNOG00000016294(Cd4),	ENSRNOG00000004610(Lum),	2.74025	0.00999938	0.222579
GO:0008610	lipid biosynthetic process	biological_process	6	3	3	102	425	19765	ENSRNOG00000046834(C3),ENSRNOG00000018735(Cd74),ENSRNOG00000032246(Acsm3),	ENSRNOG00000013794(Rbp1),ENSRNOG00000048297(Qk),ENSRNOG00000020369(Igf2),	2.73564	0.0152105	0.28868
GO:0009617	response to bacterium	biological_process	7	6	1	102	498	19765	ENSRNOG00000008736(Slamf8),ENSRNOG00000013973(Lcn2),ENSRNOG00000046452(Fcgr2b),ENSRNOG00000009260(Cnr2),ENSRNOG00000038835(Cd86),ENSRNOG00000016294(Cd4),	ENSRNOG00000008680(Loxl1),	2.72374	0.010352	0.224875
GO:0006631	fatty acid metabolic process	biological_process	4	3	1	102	287	19765	ENSRNOG00000032246(Acsm3),ENSRNOG00000031211(Acsm5),ENSRNOG00000018735(Cd74),	ENSRNOG00000048297(Qk),	2.70069	0.0364702	0.526046
GO:0097305	response to alcohol	biological_process	6	3	3	102	438	19765	ENSRNOG00000016294(Cd4),ENSRNOG00000046452(Fcgr2b),ENSRNOG00000046834(C3),	ENSRNOG00000002265(Casr),ENSRNOG00000020369(Igf2),ENSRNOG00000003897(Col1a1),	2.65445	0.017718	0.316292
GO:0001817	regulation of cytokine production	biological_process	6	5	1	102	439	19765	ENSRNOG00000008816(Gpnmb),ENSRNOG00000007664(Tnfrsf13c),ENSRNOG00000026306(Clec5a),ENSRNOG00000046834(C3),ENSRNOG00000018735(Cd74),	ENSRNOG00000004610(Lum),	2.6484	0.0179226	0.316809
GO:0052547	regulation of peptidase activity	biological_process	5	3	2	102	366	19765	ENSRNOG00000000443(C4a),ENSRNOG00000046834(C3),ENSRNOG00000043311(Birc7),	ENSRNOG00000012049(Sox7),ENSRNOG00000001865(Serpind1),	2.64719	0.0265574	0.412785
GO:0033993	response to lipid	biological_process	13	8	5	102	961	19765	ENSRNOG00000009260(Cnr2),ENSRNOG00000038835(Cd86),ENSRNOG00000000451(RT1-Ba),ENSRNOG00000013973(Lcn2),ENSRNOG00000046452(Fcgr2b),ENSRNOG00000015860(Gipr),ENSRNOG00000046834(C3),ENSRNOG00000016294(Cd4),	ENSRNOG00000020369(Igf2),ENSRNOG00000002265(Casr),ENSRNOG00000003897(Col1a1),ENSRNOG00000008680(Loxl1),ENSRNOG00000013794(Rbp1),	2.6213	0.00135726	0.0382365
GO:0001568	blood vessel development	biological_process	7	3	4	102	522	19765	ENSRNOG00000001224(Itgb2),ENSRNOG00000046834(C3),ENSRNOG00000003544(Tbx4),	ENSRNOG00000003357(Col3a1),ENSRNOG00000048297(Qk),ENSRNOG00000003897(Col1a1),ENSRNOG00000008680(Loxl1),	2.59851	0.0135251	0.273997
GO:0051222	positive regulation of protein transport	biological_process	5	2	3	102	374	19765	ENSRNOG00000026306(Clec5a),ENSRNOG00000015860(Gipr),	ENSRNOG00000028598(Edar),ENSRNOG00000021555(Mis18a),ENSRNOG00000002265(Casr),	2.59057	0.0291936	0.446069
GO:0001944	vasculature development	biological_process	7	3	4	102	541	19765	ENSRNOG00000003544(Tbx4),ENSRNOG00000046834(C3),ENSRNOG00000001224(Itgb2),	ENSRNOG00000048297(Qk),ENSRNOG00000003357(Col3a1),ENSRNOG00000008680(Loxl1),ENSRNOG00000003897(Col1a1),	2.50725	0.0165188	0.300842
GO:0032787	monocarboxylic acid metabolic process	biological_process	6	3	3	102	466	19765	ENSRNOG00000032246(Acsm3),ENSRNOG00000031211(Acsm5),ENSRNOG00000018735(Cd74),	ENSRNOG00000013794(Rbp1),ENSRNOG00000048297(Qk),ENSRNOG00000025608(Lrat),	2.49495	0.0241278	0.384978
GO:0007568	aging	biological_process	4	2	2	102	313	19765	ENSRNOG00000038835(Cd86),ENSRNOG00000001224(Itgb2),	ENSRNOG00000059500(Cdkn1c),ENSRNOG00000003357(Col3a1),	2.47635	0.0503502	0.662639
GO:0045177	apical part of cell	cellular_component	4	1	3	102	321	19765	ENSRNOG00000020501(Tjp3),	ENSRNOG00000028598(Edar),ENSRNOG00000002265(Casr),ENSRNOG00000006010(Slc6a20),	2.41464	0.0552153	0.706051
GO:0010817	regulation of hormone levels	biological_process	5	1	4	102	403	19765	ENSRNOG00000015860(Gipr),	ENSRNOG00000002265(Casr),ENSRNOG00000025608(Lrat),ENSRNOG00000013794(Rbp1),ENSRNOG00000020369(Igf2),	2.40415	0.0402664	0.562793
GO:0045861	negative regulation of proteolysis	biological_process	4	3	1	102	326	19765	ENSRNOG00000000443(C4a),ENSRNOG00000043311(Birc7),ENSRNOG00000046834(C3),	ENSRNOG00000001865(Serpind1),	2.3776	0.0584022	0.741543
GO:0034097	response to cytokine	biological_process	7	4	3	102	572	19765	ENSRNOG00000018735(Cd74),ENSRNOG00000038835(Cd86),ENSRNOG00000013973(Lcn2),ENSRNOG00000000451(RT1-Ba),	ENSRNOG00000003357(Col3a1),ENSRNOG00000003897(Col1a1),ENSRNOG00000028036(Adamts7),	2.37137	0.0224319	0.364366
GO:0071396	cellular response to lipid	biological_process	6	4	2	102	491	19765	ENSRNOG00000046452(Fcgr2b),ENSRNOG00000038835(Cd86),ENSRNOG00000013973(Lcn2),ENSRNOG00000000451(RT1-Ba),	ENSRNOG00000002265(Casr),ENSRNOG00000003897(Col1a1),	2.36792	0.0311327	0.467768
GO:0061061	muscle structure development	biological_process	6	2	4	102	510	19765	ENSRNOG00000011659(Alpk3),ENSRNOG00000002459(Fbxo40),	ENSRNOG00000020369(Igf2),ENSRNOG00000048297(Qk),ENSRNOG00000003357(Col3a1),ENSRNOG00000013791(Enpp3),	2.2797	0.0373421	0.534347
GO:0048514	blood vessel morphogenesis	biological_process	5	3	2	102	425	19765	ENSRNOG00000003544(Tbx4),ENSRNOG00000046834(C3),ENSRNOG00000001224(Itgb2),	ENSRNOG00000003357(Col3a1),ENSRNOG00000048297(Qk),	2.2797	0.0503566	0.657921
GO:0031667	response to nutrient levels	biological_process	6	2	4	102	517	19765	ENSRNOG00000016294(Cd4),ENSRNOG00000013973(Lcn2),	ENSRNOG00000002265(Casr),ENSRNOG00000020369(Igf2),ENSRNOG00000013794(Rbp1),ENSRNOG00000003897(Col1a1),	2.24883	0.0398338	0.565514
GO:0010038	response to metal ion	biological_process	4	3	1	102	345	19765	ENSRNOG00000046834(C3),ENSRNOG00000015860(Gipr),ENSRNOG00000038835(Cd86),	ENSRNOG00000002265(Casr),	2.24666	0.0715569	0.865886
GO:0010035	response to inorganic substance	biological_process	6	4	2	102	518	19765	ENSRNOG00000046834(C3),ENSRNOG00000015860(Gipr),ENSRNOG00000013973(Lcn2),ENSRNOG00000038835(Cd86),	ENSRNOG00000003897(Col1a1),ENSRNOG00000002265(Casr),	2.24449	0.040199	0.56624
GO:0009611	response to wounding	biological_process	7	3	4	102	617	19765	ENSRNOG00000009260(Cnr2),ENSRNOG00000046834(C3),ENSRNOG00000015860(Gipr),	ENSRNOG00000001865(Serpind1),ENSRNOG00000020246(Myl9),ENSRNOG00000020369(Igf2),ENSRNOG00000003897(Col1a1),	2.19841	0.0336074	0.496674
GO:0072358	cardiovascular system development	biological_process	10	4	6	102	884	19765	ENSRNOG00000046834(C3),ENSRNOG00000003544(Tbx4),ENSRNOG00000001224(Itgb2),ENSRNOG00000011659(Alpk3),	ENSRNOG00000008680(Loxl1),ENSRNOG00000004865(Pkd1l1),ENSRNOG00000003897(Col1a1),ENSRNOG00000048297(Qk),ENSRNOG00000003357(Col3a1),ENSRNOG00000004273(Ifitm1),	2.19202	0.0151142	0.29302
GO:0072359	circulatory system development	biological_process	10	4	6	102	884	19765	ENSRNOG00000011659(Alpk3),ENSRNOG00000001224(Itgb2),ENSRNOG00000046834(C3),ENSRNOG00000003544(Tbx4),	ENSRNOG00000004273(Ifitm1),ENSRNOG00000003357(Col3a1),ENSRNOG00000048297(Qk),ENSRNOG00000003897(Col1a1),ENSRNOG00000004865(Pkd1l1),ENSRNOG00000008680(Loxl1),	2.19202	0.0151142	0.29302
GO:0070848	response to growth factor	biological_process	6	0	6	102	533	19765	-	ENSRNOG00000003897(Col1a1),ENSRNOG00000028036(Adamts7),ENSRNOG00000059500(Cdkn1c),ENSRNOG00000004610(Lum),ENSRNOG00000002265(Casr),ENSRNOG00000003357(Col3a1),	2.18133	0.0459594	0.623044
GO:0046982	protein heterodimerization activity	molecular_function	5	3	2	102	447	19765	ENSRNOG00000001224(Itgb2),ENSRNOG00000003537(Spta1),ENSRNOG00000000451(RT1-Ba),	ENSRNOG00000053047(Top2a),ENSRNOG00000058437(Hist1h2ac),	2.1675	0.062003	0.776329
GO:0009607	response to biotic stimulus	biological_process	9	6	3	102	805	19765	ENSRNOG00000038835(Cd86),ENSRNOG00000009260(Cnr2),ENSRNOG00000008736(Slamf8),ENSRNOG00000013973(Lcn2),ENSRNOG00000016294(Cd4),ENSRNOG00000046452(Fcgr2b),	ENSRNOG00000022239(Tusc5),ENSRNOG00000004273(Ifitm1),ENSRNOG00000008680(Loxl1),	2.16642	0.0213247	0.356005
GO:0009991	response to extracellular stimulus	biological_process	6	2	4	102	543	19765	ENSRNOG00000016294(Cd4),ENSRNOG00000013973(Lcn2),	ENSRNOG00000013794(Rbp1),ENSRNOG00000003897(Col1a1),ENSRNOG00000002265(Casr),ENSRNOG00000020369(Igf2),	2.14115	0.0501011	0.664208
GO:0005615	extracellular space	cellular_component	12	5	7	102	1092	19765	ENSRNOG00000011718(C1rl),ENSRNOG00000000443(C4a),ENSRNOG00000013973(Lcn2),ENSRNOG00000046834(C3),ENSRNOG00000005903(St14),	ENSRNOG00000004610(Lum),ENSRNOG00000011360(Dkk2),ENSRNOG00000001865(Serpind1),ENSRNOG00000003897(Col1a1),ENSRNOG00000015902(Cpxm2),ENSRNOG00000001627(Abi3bp),ENSRNOG00000020369(Igf2),	2.12939	0.0111521	0.233804
GO:0071345	cellular response to cytokine stimulus	biological_process	5	3	2	102	457	19765	ENSRNOG00000013973(Lcn2),ENSRNOG00000018735(Cd74),ENSRNOG00000038835(Cd86),	ENSRNOG00000003897(Col1a1),ENSRNOG00000028036(Adamts7),	2.12007	0.0678315	0.831974
GO:0048513	animal organ development	biological_process	32	15	17	102	2933	19765	ENSRNOG00000016294(Cd4),ENSRNOG00000018735(Cd74),ENSRNOG00000025094(Gpr183),ENSRNOG00000005903(St14),ENSRNOG00000038835(Cd86),ENSRNOG00000042220(Vsx1),ENSRNOG00000008816(Gpnmb),ENSRNOG00000014653(Arl11),ENSRNOG00000003544(Tbx4),ENSRNOG00000015860(Gipr),ENSRNOG00000003537(Spta1),ENSRNOG00000000451(RT1-Ba),ENSRNOG00000011659(Alpk3),ENSRNOG00000026306(Clec5a),ENSRNOG00000020845(Tyrobp),	ENSRNOG00000013794(Rbp1),ENSRNOG00000010841(Col8a2),ENSRNOG00000028036(Adamts7),ENSRNOG00000004273(Ifitm1),ENSRNOG00000015921(Esco2),ENSRNOG00000030726(Asgr2),ENSRNOG00000004865(Pkd1l1),ENSRNOG00000042860(Pappa2),ENSRNOG00000002265(Casr),ENSRNOG00000028598(Edar),ENSRNOG00000003897(Col1a1),ENSRNOG00000005695(Mgp),ENSRNOG00000004610(Lum),ENSRNOG00000059500(Cdkn1c),ENSRNOG00000003357(Col3a1),ENSRNOG…	2.11414	0.000100892	0.00519736
GO:0008233	peptidase activity	molecular_function	7	2	5	102	645	19765	ENSRNOG00000005903(St14),ENSRNOG00000011718(C1rl),	ENSRNOG00000028036(Adamts7),ENSRNOG00000004882(Capn6),ENSRNOG00000015902(Cpxm2),ENSRNOG00000042860(Pappa2),ENSRNOG00000022610(Agbl1),	2.10298	0.0423138	0.582379
GO:0008284	positive regulation of cell proliferation	biological_process	8	6	2	102	744	19765	ENSRNOG00000038835(Cd86),ENSRNOG00000018735(Cd74),ENSRNOG00000025094(Gpr183),ENSRNOG00000007664(Tnfrsf13c),ENSRNOG00000016294(Cd4),ENSRNOG00000003537(Spta1),	ENSRNOG00000002265(Casr),ENSRNOG00000020369(Igf2),	2.0836	0.0347218	0.508971
GO:0051346	negative regulation of hydrolase activity	biological_process	4	3	1	102	374	19765	ENSRNOG00000000443(C4a),ENSRNOG00000043311(Birc7),ENSRNOG00000046834(C3),	ENSRNOG00000001865(Serpind1),	2.07245	0.0948954	1
GO:0048545	response to steroid hormone	biological_process	6	4	2	102	569	19765	ENSRNOG00000000451(RT1-Ba),ENSRNOG00000046834(C3),ENSRNOG00000046452(Fcgr2b),ENSRNOG00000016294(Cd4),	ENSRNOG00000003897(Col1a1),ENSRNOG00000020369(Igf2),	2.04332	0.0620456	0.771505
GO:0043410	positive regulation of MAPK cascade	biological_process	4	3	1	102	382	19765	ENSRNOG00000025094(Gpr183),ENSRNOG00000018735(Cd74),ENSRNOG00000046834(C3),	ENSRNOG00000020369(Igf2),	2.02905	0.102037	1
GO:0006952	defense response	biological_process	11	10	1	102	1064	19765	ENSRNOG00000009260(Cnr2),ENSRNOG00000038835(Cd86),ENSRNOG00000000443(C4a),ENSRNOG00000046834(C3),ENSRNOG00000001224(Itgb2),ENSRNOG00000013973(Lcn2),ENSRNOG00000018735(Cd74),ENSRNOG00000016294(Cd4),ENSRNOG00000000451(RT1-Ba),ENSRNOG00000008736(Slamf8),	ENSRNOG00000020369(Igf2),	2.00331	0.0222692	0.365012
GO:0045087	innate immune response	biological_process	4	3	1	102	389	19765	ENSRNOG00000038835(Cd86),ENSRNOG00000000451(RT1-Ba),ENSRNOG00000013973(Lcn2),	ENSRNOG00000020369(Igf2),	1.99254	0.108537	1
GO:0051050	positive regulation of transport	biological_process	8	4	4	102	798	19765	ENSRNOG00000026306(Clec5a),ENSRNOG00000016294(Cd4),ENSRNOG00000046834(C3),ENSRNOG00000015860(Gipr),	ENSRNOG00000025608(Lrat),ENSRNOG00000002265(Casr),ENSRNOG00000028598(Edar),ENSRNOG00000021555(Mis18a),	1.9426	0.0512045	0.664185
GO:0071363	cellular response to growth factor stimulus	biological_process	5	0	5	102	504	19765	-	ENSRNOG00000003897(Col1a1),ENSRNOG00000028036(Adamts7),ENSRNOG00000002265(Casr),ENSRNOG00000059500(Cdkn1c),ENSRNOG00000003357(Col3a1),	1.92237	0.099889	1
GO:0042493	response to drug	biological_process	5	3	2	102	509	19765	ENSRNOG00000038835(Cd86),ENSRNOG00000013973(Lcn2),ENSRNOG00000008736(Slamf8),	ENSRNOG00000020369(Igf2),ENSRNOG00000003897(Col1a1),	1.90348	0.103762	1
GO:0071417	cellular response to organonitrogen compound	biological_process	4	0	4	102	410	19765	-	ENSRNOG00000020369(Igf2),ENSRNOG00000003897(Col1a1),ENSRNOG00000003357(Col3a1),ENSRNOG00000002265(Casr),	1.89048	0.129442	1
GO:0006082	organic acid metabolic process	biological_process	8	4	4	102	825	19765	ENSRNOG00000032246(Acsm3),ENSRNOG00000012843(Aspg),ENSRNOG00000031211(Acsm5),ENSRNOG00000018735(Cd74),	ENSRNOG00000013794(Rbp1),ENSRNOG00000004610(Lum),ENSRNOG00000025608(Lrat),ENSRNOG00000048297(Qk),	1.87903	0.0612424	0.772168
GO:0005509	calcium ion binding	molecular_function	6	3	3	102	626	19765	ENSRNOG00000050325(Emr4),ENSRNOG00000053332(Cdh26),ENSRNOG00000003537(Spta1),	ENSRNOG00000002265(Casr),ENSRNOG00000005695(Mgp),ENSRNOG00000020246(Myl9),	1.85726	0.0945418	1
GO:1902533	positive regulation of intracellular signal transduction	biological_process	7	4	3	102	732	19765	ENSRNOG00000018735(Cd74),ENSRNOG00000025094(Gpr183),ENSRNOG00000046834(C3),ENSRNOG00000016294(Cd4),	ENSRNOG00000003357(Col3a1),ENSRNOG00000020369(Igf2),ENSRNOG00000028598(Edar),	1.85303	0.0793051	0.946934
GO:0008289	lipid binding	molecular_function	5	3	2	102	531	19765	ENSRNOG00000046834(C3),ENSRNOG00000025094(Gpr183),ENSRNOG00000034174(Bpifb4),	ENSRNOG00000013794(Rbp1),ENSRNOG00000025608(Lrat),	1.82462	0.12188	1
GO:0044255	cellular lipid metabolic process	biological_process	7	4	3	102	745	19765	ENSRNOG00000018735(Cd74),ENSRNOG00000031211(Acsm5),ENSRNOG00000032246(Acsm3),ENSRNOG00000046834(C3),	ENSRNOG00000048297(Qk),ENSRNOG00000025608(Lrat),ENSRNOG00000013794(Rbp1),	1.8207	0.0862425	1
GO:0009888	tissue development	biological_process	15	6	9	102	1598	19765	ENSRNOG00000003544(Tbx4),ENSRNOG00000011659(Alpk3),ENSRNOG00000005903(St14),ENSRNOG00000001224(Itgb2),ENSRNOG00000042220(Vsx1),ENSRNOG00000008816(Gpnmb),	ENSRNOG00000028598(Edar),ENSRNOG00000028036(Adamts7),ENSRNOG00000003897(Col1a1),ENSRNOG00000005695(Mgp),ENSRNOG00000012049(Sox7),ENSRNOG00000030726(Asgr2),ENSRNOG00000004610(Lum),ENSRNOG00000003357(Col3a1),ENSRNOG00000002265(Casr),	1.81891	0.0219254	0.362675
GO:0019752	carboxylic acid metabolic process	biological_process	7	4	3	102	750	19765	ENSRNOG00000032246(Acsm3),ENSRNOG00000012843(Aspg),ENSRNOG00000031211(Acsm5),ENSRNOG00000018735(Cd74),	ENSRNOG00000013794(Rbp1),ENSRNOG00000048297(Qk),ENSRNOG00000025608(Lrat),	1.80856	0.0890139	1
GO:0008283	cell proliferation	biological_process	15	10	5	102	1608	19765	ENSRNOG00000018735(Cd74),ENSRNOG00000025094(Gpr183),ENSRNOG00000016294(Cd4),ENSRNOG00000003537(Spta1),ENSRNOG00000000451(RT1-Ba),ENSRNOG00000038835(Cd86),ENSRNOG00000043311(Birc7),ENSRNOG00000026989(Gapt),ENSRNOG00000007664(Tnfrsf13c),ENSRNOG00000001224(Itgb2),	ENSRNOG00000012049(Sox7),ENSRNOG00000010841(Col8a2),ENSRNOG00000002265(Casr),ENSRNOG00000020369(Igf2),ENSRNOG00000059500(Cdkn1c),	1.8076	0.0231164	0.372132
GO:0007275	multicellular organism development	biological_process	39	18	21	102	4181	19765	ENSRNOG00000015860(Gipr),ENSRNOG00000000451(RT1-Ba),ENSRNOG00000026306(Clec5a),ENSRNOG00000020845(Tyrobp),ENSRNOG00000046834(C3),ENSRNOG00000015368(Pdilt),ENSRNOG00000018735(Cd74),ENSRNOG00000005903(St14),ENSRNOG00000001224(Itgb2),ENSRNOG00000038835(Cd86),ENSRNOG00000003544(Tbx4),ENSRNOG00000003537(Spta1),ENSRNOG00000011659(Alpk3),ENSRNOG00000016294(Cd4),ENSRNOG00000025094(Gpr183),ENSRNOG00000042…	ENSRNOG00000028598(Edar),ENSRNOG00000003897(Col1a1),ENSRNOG00000005695(Mgp),ENSRNOG00000004610(Lum),ENSRNOG00000008680(Loxl1),ENSRNOG00000004273(Ifitm1),ENSRNOG00000015921(Esco2),ENSRNOG00000011360(Dkk2),ENSRNOG00000002265(Casr),ENSRNOG00000059500(Cdkn1c),ENSRNOG00000048297(Qk),ENSRNOG00000003357(Col3a1),ENSRNOG00000053047(Top2a),ENSRNOG00000020369(Igf2),ENSRNOG00000013794(Rbp1),ENSRNOG0000001084…	1.80751	0.000514089	0.0185381
GO:0009887	organ morphogenesis	biological_process	8	2	6	102	868	19765	ENSRNOG00000003544(Tbx4),ENSRNOG00000042220(Vsx1),	ENSRNOG00000028598(Edar),ENSRNOG00000003897(Col1a1),ENSRNOG00000010841(Col8a2),ENSRNOG00000042860(Pappa2),ENSRNOG00000020369(Igf2),ENSRNOG00000003357(Col3a1),	1.78594	0.0799252	0.94806
GO:0051707	response to other organism	biological_process	7	6	1	102	763	19765	ENSRNOG00000046452(Fcgr2b),ENSRNOG00000016294(Cd4),ENSRNOG00000013973(Lcn2),ENSRNOG00000008736(Slamf8),ENSRNOG00000009260(Cnr2),ENSRNOG00000038835(Cd86),	ENSRNOG00000008680(Loxl1),	1.77775	0.0964909	1
GO:0043086	negative regulation of catalytic activity	biological_process	6	4	2	102	654	19765	ENSRNOG00000046834(C3),ENSRNOG00000009260(Cnr2),ENSRNOG00000043311(Birc7),ENSRNOG00000000443(C4a),	ENSRNOG00000059500(Cdkn1c),ENSRNOG00000001865(Serpind1),	1.77775	0.113846	1
GO:0043207	response to external biotic stimulus	biological_process	7	6	1	102	766	19765	ENSRNOG00000038835(Cd86),ENSRNOG00000009260(Cnr2),ENSRNOG00000016294(Cd4),ENSRNOG00000046452(Fcgr2b),ENSRNOG00000013973(Lcn2),ENSRNOG00000008736(Slamf8),	ENSRNOG00000008680(Loxl1),	1.77079	0.0982725	1
GO:0006897	endocytosis	biological_process	4	2	2	102	439	19765	ENSRNOG00000046834(C3),ENSRNOG00000046452(Fcgr2b),	ENSRNOG00000013791(Enpp3),ENSRNOG00000030726(Asgr2),	1.7656	0.161738	1
GO:0009967	positive regulation of signal transduction	biological_process	10	4	6	102	1107	19765	ENSRNOG00000025094(Gpr183),ENSRNOG00000018735(Cd74),ENSRNOG00000016294(Cd4),ENSRNOG00000046834(C3),	ENSRNOG00000011360(Dkk2),ENSRNOG00000028598(Edar),ENSRNOG00000003897(Col1a1),ENSRNOG00000020369(Igf2),ENSRNOG00000003357(Col3a1),ENSRNOG00000059500(Cdkn1c),	1.75045	0.0648282	0.800583
GO:0048856	anatomical structure development	biological_process	42	20	22	102	4660	19765	ENSRNOG00000046834(C3),ENSRNOG00000015368(Pdilt),ENSRNOG00000015860(Gipr),ENSRNOG00000026306(Clec5a),ENSRNOG00000000451(RT1-Ba),ENSRNOG00000020845(Tyrobp),ENSRNOG00000005903(St14),ENSRNOG00000001224(Itgb2),ENSRNOG00000002459(Fbxo40),ENSRNOG00000038835(Cd86),ENSRNOG00000018735(Cd74),ENSRNOG00000007664(Tnfrsf13c),ENSRNOG00000003544(Tbx4),ENSRNOG00000011659(Alpk3),ENSRNOG00000003537(Spta1),ENSRNOG00…	ENSRNOG00000003897(Col1a1),ENSRNOG00000028598(Edar),ENSRNOG00000005695(Mgp),ENSRNOG00000004610(Lum),ENSRNOG00000002265(Casr),ENSRNOG00000008680(Loxl1),ENSRNOG00000015921(Esco2),ENSRNOG00000004273(Ifitm1),ENSRNOG00000011360(Dkk2),ENSRNOG00000059500(Cdkn1c),ENSRNOG00000053047(Top2a),ENSRNOG00000003357(Col3a1),ENSRNOG00000048297(Qk),ENSRNOG00000020369(Igf2),ENSRNOG00000004865(Pkd1l1),ENSRNOG00000042…	1.74647	0.000649417	0.0220924
GO:0014070	response to organic cyclic compound	biological_process	9	5	4	102	1000	19765	ENSRNOG00000000451(RT1-Ba),ENSRNOG00000002776(Sell),ENSRNOG00000016294(Cd4),ENSRNOG00000046834(C3),ENSRNOG00000046452(Fcgr2b),	ENSRNOG00000003897(Col1a1),ENSRNOG00000020369(Igf2),ENSRNOG00000004610(Lum),ENSRNOG00000002265(Casr),	1.74397	0.0773088	0.929251
GO:0042127	regulation of cell proliferation	biological_process	12	8	4	102	1334	19765	ENSRNOG00000007664(Tnfrsf13c),ENSRNOG00000043311(Birc7),ENSRNOG00000038835(Cd86),ENSRNOG00000025094(Gpr183),ENSRNOG00000018735(Cd74),ENSRNOG00000003537(Spta1),ENSRNOG00000000451(RT1-Ba),ENSRNOG00000016294(Cd4),	ENSRNOG00000020369(Igf2),ENSRNOG00000002265(Casr),ENSRNOG00000059500(Cdkn1c),ENSRNOG00000012049(Sox7),	1.7431	0.049042	0.654983
GO:0048598	embryonic morphogenesis	biological_process	5	3	2	102	560	19765	ENSRNOG00000001224(Itgb2),ENSRNOG00000003544(Tbx4),ENSRNOG00000005903(St14),	ENSRNOG00000012049(Sox7),ENSRNOG00000059500(Cdkn1c),	1.73013	0.148446	1
GO:0042592	homeostatic process	biological_process	12	10	2	102	1347	19765	ENSRNOG00000018735(Cd74),ENSRNOG00000016294(Cd4),ENSRNOG00000046452(Fcgr2b),ENSRNOG00000015860(Gipr),ENSRNOG00000008736(Slamf8),ENSRNOG00000003537(Spta1),ENSRNOG00000015368(Pdilt),ENSRNOG00000007664(Tnfrsf13c),ENSRNOG00000026989(Gapt),ENSRNOG00000013973(Lcn2),	ENSRNOG00000030726(Asgr2),ENSRNOG00000002265(Casr),	1.72628	0.0524094	0.674958
GO:0030003	cellular cation homeostasis	biological_process	4	3	1	102	454	19765	ENSRNOG00000016294(Cd4),ENSRNOG00000015860(Gipr),ENSRNOG00000008736(Slamf8),	ENSRNOG00000002265(Casr),	1.70726	0.179972	1
GO:0008092	cytoskeletal protein binding	molecular_function	6	0	6	102	693	19765	-	ENSRNOG00000020246(Myl9),ENSRNOG00000021713(Kif18b),ENSRNOG00000060356(Kif15),ENSRNOG00000004882(Capn6),ENSRNOG00000022610(Agbl1),ENSRNOG00000049695(Myh1),	1.6777	0.144522	1
GO:0004175	endopeptidase activity	molecular_function	4	2	2	102	466	19765	ENSRNOG00000005903(St14),ENSRNOG00000011718(C1rl),	ENSRNOG00000028036(Adamts7),ENSRNOG00000004882(Capn6),	1.6633	0.19529	1
GO:0006873	cellular ion homeostasis	biological_process	4	3	1	102	467	19765	ENSRNOG00000008736(Slamf8),ENSRNOG00000015860(Gipr),ENSRNOG00000016294(Cd4),	ENSRNOG00000002265(Casr),	1.65974	0.196596	1
GO:0048729	tissue morphogenesis	biological_process	5	3	2	102	590	19765	ENSRNOG00000005903(St14),ENSRNOG00000003544(Tbx4),ENSRNOG00000042220(Vsx1),	ENSRNOG00000002265(Casr),ENSRNOG00000003357(Col3a1),	1.64216	0.179117	1
GO:0032502	developmental process	biological_process	42	20	22	102	4964	19765	ENSRNOG00000015368(Pdilt),ENSRNOG00000046834(C3),ENSRNOG00000020845(Tyrobp),ENSRNOG00000026306(Clec5a),ENSRNOG00000000451(RT1-Ba),ENSRNOG00000015860(Gipr),ENSRNOG00000002459(Fbxo40),ENSRNOG00000038835(Cd86),ENSRNOG00000001224(Itgb2),ENSRNOG00000005903(St14),ENSRNOG00000018735(Cd74),ENSRNOG00000007664(Tnfrsf13c),ENSRNOG00000011659(Alpk3),ENSRNOG00000003537(Spta1),ENSRNOG00000003544(Tbx4),ENSRNOG00…	ENSRNOG00000004610(Lum),ENSRNOG00000005695(Mgp),ENSRNOG00000003897(Col1a1),ENSRNOG00000028598(Edar),ENSRNOG00000002265(Casr),ENSRNOG00000011360(Dkk2),ENSRNOG00000015921(Esco2),ENSRNOG00000004273(Ifitm1),ENSRNOG00000008680(Loxl1),ENSRNOG00000020369(Igf2),ENSRNOG00000053047(Top2a),ENSRNOG00000003357(Col3a1),ENSRNOG00000048297(Qk),ENSRNOG00000059500(Cdkn1c),ENSRNOG00000004865(Pkd1l1),ENSRNOG00000042…	1.63951	0.00218627	0.0588334
GO:0009605	response to external stimulus	biological_process	16	9	7	102	1900	19765	ENSRNOG00000001224(Itgb2),ENSRNOG00000013973(Lcn2),ENSRNOG00000046834(C3),ENSRNOG00000009260(Cnr2),ENSRNOG00000038835(Cd86),ENSRNOG00000008736(Slamf8),ENSRNOG00000046452(Fcgr2b),ENSRNOG00000016294(Cd4),ENSRNOG00000018735(Cd74),	ENSRNOG00000004865(Pkd1l1),ENSRNOG00000020369(Igf2),ENSRNOG00000002265(Casr),ENSRNOG00000003357(Col3a1),ENSRNOG00000003897(Col1a1),ENSRNOG00000008680(Loxl1),ENSRNOG00000013794(Rbp1),	1.63179	0.0469292	0.631443
GO:0050801	ion homeostasis	biological_process	5	4	1	102	595	19765	ENSRNOG00000016294(Cd4),ENSRNOG00000015860(Gipr),ENSRNOG00000008736(Slamf8),ENSRNOG00000013973(Lcn2),	ENSRNOG00000002265(Casr),	1.62836	0.18454	1
GO:0019901	protein kinase binding	molecular_function	4	2	2	102	488	19765	ENSRNOG00000016294(Cd4),ENSRNOG00000001224(Itgb2),	ENSRNOG00000053047(Top2a),ENSRNOG00000002265(Casr),	1.58832	0.22501	1
GO:0035295	tube development	biological_process	5	2	3	102	610	19765	ENSRNOG00000003544(Tbx4),ENSRNOG00000005903(St14),	ENSRNOG00000003357(Col3a1),ENSRNOG00000002265(Casr),ENSRNOG00000028598(Edar),	1.58832	0.201331	1
GO:0006508	proteolysis	biological_process	12	5	7	102	1469	19765	ENSRNOG00000011718(C1rl),ENSRNOG00000046834(C3),ENSRNOG00000005903(St14),ENSRNOG00000043311(Birc7),ENSRNOG00000000443(C4a),	ENSRNOG00000015902(Cpxm2),ENSRNOG00000028036(Adamts7),ENSRNOG00000001865(Serpind1),ENSRNOG00000012049(Sox7),ENSRNOG00000042860(Pappa2),ENSRNOG00000022610(Agbl1),ENSRNOG00000004882(Capn6),	1.58291	0.0926723	1
GO:0000165	MAPK cascade	biological_process	5	3	2	102	616	19765	ENSRNOG00000025094(Gpr183),ENSRNOG00000018735(Cd74),ENSRNOG00000046834(C3),	ENSRNOG00000020369(Igf2),ENSRNOG00000002265(Casr),	1.57285	0.208266	1
GO:0006954	inflammatory response	biological_process	4	4	0	102	493	19765	ENSRNOG00000009260(Cnr2),ENSRNOG00000046834(C3),ENSRNOG00000000443(C4a),ENSRNOG00000001224(Itgb2),	-	1.57221	0.232051	1
GO:0051223	regulation of protein transport	biological_process	5	2	3	102	618	19765	ENSRNOG00000026306(Clec5a),ENSRNOG00000015860(Gipr),	ENSRNOG00000028598(Edar),ENSRNOG00000021555(Mis18a),ENSRNOG00000002265(Casr),	1.56775	0.210604	1
GO:0010628	positive regulation of gene expression	biological_process	12	3	9	102	1485	19765	ENSRNOG00000013973(Lcn2),ENSRNOG00000001224(Itgb2),ENSRNOG00000046834(C3),	ENSRNOG00000059500(Cdkn1c),ENSRNOG00000020369(Igf2),ENSRNOG00000048297(Qk),ENSRNOG00000002265(Casr),ENSRNOG00000053047(Top2a),ENSRNOG00000028598(Edar),ENSRNOG00000003897(Col1a1),ENSRNOG00000004610(Lum),ENSRNOG00000012049(Sox7),	1.56585	0.0992065	1
GO:0006629	lipid metabolic process	biological_process	8	4	4	102	997	19765	ENSRNOG00000046834(C3),ENSRNOG00000032246(Acsm3),ENSRNOG00000031211(Acsm5),ENSRNOG00000018735(Cd74),	ENSRNOG00000013794(Rbp1),ENSRNOG00000048297(Qk),ENSRNOG00000025608(Lrat),ENSRNOG00000020369(Igf2),	1.55486	0.157743	1
GO:0030162	regulation of proteolysis	biological_process	5	3	2	102	625	19765	ENSRNOG00000000443(C4a),ENSRNOG00000043311(Birc7),ENSRNOG00000046834(C3),	ENSRNOG00000012049(Sox7),ENSRNOG00000001865(Serpind1),	1.5502	0.218897	1
GO:0030154	cell differentiation	biological_process	25	15	10	102	3139	19765	ENSRNOG00000005903(St14),ENSRNOG00000001224(Itgb2),ENSRNOG00000042220(Vsx1),ENSRNOG00000038835(Cd86),ENSRNOG00000002459(Fbxo40),ENSRNOG00000014653(Arl11),ENSRNOG00000008816(Gpnmb),ENSRNOG00000016294(Cd4),ENSRNOG00000018735(Cd74),ENSRNOG00000025094(Gpr183),ENSRNOG00000015368(Pdilt),ENSRNOG00000011659(Alpk3),ENSRNOG00000026306(Clec5a),ENSRNOG00000000451(RT1-Ba),ENSRNOG00000020845(Tyrobp),	ENSRNOG00000013791(Enpp3),ENSRNOG00000013794(Rbp1),ENSRNOG00000028036(Adamts7),ENSRNOG00000015921(Esco2),ENSRNOG00000059500(Cdkn1c),ENSRNOG00000053047(Top2a),ENSRNOG00000048297(Qk),ENSRNOG00000003357(Col3a1),ENSRNOG00000020369(Igf2),ENSRNOG00000003897(Col1a1),	1.54328	0.030687	0.464947
GO:0007507	heart development	biological_process	4	1	3	102	507	19765	ENSRNOG00000011659(Alpk3),	ENSRNOG00000003357(Col3a1),ENSRNOG00000004273(Ifitm1),ENSRNOG00000004865(Pkd1l1),	1.52879	0.252312	1
GO:0005576	extracellular region	cellular_component	27	10	17	102	3458	19765	ENSRNOG00000001224(Itgb2),ENSRNOG00000005903(St14),ENSRNOG00000038835(Cd86),ENSRNOG00000034174(Bpifb4),ENSRNOG00000018735(Cd74),ENSRNOG00000013973(Lcn2),ENSRNOG00000046834(C3),ENSRNOG00000000443(C4a),ENSRNOG00000011718(C1rl),ENSRNOG00000032844(RT1-Da),	ENSRNOG00000042860(Pappa2),ENSRNOG00000001627(Abi3bp),ENSRNOG00000016058(Kazald1),ENSRNOG00000028036(Adamts7),ENSRNOG00000010841(Col8a2),ENSRNOG00000008680(Loxl1),ENSRNOG00000013791(Enpp3),ENSRNOG00000011360(Dkk2),ENSRNOG00000001865(Serpind1),ENSRNOG00000013426(Mrgprf),ENSRNOG00000020369(Igf2),ENSRNOG00000003357(Col3a1),ENSRNOG00000003897(Col1a1),ENSRNOG00000026177(Mgam),ENSRNOG00000015902(Cpxm2)…	1.51299	0.031973	0.476423
GO:0048646	anatomical structure formation involved in morphogenesis	biological_process	8	5	3	102	1027	19765	ENSRNOG00000003544(Tbx4),ENSRNOG00000001224(Itgb2),ENSRNOG00000005903(St14),ENSRNOG00000046834(C3),ENSRNOG00000007664(Tnfrsf13c),	ENSRNOG00000003897(Col1a1),ENSRNOG00000028598(Edar),ENSRNOG00000012049(Sox7),	1.50944	0.180757	1
GO:0023014	signal transduction by protein phosphorylation	biological_process	5	3	2	102	642	19765	ENSRNOG00000018735(Cd74),ENSRNOG00000025094(Gpr183),ENSRNOG00000046834(C3),	ENSRNOG00000002265(Casr),ENSRNOG00000020369(Igf2),	1.50915	0.239717	1
GO:0010033	response to organic substance	biological_process	19	10	9	102	2448	19765	ENSRNOG00000015860(Gipr),ENSRNOG00000000451(RT1-Ba),ENSRNOG00000009260(Cnr2),ENSRNOG00000046834(C3),ENSRNOG00000013973(Lcn2),ENSRNOG00000002776(Sell),ENSRNOG00000018735(Cd74),ENSRNOG00000016294(Cd4),ENSRNOG00000046452(Fcgr2b),ENSRNOG00000038835(Cd86),	ENSRNOG00000004610(Lum),ENSRNOG00000003897(Col1a1),ENSRNOG00000003357(Col3a1),ENSRNOG00000020369(Igf2),ENSRNOG00000059500(Cdkn1c),ENSRNOG00000013794(Rbp1),ENSRNOG00000008680(Loxl1),ENSRNOG00000028036(Adamts7),ENSRNOG00000002265(Casr),	1.50397	0.0680359	0.828843
GO:0050793	regulation of developmental process	biological_process	15	8	7	102	1954	19765	ENSRNOG00000020845(Tyrobp),ENSRNOG00000018735(Cd74),ENSRNOG00000000451(RT1-Ba),ENSRNOG00000003537(Spta1),ENSRNOG00000007664(Tnfrsf13c),ENSRNOG00000038835(Cd86),ENSRNOG00000001224(Itgb2),ENSRNOG00000046834(C3),	ENSRNOG00000005695(Mgp),ENSRNOG00000028036(Adamts7),ENSRNOG00000003897(Col1a1),ENSRNOG00000013794(Rbp1),ENSRNOG00000013791(Enpp3),ENSRNOG00000020369(Igf2),ENSRNOG00000003357(Col3a1),	1.48752	0.104721	1
GO:0048869	cellular developmental process	biological_process	26	16	10	102	3407	19765	ENSRNOG00000018735(Cd74),ENSRNOG00000025094(Gpr183),ENSRNOG00000016294(Cd4),ENSRNOG00000038835(Cd86),ENSRNOG00000002459(Fbxo40),ENSRNOG00000042220(Vsx1),ENSRNOG00000008816(Gpnmb),ENSRNOG00000014653(Arl11),ENSRNOG00000005903(St14),ENSRNOG00000001224(Itgb2),ENSRNOG00000020845(Tyrobp),ENSRNOG00000003537(Spta1),ENSRNOG00000000451(RT1-Ba),ENSRNOG00000011659(Alpk3),ENSRNOG00000026306(Clec5a),ENSRNOG000…	ENSRNOG00000015921(Esco2),ENSRNOG00000013791(Enpp3),ENSRNOG00000013794(Rbp1),ENSRNOG00000028036(Adamts7),ENSRNOG00000003897(Col1a1),ENSRNOG00000003357(Col3a1),ENSRNOG00000048297(Qk),ENSRNOG00000053047(Top2a),ENSRNOG00000020369(Igf2),ENSRNOG00000059500(Cdkn1c),	1.47876	0.0447389	0.611093
GO:0046983	protein dimerization activity	molecular_function	8	6	2	102	1053	19765	ENSRNOG00000013973(Lcn2),ENSRNOG00000001224(Itgb2),ENSRNOG00000020400(Mef2b),ENSRNOG00000000451(RT1-Ba),ENSRNOG00000003537(Spta1),ENSRNOG00000016294(Cd4),	ENSRNOG00000053047(Top2a),ENSRNOG00000058437(Hist1h2ac),	1.47217	0.202215	1
GO:0070201	regulation of establishment of protein localization	biological_process	5	2	3	102	660	19765	ENSRNOG00000015860(Gipr),ENSRNOG00000026306(Clec5a),	ENSRNOG00000002265(Casr),ENSRNOG00000021555(Mis18a),ENSRNOG00000028598(Edar),	1.46799	0.262786	1
GO:0009653	anatomical structure morphogenesis	biological_process	17	7	10	102	2251	19765	ENSRNOG00000042220(Vsx1),ENSRNOG00000005903(St14),ENSRNOG00000001224(Itgb2),ENSRNOG00000007664(Tnfrsf13c),ENSRNOG00000046834(C3),ENSRNOG00000003544(Tbx4),ENSRNOG00000003537(Spta1),	ENSRNOG00000002265(Casr),ENSRNOG00000042860(Pappa2),ENSRNOG00000012049(Sox7),ENSRNOG00000010841(Col8a2),ENSRNOG00000048297(Qk),ENSRNOG00000003357(Col3a1),ENSRNOG00000020369(Igf2),ENSRNOG00000059500(Cdkn1c),ENSRNOG00000003897(Col1a1),ENSRNOG00000028598(Edar),	1.46342	0.100083	1
GO:0010243	response to organonitrogen compound	biological_process	6	2	4	102	795	19765	ENSRNOG00000002776(Sell),ENSRNOG00000009260(Cnr2),	ENSRNOG00000003897(Col1a1),ENSRNOG00000020369(Igf2),ENSRNOG00000003357(Col3a1),ENSRNOG00000002265(Casr),	1.46245	0.245495	1
GO:0070062	extracellular exosome	cellular_component	16	8	8	102	2156	19765	ENSRNOG00000018735(Cd74),ENSRNOG00000038835(Cd86),ENSRNOG00000005903(St14),ENSRNOG00000001224(Itgb2),ENSRNOG00000032844(RT1-Da),ENSRNOG00000011718(C1rl),ENSRNOG00000046834(C3),ENSRNOG00000013973(Lcn2),	ENSRNOG00000001865(Serpind1),ENSRNOG00000013791(Enpp3),ENSRNOG00000042860(Pappa2),ENSRNOG00000005695(Mgp),ENSRNOG00000004610(Lum),ENSRNOG00000026177(Mgam),ENSRNOG00000020369(Igf2),ENSRNOG00000013426(Mrgprf),	1.43803	0.122761	1
GO:0009790	embryo development	biological_process	7	3	4	102	946	19765	ENSRNOG00000005903(St14),ENSRNOG00000003544(Tbx4),ENSRNOG00000001224(Itgb2),	ENSRNOG00000059500(Cdkn1c),ENSRNOG00000003897(Col1a1),ENSRNOG00000012049(Sox7),ENSRNOG00000053047(Top2a),	1.43385	0.244786	1
GO:0007166	cell surface receptor signaling pathway	biological_process	14	8	6	102	1893	19765	ENSRNOG00000015860(Gipr),ENSRNOG00000016294(Cd4),ENSRNOG00000020845(Tyrobp),ENSRNOG00000018735(Cd74),ENSRNOG00000001224(Itgb2),ENSRNOG00000013973(Lcn2),ENSRNOG00000019728(Itgam),ENSRNOG00000050325(Emr4),	ENSRNOG00000003897(Col1a1),ENSRNOG00000012049(Sox7),ENSRNOG00000011360(Dkk2),ENSRNOG00000059500(Cdkn1c),ENSRNOG00000003357(Col3a1),ENSRNOG00000020369(Igf2),	1.43309	0.145492	1
GO:1903561	extracellular vesicle	cellular_component	16	8	8	102	2169	19765	ENSRNOG00000001224(Itgb2),ENSRNOG00000005903(St14),ENSRNOG00000038835(Cd86),ENSRNOG00000018735(Cd74),ENSRNOG00000013973(Lcn2),ENSRNOG00000046834(C3),ENSRNOG00000011718(C1rl),ENSRNOG00000032844(RT1-Da),	ENSRNOG00000042860(Pappa2),ENSRNOG00000013791(Enpp3),ENSRNOG00000001865(Serpind1),ENSRNOG00000013426(Mrgprf),ENSRNOG00000020369(Igf2),ENSRNOG00000026177(Mgam),ENSRNOG00000004610(Lum),ENSRNOG00000005695(Mgp),	1.42941	0.128071	1
GO:0005768	endosome	cellular_component	4	3	1	102	544	19765	ENSRNOG00000046452(Fcgr2b),ENSRNOG00000018735(Cd74),ENSRNOG00000032844(RT1-Da),	ENSRNOG00000025608(Lrat),	1.42481	0.309522	1
GO:0097367	carbohydrate derivative binding	molecular_function	15	9	6	102	2040	19765	ENSRNOG00000016294(Cd4),ENSRNOG00000017421(Alpk2),ENSRNOG00000032246(Acsm3),ENSRNOG00000011659(Alpk3),ENSRNOG00000012184(Urgcp),ENSRNOG00000031211(Acsm5),ENSRNOG00000008816(Gpnmb),ENSRNOG00000014653(Arl11),ENSRNOG00000001224(Itgb2),	ENSRNOG00000021713(Kif18b),ENSRNOG00000001865(Serpind1),ENSRNOG00000053047(Top2a),ENSRNOG00000060356(Kif15),ENSRNOG00000001627(Abi3bp),ENSRNOG00000049695(Myh1),	1.42481	0.140589	1
GO:0019900	kinase binding	molecular_function	4	2	2	102	550	19765	ENSRNOG00000001224(Itgb2),ENSRNOG00000016294(Cd4),	ENSRNOG00000002265(Casr),ENSRNOG00000053047(Top2a),	1.40927	0.319268	1
GO:0043408	regulation of MAPK cascade	biological_process	4	3	1	102	557	19765	ENSRNOG00000018735(Cd74),ENSRNOG00000025094(Gpr183),ENSRNOG00000046834(C3),	ENSRNOG00000020369(Igf2),	1.39156	0.330793	1
GO:0016462	pyrophosphatase activity	molecular_function	5	0	5	102	700	19765	-	ENSRNOG00000013791(Enpp3),ENSRNOG00000049695(Myh1),ENSRNOG00000060356(Kif15),ENSRNOG00000053047(Top2a),ENSRNOG00000021713(Kif18b),	1.3841	0.317612	1
GO:0019725	cellular homeostasis	biological_process	5	4	1	102	700	19765	ENSRNOG00000015368(Pdilt),ENSRNOG00000008736(Slamf8),ENSRNOG00000015860(Gipr),ENSRNOG00000016294(Cd4),	ENSRNOG00000002265(Casr),	1.3841	0.317612	1
GO:0016818	hydrolase activity, acting on acid anhydrides, in phosphorus-containing anhydrides	molecular_function	5	0	5	102	706	19765	-	ENSRNOG00000060356(Kif15),ENSRNOG00000053047(Top2a),ENSRNOG00000021713(Kif18b),ENSRNOG00000049695(Myh1),ENSRNOG00000013791(Enpp3),	1.37234	0.326236	1
GO:0016021	integral component of membrane	cellular_component	45	28	17	102	6379	19765	ENSRNOG00000025094(Gpr183),ENSRNOG00000016294(Cd4),ENSRNOG00000042628(RGD1561145),ENSRNOG00000008816(Gpnmb),ENSRNOG00000050325(Emr4),ENSRNOG00000039048(Cd200r1),ENSRNOG00000053332(Cdh26),ENSRNOG00000007664(Tnfrsf13c),ENSRNOG00000002776(Sell),ENSRNOG00000046683(RGD1566307),ENSRNOG00000018735(Cd74),ENSRNOG00000046452(Fcgr2b),ENSRNOG00000038835(Cd86),ENSRNOG00000033215(RT1-Db1),ENSRNOG00000026989(Ga…	ENSRNOG00000030726(Asgr2),ENSRNOG00000006010(Slc6a20),ENSRNOG00000013791(Enpp3),ENSRNOG00000025608(Lrat),ENSRNOG00000025670(Shisa3),ENSRNOG00000004865(Pkd1l1),ENSRNOG00000020369(Igf2),ENSRNOG00000004273(Ifitm1),ENSRNOG00000020953(Ms4a7),ENSRNOG00000002265(Casr),ENSRNOG00000047706(RT1-CE16),ENSRNOG00000022239(Tusc5),ENSRNOG00000012995(Gpr165),ENSRNOG00000028598(Edar),ENSRNOG00000015972(Ano5),ENSRN…	1.36696	0.0364165	0.529507
GO:0031982	vesicle	cellular_component	20	9	11	102	2843	19765	ENSRNOG00000013973(Lcn2),ENSRNOG00000046834(C3),ENSRNOG00000011718(C1rl),ENSRNOG00000032844(RT1-Da),ENSRNOG00000001224(Itgb2),ENSRNOG00000005903(St14),ENSRNOG00000008816(Gpnmb),ENSRNOG00000038835(Cd86),ENSRNOG00000018735(Cd74),	ENSRNOG00000013426(Mrgprf),ENSRNOG00000020369(Igf2),ENSRNOG00000015972(Ano5),ENSRNOG00000003897(Col1a1),ENSRNOG00000026177(Mgam),ENSRNOG00000004610(Lum),ENSRNOG00000005695(Mgp),ENSRNOG00000042860(Pappa2),ENSRNOG00000008680(Loxl1),ENSRNOG00000013791(Enpp3),ENSRNOG00000001865(Serpind1),	1.36317	0.141388	1
GO:0016817	hydrolase activity, acting on acid anhydrides	molecular_function	5	0	5	102	713	19765	-	ENSRNOG00000021713(Kif18b),ENSRNOG00000053047(Top2a),ENSRNOG00000060356(Kif15),ENSRNOG00000013791(Enpp3),ENSRNOG00000049695(Myh1),	1.35887	0.336422	1
GO:0031224	intrinsic component of membrane	cellular_component	45	28	17	102	6440	19765	ENSRNOG00000042628(RGD1561145),ENSRNOG00000050325(Emr4),ENSRNOG00000008816(Gpnmb),ENSRNOG00000016294(Cd4),ENSRNOG00000025094(Gpr183),ENSRNOG00000002776(Sell),ENSRNOG00000039048(Cd200r1),ENSRNOG00000007664(Tnfrsf13c),ENSRNOG00000053332(Cdh26),ENSRNOG00000005903(St14),ENSRNOG00000029386(RT1-N2),ENSRNOG00000001224(Itgb2),ENSRNOG00000033215(RT1-Db1),ENSRNOG00000038835(Cd86),ENSRNOG00000026989(Gapt),E…	ENSRNOG00000004865(Pkd1l1),ENSRNOG00000025670(Shisa3),ENSRNOG00000025608(Lrat),ENSRNOG00000013791(Enpp3),ENSRNOG00000006010(Slc6a20),ENSRNOG00000030726(Asgr2),ENSRNOG00000020369(Igf2),ENSRNOG00000047706(RT1-CE16),ENSRNOG00000002265(Casr),ENSRNOG00000020953(Ms4a7),ENSRNOG00000004273(Ifitm1),ENSRNOG00000013426(Mrgprf),ENSRNOG00000052130(AABR07041724.1),ENSRNOG00000015972(Ano5),ENSRNOG00000028598(Ed…	1.35401	0.0419045	0.581183
GO:0032269	negative regulation of cellular protein metabolic process	biological_process	6	3	3	102	863	19765	ENSRNOG00000000443(C4a),ENSRNOG00000043311(Birc7),ENSRNOG00000046834(C3),	ENSRNOG00000001865(Serpind1),ENSRNOG00000048297(Qk),ENSRNOG00000059500(Cdkn1c),	1.34722	0.328413	1
GO:0005102	receptor binding	molecular_function	9	6	3	102	1309	19765	ENSRNOG00000038835(Cd86),ENSRNOG00000008816(Gpnmb),ENSRNOG00000046834(C3),ENSRNOG00000018735(Cd74),ENSRNOG00000020845(Tyrobp),ENSRNOG00000037167(Rtp3),	ENSRNOG00000002265(Casr),ENSRNOG00000020369(Igf2),ENSRNOG00000004632(Pmch),	1.33229	0.293215	1
GO:0046872	metal ion binding	molecular_function	22	11	11	102	3214	19765	ENSRNOG00000012723(Trim55),ENSRNOG00000003537(Spta1),ENSRNOG00000032246(Acsm3),ENSRNOG00000013973(Lcn2),ENSRNOG00000043311(Birc7),ENSRNOG00000053332(Cdh26),ENSRNOG00000016294(Cd4),ENSRNOG00000002459(Fbxo40),ENSRNOG00000031211(Acsm5),ENSRNOG00000050325(Emr4),ENSRNOG00000057901(AC126537.1),	ENSRNOG00000015902(Cpxm2),ENSRNOG00000003897(Col1a1),ENSRNOG00000005695(Mgp),ENSRNOG00000022610(Agbl1),ENSRNOG00000053047(Top2a),ENSRNOG00000003357(Col3a1),ENSRNOG00000008680(Loxl1),ENSRNOG00000013791(Enpp3),ENSRNOG00000028036(Adamts7),ENSRNOG00000020246(Myl9),ENSRNOG00000002265(Casr),	1.3264	0.158367	1
GO:0030234	enzyme regulator activity	molecular_function	5	3	2	102	731	19765	ENSRNOG00000043311(Birc7),ENSRNOG00000000443(C4a),ENSRNOG00000046834(C3),	ENSRNOG00000001865(Serpind1),ENSRNOG00000059500(Cdkn1c),	1.32541	0.363211	1
GO:0050790	regulation of catalytic activity	biological_process	12	7	5	102	1759	19765	ENSRNOG00000016294(Cd4),ENSRNOG00000008736(Slamf8),ENSRNOG00000018735(Cd74),ENSRNOG00000046834(C3),ENSRNOG00000009260(Cnr2),ENSRNOG00000043311(Birc7),ENSRNOG00000000443(C4a),	ENSRNOG00000022273(RGD1563242),ENSRNOG00000012049(Sox7),ENSRNOG00000001865(Serpind1),ENSRNOG00000059500(Cdkn1c),ENSRNOG00000002265(Casr),	1.32194	0.261779	1
GO:0044092	negative regulation of molecular function	biological_process	6	4	2	102	880	19765	ENSRNOG00000000443(C4a),ENSRNOG00000009260(Cnr2),ENSRNOG00000043311(Birc7),ENSRNOG00000046834(C3),	ENSRNOG00000001865(Serpind1),ENSRNOG00000059500(Cdkn1c),	1.32119	0.350883	1
GO:0046914	transition metal ion binding	molecular_function	9	5	4	102	1320	19765	ENSRNOG00000013973(Lcn2),ENSRNOG00000002459(Fbxo40),ENSRNOG00000043311(Birc7),ENSRNOG00000016294(Cd4),ENSRNOG00000012723(Trim55),	ENSRNOG00000022610(Agbl1),ENSRNOG00000008680(Loxl1),ENSRNOG00000015902(Cpxm2),ENSRNOG00000028036(Adamts7),	1.32119	0.304	1
GO:0008270	zinc ion binding	molecular_function	7	4	3	102	1036	19765	ENSRNOG00000016294(Cd4),ENSRNOG00000012723(Trim55),ENSRNOG00000002459(Fbxo40),ENSRNOG00000043311(Birc7),	ENSRNOG00000015902(Cpxm2),ENSRNOG00000028036(Adamts7),ENSRNOG00000022610(Agbl1),	1.30929	0.346149	1
GO:0042325	regulation of phosphorylation	biological_process	8	6	2	102	1185	19765	ENSRNOG00000008736(Slamf8),ENSRNOG00000016294(Cd4),ENSRNOG00000025094(Gpr183),ENSRNOG00000018735(Cd74),ENSRNOG00000001224(Itgb2),ENSRNOG00000046834(C3),	ENSRNOG00000059500(Cdkn1c),ENSRNOG00000020369(Igf2),	1.30818	0.331943	1
GO:0043169	cation binding	molecular_function	22	11	11	102	3293	19765	ENSRNOG00000057901(AC126537.1),ENSRNOG00000050325(Emr4),ENSRNOG00000031211(Acsm5),ENSRNOG00000002459(Fbxo40),ENSRNOG00000016294(Cd4),ENSRNOG00000053332(Cdh26),ENSRNOG00000043311(Birc7),ENSRNOG00000013973(Lcn2),ENSRNOG00000032246(Acsm3),ENSRNOG00000003537(Spta1),ENSRNOG00000012723(Trim55),	ENSRNOG00000002265(Casr),ENSRNOG00000020246(Myl9),ENSRNOG00000028036(Adamts7),ENSRNOG00000008680(Loxl1),ENSRNOG00000013791(Enpp3),ENSRNOG00000053047(Top2a),ENSRNOG00000003357(Col3a1),ENSRNOG00000022610(Agbl1),ENSRNOG00000005695(Mgp),ENSRNOG00000003897(Col1a1),ENSRNOG00000015902(Cpxm2),	1.29458	0.191583	1
GO:0055082	cellular chemical homeostasis	biological_process	4	3	1	102	599	19765	ENSRNOG00000015860(Gipr),ENSRNOG00000016294(Cd4),ENSRNOG00000008736(Slamf8),	ENSRNOG00000002265(Casr),	1.29399	0.403171	1
GO:0001934	positive regulation of protein phosphorylation	biological_process	5	4	1	102	752	19765	ENSRNOG00000046834(C3),ENSRNOG00000016294(Cd4),ENSRNOG00000025094(Gpr183),ENSRNOG00000018735(Cd74),	ENSRNOG00000020369(Igf2),	1.28839	0.395487	1
GO:0048878	chemical homeostasis	biological_process	6	4	2	102	904	19765	ENSRNOG00000015860(Gipr),ENSRNOG00000016294(Cd4),ENSRNOG00000013973(Lcn2),ENSRNOG00000008736(Slamf8),	ENSRNOG00000002265(Casr),ENSRNOG00000030726(Asgr2),	1.28611	0.383678	1
GO:0051046	regulation of secretion	biological_process	4	3	1	102	604	19765	ENSRNOG00000015860(Gipr),ENSRNOG00000026306(Clec5a),ENSRNOG00000018735(Cd74),	ENSRNOG00000002265(Casr),	1.28327	0.412124	1
GO:0043549	regulation of kinase activity	biological_process	4	3	1	102	605	19765	ENSRNOG00000018735(Cd74),ENSRNOG00000008736(Slamf8),ENSRNOG00000016294(Cd4),	ENSRNOG00000059500(Cdkn1c),	1.28115	0.413922	1
GO:0006950	response to stress	biological_process	19	11	8	102	2879	19765	ENSRNOG00000018735(Cd74),ENSRNOG00000016294(Cd4),ENSRNOG00000038835(Cd86),ENSRNOG00000001224(Itgb2),ENSRNOG00000008736(Slamf8),ENSRNOG00000000451(RT1-Ba),ENSRNOG00000015860(Gipr),ENSRNOG00000000443(C4a),ENSRNOG00000009260(Cnr2),ENSRNOG00000013973(Lcn2),ENSRNOG00000046834(C3),	ENSRNOG00000020246(Myl9),ENSRNOG00000015921(Esco2),ENSRNOG00000001865(Serpind1),ENSRNOG00000028036(Adamts7),ENSRNOG00000002265(Casr),ENSRNOG00000003897(Col1a1),ENSRNOG00000020369(Igf2),ENSRNOG00000053047(Top2a),	1.27882	0.235672	1
GO:0000278	mitotic cell cycle	biological_process	4	1	3	102	608	19765	ENSRNOG00000020501(Tjp3),	ENSRNOG00000021713(Kif18b),ENSRNOG00000020369(Igf2),ENSRNOG00000059500(Cdkn1c),	1.27483	0.419333	1
GO:0006468	protein phosphorylation	biological_process	10	7	3	102	1535	19765	ENSRNOG00000011659(Alpk3),ENSRNOG00000016294(Cd4),ENSRNOG00000017421(Alpk2),ENSRNOG00000025094(Gpr183),ENSRNOG00000018735(Cd74),ENSRNOG00000001224(Itgb2),ENSRNOG00000046834(C3),	ENSRNOG00000059500(Cdkn1c),ENSRNOG00000020369(Igf2),ENSRNOG00000002265(Casr),	1.26237	0.354857	1
GO:0016787	hydrolase activity	molecular_function	15	4	11	102	2311	19765	ENSRNOG00000005903(St14),ENSRNOG00000005807(Ptpn7),ENSRNOG00000011718(C1rl),ENSRNOG00000012843(Aspg),	ENSRNOG00000060356(Kif15),ENSRNOG00000042860(Pappa2),ENSRNOG00000049695(Myh1),ENSRNOG00000013791(Enpp3),ENSRNOG00000028036(Adamts7),ENSRNOG00000053047(Top2a),ENSRNOG00000022610(Agbl1),ENSRNOG00000004882(Capn6),ENSRNOG00000021713(Kif18b),ENSRNOG00000015902(Cpxm2),ENSRNOG00000026177(Mgam),	1.25773	0.302444	1
GO:0032880	regulation of protein localization	biological_process	5	2	3	102	775	19765	ENSRNOG00000026306(Clec5a),ENSRNOG00000015860(Gipr),	ENSRNOG00000002265(Casr),ENSRNOG00000028598(Edar),ENSRNOG00000021555(Mis18a),	1.25016	0.431995	1
GO:0071310	cellular response to organic substance	biological_process	11	5	6	102	1705	19765	ENSRNOG00000038835(Cd86),ENSRNOG00000013973(Lcn2),ENSRNOG00000018735(Cd74),ENSRNOG00000046452(Fcgr2b),ENSRNOG00000000451(RT1-Ba),	ENSRNOG00000003357(Col3a1),ENSRNOG00000002265(Casr),ENSRNOG00000020369(Igf2),ENSRNOG00000059500(Cdkn1c),ENSRNOG00000028036(Adamts7),ENSRNOG00000003897(Col1a1),	1.25016	0.357855	1
GO:0033365	protein localization to organelle	biological_process	4	0	4	102	623	19765	-	ENSRNOG00000003897(Col1a1),ENSRNOG00000028598(Edar),ENSRNOG00000021555(Mis18a),ENSRNOG00000015921(Esco2),	1.24414	0.446718	1
GO:0016310	phosphorylation	biological_process	12	8	4	102	1870	19765	ENSRNOG00000025094(Gpr183),ENSRNOG00000018735(Cd74),ENSRNOG00000008736(Slamf8),ENSRNOG00000011659(Alpk3),ENSRNOG00000016294(Cd4),ENSRNOG00000017421(Alpk2),ENSRNOG00000001224(Itgb2),ENSRNOG00000046834(C3),	ENSRNOG00000022273(RGD1563242),ENSRNOG00000020369(Igf2),ENSRNOG00000002265(Casr),ENSRNOG00000059500(Cdkn1c),	1.24347	0.355	1
GO:0001932	regulation of protein phosphorylation	biological_process	7	5	2	102	1092	19765	ENSRNOG00000025094(Gpr183),ENSRNOG00000018735(Cd74),ENSRNOG00000016294(Cd4),ENSRNOG00000001224(Itgb2),ENSRNOG00000046834(C3),	ENSRNOG00000020369(Igf2),ENSRNOG00000059500(Cdkn1c),	1.24214	0.417279	1
GO:0051174	regulation of phosphorus metabolic process	biological_process	9	7	2	102	1405	19765	ENSRNOG00000046834(C3),ENSRNOG00000001224(Itgb2),ENSRNOG00000015860(Gipr),ENSRNOG00000016294(Cd4),ENSRNOG00000008736(Slamf8),ENSRNOG00000018735(Cd74),ENSRNOG00000025094(Gpr183),	ENSRNOG00000059500(Cdkn1c),ENSRNOG00000020369(Igf2),	1.24126	0.393706	1
GO:0009725	response to hormone	biological_process	6	4	2	102	940	19765	ENSRNOG00000016294(Cd4),ENSRNOG00000046452(Fcgr2b),ENSRNOG00000046834(C3),ENSRNOG00000000451(RT1-Ba),	ENSRNOG00000003897(Col1a1),ENSRNOG00000020369(Igf2),	1.23686	0.435034	1
GO:0003006	developmental process involved in reproduction	biological_process	4	2	2	102	627	19765	ENSRNOG00000005903(St14),ENSRNOG00000015368(Pdilt),	ENSRNOG00000059500(Cdkn1c),ENSRNOG00000048297(Qk),	1.2362	0.45411	1
GO:0042327	positive regulation of phosphorylation	biological_process	5	4	1	102	789	19765	ENSRNOG00000018735(Cd74),ENSRNOG00000025094(Gpr183),ENSRNOG00000046834(C3),ENSRNOG00000016294(Cd4),	ENSRNOG00000020369(Igf2),	1.22798	0.454758	1
GO:0043167	ion binding	molecular_function	33	16	17	102	5208	19765	ENSRNOG00000012723(Trim55),ENSRNOG00000057901(AC126537.1),ENSRNOG00000002459(Fbxo40),ENSRNOG00000053332(Cdh26),ENSRNOG00000043311(Birc7),ENSRNOG00000013973(Lcn2),ENSRNOG00000011659(Alpk3),ENSRNOG00000012184(Urgcp),ENSRNOG00000003537(Spta1),ENSRNOG00000032246(Acsm3),ENSRNOG00000017421(Alpk2),ENSRNOG00000014653(Arl11),ENSRNOG00000008816(Gpnmb),ENSRNOG00000050325(Emr4),ENSRNOG00000031211(Acsm5),ENSR…	ENSRNOG00000005695(Mgp),ENSRNOG00000003897(Col1a1),ENSRNOG00000002265(Casr),ENSRNOG00000060356(Kif15),ENSRNOG00000049695(Myh1),ENSRNOG00000008680(Loxl1),ENSRNOG00000053047(Top2a),ENSRNOG00000003357(Col3a1),ENSRNOG00000022610(Agbl1),ENSRNOG00000021713(Kif18b),ENSRNOG00000015902(Cpxm2),ENSRNOG00000001627(Abi3bp),ENSRNOG00000025608(Lrat),ENSRNOG00000020246(Myl9),ENSRNOG00000001865(Serpind1),ENSRNOG0…	1.22783	0.208847	1
GO:0023051	regulation of signaling	biological_process	15	7	8	102	2376	19765	ENSRNOG00000015860(Gipr),ENSRNOG00000009260(Cnr2),ENSRNOG00000043311(Birc7),ENSRNOG00000046834(C3),ENSRNOG00000025094(Gpr183),ENSRNOG00000018735(Cd74),ENSRNOG00000016294(Cd4),	ENSRNOG00000028598(Edar),ENSRNOG00000003897(Col1a1),ENSRNOG00000020369(Igf2),ENSRNOG00000003357(Col3a1),ENSRNOG00000059500(Cdkn1c),ENSRNOG00000011360(Dkk2),ENSRNOG00000012049(Sox7),ENSRNOG00000002265(Casr),	1.22332	0.352153	1
GO:0009966	regulation of signal transduction	biological_process	13	6	7	102	2073	19765	ENSRNOG00000046834(C3),ENSRNOG00000043311(Birc7),ENSRNOG00000015860(Gipr),ENSRNOG00000016294(Cd4),ENSRNOG00000018735(Cd74),ENSRNOG00000025094(Gpr183),	ENSRNOG00000059500(Cdkn1c),ENSRNOG00000003357(Col3a1),ENSRNOG00000020369(Igf2),ENSRNOG00000028598(Edar),ENSRNOG00000003897(Col1a1),ENSRNOG00000012049(Sox7),ENSRNOG00000011360(Dkk2),	1.21518	0.385019	1
GO:0010646	regulation of cell communication	biological_process	15	7	8	102	2414	19765	ENSRNOG00000046834(C3),ENSRNOG00000009260(Cnr2),ENSRNOG00000043311(Birc7),ENSRNOG00000015860(Gipr),ENSRNOG00000016294(Cd4),ENSRNOG00000018735(Cd74),ENSRNOG00000025094(Gpr183),	ENSRNOG00000059500(Cdkn1c),ENSRNOG00000003357(Col3a1),ENSRNOG00000020369(Igf2),ENSRNOG00000028598(Edar),ENSRNOG00000003897(Col1a1),ENSRNOG00000002265(Casr),ENSRNOG00000012049(Sox7),ENSRNOG00000011360(Dkk2),	1.20407	0.383009	1
GO:0006915	apoptotic process	biological_process	9	5	4	102	1450	19765	ENSRNOG00000013973(Lcn2),ENSRNOG00000043311(Birc7),ENSRNOG00000046452(Fcgr2b),ENSRNOG00000026306(Clec5a),ENSRNOG00000018735(Cd74),	ENSRNOG00000053047(Top2a),ENSRNOG00000002265(Casr),ENSRNOG00000022273(RGD1563242),ENSRNOG00000012049(Sox7),	1.20274	0.445348	1
GO:0009893	positive regulation of metabolic process	biological_process	18	8	10	102	2905	19765	ENSRNOG00000016294(Cd4),ENSRNOG00000025094(Gpr183),ENSRNOG00000018735(Cd74),ENSRNOG00000001224(Itgb2),ENSRNOG00000015860(Gipr),ENSRNOG00000013973(Lcn2),ENSRNOG00000046834(C3),ENSRNOG00000007664(Tnfrsf13c),	ENSRNOG00000012049(Sox7),ENSRNOG00000002265(Casr),ENSRNOG00000028598(Edar),ENSRNOG00000003897(Col1a1),ENSRNOG00000022273(RGD1563242),ENSRNOG00000004610(Lum),ENSRNOG00000059500(Cdkn1c),ENSRNOG00000020369(Igf2),ENSRNOG00000048297(Qk),ENSRNOG00000053047(Top2a),	1.20067	0.361696	1
GO:0012501	programmed cell death	biological_process	9	5	4	102	1476	19765	ENSRNOG00000013973(Lcn2),ENSRNOG00000043311(Birc7),ENSRNOG00000046452(Fcgr2b),ENSRNOG00000026306(Clec5a),ENSRNOG00000018735(Cd74),	ENSRNOG00000002265(Casr),ENSRNOG00000053047(Top2a),ENSRNOG00000022273(RGD1563242),ENSRNOG00000012049(Sox7),	1.18155	0.476331	1
GO:0071944	cell periphery	cellular_component	29	23	6	102	4763	19765	ENSRNOG00000008816(Gpnmb),ENSRNOG00000025094(Gpr183),ENSRNOG00000016294(Cd4),ENSRNOG00000053332(Cdh26),ENSRNOG00000007664(Tnfrsf13c),ENSRNOG00000020501(Tjp3),ENSRNOG00000039048(Cd200r1),ENSRNOG00000002776(Sell),ENSRNOG00000003537(Spta1),ENSRNOG00000038835(Cd86),ENSRNOG00000033215(RT1-Db1),ENSRNOG00000029386(RT1-N2),ENSRNOG00000001224(Itgb2),ENSRNOG00000005903(St14),ENSRNOG00000005807(Ptpn7),ENSRN…	ENSRNOG00000013791(Enpp3),ENSRNOG00000006010(Slc6a20),ENSRNOG00000002265(Casr),ENSRNOG00000047706(RT1-CE16),ENSRNOG00000012995(Gpr165),ENSRNOG00000028598(Edar),	1.17982	0.321685	1
GO:0017111	nucleoside-triphosphatase activity	molecular_function	4	0	4	102	662	19765	-	ENSRNOG00000021713(Kif18b),ENSRNOG00000053047(Top2a),ENSRNOG00000060356(Kif15),ENSRNOG00000049695(Myh1),	1.17084	0.520197	1
GO:0036094	small molecule binding	molecular_function	15	8	7	102	2493	19765	ENSRNOG00000025094(Gpr183),ENSRNOG00000031211(Acsm5),ENSRNOG00000014653(Arl11),ENSRNOG00000017421(Alpk2),ENSRNOG00000012184(Urgcp),ENSRNOG00000011659(Alpk3),ENSRNOG00000032246(Acsm3),ENSRNOG00000013973(Lcn2),	ENSRNOG00000013794(Rbp1),ENSRNOG00000025946(Igf2bp2),ENSRNOG00000049695(Myh1),ENSRNOG00000060356(Kif15),ENSRNOG00000025608(Lrat),ENSRNOG00000021713(Kif18b),ENSRNOG00000053047(Top2a),	1.16591	0.451075	1
GO:0005886	plasma membrane	cellular_component	28	22	6	102	4654	19765	ENSRNOG00000008816(Gpnmb),ENSRNOG00000025094(Gpr183),ENSRNOG00000016294(Cd4),ENSRNOG00000039048(Cd200r1),ENSRNOG00000020501(Tjp3),ENSRNOG00000007664(Tnfrsf13c),ENSRNOG00000053332(Cdh26),ENSRNOG00000002776(Sell),ENSRNOG00000033215(RT1-Db1),ENSRNOG00000038835(Cd86),ENSRNOG00000005903(St14),ENSRNOG00000001224(Itgb2),ENSRNOG00000029386(RT1-N2),ENSRNOG00000018735(Cd74),ENSRNOG00000005807(Ptpn7),ENSRNO…	ENSRNOG00000013791(Enpp3),ENSRNOG00000006010(Slc6a20),ENSRNOG00000002265(Casr),ENSRNOG00000047706(RT1-CE16),ENSRNOG00000012995(Gpr165),ENSRNOG00000028598(Edar),	1.16581	0.35856	1
GO:0050896	response to stimulus	biological_process	49	25	24	102	8172	19765	ENSRNOG00000016294(Cd4),ENSRNOG00000025094(Gpr183),ENSRNOG00000014653(Arl11),ENSRNOG00000050325(Emr4),ENSRNOG00000002776(Sell),ENSRNOG00000013973(Lcn2),ENSRNOG00000007664(Tnfrsf13c),ENSRNOG00000000443(C4a),ENSRNOG00000043311(Birc7),ENSRNOG00000046452(Fcgr2b),ENSRNOG00000018735(Cd74),ENSRNOG00000001224(Itgb2),ENSRNOG00000029386(RT1-N2),ENSRNOG00000026989(Gapt),ENSRNOG00000033215(RT1-Db1),ENSRNOG00…	ENSRNOG00000028036(Adamts7),ENSRNOG00000013794(Rbp1),ENSRNOG00000013791(Enpp3),ENSRNOG00000020246(Myl9),ENSRNOG00000012049(Sox7),ENSRNOG00000001865(Serpind1),ENSRNOG00000004865(Pkd1l1),ENSRNOG00000025608(Lrat),ENSRNOG00000059500(Cdkn1c),ENSRNOG00000020369(Igf2),ENSRNOG00000053047(Top2a),ENSRNOG00000003357(Col3a1),ENSRNOG00000008680(Loxl1),ENSRNOG00000011360(Dkk2),ENSRNOG00000015921(Esco2),ENSRNOG…	1.16189	0.263043	1
GO:0040012	regulation of locomotion	biological_process	4	1	3	102	670	19765	ENSRNOG00000018735(Cd74),	ENSRNOG00000002265(Casr),ENSRNOG00000003357(Col3a1),ENSRNOG00000003897(Col1a1),	1.15686	0.535614	1
GO:0031328	positive regulation of cellular biosynthetic process	biological_process	9	3	6	102	1513	19765	ENSRNOG00000015860(Gipr),ENSRNOG00000007664(Tnfrsf13c),ENSRNOG00000001224(Itgb2),	ENSRNOG00000004610(Lum),ENSRNOG00000012049(Sox7),ENSRNOG00000003897(Col1a1),ENSRNOG00000020369(Igf2),ENSRNOG00000053047(Top2a),ENSRNOG00000059500(Cdkn1c),	1.15266	0.521709	1
GO:0005524	ATP binding	molecular_function	8	4	4	102	1353	19765	ENSRNOG00000032246(Acsm3),ENSRNOG00000011659(Alpk3),ENSRNOG00000017421(Alpk2),ENSRNOG00000031211(Acsm5),	ENSRNOG00000021713(Kif18b),ENSRNOG00000053047(Top2a),ENSRNOG00000060356(Kif15),ENSRNOG00000049695(Myh1),	1.14575	0.539239	1
GO:0051246	regulation of protein metabolic process	biological_process	13	8	5	102	2201	19765	ENSRNOG00000025094(Gpr183),ENSRNOG00000018735(Cd74),ENSRNOG00000016294(Cd4),ENSRNOG00000001224(Itgb2),ENSRNOG00000000443(C4a),ENSRNOG00000007664(Tnfrsf13c),ENSRNOG00000043311(Birc7),ENSRNOG00000046834(C3),	ENSRNOG00000001865(Serpind1),ENSRNOG00000012049(Sox7),ENSRNOG00000020369(Igf2),ENSRNOG00000048297(Qk),ENSRNOG00000059500(Cdkn1c),	1.14451	0.507714	1
GO:0001883	purine nucleoside binding	molecular_function	10	6	4	102	1703	19765	ENSRNOG00000014653(Arl11),ENSRNOG00000031211(Acsm5),ENSRNOG00000011659(Alpk3),ENSRNOG00000012184(Urgcp),ENSRNOG00000032246(Acsm3),ENSRNOG00000017421(Alpk2),	ENSRNOG00000053047(Top2a),ENSRNOG00000060356(Kif15),ENSRNOG00000049695(Myh1),ENSRNOG00000021713(Kif18b),	1.13784	0.540419	1
GO:0032549	ribonucleoside binding	molecular_function	10	6	4	102	1703	19765	ENSRNOG00000032246(Acsm3),ENSRNOG00000011659(Alpk3),ENSRNOG00000012184(Urgcp),ENSRNOG00000017421(Alpk2),ENSRNOG00000014653(Arl11),ENSRNOG00000031211(Acsm5),	ENSRNOG00000021713(Kif18b),ENSRNOG00000049695(Myh1),ENSRNOG00000053047(Top2a),ENSRNOG00000060356(Kif15),	1.13784	0.540419	1
GO:0004872	receptor activity	molecular_function	15	10	5	102	2559	19765	ENSRNOG00000016294(Cd4),ENSRNOG00000018735(Cd74),ENSRNOG00000025094(Gpr183),ENSRNOG00000001224(Itgb2),ENSRNOG00000050325(Emr4),ENSRNOG00000015860(Gipr),ENSRNOG00000026306(Clec5a),ENSRNOG00000008736(Slamf8),ENSRNOG00000004698(Cd244),ENSRNOG00000009260(Cnr2),	ENSRNOG00000013791(Enpp3),ENSRNOG00000002265(Casr),ENSRNOG00000028598(Edar),ENSRNOG00000012995(Gpr165),ENSRNOG00000013426(Mrgprf),	1.13584	0.511591	1
GO:0032268	regulation of cellular protein metabolic process	biological_process	12	7	5	102	2050	19765	ENSRNOG00000016294(Cd4),ENSRNOG00000025094(Gpr183),ENSRNOG00000018735(Cd74),ENSRNOG00000001224(Itgb2),ENSRNOG00000046834(C3),ENSRNOG00000000443(C4a),ENSRNOG00000043311(Birc7),	ENSRNOG00000001865(Serpind1),ENSRNOG00000012049(Sox7),ENSRNOG00000059500(Cdkn1c),ENSRNOG00000020369(Igf2),ENSRNOG00000048297(Qk),	1.13429	0.534376	1
GO:0042802	identical protein binding	molecular_function	6	4	2	102	1025	19765	ENSRNOG00000013973(Lcn2),ENSRNOG00000012723(Trim55),ENSRNOG00000016294(Cd4),ENSRNOG00000020845(Tyrobp),	ENSRNOG00000053047(Top2a),ENSRNOG00000003897(Col1a1),	1.13429	0.564695	1
GO:0019538	protein metabolic process	biological_process	29	15	14	102	4955	19765	ENSRNOG00000002459(Fbxo40),ENSRNOG00000005903(St14),ENSRNOG00000001224(Itgb2),ENSRNOG00000018735(Cd74),ENSRNOG00000005807(Ptpn7),ENSRNOG00000046834(C3),ENSRNOG00000002031(Naa11),ENSRNOG00000025094(Gpr183),ENSRNOG00000016294(Cd4),ENSRNOG00000043311(Birc7),ENSRNOG00000007664(Tnfrsf13c),ENSRNOG00000000443(C4a),ENSRNOG00000017421(Alpk2),ENSRNOG00000011718(C1rl),ENSRNOG00000011659(Alpk3),	ENSRNOG00000002265(Casr),ENSRNOG00000015921(Esco2),ENSRNOG00000042860(Pappa2),ENSRNOG00000001865(Serpind1),ENSRNOG00000012049(Sox7),ENSRNOG00000030726(Asgr2),ENSRNOG00000028036(Adamts7),ENSRNOG00000048297(Qk),ENSRNOG00000003357(Col3a1),ENSRNOG00000020369(Igf2),ENSRNOG00000059500(Cdkn1c),ENSRNOG00000022610(Agbl1),ENSRNOG00000004882(Capn6),ENSRNOG00000015902(Cpxm2),	1.1341	0.430858	1
GO:0001882	nucleoside binding	molecular_function	10	6	4	102	1709	19765	ENSRNOG00000017421(Alpk2),ENSRNOG00000012184(Urgcp),ENSRNOG00000011659(Alpk3),ENSRNOG00000032246(Acsm3),ENSRNOG00000031211(Acsm5),ENSRNOG00000014653(Arl11),	ENSRNOG00000021713(Kif18b),ENSRNOG00000060356(Kif15),ENSRNOG00000053047(Top2a),ENSRNOG00000049695(Myh1),	1.13385	0.547576	1
GO:0045595	regulation of cell differentiation	biological_process	8	3	5	102	1379	19765	ENSRNOG00000000451(RT1-Ba),ENSRNOG00000018735(Cd74),ENSRNOG00000020845(Tyrobp),	ENSRNOG00000003357(Col3a1),ENSRNOG00000013791(Enpp3),ENSRNOG00000013794(Rbp1),ENSRNOG00000003897(Col1a1),ENSRNOG00000028036(Adamts7),	1.12415	0.574408	1
GO:0030554	adenyl nucleotide binding	molecular_function	8	4	4	102	1385	19765	ENSRNOG00000031211(Acsm5),ENSRNOG00000017421(Alpk2),ENSRNOG00000032246(Acsm3),ENSRNOG00000011659(Alpk3),	ENSRNOG00000060356(Kif15),ENSRNOG00000053047(Top2a),ENSRNOG00000049695(Myh1),ENSRNOG00000021713(Kif18b),	1.11928	0.582611	1
GO:0017076	purine nucleotide binding	molecular_function	10	6	4	102	1733	19765	ENSRNOG00000031211(Acsm5),ENSRNOG00000014653(Arl11),ENSRNOG00000017421(Alpk2),ENSRNOG00000032246(Acsm3),ENSRNOG00000012184(Urgcp),ENSRNOG00000011659(Alpk3),	ENSRNOG00000049695(Myh1),ENSRNOG00000053047(Top2a),ENSRNOG00000060356(Kif15),ENSRNOG00000021713(Kif18b),	1.11814	0.576493	1
GO:0006796	phosphate-containing compound metabolic process	biological_process	15	10	5	102	2606	19765	ENSRNOG00000025094(Gpr183),ENSRNOG00000005807(Ptpn7),ENSRNOG00000018735(Cd74),ENSRNOG00000016294(Cd4),ENSRNOG00000001224(Itgb2),ENSRNOG00000008736(Slamf8),ENSRNOG00000011659(Alpk3),ENSRNOG00000015860(Gipr),ENSRNOG00000017421(Alpk2),ENSRNOG00000046834(C3),	ENSRNOG00000013791(Enpp3),ENSRNOG00000002265(Casr),ENSRNOG00000022273(RGD1563242),ENSRNOG00000020369(Igf2),ENSRNOG00000059500(Cdkn1c),	1.11536	0.556447	1
GO:0043168	anion binding	molecular_function	14	7	7	102	2441	19765	ENSRNOG00000017421(Alpk2),ENSRNOG00000011659(Alpk3),ENSRNOG00000012184(Urgcp),ENSRNOG00000032246(Acsm3),ENSRNOG00000031211(Acsm5),ENSRNOG00000014653(Arl11),ENSRNOG00000008816(Gpnmb),	ENSRNOG00000021713(Kif18b),ENSRNOG00000053047(Top2a),ENSRNOG00000001865(Serpind1),ENSRNOG00000060356(Kif15),ENSRNOG00000025608(Lrat),ENSRNOG00000001627(Abi3bp),ENSRNOG00000049695(Myh1),	1.11137	0.570644	1
GO:0010557	positive regulation of macromolecule biosynthetic process	biological_process	8	2	6	102	1395	19765	ENSRNOG00000007664(Tnfrsf13c),ENSRNOG00000001224(Itgb2),	ENSRNOG00000053047(Top2a),ENSRNOG00000020369(Igf2),ENSRNOG00000059500(Cdkn1c),ENSRNOG00000012049(Sox7),ENSRNOG00000004610(Lum),ENSRNOG00000003897(Col1a1),	1.11125	0.596347	1
GO:0008219	cell death	biological_process	9	5	4	102	1582	19765	ENSRNOG00000018735(Cd74),ENSRNOG00000046452(Fcgr2b),ENSRNOG00000026306(Clec5a),ENSRNOG00000043311(Birc7),ENSRNOG00000013973(Lcn2),	ENSRNOG00000012049(Sox7),ENSRNOG00000022273(RGD1563242),ENSRNOG00000053047(Top2a),ENSRNOG00000002265(Casr),	1.10238	0.60972	1
GO:0045893	positive regulation of transcription, DNA-templated	biological_process	7	1	6	102	1232	19765	ENSRNOG00000001224(Itgb2),	ENSRNOG00000053047(Top2a),ENSRNOG00000020369(Igf2),ENSRNOG00000059500(Cdkn1c),ENSRNOG00000012049(Sox7),ENSRNOG00000004610(Lum),ENSRNOG00000003897(Col1a1),	1.10099	0.615139	1
GO:0006793	phosphorus metabolic process	biological_process	15	10	5	102	2642	19765	ENSRNOG00000005807(Ptpn7),ENSRNOG00000018735(Cd74),ENSRNOG00000025094(Gpr183),ENSRNOG00000016294(Cd4),ENSRNOG00000001224(Itgb2),ENSRNOG00000015860(Gipr),ENSRNOG00000017421(Alpk2),ENSRNOG00000008736(Slamf8),ENSRNOG00000011659(Alpk3),ENSRNOG00000046834(C3),	ENSRNOG00000013791(Enpp3),ENSRNOG00000002265(Casr),ENSRNOG00000022273(RGD1563242),ENSRNOG00000020369(Igf2),ENSRNOG00000059500(Cdkn1c),	1.10016	0.591667	1
GO:0051247	positive regulation of protein metabolic process	biological_process	7	5	2	102	1233	19765	ENSRNOG00000016294(Cd4),ENSRNOG00000018735(Cd74),ENSRNOG00000025094(Gpr183),ENSRNOG00000046834(C3),ENSRNOG00000007664(Tnfrsf13c),	ENSRNOG00000012049(Sox7),ENSRNOG00000020369(Igf2),	1.1001	0.616627	1
GO:0006461	protein complex assembly	biological_process	6	3	3	102	1060	19765	ENSRNOG00000013973(Lcn2),ENSRNOG00000032844(RT1-Da),ENSRNOG00000018735(Cd74),	ENSRNOG00000049695(Myh1),ENSRNOG00000021555(Mis18a),ENSRNOG00000003897(Col1a1),	1.09684	0.62064	1
GO:0060341	regulation of cellular localization	biological_process	6	3	3	102	1063	19765	ENSRNOG00000015860(Gipr),ENSRNOG00000016294(Cd4),ENSRNOG00000026306(Clec5a),	ENSRNOG00000021555(Mis18a),ENSRNOG00000002265(Casr),ENSRNOG00000028598(Edar),	1.09374	0.625486	1
GO:1902531	regulation of intracellular signal transduction	biological_process	7	4	3	102	1250	19765	ENSRNOG00000046834(C3),ENSRNOG00000018735(Cd74),ENSRNOG00000025094(Gpr183),ENSRNOG00000016294(Cd4),	ENSRNOG00000003357(Col3a1),ENSRNOG00000020369(Igf2),ENSRNOG00000028598(Edar),	1.08514	0.642033	1
GO:0019222	regulation of metabolic process	biological_process	30	16	14	102	5370	19765	ENSRNOG00000042220(Vsx1),ENSRNOG00000025094(Gpr183),ENSRNOG00000016294(Cd4),ENSRNOG00000043311(Birc7),ENSRNOG00000007664(Tnfrsf13c),ENSRNOG00000000443(C4a),ENSRNOG00000013973(Lcn2),ENSRNOG00000003544(Tbx4),ENSRNOG00000057901(AC126537.1),ENSRNOG00000001224(Itgb2),ENSRNOG00000018735(Cd74),ENSRNOG00000020400(Mef2b),ENSRNOG00000009260(Cnr2),ENSRNOG00000046834(C3),ENSRNOG00000015860(Gipr),ENSRNOG00000…	ENSRNOG00000012049(Sox7),ENSRNOG00000001865(Serpind1),ENSRNOG00000053047(Top2a),ENSRNOG00000048297(Qk),ENSRNOG00000020369(Igf2),ENSRNOG00000021555(Mis18a),ENSRNOG00000059500(Cdkn1c),ENSRNOG00000022273(RGD1563242),ENSRNOG00000002265(Casr),ENSRNOG00000015921(Esco2),ENSRNOG00000058437(Hist1h2ac),ENSRNOG00000004610(Lum),ENSRNOG00000003897(Col1a1),ENSRNOG00000028598(Edar),	1.08254	0.582248	1
GO:0010468	regulation of gene expression	biological_process	18	8	10	102	3247	19765	ENSRNOG00000020400(Mef2b),ENSRNOG00000057901(AC126537.1),ENSRNOG00000042220(Vsx1),ENSRNOG00000001224(Itgb2),ENSRNOG00000003544(Tbx4),ENSRNOG00000043311(Birc7),ENSRNOG00000013973(Lcn2),ENSRNOG00000046834(C3),	ENSRNOG00000058437(Hist1h2ac),ENSRNOG00000012049(Sox7),ENSRNOG00000002265(Casr),ENSRNOG00000004610(Lum),ENSRNOG00000028598(Edar),ENSRNOG00000003897(Col1a1),ENSRNOG00000020369(Igf2),ENSRNOG00000048297(Qk),ENSRNOG00000053047(Top2a),ENSRNOG00000059500(Cdkn1c),	1.0742	0.64765	1
GO:0048468	cell development	biological_process	10	6	4	102	1805	19765	ENSRNOG00000011659(Alpk3),ENSRNOG00000026306(Clec5a),ENSRNOG00000020845(Tyrobp),ENSRNOG00000005903(St14),ENSRNOG00000042220(Vsx1),ENSRNOG00000015368(Pdilt),	ENSRNOG00000003897(Col1a1),ENSRNOG00000059500(Cdkn1c),ENSRNOG00000003357(Col3a1),ENSRNOG00000048297(Qk),	1.07354	0.665572	1
GO:0036211	protein modification process	biological_process	17	11	6	102	3069	19765	ENSRNOG00000017421(Alpk2),ENSRNOG00000011659(Alpk3),ENSRNOG00000002031(Naa11),ENSRNOG00000046834(C3),ENSRNOG00000043311(Birc7),ENSRNOG00000016294(Cd4),ENSRNOG00000005807(Ptpn7),ENSRNOG00000018735(Cd74),ENSRNOG00000025094(Gpr183),ENSRNOG00000001224(Itgb2),ENSRNOG00000002459(Fbxo40),	ENSRNOG00000059500(Cdkn1c),ENSRNOG00000022610(Agbl1),ENSRNOG00000003357(Col3a1),ENSRNOG00000020369(Igf2),ENSRNOG00000015921(Esco2),ENSRNOG00000002265(Casr),	1.07337	0.652721	1
GO:0006464	cellular protein modification process	biological_process	17	11	6	102	3069	19765	ENSRNOG00000043311(Birc7),ENSRNOG00000046834(C3),ENSRNOG00000002031(Naa11),ENSRNOG00000011659(Alpk3),ENSRNOG00000017421(Alpk2),ENSRNOG00000002459(Fbxo40),ENSRNOG00000001224(Itgb2),ENSRNOG00000025094(Gpr183),ENSRNOG00000018735(Cd74),ENSRNOG00000005807(Ptpn7),ENSRNOG00000016294(Cd4),	ENSRNOG00000020369(Igf2),ENSRNOG00000003357(Col3a1),ENSRNOG00000022610(Agbl1),ENSRNOG00000059500(Cdkn1c),ENSRNOG00000002265(Casr),ENSRNOG00000015921(Esco2),	1.07337	0.652721	1
GO:0034613	cellular protein localization	biological_process	7	3	4	102	1271	19765	ENSRNOG00000001224(Itgb2),ENSRNOG00000037167(Rtp3),ENSRNOG00000016294(Cd4),	ENSRNOG00000021555(Mis18a),ENSRNOG00000015921(Esco2),ENSRNOG00000028598(Edar),ENSRNOG00000003897(Col1a1),	1.06721	0.673672	1
GO:0005694	chromosome	cellular_component	4	0	4	102	730	19765	-	ENSRNOG00000021555(Mis18a),ENSRNOG00000058437(Hist1h2ac),ENSRNOG00000015921(Esco2),ENSRNOG00000053047(Top2a),	1.06178	0.653829	1
GO:0018193	peptidyl-amino acid modification	biological_process	5	4	1	102	913	19765	ENSRNOG00000001224(Itgb2),ENSRNOG00000016294(Cd4),ENSRNOG00000002031(Naa11),ENSRNOG00000018735(Cd74),	ENSRNOG00000022610(Agbl1),	1.0612	0.669227	1
GO:0007610	behavior	biological_process	4	1	3	102	731	19765	ENSRNOG00000018735(Cd74),	ENSRNOG00000004632(Pmch),ENSRNOG00000002265(Casr),ENSRNOG00000020369(Igf2),	1.06033	0.655827	1
GO:0043066	negative regulation of apoptotic process	biological_process	4	4	0	102	734	19765	ENSRNOG00000018735(Cd74),ENSRNOG00000043311(Birc7),ENSRNOG00000046452(Fcgr2b),ENSRNOG00000026306(Clec5a),	-	1.05599	0.661825	1
GO:0043234	protein complex	cellular_component	19	7	12	102	3488	19765	ENSRNOG00000019728(Itgam),ENSRNOG00000032844(RT1-Da),ENSRNOG00000002031(Naa11),ENSRNOG00000033215(RT1-Db1),ENSRNOG00000001224(Itgb2),ENSRNOG00000029386(RT1-N2),ENSRNOG00000018735(Cd74),	ENSRNOG00000053047(Top2a),ENSRNOG00000021713(Kif18b),ENSRNOG00000004610(Lum),ENSRNOG00000003897(Col1a1),ENSRNOG00000060356(Kif15),ENSRNOG00000047706(RT1-CE16),ENSRNOG00000004865(Pkd1l1),ENSRNOG00000049695(Myh1),ENSRNOG00000058437(Hist1h2ac),ENSRNOG00000061359(AABR07028009.1),ENSRNOG00000020246(Myl9),ENSRNOG00000010841(Col8a2),	1.05554	0.69959	1
GO:0031401	positive regulation of protein modification process	biological_process	5	4	1	102	918	19765	ENSRNOG00000025094(Gpr183),ENSRNOG00000018735(Cd74),ENSRNOG00000016294(Cd4),ENSRNOG00000046834(C3),	ENSRNOG00000020369(Igf2),	1.05542	0.678191	1
GO:0031325	positive regulation of cellular metabolic process	biological_process	13	7	6	102	2411	19765	ENSRNOG00000016294(Cd4),ENSRNOG00000018735(Cd74),ENSRNOG00000025094(Gpr183),ENSRNOG00000001224(Itgb2),ENSRNOG00000015860(Gipr),ENSRNOG00000046834(C3),ENSRNOG00000007664(Tnfrsf13c),	ENSRNOG00000012049(Sox7),ENSRNOG00000003897(Col1a1),ENSRNOG00000004610(Lum),ENSRNOG00000059500(Cdkn1c),ENSRNOG00000053047(Top2a),ENSRNOG00000020369(Igf2),	1.04482	0.73321	1
GO:0043069	negative regulation of programmed cell death	biological_process	4	4	0	102	748	19765	ENSRNOG00000018735(Cd74),ENSRNOG00000043311(Birc7),ENSRNOG00000046452(Fcgr2b),ENSRNOG00000026306(Clec5a),	-	1.03623	0.689876	1
GO:0016020	membrane	cellular_component	49	31	18	102	9170	19765	ENSRNOG00000004698(Cd244),ENSRNOG00000015860(Gipr),ENSRNOG00000037167(Rtp3),ENSRNOG00000026306(Clec5a),ENSRNOG00000000451(RT1-Ba),ENSRNOG00000005903(St14),ENSRNOG00000029386(RT1-N2),ENSRNOG00000033215(RT1-Db1),ENSRNOG00000026989(Gapt),ENSRNOG00000046452(Fcgr2b),ENSRNOG00000046683(RGD1566307),ENSRNOG00000018735(Cd74),ENSRNOG00000002776(Sell),ENSRNOG00000042628(RGD1561145),ENSRNOG00000050325(Emr4),…	ENSRNOG00000013426(Mrgprf),ENSRNOG00000004273(Ifitm1),ENSRNOG00000025670(Shisa3),ENSRNOG00000006010(Slc6a20),ENSRNOG00000013791(Enpp3),ENSRNOG00000052130(AABR07041724.1),ENSRNOG00000015972(Ano5),ENSRNOG00000028598(Edar),ENSRNOG00000012995(Gpr165),ENSRNOG00000022239(Tusc5),ENSRNOG00000047706(RT1-CE16),ENSRNOG00000002265(Casr),ENSRNOG00000060356(Kif15),ENSRNOG00000020953(Ms4a7),ENSRNOG00000020369(I…	1.03544	0.736274	1
GO:0008152	metabolic process	biological_process	57	28	29	102	10679	19765	ENSRNOG00000016294(Cd4),ENSRNOG00000042220(Vsx1),ENSRNOG00000011659(Alpk3),ENSRNOG00000003537(Spta1),ENSRNOG00000011718(C1rl),ENSRNOG00000007664(Tnfrsf13c),ENSRNOG00000000443(C4a),ENSRNOG00000043311(Birc7),ENSRNOG00000013973(Lcn2),ENSRNOG00000005807(Ptpn7),ENSRNOG00000002459(Fbxo40),ENSRNOG00000001224(Itgb2),ENSRNOG00000008736(Slamf8),ENSRNOG00000009260(Cnr2),ENSRNOG00000025094(Gpr183),ENSRNOG000…	ENSRNOG00000030726(Asgr2),ENSRNOG00000012049(Sox7),ENSRNOG00000028036(Adamts7),ENSRNOG00000025608(Lrat),ENSRNOG00000042860(Pappa2),ENSRNOG00000026177(Mgam),ENSRNOG00000022273(RGD1563242),ENSRNOG00000020369(Igf2),ENSRNOG00000053047(Top2a),ENSRNOG00000048297(Qk),ENSRNOG00000004882(Capn6),ENSRNOG00000021555(Mis18a),ENSRNOG00000022610(Agbl1),ENSRNOG00000008680(Loxl1),ENSRNOG00000002265(Casr),ENSRNOG0…	1.03429	0.733421	1
GO:0005515	protein binding	molecular_function	47	21	26	102	8871	19765	ENSRNOG00000003544(Tbx4),ENSRNOG00000002776(Sell),ENSRNOG00000000451(RT1-Ba),ENSRNOG00000037167(Rtp3),ENSRNOG00000026306(Clec5a),ENSRNOG00000012723(Trim55),ENSRNOG00000015368(Pdilt),ENSRNOG00000046834(C3),ENSRNOG00000018735(Cd74),ENSRNOG00000020400(Mef2b),ENSRNOG00000046452(Fcgr2b),ENSRNOG00000003537(Spta1),ENSRNOG00000013973(Lcn2),ENSRNOG00000016294(Cd4),ENSRNOG00000008816(Gpnmb),ENSRNOG00000014…	ENSRNOG00000021713(Kif18b),ENSRNOG00000003357(Col3a1),ENSRNOG00000059500(Cdkn1c),ENSRNOG00000004632(Pmch),ENSRNOG00000006010(Slc6a20),ENSRNOG00000025670(Shisa3),ENSRNOG00000004610(Lum),ENSRNOG00000058437(Hist1h2ac),ENSRNOG00000049695(Myh1),ENSRNOG00000022273(RGD1563242),ENSRNOG00000020369(Igf2),ENSRNOG00000048297(Qk),ENSRNOG00000053047(Top2a),ENSRNOG00000004882(Capn6),ENSRNOG00000022610(Agbl1),EN…	1.02665	0.782588	1
GO:0031323	regulation of cellular metabolic process	biological_process	25	14	11	102	4735	19765	ENSRNOG00000015860(Gipr),ENSRNOG00000008736(Slamf8),ENSRNOG00000046834(C3),ENSRNOG00000020400(Mef2b),ENSRNOG00000018735(Cd74),ENSRNOG00000001224(Itgb2),ENSRNOG00000057901(AC126537.1),ENSRNOG00000003544(Tbx4),ENSRNOG00000043311(Birc7),ENSRNOG00000007664(Tnfrsf13c),ENSRNOG00000000443(C4a),ENSRNOG00000016294(Cd4),ENSRNOG00000025094(Gpr183),ENSRNOG00000042220(Vsx1),	ENSRNOG00000003897(Col1a1),ENSRNOG00000004610(Lum),ENSRNOG00000015921(Esco2),ENSRNOG00000058437(Hist1h2ac),ENSRNOG00000021555(Mis18a),ENSRNOG00000059500(Cdkn1c),ENSRNOG00000053047(Top2a),ENSRNOG00000048297(Qk),ENSRNOG00000020369(Igf2),ENSRNOG00000012049(Sox7),ENSRNOG00000001865(Serpind1),	1.0231	0.805629	1
GO:0008104	protein localization	biological_process	10	5	5	102	1900	19765	ENSRNOG00000015860(Gipr),ENSRNOG00000016294(Cd4),ENSRNOG00000037167(Rtp3),ENSRNOG00000026306(Clec5a),ENSRNOG00000001224(Itgb2),	ENSRNOG00000003897(Col1a1),ENSRNOG00000028598(Edar),ENSRNOG00000015921(Esco2),ENSRNOG00000021555(Mis18a),ENSRNOG00000002265(Casr),	1.01987	0.786622	1
GO:0032270	positive regulation of cellular protein metabolic process	biological_process	6	4	2	102	1142	19765	ENSRNOG00000025094(Gpr183),ENSRNOG00000018735(Cd74),ENSRNOG00000016294(Cd4),ENSRNOG00000046834(C3),	ENSRNOG00000012049(Sox7),ENSRNOG00000020369(Igf2),	1.01808	0.754915	1
GO:0005856	cytoskeleton	cellular_component	8	2	6	102	1535	19765	ENSRNOG00000003537(Spta1),ENSRNOG00000005807(Ptpn7),	ENSRNOG00000004882(Capn6),ENSRNOG00000049695(Myh1),ENSRNOG00000060356(Kif15),ENSRNOG00000053047(Top2a),ENSRNOG00000020246(Myl9),ENSRNOG00000021713(Kif18b),	1.0099	0.794507	1
GO:0051641	cellular localization	biological_process	12	7	5	102	2308	19765	ENSRNOG00000026306(Clec5a),ENSRNOG00000037167(Rtp3),ENSRNOG00000015860(Gipr),ENSRNOG00000013973(Lcn2),ENSRNOG00000016294(Cd4),ENSRNOG00000046452(Fcgr2b),ENSRNOG00000001224(Itgb2),	ENSRNOG00000028598(Edar),ENSRNOG00000003897(Col1a1),ENSRNOG00000021555(Mis18a),ENSRNOG00000015921(Esco2),ENSRNOG00000002265(Casr),	1.00749	0.828886	1
GO:0050794	regulation of cellular process	biological_process	51	27	24	102	9840	19765	ENSRNOG00000003544(Tbx4),ENSRNOG00000025094(Gpr183),ENSRNOG00000050325(Emr4),ENSRNOG00000026306(Clec5a),ENSRNOG00000000451(RT1-Ba),ENSRNOG00000015860(Gipr),ENSRNOG00000046834(C3),ENSRNOG00000015368(Pdilt),ENSRNOG00000020400(Mef2b),ENSRNOG00000046452(Fcgr2b),ENSRNOG00000018735(Cd74),ENSRNOG00000057901(AC126537.1),ENSRNOG00000003537(Spta1),ENSRNOG00000013973(Lcn2),ENSRNOG00000007664(Tnfrsf13c),ENSR…	ENSRNOG00000021713(Kif18b),ENSRNOG00000059500(Cdkn1c),ENSRNOG00000003357(Col3a1),ENSRNOG00000013791(Enpp3),ENSRNOG00000013794(Rbp1),ENSRNOG00000001865(Serpind1),ENSRNOG00000004610(Lum),ENSRNOG00000013426(Mrgprf),ENSRNOG00000058437(Hist1h2ac),ENSRNOG00000015921(Esco2),ENSRNOG00000004882(Capn6),ENSRNOG00000021555(Mis18a),ENSRNOG00000020369(Igf2),ENSRNOG00000053047(Top2a),ENSRNOG00000048297(Qk),ENSR…	1.00432	0.901878	1
