# Supplementary material for: LncRNAs down-regulate Myh1, Casr, and Mis18a expression in the Substantia Nigra of aged male rats
Source: Aging (Albany NY). 2019 Oct 2;11(19):8313–28. doi: 10.18632/aging.102321 (PMC6814601; doi:10.18632/aging.102321)
Supplement: Supplementary Table 8 [file aging-11-102321-s007.xlsx]

## Sheet: Table 8
pathway_3	pathway_3_num	all_diff_gene_list	pathway_2	pathway_2_num	pathway_1	pathway_1_num
Purine metabolism	1	ENSRNOG00000013791(Enpp3),	Nucleotide metabolism	1	Metabolism	5
Pantothenate and CoA biosynthesis	1	ENSRNOG00000013791(Enpp3),	Metabolism of cofactors and vitamins	3	Metabolism	5
Riboflavin metabolism	1	ENSRNOG00000022273(RGD1563242),	Metabolism of cofactors and vitamins	3	Metabolism	5
Retinol metabolism	1	ENSRNOG00000025608(Lrat),	Metabolism of cofactors and vitamins	3	Metabolism	5
Nicotinate and nicotinamide metabolism	1	ENSRNOG00000013791(Enpp3),	Metabolism of cofactors and vitamins	3	Metabolism	5
Starch and sucrose metabolism	1	ENSRNOG00000013791(Enpp3),	Carbohydrate metabolism	3	Metabolism	5
Butanoate metabolism	2	ENSRNOG00000031211(Acsm5),ENSRNOG00000032246(Acsm3),	Carbohydrate metabolism	3	Metabolism	5
Metabolic pathways	4	ENSRNOG00000031211(Acsm5),ENSRNOG00000022273(RGD1563242),ENSRNOG00000013791(Enpp3),ENSRNOG00000032246(Acsm3),	Global and overview maps	4	Metabolism	5
Neuroactive ligand-receptor interaction	2	ENSRNOG00000009260(Cnr2),ENSRNOG00000015860(Gipr),	Signaling molecules and interaction	5	Environmental Information Processing	11
Cytokine-cytokine receptor interaction	2	ENSRNOG00000028598(Edar),ENSRNOG00000007664(Tnfrsf13c),	Signaling molecules and interaction	5	Environmental Information Processing	11
ECM-receptor interaction	1	ENSRNOG00000003897(Col1a1),	Signaling molecules and interaction	5	Environmental Information Processing	11
MAPK signaling pathway	1	ENSRNOG00000005807(Ptpn7),	Signal transduction	9	Environmental Information Processing	11
cGMP-PKG signaling pathway	2	ENSRNOG00000020400(Mef2b),ENSRNOG00000020246(Myl9),	Signal transduction	9	Environmental Information Processing	11
cAMP signaling pathway	2	ENSRNOG00000020246(Myl9),ENSRNOG00000015860(Gipr),	Signal transduction	9	Environmental Information Processing	11
Wnt signaling pathway	1	ENSRNOG00000011360(Dkk2),	Signal transduction	9	Environmental Information Processing	11
Rap1 signaling pathway	2	ENSRNOG00000001224(Itgb2),ENSRNOG00000019728(Itgam),	Signal transduction	9	Environmental Information Processing	11
NF-kappa B signaling pathway	1	ENSRNOG00000007664(Tnfrsf13c),	Signal transduction	9	Environmental Information Processing	11
PI3K-Akt signaling pathway	1	ENSRNOG00000003897(Col1a1),	Signal transduction	9	Environmental Information Processing	11
Hippo signaling pathway	1	ENSRNOG00000001224(Itgb2),	Signal transduction	9	Environmental Information Processing	11
Focal adhesion	2	ENSRNOG00000020246(Myl9),ENSRNOG00000003897(Col1a1),	Cellular community	4	Cellular Processes	14
Tight junction	3	ENSRNOG00000020501(Tjp3),ENSRNOG00000049695(Myh1),ENSRNOG00000020246(Myl9),	Cellular community	4	Cellular Processes	14
Endocytosis	1	ENSRNOG00000029386(RT1-N2),	Transport and catabolism	8	Cellular Processes	14
Phagosome	8	ENSRNOG00000046452(Fcgr2b),ENSRNOG00000001224(Itgb2),ENSRNOG00000032844(RT1-Da),ENSRNOG00000000451(RT1-Ba),ENSRNOG00000029386(RT1-N2),ENSRNOG00000019728(Itgam),ENSRNOG00000046834(C3),ENSRNOG00000033215(RT1-Db1),	Transport and catabolism	8	Cellular Processes	14
Apoptosis	1	ENSRNOG00000003537(Spta1),	Cell growth and death	2	Cellular Processes	14
Cell cycle	1	ENSRNOG00000059500(Cdkn1c),	Cell growth and death	2	Cellular Processes	14
Regulation of actin cytoskeleton	3	ENSRNOG00000001224(Itgb2),ENSRNOG00000019728(Itgam),ENSRNOG00000020246(Myl9),	Cell motility	3	Cellular Processes	14
Vascular smooth muscle contraction	1	ENSRNOG00000020246(Myl9),	Circulatory system	1	Organismal Systems	22
Oxytocin signaling pathway	1	ENSRNOG00000020246(Myl9),	Endocrine system	2	Organismal Systems	22
Thyroid hormone synthesis	1	ENSRNOG00000030726(Asgr2),	Endocrine system	2	Organismal Systems	22
Vitamin digestion and absorption	1	ENSRNOG00000025608(Lrat),	Digestive system	3	Organismal Systems	22
Protein digestion and absorption	2	ENSRNOG00000003357(Col3a1),ENSRNOG00000003897(Col1a1),	Digestive system	3	Organismal Systems	22
Platelet activation	2	ENSRNOG00000003357(Col3a1),ENSRNOG00000003897(Col1a1),	Immune system	19	Organismal Systems	22
Fc gamma R-mediated phagocytosis	1	ENSRNOG00000046452(Fcgr2b),	Immune system	19	Organismal Systems	22
B cell receptor signaling pathway	2	ENSRNOG00000046452(Fcgr2b),ENSRNOG00000004273(Ifitm1),	Immune system	19	Organismal Systems	22
Complement and coagulation cascades	4	ENSRNOG00000001224(Itgb2),ENSRNOG00000001865(Serpind1),ENSRNOG00000019728(Itgam),ENSRNOG00000046834(C3),	Immune system	19	Organismal Systems	22
Leukocyte transendothelial migration	3	ENSRNOG00000001224(Itgb2),ENSRNOG00000019728(Itgam),ENSRNOG00000020246(Myl9),	Immune system	19	Organismal Systems	22
Hematopoietic cell lineage	4	ENSRNOG00000032844(RT1-Da),ENSRNOG00000019728(Itgam),ENSRNOG00000016294(Cd4),ENSRNOG00000033215(RT1-Db1),	Immune system	19	Organismal Systems	22
Natural killer cell mediated cytotoxicity	3	ENSRNOG00000001224(Itgb2),ENSRNOG00000020845(Tyrobp),ENSRNOG00000004698(Cd244),	Immune system	19	Organismal Systems	22
Antigen processing and presentation	6	ENSRNOG00000018735(Cd74),ENSRNOG00000032844(RT1-Da),ENSRNOG00000000451(RT1-Ba),ENSRNOG00000029386(RT1-N2),ENSRNOG00000016294(Cd4),ENSRNOG00000033215(RT1-Db1),	Immune system	19	Organismal Systems	22
Intestinal immune network for IgA production	5	ENSRNOG00000032844(RT1-Da),ENSRNOG00000000451(RT1-Ba),ENSRNOG00000007664(Tnfrsf13c),ENSRNOG00000038835(Cd86),ENSRNOG00000033215(RT1-Db1),	Immune system	19	Organismal Systems	22
Toll-like receptor signaling pathway	1	ENSRNOG00000038835(Cd86),	Immune system	19	Organismal Systems	22
T cell receptor signaling pathway	1	ENSRNOG00000016294(Cd4),	Immune system	19	Organismal Systems	22
Osteoclast differentiation	3	ENSRNOG00000046452(Fcgr2b),ENSRNOG00000020845(Tyrobp),ENSRNOG00000046683(RGD1566307),	Development	3	Organismal Systems	22
Ubiquitin mediated proteolysis	1	ENSRNOG00000043311(Birc7),	Folding, sorting and degradation	1	Genetic Information Processing	1
