# Supplementary material for: LncRNAs down-regulate Myh1, Casr, and Mis18a expression in the Substantia Nigra of aged male rats
Source: Aging (Albany NY). 2019 Oct 2;11(19):8313–28. doi: 10.18632/aging.102321 (PMC6814601; doi:10.18632/aging.102321)
Supplement: Supplementary Table 9 [file aging-11-102321-s009.xlsx]

## Sheet: Table 9
pathway_ID	PATHWAY_DES	diff_gene_in_this_pathway	UP_GENES	DOWN_GENES	diff_gene_in_all_pathway	all_gene_in_this_pathway	all_gene_in_all_pathway	all_gene_list	gene_UP_list	gene_DOWN_list	rich_factor	Pvalue	Qvalue
rno00740	Riboflavin metabolism	1	0	1	41	4	7055	ENSRNOG00000022273(RGD1563242),	-	ENSRNOG00000022273(RGD1563242),	43.0183	1	1
rno05150	Staphylococcus aureus infection	7	7	0	41	53	7055	ENSRNOG00000046452(Fcgr2b),ENSRNOG00000001224(Itgb2),ENSRNOG00000032844(RT1-Da),ENSRNOG00000000451(RT1-Ba),ENSRNOG00000019728(Itgam),ENSRNOG00000046834(C3),ENSRNOG00000033215(RT1-Db1),	ENSRNOG00000046452(Fcgr2b),ENSRNOG00000001224(Itgb2),ENSRNOG00000032844(RT1-Da),ENSRNOG00000000451(RT1-Ba),ENSRNOG00000019728(Itgam),ENSRNOG00000046834(C3),ENSRNOG00000033215(RT1-Db1),	-	22.7266	6.56454e-09	5.0547e-07
rno04672	Intestinal immune network for IgA production	5	5	0	41	44	7055	ENSRNOG00000032844(RT1-Da),ENSRNOG00000000451(RT1-Ba),ENSRNOG00000007664(Tnfrsf13c),ENSRNOG00000038835(Cd86),ENSRNOG00000033215(RT1-Db1),	ENSRNOG00000032844(RT1-Da),ENSRNOG00000000451(RT1-Ba),ENSRNOG00000007664(Tnfrsf13c),ENSRNOG00000038835(Cd86),ENSRNOG00000033215(RT1-Db1),	-	19.5538	9.79117e-07	1.8848e-05
rno05310	Asthma	3	3	0	41	28	7055	ENSRNOG00000032844(RT1-Da),ENSRNOG00000000451(RT1-Ba),ENSRNOG00000033215(RT1-Db1),	ENSRNOG00000032844(RT1-Da),ENSRNOG00000000451(RT1-Ba),ENSRNOG00000033215(RT1-Db1),	-	18.4364	6.39314e-05	0.000328181
rno05332	Graft-versus-host disease	5	5	0	41	47	7055	ENSRNOG00000032844(RT1-Da),ENSRNOG00000000451(RT1-Ba),ENSRNOG00000029386(RT1-N2),ENSRNOG00000038835(Cd86),ENSRNOG00000033215(RT1-Db1),	ENSRNOG00000032844(RT1-Da),ENSRNOG00000000451(RT1-Ba),ENSRNOG00000029386(RT1-N2),ENSRNOG00000038835(Cd86),ENSRNOG00000033215(RT1-Db1),	-	18.3057	1.42953e-06	1.83456e-05
rno05330	Allograft rejection	5	5	0	41	49	7055	ENSRNOG00000032844(RT1-Da),ENSRNOG00000000451(RT1-Ba),ENSRNOG00000029386(RT1-N2),ENSRNOG00000038835(Cd86),ENSRNOG00000033215(RT1-Db1),	ENSRNOG00000032844(RT1-Da),ENSRNOG00000000451(RT1-Ba),ENSRNOG00000029386(RT1-N2),ENSRNOG00000038835(Cd86),ENSRNOG00000033215(RT1-Db1),	-	17.5585	1.81458e-06	1.74653e-05
rno04940	Type I diabetes mellitus	5	5	0	41	56	7055	ENSRNOG00000032844(RT1-Da),ENSRNOG00000000451(RT1-Ba),ENSRNOG00000029386(RT1-N2),ENSRNOG00000038835(Cd86),ENSRNOG00000033215(RT1-Db1),	ENSRNOG00000032844(RT1-Da),ENSRNOG00000000451(RT1-Ba),ENSRNOG00000029386(RT1-N2),ENSRNOG00000038835(Cd86),ENSRNOG00000033215(RT1-Db1),	-	15.3637	3.88354e-06	2.71848e-05
rno05320	Autoimmune thyroid disease	5	5	0	41	56	7055	ENSRNOG00000032844(RT1-Da),ENSRNOG00000000451(RT1-Ba),ENSRNOG00000029386(RT1-N2),ENSRNOG00000038835(Cd86),ENSRNOG00000033215(RT1-Db1),	ENSRNOG00000032844(RT1-Da),ENSRNOG00000000451(RT1-Ba),ENSRNOG00000029386(RT1-N2),ENSRNOG00000038835(Cd86),ENSRNOG00000033215(RT1-Db1),	-	15.3637	3.88354e-06	2.71848e-05
rno05416	Viral myocarditis	6	6	0	41	69	7055	ENSRNOG00000001224(Itgb2),ENSRNOG00000032844(RT1-Da),ENSRNOG00000000451(RT1-Ba),ENSRNOG00000029386(RT1-N2),ENSRNOG00000038835(Cd86),ENSRNOG00000033215(RT1-Db1),	ENSRNOG00000001224(Itgb2),ENSRNOG00000032844(RT1-Da),ENSRNOG00000000451(RT1-Ba),ENSRNOG00000029386(RT1-N2),ENSRNOG00000038835(Cd86),ENSRNOG00000033215(RT1-Db1),	-	14.9629	8.31437e-07	3.20103e-05
rno05140	Leishmaniasis	6	6	0	41	69	7055	ENSRNOG00000001224(Itgb2),ENSRNOG00000032844(RT1-Da),ENSRNOG00000000451(RT1-Ba),ENSRNOG00000019728(Itgam),ENSRNOG00000046834(C3),ENSRNOG00000033215(RT1-Db1),	ENSRNOG00000001224(Itgb2),ENSRNOG00000032844(RT1-Da),ENSRNOG00000000451(RT1-Ba),ENSRNOG00000019728(Itgam),ENSRNOG00000046834(C3),ENSRNOG00000033215(RT1-Db1),	-	14.9629	8.31437e-07	3.20103e-05
rno04612	Antigen processing and presentation	6	6	0	41	76	7055	ENSRNOG00000018735(Cd74),ENSRNOG00000032844(RT1-Da),ENSRNOG00000000451(RT1-Ba),ENSRNOG00000029386(RT1-N2),ENSRNOG00000016294(Cd4),ENSRNOG00000033215(RT1-Db1),	ENSRNOG00000018735(Cd74),ENSRNOG00000032844(RT1-Da),ENSRNOG00000000451(RT1-Ba),ENSRNOG00000029386(RT1-N2),ENSRNOG00000016294(Cd4),ENSRNOG00000033215(RT1-Db1),	-	13.5847	1.56821e-06	1.72503e-05
rno00650	Butanoate metabolism	2	2	0	41	26	7055	ENSRNOG00000031211(Acsm5),ENSRNOG00000032246(Acsm3),	ENSRNOG00000031211(Acsm5),ENSRNOG00000032246(Acsm3),	-	13.2364	0.00117156	0.00429573
rno05323	Rheumatoid arthritis	5	5	0	41	84	7055	ENSRNOG00000001224(Itgb2),ENSRNOG00000032844(RT1-Da),ENSRNOG00000000451(RT1-Ba),ENSRNOG00000038835(Cd86),ENSRNOG00000033215(RT1-Db1),	ENSRNOG00000001224(Itgb2),ENSRNOG00000032844(RT1-Da),ENSRNOG00000000451(RT1-Ba),ENSRNOG00000038835(Cd86),ENSRNOG00000033215(RT1-Db1),	-	10.2425	3.76776e-05	0.000207227
rno00770	Pantothenate and CoA biosynthesis	1	0	1	41	17	7055	ENSRNOG00000013791(Enpp3),	-	ENSRNOG00000013791(Enpp3),	10.122	1	1
rno04514	Cell adhesion molecules (CAMs)	8	8	0	41	142	7055	ENSRNOG00000001224(Itgb2),ENSRNOG00000032844(RT1-Da),ENSRNOG00000000451(RT1-Ba),ENSRNOG00000029386(RT1-N2),ENSRNOG00000019728(Itgam),ENSRNOG00000038835(Cd86),ENSRNOG00000016294(Cd4),ENSRNOG00000033215(RT1-Db1),	ENSRNOG00000001224(Itgb2),ENSRNOG00000032844(RT1-Da),ENSRNOG00000000451(RT1-Ba),ENSRNOG00000029386(RT1-N2),ENSRNOG00000019728(Itgam),ENSRNOG00000038835(Cd86),ENSRNOG00000016294(Cd4),ENSRNOG00000033215(RT1-Db1),	-	9.69426	1.09227e-06	1.6821e-05
rno05340	Primary immunodeficiency	2	2	0	41	38	7055	ENSRNOG00000007664(Tnfrsf13c),ENSRNOG00000016294(Cd4),	ENSRNOG00000007664(Tnfrsf13c),ENSRNOG00000016294(Cd4),	-	9.05648	0.0034563	0.010236
rno05134	Legionellosis	3	3	0	41	57	7055	ENSRNOG00000001224(Itgb2),ENSRNOG00000019728(Itgam),ENSRNOG00000046834(C3),	ENSRNOG00000001224(Itgb2),ENSRNOG00000019728(Itgam),ENSRNOG00000046834(C3),	-	9.05648	0.000945863	0.00364157
rno04145	Phagosome	8	8	0	41	160	7055	ENSRNOG00000046452(Fcgr2b),ENSRNOG00000001224(Itgb2),ENSRNOG00000032844(RT1-Da),ENSRNOG00000000451(RT1-Ba),ENSRNOG00000029386(RT1-N2),ENSRNOG00000019728(Itgam),ENSRNOG00000046834(C3),ENSRNOG00000033215(RT1-Db1),	ENSRNOG00000046452(Fcgr2b),ENSRNOG00000001224(Itgb2),ENSRNOG00000032844(RT1-Da),ENSRNOG00000000451(RT1-Ba),ENSRNOG00000029386(RT1-N2),ENSRNOG00000019728(Itgam),ENSRNOG00000046834(C3),ENSRNOG00000033215(RT1-Db1),	-	8.60366	2.85392e-06	2.44169e-05
rno04610	Complement and coagulation cascades	4	3	1	41	80	7055	ENSRNOG00000001224(Itgb2),ENSRNOG00000001865(Serpind1),ENSRNOG00000019728(Itgam),ENSRNOG00000046834(C3),	ENSRNOG00000001224(Itgb2),ENSRNOG00000019728(Itgam),ENSRNOG00000046834(C3),	ENSRNOG00000001865(Serpind1),	8.60366	0.000331316	0.00159446
rno05322	Systemic lupus erythematosus	6	5	1	41	120	7055	ENSRNOG00000032844(RT1-Da),ENSRNOG00000058437(Hist1h2ac),ENSRNOG00000000451(RT1-Ba),ENSRNOG00000038835(Cd86),ENSRNOG00000046834(C3),ENSRNOG00000033215(RT1-Db1),	ENSRNOG00000032844(RT1-Da),ENSRNOG00000000451(RT1-Ba),ENSRNOG00000038835(Cd86),ENSRNOG00000046834(C3),ENSRNOG00000033215(RT1-Db1),	ENSRNOG00000058437(Hist1h2ac),	8.60366	2.9538e-05	0.000174956
rno04640	Hematopoietic cell lineage	4	4	0	41	81	7055	ENSRNOG00000032844(RT1-Da),ENSRNOG00000019728(Itgam),ENSRNOG00000016294(Cd4),ENSRNOG00000033215(RT1-Db1),	ENSRNOG00000032844(RT1-Da),ENSRNOG00000019728(Itgam),ENSRNOG00000016294(Cd4),ENSRNOG00000033215(RT1-Db1),	-	8.49744	0.000350639	0.00158819
rno05152	Tuberculosis	8	8	0	41	164	7055	ENSRNOG00000018735(Cd74),ENSRNOG00000046452(Fcgr2b),ENSRNOG00000001224(Itgb2),ENSRNOG00000032844(RT1-Da),ENSRNOG00000000451(RT1-Ba),ENSRNOG00000019728(Itgam),ENSRNOG00000046834(C3),ENSRNOG00000033215(RT1-Db1),	ENSRNOG00000018735(Cd74),ENSRNOG00000046452(Fcgr2b),ENSRNOG00000001224(Itgb2),ENSRNOG00000032844(RT1-Da),ENSRNOG00000000451(RT1-Ba),ENSRNOG00000019728(Itgam),ENSRNOG00000046834(C3),ENSRNOG00000033215(RT1-Db1),	-	8.39381	3.47543e-06	2.67608e-05
rno05321	Inflammatory bowel disease (IBD)	3	3	0	41	63	7055	ENSRNOG00000032844(RT1-Da),ENSRNOG00000000451(RT1-Ba),ENSRNOG00000033215(RT1-Db1),	ENSRNOG00000032844(RT1-Da),ENSRNOG00000000451(RT1-Ba),ENSRNOG00000033215(RT1-Db1),	-	8.19396	0.00136891	0.00479118
rno05133	Pertussis	3	3	0	41	68	7055	ENSRNOG00000001224(Itgb2),ENSRNOG00000019728(Itgam),ENSRNOG00000046834(C3),	ENSRNOG00000001224(Itgb2),ENSRNOG00000019728(Itgam),ENSRNOG00000046834(C3),	-	7.59146	0.00181122	0.00581101
rno04977	Vitamin digestion and absorption	1	0	1	41	23	7055	ENSRNOG00000025608(Lrat),	-	ENSRNOG00000025608(Lrat),	7.48144	1	1
rno05146	Amoebiasis	4	2	2	41	98	7055	ENSRNOG00000001224(Itgb2),ENSRNOG00000003357(Col3a1),ENSRNOG00000019728(Itgam),ENSRNOG00000003897(Col1a1),	ENSRNOG00000001224(Itgb2),ENSRNOG00000019728(Itgam),	ENSRNOG00000003357(Col3a1),ENSRNOG00000003897(Col1a1),	7.02339	0.000829113	0.00336009
rno05145	Toxoplasmosis	4	4	0	41	115	7055	ENSRNOG00000032844(RT1-Da),ENSRNOG00000043311(Birc7),ENSRNOG00000000451(RT1-Ba),ENSRNOG00000033215(RT1-Db1),	ENSRNOG00000032844(RT1-Da),ENSRNOG00000043311(Birc7),ENSRNOG00000000451(RT1-Ba),ENSRNOG00000033215(RT1-Db1),	-	5.98515	0.00168352	0.00563613
rno00760	Nicotinate and nicotinamide metabolism	1	0	1	41	31	7055	ENSRNOG00000013791(Enpp3),	-	ENSRNOG00000013791(Enpp3),	5.55075	1	1
rno04650	Natural killer cell mediated cytotoxicity	3	3	0	41	94	7055	ENSRNOG00000001224(Itgb2),ENSRNOG00000020845(Tyrobp),ENSRNOG00000004698(Cd244),	ENSRNOG00000001224(Itgb2),ENSRNOG00000020845(Tyrobp),ENSRNOG00000004698(Cd244),	-	5.4917	0.0057965	0.0165307
rno05168	Herpes simplex infection	6	6	0	41	191	7055	ENSRNOG00000018735(Cd74),ENSRNOG00000032844(RT1-Da),ENSRNOG00000000451(RT1-Ba),ENSRNOG00000029386(RT1-N2),ENSRNOG00000046834(C3),ENSRNOG00000033215(RT1-Db1),	ENSRNOG00000018735(Cd74),ENSRNOG00000032844(RT1-Da),ENSRNOG00000000451(RT1-Ba),ENSRNOG00000029386(RT1-N2),ENSRNOG00000046834(C3),ENSRNOG00000033215(RT1-Db1),	-	5.40544	0.000504022	0.00215609
rno04662	B cell receptor signaling pathway	2	1	1	41	70	7055	ENSRNOG00000046452(Fcgr2b),ENSRNOG00000004273(Ifitm1),	ENSRNOG00000046452(Fcgr2b),	ENSRNOG00000004273(Ifitm1),	4.91638	0.0186053	0.0477536
rno04670	Leukocyte transendothelial migration	3	2	1	41	113	7055	ENSRNOG00000001224(Itgb2),ENSRNOG00000019728(Itgam),ENSRNOG00000020246(Myl9),	ENSRNOG00000001224(Itgb2),ENSRNOG00000019728(Itgam),	ENSRNOG00000020246(Myl9),	4.56831	0.0110012	0.0302533
rno04974	Protein digestion and absorption	2	0	2	41	87	7055	ENSRNOG00000003357(Col3a1),ENSRNOG00000003897(Col1a1),	-	ENSRNOG00000003357(Col3a1),ENSRNOG00000003897(Col1a1),	3.95571	0.0330212	0.0794574
rno04380	Osteoclast differentiation	3	3	0	41	131	7055	ENSRNOG00000046452(Fcgr2b),ENSRNOG00000020845(Tyrobp),ENSRNOG00000046683(RGD1566307),	ENSRNOG00000046452(Fcgr2b),ENSRNOG00000020845(Tyrobp),ENSRNOG00000046683(RGD1566307),	-	3.94061	0.0181605	0.0482194
rno05166	HTLV-I infection	6	6	0	41	263	7055	ENSRNOG00000001224(Itgb2),ENSRNOG00000032844(RT1-Da),ENSRNOG00000000451(RT1-Ba),ENSRNOG00000007664(Tnfrsf13c),ENSRNOG00000029386(RT1-N2),ENSRNOG00000033215(RT1-Db1),	ENSRNOG00000001224(Itgb2),ENSRNOG00000032844(RT1-Da),ENSRNOG00000000451(RT1-Ba),ENSRNOG00000007664(Tnfrsf13c),ENSRNOG00000029386(RT1-N2),ENSRNOG00000033215(RT1-Db1),	-	3.92562	0.0031225	0.00961729
rno04530	Tight junction	3	1	2	41	132	7055	ENSRNOG00000020501(Tjp3),ENSRNOG00000049695(Myh1),ENSRNOG00000020246(Myl9),	ENSRNOG00000020501(Tjp3),	ENSRNOG00000049695(Myh1),ENSRNOG00000020246(Myl9),	3.91075	0.0186284	0.0462705
rno00500	Starch and sucrose metabolism	1	0	1	41	45	7055	ENSRNOG00000013791(Enpp3),	-	ENSRNOG00000013791(Enpp3),	3.82385	1	1
rno04933	AGE-RAGE signaling pathway in diabetic complications	2	0	2	41	102	7055	ENSRNOG00000003357(Col3a1),ENSRNOG00000003897(Col1a1),	-	ENSRNOG00000003357(Col3a1),ENSRNOG00000003897(Col1a1),	3.37398	0.0496779	0.112506
rno05164	Influenza A	3	3	0	41	161	7055	ENSRNOG00000032844(RT1-Da),ENSRNOG00000000451(RT1-Ba),ENSRNOG00000033215(RT1-Db1),	ENSRNOG00000032844(RT1-Da),ENSRNOG00000000451(RT1-Ba),ENSRNOG00000033215(RT1-Db1),	-	3.20633	0.0357088	0.0833205
rno05144	Malaria	1	1	0	41	54	7055	ENSRNOG00000001224(Itgb2),	ENSRNOG00000001224(Itgb2),	-	3.18654	1	1
rno04611	Platelet activation	2	0	2	41	116	7055	ENSRNOG00000003357(Col3a1),ENSRNOG00000003897(Col1a1),	-	ENSRNOG00000003357(Col3a1),ENSRNOG00000003897(Col1a1),	2.96678	0.0685555	0.150822
rno04918	Thyroid hormone synthesis	1	0	1	41	66	7055	ENSRNOG00000030726(Asgr2),	-	ENSRNOG00000030726(Asgr2),	2.60717	1	1
rno04810	Regulation of actin cytoskeleton	3	2	1	41	205	7055	ENSRNOG00000001224(Itgb2),ENSRNOG00000019728(Itgam),ENSRNOG00000020246(Myl9),	ENSRNOG00000001224(Itgb2),ENSRNOG00000019728(Itgam),	ENSRNOG00000020246(Myl9),	2.51814	0.0756952	0.161904
rno04512	ECM-receptor interaction	1	0	1	41	76	7055	ENSRNOG00000003897(Col1a1),	-	ENSRNOG00000003897(Col1a1),	2.26412	1	1
rno00830	Retinol metabolism	1	0	1	41	78	7055	ENSRNOG00000025608(Lrat),	-	ENSRNOG00000025608(Lrat),	2.20607	1	1
rno05202	Transcriptional misregulation in cancer	2	2	0	41	157	7055	ENSRNOG00000019728(Itgam),ENSRNOG00000038835(Cd86),	ENSRNOG00000019728(Itgam),ENSRNOG00000038835(Cd86),	-	2.19201	0.141355	0.294171
rno04022	cGMP-PKG signaling pathway	2	1	1	41	159	7055	ENSRNOG00000020400(Mef2b),ENSRNOG00000020246(Myl9),	ENSRNOG00000020400(Mef2b),	ENSRNOG00000020246(Myl9),	2.16444	0.145525	0.29488
rno05222	Small cell lung cancer	1	1	0	41	83	7055	ENSRNOG00000043311(Birc7),	ENSRNOG00000043311(Birc7),	-	2.07317	1	1
rno04666	Fc gamma R-mediated phagocytosis	1	1	0	41	84	7055	ENSRNOG00000046452(Fcgr2b),	ENSRNOG00000046452(Fcgr2b),	-	2.04849	1	1
rno04064	NF-kappa B signaling pathway	1	1	0	41	90	7055	ENSRNOG00000007664(Tnfrsf13c),	ENSRNOG00000007664(Tnfrsf13c),	-	1.91192	1	1
rno04024	cAMP signaling pathway	2	1	1	41	183	7055	ENSRNOG00000020246(Myl9),ENSRNOG00000015860(Gipr),	ENSRNOG00000015860(Gipr),	ENSRNOG00000020246(Myl9),	1.88058	0.199532	0.393948
rno04620	Toll-like receptor signaling pathway	1	1	0	41	94	7055	ENSRNOG00000038835(Cd86),	ENSRNOG00000038835(Cd86),	-	1.83057	1	1
rno05205	Proteoglycans in cancer	2	0	2	41	191	7055	ENSRNOG00000020369(Igf2),ENSRNOG00000004610(Lum),	-	ENSRNOG00000020369(Igf2),ENSRNOG00000004610(Lum),	1.80181	0.219037	0.421646
rno04510	Focal adhesion	2	0	2	41	195	7055	ENSRNOG00000020246(Myl9),ENSRNOG00000003897(Col1a1),	-	ENSRNOG00000020246(Myl9),ENSRNOG00000003897(Col1a1),	1.76485	0.229046	0.43016
rno04015	Rap1 signaling pathway	2	2	0	41	202	7055	ENSRNOG00000001224(Itgb2),ENSRNOG00000019728(Itgam),	ENSRNOG00000001224(Itgb2),ENSRNOG00000019728(Itgam),	-	1.70369	0.246952	0.452745
rno05142	Chagas disease (American trypanosomiasis)	1	1	0	41	103	7055	ENSRNOG00000046834(C3),	ENSRNOG00000046834(C3),	-	1.67061	1	1
rno05203	Viral carcinogenesis	2	2	0	41	211	7055	ENSRNOG00000029386(RT1-N2),ENSRNOG00000046834(C3),	ENSRNOG00000029386(RT1-N2),ENSRNOG00000046834(C3),	-	1.63103	0.27066	0.48467
rno04660	T cell receptor signaling pathway	1	1	0	41	107	7055	ENSRNOG00000016294(Cd4),	ENSRNOG00000016294(Cd4),	-	1.60816	1	1
rno04060	Cytokine-cytokine receptor interaction	2	1	1	41	215	7055	ENSRNOG00000028598(Edar),ENSRNOG00000007664(Tnfrsf13c),	ENSRNOG00000007664(Tnfrsf13c),	ENSRNOG00000028598(Edar),	1.60068	0.281429	0.492501
rno04270	Vascular smooth muscle contraction	1	0	1	41	110	7055	ENSRNOG00000020246(Myl9),	-	ENSRNOG00000020246(Myl9),	1.5643	1	1
rno04110	Cell cycle	1	0	1	41	121	7055	ENSRNOG00000059500(Cdkn1c),	-	ENSRNOG00000059500(Cdkn1c),	1.42209	1	1
rno05162	Measles	1	1	0	41	126	7055	ENSRNOG00000046452(Fcgr2b),	ENSRNOG00000046452(Fcgr2b),	-	1.36566	1	1
rno04120	Ubiquitin mediated proteolysis	1	1	0	41	128	7055	ENSRNOG00000043311(Birc7),	ENSRNOG00000043311(Birc7),	-	1.34432	1	1
rno04210	Apoptosis	1	1	0	41	130	7055	ENSRNOG00000003537(Spta1),	ENSRNOG00000003537(Spta1),	-	1.32364	1	1
rno04080	Neuroactive ligand-receptor interaction	2	2	0	41	272	7055	ENSRNOG00000009260(Cnr2),ENSRNOG00000015860(Gipr),	ENSRNOG00000009260(Cnr2),ENSRNOG00000015860(Gipr),	-	1.26524	0.446899	0.764693
rno04310	Wnt signaling pathway	1	0	1	41	137	7055	ENSRNOG00000011360(Dkk2),	-	ENSRNOG00000011360(Dkk2),	1.25601	1	1
rno05206	MicroRNAs in cancer	1	1	0	41	138	7055	ENSRNOG00000005903(St14),	ENSRNOG00000005903(St14),	-	1.24691	1	1
rno04390	Hippo signaling pathway	1	1	0	41	143	7055	ENSRNOG00000001224(Itgb2),	ENSRNOG00000001224(Itgb2),	-	1.20331	1	1
rno04921	Oxytocin signaling pathway	1	0	1	41	150	7055	ENSRNOG00000020246(Myl9),	-	ENSRNOG00000020246(Myl9),	1.14715	1	1
rno05034	Alcoholism	1	0	1	41	162	7055	ENSRNOG00000058437(Hist1h2ac),	-	ENSRNOG00000058437(Hist1h2ac),	1.06218	1	1
rno00230	Purine metabolism	1	0	1	41	169	7055	ENSRNOG00000013791(Enpp3),	-	ENSRNOG00000013791(Enpp3),	1.01818	1	1
rno05169	Epstein-Barr virus infection	1	1	0	41	200	7055	ENSRNOG00000029386(RT1-N2),	ENSRNOG00000029386(RT1-N2),	-	0.860366	1	1
rno04010	MAPK signaling pathway	1	1	0	41	249	7055	ENSRNOG00000005807(Ptpn7),	ENSRNOG00000005807(Ptpn7),	-	0.691057	1	1
rno04144	Endocytosis	1	1	0	41	256	7055	ENSRNOG00000029386(RT1-N2),	ENSRNOG00000029386(RT1-N2),	-	0.672161	1	1
rno01100	Metabolic pathways	4	2	2	41	1223	7055	ENSRNOG00000031211(Acsm5),ENSRNOG00000022273(RGD1563242),ENSRNOG00000013791(Enpp3),ENSRNOG00000032246(Acsm3),	ENSRNOG00000031211(Acsm5),ENSRNOG00000032246(Acsm3),	ENSRNOG00000022273(RGD1563242),ENSRNOG00000013791(Enpp3),	0.56279	1	1
rno04151	PI3K-Akt signaling pathway	1	0	1	41	315	7055	ENSRNOG00000003897(Col1a1),	-	ENSRNOG00000003897(Col1a1),	0.546264	1	1
rno05200	Pathways in cancer	1	1	0	41	380	7055	ENSRNOG00000043311(Birc7),	ENSRNOG00000043311(Birc7),	-	0.452824	1	1
