# Supplementary material for: LncRNAs down-regulate Myh1, Casr, and Mis18a expression in the Substantia Nigra of aged male rats
Source: Aging (Albany NY). 2019 Oct 2;11(19):8313–28. doi: 10.18632/aging.102321 (PMC6814601; doi:10.18632/aging.102321)
Supplement: Supplementary Table 10 [file aging-11-102321-s019.xlsx]

## Sheet: Table 10
lncRNA_id	locus	length	1_FPKM	2_FPKM	3_FPKM	4_FPKM	5_FPKM	6_FPKM	6Mon	24Mon	log2FC	Pvalue	Qvalue	updown	type	gene_id	gene name	description	locus	1_FPKM	2_FPKM	3_FPKM	4_FPKM	5_FPKM	6_FPKM	6Mon	24Mon	log2FC	Pvalue	Qvalue	updown
MSTRG.25393.1	7:134476017-134478228	1807	0	0	0	5.52965	3.06125	0	0	2.86363	Inf	3.15686e-07	0.000171579	UP	cis	ENSRNOG00000005234	Gxylt1	glucoside xylosyltransferase 1 [Source:RGD Symbol;Acc:1563062]	7:134447578-134495835	12.9847	7.33831	13.4148	13.2093	12.7222	12.5137	11.2459	12.8151	0.188436	0.243847	0.866079	-
NONRATT006714.2	11:83975348-83975683	336	8.31728	0.214147	9.25167	0.215388	0.506556	0.22154	5.9277	0.314495	-4.23637	3.06271e-05	0.00852126	DOWN	cis	ENSRNOG00000038184	Camk2n2	calcium/calmodulin-dependent protein kinase II inhibitor 2 [Source:RGD Symbol;Acc:708411]	11:83975367-83976588	21.3167	26.0359	25.1666	22.5434	21.2858	21.3908	24.173	21.74	-0.153049	0.334183	0.918399	-
NONRATT016848.2	2:227718789-227719555	358	12.9467	10.4532	7.38982	1.01117	4.04113	2.91054	10.2632	2.65428	-1.95109	0.000172693	0.0310667	DOWN	cis	ENSRNOG00000053898	SNORA24	Small nucleolar RNA SNORA24 [Source:RFAM;Acc:RF00399]	2:227719170-227719299	2.41068	3.17686	2.33885	3.85564	0.75215	1.97919	2.64213	2.19566	-0.267049	0.842093	1	-
NONRATT024385.2	6:95314977-95338931	1165	0.351062	6.60971	5.73396	0.186424	0	0.0638947	4.23158	0.0834396	-5.66432	7.9504e-08	5.63057e-05	DOWN	cis	ENSRNOG00000005568	Pcnxl4	pecanex-like 4 (Drosophila) [Source:RGD Symbol;Acc:1582892]	6:95323579-95360127	20.9438	21.1911	23.3284	20.3155	21.275	22.7077	21.8211	21.4327	-0.0259085	0.795872	1	-
NONRATT010755.2	15:11832611-11833911	1199	0	0	0	6.09929	0	0	0	2.0331	Inf	0.000309023	0.0451387	UP	cis	ENSRNOG00000005957	Slc4a7	solute carrier family 4, sodium bicarbonate cotransporter, member 7 [Source:RGD Symbol;Acc:621208]	15:11836286-11912916	5.93955	6.44815	6.78664	6.84011	6.07571	7.15609	6.39144	6.69064	0.0660014	0.52399	0.985627	-
MSTRG.24823.1	7:93128932-93141631	12388	8.52831	8.15041	0	0	0	0	5.55957	0	#NAME?	2.8177e-08	3.13583e-05	DOWN	cis	ENSRNOG00000061079	SNORA17	Small nucleolar RNA SNORA17 [Source:RFAM;Acc:RF00560]	7:93146477-93146598	12.8425	14.8953	11.839	13.6958	12.0221	14.0589	13.1923	13.2589	0.00726885	1	1	-
NONRATT006242.2	10:102244680-102245116	437	0.779914	13.8332	8.62681	0.165608	0.19474	0.170337	7.74664	0.176895	-5.45261	6.50641e-08	5.06871e-05	DOWN	cis	ENSRNOG00000028946	Cdc42ep4	CDC42 effector protein (Rho GTPase binding) 4 [Source:RGD Symbol;Acc:1311567]	10:102244681-102269272	17.2179	19.0016	18.2119	15.5573	16.0666	19.6061	18.1438	17.0766	-0.0874534	0.427482	0.974534	-
NONRATT030073.2	9:66454056-66483409	740	1.84219	1.65328	0	0	0	0	1.16516	0	#NAME?	4.60798e-05	0.0118344	DOWN	cis	ENSRNOG00000016133	Sumo1	small ubiquitin-like modifier 1 [Source:RGD Symbol;Acc:1306919]	9:66453438-66483614	91.9568	80.6047	82.8287	82.4949	83.7626	87.4481	85.13	84.5686	-0.0095471	0.941919	1	-
NONRATT000490.2	1:82230930-82234051	3122	0.0655008	0.0691418	0.0635532	0.0695657	29.1945	20.5018	0.0660653	16.5886	7.97209	4.55986e-08	4.09878e-05	UP	trans	ENSRNOG00000045524	Slc39a3	solute carrier family 39 (zinc transporter), member 3 [Source:RGD Symbol;Acc:1310863]	7:11545024-11553370	7.86347	6.2632	7.71249	7.98009	7.51963	6.78008	7.27972	7.4266	0.028819	0.805159	1	-
NONRATT000490.2	1:82230930-82234051	3122	0.0655008	0.0691418	0.0635532	0.0695657	29.1945	20.5018	0.0660653	16.5886	7.97209	4.55986e-08	4.09878e-05	UP	trans	ENSRNOG00000042201	Efcab2	EF-hand calcium binding domain 2 [Source:RGD Symbol;Acc:1308593]	13:96303703-96414404	1.98926	1.77293	1.83839	1.7931	1.53707	2.43689	1.86686	1.92235	0.0422613	0.826364	1	-
NONRATT000490.2	1:82230930-82234051	3122	0.0655008	0.0691418	0.0635532	0.0695657	29.1945	20.5018	0.0660653	16.5886	7.97209	4.55986e-08	4.09878e-05	UP	trans	ENSRNOG00000008065	Wwc1	WW and C2 domain containing 1 [Source:RGD Symbol;Acc:1308329]	10:20663541-20818128	23.1247	23.2384	23.1626	20.3237	22.2726	22.1445	23.1753	21.5803	-0.102871	0.203976	0.820385	-
NONRATT000490.2	1:82230930-82234051	3122	0.0655008	0.0691418	0.0635532	0.0695657	29.1945	20.5018	0.0660653	16.5886	7.97209	4.55986e-08	4.09878e-05	UP	trans	ENSRNOG00000007262	Ccdc134	coiled-coil domain containing 134 [Source:RGD Symbol;Acc:1559657]	7:123364312-123376221	3.75217	4.38412	5.31381	6.16431	5.25301	6.27224	4.48337	5.89652	0.395281	0.0273277	0.358853	-
NONRATT000490.2	1:82230930-82234051	3122	0.0655008	0.0691418	0.0635532	0.0695657	29.1945	20.5018	0.0660653	16.5886	7.97209	4.55986e-08	4.09878e-05	UP	trans	ENSRNOG00000009826	Bche	butyrylcholinesterase [Source:RGD Symbol;Acc:619996]	2:171100140-171196395	4.68349	4.21825	4.23699	3.2387	3.53189	4.0856	4.37957	3.61873	-0.275307	0.0236701	0.33293	-
NONRATT000490.2	1:82230930-82234051	3122	0.0655008	0.0691418	0.0635532	0.0695657	29.1945	20.5018	0.0660653	16.5886	7.97209	4.55986e-08	4.09878e-05	UP	trans	ENSRNOG00000033101	Myo18a	myosin XVIIIa [Source:RGD Symbol;Acc:1562698]	10:64979770-65080535	27.8319	29.5368	27.4762	31.8037	32.444	31.7232	28.2816	31.9903	0.17777	0.00721786	0.169727	-
NONRATT000490.2	1:82230930-82234051	3122	0.0655008	0.0691418	0.0635532	0.0695657	29.1945	20.5018	0.0660653	16.5886	7.97209	4.55986e-08	4.09878e-05	UP	trans	ENSRNOG00000015787	P3h4	prolyl 3-hydroxylase family member 4 [Source:RGD Symbol;Acc:620767]	10:88318817-88325326	6.56879	4.2007	5.01667	3.92419	5.2383	3.96162	5.26205	4.3747	-0.26644	0.160948	0.757474	-
NONRATT000490.2	1:82230930-82234051	3122	0.0655008	0.0691418	0.0635532	0.0695657	29.1945	20.5018	0.0660653	16.5886	7.97209	4.55986e-08	4.09878e-05	UP	trans	ENSRNOG00000037919	Chic1	cysteine-rich hydrophobic domain 1 [Source:RGD Symbol;Acc:1589722]	X:74200972-74244846	7.26577	7.33525	8.58804	6.59441	7.33241	7.02308	7.72968	6.9833	-0.146501	0.286849	0.890804	-
NONRATT000490.2	1:82230930-82234051	3122	0.0655008	0.0691418	0.0635532	0.0695657	29.1945	20.5018	0.0660653	16.5886	7.97209	4.55986e-08	4.09878e-05	UP	trans	ENSRNOG00000006925	Zfp786	zinc finger protein 786 [Source:RGD Symbol;Acc:2293500]	4:77495663-77510202	1.93225	2.03743	2.19642	1.92323	1.72273	2.07494	2.05536	1.90697	-0.108114	0.556859	0.996692	-
NONRATT000490.2	1:82230930-82234051	3122	0.0655008	0.0691418	0.0635532	0.0695657	29.1945	20.5018	0.0660653	16.5886	7.97209	4.55986e-08	4.09878e-05	UP	trans	ENSRNOG00000020482	Nfatc4	nuclear factor of activated T-cells, cytoplasmic, calcineurin-dependent 4 [Source:RGD Symbol;Acc:1310749]	15:34493138-34504326	0.766756	1.01346	0.89074	0.852241	0.539189	0.449238	0.890319	0.613556	-0.537126	0.030314	0.372948	-
NONRATT000490.2	1:82230930-82234051	3122	0.0655008	0.0691418	0.0635532	0.0695657	29.1945	20.5018	0.0660653	16.5886	7.97209	4.55986e-08	4.09878e-05	UP	trans	ENSRNOG00000006131	Mettl2b	methyltransferase like 2B [Source:RGD Symbol;Acc:1310240]	10:93354003-93379470	2.17677	2.05508	2.70173	2.53733	2.875	2.05042	2.3112	2.48759	0.106107	0.587519	1	-
NONRATT000490.2	1:82230930-82234051	3122	0.0655008	0.0691418	0.0635532	0.0695657	29.1945	20.5018	0.0660653	16.5886	7.97209	4.55986e-08	4.09878e-05	UP	trans	ENSRNOG00000019318	Syt3	synaptotagmin III [Source:RGD Symbol;Acc:3805]	1:100379186-100408083	13.3424	13.0102	12.3625	12.3991	15.3097	13.6469	12.905	13.7852	0.0951874	0.307438	0.900043	-
NONRATT000490.2	1:82230930-82234051	3122	0.0655008	0.0691418	0.0635532	0.0695657	29.1945	20.5018	0.0660653	16.5886	7.97209	4.55986e-08	4.09878e-05	UP	trans	ENSRNOG00000006965	Aff4	AF4/FMR2 family, member 4 [Source:RGD Symbol;Acc:1311694]	10:38692211-38773021	41.9815	42.3008	42.3821	44.0802	42.1591	41.6643	42.2215	42.6346	0.0140467	0.787553	1	-
NONRATT000490.2	1:82230930-82234051	3122	0.0655008	0.0691418	0.0635532	0.0695657	29.1945	20.5018	0.0660653	16.5886	7.97209	4.55986e-08	4.09878e-05	UP	trans	ENSRNOG00000010985	Zfp410	zinc finger protein 410 [Source:RGD Symbol;Acc:1305636]	6:108032856-108058809	12.4581	13.5123	12.9194	12.9054	12.9683	13.0393	12.9633	12.971	0.000859251	0.968025	1	-
NONRATT000490.2	1:82230930-82234051	3122	0.0655008	0.0691418	0.0635532	0.0695657	29.1945	20.5018	0.0660653	16.5886	7.97209	4.55986e-08	4.09878e-05	UP	trans	ENSRNOG00000058940	Rab11fip1	RAB11 family interacting protein 1 (class I) [Source:RGD Symbol;Acc:1562965]	16:69048739-69079332	0.848469	0.484165	0.63929	1.12838	0.859695	0.830473	0.657308	0.939516	0.515347	0.0240478	0.335628	-
NONRATT000490.2	1:82230930-82234051	3122	0.0655008	0.0691418	0.0635532	0.0695657	29.1945	20.5018	0.0660653	16.5886	7.97209	4.55986e-08	4.09878e-05	UP	trans	ENSRNOG00000059322	N4bp2l1	NEDD4 binding protein 2-like 1 [Source:RGD Symbol;Acc:1595713]	12:546760-576746	6.48219	5.94181	6.64749	5.38101	7.53932	5.56394	6.35716	6.16143	-0.0451194	0.786778	1	-
NONRATT000490.2	1:82230930-82234051	3122	0.0655008	0.0691418	0.0635532	0.0695657	29.1945	20.5018	0.0660653	16.5886	7.97209	4.55986e-08	4.09878e-05	UP	trans	ENSRNOG00000013166	Wnt4	wingless-type MMTV integration site family, member 4 [Source:RGD Symbol;Acc:621348]	5:155649217-155672579	3.40654	2.53916	2.4279	1.52831	2.00871	1.05445	2.7912	1.53049	-0.866893	2.80887e-05	0.0034502	-
NONRATT000490.2	1:82230930-82234051	3122	0.0655008	0.0691418	0.0635532	0.0695657	29.1945	20.5018	0.0660653	16.5886	7.97209	4.55986e-08	4.09878e-05	UP	trans	ENSRNOG00000017157	Trim69	tripartite motif-containing 69 [Source:RGD Symbol;Acc:1305074]	3:114102875-114126523	0.346003	0.381422	0.320494	0.553485	0.530043	0.327121	0.349307	0.470216	0.428831	0.152352	0.742889	-
NONRATT000490.2	1:82230930-82234051	3122	0.0655008	0.0691418	0.0635532	0.0695657	29.1945	20.5018	0.0660653	16.5886	7.97209	4.55986e-08	4.09878e-05	UP	trans	ENSRNOG00000001285	Atp2a2	ATPase, Ca++ transporting, cardiac muscle, slow twitch 2 [Source:RGD Symbol;Acc:2174]	12:39553903-39603326	196.217	201.939	208.236	207.592	214.783	214.062	202.131	212.146	0.0697668	0.237541	0.86089	-
NONRATT000490.2	1:82230930-82234051	3122	0.0655008	0.0691418	0.0635532	0.0695657	29.1945	20.5018	0.0660653	16.5886	7.97209	4.55986e-08	4.09878e-05	UP	trans	ENSRNOG00000021200	Hfe2	hemochromatosis type 2 (juvenile) [Source:RGD Symbol;Acc:1310195]	2:198655437-198659317	0	0.0390139	0	0	0	0.0809731	0.0130046	0.026991	1.05345	1	1	-
NONRATT000490.2	1:82230930-82234051	3122	0.0655008	0.0691418	0.0635532	0.0695657	29.1945	20.5018	0.0660653	16.5886	7.97209	4.55986e-08	4.09878e-05	UP	trans	ENSRNOG00000027434	Fitm2	fat storage-inducing transmembrane protein 2 [Source:RGD Symbol;Acc:1307696]	3:159856994-159863506	8.33577	9.38167	9.96192	9.37611	10.1856	9.18283	9.22645	9.5815	0.0544758	0.564283	0.997609	-
NONRATT000490.2	1:82230930-82234051	3122	0.0655008	0.0691418	0.0635532	0.0695657	29.1945	20.5018	0.0660653	16.5886	7.97209	4.55986e-08	4.09878e-05	UP	trans	ENSRNOG00000020751	Rdm1	RAD52 motif containing 1 [Source:RGD Symbol;Acc:1310432]	10:89539556-89550500	3.24868	2.47157	2.43414	3.46453	2.6691	2.83609	2.71813	2.98991	0.137484	0.514907	0.985627	-
NONRATT000490.2	1:82230930-82234051	3122	0.0655008	0.0691418	0.0635532	0.0695657	29.1945	20.5018	0.0660653	16.5886	7.97209	4.55986e-08	4.09878e-05	UP	trans	ENSRNOG00000012264	Alkbh1	alkB, alkylation repair homolog 1 (E. coli) [Source:RGD Symbol;Acc:1308327]	6:111456187-111477090	7.18406	6.83168	6.43492	6.56395	7.11182	7.13429	6.81689	6.93668	0.0251333	0.798863	1	-
NONRATT000490.2	1:82230930-82234051	3122	0.0655008	0.0691418	0.0635532	0.0695657	29.1945	20.5018	0.0660653	16.5886	7.97209	4.55986e-08	4.09878e-05	UP	trans	ENSRNOG00000025406	Iqgap2	IQ motif containing GTPase activating protein 2 [Source:RGD Symbol;Acc:2321734]	2:26167199-26438790	0.775844	1.10551	0.946146	1.16281	0.588889	0.768971	0.942499	0.840222	-0.165719	0.534456	0.986465	-
NONRATT000490.2	1:82230930-82234051	3122	0.0655008	0.0691418	0.0635532	0.0695657	29.1945	20.5018	0.0660653	16.5886	7.97209	4.55986e-08	4.09878e-05	UP	trans	ENSRNOG00000009783	Camk2g	calcium/calmodulin-dependent protein kinase II gamma [Source:RGD Symbol;Acc:621802]	15:3936786-3995915	0.779838	0.797375	0.745263	0.630036	0.840653	0.827822	0.774159	0.766171	-0.0149642	0.968218	1	-
NONRATT000490.2	1:82230930-82234051	3122	0.0655008	0.0691418	0.0635532	0.0695657	29.1945	20.5018	0.0660653	16.5886	7.97209	4.55986e-08	4.09878e-05	UP	trans	ENSRNOG00000030118	Msn	moesin [Source:RGD Symbol;Acc:621260]	X:65226748-65295810	11.4025	12.4459	13.5055	15.4911	13.2664	12.0436	12.4513	13.6004	0.12735	0.198094	0.8131	-
NONRATT000490.2	1:82230930-82234051	3122	0.0655008	0.0691418	0.0635532	0.0695657	29.1945	20.5018	0.0660653	16.5886	7.97209	4.55986e-08	4.09878e-05	UP	trans	ENSRNOG00000031916	Timeless	timeless circadian clock [Source:RGD Symbol;Acc:620939]	7:2643288-2667628	1.21822	0.921842	1.29338	1.13102	1.30589	0.878605	1.14448	1.10517	-0.0504203	0.826192	1	-
NONRATT000490.2	1:82230930-82234051	3122	0.0655008	0.0691418	0.0635532	0.0695657	29.1945	20.5018	0.0660653	16.5886	7.97209	4.55986e-08	4.09878e-05	UP	trans	ENSRNOG00000001811	Fgfr1op2	FGFR1 oncogene partner 2 [Source:RGD Symbol;Acc:1303233]	4:180887182-180908198	10.2824	11.1537	10.672	10.5839	9.74708	11.1028	10.7027	10.4779	-0.030618	0.769729	1	-
NONRATT000490.2	1:82230930-82234051	3122	0.0655008	0.0691418	0.0635532	0.0695657	29.1945	20.5018	0.0660653	16.5886	7.97209	4.55986e-08	4.09878e-05	UP	trans	ENSRNOG00000054724	Pycrl	pyrroline-5-carboxylate reductase-like [Source:RGD Symbol;Acc:1309115]	7:116949879-116955148	8.86453	11.3178	7.56542	7.97272	10.0648	8.30102	9.24925	8.7795	-0.0751981	0.695575	1	-
NONRATT000490.2	1:82230930-82234051	3122	0.0655008	0.0691418	0.0635532	0.0695657	29.1945	20.5018	0.0660653	16.5886	7.97209	4.55986e-08	4.09878e-05	UP	trans	ENSRNOG00000000956	Rasl11a	RAS-like family 11 member A [Source:RGD Symbol;Acc:1303231]	12:9985928-9990284	0.656831	0.92345	1.1048	1.26086	1.03846	0.766961	0.895026	1.02209	0.191527	0.553052	0.996223	-
NONRATT000490.2	1:82230930-82234051	3122	0.0655008	0.0691418	0.0635532	0.0695657	29.1945	20.5018	0.0660653	16.5886	7.97209	4.55986e-08	4.09878e-05	UP	trans	ENSRNOG00000027979	LOC500354	similar to C030030A07Rik protein [Source:RGD Symbol;Acc:1563896]	4:170820594-170821995	0.0558685	0.0589383	0	0	0	0.305845	0.0382689	0.101948	1.41359	0.540759	0.989456	-
NONRATT000490.2	1:82230930-82234051	3122	0.0655008	0.0691418	0.0635532	0.0695657	29.1945	20.5018	0.0660653	16.5886	7.97209	4.55986e-08	4.09878e-05	UP	trans	ENSRNOG00000000457	Tap1	transporter 1, ATP-binding cassette, sub-family B (MDR/TAP) [Source:RGD Symbol;Acc:3817]	20:3979035-3989669	0.945901	1.09549	1.15862	1.12449	0.948396	1.05245	1.06667	1.04178	-0.0340644	0.905388	1	-
NONRATT000490.2	1:82230930-82234051	3122	0.0655008	0.0691418	0.0635532	0.0695657	29.1945	20.5018	0.0660653	16.5886	7.97209	4.55986e-08	4.09878e-05	UP	trans	ENSRNOG00000026061	RGD1566226	similar to hypothetical protein F830045P16 [Source:RGD Symbol;Acc:1566226]	3:121977350-122057632	0	0.0513461	0.141771	0.0259723	0.0607893	0.13329	0.0643723	0.0733507	0.18837	1	1	-
NONRATT000490.2	1:82230930-82234051	3122	0.0655008	0.0691418	0.0635532	0.0695657	29.1945	20.5018	0.0660653	16.5886	7.97209	4.55986e-08	4.09878e-05	UP	trans	ENSRNOG00000018326	Pgls	6-phosphogluconolactonase [Source:RGD Symbol;Acc:1307001]	16:20020444-20025930	2.50579	2.88553	2.91144	2.46129	2.26346	2.99573	2.76759	2.57349	-0.104901	0.632372	1	-
NONRATT000490.2	1:82230930-82234051	3122	0.0655008	0.0691418	0.0635532	0.0695657	29.1945	20.5018	0.0660653	16.5886	7.97209	4.55986e-08	4.09878e-05	UP	trans	ENSRNOG00000024450	Poc1b	POC1 centriolar protein B [Source:RGD Symbol;Acc:2323942]	7:41304440-41404370	3.84877	3.72011	3.31974	3.53439	3.66972	3.33549	3.62954	3.5132	-0.0470009	0.775396	1	-
NONRATT000490.2	1:82230930-82234051	3122	0.0655008	0.0691418	0.0635532	0.0695657	29.1945	20.5018	0.0660653	16.5886	7.97209	4.55986e-08	4.09878e-05	UP	trans	ENSRNOG00000002866	Rassf6	Ras association (RalGDS/AF-6) domain family member 6 [Source:RGD Symbol;Acc:1566082]	14:18983853-19025971	0.993499	0.853581	0.946205	1.25569	1.33192	0.866033	0.931095	1.15121	0.306155	0.187405	0.80017	-
NONRATT000490.2	1:82230930-82234051	3122	0.0655008	0.0691418	0.0635532	0.0695657	29.1945	20.5018	0.0660653	16.5886	7.97209	4.55986e-08	4.09878e-05	UP	trans	ENSRNOG00000007203	Psmc6	proteasome (prosome, macropain) 26S subunit, ATPase, 6 [Source:RGD Symbol;Acc:1308825]	15:19667453-19688914	42.7093	36.2148	38.0885	37.6804	37.0739	35.7233	39.0042	36.8259	-0.0829089	0.341623	0.927539	-
NONRATT000490.2	1:82230930-82234051	3122	0.0655008	0.0691418	0.0635532	0.0695657	29.1945	20.5018	0.0660653	16.5886	7.97209	4.55986e-08	4.09878e-05	UP	trans	ENSRNOG00000059801	Lima1	LIM domain and actin binding 1 [Source:RGD Symbol;Acc:1564050]	7:141428063-141528397	5.61361	6.81087	6.98366	6.65811	5.74921	6.95279	6.46938	6.45337	-0.00357508	1	1	-
NONRATT000490.2	1:82230930-82234051	3122	0.0655008	0.0691418	0.0635532	0.0695657	29.1945	20.5018	0.0660653	16.5886	7.97209	4.55986e-08	4.09878e-05	UP	trans	ENSRNOG00000024128	Aco2	aconitase 2, mitochondrial [Source:RGD Symbol;Acc:621360]	7:123102468-123145635	85.9296	85.3972	86.1453	90.4904	87.6567	86.809	85.824	88.3187	0.0413374	0.469104	0.985627	-
NONRATT000490.2	1:82230930-82234051	3122	0.0655008	0.0691418	0.0635532	0.0695657	29.1945	20.5018	0.0660653	16.5886	7.97209	4.55986e-08	4.09878e-05	UP	trans	ENSRNOG00000005153	LOC690422	hypothetical protein LOC690422 [Source:RGD Symbol;Acc:1596085]	6:137967401-137980217	2.08958	2.53894	2.32308	2.25792	3.10912	3.07521	2.3172	2.81408	0.280283	0.0731977	0.564246	-
NONRATT000490.2	1:82230930-82234051	3122	0.0655008	0.0691418	0.0635532	0.0695657	29.1945	20.5018	0.0660653	16.5886	7.97209	4.55986e-08	4.09878e-05	UP	trans	ENSRNOG00000019208	P2rx5	purinergic receptor P2X, ligand-gated ion channel, 5 [Source:RGD Symbol;Acc:620256]	10:59725619-59740865	1.04952	1.10666	1.04357	1.06398	1.43939	1.07799	1.06658	1.19379	0.162555	0.405814	0.963023	-
NONRATT000490.2	1:82230930-82234051	3122	0.0655008	0.0691418	0.0635532	0.0695657	29.1945	20.5018	0.0660653	16.5886	7.97209	4.55986e-08	4.09878e-05	UP	trans	ENSRNOG00000006658	RGD1563015	RGD1563015 [Source:RGD Symbol;Acc:1563015]	5:138254946-138267601	0	0	0.0895321	0.0492066	0	0.101002	0.029844	0.0500695	0.746489	1	1	-
NONRATT000490.2	1:82230930-82234051	3122	0.0655008	0.0691418	0.0635532	0.0695657	29.1945	20.5018	0.0660653	16.5886	7.97209	4.55986e-08	4.09878e-05	UP	trans	ENSRNOG00000054385	Rhebl1	GTPase RhebL1 [Source:UniProtKB/Swiss-Prot;Acc:Q7TNZ5]	7:140552733-140556639	2.98241	2.02664	1.86505	1.41361	1.15813	1.95895	2.29137	1.51023	-0.601438	0.0625568	0.527503	-
NONRATT000490.2	1:82230930-82234051	3122	0.0655008	0.0691418	0.0635532	0.0695657	29.1945	20.5018	0.0660653	16.5886	7.97209	4.55986e-08	4.09878e-05	UP	trans	ENSRNOG00000000934	Piwil1	piwi-like RNA-mediated gene silencing 1 [Source:RGD Symbol;Acc:1306980]	12:31609053-31629881	0.0586724	0.0206321	0.0379589	0.0417243	0	0.0214215	0.0390878	0.0210486	-0.892994	0.519743	0.985627	-
NONRATT000490.2	1:82230930-82234051	3122	0.0655008	0.0691418	0.0635532	0.0695657	29.1945	20.5018	0.0660653	16.5886	7.97209	4.55986e-08	4.09878e-05	UP	trans	ENSRNOG00000043204	Harbi1	harbinger transposase derived 1 [Source:RGD Symbol;Acc:1584007]	3:80614937-80624205	6.8951	7.50936	7.79018	6.69724	6.06084	7.15829	7.39821	6.63879	-0.156256	0.235197	0.859098	-
NONRATT000490.2	1:82230930-82234051	3122	0.0655008	0.0691418	0.0635532	0.0695657	29.1945	20.5018	0.0660653	16.5886	7.97209	4.55986e-08	4.09878e-05	UP	trans	ENSRNOG00000018714	Arl5b	ADP-ribosylation factor-like 5B [Source:RGD Symbol;Acc:1305569]	17:82065937-82091362	7.81775	7.87212	7.45796	8.13374	6.60908	6.90429	7.71594	7.2157	-0.0967022	0.364282	0.94801	-
NONRATT000490.2	1:82230930-82234051	3122	0.0655008	0.0691418	0.0635532	0.0695657	29.1945	20.5018	0.0660653	16.5886	7.97209	4.55986e-08	4.09878e-05	UP	trans	ENSRNOG00000007023	Galm	galactose mutarotase (aldose 1-epimerase) [Source:RGD Symbol;Acc:1359459]	6:2808841-2860744	4.02866	5.81863	3.84356	5.77652	6.04268	5.67022	4.56361	5.82981	0.353272	0.0398192	0.421104	-
NONRATT000490.2	1:82230930-82234051	3122	0.0655008	0.0691418	0.0635532	0.0695657	29.1945	20.5018	0.0660653	16.5886	7.97209	4.55986e-08	4.09878e-05	UP	trans	ENSRNOG00000008619	Agtrap	angiotensin II receptor-associated protein [Source:RGD Symbol;Acc:1359346]	5:164886813-164898420	11.1137	11.0742	10.7404	13.1313	12.4028	9.86175	10.9761	11.7986	0.104254	0.338175	0.923339	-
NONRATT000490.2	1:82230930-82234051	3122	0.0655008	0.0691418	0.0635532	0.0695657	29.1945	20.5018	0.0660653	16.5886	7.97209	4.55986e-08	4.09878e-05	UP	trans	ENSRNOG00000057141	AABR07035641.1	-	12:20592216-20660304	0	0	0	0	0.0567167	0	0	0.0189056	Inf	0.297357	0.891638	-
NONRATT000490.2	1:82230930-82234051	3122	0.0655008	0.0691418	0.0635532	0.0695657	29.1945	20.5018	0.0660653	16.5886	7.97209	4.55986e-08	4.09878e-05	UP	trans	ENSRNOG00000049019	Tmem170a	transmembrane protein 170A [Source:RGD Symbol;Acc:1559505]	19:44088612-44101365	2.28755	1.96069	1.9212	2.79618	2.0538	2.70922	2.05648	2.51973	0.293092	0.0582882	0.506017	-
NONRATT000490.2	1:82230930-82234051	3122	0.0655008	0.0691418	0.0635532	0.0695657	29.1945	20.5018	0.0660653	16.5886	7.97209	4.55986e-08	4.09878e-05	UP	trans	ENSRNOG00000011573	Csad	cysteine sulfinic acid decarboxylase [Source:RGD Symbol;Acc:621030]	7:143781702-143793970	8.13267	7.06851	7.16048	10.1692	9.40519	7.19623	7.45389	8.92355	0.259625	0.0563327	0.498673	-
NONRATT000490.2	1:82230930-82234051	3122	0.0655008	0.0691418	0.0635532	0.0695657	29.1945	20.5018	0.0660653	16.5886	7.97209	4.55986e-08	4.09878e-05	UP	trans	ENSRNOG00000010169	Atpaf1	ATP synthase mitochondrial F1 complex assembly factor 1 [Source:RGD Symbol;Acc:1305417]	5:134641608-134667084	20.4177	19.9905	20.5596	24.0164	22.9897	22.4394	20.3226	23.1485	0.187833	0.00548453	0.14759	-
NONRATT000490.2	1:82230930-82234051	3122	0.0655008	0.0691418	0.0635532	0.0695657	29.1945	20.5018	0.0660653	16.5886	7.97209	4.55986e-08	4.09878e-05	UP	trans	ENSRNOG00000042029	Efs	embryonal Fyn-associated substrate [Source:RGD Symbol;Acc:1308966]	15:33578381-33589522	4.14809	4.00781	3.98969	3.66366	3.46694	3.78077	4.04853	3.63712	-0.154601	0.214626	0.833551	-
NONRATT000490.2	1:82230930-82234051	3122	0.0655008	0.0691418	0.0635532	0.0695657	29.1945	20.5018	0.0660653	16.5886	7.97209	4.55986e-08	4.09878e-05	UP	trans	ENSRNOG00000012436	Adh6	alcohol dehydrogenase 6 (class V) [Source:RGD Symbol;Acc:1306313]	2:243550627-243687857	0.133459	0.445605	0.107922	0.260931	0.277625	0.0973884	0.228995	0.211981	-0.111381	0.92726	1	-
NONRATT000490.2	1:82230930-82234051	3122	0.0655008	0.0691418	0.0635532	0.0695657	29.1945	20.5018	0.0660653	16.5886	7.97209	4.55986e-08	4.09878e-05	UP	trans	ENSRNOG00000024266	Haus5	HAUS augmin-like complex, subunit 5 [Source:RGD Symbol;Acc:2318093]	1:89109750-89124132	1.97272	1.62509	1.66003	1.54496	1.59667	1.67028	1.75261	1.60397	-0.127858	0.472342	0.985627	-
NONRATT000490.2	1:82230930-82234051	3122	0.0655008	0.0691418	0.0635532	0.0695657	29.1945	20.5018	0.0660653	16.5886	7.97209	4.55986e-08	4.09878e-05	UP	trans	ENSRNOG00000001134	Rfc5	replication factor C (activator 1) 5 [Source:RGD Symbol;Acc:1309280]	12:44931494-44941324	4.68202	4.32869	4.51032	4.01615	5.25113	3.52834	4.50701	4.26521	-0.0795544	0.66023	1	-
NONRATT000490.2	1:82230930-82234051	3122	0.0655008	0.0691418	0.0635532	0.0695657	29.1945	20.5018	0.0660653	16.5886	7.97209	4.55986e-08	4.09878e-05	UP	trans	ENSRNOG00000015150	Spg7	spastic paraplegia 7 homolog (human) [Source:RGD Symbol;Acc:727940]	19:55880561-55915502	9.72246	13.5925	9.72067	10.6499	12.6007	13.4655	11.0119	12.2387	0.152391	0.236484	0.860812	-
NONRATT000490.2	1:82230930-82234051	3122	0.0655008	0.0691418	0.0635532	0.0695657	29.1945	20.5018	0.0660653	16.5886	7.97209	4.55986e-08	4.09878e-05	UP	trans	ENSRNOG00000004158	Hdac9	histone deacetylase 9 [Source:RGD Symbol;Acc:1310748]	6:53488883-54059119	5.5243	5.41303	5.53962	6.23852	5.93354	5.06133	5.49232	5.74447	0.0647581	0.502592	0.985627	-
NONRATT000490.2	1:82230930-82234051	3122	0.0655008	0.0691418	0.0635532	0.0695657	29.1945	20.5018	0.0660653	16.5886	7.97209	4.55986e-08	4.09878e-05	UP	trans	ENSRNOG00000000394	Srgn	serglycin [Source:RGD Symbol;Acc:619969]	20:32120320-32139789	5.9778	7.97474	6.50568	7.18498	5.73004	4.95312	6.8194	5.95605	-0.195291	0.248209	0.866649	-
NONRATT000490.2	1:82230930-82234051	3122	0.0655008	0.0691418	0.0635532	0.0695657	29.1945	20.5018	0.0660653	16.5886	7.97209	4.55986e-08	4.09878e-05	UP	trans	ENSRNOG00000036760	Tmc5	transmembrane channel-like 5 [Source:RGD Symbol;Acc:1307037]	1:188278469-188337308	1.27285	1.09811	1.45972	0.987207	1.44433	1.14005	1.27689	1.19053	-0.101037	0.651404	1	-
NONRATT000490.2	1:82230930-82234051	3122	0.0655008	0.0691418	0.0635532	0.0695657	29.1945	20.5018	0.0660653	16.5886	7.97209	4.55986e-08	4.09878e-05	UP	trans	ENSRNOG00000014584	Odf2	outer dense fiber of sperm tails 2 [Source:RGD Symbol;Acc:3229]	3:8450275-8496008	10.228	10.8149	10.3546	9.93254	9.64621	8.85098	10.4659	9.47658	-0.143254	0.0977163	0.635044	-
NONRATT000490.2	1:82230930-82234051	3122	0.0655008	0.0691418	0.0635532	0.0695657	29.1945	20.5018	0.0660653	16.5886	7.97209	4.55986e-08	4.09878e-05	UP	trans	ENSRNOG00000031162	Ccl24	chemokine (C-C motif) ligand 24 [Source:RGD Symbol;Acc:1310245]	12:24148567-24152625	0.704244	0.386148	0.300675	0.270368	0.210959	0.123338	0.463689	0.201555	-1.20199	0.0123896	0.232684	-
NONRATT000490.2	1:82230930-82234051	3122	0.0655008	0.0691418	0.0635532	0.0695657	29.1945	20.5018	0.0660653	16.5886	7.97209	4.55986e-08	4.09878e-05	UP	trans	ENSRNOG00000017181	Malt1	MALT1 paracaspase [Source:RGD Symbol;Acc:1309195]	18:61109069-61162445	4.51648	4.69527	4.52152	5.49491	4.86327	5.83207	4.57775	5.39675	0.237451	0.0321924	0.384443	-
NONRATT000490.2	1:82230930-82234051	3122	0.0655008	0.0691418	0.0635532	0.0695657	29.1945	20.5018	0.0660653	16.5886	7.97209	4.55986e-08	4.09878e-05	UP	trans	ENSRNOG00000019727	Dph3	diphthamide biosynthesis 3 [Source:RGD Symbol;Acc:1590566]	16:8202048-8207464	6.69334	6.21689	6.51843	6.69992	6.60522	7.16851	6.47622	6.82455	0.075582	0.482152	0.985627	-
NONRATT000490.2	1:82230930-82234051	3122	0.0655008	0.0691418	0.0635532	0.0695657	29.1945	20.5018	0.0660653	16.5886	7.97209	4.55986e-08	4.09878e-05	UP	trans	ENSRNOG00000019629	Lamp1	lysosomal-associated membrane protein 1 [Source:RGD Symbol;Acc:2989]	16:81689590-81706561	235.882	237.935	238.169	220.417	226.209	228.586	237.329	225.071	-0.0765075	0.242035	0.86383	-
NONRATT000490.2	1:82230930-82234051	3122	0.0655008	0.0691418	0.0635532	0.0695657	29.1945	20.5018	0.0660653	16.5886	7.97209	4.55986e-08	4.09878e-05	UP	trans	ENSRNOG00000012037	Galnt7	polypeptide N-acetylgalactosaminyltransferase 7 [Source:RGD Symbol;Acc:620362]	16:35934970-36062719	7.22681	7.34749	7.41127	6.97679	7.9	7.66139	7.32853	7.51272	0.0358128	0.691238	1	-
NONRATT000490.2	1:82230930-82234051	3122	0.0655008	0.0691418	0.0635532	0.0695657	29.1945	20.5018	0.0660653	16.5886	7.97209	4.55986e-08	4.09878e-05	UP	trans	ENSRNOG00000029064	Zcchc4	zinc finger, CCHC domain containing 4 [Source:RGD Symbol;Acc:1311414]	14:60511497-60552990	2.59968	2.44032	3.4763	3.11046	2.88871	2.98468	2.83877	2.99462	0.077107	0.695879	1	-
NONRATT000490.2	1:82230930-82234051	3122	0.0655008	0.0691418	0.0635532	0.0695657	29.1945	20.5018	0.0660653	16.5886	7.97209	4.55986e-08	4.09878e-05	UP	trans	ENSRNOG00000005006	Ndufaf1	NADH dehydrogenase (ubiquinone) complex I, assembly factor 1 [Source:RGD Symbol;Acc:1306202]	3:111458572-111469518	16.6459	14.6918	14.5174	13.7193	14.4159	12.9581	15.285	13.6978	-0.158181	0.156201	0.74887	-
NONRATT000490.2	1:82230930-82234051	3122	0.0655008	0.0691418	0.0635532	0.0695657	29.1945	20.5018	0.0660653	16.5886	7.97209	4.55986e-08	4.09878e-05	UP	trans	ENSRNOG00000003298	Cd247	Cd247 molecule [Source:RGD Symbol;Acc:2305]	13:83996080-84071400	0.0458861	0.145174	0.0890601	0.0489472	0	0	0.0933734	0.0163157	-2.51675	0.133403	0.713397	-
NONRATT000490.2	1:82230930-82234051	3122	0.0655008	0.0691418	0.0635532	0.0695657	29.1945	20.5018	0.0660653	16.5886	7.97209	4.55986e-08	4.09878e-05	UP	trans	ENSRNOG00000001073	RGD1563482	similar to hypothetical protein FLJ38663 [Source:RGD Symbol;Acc:1563482]	12:37677019-37699616	1.20986	1.05646	1.32076	1.33056	1.43935	1.13819	1.19569	1.3027	0.123653	0.550561	0.995443	-
NONRATT000490.2	1:82230930-82234051	3122	0.0655008	0.0691418	0.0635532	0.0695657	29.1945	20.5018	0.0660653	16.5886	7.97209	4.55986e-08	4.09878e-05	UP	trans	ENSRNOG00000021213	Lix1l	Lix1-like [Source:RGD Symbol;Acc:1593161]	2:198726118-198751985	12.6958	13.8293	12.8338	13.0212	13.9727	12.037	13.1196	13.0103	-0.0120722	0.926136	1	-
NONRATT000490.2	1:82230930-82234051	3122	0.0655008	0.0691418	0.0635532	0.0695657	29.1945	20.5018	0.0660653	16.5886	7.97209	4.55986e-08	4.09878e-05	UP	trans	ENSRNOG00000002549	Htr5b	5-hydroxytryptamine (serotonin) receptor 5B [Source:RGD Symbol;Acc:62388]	13:37479758-37492680	0	0.111728	0.034288	0.0753407	0.132254	0.116003	0.0486719	0.107866	1.14808	0.405764	0.963023	-
NONRATT000490.2	1:82230930-82234051	3122	0.0655008	0.0691418	0.0635532	0.0695657	29.1945	20.5018	0.0660653	16.5886	7.97209	4.55986e-08	4.09878e-05	UP	trans	ENSRNOG00000003111	Ovca2	ovarian tumor suppressor candidate 2 [Source:RGD Symbol;Acc:1564623]	10:62017347-62020509	4.59088	3.12401	4.42893	4.35505	3.96455	4.55816	4.04794	4.29259	0.0846605	0.608581	1	-
NONRATT000490.2	1:82230930-82234051	3122	0.0655008	0.0691418	0.0635532	0.0695657	29.1945	20.5018	0.0660653	16.5886	7.97209	4.55986e-08	4.09878e-05	UP	trans	ENSRNOG00000026762	RT1-DOa	RT1 class II, locus DOa [Source:RGD Symbol;Acc:3477]	20:3889370-3892449	0.0744559	0.0261824	0.0481703	0.158819	0.0619642	0.0271842	0.0496029	0.0826559	0.736694	0.635604	1	-
NONRATT000490.2	1:82230930-82234051	3122	0.0655008	0.0691418	0.0635532	0.0695657	29.1945	20.5018	0.0660653	16.5886	7.97209	4.55986e-08	4.09878e-05	UP	trans	ENSRNOG00000023312	Lonrf2	LON peptidase N-terminal domain and ring finger 2 [Source:RGD Symbol;Acc:1562137]	9:45466688-45505767	90.6862	94.6731	93.1615	93.1723	93.788	96.8227	92.8403	94.5943	0.027003	0.629321	1	-
NONRATT000490.2	1:82230930-82234051	3122	0.0655008	0.0691418	0.0635532	0.0695657	29.1945	20.5018	0.0660653	16.5886	7.97209	4.55986e-08	4.09878e-05	UP	trans	ENSRNOG00000003622	Cybb	cytochrome b-245, beta polypeptide [Source:RGD Symbol;Acc:620574]	X:14578264-14612547	1.9049	1.75752	1.88399	3.51596	2.14905	1.44366	1.8488	2.36956	0.358028	0.171499	0.773801	-
NONRATT000490.2	1:82230930-82234051	3122	0.0655008	0.0691418	0.0635532	0.0695657	29.1945	20.5018	0.0660653	16.5886	7.97209	4.55986e-08	4.09878e-05	UP	trans	ENSRNOG00000012818	Ksr1	kinase suppressor of ras 1 [Source:RGD Symbol;Acc:1308105]	10:66347358-66482150	1.74712	1.82241	1.5495	1.60273	1.96971	1.89202	1.70634	1.82149	0.0942078	0.592258	1	-
NONRATT000490.2	1:82230930-82234051	3122	0.0655008	0.0691418	0.0635532	0.0695657	29.1945	20.5018	0.0660653	16.5886	7.97209	4.55986e-08	4.09878e-05	UP	trans	ENSRNOG00000014049	Riok1	RIO kinase 1 [Source:RGD Symbol;Acc:1306086]	17:27429416-27452314	8.9457	9.21704	9.05262	8.01358	8.13516	8.72965	9.07179	8.2928	-0.129528	0.230913	0.856823	-
NONRATT000490.2	1:82230930-82234051	3122	0.0655008	0.0691418	0.0635532	0.0695657	29.1945	20.5018	0.0660653	16.5886	7.97209	4.55986e-08	4.09878e-05	UP	trans	ENSRNOG00000021555	Mis18a	MIS18 kinetochore protein A [Source:RGD Symbol;Acc:1310778]	11:30879887-30893310	0	0.941811	0.611824	0	0	0.0575407	0.517878	0.0191802	-4.75492	0.000454164	0.0269218	DOWN
NONRATT000490.2	1:82230930-82234051	3122	0.0655008	0.0691418	0.0635532	0.0695657	29.1945	20.5018	0.0660653	16.5886	7.97209	4.55986e-08	4.09878e-05	UP	trans	ENSRNOG00000009348	Nos3	nitric oxide synthase 3, endothelial cell [Source:RGD Symbol;Acc:3186]	4:7320668-7342410	3.41995	4.25062	4.20827	3.24363	3.59665	2.45341	3.95961	3.09789	-0.354071	0.0214427	0.31622	-
NONRATT000490.2	1:82230930-82234051	3122	0.0655008	0.0691418	0.0635532	0.0695657	29.1945	20.5018	0.0660653	16.5886	7.97209	4.55986e-08	4.09878e-05	UP	trans	ENSRNOG00000022971	LOC102555919	zinc finger protein 454-like [Source:RGD Symbol;Acc:7529496]	10:36361312-36372436	3.28487	3.01614	3.97546	2.71589	2.83323	3.13131	3.42549	2.89348	-0.243505	0.110334	0.668532	-
NONRATT000490.2	1:82230930-82234051	3122	0.0655008	0.0691418	0.0635532	0.0695657	29.1945	20.5018	0.0660653	16.5886	7.97209	4.55986e-08	4.09878e-05	UP	trans	ENSRNOG00000034134	Cpm	carboxypeptidase M [Source:RGD Symbol;Acc:1310532]	7:60654350-60714620	18.327	17.8696	18.4812	13.6275	17.8339	16.4434	18.2259	15.9683	-0.190784	0.0517655	0.477497	-
NONRATT000490.2	1:82230930-82234051	3122	0.0655008	0.0691418	0.0635532	0.0695657	29.1945	20.5018	0.0660653	16.5886	7.97209	4.55986e-08	4.09878e-05	UP	trans	ENSRNOG00000047080	Gng4	guanine nucleotide binding protein (G protein), gamma 4 [Source:RGD Symbol;Acc:620806]	17:90266794-90315492	16.4472	15.3151	17.397	11.9703	12.6808	13.141	16.3864	12.5974	-0.379382	5.09902e-05	0.00554367	-
NONRATT000490.2	1:82230930-82234051	3122	0.0655008	0.0691418	0.0635532	0.0695657	29.1945	20.5018	0.0660653	16.5886	7.97209	4.55986e-08	4.09878e-05	UP	trans	ENSRNOG00000048606	Vma21	VMA21 vacuolar H+-ATPase homolog (S. cerevisiae) [Source:RGD Symbol;Acc:1566155]	16:70142761-70242979	1.20374	1.16853	1.46472	0.876184	0.953971	0.857578	1.279	0.895911	-0.513586	0.0150244	0.261321	-
NONRATT000490.2	1:82230930-82234051	3122	0.0655008	0.0691418	0.0635532	0.0695657	29.1945	20.5018	0.0660653	16.5886	7.97209	4.55986e-08	4.09878e-05	UP	trans	ENSRNOG00000001189	Sik1	salt-inducible kinase 1 [Source:RGD Symbol;Acc:69407]	20:10668411-10680283	4.4482	5.1544	5.00273	4.81076	4.80668	4.92109	4.86845	4.84617	-0.00661556	0.987932	1	-
NONRATT000490.2	1:82230930-82234051	3122	0.0655008	0.0691418	0.0635532	0.0695657	29.1945	20.5018	0.0660653	16.5886	7.97209	4.55986e-08	4.09878e-05	UP	trans	ENSRNOG00000056011	AC139950.1	-	6:78172762-78180924	4.88475	4.62115	3.94263	4.67375	4.44464	4.44781	4.48284	4.52207	0.0125674	0.9504	1	-
NONRATT000490.2	1:82230930-82234051	3122	0.0655008	0.0691418	0.0635532	0.0695657	29.1945	20.5018	0.0660653	16.5886	7.97209	4.55986e-08	4.09878e-05	UP	trans	ENSRNOG00000016926	Plekhs1	pleckstrin homology domain containing, family S member 1 [Source:RGD Symbol;Acc:1559884]	1:277261681-277291370	0	0	0	0.0330249	0.038648	0.0339103	0	0.0351944	Inf	0.252613	0.866649	-
NONRATT000490.2	1:82230930-82234051	3122	0.0655008	0.0691418	0.0635532	0.0695657	29.1945	20.5018	0.0660653	16.5886	7.97209	4.55986e-08	4.09878e-05	UP	trans	ENSRNOG00000010855	Mrp63	mitochondrial ribosomal protein 63 [Source:RGD Symbol;Acc:1594654]	15:38095803-38097835	3.49254	3.12599	4.29543	3.20485	2.63589	3.86777	3.63799	3.23617	-0.168852	0.454293	0.985627	-
NONRATT000490.2	1:82230930-82234051	3122	0.0655008	0.0691418	0.0635532	0.0695657	29.1945	20.5018	0.0660653	16.5886	7.97209	4.55986e-08	4.09878e-05	UP	trans	ENSRNOG00000016632	Dsg3	desmoglein 3 [Source:RGD Symbol;Acc:1592103]	18:15650526-15688284	0	0.0234598	0.0108011	0.0237332	0	0	0.0114203	0.00791108	-0.529654	1	1	-
NONRATT000490.2	1:82230930-82234051	3122	0.0655008	0.0691418	0.0635532	0.0695657	29.1945	20.5018	0.0660653	16.5886	7.97209	4.55986e-08	4.09878e-05	UP	trans	ENSRNOG00000016683	Zfp668	zinc finger protein 668 [Source:RGD Symbol;Acc:1308623]	1:199310935-199320727	3.71494	3.13373	3.37955	3.51603	3.24585	3.20255	3.40941	3.32148	-0.037695	0.825136	1	-
NONRATT000490.2	1:82230930-82234051	3122	0.0655008	0.0691418	0.0635532	0.0695657	29.1945	20.5018	0.0660653	16.5886	7.97209	4.55986e-08	4.09878e-05	UP	trans	ENSRNOG00000003457	Ccdc64b	coiled-coil domain containing 64B [Source:RGD Symbol;Acc:1306729]	10:12980674-12992780	0.0139002	0	0	0.0148275	0	0	0.0046334	0.0049425	0.0931683	1	1	-
NONRATT000490.2	1:82230930-82234051	3122	0.0655008	0.0691418	0.0635532	0.0695657	29.1945	20.5018	0.0660653	16.5886	7.97209	4.55986e-08	4.09878e-05	UP	trans	ENSRNOG00000025423	Map3k13	mitogen-activated protein kinase kinase kinase 13 [Source:RGD Symbol;Acc:1561227]	11:82745735-82938357	6.9883	7.20383	7.63323	6.56748	6.53078	6.26755	7.27512	6.45527	-0.172494	0.0511823	0.474179	-
NONRATT000490.2	1:82230930-82234051	3122	0.0655008	0.0691418	0.0635532	0.0695657	29.1945	20.5018	0.0660653	16.5886	7.97209	4.55986e-08	4.09878e-05	UP	trans	ENSRNOG00000027787	Cdc6	cell division cycle 6 [Source:RGD Symbol;Acc:1309157]	10:86819472-86833402	0.139181	0.167717	0.154341	0.169629	0.322623	0.0653031	0.153746	0.185852	0.273603	0.721397	1	-
NONRATT000490.2	1:82230930-82234051	3122	0.0655008	0.0691418	0.0635532	0.0695657	29.1945	20.5018	0.0660653	16.5886	7.97209	4.55986e-08	4.09878e-05	UP	trans	ENSRNOG00000028662	Zfp69	zinc finger protein 69 [Source:RGD Symbol;Acc:2322990]	5:139857363-139864393	0.871512	1.05508	1.12757	0.894983	1.36984	0.989363	1.01805	1.08473	0.091523	0.763972	1	-
NONRATT000490.2	1:82230930-82234051	3122	0.0655008	0.0691418	0.0635532	0.0695657	29.1945	20.5018	0.0660653	16.5886	7.97209	4.55986e-08	4.09878e-05	UP	trans	ENSRNOG00000026488	Gltpd2	glycolipid transfer protein domain containing 2 [Source:RGD Symbol;Acc:1560459]	10:57125961-57128686	0.0640979	0.236602	0.124407	0.205087	0.160032	0.175448	0.141702	0.180189	0.346649	0.598198	1	-
NONRATT000490.2	1:82230930-82234051	3122	0.0655008	0.0691418	0.0635532	0.0695657	29.1945	20.5018	0.0660653	16.5886	7.97209	4.55986e-08	4.09878e-05	UP	trans	ENSRNOG00000014265	Tnfrsf19	tumor necrosis factor receptor superfamily, member 19 [Source:RGD Symbol;Acc:1564996]	15:41246308-41338284	10.418	10.5775	9.63542	10.8931	10.9465	11.0037	10.2103	10.9478	0.100608	0.251611	0.866649	-
NONRATT000490.2	1:82230930-82234051	3122	0.0655008	0.0691418	0.0635532	0.0695657	29.1945	20.5018	0.0660653	16.5886	7.97209	4.55986e-08	4.09878e-05	UP	trans	ENSRNOG00000014935	Peo1	progressive external ophthalmoplegia 1 [Source:RGD Symbol;Acc:1307884]	1:264756499-264762892	11.5517	12.5935	10.935	11.4608	11.5405	12.0027	11.6934	11.668	-0.00313946	1	1	-
NONRATT000490.2	1:82230930-82234051	3122	0.0655008	0.0691418	0.0635532	0.0695657	29.1945	20.5018	0.0660653	16.5886	7.97209	4.55986e-08	4.09878e-05	UP	trans	ENSRNOG00000012965	Themis2	thymocyte selection associated family member 2 [Source:RGD Symbol;Acc:1561016]	5:150970909-150987081	0.388492	0.368676	0.452364	0.600739	0.557632	0.55286	0.403177	0.57041	0.500586	0.0865829	0.604186	-
NONRATT000490.2	1:82230930-82234051	3122	0.0655008	0.0691418	0.0635532	0.0695657	29.1945	20.5018	0.0660653	16.5886	7.97209	4.55986e-08	4.09878e-05	UP	trans	ENSRNOG00000011321	Rftn1	raftlin lipid raft linker 1 [Source:RGD Symbol;Acc:1563347]	9:12740885-12942358	2.16221	2.22146	2.82443	2.01024	1.34943	1.57798	2.4027	1.64588	-0.545795	0.010712	0.213764	-
NONRATT000490.2	1:82230930-82234051	3122	0.0655008	0.0691418	0.0635532	0.0695657	29.1945	20.5018	0.0660653	16.5886	7.97209	4.55986e-08	4.09878e-05	UP	trans	ENSRNOG00000002509	Gnl3l	guanine nucleotide binding protein-like 3 (nucleolar)-like [Source:RGD Symbol;Acc:1600217]	X:20034874-20070593	65.0885	65.6931	66.8427	62.7757	62.4846	64.5147	65.8748	63.2583	-0.0584702	0.398726	0.960621	-
NONRATT000490.2	1:82230930-82234051	3122	0.0655008	0.0691418	0.0635532	0.0695657	29.1945	20.5018	0.0660653	16.5886	7.97209	4.55986e-08	4.09878e-05	UP	trans	ENSRNOG00000011885	Rhpn2	rhophilin, Rho GTPase binding protein 2 [Source:RGD Symbol;Acc:1308366]	1:91596397-91657395	5.75549	5.52417	4.84504	6.63622	5.80243	6.08516	5.3749	6.1746	0.200108	0.107207	0.65798	-
NONRATT000490.2	1:82230930-82234051	3122	0.0655008	0.0691418	0.0635532	0.0695657	29.1945	20.5018	0.0660653	16.5886	7.97209	4.55986e-08	4.09878e-05	UP	trans	ENSRNOG00000016825	Cd3eap	CD3e molecule, epsilon associated protein [Source:RGD Symbol;Acc:1591707]	1:80267725-80271001	1.38244	1.33624	1.37876	0.900937	1.67764	1.13504	1.36581	1.23787	-0.141899	0.609658	1	-
NONRATT000490.2	1:82230930-82234051	3122	0.0655008	0.0691418	0.0635532	0.0695657	29.1945	20.5018	0.0660653	16.5886	7.97209	4.55986e-08	4.09878e-05	UP	trans	ENSRNOG00000019653	Csrnp2	cysteine-serine-rich nuclear protein 2 [Source:RGD Symbol;Acc:1308916]	7:142116335-142132173	6.72361	6.38065	7.17679	6.82096	5.91769	6.51108	6.76035	6.41658	-0.0752942	0.501411	0.985627	-
NONRATT000490.2	1:82230930-82234051	3122	0.0655008	0.0691418	0.0635532	0.0695657	29.1945	20.5018	0.0660653	16.5886	7.97209	4.55986e-08	4.09878e-05	UP	trans	ENSRNOG00000000308	Zbtb24	zinc finger and BTB domain containing 24 [Source:RGD Symbol;Acc:1306951]	20:46168177-46189806	3.6166	3.52856	3.61026	3.14754	2.77596	3.3675	3.58514	3.097	-0.211157	0.142944	0.726041	-
NONRATT000490.2	1:82230930-82234051	3122	0.0655008	0.0691418	0.0635532	0.0695657	29.1945	20.5018	0.0660653	16.5886	7.97209	4.55986e-08	4.09878e-05	UP	trans	ENSRNOG00000002265	Casr	calcium-sensing receptor [Source:RGD Symbol;Acc:2277]	11:67188630-67258771	0.299666	0.546885	0.301965	0.0983286	0.0863142	0.0504637	0.382839	0.0783688	-2.28839	6.04183e-08	1.89656e-05	DOWN
NONRATT000490.2	1:82230930-82234051	3122	0.0655008	0.0691418	0.0635532	0.0695657	29.1945	20.5018	0.0660653	16.5886	7.97209	4.55986e-08	4.09878e-05	UP	trans	ENSRNOG00000028814	Oasl2	2'-5' oligoadenylate synthetase-like 2 [Source:RGD Symbol;Acc:1307351]	12:47469598-47482961	2.53069	1.66037	1.66441	2.75877	2.59719	1.26205	1.95182	2.20601	0.176614	0.557153	0.996827	-
NONRATT000490.2	1:82230930-82234051	3122	0.0655008	0.0691418	0.0635532	0.0695657	29.1945	20.5018	0.0660653	16.5886	7.97209	4.55986e-08	4.09878e-05	UP	trans	ENSRNOG00000019165	Mrpl51	mitochondrial ribosomal protein L51 [Source:RGD Symbol;Acc:1306686]	4:157705790-157708748	35.6266	32.2592	35.117	35.2039	33.9715	32.9474	34.3342	34.0409	-0.0123784	0.910429	1	-
NONRATT000490.2	1:82230930-82234051	3122	0.0655008	0.0691418	0.0635532	0.0695657	29.1945	20.5018	0.0660653	16.5886	7.97209	4.55986e-08	4.09878e-05	UP	trans	ENSRNOG00000051408	Magt1	magnesium transporter 1 [Source:RGD Symbol;Acc:620094]	X:77020402-77061667	8.33701	7.49742	7.14174	8.35872	7.21424	7.23751	7.65872	7.60349	-0.0104418	0.945408	1	-
NONRATT000490.2	1:82230930-82234051	3122	0.0655008	0.0691418	0.0635532	0.0695657	29.1945	20.5018	0.0660653	16.5886	7.97209	4.55986e-08	4.09878e-05	UP	trans	ENSRNOG00000048138	Zfp566	zinc finger protein 566 [Source:RGD Symbol;Acc:1563239]	1:88415257-88428685	0.556265	0.586537	0.584736	0.840374	0.289289	0.30444	0.575846	0.478034	-0.26857	0.604988	1	-
NONRATT000490.2	1:82230930-82234051	3122	0.0655008	0.0691418	0.0635532	0.0695657	29.1945	20.5018	0.0660653	16.5886	7.97209	4.55986e-08	4.09878e-05	UP	trans	ENSRNOG00000015746	Kcng4	potassium channel, voltage gated modifier subfamily G, member 4 [Source:RGD Symbol;Acc:1308553]	19:52270927-52282877	10.7974	10.5719	12.6103	11.1857	14.8008	14.1628	11.3265	13.3831	0.240706	0.0352623	0.398884	-
NONRATT000490.2	1:82230930-82234051	3122	0.0655008	0.0691418	0.0635532	0.0695657	29.1945	20.5018	0.0660653	16.5886	7.97209	4.55986e-08	4.09878e-05	UP	trans	ENSRNOG00000013110	Nudt2	nudix (nucleoside diphosphate linked moiety X)-type motif 2 [Source:RGD Symbol;Acc:1303023]	5:57845819-57860658	26.3149	25.1916	21.5032	23.6321	25.823	26.9118	24.3366	25.4556	0.064858	0.586802	1	-
NONRATT000490.2	1:82230930-82234051	3122	0.0655008	0.0691418	0.0635532	0.0695657	29.1945	20.5018	0.0660653	16.5886	7.97209	4.55986e-08	4.09878e-05	UP	trans	ENSRNOG00000014083	Iqsec3	IQ motif and Sec7 domain 3 [Source:RGD Symbol;Acc:1593191]	4:153948055-154044493	26.0454	27.8319	28.3714	25.2738	28.5478	29.6198	27.4162	27.8138	0.0207723	0.758987	1	-
NONRATT000490.2	1:82230930-82234051	3122	0.0655008	0.0691418	0.0635532	0.0695657	29.1945	20.5018	0.0660653	16.5886	7.97209	4.55986e-08	4.09878e-05	UP	trans	ENSRNOG00000038365	Plekha2	pleckstrin homology domain-containing, family A (phosphoinositide binding specific) member 2 [Source:RGD Symbol;Acc:1586710]	16:71738718-71787787	3.15558	3.32735	3.14873	3.65094	3.30708	3.03076	3.21055	3.32959	0.0525236	0.663753	1	-
NONRATT000490.2	1:82230930-82234051	3122	0.0655008	0.0691418	0.0635532	0.0695657	29.1945	20.5018	0.0660653	16.5886	7.97209	4.55986e-08	4.09878e-05	UP	trans	ENSRNOG00000020377	Cideb	cell death-inducing DFFA-like effector b [Source:RGD Symbol;Acc:1310000]	15:34439876-34444244	0	0	0.0613313	0	0	0.0691881	0.0204438	0.0230627	0.1739	1	1	-
NONRATT000490.2	1:82230930-82234051	3122	0.0655008	0.0691418	0.0635532	0.0695657	29.1945	20.5018	0.0660653	16.5886	7.97209	4.55986e-08	4.09878e-05	UP	trans	ENSRNOG00000025895	Sdpr	serum deprivation response [Source:RGD Symbol;Acc:1359345]	9:55243255-55256340	4.93764	4.55885	5.17269	5.31804	5.05924	4.14133	4.88973	4.83954	-0.0148858	0.939023	1	-
NONRATT000490.2	1:82230930-82234051	3122	0.0655008	0.0691418	0.0635532	0.0695657	29.1945	20.5018	0.0660653	16.5886	7.97209	4.55986e-08	4.09878e-05	UP	trans	ENSRNOG00000004555	Sec14l4	SEC14-like 4 (S. cerevisiae) [Source:RGD Symbol;Acc:1565810]	14:84274550-84319449	0.0796304	0.0763322	0.0421435	0.0694781	0.0993878	0.0475423	0.0660354	0.0721361	0.127482	0.807951	1	-
NONRATT000490.2	1:82230930-82234051	3122	0.0655008	0.0691418	0.0635532	0.0695657	29.1945	20.5018	0.0660653	16.5886	7.97209	4.55986e-08	4.09878e-05	UP	trans	ENSRNOG00000026110	Scml4	sex comb on midleg-like 4 (Drosophila) [Source:RGD Symbol;Acc:1310898]	20:47596575-47689245	0.474863	1.25894	0.434454	0.564278	0.440313	0.401018	0.722751	0.468536	-0.625337	0.113255	0.676248	-
NONRATT000490.2	1:82230930-82234051	3122	0.0655008	0.0691418	0.0635532	0.0695657	29.1945	20.5018	0.0660653	16.5886	7.97209	4.55986e-08	4.09878e-05	UP	trans	ENSRNOG00000026702	Amica1	adhesion molecule, interacts with CXADR antigen 1 [Source:RGD Symbol;Acc:1562572]	8:49378644-49410088	0.116849	0.338783	0.226735	0.342654	0.145831	0.191836	0.227455	0.226773	-0.0043324	1	1	-
NONRATT000490.2	1:82230930-82234051	3122	0.0655008	0.0691418	0.0635532	0.0695657	29.1945	20.5018	0.0660653	16.5886	7.97209	4.55986e-08	4.09878e-05	UP	trans	ENSRNOG00000002254	Tmem33	transmembrane protein 33 [Source:RGD Symbol;Acc:708371]	14:42535701-42560174	45.8101	47.6765	45.654	47.1901	43.9736	45.8183	46.3802	45.6607	-0.0225573	0.779822	1	-
NONRATT000490.2	1:82230930-82234051	3122	0.0655008	0.0691418	0.0635532	0.0695657	29.1945	20.5018	0.0660653	16.5886	7.97209	4.55986e-08	4.09878e-05	UP	trans	ENSRNOG00000012358	Pcyt1b	phosphate cytidylyltransferase 1, choline, beta [Source:RGD Symbol;Acc:708434]	X:62727755-62818522	15.1368	13.9657	13.1262	13.4922	14.981	13.9426	14.0763	14.1386	0.0063715	0.935833	1	-
NONRATT000490.2	1:82230930-82234051	3122	0.0655008	0.0691418	0.0635532	0.0695657	29.1945	20.5018	0.0660653	16.5886	7.97209	4.55986e-08	4.09878e-05	UP	trans	ENSRNOG00000009250	Pts	6-pyruvoyl-tetrahydropterin synthase [Source:RGD Symbol;Acc:68367]	8:54954226-54961265	8.50946	10.4795	8.8876	10.8758	6.7296	8.17754	9.29218	8.59431	-0.112634	0.571472	1	-
NONRATT000490.2	1:82230930-82234051	3122	0.0655008	0.0691418	0.0635532	0.0695657	29.1945	20.5018	0.0660653	16.5886	7.97209	4.55986e-08	4.09878e-05	UP	trans	ENSRNOG00000011975	Crtc3	CREB regulated transcription coactivator 3 [Source:RGD Symbol;Acc:1309666]	1:142393207-142500383	1.6251	1.48676	1.57693	1.2743	1.46165	1.28193	1.56293	1.33929	-0.222781	0.277047	0.880986	-
NONRATT000490.2	1:82230930-82234051	3122	0.0655008	0.0691418	0.0635532	0.0695657	29.1945	20.5018	0.0660653	16.5886	7.97209	4.55986e-08	4.09878e-05	UP	trans	ENSRNOG00000019212	Tpp1	tripeptidyl peptidase I [Source:RGD Symbol;Acc:621296]	1:170588035-170594168	41.3895	40.4989	43.2405	49.7537	47.1093	47.1146	41.7097	47.9925	0.202429	0.0044614	0.127868	-
NONRATT000490.2	1:82230930-82234051	3122	0.0655008	0.0691418	0.0635532	0.0695657	29.1945	20.5018	0.0660653	16.5886	7.97209	4.55986e-08	4.09878e-05	UP	trans	ENSRNOG00000006523	Atl2	atlastin GTPase 2 [Source:RGD Symbol;Acc:1305125]	6:2568990-2610437	16.7809	18.3112	19.3652	17.5214	16.7524	18.6994	18.1524	17.6577	-0.039861	0.674999	1	-
NONRATT000490.2	1:82230930-82234051	3122	0.0655008	0.0691418	0.0635532	0.0695657	29.1945	20.5018	0.0660653	16.5886	7.97209	4.55986e-08	4.09878e-05	UP	trans	ENSRNOG00000049115	Ccr5	chemokine (C-C motif) receptor 5 [Source:RGD Symbol;Acc:620596]	8:133197032-133215614	7.14518	6.12715	8.95916	5.89849	8.05892	6.33758	7.4105	6.765	-0.131481	0.407713	0.963081	-
NONRATT000490.2	1:82230930-82234051	3122	0.0655008	0.0691418	0.0635532	0.0695657	29.1945	20.5018	0.0660653	16.5886	7.97209	4.55986e-08	4.09878e-05	UP	trans	ENSRNOG00000042289	Plcxd2	phosphatidylinositol-specific phospholipase C, X domain containing 2 [Source:RGD Symbol;Acc:1563504]	11:57207656-57260568	29.6786	27.9678	28.9465	28.267	28.1878	26.8934	28.8643	27.7827	-0.0551002	0.438553	0.982138	-
NONRATT000490.2	1:82230930-82234051	3122	0.0655008	0.0691418	0.0635532	0.0695657	29.1945	20.5018	0.0660653	16.5886	7.97209	4.55986e-08	4.09878e-05	UP	trans	ENSRNOG00000001339	Psmd9	proteasome (prosome, macropain) 26S subunit, non-ATPase, 9 [Source:RGD Symbol;Acc:621110]	12:38786540-38805121	6.47477	5.65857	6.7923	6.09619	6.33434	8.10961	6.30855	6.84671	0.118104	0.499655	0.985627	-
NONRATT000490.2	1:82230930-82234051	3122	0.0655008	0.0691418	0.0635532	0.0695657	29.1945	20.5018	0.0660653	16.5886	7.97209	4.55986e-08	4.09878e-05	UP	trans	ENSRNOG00000018901	Rab14	RAB14, member RAS oncogene family [Source:RGD Symbol;Acc:620881]	3:14375249-14386118	62.4143	60.0917	60.9043	62.0196	59.63	54.7878	61.1368	58.8125	-0.0559186	0.507586	0.985627	-
NONRATT000490.2	1:82230930-82234051	3122	0.0655008	0.0691418	0.0635532	0.0695657	29.1945	20.5018	0.0660653	16.5886	7.97209	4.55986e-08	4.09878e-05	UP	trans	ENSRNOG00000009599	Rwdd2a	RWD domain containing 2A [Source:RGD Symbol;Acc:1306231]	8:94243372-94246496	1.29445	1.25569	1.75852	1.87737	1.8096	1.58704	1.43622	1.758	0.29166	0.306709	0.89899	-
NONRATT000490.2	1:82230930-82234051	3122	0.0655008	0.0691418	0.0635532	0.0695657	29.1945	20.5018	0.0660653	16.5886	7.97209	4.55986e-08	4.09878e-05	UP	trans	ENSRNOG00000032703	Rasgrp3	RAS guanyl releasing protein 3 (calcium and DAG-regulated) [Source:RGD Symbol;Acc:1304612]	6:21072634-21135880	25.0031	25.132	24.6349	22.3965	28.0118	26.6174	24.9233	25.6752	0.0428802	0.606086	1	-
NONRATT000490.2	1:82230930-82234051	3122	0.0655008	0.0691418	0.0635532	0.0695657	29.1945	20.5018	0.0660653	16.5886	7.97209	4.55986e-08	4.09878e-05	UP	trans	ENSRNOG00000022893	Rimbp2	RIMS binding protein 2 [Source:RGD Symbol;Acc:708533]	12:31530699-31620760	7.9864	8.17718	8.4482	8.58092	7.9898	8.88344	8.20393	8.48472	0.0485526	0.516097	0.985627	-
NONRATT000490.2	1:82230930-82234051	3122	0.0655008	0.0691418	0.0635532	0.0695657	29.1945	20.5018	0.0660653	16.5886	7.97209	4.55986e-08	4.09878e-05	UP	trans	ENSRNOG00000001426	Prkrip1	Prkr interacting protein 1 (IL11 inducible) [Source:RGD Symbol;Acc:1595708]	12:23514981-23535968	8.41608	8.69187	8.85655	8.03257	8.01056	8.51896	8.65483	8.18737	-0.0801069	0.426002	0.973718	-
NONRATT000490.2	1:82230930-82234051	3122	0.0655008	0.0691418	0.0635532	0.0695657	29.1945	20.5018	0.0660653	16.5886	7.97209	4.55986e-08	4.09878e-05	UP	trans	ENSRNOG00000020444	Hcn3	hyperpolarization-activated cyclic nucleotide-gated potassium channel 3 [Source:RGD Symbol;Acc:620691]	2:188454853-188471988	5.69248	6.60774	6.19944	6.37026	5.855	6.25831	6.16655	6.16119	-0.0012537	0.983388	1	-
NONRATT000490.2	1:82230930-82234051	3122	0.0655008	0.0691418	0.0635532	0.0695657	29.1945	20.5018	0.0660653	16.5886	7.97209	4.55986e-08	4.09878e-05	UP	trans	ENSRNOG00000001050	Eif2ak1	eukaryotic translation initiation factor 2 alpha kinase 1 [Source:RGD Symbol;Acc:70883]	12:12749037-12782146	23.7373	26.6857	22.8644	24.4766	26.2881	24.8388	24.4291	25.2012	0.0448869	0.587565	1	-
NONRATT000490.2	1:82230930-82234051	3122	0.0655008	0.0691418	0.0635532	0.0695657	29.1945	20.5018	0.0660653	16.5886	7.97209	4.55986e-08	4.09878e-05	UP	trans	ENSRNOG00000059765	Asic1	Acid-sensing ion channel 1 [Source:UniProtKB/Swiss-Prot;Acc:P55926]	7:141326321-141354937	15.0896	16.0832	16.0687	14.2112	15.5733	12.8717	15.7472	14.2187	-0.147302	0.101687	0.644374	-
NONRATT000490.2	1:82230930-82234051	3122	0.0655008	0.0691418	0.0635532	0.0695657	29.1945	20.5018	0.0660653	16.5886	7.97209	4.55986e-08	4.09878e-05	UP	trans	ENSRNOG00000019817	Ddx28	DEAD (Asp-Glu-Ala-Asp) box polypeptide 28 [Source:RGD Symbol;Acc:1311976]	19:37988423-37990353	4.66542	4.91938	4.56655	4.97535	5.01314	4.84082	4.71712	4.9431	0.0675116	0.666223	1	-
NONRATT000490.2	1:82230930-82234051	3122	0.0655008	0.0691418	0.0635532	0.0695657	29.1945	20.5018	0.0660653	16.5886	7.97209	4.55986e-08	4.09878e-05	UP	trans	ENSRNOG00000011560	Mtmr9	myotubularin related protein 9 [Source:RGD Symbol;Acc:628840]	15:46693383-46719252	29.0987	30.8055	30.9244	29.5686	29.9549	31.1884	30.2762	30.2373	-0.00185546	0.982641	1	-
NONRATT000490.2	1:82230930-82234051	3122	0.0655008	0.0691418	0.0635532	0.0695657	29.1945	20.5018	0.0660653	16.5886	7.97209	4.55986e-08	4.09878e-05	UP	trans	ENSRNOG00000038445	Rnf225	ring finger protein 225 [Source:RGD Symbol;Acc:1561909]	1:65657276-65659945	0	0.0722574	0.0332681	0.255812	0	0.150045	0.0351751	0.135286	1.94338	0.108207	0.662508	-
NONRATT000490.2	1:82230930-82234051	3122	0.0655008	0.0691418	0.0635532	0.0695657	29.1945	20.5018	0.0660653	16.5886	7.97209	4.55986e-08	4.09878e-05	UP	trans	ENSRNOG00000018574	Qsox2	quiescin Q6 sulfhydryl oxidase 2 [Source:RGD Symbol;Acc:1584720]	3:3662324-3691972	5.98444	6.39934	7.03741	6.5082	5.48623	6.14406	6.47373	6.04616	-0.0985777	0.401473	0.960761	-
NONRATT000490.2	1:82230930-82234051	3122	0.0655008	0.0691418	0.0635532	0.0695657	29.1945	20.5018	0.0660653	16.5886	7.97209	4.55986e-08	4.09878e-05	UP	trans	ENSRNOG00000013171	Grm2	glutamate receptor, metabotropic 2 [Source:RGD Symbol;Acc:2743]	8:115344999-115358046	2.37753	2.70533	2.48965	2.88204	2.26306	2.78993	2.52417	2.64501	0.0674645	0.633104	1	-
NONRATT000490.2	1:82230930-82234051	3122	0.0655008	0.0691418	0.0635532	0.0695657	29.1945	20.5018	0.0660653	16.5886	7.97209	4.55986e-08	4.09878e-05	UP	trans	ENSRNOG00000022939	Gpkow	G patch domain and KOW motifs [Source:RGD Symbol;Acc:1583600]	X:15636563-15651332	12.358	11.8443	11.0129	11.4411	10.9211	10.4489	11.7384	10.937	-0.102012	0.278747	0.88166	-
NONRATT000490.2	1:82230930-82234051	3122	0.0655008	0.0691418	0.0635532	0.0695657	29.1945	20.5018	0.0660653	16.5886	7.97209	4.55986e-08	4.09878e-05	UP	trans	ENSRNOG00000014628	Pomk	protein-O-mannose kinase [Source:RGD Symbol;Acc:1310810]	16:70859280-70869634	17.8493	18.7362	18.7247	19.2637	17.0607	15.4323	18.4367	17.2523	-0.0957995	0.329812	0.914238	-
NONRATT000490.2	1:82230930-82234051	3122	0.0655008	0.0691418	0.0635532	0.0695657	29.1945	20.5018	0.0660653	16.5886	7.97209	4.55986e-08	4.09878e-05	UP	trans	ENSRNOG00000014331	Zfp717	zinc finger protein 717 [Source:RGD Symbol;Acc:2319964]	8:23275936-23282989	24.9706	25.1254	24.2306	24.1931	24.5142	25.7777	24.7755	24.8283	0.00307145	0.933549	1	-
NONRATT000490.2	1:82230930-82234051	3122	0.0655008	0.0691418	0.0635532	0.0695657	29.1945	20.5018	0.0660653	16.5886	7.97209	4.55986e-08	4.09878e-05	UP	trans	ENSRNOG00000022268	Pnpla3	patatin-like phospholipase domain containing 3 [Source:RGD Symbol;Acc:1595843]	7:125034764-125055976	2.4123	2.49223	3.33389	3.06627	3.34555	2.13395	2.74614	2.84859	0.0528437	0.807943	1	-
NONRATT000490.2	1:82230930-82234051	3122	0.0655008	0.0691418	0.0635532	0.0695657	29.1945	20.5018	0.0660653	16.5886	7.97209	4.55986e-08	4.09878e-05	UP	trans	ENSRNOG00000009620	Cybrd1	cytochrome b reductase 1 [Source:RGD Symbol;Acc:1305740]	3:57718364-57746097	1.60488	2.11532	1.53786	2.18217	1.27704	1.18588	1.75269	1.54837	-0.178824	0.492432	0.985627	-
NONRATT000490.2	1:82230930-82234051	3122	0.0655008	0.0691418	0.0635532	0.0695657	29.1945	20.5018	0.0660653	16.5886	7.97209	4.55986e-08	4.09878e-05	UP	trans	ENSRNOG00000010572	Pus7	pseudouridylate synthase 7 [Source:RGD Symbol;Acc:1307054]	4:7889869-7930706	6.1217	5.51361	6.18782	6.6644	5.45222	6.21281	5.94104	6.10981	0.0404112	0.743741	1	-
NONRATT000490.2	1:82230930-82234051	3122	0.0655008	0.0691418	0.0635532	0.0695657	29.1945	20.5018	0.0660653	16.5886	7.97209	4.55986e-08	4.09878e-05	UP	trans	ENSRNOG00000016448	Eef2k	eukaryotic elongation factor-2 kinase [Source:RGD Symbol;Acc:2538]	1:190780236-190842324	12.0769	12.2489	12.2253	11.75	11.2243	12.3135	12.1837	11.7626	-0.0507453	0.57417	1	-
NONRATT000490.2	1:82230930-82234051	3122	0.0655008	0.0691418	0.0635532	0.0695657	29.1945	20.5018	0.0660653	16.5886	7.97209	4.55986e-08	4.09878e-05	UP	trans	ENSRNOG00000009076	Ttpal	tocopherol (alpha) transfer protein-like [Source:RGD Symbol;Acc:1305754]	3:159995064-160013274	11.7373	12.6615	12.1279	13.9058	13.5104	12.8488	12.1756	13.4217	0.140573	0.0763548	0.573487	-
NONRATT000490.2	1:82230930-82234051	3122	0.0655008	0.0691418	0.0635532	0.0695657	29.1945	20.5018	0.0660653	16.5886	7.97209	4.55986e-08	4.09878e-05	UP	trans	ENSRNOG00000025408	Duxbl1	double homeobox B-like 1 [Source:RGD Symbol;Acc:1311053]	16:3754968-3765917	2.57842	2.11906	2.55722	1.77924	2.86339	2.44904	2.41823	2.36389	-0.0327924	0.880178	1	-
NONRATT000490.2	1:82230930-82234051	3122	0.0655008	0.0691418	0.0635532	0.0695657	29.1945	20.5018	0.0660653	16.5886	7.97209	4.55986e-08	4.09878e-05	UP	trans	ENSRNOG00000005749	Foxred2	FAD-dependent oxidoreductase domain containing 2 [Source:RGD Symbol;Acc:1306763]	7:119170181-119185238	4.72472	4.92833	4.74901	5.27335	5.07298	4.28232	4.80069	4.87622	0.0225213	0.841338	1	-
NONRATT000490.2	1:82230930-82234051	3122	0.0655008	0.0691418	0.0635532	0.0695657	29.1945	20.5018	0.0660653	16.5886	7.97209	4.55986e-08	4.09878e-05	UP	trans	ENSRNOG00000020167	Reep5	receptor accessory protein 5 [Source:RGD Symbol;Acc:1306047]	18:27128464-27159693	194.712	189.332	189.256	176.276	176.411	171.131	191.1	174.606	-0.130228	0.0410653	0.428779	-
NONRATT000490.2	1:82230930-82234051	3122	0.0655008	0.0691418	0.0635532	0.0695657	29.1945	20.5018	0.0660653	16.5886	7.97209	4.55986e-08	4.09878e-05	UP	trans	ENSRNOG00000038720	Cdkl1	cyclin-dependent kinase-like 1 (CDC2-related kinase) [Source:RGD Symbol;Acc:1305080]	6:92077416-92121351	15.1806	15.8234	14.4774	16.1427	16.8851	15.7135	15.1605	16.2471	0.0998636	0.320036	0.909036	-
NONRATT000490.2	1:82230930-82234051	3122	0.0655008	0.0691418	0.0635532	0.0695657	29.1945	20.5018	0.0660653	16.5886	7.97209	4.55986e-08	4.09878e-05	UP	trans	ENSRNOG00000048861	LOC498122	similar to CG15908-PA [Source:RGD Symbol;Acc:1595717]	11:86299210-86303453	8.96085	10.2022	9.12204	7.15248	7.61665	7.2819	9.42837	7.35034	-0.359197	0.0117197	0.225896	-
NONRATT000490.2	1:82230930-82234051	3122	0.0655008	0.0691418	0.0635532	0.0695657	29.1945	20.5018	0.0660653	16.5886	7.97209	4.55986e-08	4.09878e-05	UP	trans	ENSRNOG00000014218	Tmem25	transmembrane protein 25 [Source:RGD Symbol;Acc:1596132]	8:49100759-49106177	14.0695	16.2669	15.4789	16.2216	18.0235	16.5503	15.2717	16.9318	0.148871	0.11626	0.684883	-
NONRATT000490.2	1:82230930-82234051	3122	0.0655008	0.0691418	0.0635532	0.0695657	29.1945	20.5018	0.0660653	16.5886	7.97209	4.55986e-08	4.09878e-05	UP	trans	ENSRNOG00000008064	Naga	N-acetyl galactosaminidase, alpha [Source:RGD Symbol;Acc:1306025]	7:123563059-123572082	15.7269	17.7536	16.374	15.3905	18.7064	17.6214	16.6182	17.2395	0.0529513	0.606462	1	-
NONRATT000490.2	1:82230930-82234051	3122	0.0655008	0.0691418	0.0635532	0.0695657	29.1945	20.5018	0.0660653	16.5886	7.97209	4.55986e-08	4.09878e-05	UP	trans	ENSRNOG00000000230	Lmf1	lipase maturation factor 1 [Source:RGD Symbol;Acc:1310180]	10:14945265-15031942	7.2603	6.85167	6.37586	7.27808	6.75137	7.07362	6.82928	7.03436	0.0426853	0.718294	1	-
NONRATT000490.2	1:82230930-82234051	3122	0.0655008	0.0691418	0.0635532	0.0695657	29.1945	20.5018	0.0660653	16.5886	7.97209	4.55986e-08	4.09878e-05	UP	trans	ENSRNOG00000018009	Rab8b	RAB8B, member RAS oncogene family [Source:RGD Symbol;Acc:628764]	8:72638003-72714664	13.6973	14.2187	14.3575	13.4923	13.5359	13.3651	14.0912	13.4644	-0.0656364	0.440196	0.982713	-
NONRATT000490.2	1:82230930-82234051	3122	0.0655008	0.0691418	0.0635532	0.0695657	29.1945	20.5018	0.0660653	16.5886	7.97209	4.55986e-08	4.09878e-05	UP	trans	ENSRNOG00000011663	Rnf7	ring finger protein 7 [Source:RGD Symbol;Acc:1311048]	8:104326719-104335729	4.80262	4.86677	5.44708	5.78683	3.81473	4.30155	5.03882	4.63437	-0.120713	0.571547	1	-
NONRATT000490.2	1:82230930-82234051	3122	0.0655008	0.0691418	0.0635532	0.0695657	29.1945	20.5018	0.0660653	16.5886	7.97209	4.55986e-08	4.09878e-05	UP	trans	ENSRNOG00000000841	Ddx39b	DEAD (Asp-Glu-Ala-Asp) box polypeptide 39B [Source:RGD Symbol;Acc:70923]	20:4806108-4818568	53.0859	55.0365	55.834	57.1573	57.1714	56.5934	54.6522	56.974	0.0600258	0.325089	0.912849	-
NONRATT000490.2	1:82230930-82234051	3122	0.0655008	0.0691418	0.0635532	0.0695657	29.1945	20.5018	0.0660653	16.5886	7.97209	4.55986e-08	4.09878e-05	UP	trans	ENSRNOG00000020076	RGD1311783	similar to RIKEN cDNA 2010012O05 [Source:RGD Symbol;Acc:1311783]	1:266451021-266464903	24.3713	27.2004	25.5636	20.7688	21.2073	23.6393	25.7118	21.8718	-0.233356	0.0123201	0.232149	-
NONRATT000490.2	1:82230930-82234051	3122	0.0655008	0.0691418	0.0635532	0.0695657	29.1945	20.5018	0.0660653	16.5886	7.97209	4.55986e-08	4.09878e-05	UP	trans	ENSRNOG00000026569	LOC102555377	zinc finger protein 182-like [Source:RGD Symbol;Acc:7744154]	1:62133816-62174310	6.47501	5.81713	6.14224	7.33865	6.1974	5.65785	6.14479	6.39797	0.0582496	0.656076	1	-
NONRATT000490.2	1:82230930-82234051	3122	0.0655008	0.0691418	0.0635532	0.0695657	29.1945	20.5018	0.0660653	16.5886	7.97209	4.55986e-08	4.09878e-05	UP	trans	ENSRNOG00000060320	Lin28a	Protein Lin28a; RCG30757 [Source:UniProtKB/TrEMBL;Acc:D3ZZA6]	5:152230343-152247332	0.0667565	0.0234749	0	0	0	0.0487219	0.0300771	0.0162406	-0.889059	0.709088	1	-
NONRATT000490.2	1:82230930-82234051	3122	0.0655008	0.0691418	0.0635532	0.0695657	29.1945	20.5018	0.0660653	16.5886	7.97209	4.55986e-08	4.09878e-05	UP	trans	ENSRNOG00000042427	Gskip	GSK3B interacting protein [Source:RGD Symbol;Acc:1308470]	6:129519709-129536221	13.1659	11.9213	12.8465	12.7181	13.0193	12.4165	12.6445	12.718	0.00835538	0.9268	1	-
NONRATT000490.2	1:82230930-82234051	3122	0.0655008	0.0691418	0.0635532	0.0695657	29.1945	20.5018	0.0660653	16.5886	7.97209	4.55986e-08	4.09878e-05	UP	trans	ENSRNOG00000021719	Slfn5	schlafen family member 5 [Source:RGD Symbol;Acc:1312025]	10:70298519-70312070	7.04168	7.51236	6.60188	5.75358	5.71308	4.98788	7.05197	5.48485	-0.362575	0.000151012	0.0123918	-
NONRATT000490.2	1:82230930-82234051	3122	0.0655008	0.0691418	0.0635532	0.0695657	29.1945	20.5018	0.0660653	16.5886	7.97209	4.55986e-08	4.09878e-05	UP	trans	ENSRNOG00000011820	Acpp	acid phosphatase, prostate [Source:RGD Symbol;Acc:2023]	8:112834707-112884077	0.148196	0.170464	0.0522874	0.114934	0.168151	0.132725	0.123649	0.138603	0.164708	0.81647	1	-
NONRATT000490.2	1:82230930-82234051	3122	0.0655008	0.0691418	0.0635532	0.0695657	29.1945	20.5018	0.0660653	16.5886	7.97209	4.55986e-08	4.09878e-05	UP	trans	ENSRNOG00000013610	Chrna5	cholinergic receptor, nicotinic, alpha 5 (neuronal) [Source:RGD Symbol;Acc:2347]	8:59561817-59590172	4.73438	4.09425	6.2301	7.44621	4.61273	1.28636	5.01957	4.44843	-0.174267	0.658087	1	-
NONRATT000490.2	1:82230930-82234051	3122	0.0655008	0.0691418	0.0635532	0.0695657	29.1945	20.5018	0.0660653	16.5886	7.97209	4.55986e-08	4.09878e-05	UP	trans	ENSRNOG00000039829	Rpp14	ribonuclease P/MRP 14 subunit [Source:RGD Symbol;Acc:1305436]	15:18625964-18632536	9.49409	11.724	10.74	10.9369	11.1533	10.3932	10.6527	10.8278	0.0235252	0.848917	1	-
NONRATT000490.2	1:82230930-82234051	3122	0.0655008	0.0691418	0.0635532	0.0695657	29.1945	20.5018	0.0660653	16.5886	7.97209	4.55986e-08	4.09878e-05	UP	trans	ENSRNOG00000027091	Kctd18	potassium channel tetramerization domain containing 18 [Source:RGD Symbol;Acc:1564820]	9:64852301-64916652	5.03142	5.86523	4.47009	4.77105	5.65049	5.17366	5.12224	5.1984	0.0212909	0.849128	1	-
NONRATT000490.2	1:82230930-82234051	3122	0.0655008	0.0691418	0.0635532	0.0695657	29.1945	20.5018	0.0660653	16.5886	7.97209	4.55986e-08	4.09878e-05	UP	trans	ENSRNOG00000055408	Gcat	glycine C-acetyltransferase [Source:RGD Symbol;Acc:1307291]	7:120263054-120269451	3.39087	3.20737	2.90324	3.45657	3.17432	3.38444	3.16716	3.33844	0.0759839	0.707225	1	-
NONRATT000490.2	1:82230930-82234051	3122	0.0655008	0.0691418	0.0635532	0.0695657	29.1945	20.5018	0.0660653	16.5886	7.97209	4.55986e-08	4.09878e-05	UP	trans	ENSRNOG00000052061	Ppef2	protein phosphatase, EF hand calcium-binding domain 2 [Source:RGD Symbol;Acc:1307093]	14:17306825-17333588	1.9407	2.19046	1.51186	1.48663	2.08118	2.48355	1.88101	2.01712	0.100793	0.688321	1	-
NONRATT000490.2	1:82230930-82234051	3122	0.0655008	0.0691418	0.0635532	0.0695657	29.1945	20.5018	0.0660653	16.5886	7.97209	4.55986e-08	4.09878e-05	UP	trans	ENSRNOG00000049137	Zfp35	zinc finger protein 35 [Source:RGD Symbol;Acc:1312031]	18:15883182-15898821	4.87088	5.13602	4.97377	4.76293	4.58322	5.00403	4.99356	4.78339	-0.0620331	0.597639	1	-
NONRATT000490.2	1:82230930-82234051	3122	0.0655008	0.0691418	0.0635532	0.0695657	29.1945	20.5018	0.0660653	16.5886	7.97209	4.55986e-08	4.09878e-05	UP	trans	ENSRNOG00000008022	Apaf1	apoptotic peptidase activating factor 1 [Source:RGD Symbol;Acc:620575]	7:31699885-31784192	4.34145	5.05181	4.87337	4.69834	4.40891	4.71041	4.75554	4.60589	-0.0461307	0.70165	1	-
NONRATT000490.2	1:82230930-82234051	3122	0.0655008	0.0691418	0.0635532	0.0695657	29.1945	20.5018	0.0660653	16.5886	7.97209	4.55986e-08	4.09878e-05	UP	trans	ENSRNOG00000036699	RGD1306926	similar to hypothetical protein FLJ22175 [Source:RGD Symbol;Acc:1306926]	10:109539548-109551362	4.08478	4.22882	4.15111	4.46704	3.912	3.60981	4.15491	3.99628	-0.0561578	0.667995	1	-
NONRATT000490.2	1:82230930-82234051	3122	0.0655008	0.0691418	0.0635532	0.0695657	29.1945	20.5018	0.0660653	16.5886	7.97209	4.55986e-08	4.09878e-05	UP	trans	ENSRNOG00000036866	Acer3	alkaline ceramidase 3 [Source:RGD Symbol;Acc:1561254]	1:163160979-163263606	16.6519	15.625	15.8679	14.2464	14.1756	14.747	16.0483	14.3897	-0.157384	0.0574496	0.502265	-
NONRATT000490.2	1:82230930-82234051	3122	0.0655008	0.0691418	0.0635532	0.0695657	29.1945	20.5018	0.0660653	16.5886	7.97209	4.55986e-08	4.09878e-05	UP	trans	ENSRNOG00000005491	Best3	bestrophin 3 [Source:RGD Symbol;Acc:1305439]	7:60015998-60057152	0.634525	0.250906	0.333515	1.07141	0.825038	0.607792	0.406315	0.834747	1.03874	0.00489818	0.136817	-
NONRATT000490.2	1:82230930-82234051	3122	0.0655008	0.0691418	0.0635532	0.0695657	29.1945	20.5018	0.0660653	16.5886	7.97209	4.55986e-08	4.09878e-05	UP	trans	ENSRNOG00000010071	RGD1560010	RGD1560010 [Source:RGD Symbol;Acc:1560010]	2:178389799-178393113	1.45671	1.10934	1.76692	1.89871	1.06063	1.06311	1.44432	1.34082	-0.107281	0.760176	1	-
NONRATT000490.2	1:82230930-82234051	3122	0.0655008	0.0691418	0.0635532	0.0695657	29.1945	20.5018	0.0660653	16.5886	7.97209	4.55986e-08	4.09878e-05	UP	trans	ENSRNOG00000007629	Sf3a3	splicing factor 3a, subunit 3 [Source:RGD Symbol;Acc:1308726]	5:142702685-142722341	12.8863	13.9107	13.0244	11.2933	12.9951	12.5424	13.2738	12.2769	-0.112636	0.261197	0.866649	-
NONRATT000490.2	1:82230930-82234051	3122	0.0655008	0.0691418	0.0635532	0.0695657	29.1945	20.5018	0.0660653	16.5886	7.97209	4.55986e-08	4.09878e-05	UP	trans	ENSRNOG00000001427	Orai2	ORAI calcium release-activated calcium modulator 2 [Source:RGD Symbol;Acc:1310213]	12:23544287-23564569	10.7367	12.9104	9.35318	13.5336	9.73169	16.6219	11.0001	13.2957	0.273446	0.0890099	0.611626	-
NONRATT000490.2	1:82230930-82234051	3122	0.0655008	0.0691418	0.0635532	0.0695657	29.1945	20.5018	0.0660653	16.5886	7.97209	4.55986e-08	4.09878e-05	UP	trans	ENSRNOG00000025360	Exd1	exonuclease 3'-5' domain containing 1 [Source:RGD Symbol;Acc:1561009]	3:111326480-111354419	0.433322	0.456891	0.46474	0.340487	0.313122	0.29959	0.451651	0.317733	-0.507393	0.138253	0.719122	-
NONRATT000490.2	1:82230930-82234051	3122	0.0655008	0.0691418	0.0635532	0.0695657	29.1945	20.5018	0.0660653	16.5886	7.97209	4.55986e-08	4.09878e-05	UP	trans	ENSRNOG00000029466	RGD1562608	similar to KIAA1328 protein [Source:RGD Symbol;Acc:1562608]	18:17403407-17676049	5.54474	4.75035	6.35189	6.01574	5.71935	5.90123	5.549	5.87877	0.0832887	0.495929	0.985627	-
NONRATT000490.2	1:82230930-82234051	3122	0.0655008	0.0691418	0.0635532	0.0695657	29.1945	20.5018	0.0660653	16.5886	7.97209	4.55986e-08	4.09878e-05	UP	trans	ENSRNOG00000017975	Dnajb13	DnaJ (Hsp40) homolog, subfamily B, member 13 [Source:RGD Symbol;Acc:1359131]	1:165515726-165530095	0.382495	0.439968	0.539849	0.185389	0.347198	0.304523	0.454104	0.279036	-0.702569	0.127658	0.704958	-
NONRATT000490.2	1:82230930-82234051	3122	0.0655008	0.0691418	0.0635532	0.0695657	29.1945	20.5018	0.0660653	16.5886	7.97209	4.55986e-08	4.09878e-05	UP	trans	ENSRNOG00000019830	Hsd17b1	hydroxysteroid (17-beta) dehydrogenase 1 [Source:RGD Symbol;Acc:2836]	10:88987558-88989757	0.441027	0.406935	0.534978	0.47033	0.412862	0.784577	0.46098	0.555923	0.270181	0.612503	1	-
NONRATT000490.2	1:82230930-82234051	3122	0.0655008	0.0691418	0.0635532	0.0695657	29.1945	20.5018	0.0660653	16.5886	7.97209	4.55986e-08	4.09878e-05	UP	trans	ENSRNOG00000018330	Fam83f	family with sequence similarity 83, member F [Source:RGD Symbol;Acc:1562089]	7:121889157-121918772	0.767519	0.485588	0.546165	0.572973	0.415132	0.840198	0.599757	0.609434	0.023092	1	1	-
NONRATT000490.2	1:82230930-82234051	3122	0.0655008	0.0691418	0.0635532	0.0695657	29.1945	20.5018	0.0660653	16.5886	7.97209	4.55986e-08	4.09878e-05	UP	trans	ENSRNOG00000000417	Numa1	nuclear mitotic apparatus protein 1 [Source:RGD Symbol;Acc:1308777]	1:167051209-167091453	25.4276	25.7331	24.5977	26.2881	25.7346	25.1113	25.2528	25.7113	0.0259608	0.663994	1	-
NONRATT000490.2	1:82230930-82234051	3122	0.0655008	0.0691418	0.0635532	0.0695657	29.1945	20.5018	0.0660653	16.5886	7.97209	4.55986e-08	4.09878e-05	UP	trans	ENSRNOG00000001161	Gatc	glutamyl-tRNA(Gln) amidotransferase, subunit C [Source:RGD Symbol;Acc:1309698]	12:46989951-47039542	11.9534	10.2778	12.8447	10.5659	12.1163	11.3729	11.6919	11.3517	-0.0426089	0.747378	1	-
NONRATT000490.2	1:82230930-82234051	3122	0.0655008	0.0691418	0.0635532	0.0695657	29.1945	20.5018	0.0660653	16.5886	7.97209	4.55986e-08	4.09878e-05	UP	trans	ENSRNOG00000005193	Pfas	phosphoribosylformylglycinamidine synthase [Source:RGD Symbol;Acc:1304926]	10:55571118-55589978	9.72777	9.6219	10.4326	11.1799	11.1512	11.0155	9.92744	11.1155	0.163081	0.0283876	0.364304	-
NONRATT000490.2	1:82230930-82234051	3122	0.0655008	0.0691418	0.0635532	0.0695657	29.1945	20.5018	0.0660653	16.5886	7.97209	4.55986e-08	4.09878e-05	UP	trans	ENSRNOG00000050828	Vkorc1	vitamin K epoxide reductase complex, subunit 1 [Source:RGD Symbol;Acc:1303107]	1:199337138-199341302	4.20434	3.60197	4.07973	3.74804	4.26384	4.02718	3.96201	4.01302	0.0184545	0.913292	1	-
NONRATT000490.2	1:82230930-82234051	3122	0.0655008	0.0691418	0.0635532	0.0695657	29.1945	20.5018	0.0660653	16.5886	7.97209	4.55986e-08	4.09878e-05	UP	trans	ENSRNOG00000011071	Nt5e	5' nucleotidase, ecto [Source:RGD Symbol;Acc:61956]	8:95968652-96012696	7.28731	6.68404	8.96028	10.8055	8.62871	11.8296	7.64388	10.4213	0.447152	0.001417	0.0596227	-
NONRATT000490.2	1:82230930-82234051	3122	0.0655008	0.0691418	0.0635532	0.0695657	29.1945	20.5018	0.0660653	16.5886	7.97209	4.55986e-08	4.09878e-05	UP	trans	ENSRNOG00000018144	Depdc5	DEP domain containing 5 [Source:RGD Symbol;Acc:1311535]	14:83089000-83219464	11.3777	11.5172	11.9654	12.2709	12.3687	11.3366	11.6201	11.9921	0.0454581	0.513014	0.985627	-
NONRATT000490.2	1:82230930-82234051	3122	0.0655008	0.0691418	0.0635532	0.0695657	29.1945	20.5018	0.0660653	16.5886	7.97209	4.55986e-08	4.09878e-05	UP	trans	ENSRNOG00000002255	Fam162a	family with sequence similarity 162, member A [Source:RGD Symbol;Acc:1590883]	11:67618625-67646253	18.7371	19.9922	17.316	18.1739	18.7099	18.1185	18.6818	18.3341	-0.0270997	0.822931	1	-
NONRATT000490.2	1:82230930-82234051	3122	0.0655008	0.0691418	0.0635532	0.0695657	29.1945	20.5018	0.0660653	16.5886	7.97209	4.55986e-08	4.09878e-05	UP	trans	ENSRNOG00000006462	Ero1l	ERO1-like (S. cerevisiae) [Source:RGD Symbol;Acc:621713]	15:19619973-19655381	54.498	53.7115	54.3166	58.4765	54.2346	58.2622	54.1754	56.9911	0.0730999	0.284518	0.888216	-
NONRATT000490.2	1:82230930-82234051	3122	0.0655008	0.0691418	0.0635532	0.0695657	29.1945	20.5018	0.0660653	16.5886	7.97209	4.55986e-08	4.09878e-05	UP	trans	ENSRNOG00000019044	Adam30	ADAM metallopeptidase domain 30 [Source:RGD Symbol;Acc:1594713]	2:200328498-200331938	0.022763	0.0240138	0	0.0971263	0.0568321	0	0.0155923	0.0513194	1.71867	0.319252	0.90891	-
NONRATT000490.2	1:82230930-82234051	3122	0.0655008	0.0691418	0.0635532	0.0695657	29.1945	20.5018	0.0660653	16.5886	7.97209	4.55986e-08	4.09878e-05	UP	trans	ENSRNOG00000052023	AABR07002885.1	-	1:88374496-88387424	0.0692348	0.219044	0.223985	0.3446	0.115238	0.17687	0.170754	0.212236	0.313746	0.635619	1	-
NONRATT000490.2	1:82230930-82234051	3122	0.0655008	0.0691418	0.0635532	0.0695657	29.1945	20.5018	0.0660653	16.5886	7.97209	4.55986e-08	4.09878e-05	UP	trans	ENSRNOG00000025222	Pcid2	PCI domain containing 2 [Source:RGD Symbol;Acc:1307041]	16:81757582-81783047	16.8673	17.4012	17.8467	16.3976	17.3723	18.9001	17.3717	17.5567	0.0152772	0.848243	1	-
NONRATT000490.2	1:82230930-82234051	3122	0.0655008	0.0691418	0.0635532	0.0695657	29.1945	20.5018	0.0660653	16.5886	7.97209	4.55986e-08	4.09878e-05	UP	trans	ENSRNOG00000052506	Ak3	adenylate kinase 3 [Source:RGD Symbol;Acc:619885]	1:247144491-247169693	27.4	26.386	26.0115	25.34	28.2686	24.3047	26.5992	25.9711	-0.034473	0.770267	1	-
NONRATT000490.2	1:82230930-82234051	3122	0.0655008	0.0691418	0.0635532	0.0695657	29.1945	20.5018	0.0660653	16.5886	7.97209	4.55986e-08	4.09878e-05	UP	trans	ENSRNOG00000025736	Tcf23	transcription factor 23 [Source:RGD Symbol;Acc:1586500]	6:26762761-26771164	0.122241	0.110482	0.0677778	0.0931076	0.0871864	0.0955852	0.100167	0.0919597	-0.123332	1	1	-
NONRATT000490.2	1:82230930-82234051	3122	0.0655008	0.0691418	0.0635532	0.0695657	29.1945	20.5018	0.0660653	16.5886	7.97209	4.55986e-08	4.09878e-05	UP	trans	ENSRNOG00000039859	Dnmt1	DNA (cytosine-5-)-methyltransferase 1 [Source:RGD Symbol;Acc:620979]	8:21922515-21968495	8.43486	8.64695	9.02611	8.24561	8.68584	8.33594	8.70264	8.42246	-0.0472107	0.590708	1	-
NONRATT000490.2	1:82230930-82234051	3122	0.0655008	0.0691418	0.0635532	0.0695657	29.1945	20.5018	0.0660653	16.5886	7.97209	4.55986e-08	4.09878e-05	UP	trans	ENSRNOG00000003261	Usp9x	ubiquitin specific peptidase 9, X-linked [Source:RGD Symbol;Acc:1560056]	X:10510033-10630297	72.1382	70.374	71.0702	71.3707	70.7492	71.1131	71.1942	71.0777	-0.00236248	0.98844	1	-
NONRATT000490.2	1:82230930-82234051	3122	0.0655008	0.0691418	0.0635532	0.0695657	29.1945	20.5018	0.0660653	16.5886	7.97209	4.55986e-08	4.09878e-05	UP	trans	ENSRNOG00000019630	Hacl1	2-hydroxyacyl-CoA lyase 1 [Source:RGD Symbol;Acc:619849]	16:7714465-7758189	4.34244	3.69991	4.43553	3.91406	4.69862	4.70954	4.1593	4.44074	0.0944606	0.431382	0.976985	-
NONRATT000490.2	1:82230930-82234051	3122	0.0655008	0.0691418	0.0635532	0.0695657	29.1945	20.5018	0.0660653	16.5886	7.97209	4.55986e-08	4.09878e-05	UP	trans	ENSRNOG00000001187	Oasl	2'-5'-oligoadenylate synthetase-like [Source:RGD Symbol;Acc:1308586]	12:47444104-47456894	0.228057	0.0601093	0.221289	0.030405	0.142328	0.468117	0.169818	0.213617	0.331033	0.75242	1	-
NONRATT024648.2	6:133778660-133800903	455	0	0	0	26.7347	27.4947	23.064	0	25.7644	Inf	2.27889e-27	1.0652e-23	UP	cis	ENSRNOG00000058971	SNORD113	Small nucleolar RNA SNORD113/SNORD114 family [Source:RFAM;Acc:RF00181]	6:133778119-133778199	22.2441	23.4551	28.1548	28.8794	21.7288	25.4097	24.618	25.3393	0.0416631	0.886038	1	-
NONRATT019532.2	3:94702639-94704697	2059	0.43034	0.489312	0.160617	6.22433	0.413314	4.87982	0.36009	3.83916	3.41436	3.81848e-05	0.0102577	UP	cis	ENSRNOG00000037514	Qser1	glutamine and serine rich 1 [Source:RGD Symbol;Acc:1311804]	3:94702663-94767239	10.1415	9.96177	10.2282	10.5099	9.92975	9.82935	10.1105	10.0897	-0.00297493	1	1	-
NONRATT021436.2	4:84678970-84680975	2006	0.101941	0.645752	0.329722	0.794093	0.848469	111.973	0.359138	37.872	6.72045	2.64628e-05	0.00754223	UP	cis	ENSRNOG00000009571	Wipf3	WAS/WASL interacting protein family, member 3 [Source:RGD Symbol;Acc:708559]	4:84597323-84676775	7.1096	6.1272	6.23647	8.50522	8.18829	6.70751	6.49109	7.80034	0.265076	0.0202919	0.306564	-
NONRATT029038.2	8:119821037-119828852	1165	0.877596	0.741275	0	0	0	0	0.539624	0	#NAME?	0.000183955	0.0320425	DOWN	cis	ENSRNOG00000008865	Stac	SH3 and cysteine rich domain [Source:RGD Symbol;Acc:1305745]	8:119821901-119889661	0.851529	1.19718	0.963999	0.908108	0.708548	1.00986	1.00424	0.875505	-0.197913	0.678213	1	-
NONRATT010417.2	15:33617845-33618376	532	0.384386	10.8218	12.9295	0.272206	0.479895	0.279839	8.04523	0.34398	-4.54774	5.26047e-06	0.00201435	DOWN	trans	ENSRNOG00000046276	Myh3	myosin, heavy chain 3, skeletal muscle, embryonic [Source:RGD Symbol;Acc:3138]	10:53621375-53645194	0.0129789	0	0	0.0276894	0.0486062	0.0142159	0.0043263	0.0301705	2.80194	0.13383	0.713397	-
NONRATT010417.2	15:33617845-33618376	532	0.384386	10.8218	12.9295	0.272206	0.479895	0.279839	8.04523	0.34398	-4.54774	5.26047e-06	0.00201435	DOWN	cis	ENSRNOG00000048644	AC115371.1	Uncharacterized protein [Source:UniProtKB/TrEMBL;Acc:F1M538]	15:33606124-33611579	4.97389	5.24457	7.06738	7.57754	5.765	9.5287	5.76195	7.62375	0.403944	0.132584	0.713397	-
NONRATT010417.2	15:33617845-33618376	532	0.384386	10.8218	12.9295	0.272206	0.479895	0.279839	8.04523	0.34398	-4.54774	5.26047e-06	0.00201435	DOWN	trans	ENSRNOG00000016983	Myh7	myosin, heavy chain 7, cardiac muscle, beta [Source:RGD Symbol;Acc:62030]	15:33634422-33656089	0.119032	0.111566	0.0385069	0.126944	0.0495254	0.173745	0.0897016	0.116738	0.380072	0.531549	0.985627	-
NONRATT010417.2	15:33617845-33618376	532	0.384386	10.8218	12.9295	0.272206	0.479895	0.279839	8.04523	0.34398	-4.54774	5.26047e-06	0.00201435	DOWN	trans	ENSRNOG00000049695	Myh1	myosin, heavy chain 1, skeletal muscle, adult [Source:RGD Symbol;Acc:735061]	10:53713938-53848347	0.0531089	0.0560012	0.0277497	0.00871432	0	0.00447399	0.0456199	0.0043961	-3.37537	3.84272e-06	0.00068474	DOWN
NONRATT010417.2	15:33617845-33618376	532	0.384386	10.8218	12.9295	0.272206	0.479895	0.279839	8.04523	0.34398	-4.54774	5.26047e-06	0.00201435	DOWN	trans	ENSRNOG00000025757	Myh6	myosin, heavy chain 6, cardiac muscle, alpha [Source:RGD Symbol;Acc:62029]	15:33605654-33629699	0.012994	0	0.0126163	0.0554432	0	0.0284507	0.00853674	0.0279646	1.71185	0.318499	0.908388	-
NONRATT021357.2	4:67242257-67243046	790	9.66322	0.910985	3.51627	0.733234	0.215447	0.188449	4.69682	0.379043	-3.63125	1.04755e-05	0.00365408	DOWN	cis	ENSRNOG00000026748	Dennd2a	DENN/MADD domain containing 2A [Source:RGD Symbol;Acc:1306142]	4:67242271-67301102	15.9188	15.4809	15.1646	14.2213	15.1464	15.9725	15.5214	15.1134	-0.0384344	0.681229	1	-
NONRATT004982.2	10:94252070-94254046	1977	37.5107	38.5489	0.133803	0.109855	0.172183	0.112955	25.3978	0.131664	-7.59169	5.40808e-08	4.68119e-05	DOWN	cis	ENSRNOG00000008405	Taco1	translational activator of mitochondrially encoded cytochrome c oxidase I [Source:RGD Symbol;Acc:1306784]	10:94260197-94268222	11.5556	11.4163	11.5162	10.2139	12.3445	11.2254	11.496	11.2613	-0.029767	0.83524	1	-
NONRATT023334.2	5:92862229-92865113	2885	60.2931	2.74391	2.29253	1.35528	1.50442	1.54786	21.7765	1.46919	-3.88968	0.000136435	0.0263522	DOWN	cis	ENSRNOG00000005711	Ptprd	protein tyrosine phosphatase, receptor type, D [Source:RGD Symbol;Acc:1561090]	5:92862267-93244202	81.0534	75.8689	76.4735	72.4731	84.4027	86.0557	77.7986	80.9772	0.0577706	0.443276	0.985223	-
NONRATT025255.2	6:115320465-115324150	3686	0.628718	0.605241	0.251207	9.97896	3.85572	4.01814	0.495056	5.95094	3.58746	2.25757e-09	2.9312e-06	UP	cis	ENSRNOG00000004300	Gtf2a1	general transcription factor IIA, 1 [Source:RGD Symbol;Acc:69246]	6:115320467-115352681	14.0388	12.5039	12.2168	13.9363	12.7824	13.9516	12.9198	13.5568	0.0694237	0.40391	0.962861	-
NONRATT028419.2	8:39380394-39404744	386	2.82529	2.42368	1.71353	0.562653	0.44094	0.385686	2.32083	0.463093	-2.32527	0.000169078	0.0308713	DOWN	cis	ENSRNOG00000028856	Pknox2	PBX/knotted 1 homeobox 2 [Source:RGD Symbol;Acc:1590611]	8:39361218-39551700	4.75432	4.13634	4.36662	4.22514	4.24925	4.49778	4.4191	4.32405	-0.0313671	0.786199	1	-
NONRATT029471.2	9:74014582-74017583	3002	2.86084	33.2498	7.00611	1.08537	2.80653	1.43794	14.3722	1.77661	-3.01608	0.000133658	0.0263277	DOWN	cis	ENSRNOG00000013557	Lancl1	LanC lantibiotic synthetase component C-like 1 (bacterial) [Source:RGD Symbol;Acc:69416]	9:74014656-74048244	49.1704	46.3239	50.3663	50.4419	47.1844	52.2831	48.6202	49.9698	0.0395022	0.55226	0.996223	-
NONRATT006049.2	10:89331667-89338192	1177	0.0579137	0.061133	0.280978	0.98429	1.15686	0.44264	0.133342	0.861263	2.69133	0.000153905	0.0283222	UP	cis	ENSRNOG00000020658	Aarsd1	alanyl-tRNA synthetase domain containing 1 [Source:RGD Symbol;Acc:1561650]	10:89317975-89331078	12.4204	11.5719	11.5923	12.285	12.1302	13.2593	11.8616	12.5582	0.0823341	0.357981	0.942197	-
NONRATT006049.2	10:89331667-89338192	1177	0.0579137	0.061133	0.280978	0.98429	1.15686	0.44264	0.133342	0.861263	2.69133	0.000153905	0.0283222	UP	trans	ENSRNOG00000024178	Cenpt	centromere protein T [Source:RGD Symbol;Acc:1309383]	19:37812751-37819789	0.104021	0.0365788	0.100963	0	0.173138	0.075919	0.080521	0.0830189	0.0440754	1	1	-
MSTRG.3747.3	10:8610166-8613930	3726	0	0	2.96438	0	0	0	0.988128	0	#NAME?	0.000299178	0.0445355	DOWN	cis	ENSRNOG00000002827	Rbfox1	RNA binding protein, fox-1 homolog (C. elegans) 1 [Source:RGD Symbol;Acc:1311210]	10:8312961-8654892	26.5908	30.8827	21.9136	30.6587	22.7041	29.7671	26.4624	27.71	0.0664624	0.586032	1	-
NONRATT002918.2	1:154147099-154165450	839	2.03104	2.74478	2.04959	0.345205	0.50716	0.887126	2.27514	0.579831	-1.97225	6.71125e-05	0.0158433	DOWN	cis	ENSRNOG00000017383	l7Rn6	lethal, Chr 7, Rinchik 6 [Source:RGD Symbol;Acc:1359455]	1:154142836-154170409	15.8777	16.3269	15.6194	15.8596	16.1604	17.4292	15.9413	16.4831	0.0482159	0.616712	1	-
NONRATT000761.2	1:116676698-116677607	910	0.224718	24.0412	27.8367	0.238664	0.187036	0.245398	17.3675	0.223699	-6.27869	2.09779e-07	0.000125711	DOWN	cis	ENSRNOG00000015734	Ube3a	ubiquitin protein ligase E3A [Source:RGD Symbol;Acc:1306361]	1:116587815-116679973	41.2927	40.0562	42.8998	42.0399	39.9891	40.1587	41.4162	40.7292	-0.024132	0.757624	1	-
MSTRG.12068.1	17:89375298-89445712	815	0.669099	0	1.05501	12.6156	9.60675	4.20073	0.574704	8.80769	3.93787	6.43634e-08	5.06871e-05	UP	cis	ENSRNOG00000028913	LOC688970	similar to serine/threonine kinase [Source:RGD Symbol;Acc:1582937]	17:89452814-89454038	0	0	0	0	0.208263	0	0	0.0694211	Inf	0.522599	0.985627	-
MSTRG.1948.2	1:162552939-162559528	5323	0	1.39253	4.02577	0	0	0.0139841	1.8061	0.00466136	-8.59791	1.33387e-06	0.000599498	DOWN	cis	ENSRNOG00000024194	Rsf1	remodeling and spacing factor 1 [Source:RGD Symbol;Acc:1311245]	1:162549420-162662170	15.6458	14.7072	14.1193	15.6144	14.8119	14.4295	14.8241	14.9519	0.0123879	0.858169	1	-
NONRATT017723.2	20:20638566-20640785	2220	0.122819	0.0972345	0.119157	1.82648	1.84007	0.167618	0.11307	1.27806	3.49866	1.16899e-05	0.00390292	UP	cis	ENSRNOG00000000633	Rhobtb1	Rho-related BTB domain containing 1 [Source:RGD Symbol;Acc:1306871]	20:20638579-20713128	1.62215	1.96112	2.46968	2.2817	2.25167	1.79108	2.01765	2.10815	0.0633021	0.724747	1	-
NONRATT002035.2	1:31068701-31069048	348	0.195875	0.413526	0.380166	18.1016	27.1449	0.427801	0.329856	15.2248	5.52844	1.22364e-06	0.000560741	UP	cis	ENSRNOG00000012324	Soga3	SOGA family member 3 [Source:RGD Symbol;Acc:1307525]	1:31066798-31122093	25.698	24.3551	25.0438	24.4257	22.65	23.8014	25.0323	23.6257	-0.0834346	0.317192	0.90739	-
ENSRNOT00000076715	13:78997305-78999355	2051	2.19336	0.0350822	2.38629	0.0706064	0.0829853	0.0362932	1.53824	0.0632949	-4.60305	1.10798e-05	0.00377707	DOWN	cis	ENSRNOG00000002890	Ankrd45	ankyrin repeat domain 45 [Source:RGD Symbol;Acc:1311153]	13:78979321-78991997	1.41041	1.21675	0.870912	1.36734	1.44029	0.842067	1.16602	1.21657	0.0612153	0.899791	1	-
MSTRG.18145.2	3:146435386-146436674	1269	4.45809	4.08315	3.02293	0.399379	0.0670618	0	3.85472	0.15548	-4.63182	3.71834e-13	7.24178e-10	DOWN	cis	ENSRNOG00000007102	Acss1	acyl-CoA synthetase short-chain family member 1 [Source:RGD Symbol;Acc:1306246]	3:146420346-146470293	19.0018	19.8064	16.8528	27.5378	19.9643	25.9062	18.5536	24.4694	0.399278	0.000388577	0.0238649	-
MSTRG.16397.11	20:26135962-26147321	10896	2.89632	0	0	0	0	0	0.96544	0	#NAME?	0.00018509	0.0320425	DOWN	cis	ENSRNOG00000026466	Lrrtm3	leucine rich repeat transmembrane neuronal 3 [Source:RGD Symbol;Acc:1304866]	20:25990304-26163656	5.97612	6.08202	7.21242	5.2991	5.45424	5.70381	6.42352	5.48572	-0.227684	0.0175721	0.282525	-
MSTRG.26293.6	8:61678346-61686870	5598	0	1.55552	3.55627	0	0	0	1.70393	0	#NAME?	2.38368e-07	0.000132641	DOWN	cis	ENSRNOG00000017600	Ptpn9	protein tyrosine phosphatase, non-receptor type 9 [Source:RGD Symbol;Acc:628726]	8:61659445-61739434	13.8597	13.8882	14.5565	14.4712	14.631	13.4864	14.1014	14.1962	0.00966521	0.884739	1	-
NONRATT000541.2	1:85437811-85438922	534	2.80815	2.29106	0	0	0	0	1.69973	0	#NAME?	3.87716e-05	0.0102969	DOWN	cis	ENSRNOG00000032034	Supt5h	suppressor of Ty 5 homolog (S. cerevisiae) [Source:RGD Symbol;Acc:1563807]	1:85438105-85466635	59.8863	58.2692	56.8025	67.5896	66.8114	60.7845	58.3193	65.0618	0.157838	0.0243887	0.33682	-
NONRATT021930.2	4:171069769-171176637	1042	0.654104	0.345335	0.253866	0	0	0	0.417769	0	#NAME?	4.98725e-05	0.012533	DOWN	cis	ENSRNOG00000027592	Rerg	RAS-like, estrogen-regulated, growth-inhibitor [Source:RGD Symbol;Acc:1562829]	4:171069191-171176581	4.63776	5.95167	4.50033	5.06087	3.99384	3.93563	5.02992	4.33011	-0.21613	0.238096	0.861921	-
NONRATT011307.2	16:8466973-8468661	661	0.206247	0	0.200148	2.62899	2.18869	2.25193	0.135465	2.35654	4.12068	3.50988e-10	5.12683e-07	UP	cis	ENSRNOG00000019978	Parg	poly (ADP-ribose) glycohydrolase [Source:RGD Symbol;Acc:620387]	16:8350326-8457996	19.6537	18.0422	20.3337	20.0554	19.7581	20.6302	19.3432	20.1479	0.0588011	0.44307	0.985176	-
NONRATT008555.2	13:106681330-106682621	1292	24.9007	0.222822	0.255968	0.22417	0.197604	0.230399	8.45984	0.217391	-5.28227	0.00017352	0.0310667	DOWN	cis	ENSRNOG00000002593	Esrrg	estrogen-related receptor gamma [Source:RGD Symbol;Acc:1303236]	13:106463368-106683436	20.7385	19.4187	20.2665	18.1193	20.7855	19.3397	20.1412	19.4148	-0.0529931	0.529764	0.985627	-
NONRATT031066.2	X:72377628-72379110	1483	0.919232	0.72788	0.401375	12.1572	11.3049	11.1916	0.682829	11.5512	4.08038	2.35035e-15	6.10334e-12	UP	cis	ENSRNOG00000003063	Phka1	phosphorylase kinase, alpha 1 [Source:RGD Symbol;Acc:621522]	X:72377021-72515366	11.8095	12.2321	12.0291	14.1855	10.9653	11.6972	12.0236	12.2827	0.0307617	0.718425	1	-
NONRATT027313.2	7:139454938-139469106	3854	0	0	0	1.97267	0	1.77665	0	1.24977	Inf	1.40926e-07	9.28454e-05	UP	cis	ENSRNOG00000053269	Tmem106c	Transmembrane protein 106C [Source:UniProtKB/Swiss-Prot;Acc:Q5RJK0]	7:139444994-139450589	13.3271	13.7573	15.5403	13.1973	14.6078	14.0988	14.2083	13.968	-0.0246086	0.864645	1	-
NONRATT021671.2	4:131415443-131464514	727	0.281284	0	0.545841	2.29068	2.22411	1.33086	0.275708	1.94855	2.82119	1.11513e-05	0.00377707	UP	cis	ENSRNOG00000009184	Foxp1	forkhead box P1 [Source:RGD Symbol;Acc:1308669]	4:131366744-131694755	13.0133	13.5851	12.7533	12.9112	13.3743	12.2258	13.1172	12.8371	-0.0311469	0.780505	1	-
NONRATT024378.2	6:94611173-94642692	270	0.504922	0.799484	0.734864	4.02247	6.30381	11.3018	0.679756	7.20936	3.40678	1.43016e-07	9.28454e-05	UP	cis	ENSRNOG00000004345	Daam1	dishevelled associated activator of morphogenesis 1 [Source:RGD Symbol;Acc:1305119]	6:94636222-94739026	31.1466	31.8892	30.4095	28.9962	28.3672	32.2078	31.1484	29.8571	-0.0610871	0.450689	0.985627	-
NONRATT027438.2	8:13861289-13871354	1301	0.314363	0	0.0508191	0.0556268	2.68197	4.34775	0.121727	2.36178	4.27815	0.000261079	0.0406778	UP	cis	ENSRNOG00000057682	snoZ40	Small nucleolar RNA Z40 [Source:RFAM;Acc:RF00342]	8:13870489-13870561	6.43896	5.65743	6.24762	8.01077	5.35778	5.87391	6.11467	6.41415	0.0689844	1	1	-
NONRATT027438.2	8:13861289-13871354	1301	0.314363	0	0.0508191	0.0556268	2.68197	4.34775	0.121727	2.36178	4.27815	0.000261079	0.0406778	UP	trans	ENSRNOG00000010999	Cep295	centrosomal protein 295 [Source:RGD Symbol;Acc:1311723]	8:13871213-13909188	3.94744	3.68538	3.45805	3.90272	2.09575	2.23566	3.69695	2.74471	-0.429685	0.0187273	0.292536	-
NONRATT024063.2	6:25100498-25102457	1960	0.452077	0.514027	0.911115	21.057	0.651286	15.227	0.62574	12.3118	4.29833	4.13214e-06	0.00163682	UP	cis	ENSRNOG00000007744	Ehd3	EH-domain containing 3 [Source:RGD Symbol;Acc:621762]	6:25074955-25100977	21.2198	20.7125	20.9218	21.9934	19.2	19.6844	20.9514	20.2926	-0.0460945	0.606245	1	-
NONRATT018597.2	3:122883066-122891284	860	0	0	0	0	0.296865	3.46168	0	1.25285	Inf	0.000219298	0.0353463	UP	cis	ENSRNOG00000007408	Ebf4	early B-cell factor 4 [Source:RGD Symbol;Acc:1588215]	3:122836446-122890663	5.1202	6.52774	7.49785	5.11286	6.15854	6.01272	6.38193	5.76138	-0.147579	0.420286	0.970536	-
MSTRG.17544.5	3:91446455-91453969	7487	0	6.07481	0	0	0	0	2.02494	0	#NAME?	0.000152715	0.0283222	DOWN	cis	ENSRNOG00000004755	Commd9	COMM domain containing 9 [Source:RGD Symbol;Acc:1307706]	3:91463660-91478097	14.725	16.2366	15.9005	18.0491	17.539	17.0041	15.6207	17.5307	0.166429	0.0933714	0.624929	-
NONRATT025089.2	6:92859581-92860142	562	6.18538	2.68904	5.1782	0.773027	1.51426	1.05947	4.68421	1.11559	-2.07	5.67772e-05	0.0138223	DOWN	cis	ENSRNOG00000057934	Tmx1	Protein Tmx1; Thioredoxin domain containing 1 [Source:UniProtKB/TrEMBL;Acc:Q52KJ9]	6:92864123-92874204	49.5961	52.7905	51.4781	55.2102	52.5902	47.1036	51.2882	51.6347	0.00971268	0.879086	1	-
MSTRG.12164.2	18:8277507-8298449	16286	3.51977	0	0.00405966	0.00444372	0	0	1.17461	0.00148124	-9.63116	0.000135181	0.0263277	DOWN	cis	ENSRNOG00000015602	Cdh2	cadherin 2 [Source:RGD Symbol;Acc:69280]	18:8146971-8360684	37.9326	41.9393	41.8191	38.8352	37.454	40.6158	40.5637	38.9683	-0.0578856	0.46646	0.985627	-
NONRATT016159.2	2:57122375-57196522	647	0.948087	0.333633	1.02229	0	0	0	0.768003	0	#NAME?	1.70738e-05	0.00539232	DOWN	cis	ENSRNOG00000013336	Wdr70	WD repeat domain 70 [Source:RGD Symbol;Acc:1309487]	2:56944460-57196568	11.4481	12.1099	11.6073	12.1303	11.9078	11.9699	11.7218	12.0027	0.0341665	0.721725	1	-
NONRATT014386.2	19:56210255-56213296	713	37.5695	30.0781	25.9734	0.507711	0.238714	0.521897	31.207	0.422774	-6.20584	1.66176e-24	6.47282e-21	DOWN	cis	ENSRNOG00000038193	Mc1r	melanocortin 1 receptor [Source:RGD Symbol;Acc:1312046]	19:56216813-56217766	0	0.173145	0	0	0	0	0.057715	0	#NAME?	0.525744	0.985627	-
NONRATT014518.2	19:19899539-19913553	772	0	0	0	3.09506	0	4.33829	0	2.47778	Inf	1.55941e-06	0.000687643	UP	cis	ENSRNOG00000015459	Heatr3	HEAT repeat containing 3 [Source:RGD Symbol;Acc:1308267]	19:19858416-19896421	8.99727	8.70661	9.5835	8.50969	8.02578	9.14037	9.09579	8.55861	-0.0878224	0.42256	0.971943	-
NONRATT028679.2	8:68569530-68571914	1511	0	0	0	1.77301	0	1.52693	0	1.09998	Inf	2.34557e-06	0.000978897	UP	cis	ENSRNOG00000008424	Aagab	alpha- and gamma-adaptin binding protein [Source:RGD Symbol;Acc:621601]	8:68526093-68563018	13.1644	14.8671	15.008	14.6526	13.1992	13.7811	14.3465	13.8776	-0.0479373	0.756125	1	-
MSTRG.7892.2	13:80130913-80136322	5291	5.24311	0	5.26265	0	0	0	3.50192	0	#NAME?	7.15934e-08	5.39745e-05	DOWN	cis	ENSRNOG00000029459	Mir199a2	microRNA 199a-2 [Source:RGD Symbol;Acc:2325378]	13:80125391-80125825	0.180064	0.189958	0	0.192076	0	0	0.12334	0.0640252	-0.945933	1	1	-
MSTRG.12070.1	17:89405949-89467456	1148	1.18748	0	1.84358	12.9297	8.89577	4.21401	1.01035	8.67982	3.10281	0.000224955	0.0360098	UP	cis	ENSRNOG00000028913	LOC688970	similar to serine/threonine kinase [Source:RGD Symbol;Acc:1582937]	17:89452814-89454038	0	0	0	0	0.208263	0	0	0.0694211	Inf	0.522599	0.985627	-
NONRATT023980.2	6:2262820-2280619	677	0	0	0	1.81814	1.25704	0	0	1.02506	Inf	0.000151884	0.0283222	UP	cis	ENSRNOG00000006082	Rmdn2	regulator of microtubule dynamics 2 [Source:RGD Symbol;Acc:1559836]	6:2216623-2280777	4.55282	4.40392	3.68766	4.7349	5.49491	3.95424	4.2148	4.72802	0.165772	0.35993	0.943966	-
NONRATT019503.2	3:89743718-89745546	1829	0	0	0	4.35466	0	0	0	1.45155	Inf	0.000273085	0.0419886	UP	cis	ENSRNOG00000004381	AABR07053065.1	-	3:89745238-89745705	0.167367	0.176563	0.162502	0.357064	0.208931	0.183319	0.16881	0.249771	0.565201	1	1	-
MSTRG.24823.2	7:93128932-93141631	12390	0	0	0	0	6.6214	6.34936	0	4.32359	Inf	3.5236e-08	3.43126e-05	UP	cis	ENSRNOG00000061079	SNORA17	Small nucleolar RNA SNORA17 [Source:RFAM;Acc:RF00560]	7:93146477-93146598	12.8425	14.8953	11.839	13.6958	12.0221	14.0589	13.1923	13.2589	0.00726885	1	1	-
NONRATT005284.2	10:15154003-15155387	700	0	0	0	0.206877	1.09416	0.531589	0	0.610876	Inf	0.000228294	0.0360505	UP	cis	ENSRNOG00000019692	Metrn	meteorin, glial cell differentiation regulator [Source:RGD Symbol;Acc:1306222]	10:15164439-15166457	19.2455	22.9751	24.6809	17.7213	19.26	21.8106	22.3005	19.5973	-0.186421	0.182676	0.793311	-
NONRATT007879.2	12:24505979-24506410	432	0.157788	0.166559	0.153045	43.5778	0.196994	0.172309	0.159131	14.6491	6.52445	0.000153223	0.0283222	UP	cis	ENSRNOG00000001453	Baz1b	bromodomain adjacent to zinc finger domain, 1B [Source:RGD Symbol;Acc:1597089]	12:24478898-24537313	26.0594	25.1206	25.9435	27.8395	26.989	26.4314	25.7079	27.0866	0.0753716	0.245665	0.866649	-
NONRATT025796.2	7:54233227-54237880	2301	21.8019	0	0	0	0	0	7.26729	0	#NAME?	0.000146404	0.0278179	DOWN	cis	ENSRNOG00000004019	Phlda1	pleckstrin homology-like domain, family A, member 1 [Source:RGD Symbol;Acc:3836]	7:54247460-54249664	8.34862	8.39259	7.68147	7.42707	7.01913	6.20332	8.14089	6.88317	-0.242114	0.0812438	0.590695	-
MSTRG.14331.2	2:83401910-83429564	27620	0	0	0	0	3.10893	3.84527	0	2.31807	Inf	3.03447e-08	3.22357e-05	UP	cis	ENSRNOG00000010649	Ctnnd2	catenin (cadherin-associated protein), delta 2 [Source:RGD Symbol;Acc:620734]	2:83393282-84094315	51.7544	55.9031	53.5371	56.7546	53.9658	57.0243	53.7315	55.9149	0.0574635	0.372996	0.951791	-
NONRATT000382.2	1:78388540-78390911	2372	1.06322	0.515778	9.64765	0.0305103	0.28702	0.21964	3.74222	0.179057	-4.3854	2.14748e-05	0.00651803	DOWN	cis	ENSRNOG00000015229	Zc3h4	zinc finger CCCH-type containing 4 [Source:RGD Symbol;Acc:1596943]	1:78354934-78390907	11.2412	11.4415	11.6397	11.5573	10.9393	11.8342	11.4408	11.4436	0.000353413	0.964337	1	-
NONRATT022629.2	5:144871528-144872271	744	23.9112	0.193423	20.9797	0.194642	0.228767	0.2001	15.0281	0.207837	-6.17607	3.52229e-07	0.000182932	DOWN	cis	ENSRNOG00000058210	SNORA17	Small nucleolar RNA SNORA17 [Source:RFAM;Acc:RF00560]	5:144877351-144877475	1.25324	2.64355	1.2162	1.33685	0	1.37201	1.70433	0.902951	-0.916485	0.405867	0.963023	-
NONRATT025209.2	6:108129442-108145865	1061	1.2206	0.542601	0	0	0	0	0.587734	0	#NAME?	0.000278155	0.0424886	DOWN	cis	ENSRNOG00000033206	Entpd5	ectonucleoside triphosphate diphosphohydrolase 5 [Source:RGD Symbol;Acc:735219]	6:108087418-108120579	13.9957	14.0845	15.6959	12.5016	16.2257	14.2475	14.5921	14.3249	-0.0266583	0.81779	1	-
NONRATT007029.2	11:67650857-67654378	3522	1.99334	2.20678	2.2347	10.7109	10.4868	9.38253	2.14494	10.1934	2.24863	2.30336e-07	0.000131297	UP	trans	ENSRNOG00000045524	Slc39a3	solute carrier family 39 (zinc transporter), member 3 [Source:RGD Symbol;Acc:1310863]	7:11545024-11553370	7.86347	6.2632	7.71249	7.98009	7.51963	6.78008	7.27972	7.4266	0.028819	0.805159	1	-
NONRATT007029.2	11:67650857-67654378	3522	1.99334	2.20678	2.2347	10.7109	10.4868	9.38253	2.14494	10.1934	2.24863	2.30336e-07	0.000131297	UP	trans	ENSRNOG00000042201	Efcab2	EF-hand calcium binding domain 2 [Source:RGD Symbol;Acc:1308593]	13:96303703-96414404	1.98926	1.77293	1.83839	1.7931	1.53707	2.43689	1.86686	1.92235	0.0422613	0.826364	1	-
NONRATT007029.2	11:67650857-67654378	3522	1.99334	2.20678	2.2347	10.7109	10.4868	9.38253	2.14494	10.1934	2.24863	2.30336e-07	0.000131297	UP	trans	ENSRNOG00000008065	Wwc1	WW and C2 domain containing 1 [Source:RGD Symbol;Acc:1308329]	10:20663541-20818128	23.1247	23.2384	23.1626	20.3237	22.2726	22.1445	23.1753	21.5803	-0.102871	0.203976	0.820385	-
NONRATT007029.2	11:67650857-67654378	3522	1.99334	2.20678	2.2347	10.7109	10.4868	9.38253	2.14494	10.1934	2.24863	2.30336e-07	0.000131297	UP	trans	ENSRNOG00000007262	Ccdc134	coiled-coil domain containing 134 [Source:RGD Symbol;Acc:1559657]	7:123364312-123376221	3.75217	4.38412	5.31381	6.16431	5.25301	6.27224	4.48337	5.89652	0.395281	0.0273277	0.358853	-
NONRATT007029.2	11:67650857-67654378	3522	1.99334	2.20678	2.2347	10.7109	10.4868	9.38253	2.14494	10.1934	2.24863	2.30336e-07	0.000131297	UP	trans	ENSRNOG00000009826	Bche	butyrylcholinesterase [Source:RGD Symbol;Acc:619996]	2:171100140-171196395	4.68349	4.21825	4.23699	3.2387	3.53189	4.0856	4.37957	3.61873	-0.275307	0.0236701	0.33293	-
NONRATT007029.2	11:67650857-67654378	3522	1.99334	2.20678	2.2347	10.7109	10.4868	9.38253	2.14494	10.1934	2.24863	2.30336e-07	0.000131297	UP	trans	ENSRNOG00000033101	Myo18a	myosin XVIIIa [Source:RGD Symbol;Acc:1562698]	10:64979770-65080535	27.8319	29.5368	27.4762	31.8037	32.444	31.7232	28.2816	31.9903	0.17777	0.00721786	0.169727	-
NONRATT007029.2	11:67650857-67654378	3522	1.99334	2.20678	2.2347	10.7109	10.4868	9.38253	2.14494	10.1934	2.24863	2.30336e-07	0.000131297	UP	trans	ENSRNOG00000015787	P3h4	prolyl 3-hydroxylase family member 4 [Source:RGD Symbol;Acc:620767]	10:88318817-88325326	6.56879	4.2007	5.01667	3.92419	5.2383	3.96162	5.26205	4.3747	-0.26644	0.160948	0.757474	-
NONRATT007029.2	11:67650857-67654378	3522	1.99334	2.20678	2.2347	10.7109	10.4868	9.38253	2.14494	10.1934	2.24863	2.30336e-07	0.000131297	UP	trans	ENSRNOG00000037919	Chic1	cysteine-rich hydrophobic domain 1 [Source:RGD Symbol;Acc:1589722]	X:74200972-74244846	7.26577	7.33525	8.58804	6.59441	7.33241	7.02308	7.72968	6.9833	-0.146501	0.286849	0.890804	-
NONRATT007029.2	11:67650857-67654378	3522	1.99334	2.20678	2.2347	10.7109	10.4868	9.38253	2.14494	10.1934	2.24863	2.30336e-07	0.000131297	UP	trans	ENSRNOG00000006925	Zfp786	zinc finger protein 786 [Source:RGD Symbol;Acc:2293500]	4:77495663-77510202	1.93225	2.03743	2.19642	1.92323	1.72273	2.07494	2.05536	1.90697	-0.108114	0.556859	0.996692	-
NONRATT007029.2	11:67650857-67654378	3522	1.99334	2.20678	2.2347	10.7109	10.4868	9.38253	2.14494	10.1934	2.24863	2.30336e-07	0.000131297	UP	trans	ENSRNOG00000016655	Pex6	peroxisomal biogenesis factor 6 [Source:RGD Symbol;Acc:621637]	9:16566688-16581078	3.32091	3.39465	3.54616	3.44874	3.87361	3.79416	3.42057	3.7055	0.115431	0.326443	0.913131	-
NONRATT007029.2	11:67650857-67654378	3522	1.99334	2.20678	2.2347	10.7109	10.4868	9.38253	2.14494	10.1934	2.24863	2.30336e-07	0.000131297	UP	trans	ENSRNOG00000020482	Nfatc4	nuclear factor of activated T-cells, cytoplasmic, calcineurin-dependent 4 [Source:RGD Symbol;Acc:1310749]	15:34493138-34504326	0.766756	1.01346	0.89074	0.852241	0.539189	0.449238	0.890319	0.613556	-0.537126	0.030314	0.372948	-
NONRATT007029.2	11:67650857-67654378	3522	1.99334	2.20678	2.2347	10.7109	10.4868	9.38253	2.14494	10.1934	2.24863	2.30336e-07	0.000131297	UP	trans	ENSRNOG00000060693	AC118147.2	cation channel sperm-associated protein subunit gamma precursor [Source:RefSeq peptide;Acc:NP_001163811]	1:88131554-88162583	1.04655	1.20383	1.20017	1.5625	0.831281	1.06234	1.15018	1.15204	0.00233026	0.971726	1	-
NONRATT007029.2	11:67650857-67654378	3522	1.99334	2.20678	2.2347	10.7109	10.4868	9.38253	2.14494	10.1934	2.24863	2.30336e-07	0.000131297	UP	trans	ENSRNOG00000006131	Mettl2b	methyltransferase like 2B [Source:RGD Symbol;Acc:1310240]	10:93354003-93379470	2.17677	2.05508	2.70173	2.53733	2.875	2.05042	2.3112	2.48759	0.106107	0.587519	1	-
NONRATT007029.2	11:67650857-67654378	3522	1.99334	2.20678	2.2347	10.7109	10.4868	9.38253	2.14494	10.1934	2.24863	2.30336e-07	0.000131297	UP	trans	ENSRNOG00000019318	Syt3	synaptotagmin III [Source:RGD Symbol;Acc:3805]	1:100379186-100408083	13.3424	13.0102	12.3625	12.3991	15.3097	13.6469	12.905	13.7852	0.0951874	0.307438	0.900043	-
NONRATT007029.2	11:67650857-67654378	3522	1.99334	2.20678	2.2347	10.7109	10.4868	9.38253	2.14494	10.1934	2.24863	2.30336e-07	0.000131297	UP	trans	ENSRNOG00000006965	Aff4	AF4/FMR2 family, member 4 [Source:RGD Symbol;Acc:1311694]	10:38692211-38773021	41.9815	42.3008	42.3821	44.0802	42.1591	41.6643	42.2215	42.6346	0.0140467	0.787553	1	-
NONRATT007029.2	11:67650857-67654378	3522	1.99334	2.20678	2.2347	10.7109	10.4868	9.38253	2.14494	10.1934	2.24863	2.30336e-07	0.000131297	UP	trans	ENSRNOG00000010985	Zfp410	zinc finger protein 410 [Source:RGD Symbol;Acc:1305636]	6:108032856-108058809	12.4581	13.5123	12.9194	12.9054	12.9683	13.0393	12.9633	12.971	0.000859251	0.968025	1	-
NONRATT007029.2	11:67650857-67654378	3522	1.99334	2.20678	2.2347	10.7109	10.4868	9.38253	2.14494	10.1934	2.24863	2.30336e-07	0.000131297	UP	trans	ENSRNOG00000058940	Rab11fip1	RAB11 family interacting protein 1 (class I) [Source:RGD Symbol;Acc:1562965]	16:69048739-69079332	0.848469	0.484165	0.63929	1.12838	0.859695	0.830473	0.657308	0.939516	0.515347	0.0240478	0.335628	-
NONRATT007029.2	11:67650857-67654378	3522	1.99334	2.20678	2.2347	10.7109	10.4868	9.38253	2.14494	10.1934	2.24863	2.30336e-07	0.000131297	UP	trans	ENSRNOG00000059322	N4bp2l1	NEDD4 binding protein 2-like 1 [Source:RGD Symbol;Acc:1595713]	12:546760-576746	6.48219	5.94181	6.64749	5.38101	7.53932	5.56394	6.35716	6.16143	-0.0451194	0.786778	1	-
NONRATT007029.2	11:67650857-67654378	3522	1.99334	2.20678	2.2347	10.7109	10.4868	9.38253	2.14494	10.1934	2.24863	2.30336e-07	0.000131297	UP	trans	ENSRNOG00000013166	Wnt4	wingless-type MMTV integration site family, member 4 [Source:RGD Symbol;Acc:621348]	5:155649217-155672579	3.40654	2.53916	2.4279	1.52831	2.00871	1.05445	2.7912	1.53049	-0.866893	2.80887e-05	0.0034502	-
NONRATT007029.2	11:67650857-67654378	3522	1.99334	2.20678	2.2347	10.7109	10.4868	9.38253	2.14494	10.1934	2.24863	2.30336e-07	0.000131297	UP	trans	ENSRNOG00000017157	Trim69	tripartite motif-containing 69 [Source:RGD Symbol;Acc:1305074]	3:114102875-114126523	0.346003	0.381422	0.320494	0.553485	0.530043	0.327121	0.349307	0.470216	0.428831	0.152352	0.742889	-
NONRATT007029.2	11:67650857-67654378	3522	1.99334	2.20678	2.2347	10.7109	10.4868	9.38253	2.14494	10.1934	2.24863	2.30336e-07	0.000131297	UP	trans	ENSRNOG00000001285	Atp2a2	ATPase, Ca++ transporting, cardiac muscle, slow twitch 2 [Source:RGD Symbol;Acc:2174]	12:39553903-39603326	196.217	201.939	208.236	207.592	214.783	214.062	202.131	212.146	0.0697668	0.237541	0.86089	-
NONRATT007029.2	11:67650857-67654378	3522	1.99334	2.20678	2.2347	10.7109	10.4868	9.38253	2.14494	10.1934	2.24863	2.30336e-07	0.000131297	UP	trans	ENSRNOG00000021200	Hfe2	hemochromatosis type 2 (juvenile) [Source:RGD Symbol;Acc:1310195]	2:198655437-198659317	0	0.0390139	0	0	0	0.0809731	0.0130046	0.026991	1.05345	1	1	-
NONRATT007029.2	11:67650857-67654378	3522	1.99334	2.20678	2.2347	10.7109	10.4868	9.38253	2.14494	10.1934	2.24863	2.30336e-07	0.000131297	UP	trans	ENSRNOG00000027434	Fitm2	fat storage-inducing transmembrane protein 2 [Source:RGD Symbol;Acc:1307696]	3:159856994-159863506	8.33577	9.38167	9.96192	9.37611	10.1856	9.18283	9.22645	9.5815	0.0544758	0.564283	0.997609	-
NONRATT007029.2	11:67650857-67654378	3522	1.99334	2.20678	2.2347	10.7109	10.4868	9.38253	2.14494	10.1934	2.24863	2.30336e-07	0.000131297	UP	trans	ENSRNOG00000020751	Rdm1	RAD52 motif containing 1 [Source:RGD Symbol;Acc:1310432]	10:89539556-89550500	3.24868	2.47157	2.43414	3.46453	2.6691	2.83609	2.71813	2.98991	0.137484	0.514907	0.985627	-
NONRATT007029.2	11:67650857-67654378	3522	1.99334	2.20678	2.2347	10.7109	10.4868	9.38253	2.14494	10.1934	2.24863	2.30336e-07	0.000131297	UP	trans	ENSRNOG00000012264	Alkbh1	alkB, alkylation repair homolog 1 (E. coli) [Source:RGD Symbol;Acc:1308327]	6:111456187-111477090	7.18406	6.83168	6.43492	6.56395	7.11182	7.13429	6.81689	6.93668	0.0251333	0.798863	1	-
NONRATT007029.2	11:67650857-67654378	3522	1.99334	2.20678	2.2347	10.7109	10.4868	9.38253	2.14494	10.1934	2.24863	2.30336e-07	0.000131297	UP	trans	ENSRNOG00000025406	Iqgap2	IQ motif containing GTPase activating protein 2 [Source:RGD Symbol;Acc:2321734]	2:26167199-26438790	0.775844	1.10551	0.946146	1.16281	0.588889	0.768971	0.942499	0.840222	-0.165719	0.534456	0.986465	-
NONRATT007029.2	11:67650857-67654378	3522	1.99334	2.20678	2.2347	10.7109	10.4868	9.38253	2.14494	10.1934	2.24863	2.30336e-07	0.000131297	UP	trans	ENSRNOG00000009783	Camk2g	calcium/calmodulin-dependent protein kinase II gamma [Source:RGD Symbol;Acc:621802]	15:3936786-3995915	0.779838	0.797375	0.745263	0.630036	0.840653	0.827822	0.774159	0.766171	-0.0149642	0.968218	1	-
NONRATT007029.2	11:67650857-67654378	3522	1.99334	2.20678	2.2347	10.7109	10.4868	9.38253	2.14494	10.1934	2.24863	2.30336e-07	0.000131297	UP	trans	ENSRNOG00000030118	Msn	moesin [Source:RGD Symbol;Acc:621260]	X:65226748-65295810	11.4025	12.4459	13.5055	15.4911	13.2664	12.0436	12.4513	13.6004	0.12735	0.198094	0.8131	-
NONRATT007029.2	11:67650857-67654378	3522	1.99334	2.20678	2.2347	10.7109	10.4868	9.38253	2.14494	10.1934	2.24863	2.30336e-07	0.000131297	UP	trans	ENSRNOG00000031916	Timeless	timeless circadian clock [Source:RGD Symbol;Acc:620939]	7:2643288-2667628	1.21822	0.921842	1.29338	1.13102	1.30589	0.878605	1.14448	1.10517	-0.0504203	0.826192	1	-
NONRATT007029.2	11:67650857-67654378	3522	1.99334	2.20678	2.2347	10.7109	10.4868	9.38253	2.14494	10.1934	2.24863	2.30336e-07	0.000131297	UP	trans	ENSRNOG00000001811	Fgfr1op2	FGFR1 oncogene partner 2 [Source:RGD Symbol;Acc:1303233]	4:180887182-180908198	10.2824	11.1537	10.672	10.5839	9.74708	11.1028	10.7027	10.4779	-0.030618	0.769729	1	-
NONRATT007029.2	11:67650857-67654378	3522	1.99334	2.20678	2.2347	10.7109	10.4868	9.38253	2.14494	10.1934	2.24863	2.30336e-07	0.000131297	UP	trans	ENSRNOG00000054724	Pycrl	pyrroline-5-carboxylate reductase-like [Source:RGD Symbol;Acc:1309115]	7:116949879-116955148	8.86453	11.3178	7.56542	7.97272	10.0648	8.30102	9.24925	8.7795	-0.0751981	0.695575	1	-
NONRATT007029.2	11:67650857-67654378	3522	1.99334	2.20678	2.2347	10.7109	10.4868	9.38253	2.14494	10.1934	2.24863	2.30336e-07	0.000131297	UP	trans	ENSRNOG00000000956	Rasl11a	RAS-like family 11 member A [Source:RGD Symbol;Acc:1303231]	12:9985928-9990284	0.656831	0.92345	1.1048	1.26086	1.03846	0.766961	0.895026	1.02209	0.191527	0.553052	0.996223	-
NONRATT007029.2	11:67650857-67654378	3522	1.99334	2.20678	2.2347	10.7109	10.4868	9.38253	2.14494	10.1934	2.24863	2.30336e-07	0.000131297	UP	trans	ENSRNOG00000027979	LOC500354	similar to C030030A07Rik protein [Source:RGD Symbol;Acc:1563896]	4:170820594-170821995	0.0558685	0.0589383	0	0	0	0.305845	0.0382689	0.101948	1.41359	0.540759	0.989456	-
NONRATT007029.2	11:67650857-67654378	3522	1.99334	2.20678	2.2347	10.7109	10.4868	9.38253	2.14494	10.1934	2.24863	2.30336e-07	0.000131297	UP	trans	ENSRNOG00000000457	Tap1	transporter 1, ATP-binding cassette, sub-family B (MDR/TAP) [Source:RGD Symbol;Acc:3817]	20:3979035-3989669	0.945901	1.09549	1.15862	1.12449	0.948396	1.05245	1.06667	1.04178	-0.0340644	0.905388	1	-
NONRATT007029.2	11:67650857-67654378	3522	1.99334	2.20678	2.2347	10.7109	10.4868	9.38253	2.14494	10.1934	2.24863	2.30336e-07	0.000131297	UP	trans	ENSRNOG00000026061	RGD1566226	similar to hypothetical protein F830045P16 [Source:RGD Symbol;Acc:1566226]	3:121977350-122057632	0	0.0513461	0.141771	0.0259723	0.0607893	0.13329	0.0643723	0.0733507	0.18837	1	1	-
NONRATT007029.2	11:67650857-67654378	3522	1.99334	2.20678	2.2347	10.7109	10.4868	9.38253	2.14494	10.1934	2.24863	2.30336e-07	0.000131297	UP	trans	ENSRNOG00000018326	Pgls	6-phosphogluconolactonase [Source:RGD Symbol;Acc:1307001]	16:20020444-20025930	2.50579	2.88553	2.91144	2.46129	2.26346	2.99573	2.76759	2.57349	-0.104901	0.632372	1	-
NONRATT007029.2	11:67650857-67654378	3522	1.99334	2.20678	2.2347	10.7109	10.4868	9.38253	2.14494	10.1934	2.24863	2.30336e-07	0.000131297	UP	trans	ENSRNOG00000024450	Poc1b	POC1 centriolar protein B [Source:RGD Symbol;Acc:2323942]	7:41304440-41404370	3.84877	3.72011	3.31974	3.53439	3.66972	3.33549	3.62954	3.5132	-0.0470009	0.775396	1	-
NONRATT007029.2	11:67650857-67654378	3522	1.99334	2.20678	2.2347	10.7109	10.4868	9.38253	2.14494	10.1934	2.24863	2.30336e-07	0.000131297	UP	trans	ENSRNOG00000002866	Rassf6	Ras association (RalGDS/AF-6) domain family member 6 [Source:RGD Symbol;Acc:1566082]	14:18983853-19025971	0.993499	0.853581	0.946205	1.25569	1.33192	0.866033	0.931095	1.15121	0.306155	0.187405	0.80017	-
NONRATT007029.2	11:67650857-67654378	3522	1.99334	2.20678	2.2347	10.7109	10.4868	9.38253	2.14494	10.1934	2.24863	2.30336e-07	0.000131297	UP	trans	ENSRNOG00000007203	Psmc6	proteasome (prosome, macropain) 26S subunit, ATPase, 6 [Source:RGD Symbol;Acc:1308825]	15:19667453-19688914	42.7093	36.2148	38.0885	37.6804	37.0739	35.7233	39.0042	36.8259	-0.0829089	0.341623	0.927539	-
NONRATT007029.2	11:67650857-67654378	3522	1.99334	2.20678	2.2347	10.7109	10.4868	9.38253	2.14494	10.1934	2.24863	2.30336e-07	0.000131297	UP	trans	ENSRNOG00000059801	Lima1	LIM domain and actin binding 1 [Source:RGD Symbol;Acc:1564050]	7:141428063-141528397	5.61361	6.81087	6.98366	6.65811	5.74921	6.95279	6.46938	6.45337	-0.00357508	1	1	-
NONRATT007029.2	11:67650857-67654378	3522	1.99334	2.20678	2.2347	10.7109	10.4868	9.38253	2.14494	10.1934	2.24863	2.30336e-07	0.000131297	UP	trans	ENSRNOG00000002011	Gnrhr	gonadotropin releasing hormone receptor [Source:RGD Symbol;Acc:70513]	14:23480462-23498450	0.0597237	0	0	0	0	0.0653835	0.0199079	0.0217945	0.130624	1	1	-
NONRATT007029.2	11:67650857-67654378	3522	1.99334	2.20678	2.2347	10.7109	10.4868	9.38253	2.14494	10.1934	2.24863	2.30336e-07	0.000131297	UP	trans	ENSRNOG00000024128	Aco2	aconitase 2, mitochondrial [Source:RGD Symbol;Acc:621360]	7:123102468-123145635	85.9296	85.3972	86.1453	90.4904	87.6567	86.809	85.824	88.3187	0.0413374	0.469104	0.985627	-
NONRATT007029.2	11:67650857-67654378	3522	1.99334	2.20678	2.2347	10.7109	10.4868	9.38253	2.14494	10.1934	2.24863	2.30336e-07	0.000131297	UP	trans	ENSRNOG00000019220	Rhod	ras homolog family member D [Source:RGD Symbol;Acc:1310985]	1:219668352-219682287	0.210894	0.222371	0	0	0	0	0.144422	0	#NAME?	0.0133862	0.243091	-
NONRATT007029.2	11:67650857-67654378	3522	1.99334	2.20678	2.2347	10.7109	10.4868	9.38253	2.14494	10.1934	2.24863	2.30336e-07	0.000131297	UP	trans	ENSRNOG00000005153	LOC690422	hypothetical protein LOC690422 [Source:RGD Symbol;Acc:1596085]	6:137967401-137980217	2.08958	2.53894	2.32308	2.25792	3.10912	3.07521	2.3172	2.81408	0.280283	0.0731977	0.564246	-
NONRATT007029.2	11:67650857-67654378	3522	1.99334	2.20678	2.2347	10.7109	10.4868	9.38253	2.14494	10.1934	2.24863	2.30336e-07	0.000131297	UP	trans	ENSRNOG00000019208	P2rx5	purinergic receptor P2X, ligand-gated ion channel, 5 [Source:RGD Symbol;Acc:620256]	10:59725619-59740865	1.04952	1.10666	1.04357	1.06398	1.43939	1.07799	1.06658	1.19379	0.162555	0.405814	0.963023	-
NONRATT007029.2	11:67650857-67654378	3522	1.99334	2.20678	2.2347	10.7109	10.4868	9.38253	2.14494	10.1934	2.24863	2.30336e-07	0.000131297	UP	trans	ENSRNOG00000006658	RGD1563015	RGD1563015 [Source:RGD Symbol;Acc:1563015]	5:138254946-138267601	0	0	0.0895321	0.0492066	0	0.101002	0.029844	0.0500695	0.746489	1	1	-
NONRATT007029.2	11:67650857-67654378	3522	1.99334	2.20678	2.2347	10.7109	10.4868	9.38253	2.14494	10.1934	2.24863	2.30336e-07	0.000131297	UP	trans	ENSRNOG00000054385	Rhebl1	GTPase RhebL1 [Source:UniProtKB/Swiss-Prot;Acc:Q7TNZ5]	7:140552733-140556639	2.98241	2.02664	1.86505	1.41361	1.15813	1.95895	2.29137	1.51023	-0.601438	0.0625568	0.527503	-
NONRATT007029.2	11:67650857-67654378	3522	1.99334	2.20678	2.2347	10.7109	10.4868	9.38253	2.14494	10.1934	2.24863	2.30336e-07	0.000131297	UP	trans	ENSRNOG00000000934	Piwil1	piwi-like RNA-mediated gene silencing 1 [Source:RGD Symbol;Acc:1306980]	12:31609053-31629881	0.0586724	0.0206321	0.0379589	0.0417243	0	0.0214215	0.0390878	0.0210486	-0.892994	0.519743	0.985627	-
NONRATT007029.2	11:67650857-67654378	3522	1.99334	2.20678	2.2347	10.7109	10.4868	9.38253	2.14494	10.1934	2.24863	2.30336e-07	0.000131297	UP	trans	ENSRNOG00000016953	Chst4	carbohydrate (N-acetylglucosamine 6-O) sulfotransferase 4 [Source:RGD Symbol;Acc:1310798]	19:41631715-41640367	0.282043	0.0371879	0.205255	0.0752051	0.220026	0.154366	0.174829	0.149866	-0.22227	0.864102	1	-
NONRATT007029.2	11:67650857-67654378	3522	1.99334	2.20678	2.2347	10.7109	10.4868	9.38253	2.14494	10.1934	2.24863	2.30336e-07	0.000131297	UP	trans	ENSRNOG00000043204	Harbi1	harbinger transposase derived 1 [Source:RGD Symbol;Acc:1584007]	3:80614937-80624205	6.8951	7.50936	7.79018	6.69724	6.06084	7.15829	7.39821	6.63879	-0.156256	0.235197	0.859098	-
NONRATT007029.2	11:67650857-67654378	3522	1.99334	2.20678	2.2347	10.7109	10.4868	9.38253	2.14494	10.1934	2.24863	2.30336e-07	0.000131297	UP	trans	ENSRNOG00000018714	Arl5b	ADP-ribosylation factor-like 5B [Source:RGD Symbol;Acc:1305569]	17:82065937-82091362	7.81775	7.87212	7.45796	8.13374	6.60908	6.90429	7.71594	7.2157	-0.0967022	0.364282	0.94801	-
NONRATT007029.2	11:67650857-67654378	3522	1.99334	2.20678	2.2347	10.7109	10.4868	9.38253	2.14494	10.1934	2.24863	2.30336e-07	0.000131297	UP	trans	ENSRNOG00000007023	Galm	galactose mutarotase (aldose 1-epimerase) [Source:RGD Symbol;Acc:1359459]	6:2808841-2860744	4.02866	5.81863	3.84356	5.77652	6.04268	5.67022	4.56361	5.82981	0.353272	0.0398192	0.421104	-
NONRATT007029.2	11:67650857-67654378	3522	1.99334	2.20678	2.2347	10.7109	10.4868	9.38253	2.14494	10.1934	2.24863	2.30336e-07	0.000131297	UP	trans	ENSRNOG00000008619	Agtrap	angiotensin II receptor-associated protein [Source:RGD Symbol;Acc:1359346]	5:164886813-164898420	11.1137	11.0742	10.7404	13.1313	12.4028	9.86175	10.9761	11.7986	0.104254	0.338175	0.923339	-
NONRATT007029.2	11:67650857-67654378	3522	1.99334	2.20678	2.2347	10.7109	10.4868	9.38253	2.14494	10.1934	2.24863	2.30336e-07	0.000131297	UP	trans	ENSRNOG00000057141	AABR07035641.1	-	12:20592216-20660304	0	0	0	0	0.0567167	0	0	0.0189056	Inf	0.297357	0.891638	-
NONRATT007029.2	11:67650857-67654378	3522	1.99334	2.20678	2.2347	10.7109	10.4868	9.38253	2.14494	10.1934	2.24863	2.30336e-07	0.000131297	UP	trans	ENSRNOG00000049019	Tmem170a	transmembrane protein 170A [Source:RGD Symbol;Acc:1559505]	19:44088612-44101365	2.28755	1.96069	1.9212	2.79618	2.0538	2.70922	2.05648	2.51973	0.293092	0.0582882	0.506017	-
NONRATT007029.2	11:67650857-67654378	3522	1.99334	2.20678	2.2347	10.7109	10.4868	9.38253	2.14494	10.1934	2.24863	2.30336e-07	0.000131297	UP	trans	ENSRNOG00000011573	Csad	cysteine sulfinic acid decarboxylase [Source:RGD Symbol;Acc:621030]	7:143781702-143793970	8.13267	7.06851	7.16048	10.1692	9.40519	7.19623	7.45389	8.92355	0.259625	0.0563327	0.498673	-
NONRATT007029.2	11:67650857-67654378	3522	1.99334	2.20678	2.2347	10.7109	10.4868	9.38253	2.14494	10.1934	2.24863	2.30336e-07	0.000131297	UP	trans	ENSRNOG00000007504	Actr10	actin-related protein 10 homolog (S. cerevisiae) [Source:RGD Symbol;Acc:1306515]	6:93385457-93411576	43.8962	47.2184	45.6532	42.7443	47.5452	47.3271	45.5893	45.8722	0.00892341	0.890704	1	-
NONRATT007029.2	11:67650857-67654378	3522	1.99334	2.20678	2.2347	10.7109	10.4868	9.38253	2.14494	10.1934	2.24863	2.30336e-07	0.000131297	UP	trans	ENSRNOG00000010169	Atpaf1	ATP synthase mitochondrial F1 complex assembly factor 1 [Source:RGD Symbol;Acc:1305417]	5:134641608-134667084	20.4177	19.9905	20.5596	24.0164	22.9897	22.4394	20.3226	23.1485	0.187833	0.00548453	0.14759	-
NONRATT007029.2	11:67650857-67654378	3522	1.99334	2.20678	2.2347	10.7109	10.4868	9.38253	2.14494	10.1934	2.24863	2.30336e-07	0.000131297	UP	trans	ENSRNOG00000042029	Efs	embryonal Fyn-associated substrate [Source:RGD Symbol;Acc:1308966]	15:33578381-33589522	4.14809	4.00781	3.98969	3.66366	3.46694	3.78077	4.04853	3.63712	-0.154601	0.214626	0.833551	-
NONRATT007029.2	11:67650857-67654378	3522	1.99334	2.20678	2.2347	10.7109	10.4868	9.38253	2.14494	10.1934	2.24863	2.30336e-07	0.000131297	UP	trans	ENSRNOG00000012436	Adh6	alcohol dehydrogenase 6 (class V) [Source:RGD Symbol;Acc:1306313]	2:243550627-243687857	0.133459	0.445605	0.107922	0.260931	0.277625	0.0973884	0.228995	0.211981	-0.111381	0.92726	1	-
NONRATT007029.2	11:67650857-67654378	3522	1.99334	2.20678	2.2347	10.7109	10.4868	9.38253	2.14494	10.1934	2.24863	2.30336e-07	0.000131297	UP	trans	ENSRNOG00000024266	Haus5	HAUS augmin-like complex, subunit 5 [Source:RGD Symbol;Acc:2318093]	1:89109750-89124132	1.97272	1.62509	1.66003	1.54496	1.59667	1.67028	1.75261	1.60397	-0.127858	0.472342	0.985627	-
NONRATT007029.2	11:67650857-67654378	3522	1.99334	2.20678	2.2347	10.7109	10.4868	9.38253	2.14494	10.1934	2.24863	2.30336e-07	0.000131297	UP	trans	ENSRNOG00000001134	Rfc5	replication factor C (activator 1) 5 [Source:RGD Symbol;Acc:1309280]	12:44931494-44941324	4.68202	4.32869	4.51032	4.01615	5.25113	3.52834	4.50701	4.26521	-0.0795544	0.66023	1	-
NONRATT007029.2	11:67650857-67654378	3522	1.99334	2.20678	2.2347	10.7109	10.4868	9.38253	2.14494	10.1934	2.24863	2.30336e-07	0.000131297	UP	trans	ENSRNOG00000015150	Spg7	spastic paraplegia 7 homolog (human) [Source:RGD Symbol;Acc:727940]	19:55880561-55915502	9.72246	13.5925	9.72067	10.6499	12.6007	13.4655	11.0119	12.2387	0.152391	0.236484	0.860812	-
NONRATT007029.2	11:67650857-67654378	3522	1.99334	2.20678	2.2347	10.7109	10.4868	9.38253	2.14494	10.1934	2.24863	2.30336e-07	0.000131297	UP	trans	ENSRNOG00000004158	Hdac9	histone deacetylase 9 [Source:RGD Symbol;Acc:1310748]	6:53488883-54059119	5.5243	5.41303	5.53962	6.23852	5.93354	5.06133	5.49232	5.74447	0.0647581	0.502592	0.985627	-
NONRATT007029.2	11:67650857-67654378	3522	1.99334	2.20678	2.2347	10.7109	10.4868	9.38253	2.14494	10.1934	2.24863	2.30336e-07	0.000131297	UP	trans	ENSRNOG00000000394	Srgn	serglycin [Source:RGD Symbol;Acc:619969]	20:32120320-32139789	5.9778	7.97474	6.50568	7.18498	5.73004	4.95312	6.8194	5.95605	-0.195291	0.248209	0.866649	-
NONRATT007029.2	11:67650857-67654378	3522	1.99334	2.20678	2.2347	10.7109	10.4868	9.38253	2.14494	10.1934	2.24863	2.30336e-07	0.000131297	UP	trans	ENSRNOG00000036760	Tmc5	transmembrane channel-like 5 [Source:RGD Symbol;Acc:1307037]	1:188278469-188337308	1.27285	1.09811	1.45972	0.987207	1.44433	1.14005	1.27689	1.19053	-0.101037	0.651404	1	-
NONRATT007029.2	11:67650857-67654378	3522	1.99334	2.20678	2.2347	10.7109	10.4868	9.38253	2.14494	10.1934	2.24863	2.30336e-07	0.000131297	UP	trans	ENSRNOG00000014584	Odf2	outer dense fiber of sperm tails 2 [Source:RGD Symbol;Acc:3229]	3:8450275-8496008	10.228	10.8149	10.3546	9.93254	9.64621	8.85098	10.4659	9.47658	-0.143254	0.0977163	0.635044	-
NONRATT007029.2	11:67650857-67654378	3522	1.99334	2.20678	2.2347	10.7109	10.4868	9.38253	2.14494	10.1934	2.24863	2.30336e-07	0.000131297	UP	trans	ENSRNOG00000031162	Ccl24	chemokine (C-C motif) ligand 24 [Source:RGD Symbol;Acc:1310245]	12:24148567-24152625	0.704244	0.386148	0.300675	0.270368	0.210959	0.123338	0.463689	0.201555	-1.20199	0.0123896	0.232684	-
NONRATT007029.2	11:67650857-67654378	3522	1.99334	2.20678	2.2347	10.7109	10.4868	9.38253	2.14494	10.1934	2.24863	2.30336e-07	0.000131297	UP	trans	ENSRNOG00000017181	Malt1	MALT1 paracaspase [Source:RGD Symbol;Acc:1309195]	18:61109069-61162445	4.51648	4.69527	4.52152	5.49491	4.86327	5.83207	4.57775	5.39675	0.237451	0.0321924	0.384443	-
NONRATT007029.2	11:67650857-67654378	3522	1.99334	2.20678	2.2347	10.7109	10.4868	9.38253	2.14494	10.1934	2.24863	2.30336e-07	0.000131297	UP	trans	ENSRNOG00000019727	Dph3	diphthamide biosynthesis 3 [Source:RGD Symbol;Acc:1590566]	16:8202048-8207464	6.69334	6.21689	6.51843	6.69992	6.60522	7.16851	6.47622	6.82455	0.075582	0.482152	0.985627	-
NONRATT007029.2	11:67650857-67654378	3522	1.99334	2.20678	2.2347	10.7109	10.4868	9.38253	2.14494	10.1934	2.24863	2.30336e-07	0.000131297	UP	trans	ENSRNOG00000019629	Lamp1	lysosomal-associated membrane protein 1 [Source:RGD Symbol;Acc:2989]	16:81689590-81706561	235.882	237.935	238.169	220.417	226.209	228.586	237.329	225.071	-0.0765075	0.242035	0.86383	-
NONRATT007029.2	11:67650857-67654378	3522	1.99334	2.20678	2.2347	10.7109	10.4868	9.38253	2.14494	10.1934	2.24863	2.30336e-07	0.000131297	UP	trans	ENSRNOG00000012037	Galnt7	polypeptide N-acetylgalactosaminyltransferase 7 [Source:RGD Symbol;Acc:620362]	16:35934970-36062719	7.22681	7.34749	7.41127	6.97679	7.9	7.66139	7.32853	7.51272	0.0358128	0.691238	1	-
NONRATT007029.2	11:67650857-67654378	3522	1.99334	2.20678	2.2347	10.7109	10.4868	9.38253	2.14494	10.1934	2.24863	2.30336e-07	0.000131297	UP	trans	ENSRNOG00000029064	Zcchc4	zinc finger, CCHC domain containing 4 [Source:RGD Symbol;Acc:1311414]	14:60511497-60552990	2.59968	2.44032	3.4763	3.11046	2.88871	2.98468	2.83877	2.99462	0.077107	0.695879	1	-
NONRATT007029.2	11:67650857-67654378	3522	1.99334	2.20678	2.2347	10.7109	10.4868	9.38253	2.14494	10.1934	2.24863	2.30336e-07	0.000131297	UP	trans	ENSRNOG00000005006	Ndufaf1	NADH dehydrogenase (ubiquinone) complex I, assembly factor 1 [Source:RGD Symbol;Acc:1306202]	3:111458572-111469518	16.6459	14.6918	14.5174	13.7193	14.4159	12.9581	15.285	13.6978	-0.158181	0.156201	0.74887	-
NONRATT007029.2	11:67650857-67654378	3522	1.99334	2.20678	2.2347	10.7109	10.4868	9.38253	2.14494	10.1934	2.24863	2.30336e-07	0.000131297	UP	trans	ENSRNOG00000003298	Cd247	Cd247 molecule [Source:RGD Symbol;Acc:2305]	13:83996080-84071400	0.0458861	0.145174	0.0890601	0.0489472	0	0	0.0933734	0.0163157	-2.51675	0.133403	0.713397	-
NONRATT007029.2	11:67650857-67654378	3522	1.99334	2.20678	2.2347	10.7109	10.4868	9.38253	2.14494	10.1934	2.24863	2.30336e-07	0.000131297	UP	trans	ENSRNOG00000001073	RGD1563482	similar to hypothetical protein FLJ38663 [Source:RGD Symbol;Acc:1563482]	12:37677019-37699616	1.20986	1.05646	1.32076	1.33056	1.43935	1.13819	1.19569	1.3027	0.123653	0.550561	0.995443	-
NONRATT007029.2	11:67650857-67654378	3522	1.99334	2.20678	2.2347	10.7109	10.4868	9.38253	2.14494	10.1934	2.24863	2.30336e-07	0.000131297	UP	trans	ENSRNOG00000014409	Myl7	myosin, light chain 7, regulatory [Source:RGD Symbol;Acc:1308262]	14:86143862-86147553	0.0672918	0	0.0326679	0	0	0	0.0333199	0	#NAME?	0.263998	0.866649	-
NONRATT007029.2	11:67650857-67654378	3522	1.99334	2.20678	2.2347	10.7109	10.4868	9.38253	2.14494	10.1934	2.24863	2.30336e-07	0.000131297	UP	trans	ENSRNOG00000002549	Htr5b	5-hydroxytryptamine (serotonin) receptor 5B [Source:RGD Symbol;Acc:62388]	13:37479758-37492680	0	0.111728	0.034288	0.0753407	0.132254	0.116003	0.0486719	0.107866	1.14808	0.405764	0.963023	-
NONRATT007029.2	11:67650857-67654378	3522	1.99334	2.20678	2.2347	10.7109	10.4868	9.38253	2.14494	10.1934	2.24863	2.30336e-07	0.000131297	UP	trans	ENSRNOG00000003111	Ovca2	ovarian tumor suppressor candidate 2 [Source:RGD Symbol;Acc:1564623]	10:62017347-62020509	4.59088	3.12401	4.42893	4.35505	3.96455	4.55816	4.04794	4.29259	0.0846605	0.608581	1	-
NONRATT007029.2	11:67650857-67654378	3522	1.99334	2.20678	2.2347	10.7109	10.4868	9.38253	2.14494	10.1934	2.24863	2.30336e-07	0.000131297	UP	trans	ENSRNOG00000026762	RT1-DOa	RT1 class II, locus DOa [Source:RGD Symbol;Acc:3477]	20:3889370-3892449	0.0744559	0.0261824	0.0481703	0.158819	0.0619642	0.0271842	0.0496029	0.0826559	0.736694	0.635604	1	-
NONRATT007029.2	11:67650857-67654378	3522	1.99334	2.20678	2.2347	10.7109	10.4868	9.38253	2.14494	10.1934	2.24863	2.30336e-07	0.000131297	UP	trans	ENSRNOG00000023312	Lonrf2	LON peptidase N-terminal domain and ring finger 2 [Source:RGD Symbol;Acc:1562137]	9:45466688-45505767	90.6862	94.6731	93.1615	93.1723	93.788	96.8227	92.8403	94.5943	0.027003	0.629321	1	-
NONRATT007029.2	11:67650857-67654378	3522	1.99334	2.20678	2.2347	10.7109	10.4868	9.38253	2.14494	10.1934	2.24863	2.30336e-07	0.000131297	UP	cis	ENSRNOG00000051711	Kpna1	karyopherin alpha 1 [Source:RGD Symbol;Acc:735064]	11:67652577-67703025	29.1123	30.2965	30.1631	28.7563	29.4275	28.1275	29.8573	28.7704	-0.053497	0.461319	0.985627	-
NONRATT007029.2	11:67650857-67654378	3522	1.99334	2.20678	2.2347	10.7109	10.4868	9.38253	2.14494	10.1934	2.24863	2.30336e-07	0.000131297	UP	trans	ENSRNOG00000003622	Cybb	cytochrome b-245, beta polypeptide [Source:RGD Symbol;Acc:620574]	X:14578264-14612547	1.9049	1.75752	1.88399	3.51596	2.14905	1.44366	1.8488	2.36956	0.358028	0.171499	0.773801	-
NONRATT007029.2	11:67650857-67654378	3522	1.99334	2.20678	2.2347	10.7109	10.4868	9.38253	2.14494	10.1934	2.24863	2.30336e-07	0.000131297	UP	trans	ENSRNOG00000012818	Ksr1	kinase suppressor of ras 1 [Source:RGD Symbol;Acc:1308105]	10:66347358-66482150	1.74712	1.82241	1.5495	1.60273	1.96971	1.89202	1.70634	1.82149	0.0942078	0.592258	1	-
NONRATT007029.2	11:67650857-67654378	3522	1.99334	2.20678	2.2347	10.7109	10.4868	9.38253	2.14494	10.1934	2.24863	2.30336e-07	0.000131297	UP	trans	ENSRNOG00000014049	Riok1	RIO kinase 1 [Source:RGD Symbol;Acc:1306086]	17:27429416-27452314	8.9457	9.21704	9.05262	8.01358	8.13516	8.72965	9.07179	8.2928	-0.129528	0.230913	0.856823	-
NONRATT007029.2	11:67650857-67654378	3522	1.99334	2.20678	2.2347	10.7109	10.4868	9.38253	2.14494	10.1934	2.24863	2.30336e-07	0.000131297	UP	trans	ENSRNOG00000021555	Mis18a	MIS18 kinetochore protein A [Source:RGD Symbol;Acc:1310778]	11:30879887-30893310	0	0.941811	0.611824	0	0	0.0575407	0.517878	0.0191802	-4.75492	0.000454164	0.0269218	DOWN
NONRATT007029.2	11:67650857-67654378	3522	1.99334	2.20678	2.2347	10.7109	10.4868	9.38253	2.14494	10.1934	2.24863	2.30336e-07	0.000131297	UP	trans	ENSRNOG00000009348	Nos3	nitric oxide synthase 3, endothelial cell [Source:RGD Symbol;Acc:3186]	4:7320668-7342410	3.41995	4.25062	4.20827	3.24363	3.59665	2.45341	3.95961	3.09789	-0.354071	0.0214427	0.31622	-
NONRATT007029.2	11:67650857-67654378	3522	1.99334	2.20678	2.2347	10.7109	10.4868	9.38253	2.14494	10.1934	2.24863	2.30336e-07	0.000131297	UP	trans	ENSRNOG00000022971	LOC102555919	zinc finger protein 454-like [Source:RGD Symbol;Acc:7529496]	10:36361312-36372436	3.28487	3.01614	3.97546	2.71589	2.83323	3.13131	3.42549	2.89348	-0.243505	0.110334	0.668532	-
NONRATT007029.2	11:67650857-67654378	3522	1.99334	2.20678	2.2347	10.7109	10.4868	9.38253	2.14494	10.1934	2.24863	2.30336e-07	0.000131297	UP	trans	ENSRNOG00000034134	Cpm	carboxypeptidase M [Source:RGD Symbol;Acc:1310532]	7:60654350-60714620	18.327	17.8696	18.4812	13.6275	17.8339	16.4434	18.2259	15.9683	-0.190784	0.0517655	0.477497	-
NONRATT007029.2	11:67650857-67654378	3522	1.99334	2.20678	2.2347	10.7109	10.4868	9.38253	2.14494	10.1934	2.24863	2.30336e-07	0.000131297	UP	trans	ENSRNOG00000047080	Gng4	guanine nucleotide binding protein (G protein), gamma 4 [Source:RGD Symbol;Acc:620806]	17:90266794-90315492	16.4472	15.3151	17.397	11.9703	12.6808	13.141	16.3864	12.5974	-0.379382	5.09902e-05	0.00554367	-
NONRATT007029.2	11:67650857-67654378	3522	1.99334	2.20678	2.2347	10.7109	10.4868	9.38253	2.14494	10.1934	2.24863	2.30336e-07	0.000131297	UP	trans	ENSRNOG00000048606	Vma21	VMA21 vacuolar H+-ATPase homolog (S. cerevisiae) [Source:RGD Symbol;Acc:1566155]	16:70142761-70242979	1.20374	1.16853	1.46472	0.876184	0.953971	0.857578	1.279	0.895911	-0.513586	0.0150244	0.261321	-
NONRATT007029.2	11:67650857-67654378	3522	1.99334	2.20678	2.2347	10.7109	10.4868	9.38253	2.14494	10.1934	2.24863	2.30336e-07	0.000131297	UP	trans	ENSRNOG00000001189	Sik1	salt-inducible kinase 1 [Source:RGD Symbol;Acc:69407]	20:10668411-10680283	4.4482	5.1544	5.00273	4.81076	4.80668	4.92109	4.86845	4.84617	-0.00661556	0.987932	1	-
NONRATT007029.2	11:67650857-67654378	3522	1.99334	2.20678	2.2347	10.7109	10.4868	9.38253	2.14494	10.1934	2.24863	2.30336e-07	0.000131297	UP	trans	ENSRNOG00000056011	AC139950.1	-	6:78172762-78180924	4.88475	4.62115	3.94263	4.67375	4.44464	4.44781	4.48284	4.52207	0.0125674	0.9504	1	-
NONRATT007029.2	11:67650857-67654378	3522	1.99334	2.20678	2.2347	10.7109	10.4868	9.38253	2.14494	10.1934	2.24863	2.30336e-07	0.000131297	UP	trans	ENSRNOG00000016926	Plekhs1	pleckstrin homology domain containing, family S member 1 [Source:RGD Symbol;Acc:1559884]	1:277261681-277291370	0	0	0	0.0330249	0.038648	0.0339103	0	0.0351944	Inf	0.252613	0.866649	-
NONRATT007029.2	11:67650857-67654378	3522	1.99334	2.20678	2.2347	10.7109	10.4868	9.38253	2.14494	10.1934	2.24863	2.30336e-07	0.000131297	UP	trans	ENSRNOG00000010855	Mrp63	mitochondrial ribosomal protein 63 [Source:RGD Symbol;Acc:1594654]	15:38095803-38097835	3.49254	3.12599	4.29543	3.20485	2.63589	3.86777	3.63799	3.23617	-0.168852	0.454293	0.985627	-
NONRATT007029.2	11:67650857-67654378	3522	1.99334	2.20678	2.2347	10.7109	10.4868	9.38253	2.14494	10.1934	2.24863	2.30336e-07	0.000131297	UP	trans	ENSRNOG00000016632	Dsg3	desmoglein 3 [Source:RGD Symbol;Acc:1592103]	18:15650526-15688284	0	0.0234598	0.0108011	0.0237332	0	0	0.0114203	0.00791108	-0.529654	1	1	-
NONRATT007029.2	11:67650857-67654378	3522	1.99334	2.20678	2.2347	10.7109	10.4868	9.38253	2.14494	10.1934	2.24863	2.30336e-07	0.000131297	UP	trans	ENSRNOG00000016683	Zfp668	zinc finger protein 668 [Source:RGD Symbol;Acc:1308623]	1:199310935-199320727	3.71494	3.13373	3.37955	3.51603	3.24585	3.20255	3.40941	3.32148	-0.037695	0.825136	1	-
NONRATT007029.2	11:67650857-67654378	3522	1.99334	2.20678	2.2347	10.7109	10.4868	9.38253	2.14494	10.1934	2.24863	2.30336e-07	0.000131297	UP	trans	ENSRNOG00000003457	Ccdc64b	coiled-coil domain containing 64B [Source:RGD Symbol;Acc:1306729]	10:12980674-12992780	0.0139002	0	0	0.0148275	0	0	0.0046334	0.0049425	0.0931683	1	1	-
NONRATT007029.2	11:67650857-67654378	3522	1.99334	2.20678	2.2347	10.7109	10.4868	9.38253	2.14494	10.1934	2.24863	2.30336e-07	0.000131297	UP	trans	ENSRNOG00000025423	Map3k13	mitogen-activated protein kinase kinase kinase 13 [Source:RGD Symbol;Acc:1561227]	11:82745735-82938357	6.9883	7.20383	7.63323	6.56748	6.53078	6.26755	7.27512	6.45527	-0.172494	0.0511823	0.474179	-
NONRATT007029.2	11:67650857-67654378	3522	1.99334	2.20678	2.2347	10.7109	10.4868	9.38253	2.14494	10.1934	2.24863	2.30336e-07	0.000131297	UP	trans	ENSRNOG00000027787	Cdc6	cell division cycle 6 [Source:RGD Symbol;Acc:1309157]	10:86819472-86833402	0.139181	0.167717	0.154341	0.169629	0.322623	0.0653031	0.153746	0.185852	0.273603	0.721397	1	-
NONRATT007029.2	11:67650857-67654378	3522	1.99334	2.20678	2.2347	10.7109	10.4868	9.38253	2.14494	10.1934	2.24863	2.30336e-07	0.000131297	UP	trans	ENSRNOG00000028662	Zfp69	zinc finger protein 69 [Source:RGD Symbol;Acc:2322990]	5:139857363-139864393	0.871512	1.05508	1.12757	0.894983	1.36984	0.989363	1.01805	1.08473	0.091523	0.763972	1	-
NONRATT007029.2	11:67650857-67654378	3522	1.99334	2.20678	2.2347	10.7109	10.4868	9.38253	2.14494	10.1934	2.24863	2.30336e-07	0.000131297	UP	trans	ENSRNOG00000026488	Gltpd2	glycolipid transfer protein domain containing 2 [Source:RGD Symbol;Acc:1560459]	10:57125961-57128686	0.0640979	0.236602	0.124407	0.205087	0.160032	0.175448	0.141702	0.180189	0.346649	0.598198	1	-
NONRATT007029.2	11:67650857-67654378	3522	1.99334	2.20678	2.2347	10.7109	10.4868	9.38253	2.14494	10.1934	2.24863	2.30336e-07	0.000131297	UP	trans	ENSRNOG00000014265	Tnfrsf19	tumor necrosis factor receptor superfamily, member 19 [Source:RGD Symbol;Acc:1564996]	15:41246308-41338284	10.418	10.5775	9.63542	10.8931	10.9465	11.0037	10.2103	10.9478	0.100608	0.251611	0.866649	-
NONRATT007029.2	11:67650857-67654378	3522	1.99334	2.20678	2.2347	10.7109	10.4868	9.38253	2.14494	10.1934	2.24863	2.30336e-07	0.000131297	UP	trans	ENSRNOG00000017253	Ccdc107	coiled-coil domain containing 107 [Source:RGD Symbol;Acc:1560252]	5:58995249-58997953	30.8557	34.8905	32.9916	27.877	28.4981	34.5022	32.9126	30.2925	-0.11968	0.319544	0.909036	-
NONRATT007029.2	11:67650857-67654378	3522	1.99334	2.20678	2.2347	10.7109	10.4868	9.38253	2.14494	10.1934	2.24863	2.30336e-07	0.000131297	UP	trans	ENSRNOG00000014935	Peo1	progressive external ophthalmoplegia 1 [Source:RGD Symbol;Acc:1307884]	1:264756499-264762892	11.5517	12.5935	10.935	11.4608	11.5405	12.0027	11.6934	11.668	-0.00313946	1	1	-
NONRATT007029.2	11:67650857-67654378	3522	1.99334	2.20678	2.2347	10.7109	10.4868	9.38253	2.14494	10.1934	2.24863	2.30336e-07	0.000131297	UP	trans	ENSRNOG00000012965	Themis2	thymocyte selection associated family member 2 [Source:RGD Symbol;Acc:1561016]	5:150970909-150987081	0.388492	0.368676	0.452364	0.600739	0.557632	0.55286	0.403177	0.57041	0.500586	0.0865829	0.604186	-
NONRATT007029.2	11:67650857-67654378	3522	1.99334	2.20678	2.2347	10.7109	10.4868	9.38253	2.14494	10.1934	2.24863	2.30336e-07	0.000131297	UP	trans	ENSRNOG00000011321	Rftn1	raftlin lipid raft linker 1 [Source:RGD Symbol;Acc:1563347]	9:12740885-12942358	2.16221	2.22146	2.82443	2.01024	1.34943	1.57798	2.4027	1.64588	-0.545795	0.010712	0.213764	-
NONRATT007029.2	11:67650857-67654378	3522	1.99334	2.20678	2.2347	10.7109	10.4868	9.38253	2.14494	10.1934	2.24863	2.30336e-07	0.000131297	UP	trans	ENSRNOG00000002509	Gnl3l	guanine nucleotide binding protein-like 3 (nucleolar)-like [Source:RGD Symbol;Acc:1600217]	X:20034874-20070593	65.0885	65.6931	66.8427	62.7757	62.4846	64.5147	65.8748	63.2583	-0.0584702	0.398726	0.960621	-
NONRATT007029.2	11:67650857-67654378	3522	1.99334	2.20678	2.2347	10.7109	10.4868	9.38253	2.14494	10.1934	2.24863	2.30336e-07	0.000131297	UP	trans	ENSRNOG00000011885	Rhpn2	rhophilin, Rho GTPase binding protein 2 [Source:RGD Symbol;Acc:1308366]	1:91596397-91657395	5.75549	5.52417	4.84504	6.63622	5.80243	6.08516	5.3749	6.1746	0.200108	0.107207	0.65798	-
NONRATT007029.2	11:67650857-67654378	3522	1.99334	2.20678	2.2347	10.7109	10.4868	9.38253	2.14494	10.1934	2.24863	2.30336e-07	0.000131297	UP	trans	ENSRNOG00000016825	Cd3eap	CD3e molecule, epsilon associated protein [Source:RGD Symbol;Acc:1591707]	1:80267725-80271001	1.38244	1.33624	1.37876	0.900937	1.67764	1.13504	1.36581	1.23787	-0.141899	0.609658	1	-
NONRATT007029.2	11:67650857-67654378	3522	1.99334	2.20678	2.2347	10.7109	10.4868	9.38253	2.14494	10.1934	2.24863	2.30336e-07	0.000131297	UP	trans	ENSRNOG00000019653	Csrnp2	cysteine-serine-rich nuclear protein 2 [Source:RGD Symbol;Acc:1308916]	7:142116335-142132173	6.72361	6.38065	7.17679	6.82096	5.91769	6.51108	6.76035	6.41658	-0.0752942	0.501411	0.985627	-
NONRATT007029.2	11:67650857-67654378	3522	1.99334	2.20678	2.2347	10.7109	10.4868	9.38253	2.14494	10.1934	2.24863	2.30336e-07	0.000131297	UP	trans	ENSRNOG00000000308	Zbtb24	zinc finger and BTB domain containing 24 [Source:RGD Symbol;Acc:1306951]	20:46168177-46189806	3.6166	3.52856	3.61026	3.14754	2.77596	3.3675	3.58514	3.097	-0.211157	0.142944	0.726041	-
NONRATT007029.2	11:67650857-67654378	3522	1.99334	2.20678	2.2347	10.7109	10.4868	9.38253	2.14494	10.1934	2.24863	2.30336e-07	0.000131297	UP	trans	ENSRNOG00000002265	Casr	calcium-sensing receptor [Source:RGD Symbol;Acc:2277]	11:67188630-67258771	0.299666	0.546885	0.301965	0.0983286	0.0863142	0.0504637	0.382839	0.0783688	-2.28839	6.04183e-08	1.89656e-05	DOWN
NONRATT007029.2	11:67650857-67654378	3522	1.99334	2.20678	2.2347	10.7109	10.4868	9.38253	2.14494	10.1934	2.24863	2.30336e-07	0.000131297	UP	trans	ENSRNOG00000028814	Oasl2	2'-5' oligoadenylate synthetase-like 2 [Source:RGD Symbol;Acc:1307351]	12:47469598-47482961	2.53069	1.66037	1.66441	2.75877	2.59719	1.26205	1.95182	2.20601	0.176614	0.557153	0.996827	-
NONRATT007029.2	11:67650857-67654378	3522	1.99334	2.20678	2.2347	10.7109	10.4868	9.38253	2.14494	10.1934	2.24863	2.30336e-07	0.000131297	UP	trans	ENSRNOG00000019165	Mrpl51	mitochondrial ribosomal protein L51 [Source:RGD Symbol;Acc:1306686]	4:157705790-157708748	35.6266	32.2592	35.117	35.2039	33.9715	32.9474	34.3342	34.0409	-0.0123784	0.910429	1	-
NONRATT007029.2	11:67650857-67654378	3522	1.99334	2.20678	2.2347	10.7109	10.4868	9.38253	2.14494	10.1934	2.24863	2.30336e-07	0.000131297	UP	trans	ENSRNOG00000051408	Magt1	magnesium transporter 1 [Source:RGD Symbol;Acc:620094]	X:77020402-77061667	8.33701	7.49742	7.14174	8.35872	7.21424	7.23751	7.65872	7.60349	-0.0104418	0.945408	1	-
NONRATT007029.2	11:67650857-67654378	3522	1.99334	2.20678	2.2347	10.7109	10.4868	9.38253	2.14494	10.1934	2.24863	2.30336e-07	0.000131297	UP	trans	ENSRNOG00000048138	Zfp566	zinc finger protein 566 [Source:RGD Symbol;Acc:1563239]	1:88415257-88428685	0.556265	0.586537	0.584736	0.840374	0.289289	0.30444	0.575846	0.478034	-0.26857	0.604988	1	-
NONRATT007029.2	11:67650857-67654378	3522	1.99334	2.20678	2.2347	10.7109	10.4868	9.38253	2.14494	10.1934	2.24863	2.30336e-07	0.000131297	UP	trans	ENSRNOG00000015746	Kcng4	potassium channel, voltage gated modifier subfamily G, member 4 [Source:RGD Symbol;Acc:1308553]	19:52270927-52282877	10.7974	10.5719	12.6103	11.1857	14.8008	14.1628	11.3265	13.3831	0.240706	0.0352623	0.398884	-
NONRATT007029.2	11:67650857-67654378	3522	1.99334	2.20678	2.2347	10.7109	10.4868	9.38253	2.14494	10.1934	2.24863	2.30336e-07	0.000131297	UP	trans	ENSRNOG00000013110	Nudt2	nudix (nucleoside diphosphate linked moiety X)-type motif 2 [Source:RGD Symbol;Acc:1303023]	5:57845819-57860658	26.3149	25.1916	21.5032	23.6321	25.823	26.9118	24.3366	25.4556	0.064858	0.586802	1	-
NONRATT007029.2	11:67650857-67654378	3522	1.99334	2.20678	2.2347	10.7109	10.4868	9.38253	2.14494	10.1934	2.24863	2.30336e-07	0.000131297	UP	trans	ENSRNOG00000014083	Iqsec3	IQ motif and Sec7 domain 3 [Source:RGD Symbol;Acc:1593191]	4:153948055-154044493	26.0454	27.8319	28.3714	25.2738	28.5478	29.6198	27.4162	27.8138	0.0207723	0.758987	1	-
NONRATT007029.2	11:67650857-67654378	3522	1.99334	2.20678	2.2347	10.7109	10.4868	9.38253	2.14494	10.1934	2.24863	2.30336e-07	0.000131297	UP	trans	ENSRNOG00000038365	Plekha2	pleckstrin homology domain-containing, family A (phosphoinositide binding specific) member 2 [Source:RGD Symbol;Acc:1586710]	16:71738718-71787787	3.15558	3.32735	3.14873	3.65094	3.30708	3.03076	3.21055	3.32959	0.0525236	0.663753	1	-
NONRATT007029.2	11:67650857-67654378	3522	1.99334	2.20678	2.2347	10.7109	10.4868	9.38253	2.14494	10.1934	2.24863	2.30336e-07	0.000131297	UP	trans	ENSRNOG00000020377	Cideb	cell death-inducing DFFA-like effector b [Source:RGD Symbol;Acc:1310000]	15:34439876-34444244	0	0	0.0613313	0	0	0.0691881	0.0204438	0.0230627	0.1739	1	1	-
NONRATT007029.2	11:67650857-67654378	3522	1.99334	2.20678	2.2347	10.7109	10.4868	9.38253	2.14494	10.1934	2.24863	2.30336e-07	0.000131297	UP	trans	ENSRNOG00000025895	Sdpr	serum deprivation response [Source:RGD Symbol;Acc:1359345]	9:55243255-55256340	4.93764	4.55885	5.17269	5.31804	5.05924	4.14133	4.88973	4.83954	-0.0148858	0.939023	1	-
NONRATT007029.2	11:67650857-67654378	3522	1.99334	2.20678	2.2347	10.7109	10.4868	9.38253	2.14494	10.1934	2.24863	2.30336e-07	0.000131297	UP	trans	ENSRNOG00000004555	Sec14l4	SEC14-like 4 (S. cerevisiae) [Source:RGD Symbol;Acc:1565810]	14:84274550-84319449	0.0796304	0.0763322	0.0421435	0.0694781	0.0993878	0.0475423	0.0660354	0.0721361	0.127482	0.807951	1	-
NONRATT007029.2	11:67650857-67654378	3522	1.99334	2.20678	2.2347	10.7109	10.4868	9.38253	2.14494	10.1934	2.24863	2.30336e-07	0.000131297	UP	trans	ENSRNOG00000011228	Layn	layilin [Source:RGD Symbol;Acc:1564444]	8:55447709-55467688	0.729149	0.73134	0.897365	0.948273	1.68705	0.759266	0.785951	1.13153	0.525761	0.0755902	0.569909	-
NONRATT007029.2	11:67650857-67654378	3522	1.99334	2.20678	2.2347	10.7109	10.4868	9.38253	2.14494	10.1934	2.24863	2.30336e-07	0.000131297	UP	trans	ENSRNOG00000026110	Scml4	sex comb on midleg-like 4 (Drosophila) [Source:RGD Symbol;Acc:1310898]	20:47596575-47689245	0.474863	1.25894	0.434454	0.564278	0.440313	0.401018	0.722751	0.468536	-0.625337	0.113255	0.676248	-
NONRATT007029.2	11:67650857-67654378	3522	1.99334	2.20678	2.2347	10.7109	10.4868	9.38253	2.14494	10.1934	2.24863	2.30336e-07	0.000131297	UP	trans	ENSRNOG00000026702	Amica1	adhesion molecule, interacts with CXADR antigen 1 [Source:RGD Symbol;Acc:1562572]	8:49378644-49410088	0.116849	0.338783	0.226735	0.342654	0.145831	0.191836	0.227455	0.226773	-0.0043324	1	1	-
NONRATT007029.2	11:67650857-67654378	3522	1.99334	2.20678	2.2347	10.7109	10.4868	9.38253	2.14494	10.1934	2.24863	2.30336e-07	0.000131297	UP	trans	ENSRNOG00000002254	Tmem33	transmembrane protein 33 [Source:RGD Symbol;Acc:708371]	14:42535701-42560174	45.8101	47.6765	45.654	47.1901	43.9736	45.8183	46.3802	45.6607	-0.0225573	0.779822	1	-
NONRATT007029.2	11:67650857-67654378	3522	1.99334	2.20678	2.2347	10.7109	10.4868	9.38253	2.14494	10.1934	2.24863	2.30336e-07	0.000131297	UP	trans	ENSRNOG00000012358	Pcyt1b	phosphate cytidylyltransferase 1, choline, beta [Source:RGD Symbol;Acc:708434]	X:62727755-62818522	15.1368	13.9657	13.1262	13.4922	14.981	13.9426	14.0763	14.1386	0.0063715	0.935833	1	-
NONRATT007029.2	11:67650857-67654378	3522	1.99334	2.20678	2.2347	10.7109	10.4868	9.38253	2.14494	10.1934	2.24863	2.30336e-07	0.000131297	UP	trans	ENSRNOG00000009250	Pts	6-pyruvoyl-tetrahydropterin synthase [Source:RGD Symbol;Acc:68367]	8:54954226-54961265	8.50946	10.4795	8.8876	10.8758	6.7296	8.17754	9.29218	8.59431	-0.112634	0.571472	1	-
NONRATT007029.2	11:67650857-67654378	3522	1.99334	2.20678	2.2347	10.7109	10.4868	9.38253	2.14494	10.1934	2.24863	2.30336e-07	0.000131297	UP	trans	ENSRNOG00000011975	Crtc3	CREB regulated transcription coactivator 3 [Source:RGD Symbol;Acc:1309666]	1:142393207-142500383	1.6251	1.48676	1.57693	1.2743	1.46165	1.28193	1.56293	1.33929	-0.222781	0.277047	0.880986	-
NONRATT007029.2	11:67650857-67654378	3522	1.99334	2.20678	2.2347	10.7109	10.4868	9.38253	2.14494	10.1934	2.24863	2.30336e-07	0.000131297	UP	trans	ENSRNOG00000019212	Tpp1	tripeptidyl peptidase I [Source:RGD Symbol;Acc:621296]	1:170588035-170594168	41.3895	40.4989	43.2405	49.7537	47.1093	47.1146	41.7097	47.9925	0.202429	0.0044614	0.127868	-
NONRATT007029.2	11:67650857-67654378	3522	1.99334	2.20678	2.2347	10.7109	10.4868	9.38253	2.14494	10.1934	2.24863	2.30336e-07	0.000131297	UP	trans	ENSRNOG00000006523	Atl2	atlastin GTPase 2 [Source:RGD Symbol;Acc:1305125]	6:2568990-2610437	16.7809	18.3112	19.3652	17.5214	16.7524	18.6994	18.1524	17.6577	-0.039861	0.674999	1	-
NONRATT007029.2	11:67650857-67654378	3522	1.99334	2.20678	2.2347	10.7109	10.4868	9.38253	2.14494	10.1934	2.24863	2.30336e-07	0.000131297	UP	trans	ENSRNOG00000010794	Dennd3	DENN/MADD domain containing 3 [Source:RGD Symbol;Acc:1311559]	7:114724610-114812708	3.52054	3.91362	3.66778	4.3365	4.51351	4.30207	3.70065	4.38403	0.24448	0.0234049	0.330635	-
NONRATT007029.2	11:67650857-67654378	3522	1.99334	2.20678	2.2347	10.7109	10.4868	9.38253	2.14494	10.1934	2.24863	2.30336e-07	0.000131297	UP	trans	ENSRNOG00000049115	Ccr5	chemokine (C-C motif) receptor 5 [Source:RGD Symbol;Acc:620596]	8:133197032-133215614	7.14518	6.12715	8.95916	5.89849	8.05892	6.33758	7.4105	6.765	-0.131481	0.407713	0.963081	-
NONRATT007029.2	11:67650857-67654378	3522	1.99334	2.20678	2.2347	10.7109	10.4868	9.38253	2.14494	10.1934	2.24863	2.30336e-07	0.000131297	UP	trans	ENSRNOG00000042289	Plcxd2	phosphatidylinositol-specific phospholipase C, X domain containing 2 [Source:RGD Symbol;Acc:1563504]	11:57207656-57260568	29.6786	27.9678	28.9465	28.267	28.1878	26.8934	28.8643	27.7827	-0.0551002	0.438553	0.982138	-
NONRATT007029.2	11:67650857-67654378	3522	1.99334	2.20678	2.2347	10.7109	10.4868	9.38253	2.14494	10.1934	2.24863	2.30336e-07	0.000131297	UP	trans	ENSRNOG00000001339	Psmd9	proteasome (prosome, macropain) 26S subunit, non-ATPase, 9 [Source:RGD Symbol;Acc:621110]	12:38786540-38805121	6.47477	5.65857	6.7923	6.09619	6.33434	8.10961	6.30855	6.84671	0.118104	0.499655	0.985627	-
NONRATT007029.2	11:67650857-67654378	3522	1.99334	2.20678	2.2347	10.7109	10.4868	9.38253	2.14494	10.1934	2.24863	2.30336e-07	0.000131297	UP	trans	ENSRNOG00000018901	Rab14	RAB14, member RAS oncogene family [Source:RGD Symbol;Acc:620881]	3:14375249-14386118	62.4143	60.0917	60.9043	62.0196	59.63	54.7878	61.1368	58.8125	-0.0559186	0.507586	0.985627	-
NONRATT007029.2	11:67650857-67654378	3522	1.99334	2.20678	2.2347	10.7109	10.4868	9.38253	2.14494	10.1934	2.24863	2.30336e-07	0.000131297	UP	trans	ENSRNOG00000009599	Rwdd2a	RWD domain containing 2A [Source:RGD Symbol;Acc:1306231]	8:94243372-94246496	1.29445	1.25569	1.75852	1.87737	1.8096	1.58704	1.43622	1.758	0.29166	0.306709	0.89899	-
NONRATT007029.2	11:67650857-67654378	3522	1.99334	2.20678	2.2347	10.7109	10.4868	9.38253	2.14494	10.1934	2.24863	2.30336e-07	0.000131297	UP	trans	ENSRNOG00000032703	Rasgrp3	RAS guanyl releasing protein 3 (calcium and DAG-regulated) [Source:RGD Symbol;Acc:1304612]	6:21072634-21135880	25.0031	25.132	24.6349	22.3965	28.0118	26.6174	24.9233	25.6752	0.0428802	0.606086	1	-
NONRATT007029.2	11:67650857-67654378	3522	1.99334	2.20678	2.2347	10.7109	10.4868	9.38253	2.14494	10.1934	2.24863	2.30336e-07	0.000131297	UP	trans	ENSRNOG00000022893	Rimbp2	RIMS binding protein 2 [Source:RGD Symbol;Acc:708533]	12:31530699-31620760	7.9864	8.17718	8.4482	8.58092	7.9898	8.88344	8.20393	8.48472	0.0485526	0.516097	0.985627	-
NONRATT007029.2	11:67650857-67654378	3522	1.99334	2.20678	2.2347	10.7109	10.4868	9.38253	2.14494	10.1934	2.24863	2.30336e-07	0.000131297	UP	trans	ENSRNOG00000001426	Prkrip1	Prkr interacting protein 1 (IL11 inducible) [Source:RGD Symbol;Acc:1595708]	12:23514981-23535968	8.41608	8.69187	8.85655	8.03257	8.01056	8.51896	8.65483	8.18737	-0.0801069	0.426002	0.973718	-
NONRATT007029.2	11:67650857-67654378	3522	1.99334	2.20678	2.2347	10.7109	10.4868	9.38253	2.14494	10.1934	2.24863	2.30336e-07	0.000131297	UP	trans	ENSRNOG00000020444	Hcn3	hyperpolarization-activated cyclic nucleotide-gated potassium channel 3 [Source:RGD Symbol;Acc:620691]	2:188454853-188471988	5.69248	6.60774	6.19944	6.37026	5.855	6.25831	6.16655	6.16119	-0.0012537	0.983388	1	-
NONRATT007029.2	11:67650857-67654378	3522	1.99334	2.20678	2.2347	10.7109	10.4868	9.38253	2.14494	10.1934	2.24863	2.30336e-07	0.000131297	UP	trans	ENSRNOG00000001050	Eif2ak1	eukaryotic translation initiation factor 2 alpha kinase 1 [Source:RGD Symbol;Acc:70883]	12:12749037-12782146	23.7373	26.6857	22.8644	24.4766	26.2881	24.8388	24.4291	25.2012	0.0448869	0.587565	1	-
NONRATT007029.2	11:67650857-67654378	3522	1.99334	2.20678	2.2347	10.7109	10.4868	9.38253	2.14494	10.1934	2.24863	2.30336e-07	0.000131297	UP	trans	ENSRNOG00000019817	Ddx28	DEAD (Asp-Glu-Ala-Asp) box polypeptide 28 [Source:RGD Symbol;Acc:1311976]	19:37988423-37990353	4.66542	4.91938	4.56655	4.97535	5.01314	4.84082	4.71712	4.9431	0.0675116	0.666223	1	-
NONRATT007029.2	11:67650857-67654378	3522	1.99334	2.20678	2.2347	10.7109	10.4868	9.38253	2.14494	10.1934	2.24863	2.30336e-07	0.000131297	UP	trans	ENSRNOG00000011560	Mtmr9	myotubularin related protein 9 [Source:RGD Symbol;Acc:628840]	15:46693383-46719252	29.0987	30.8055	30.9244	29.5686	29.9549	31.1884	30.2762	30.2373	-0.00185546	0.982641	1	-
NONRATT007029.2	11:67650857-67654378	3522	1.99334	2.20678	2.2347	10.7109	10.4868	9.38253	2.14494	10.1934	2.24863	2.30336e-07	0.000131297	UP	trans	ENSRNOG00000038445	Rnf225	ring finger protein 225 [Source:RGD Symbol;Acc:1561909]	1:65657276-65659945	0	0.0722574	0.0332681	0.255812	0	0.150045	0.0351751	0.135286	1.94338	0.108207	0.662508	-
NONRATT007029.2	11:67650857-67654378	3522	1.99334	2.20678	2.2347	10.7109	10.4868	9.38253	2.14494	10.1934	2.24863	2.30336e-07	0.000131297	UP	trans	ENSRNOG00000047867	Klhdc8b	kelch domain containing 8B [Source:RGD Symbol;Acc:1359445]	8:117231769-117237229	5.75301	6.77604	6.68118	6.68997	6.95167	5.35984	6.40341	6.33383	-0.0157631	0.928919	1	-
NONRATT007029.2	11:67650857-67654378	3522	1.99334	2.20678	2.2347	10.7109	10.4868	9.38253	2.14494	10.1934	2.24863	2.30336e-07	0.000131297	UP	trans	ENSRNOG00000018574	Qsox2	quiescin Q6 sulfhydryl oxidase 2 [Source:RGD Symbol;Acc:1584720]	3:3662324-3691972	5.98444	6.39934	7.03741	6.5082	5.48623	6.14406	6.47373	6.04616	-0.0985777	0.401473	0.960761	-
NONRATT007029.2	11:67650857-67654378	3522	1.99334	2.20678	2.2347	10.7109	10.4868	9.38253	2.14494	10.1934	2.24863	2.30336e-07	0.000131297	UP	trans	ENSRNOG00000013171	Grm2	glutamate receptor, metabotropic 2 [Source:RGD Symbol;Acc:2743]	8:115344999-115358046	2.37753	2.70533	2.48965	2.88204	2.26306	2.78993	2.52417	2.64501	0.0674645	0.633104	1	-
NONRATT007029.2	11:67650857-67654378	3522	1.99334	2.20678	2.2347	10.7109	10.4868	9.38253	2.14494	10.1934	2.24863	2.30336e-07	0.000131297	UP	trans	ENSRNOG00000022939	Gpkow	G patch domain and KOW motifs [Source:RGD Symbol;Acc:1583600]	X:15636563-15651332	12.358	11.8443	11.0129	11.4411	10.9211	10.4489	11.7384	10.937	-0.102012	0.278747	0.88166	-
NONRATT007029.2	11:67650857-67654378	3522	1.99334	2.20678	2.2347	10.7109	10.4868	9.38253	2.14494	10.1934	2.24863	2.30336e-07	0.000131297	UP	trans	ENSRNOG00000014628	Pomk	protein-O-mannose kinase [Source:RGD Symbol;Acc:1310810]	16:70859280-70869634	17.8493	18.7362	18.7247	19.2637	17.0607	15.4323	18.4367	17.2523	-0.0957995	0.329812	0.914238	-
NONRATT007029.2	11:67650857-67654378	3522	1.99334	2.20678	2.2347	10.7109	10.4868	9.38253	2.14494	10.1934	2.24863	2.30336e-07	0.000131297	UP	trans	ENSRNOG00000014331	Zfp717	zinc finger protein 717 [Source:RGD Symbol;Acc:2319964]	8:23275936-23282989	24.9706	25.1254	24.2306	24.1931	24.5142	25.7777	24.7755	24.8283	0.00307145	0.933549	1	-
NONRATT007029.2	11:67650857-67654378	3522	1.99334	2.20678	2.2347	10.7109	10.4868	9.38253	2.14494	10.1934	2.24863	2.30336e-07	0.000131297	UP	trans	ENSRNOG00000022268	Pnpla3	patatin-like phospholipase domain containing 3 [Source:RGD Symbol;Acc:1595843]	7:125034764-125055976	2.4123	2.49223	3.33389	3.06627	3.34555	2.13395	2.74614	2.84859	0.0528437	0.807943	1	-
NONRATT007029.2	11:67650857-67654378	3522	1.99334	2.20678	2.2347	10.7109	10.4868	9.38253	2.14494	10.1934	2.24863	2.30336e-07	0.000131297	UP	trans	ENSRNOG00000009620	Cybrd1	cytochrome b reductase 1 [Source:RGD Symbol;Acc:1305740]	3:57718364-57746097	1.60488	2.11532	1.53786	2.18217	1.27704	1.18588	1.75269	1.54837	-0.178824	0.492432	0.985627	-
NONRATT007029.2	11:67650857-67654378	3522	1.99334	2.20678	2.2347	10.7109	10.4868	9.38253	2.14494	10.1934	2.24863	2.30336e-07	0.000131297	UP	trans	ENSRNOG00000010572	Pus7	pseudouridylate synthase 7 [Source:RGD Symbol;Acc:1307054]	4:7889869-7930706	6.1217	5.51361	6.18782	6.6644	5.45222	6.21281	5.94104	6.10981	0.0404112	0.743741	1	-
NONRATT007029.2	11:67650857-67654378	3522	1.99334	2.20678	2.2347	10.7109	10.4868	9.38253	2.14494	10.1934	2.24863	2.30336e-07	0.000131297	UP	trans	ENSRNOG00000016448	Eef2k	eukaryotic elongation factor-2 kinase [Source:RGD Symbol;Acc:2538]	1:190780236-190842324	12.0769	12.2489	12.2253	11.75	11.2243	12.3135	12.1837	11.7626	-0.0507453	0.57417	1	-
NONRATT007029.2	11:67650857-67654378	3522	1.99334	2.20678	2.2347	10.7109	10.4868	9.38253	2.14494	10.1934	2.24863	2.30336e-07	0.000131297	UP	trans	ENSRNOG00000009076	Ttpal	tocopherol (alpha) transfer protein-like [Source:RGD Symbol;Acc:1305754]	3:159995064-160013274	11.7373	12.6615	12.1279	13.9058	13.5104	12.8488	12.1756	13.4217	0.140573	0.0763548	0.573487	-
NONRATT007029.2	11:67650857-67654378	3522	1.99334	2.20678	2.2347	10.7109	10.4868	9.38253	2.14494	10.1934	2.24863	2.30336e-07	0.000131297	UP	trans	ENSRNOG00000025408	Duxbl1	double homeobox B-like 1 [Source:RGD Symbol;Acc:1311053]	16:3754968-3765917	2.57842	2.11906	2.55722	1.77924	2.86339	2.44904	2.41823	2.36389	-0.0327924	0.880178	1	-
NONRATT007029.2	11:67650857-67654378	3522	1.99334	2.20678	2.2347	10.7109	10.4868	9.38253	2.14494	10.1934	2.24863	2.30336e-07	0.000131297	UP	trans	ENSRNOG00000005749	Foxred2	FAD-dependent oxidoreductase domain containing 2 [Source:RGD Symbol;Acc:1306763]	7:119170181-119185238	4.72472	4.92833	4.74901	5.27335	5.07298	4.28232	4.80069	4.87622	0.0225213	0.841338	1	-
NONRATT007029.2	11:67650857-67654378	3522	1.99334	2.20678	2.2347	10.7109	10.4868	9.38253	2.14494	10.1934	2.24863	2.30336e-07	0.000131297	UP	trans	ENSRNOG00000020167	Reep5	receptor accessory protein 5 [Source:RGD Symbol;Acc:1306047]	18:27128464-27159693	194.712	189.332	189.256	176.276	176.411	171.131	191.1	174.606	-0.130228	0.0410653	0.428779	-
NONRATT007029.2	11:67650857-67654378	3522	1.99334	2.20678	2.2347	10.7109	10.4868	9.38253	2.14494	10.1934	2.24863	2.30336e-07	0.000131297	UP	trans	ENSRNOG00000038720	Cdkl1	cyclin-dependent kinase-like 1 (CDC2-related kinase) [Source:RGD Symbol;Acc:1305080]	6:92077416-92121351	15.1806	15.8234	14.4774	16.1427	16.8851	15.7135	15.1605	16.2471	0.0998636	0.320036	0.909036	-
NONRATT007029.2	11:67650857-67654378	3522	1.99334	2.20678	2.2347	10.7109	10.4868	9.38253	2.14494	10.1934	2.24863	2.30336e-07	0.000131297	UP	trans	ENSRNOG00000048861	LOC498122	similar to CG15908-PA [Source:RGD Symbol;Acc:1595717]	11:86299210-86303453	8.96085	10.2022	9.12204	7.15248	7.61665	7.2819	9.42837	7.35034	-0.359197	0.0117197	0.225896	-
NONRATT007029.2	11:67650857-67654378	3522	1.99334	2.20678	2.2347	10.7109	10.4868	9.38253	2.14494	10.1934	2.24863	2.30336e-07	0.000131297	UP	trans	ENSRNOG00000014218	Tmem25	transmembrane protein 25 [Source:RGD Symbol;Acc:1596132]	8:49100759-49106177	14.0695	16.2669	15.4789	16.2216	18.0235	16.5503	15.2717	16.9318	0.148871	0.11626	0.684883	-
NONRATT007029.2	11:67650857-67654378	3522	1.99334	2.20678	2.2347	10.7109	10.4868	9.38253	2.14494	10.1934	2.24863	2.30336e-07	0.000131297	UP	trans	ENSRNOG00000008064	Naga	N-acetyl galactosaminidase, alpha [Source:RGD Symbol;Acc:1306025]	7:123563059-123572082	15.7269	17.7536	16.374	15.3905	18.7064	17.6214	16.6182	17.2395	0.0529513	0.606462	1	-
NONRATT007029.2	11:67650857-67654378	3522	1.99334	2.20678	2.2347	10.7109	10.4868	9.38253	2.14494	10.1934	2.24863	2.30336e-07	0.000131297	UP	trans	ENSRNOG00000000230	Lmf1	lipase maturation factor 1 [Source:RGD Symbol;Acc:1310180]	10:14945265-15031942	7.2603	6.85167	6.37586	7.27808	6.75137	7.07362	6.82928	7.03436	0.0426853	0.718294	1	-
NONRATT007029.2	11:67650857-67654378	3522	1.99334	2.20678	2.2347	10.7109	10.4868	9.38253	2.14494	10.1934	2.24863	2.30336e-07	0.000131297	UP	trans	ENSRNOG00000029115	RGD1564883	similar to 60S ribosomal protein L12 [Source:RGD Symbol;Acc:1564883]	7:59762502-59763219	1.09102	0.575198	0.846939	0.581728	1.08947	1.07493	0.83772	0.915373	0.127892	1	1	-
NONRATT007029.2	11:67650857-67654378	3522	1.99334	2.20678	2.2347	10.7109	10.4868	9.38253	2.14494	10.1934	2.24863	2.30336e-07	0.000131297	UP	trans	ENSRNOG00000018009	Rab8b	RAB8B, member RAS oncogene family [Source:RGD Symbol;Acc:628764]	8:72638003-72714664	13.6973	14.2187	14.3575	13.4923	13.5359	13.3651	14.0912	13.4644	-0.0656364	0.440196	0.982713	-
NONRATT007029.2	11:67650857-67654378	3522	1.99334	2.20678	2.2347	10.7109	10.4868	9.38253	2.14494	10.1934	2.24863	2.30336e-07	0.000131297	UP	trans	ENSRNOG00000011663	Rnf7	ring finger protein 7 [Source:RGD Symbol;Acc:1311048]	8:104326719-104335729	4.80262	4.86677	5.44708	5.78683	3.81473	4.30155	5.03882	4.63437	-0.120713	0.571547	1	-
NONRATT007029.2	11:67650857-67654378	3522	1.99334	2.20678	2.2347	10.7109	10.4868	9.38253	2.14494	10.1934	2.24863	2.30336e-07	0.000131297	UP	trans	ENSRNOG00000000841	Ddx39b	DEAD (Asp-Glu-Ala-Asp) box polypeptide 39B [Source:RGD Symbol;Acc:70923]	20:4806108-4818568	53.0859	55.0365	55.834	57.1573	57.1714	56.5934	54.6522	56.974	0.0600258	0.325089	0.912849	-
NONRATT007029.2	11:67650857-67654378	3522	1.99334	2.20678	2.2347	10.7109	10.4868	9.38253	2.14494	10.1934	2.24863	2.30336e-07	0.000131297	UP	trans	ENSRNOG00000020076	RGD1311783	similar to RIKEN cDNA 2010012O05 [Source:RGD Symbol;Acc:1311783]	1:266451021-266464903	24.3713	27.2004	25.5636	20.7688	21.2073	23.6393	25.7118	21.8718	-0.233356	0.0123201	0.232149	-
NONRATT007029.2	11:67650857-67654378	3522	1.99334	2.20678	2.2347	10.7109	10.4868	9.38253	2.14494	10.1934	2.24863	2.30336e-07	0.000131297	UP	trans	ENSRNOG00000060320	Lin28a	Protein Lin28a; RCG30757 [Source:UniProtKB/TrEMBL;Acc:D3ZZA6]	5:152230343-152247332	0.0667565	0.0234749	0	0	0	0.0487219	0.0300771	0.0162406	-0.889059	0.709088	1	-
NONRATT007029.2	11:67650857-67654378	3522	1.99334	2.20678	2.2347	10.7109	10.4868	9.38253	2.14494	10.1934	2.24863	2.30336e-07	0.000131297	UP	trans	ENSRNOG00000042427	Gskip	GSK3B interacting protein [Source:RGD Symbol;Acc:1308470]	6:129519709-129536221	13.1659	11.9213	12.8465	12.7181	13.0193	12.4165	12.6445	12.718	0.00835538	0.9268	1	-
NONRATT007029.2	11:67650857-67654378	3522	1.99334	2.20678	2.2347	10.7109	10.4868	9.38253	2.14494	10.1934	2.24863	2.30336e-07	0.000131297	UP	trans	ENSRNOG00000021719	Slfn5	schlafen family member 5 [Source:RGD Symbol;Acc:1312025]	10:70298519-70312070	7.04168	7.51236	6.60188	5.75358	5.71308	4.98788	7.05197	5.48485	-0.362575	0.000151012	0.0123918	-
NONRATT007029.2	11:67650857-67654378	3522	1.99334	2.20678	2.2347	10.7109	10.4868	9.38253	2.14494	10.1934	2.24863	2.30336e-07	0.000131297	UP	trans	ENSRNOG00000011820	Acpp	acid phosphatase, prostate [Source:RGD Symbol;Acc:2023]	8:112834707-112884077	0.148196	0.170464	0.0522874	0.114934	0.168151	0.132725	0.123649	0.138603	0.164708	0.81647	1	-
NONRATT007029.2	11:67650857-67654378	3522	1.99334	2.20678	2.2347	10.7109	10.4868	9.38253	2.14494	10.1934	2.24863	2.30336e-07	0.000131297	UP	trans	ENSRNOG00000007887	Elk4	ELK4, ETS-domain protein (SRF accessory protein 1) [Source:RGD Symbol;Acc:1310504]	13:48790509-48813260	9.44146	9.73882	1.42175	8.01697	8.92186	1.42405	6.86734	6.12096	-0.165994	0.767029	1	-
NONRATT007029.2	11:67650857-67654378	3522	1.99334	2.20678	2.2347	10.7109	10.4868	9.38253	2.14494	10.1934	2.24863	2.30336e-07	0.000131297	UP	trans	ENSRNOG00000013610	Chrna5	cholinergic receptor, nicotinic, alpha 5 (neuronal) [Source:RGD Symbol;Acc:2347]	8:59561817-59590172	4.73438	4.09425	6.2301	7.44621	4.61273	1.28636	5.01957	4.44843	-0.174267	0.658087	1	-
NONRATT007029.2	11:67650857-67654378	3522	1.99334	2.20678	2.2347	10.7109	10.4868	9.38253	2.14494	10.1934	2.24863	2.30336e-07	0.000131297	UP	trans	ENSRNOG00000039829	Rpp14	ribonuclease P/MRP 14 subunit [Source:RGD Symbol;Acc:1305436]	15:18625964-18632536	9.49409	11.724	10.74	10.9369	11.1533	10.3932	10.6527	10.8278	0.0235252	0.848917	1	-
NONRATT007029.2	11:67650857-67654378	3522	1.99334	2.20678	2.2347	10.7109	10.4868	9.38253	2.14494	10.1934	2.24863	2.30336e-07	0.000131297	UP	trans	ENSRNOG00000027091	Kctd18	potassium channel tetramerization domain containing 18 [Source:RGD Symbol;Acc:1564820]	9:64852301-64916652	5.03142	5.86523	4.47009	4.77105	5.65049	5.17366	5.12224	5.1984	0.0212909	0.849128	1	-
NONRATT007029.2	11:67650857-67654378	3522	1.99334	2.20678	2.2347	10.7109	10.4868	9.38253	2.14494	10.1934	2.24863	2.30336e-07	0.000131297	UP	trans	ENSRNOG00000055408	Gcat	glycine C-acetyltransferase [Source:RGD Symbol;Acc:1307291]	7:120263054-120269451	3.39087	3.20737	2.90324	3.45657	3.17432	3.38444	3.16716	3.33844	0.0759839	0.707225	1	-
NONRATT007029.2	11:67650857-67654378	3522	1.99334	2.20678	2.2347	10.7109	10.4868	9.38253	2.14494	10.1934	2.24863	2.30336e-07	0.000131297	UP	trans	ENSRNOG00000052061	Ppef2	protein phosphatase, EF hand calcium-binding domain 2 [Source:RGD Symbol;Acc:1307093]	14:17306825-17333588	1.9407	2.19046	1.51186	1.48663	2.08118	2.48355	1.88101	2.01712	0.100793	0.688321	1	-
NONRATT007029.2	11:67650857-67654378	3522	1.99334	2.20678	2.2347	10.7109	10.4868	9.38253	2.14494	10.1934	2.24863	2.30336e-07	0.000131297	UP	trans	ENSRNOG00000049137	Zfp35	zinc finger protein 35 [Source:RGD Symbol;Acc:1312031]	18:15883182-15898821	4.87088	5.13602	4.97377	4.76293	4.58322	5.00403	4.99356	4.78339	-0.0620331	0.597639	1	-
NONRATT007029.2	11:67650857-67654378	3522	1.99334	2.20678	2.2347	10.7109	10.4868	9.38253	2.14494	10.1934	2.24863	2.30336e-07	0.000131297	UP	trans	ENSRNOG00000008022	Apaf1	apoptotic peptidase activating factor 1 [Source:RGD Symbol;Acc:620575]	7:31699885-31784192	4.34145	5.05181	4.87337	4.69834	4.40891	4.71041	4.75554	4.60589	-0.0461307	0.70165	1	-
NONRATT007029.2	11:67650857-67654378	3522	1.99334	2.20678	2.2347	10.7109	10.4868	9.38253	2.14494	10.1934	2.24863	2.30336e-07	0.000131297	UP	trans	ENSRNOG00000036699	RGD1306926	similar to hypothetical protein FLJ22175 [Source:RGD Symbol;Acc:1306926]	10:109539548-109551362	4.08478	4.22882	4.15111	4.46704	3.912	3.60981	4.15491	3.99628	-0.0561578	0.667995	1	-
NONRATT007029.2	11:67650857-67654378	3522	1.99334	2.20678	2.2347	10.7109	10.4868	9.38253	2.14494	10.1934	2.24863	2.30336e-07	0.000131297	UP	trans	ENSRNOG00000036866	Acer3	alkaline ceramidase 3 [Source:RGD Symbol;Acc:1561254]	1:163160979-163263606	16.6519	15.625	15.8679	14.2464	14.1756	14.747	16.0483	14.3897	-0.157384	0.0574496	0.502265	-
NONRATT007029.2	11:67650857-67654378	3522	1.99334	2.20678	2.2347	10.7109	10.4868	9.38253	2.14494	10.1934	2.24863	2.30336e-07	0.000131297	UP	trans	ENSRNOG00000005491	Best3	bestrophin 3 [Source:RGD Symbol;Acc:1305439]	7:60015998-60057152	0.634525	0.250906	0.333515	1.07141	0.825038	0.607792	0.406315	0.834747	1.03874	0.00489818	0.136817	-
NONRATT007029.2	11:67650857-67654378	3522	1.99334	2.20678	2.2347	10.7109	10.4868	9.38253	2.14494	10.1934	2.24863	2.30336e-07	0.000131297	UP	trans	ENSRNOG00000010071	RGD1560010	RGD1560010 [Source:RGD Symbol;Acc:1560010]	2:178389799-178393113	1.45671	1.10934	1.76692	1.89871	1.06063	1.06311	1.44432	1.34082	-0.107281	0.760176	1	-
NONRATT007029.2	11:67650857-67654378	3522	1.99334	2.20678	2.2347	10.7109	10.4868	9.38253	2.14494	10.1934	2.24863	2.30336e-07	0.000131297	UP	trans	ENSRNOG00000007629	Sf3a3	splicing factor 3a, subunit 3 [Source:RGD Symbol;Acc:1308726]	5:142702685-142722341	12.8863	13.9107	13.0244	11.2933	12.9951	12.5424	13.2738	12.2769	-0.112636	0.261197	0.866649	-
NONRATT007029.2	11:67650857-67654378	3522	1.99334	2.20678	2.2347	10.7109	10.4868	9.38253	2.14494	10.1934	2.24863	2.30336e-07	0.000131297	UP	trans	ENSRNOG00000001427	Orai2	ORAI calcium release-activated calcium modulator 2 [Source:RGD Symbol;Acc:1310213]	12:23544287-23564569	10.7367	12.9104	9.35318	13.5336	9.73169	16.6219	11.0001	13.2957	0.273446	0.0890099	0.611626	-
NONRATT007029.2	11:67650857-67654378	3522	1.99334	2.20678	2.2347	10.7109	10.4868	9.38253	2.14494	10.1934	2.24863	2.30336e-07	0.000131297	UP	trans	ENSRNOG00000025360	Exd1	exonuclease 3'-5' domain containing 1 [Source:RGD Symbol;Acc:1561009]	3:111326480-111354419	0.433322	0.456891	0.46474	0.340487	0.313122	0.29959	0.451651	0.317733	-0.507393	0.138253	0.719122	-
NONRATT007029.2	11:67650857-67654378	3522	1.99334	2.20678	2.2347	10.7109	10.4868	9.38253	2.14494	10.1934	2.24863	2.30336e-07	0.000131297	UP	trans	ENSRNOG00000029466	RGD1562608	similar to KIAA1328 protein [Source:RGD Symbol;Acc:1562608]	18:17403407-17676049	5.54474	4.75035	6.35189	6.01574	5.71935	5.90123	5.549	5.87877	0.0832887	0.495929	0.985627	-
NONRATT007029.2	11:67650857-67654378	3522	1.99334	2.20678	2.2347	10.7109	10.4868	9.38253	2.14494	10.1934	2.24863	2.30336e-07	0.000131297	UP	trans	ENSRNOG00000017975	Dnajb13	DnaJ (Hsp40) homolog, subfamily B, member 13 [Source:RGD Symbol;Acc:1359131]	1:165515726-165530095	0.382495	0.439968	0.539849	0.185389	0.347198	0.304523	0.454104	0.279036	-0.702569	0.127658	0.704958	-
NONRATT007029.2	11:67650857-67654378	3522	1.99334	2.20678	2.2347	10.7109	10.4868	9.38253	2.14494	10.1934	2.24863	2.30336e-07	0.000131297	UP	trans	ENSRNOG00000019830	Hsd17b1	hydroxysteroid (17-beta) dehydrogenase 1 [Source:RGD Symbol;Acc:2836]	10:88987558-88989757	0.441027	0.406935	0.534978	0.47033	0.412862	0.784577	0.46098	0.555923	0.270181	0.612503	1	-
NONRATT007029.2	11:67650857-67654378	3522	1.99334	2.20678	2.2347	10.7109	10.4868	9.38253	2.14494	10.1934	2.24863	2.30336e-07	0.000131297	UP	trans	ENSRNOG00000018330	Fam83f	family with sequence similarity 83, member F [Source:RGD Symbol;Acc:1562089]	7:121889157-121918772	0.767519	0.485588	0.546165	0.572973	0.415132	0.840198	0.599757	0.609434	0.023092	1	1	-
NONRATT007029.2	11:67650857-67654378	3522	1.99334	2.20678	2.2347	10.7109	10.4868	9.38253	2.14494	10.1934	2.24863	2.30336e-07	0.000131297	UP	trans	ENSRNOG00000000417	Numa1	nuclear mitotic apparatus protein 1 [Source:RGD Symbol;Acc:1308777]	1:167051209-167091453	25.4276	25.7331	24.5977	26.2881	25.7346	25.1113	25.2528	25.7113	0.0259608	0.663994	1	-
NONRATT007029.2	11:67650857-67654378	3522	1.99334	2.20678	2.2347	10.7109	10.4868	9.38253	2.14494	10.1934	2.24863	2.30336e-07	0.000131297	UP	trans	ENSRNOG00000001161	Gatc	glutamyl-tRNA(Gln) amidotransferase, subunit C [Source:RGD Symbol;Acc:1309698]	12:46989951-47039542	11.9534	10.2778	12.8447	10.5659	12.1163	11.3729	11.6919	11.3517	-0.0426089	0.747378	1	-
NONRATT007029.2	11:67650857-67654378	3522	1.99334	2.20678	2.2347	10.7109	10.4868	9.38253	2.14494	10.1934	2.24863	2.30336e-07	0.000131297	UP	trans	ENSRNOG00000005193	Pfas	phosphoribosylformylglycinamidine synthase [Source:RGD Symbol;Acc:1304926]	10:55571118-55589978	9.72777	9.6219	10.4326	11.1799	11.1512	11.0155	9.92744	11.1155	0.163081	0.0283876	0.364304	-
NONRATT007029.2	11:67650857-67654378	3522	1.99334	2.20678	2.2347	10.7109	10.4868	9.38253	2.14494	10.1934	2.24863	2.30336e-07	0.000131297	UP	trans	ENSRNOG00000050828	Vkorc1	vitamin K epoxide reductase complex, subunit 1 [Source:RGD Symbol;Acc:1303107]	1:199337138-199341302	4.20434	3.60197	4.07973	3.74804	4.26384	4.02718	3.96201	4.01302	0.0184545	0.913292	1	-
NONRATT007029.2	11:67650857-67654378	3522	1.99334	2.20678	2.2347	10.7109	10.4868	9.38253	2.14494	10.1934	2.24863	2.30336e-07	0.000131297	UP	trans	ENSRNOG00000011071	Nt5e	5' nucleotidase, ecto [Source:RGD Symbol;Acc:61956]	8:95968652-96012696	7.28731	6.68404	8.96028	10.8055	8.62871	11.8296	7.64388	10.4213	0.447152	0.001417	0.0596227	-
NONRATT007029.2	11:67650857-67654378	3522	1.99334	2.20678	2.2347	10.7109	10.4868	9.38253	2.14494	10.1934	2.24863	2.30336e-07	0.000131297	UP	trans	ENSRNOG00000018144	Depdc5	DEP domain containing 5 [Source:RGD Symbol;Acc:1311535]	14:83089000-83219464	11.3777	11.5172	11.9654	12.2709	12.3687	11.3366	11.6201	11.9921	0.0454581	0.513014	0.985627	-
NONRATT007029.2	11:67650857-67654378	3522	1.99334	2.20678	2.2347	10.7109	10.4868	9.38253	2.14494	10.1934	2.24863	2.30336e-07	0.000131297	UP	trans	ENSRNOG00000002255	Fam162a	family with sequence similarity 162, member A [Source:RGD Symbol;Acc:1590883]	11:67618625-67646253	18.7371	19.9922	17.316	18.1739	18.7099	18.1185	18.6818	18.3341	-0.0270997	0.822931	1	-
NONRATT007029.2	11:67650857-67654378	3522	1.99334	2.20678	2.2347	10.7109	10.4868	9.38253	2.14494	10.1934	2.24863	2.30336e-07	0.000131297	UP	trans	ENSRNOG00000006462	Ero1l	ERO1-like (S. cerevisiae) [Source:RGD Symbol;Acc:621713]	15:19619973-19655381	54.498	53.7115	54.3166	58.4765	54.2346	58.2622	54.1754	56.9911	0.0730999	0.284518	0.888216	-
NONRATT007029.2	11:67650857-67654378	3522	1.99334	2.20678	2.2347	10.7109	10.4868	9.38253	2.14494	10.1934	2.24863	2.30336e-07	0.000131297	UP	trans	ENSRNOG00000019044	Adam30	ADAM metallopeptidase domain 30 [Source:RGD Symbol;Acc:1594713]	2:200328498-200331938	0.022763	0.0240138	0	0.0971263	0.0568321	0	0.0155923	0.0513194	1.71867	0.319252	0.90891	-
NONRATT007029.2	11:67650857-67654378	3522	1.99334	2.20678	2.2347	10.7109	10.4868	9.38253	2.14494	10.1934	2.24863	2.30336e-07	0.000131297	UP	trans	ENSRNOG00000052023	AABR07002885.1	-	1:88374496-88387424	0.0692348	0.219044	0.223985	0.3446	0.115238	0.17687	0.170754	0.212236	0.313746	0.635619	1	-
NONRATT007029.2	11:67650857-67654378	3522	1.99334	2.20678	2.2347	10.7109	10.4868	9.38253	2.14494	10.1934	2.24863	2.30336e-07	0.000131297	UP	trans	ENSRNOG00000025222	Pcid2	PCI domain containing 2 [Source:RGD Symbol;Acc:1307041]	16:81757582-81783047	16.8673	17.4012	17.8467	16.3976	17.3723	18.9001	17.3717	17.5567	0.0152772	0.848243	1	-
NONRATT007029.2	11:67650857-67654378	3522	1.99334	2.20678	2.2347	10.7109	10.4868	9.38253	2.14494	10.1934	2.24863	2.30336e-07	0.000131297	UP	trans	ENSRNOG00000052506	Ak3	adenylate kinase 3 [Source:RGD Symbol;Acc:619885]	1:247144491-247169693	27.4	26.386	26.0115	25.34	28.2686	24.3047	26.5992	25.9711	-0.034473	0.770267	1	-
NONRATT007029.2	11:67650857-67654378	3522	1.99334	2.20678	2.2347	10.7109	10.4868	9.38253	2.14494	10.1934	2.24863	2.30336e-07	0.000131297	UP	trans	ENSRNOG00000025736	Tcf23	transcription factor 23 [Source:RGD Symbol;Acc:1586500]	6:26762761-26771164	0.122241	0.110482	0.0677778	0.0931076	0.0871864	0.0955852	0.100167	0.0919597	-0.123332	1	1	-
NONRATT007029.2	11:67650857-67654378	3522	1.99334	2.20678	2.2347	10.7109	10.4868	9.38253	2.14494	10.1934	2.24863	2.30336e-07	0.000131297	UP	trans	ENSRNOG00000039859	Dnmt1	DNA (cytosine-5-)-methyltransferase 1 [Source:RGD Symbol;Acc:620979]	8:21922515-21968495	8.43486	8.64695	9.02611	8.24561	8.68584	8.33594	8.70264	8.42246	-0.0472107	0.590708	1	-
NONRATT007029.2	11:67650857-67654378	3522	1.99334	2.20678	2.2347	10.7109	10.4868	9.38253	2.14494	10.1934	2.24863	2.30336e-07	0.000131297	UP	trans	ENSRNOG00000003261	Usp9x	ubiquitin specific peptidase 9, X-linked [Source:RGD Symbol;Acc:1560056]	X:10510033-10630297	72.1382	70.374	71.0702	71.3707	70.7492	71.1131	71.1942	71.0777	-0.00236248	0.98844	1	-
NONRATT007029.2	11:67650857-67654378	3522	1.99334	2.20678	2.2347	10.7109	10.4868	9.38253	2.14494	10.1934	2.24863	2.30336e-07	0.000131297	UP	trans	ENSRNOG00000019630	Hacl1	2-hydroxyacyl-CoA lyase 1 [Source:RGD Symbol;Acc:619849]	16:7714465-7758189	4.34244	3.69991	4.43553	3.91406	4.69862	4.70954	4.1593	4.44074	0.0944606	0.431382	0.976985	-
NONRATT007029.2	11:67650857-67654378	3522	1.99334	2.20678	2.2347	10.7109	10.4868	9.38253	2.14494	10.1934	2.24863	2.30336e-07	0.000131297	UP	trans	ENSRNOG00000001187	Oasl	2'-5'-oligoadenylate synthetase-like [Source:RGD Symbol;Acc:1308586]	12:47444104-47456894	0.228057	0.0601093	0.221289	0.030405	0.142328	0.468117	0.169818	0.213617	0.331033	0.75242	1	-
NONRATT018272.2	3:62483767-62487699	1322	0.0515616	0.108856	0.100074	0.328624	0.19312	6.24913	0.0868303	2.25696	4.70004	0.000102727	0.0220259	UP	cis	ENSRNOG00000052968	Hnrnpa3	Heterogeneous nuclear ribonucleoprotein A3 [Source:UniProtKB/Swiss-Prot;Acc:Q6URK4]	3:62481323-62487227	23.9827	26.0128	24.8056	23.0843	24.8743	24.975	24.9337	24.3112	-0.0364745	0.75823	1	-
NONRATT002864.2	1:146757436-146823762	714	1.33646	0.20155	2.22321	0	0.238379	0	1.25374	0.0794598	-3.97987	0.000134271	0.0263277	DOWN	cis	ENSRNOG00000061807	U6	U6 spliceosomal RNA [Source:RFAM;Acc:RF00026]	1:146766548-146766654	0.732034	1.54374	2.13155	1.56174	2.74148	1.60281	1.46911	1.96868	0.422284	1	1	-
NONRATT007039.2	11:69099288-69099674	387	0.352271	0.371853	0.341854	12.7226	6.81713	7.30794	0.355326	8.94924	4.65455	1.02513e-13	2.17803e-10	UP	cis	ENSRNOG00000002215	Mylk	myosin light chain kinase [Source:RGD Symbol;Acc:1310915]	11:69013050-69223158	5.36153	7.16477	8.646	9.74984	9.19694	6.79377	7.05743	8.58018	0.281866	0.0648319	0.537295	-
NONRATT019976.2	3:162688167-162692046	829	0.739942	2.08344	0.478681	0	0	0	1.10069	0	#NAME?	5.57561e-07	0.00027725	DOWN	cis	ENSRNOG00000005616	Ncoa3	nuclear receptor coactivator 3 [Source:RGD Symbol;Acc:620109]	3:162692185-162787548	15.2396	14.8331	16.1233	16.252	15.841	15.3995	15.3987	15.8308	0.0399319	0.589652	1	-
NONRATT009831.2	14:33649530-33651104	1575	0.0865581	18.0484	0.0839985	0.0459495	0.108065	0.141785	6.073	0.0986001	-5.94468	0.00023106	0.0362422	DOWN	cis	ENSRNOG00000002137	Aasdh	aminoadipate-semialdehyde dehydrogenase [Source:RGD Symbol;Acc:1311135]	14:33624390-33647180	8.99709	9.81224	8.56919	10.6581	11.1708	10.083	9.12618	10.6373	0.221048	0.0282649	0.363349	-
NONRATT019577.2	3:107560178-107697642	1858	1.46741	0.154944	2.52738	0.116891	0.0458027	0.0400631	1.38324	0.0675857	-4.35519	2.72654e-06	0.00111793	DOWN	cis	ENSRNOG00000004730	Meis2	Meis homeobox 2 [Source:RGD Symbol;Acc:1305198]	3:107559997-107760589	3.6796	2.63698	2.41128	1.44391	2.78354	1.65656	2.90929	1.96133	-0.56883	0.0166297	0.27544	-
MSTRG.12069.2	17:89388848-89453616	6494	0.860663	0.044331	1.49715	9.59993	8.79335	3.16318	0.800716	7.18548	3.16572	0.000314251	0.0456172	UP	cis	ENSRNOG00000028913	LOC688970	similar to serine/threonine kinase [Source:RGD Symbol;Acc:1582937]	17:89452814-89454038	0	0	0	0	0.208263	0	0	0.0694211	Inf	0.522599	0.985627	-
NONRATT024220.2	6:43799808-43801622	615	0	0	0	0	3.32103	0.726097	0	1.34904	Inf	0.000218215	0.0353463	UP	cis	ENSRNOG00000054989	Grhl1	grainyhead-like 1 (Drosophila) [Source:MGI Symbol;Acc:MGI:2182540]	6:43743702-43794342	3.87963	3.14676	3.28201	4.24342	5.46336	4.1926	3.43614	4.63313	0.4312	0.0256458	0.347954	-
NONRATT015586.2	2:198421226-198422243	1018	2.20952	1.62595	2.27398	0.640103	0.668773	0.511775	2.03648	0.606884	-1.74659	0.000117192	0.0244545	DOWN	trans	ENSRNOG00000045524	Slc39a3	solute carrier family 39 (zinc transporter), member 3 [Source:RGD Symbol;Acc:1310863]	7:11545024-11553370	7.86347	6.2632	7.71249	7.98009	7.51963	6.78008	7.27972	7.4266	0.028819	0.805159	1	-
NONRATT015586.2	2:198421226-198422243	1018	2.20952	1.62595	2.27398	0.640103	0.668773	0.511775	2.03648	0.606884	-1.74659	0.000117192	0.0244545	DOWN	trans	ENSRNOG00000042201	Efcab2	EF-hand calcium binding domain 2 [Source:RGD Symbol;Acc:1308593]	13:96303703-96414404	1.98926	1.77293	1.83839	1.7931	1.53707	2.43689	1.86686	1.92235	0.0422613	0.826364	1	-
NONRATT015586.2	2:198421226-198422243	1018	2.20952	1.62595	2.27398	0.640103	0.668773	0.511775	2.03648	0.606884	-1.74659	0.000117192	0.0244545	DOWN	trans	ENSRNOG00000008065	Wwc1	WW and C2 domain containing 1 [Source:RGD Symbol;Acc:1308329]	10:20663541-20818128	23.1247	23.2384	23.1626	20.3237	22.2726	22.1445	23.1753	21.5803	-0.102871	0.203976	0.820385	-
NONRATT015586.2	2:198421226-198422243	1018	2.20952	1.62595	2.27398	0.640103	0.668773	0.511775	2.03648	0.606884	-1.74659	0.000117192	0.0244545	DOWN	trans	ENSRNOG00000007262	Ccdc134	coiled-coil domain containing 134 [Source:RGD Symbol;Acc:1559657]	7:123364312-123376221	3.75217	4.38412	5.31381	6.16431	5.25301	6.27224	4.48337	5.89652	0.395281	0.0273277	0.358853	-
NONRATT015586.2	2:198421226-198422243	1018	2.20952	1.62595	2.27398	0.640103	0.668773	0.511775	2.03648	0.606884	-1.74659	0.000117192	0.0244545	DOWN	trans	ENSRNOG00000009826	Bche	butyrylcholinesterase [Source:RGD Symbol;Acc:619996]	2:171100140-171196395	4.68349	4.21825	4.23699	3.2387	3.53189	4.0856	4.37957	3.61873	-0.275307	0.0236701	0.33293	-
NONRATT015586.2	2:198421226-198422243	1018	2.20952	1.62595	2.27398	0.640103	0.668773	0.511775	2.03648	0.606884	-1.74659	0.000117192	0.0244545	DOWN	trans	ENSRNOG00000033101	Myo18a	myosin XVIIIa [Source:RGD Symbol;Acc:1562698]	10:64979770-65080535	27.8319	29.5368	27.4762	31.8037	32.444	31.7232	28.2816	31.9903	0.17777	0.00721786	0.169727	-
NONRATT015586.2	2:198421226-198422243	1018	2.20952	1.62595	2.27398	0.640103	0.668773	0.511775	2.03648	0.606884	-1.74659	0.000117192	0.0244545	DOWN	trans	ENSRNOG00000015787	P3h4	prolyl 3-hydroxylase family member 4 [Source:RGD Symbol;Acc:620767]	10:88318817-88325326	6.56879	4.2007	5.01667	3.92419	5.2383	3.96162	5.26205	4.3747	-0.26644	0.160948	0.757474	-
NONRATT015586.2	2:198421226-198422243	1018	2.20952	1.62595	2.27398	0.640103	0.668773	0.511775	2.03648	0.606884	-1.74659	0.000117192	0.0244545	DOWN	trans	ENSRNOG00000037919	Chic1	cysteine-rich hydrophobic domain 1 [Source:RGD Symbol;Acc:1589722]	X:74200972-74244846	7.26577	7.33525	8.58804	6.59441	7.33241	7.02308	7.72968	6.9833	-0.146501	0.286849	0.890804	-
NONRATT015586.2	2:198421226-198422243	1018	2.20952	1.62595	2.27398	0.640103	0.668773	0.511775	2.03648	0.606884	-1.74659	0.000117192	0.0244545	DOWN	trans	ENSRNOG00000006925	Zfp786	zinc finger protein 786 [Source:RGD Symbol;Acc:2293500]	4:77495663-77510202	1.93225	2.03743	2.19642	1.92323	1.72273	2.07494	2.05536	1.90697	-0.108114	0.556859	0.996692	-
NONRATT015586.2	2:198421226-198422243	1018	2.20952	1.62595	2.27398	0.640103	0.668773	0.511775	2.03648	0.606884	-1.74659	0.000117192	0.0244545	DOWN	trans	ENSRNOG00000016655	Pex6	peroxisomal biogenesis factor 6 [Source:RGD Symbol;Acc:621637]	9:16566688-16581078	3.32091	3.39465	3.54616	3.44874	3.87361	3.79416	3.42057	3.7055	0.115431	0.326443	0.913131	-
NONRATT015586.2	2:198421226-198422243	1018	2.20952	1.62595	2.27398	0.640103	0.668773	0.511775	2.03648	0.606884	-1.74659	0.000117192	0.0244545	DOWN	trans	ENSRNOG00000020482	Nfatc4	nuclear factor of activated T-cells, cytoplasmic, calcineurin-dependent 4 [Source:RGD Symbol;Acc:1310749]	15:34493138-34504326	0.766756	1.01346	0.89074	0.852241	0.539189	0.449238	0.890319	0.613556	-0.537126	0.030314	0.372948	-
NONRATT015586.2	2:198421226-198422243	1018	2.20952	1.62595	2.27398	0.640103	0.668773	0.511775	2.03648	0.606884	-1.74659	0.000117192	0.0244545	DOWN	trans	ENSRNOG00000060693	AC118147.2	cation channel sperm-associated protein subunit gamma precursor [Source:RefSeq peptide;Acc:NP_001163811]	1:88131554-88162583	1.04655	1.20383	1.20017	1.5625	0.831281	1.06234	1.15018	1.15204	0.00233026	0.971726	1	-
NONRATT015586.2	2:198421226-198422243	1018	2.20952	1.62595	2.27398	0.640103	0.668773	0.511775	2.03648	0.606884	-1.74659	0.000117192	0.0244545	DOWN	trans	ENSRNOG00000047620	Golph3l	golgi phosphoprotein 3-like [Source:RGD Symbol;Acc:1359281]	2:197715761-197750115	7.94838	7.06707	6.84678	7.11157	7.86121	7.06043	7.28741	7.3444	0.0112386	0.90571	1	-
NONRATT015586.2	2:198421226-198422243	1018	2.20952	1.62595	2.27398	0.640103	0.668773	0.511775	2.03648	0.606884	-1.74659	0.000117192	0.0244545	DOWN	trans	ENSRNOG00000006131	Mettl2b	methyltransferase like 2B [Source:RGD Symbol;Acc:1310240]	10:93354003-93379470	2.17677	2.05508	2.70173	2.53733	2.875	2.05042	2.3112	2.48759	0.106107	0.587519	1	-
NONRATT015586.2	2:198421226-198422243	1018	2.20952	1.62595	2.27398	0.640103	0.668773	0.511775	2.03648	0.606884	-1.74659	0.000117192	0.0244545	DOWN	trans	ENSRNOG00000019318	Syt3	synaptotagmin III [Source:RGD Symbol;Acc:3805]	1:100379186-100408083	13.3424	13.0102	12.3625	12.3991	15.3097	13.6469	12.905	13.7852	0.0951874	0.307438	0.900043	-
NONRATT015586.2	2:198421226-198422243	1018	2.20952	1.62595	2.27398	0.640103	0.668773	0.511775	2.03648	0.606884	-1.74659	0.000117192	0.0244545	DOWN	trans	ENSRNOG00000006965	Aff4	AF4/FMR2 family, member 4 [Source:RGD Symbol;Acc:1311694]	10:38692211-38773021	41.9815	42.3008	42.3821	44.0802	42.1591	41.6643	42.2215	42.6346	0.0140467	0.787553	1	-
NONRATT015586.2	2:198421226-198422243	1018	2.20952	1.62595	2.27398	0.640103	0.668773	0.511775	2.03648	0.606884	-1.74659	0.000117192	0.0244545	DOWN	trans	ENSRNOG00000010985	Zfp410	zinc finger protein 410 [Source:RGD Symbol;Acc:1305636]	6:108032856-108058809	12.4581	13.5123	12.9194	12.9054	12.9683	13.0393	12.9633	12.971	0.000859251	0.968025	1	-
NONRATT015586.2	2:198421226-198422243	1018	2.20952	1.62595	2.27398	0.640103	0.668773	0.511775	2.03648	0.606884	-1.74659	0.000117192	0.0244545	DOWN	trans	ENSRNOG00000058940	Rab11fip1	RAB11 family interacting protein 1 (class I) [Source:RGD Symbol;Acc:1562965]	16:69048739-69079332	0.848469	0.484165	0.63929	1.12838	0.859695	0.830473	0.657308	0.939516	0.515347	0.0240478	0.335628	-
NONRATT015586.2	2:198421226-198422243	1018	2.20952	1.62595	2.27398	0.640103	0.668773	0.511775	2.03648	0.606884	-1.74659	0.000117192	0.0244545	DOWN	trans	ENSRNOG00000059322	N4bp2l1	NEDD4 binding protein 2-like 1 [Source:RGD Symbol;Acc:1595713]	12:546760-576746	6.48219	5.94181	6.64749	5.38101	7.53932	5.56394	6.35716	6.16143	-0.0451194	0.786778	1	-
NONRATT015586.2	2:198421226-198422243	1018	2.20952	1.62595	2.27398	0.640103	0.668773	0.511775	2.03648	0.606884	-1.74659	0.000117192	0.0244545	DOWN	trans	ENSRNOG00000013166	Wnt4	wingless-type MMTV integration site family, member 4 [Source:RGD Symbol;Acc:621348]	5:155649217-155672579	3.40654	2.53916	2.4279	1.52831	2.00871	1.05445	2.7912	1.53049	-0.866893	2.80887e-05	0.0034502	-
NONRATT015586.2	2:198421226-198422243	1018	2.20952	1.62595	2.27398	0.640103	0.668773	0.511775	2.03648	0.606884	-1.74659	0.000117192	0.0244545	DOWN	trans	ENSRNOG00000017157	Trim69	tripartite motif-containing 69 [Source:RGD Symbol;Acc:1305074]	3:114102875-114126523	0.346003	0.381422	0.320494	0.553485	0.530043	0.327121	0.349307	0.470216	0.428831	0.152352	0.742889	-
NONRATT015586.2	2:198421226-198422243	1018	2.20952	1.62595	2.27398	0.640103	0.668773	0.511775	2.03648	0.606884	-1.74659	0.000117192	0.0244545	DOWN	trans	ENSRNOG00000001285	Atp2a2	ATPase, Ca++ transporting, cardiac muscle, slow twitch 2 [Source:RGD Symbol;Acc:2174]	12:39553903-39603326	196.217	201.939	208.236	207.592	214.783	214.062	202.131	212.146	0.0697668	0.237541	0.86089	-
NONRATT015586.2	2:198421226-198422243	1018	2.20952	1.62595	2.27398	0.640103	0.668773	0.511775	2.03648	0.606884	-1.74659	0.000117192	0.0244545	DOWN	trans	ENSRNOG00000021200	Hfe2	hemochromatosis type 2 (juvenile) [Source:RGD Symbol;Acc:1310195]	2:198655437-198659317	0	0.0390139	0	0	0	0.0809731	0.0130046	0.026991	1.05345	1	1	-
NONRATT015586.2	2:198421226-198422243	1018	2.20952	1.62595	2.27398	0.640103	0.668773	0.511775	2.03648	0.606884	-1.74659	0.000117192	0.0244545	DOWN	trans	ENSRNOG00000027434	Fitm2	fat storage-inducing transmembrane protein 2 [Source:RGD Symbol;Acc:1307696]	3:159856994-159863506	8.33577	9.38167	9.96192	9.37611	10.1856	9.18283	9.22645	9.5815	0.0544758	0.564283	0.997609	-
NONRATT015586.2	2:198421226-198422243	1018	2.20952	1.62595	2.27398	0.640103	0.668773	0.511775	2.03648	0.606884	-1.74659	0.000117192	0.0244545	DOWN	trans	ENSRNOG00000020751	Rdm1	RAD52 motif containing 1 [Source:RGD Symbol;Acc:1310432]	10:89539556-89550500	3.24868	2.47157	2.43414	3.46453	2.6691	2.83609	2.71813	2.98991	0.137484	0.514907	0.985627	-
NONRATT015586.2	2:198421226-198422243	1018	2.20952	1.62595	2.27398	0.640103	0.668773	0.511775	2.03648	0.606884	-1.74659	0.000117192	0.0244545	DOWN	trans	ENSRNOG00000012264	Alkbh1	alkB, alkylation repair homolog 1 (E. coli) [Source:RGD Symbol;Acc:1308327]	6:111456187-111477090	7.18406	6.83168	6.43492	6.56395	7.11182	7.13429	6.81689	6.93668	0.0251333	0.798863	1	-
NONRATT015586.2	2:198421226-198422243	1018	2.20952	1.62595	2.27398	0.640103	0.668773	0.511775	2.03648	0.606884	-1.74659	0.000117192	0.0244545	DOWN	trans	ENSRNOG00000025406	Iqgap2	IQ motif containing GTPase activating protein 2 [Source:RGD Symbol;Acc:2321734]	2:26167199-26438790	0.775844	1.10551	0.946146	1.16281	0.588889	0.768971	0.942499	0.840222	-0.165719	0.534456	0.986465	-
NONRATT015586.2	2:198421226-198422243	1018	2.20952	1.62595	2.27398	0.640103	0.668773	0.511775	2.03648	0.606884	-1.74659	0.000117192	0.0244545	DOWN	trans	ENSRNOG00000009783	Camk2g	calcium/calmodulin-dependent protein kinase II gamma [Source:RGD Symbol;Acc:621802]	15:3936786-3995915	0.779838	0.797375	0.745263	0.630036	0.840653	0.827822	0.774159	0.766171	-0.0149642	0.968218	1	-
NONRATT015586.2	2:198421226-198422243	1018	2.20952	1.62595	2.27398	0.640103	0.668773	0.511775	2.03648	0.606884	-1.74659	0.000117192	0.0244545	DOWN	trans	ENSRNOG00000030118	Msn	moesin [Source:RGD Symbol;Acc:621260]	X:65226748-65295810	11.4025	12.4459	13.5055	15.4911	13.2664	12.0436	12.4513	13.6004	0.12735	0.198094	0.8131	-
NONRATT015586.2	2:198421226-198422243	1018	2.20952	1.62595	2.27398	0.640103	0.668773	0.511775	2.03648	0.606884	-1.74659	0.000117192	0.0244545	DOWN	trans	ENSRNOG00000031916	Timeless	timeless circadian clock [Source:RGD Symbol;Acc:620939]	7:2643288-2667628	1.21822	0.921842	1.29338	1.13102	1.30589	0.878605	1.14448	1.10517	-0.0504203	0.826192	1	-
NONRATT015586.2	2:198421226-198422243	1018	2.20952	1.62595	2.27398	0.640103	0.668773	0.511775	2.03648	0.606884	-1.74659	0.000117192	0.0244545	DOWN	trans	ENSRNOG00000001811	Fgfr1op2	FGFR1 oncogene partner 2 [Source:RGD Symbol;Acc:1303233]	4:180887182-180908198	10.2824	11.1537	10.672	10.5839	9.74708	11.1028	10.7027	10.4779	-0.030618	0.769729	1	-
NONRATT015586.2	2:198421226-198422243	1018	2.20952	1.62595	2.27398	0.640103	0.668773	0.511775	2.03648	0.606884	-1.74659	0.000117192	0.0244545	DOWN	trans	ENSRNOG00000054724	Pycrl	pyrroline-5-carboxylate reductase-like [Source:RGD Symbol;Acc:1309115]	7:116949879-116955148	8.86453	11.3178	7.56542	7.97272	10.0648	8.30102	9.24925	8.7795	-0.0751981	0.695575	1	-
NONRATT015586.2	2:198421226-198422243	1018	2.20952	1.62595	2.27398	0.640103	0.668773	0.511775	2.03648	0.606884	-1.74659	0.000117192	0.0244545	DOWN	trans	ENSRNOG00000000956	Rasl11a	RAS-like family 11 member A [Source:RGD Symbol;Acc:1303231]	12:9985928-9990284	0.656831	0.92345	1.1048	1.26086	1.03846	0.766961	0.895026	1.02209	0.191527	0.553052	0.996223	-
NONRATT015586.2	2:198421226-198422243	1018	2.20952	1.62595	2.27398	0.640103	0.668773	0.511775	2.03648	0.606884	-1.74659	0.000117192	0.0244545	DOWN	trans	ENSRNOG00000027979	LOC500354	similar to C030030A07Rik protein [Source:RGD Symbol;Acc:1563896]	4:170820594-170821995	0.0558685	0.0589383	0	0	0	0.305845	0.0382689	0.101948	1.41359	0.540759	0.989456	-
NONRATT015586.2	2:198421226-198422243	1018	2.20952	1.62595	2.27398	0.640103	0.668773	0.511775	2.03648	0.606884	-1.74659	0.000117192	0.0244545	DOWN	trans	ENSRNOG00000000457	Tap1	transporter 1, ATP-binding cassette, sub-family B (MDR/TAP) [Source:RGD Symbol;Acc:3817]	20:3979035-3989669	0.945901	1.09549	1.15862	1.12449	0.948396	1.05245	1.06667	1.04178	-0.0340644	0.905388	1	-
NONRATT015586.2	2:198421226-198422243	1018	2.20952	1.62595	2.27398	0.640103	0.668773	0.511775	2.03648	0.606884	-1.74659	0.000117192	0.0244545	DOWN	trans	ENSRNOG00000026061	RGD1566226	similar to hypothetical protein F830045P16 [Source:RGD Symbol;Acc:1566226]	3:121977350-122057632	0	0.0513461	0.141771	0.0259723	0.0607893	0.13329	0.0643723	0.0733507	0.18837	1	1	-
NONRATT015586.2	2:198421226-198422243	1018	2.20952	1.62595	2.27398	0.640103	0.668773	0.511775	2.03648	0.606884	-1.74659	0.000117192	0.0244545	DOWN	trans	ENSRNOG00000018326	Pgls	6-phosphogluconolactonase [Source:RGD Symbol;Acc:1307001]	16:20020444-20025930	2.50579	2.88553	2.91144	2.46129	2.26346	2.99573	2.76759	2.57349	-0.104901	0.632372	1	-
NONRATT015586.2	2:198421226-198422243	1018	2.20952	1.62595	2.27398	0.640103	0.668773	0.511775	2.03648	0.606884	-1.74659	0.000117192	0.0244545	DOWN	trans	ENSRNOG00000024450	Poc1b	POC1 centriolar protein B [Source:RGD Symbol;Acc:2323942]	7:41304440-41404370	3.84877	3.72011	3.31974	3.53439	3.66972	3.33549	3.62954	3.5132	-0.0470009	0.775396	1	-
NONRATT015586.2	2:198421226-198422243	1018	2.20952	1.62595	2.27398	0.640103	0.668773	0.511775	2.03648	0.606884	-1.74659	0.000117192	0.0244545	DOWN	trans	ENSRNOG00000002866	Rassf6	Ras association (RalGDS/AF-6) domain family member 6 [Source:RGD Symbol;Acc:1566082]	14:18983853-19025971	0.993499	0.853581	0.946205	1.25569	1.33192	0.866033	0.931095	1.15121	0.306155	0.187405	0.80017	-
NONRATT015586.2	2:198421226-198422243	1018	2.20952	1.62595	2.27398	0.640103	0.668773	0.511775	2.03648	0.606884	-1.74659	0.000117192	0.0244545	DOWN	trans	ENSRNOG00000007203	Psmc6	proteasome (prosome, macropain) 26S subunit, ATPase, 6 [Source:RGD Symbol;Acc:1308825]	15:19667453-19688914	42.7093	36.2148	38.0885	37.6804	37.0739	35.7233	39.0042	36.8259	-0.0829089	0.341623	0.927539	-
NONRATT015586.2	2:198421226-198422243	1018	2.20952	1.62595	2.27398	0.640103	0.668773	0.511775	2.03648	0.606884	-1.74659	0.000117192	0.0244545	DOWN	trans	ENSRNOG00000059801	Lima1	LIM domain and actin binding 1 [Source:RGD Symbol;Acc:1564050]	7:141428063-141528397	5.61361	6.81087	6.98366	6.65811	5.74921	6.95279	6.46938	6.45337	-0.00357508	1	1	-
NONRATT015586.2	2:198421226-198422243	1018	2.20952	1.62595	2.27398	0.640103	0.668773	0.511775	2.03648	0.606884	-1.74659	0.000117192	0.0244545	DOWN	trans	ENSRNOG00000002011	Gnrhr	gonadotropin releasing hormone receptor [Source:RGD Symbol;Acc:70513]	14:23480462-23498450	0.0597237	0	0	0	0	0.0653835	0.0199079	0.0217945	0.130624	1	1	-
NONRATT015586.2	2:198421226-198422243	1018	2.20952	1.62595	2.27398	0.640103	0.668773	0.511775	2.03648	0.606884	-1.74659	0.000117192	0.0244545	DOWN	trans	ENSRNOG00000024128	Aco2	aconitase 2, mitochondrial [Source:RGD Symbol;Acc:621360]	7:123102468-123145635	85.9296	85.3972	86.1453	90.4904	87.6567	86.809	85.824	88.3187	0.0413374	0.469104	0.985627	-
NONRATT015586.2	2:198421226-198422243	1018	2.20952	1.62595	2.27398	0.640103	0.668773	0.511775	2.03648	0.606884	-1.74659	0.000117192	0.0244545	DOWN	trans	ENSRNOG00000005153	LOC690422	hypothetical protein LOC690422 [Source:RGD Symbol;Acc:1596085]	6:137967401-137980217	2.08958	2.53894	2.32308	2.25792	3.10912	3.07521	2.3172	2.81408	0.280283	0.0731977	0.564246	-
NONRATT015586.2	2:198421226-198422243	1018	2.20952	1.62595	2.27398	0.640103	0.668773	0.511775	2.03648	0.606884	-1.74659	0.000117192	0.0244545	DOWN	trans	ENSRNOG00000019208	P2rx5	purinergic receptor P2X, ligand-gated ion channel, 5 [Source:RGD Symbol;Acc:620256]	10:59725619-59740865	1.04952	1.10666	1.04357	1.06398	1.43939	1.07799	1.06658	1.19379	0.162555	0.405814	0.963023	-
NONRATT015586.2	2:198421226-198422243	1018	2.20952	1.62595	2.27398	0.640103	0.668773	0.511775	2.03648	0.606884	-1.74659	0.000117192	0.0244545	DOWN	trans	ENSRNOG00000006658	RGD1563015	RGD1563015 [Source:RGD Symbol;Acc:1563015]	5:138254946-138267601	0	0	0.0895321	0.0492066	0	0.101002	0.029844	0.0500695	0.746489	1	1	-
NONRATT015586.2	2:198421226-198422243	1018	2.20952	1.62595	2.27398	0.640103	0.668773	0.511775	2.03648	0.606884	-1.74659	0.000117192	0.0244545	DOWN	trans	ENSRNOG00000000934	Piwil1	piwi-like RNA-mediated gene silencing 1 [Source:RGD Symbol;Acc:1306980]	12:31609053-31629881	0.0586724	0.0206321	0.0379589	0.0417243	0	0.0214215	0.0390878	0.0210486	-0.892994	0.519743	0.985627	-
NONRATT015586.2	2:198421226-198422243	1018	2.20952	1.62595	2.27398	0.640103	0.668773	0.511775	2.03648	0.606884	-1.74659	0.000117192	0.0244545	DOWN	trans	ENSRNOG00000016953	Chst4	carbohydrate (N-acetylglucosamine 6-O) sulfotransferase 4 [Source:RGD Symbol;Acc:1310798]	19:41631715-41640367	0.282043	0.0371879	0.205255	0.0752051	0.220026	0.154366	0.174829	0.149866	-0.22227	0.864102	1	-
NONRATT015586.2	2:198421226-198422243	1018	2.20952	1.62595	2.27398	0.640103	0.668773	0.511775	2.03648	0.606884	-1.74659	0.000117192	0.0244545	DOWN	trans	ENSRNOG00000043204	Harbi1	harbinger transposase derived 1 [Source:RGD Symbol;Acc:1584007]	3:80614937-80624205	6.8951	7.50936	7.79018	6.69724	6.06084	7.15829	7.39821	6.63879	-0.156256	0.235197	0.859098	-
NONRATT015586.2	2:198421226-198422243	1018	2.20952	1.62595	2.27398	0.640103	0.668773	0.511775	2.03648	0.606884	-1.74659	0.000117192	0.0244545	DOWN	trans	ENSRNOG00000018714	Arl5b	ADP-ribosylation factor-like 5B [Source:RGD Symbol;Acc:1305569]	17:82065937-82091362	7.81775	7.87212	7.45796	8.13374	6.60908	6.90429	7.71594	7.2157	-0.0967022	0.364282	0.94801	-
NONRATT015586.2	2:198421226-198422243	1018	2.20952	1.62595	2.27398	0.640103	0.668773	0.511775	2.03648	0.606884	-1.74659	0.000117192	0.0244545	DOWN	trans	ENSRNOG00000007023	Galm	galactose mutarotase (aldose 1-epimerase) [Source:RGD Symbol;Acc:1359459]	6:2808841-2860744	4.02866	5.81863	3.84356	5.77652	6.04268	5.67022	4.56361	5.82981	0.353272	0.0398192	0.421104	-
NONRATT015586.2	2:198421226-198422243	1018	2.20952	1.62595	2.27398	0.640103	0.668773	0.511775	2.03648	0.606884	-1.74659	0.000117192	0.0244545	DOWN	trans	ENSRNOG00000008619	Agtrap	angiotensin II receptor-associated protein [Source:RGD Symbol;Acc:1359346]	5:164886813-164898420	11.1137	11.0742	10.7404	13.1313	12.4028	9.86175	10.9761	11.7986	0.104254	0.338175	0.923339	-
NONRATT015586.2	2:198421226-198422243	1018	2.20952	1.62595	2.27398	0.640103	0.668773	0.511775	2.03648	0.606884	-1.74659	0.000117192	0.0244545	DOWN	trans	ENSRNOG00000057141	AABR07035641.1	-	12:20592216-20660304	0	0	0	0	0.0567167	0	0	0.0189056	Inf	0.297357	0.891638	-
NONRATT015586.2	2:198421226-198422243	1018	2.20952	1.62595	2.27398	0.640103	0.668773	0.511775	2.03648	0.606884	-1.74659	0.000117192	0.0244545	DOWN	trans	ENSRNOG00000049019	Tmem170a	transmembrane protein 170A [Source:RGD Symbol;Acc:1559505]	19:44088612-44101365	2.28755	1.96069	1.9212	2.79618	2.0538	2.70922	2.05648	2.51973	0.293092	0.0582882	0.506017	-
NONRATT015586.2	2:198421226-198422243	1018	2.20952	1.62595	2.27398	0.640103	0.668773	0.511775	2.03648	0.606884	-1.74659	0.000117192	0.0244545	DOWN	trans	ENSRNOG00000011573	Csad	cysteine sulfinic acid decarboxylase [Source:RGD Symbol;Acc:621030]	7:143781702-143793970	8.13267	7.06851	7.16048	10.1692	9.40519	7.19623	7.45389	8.92355	0.259625	0.0563327	0.498673	-
NONRATT015586.2	2:198421226-198422243	1018	2.20952	1.62595	2.27398	0.640103	0.668773	0.511775	2.03648	0.606884	-1.74659	0.000117192	0.0244545	DOWN	trans	ENSRNOG00000007504	Actr10	actin-related protein 10 homolog (S. cerevisiae) [Source:RGD Symbol;Acc:1306515]	6:93385457-93411576	43.8962	47.2184	45.6532	42.7443	47.5452	47.3271	45.5893	45.8722	0.00892341	0.890704	1	-
NONRATT015586.2	2:198421226-198422243	1018	2.20952	1.62595	2.27398	0.640103	0.668773	0.511775	2.03648	0.606884	-1.74659	0.000117192	0.0244545	DOWN	trans	ENSRNOG00000010169	Atpaf1	ATP synthase mitochondrial F1 complex assembly factor 1 [Source:RGD Symbol;Acc:1305417]	5:134641608-134667084	20.4177	19.9905	20.5596	24.0164	22.9897	22.4394	20.3226	23.1485	0.187833	0.00548453	0.14759	-
NONRATT015586.2	2:198421226-198422243	1018	2.20952	1.62595	2.27398	0.640103	0.668773	0.511775	2.03648	0.606884	-1.74659	0.000117192	0.0244545	DOWN	trans	ENSRNOG00000042029	Efs	embryonal Fyn-associated substrate [Source:RGD Symbol;Acc:1308966]	15:33578381-33589522	4.14809	4.00781	3.98969	3.66366	3.46694	3.78077	4.04853	3.63712	-0.154601	0.214626	0.833551	-
NONRATT015586.2	2:198421226-198422243	1018	2.20952	1.62595	2.27398	0.640103	0.668773	0.511775	2.03648	0.606884	-1.74659	0.000117192	0.0244545	DOWN	trans	ENSRNOG00000012436	Adh6	alcohol dehydrogenase 6 (class V) [Source:RGD Symbol;Acc:1306313]	2:243550627-243687857	0.133459	0.445605	0.107922	0.260931	0.277625	0.0973884	0.228995	0.211981	-0.111381	0.92726	1	-
NONRATT015586.2	2:198421226-198422243	1018	2.20952	1.62595	2.27398	0.640103	0.668773	0.511775	2.03648	0.606884	-1.74659	0.000117192	0.0244545	DOWN	trans	ENSRNOG00000001134	Rfc5	replication factor C (activator 1) 5 [Source:RGD Symbol;Acc:1309280]	12:44931494-44941324	4.68202	4.32869	4.51032	4.01615	5.25113	3.52834	4.50701	4.26521	-0.0795544	0.66023	1	-
NONRATT015586.2	2:198421226-198422243	1018	2.20952	1.62595	2.27398	0.640103	0.668773	0.511775	2.03648	0.606884	-1.74659	0.000117192	0.0244545	DOWN	trans	ENSRNOG00000015150	Spg7	spastic paraplegia 7 homolog (human) [Source:RGD Symbol;Acc:727940]	19:55880561-55915502	9.72246	13.5925	9.72067	10.6499	12.6007	13.4655	11.0119	12.2387	0.152391	0.236484	0.860812	-
NONRATT015586.2	2:198421226-198422243	1018	2.20952	1.62595	2.27398	0.640103	0.668773	0.511775	2.03648	0.606884	-1.74659	0.000117192	0.0244545	DOWN	trans	ENSRNOG00000004158	Hdac9	histone deacetylase 9 [Source:RGD Symbol;Acc:1310748]	6:53488883-54059119	5.5243	5.41303	5.53962	6.23852	5.93354	5.06133	5.49232	5.74447	0.0647581	0.502592	0.985627	-
NONRATT015586.2	2:198421226-198422243	1018	2.20952	1.62595	2.27398	0.640103	0.668773	0.511775	2.03648	0.606884	-1.74659	0.000117192	0.0244545	DOWN	trans	ENSRNOG00000000394	Srgn	serglycin [Source:RGD Symbol;Acc:619969]	20:32120320-32139789	5.9778	7.97474	6.50568	7.18498	5.73004	4.95312	6.8194	5.95605	-0.195291	0.248209	0.866649	-
NONRATT015586.2	2:198421226-198422243	1018	2.20952	1.62595	2.27398	0.640103	0.668773	0.511775	2.03648	0.606884	-1.74659	0.000117192	0.0244545	DOWN	trans	ENSRNOG00000036760	Tmc5	transmembrane channel-like 5 [Source:RGD Symbol;Acc:1307037]	1:188278469-188337308	1.27285	1.09811	1.45972	0.987207	1.44433	1.14005	1.27689	1.19053	-0.101037	0.651404	1	-
NONRATT015586.2	2:198421226-198422243	1018	2.20952	1.62595	2.27398	0.640103	0.668773	0.511775	2.03648	0.606884	-1.74659	0.000117192	0.0244545	DOWN	trans	ENSRNOG00000014584	Odf2	outer dense fiber of sperm tails 2 [Source:RGD Symbol;Acc:3229]	3:8450275-8496008	10.228	10.8149	10.3546	9.93254	9.64621	8.85098	10.4659	9.47658	-0.143254	0.0977163	0.635044	-
NONRATT015586.2	2:198421226-198422243	1018	2.20952	1.62595	2.27398	0.640103	0.668773	0.511775	2.03648	0.606884	-1.74659	0.000117192	0.0244545	DOWN	trans	ENSRNOG00000031162	Ccl24	chemokine (C-C motif) ligand 24 [Source:RGD Symbol;Acc:1310245]	12:24148567-24152625	0.704244	0.386148	0.300675	0.270368	0.210959	0.123338	0.463689	0.201555	-1.20199	0.0123896	0.232684	-
NONRATT015586.2	2:198421226-198422243	1018	2.20952	1.62595	2.27398	0.640103	0.668773	0.511775	2.03648	0.606884	-1.74659	0.000117192	0.0244545	DOWN	trans	ENSRNOG00000017181	Malt1	MALT1 paracaspase [Source:RGD Symbol;Acc:1309195]	18:61109069-61162445	4.51648	4.69527	4.52152	5.49491	4.86327	5.83207	4.57775	5.39675	0.237451	0.0321924	0.384443	-
NONRATT015586.2	2:198421226-198422243	1018	2.20952	1.62595	2.27398	0.640103	0.668773	0.511775	2.03648	0.606884	-1.74659	0.000117192	0.0244545	DOWN	trans	ENSRNOG00000019727	Dph3	diphthamide biosynthesis 3 [Source:RGD Symbol;Acc:1590566]	16:8202048-8207464	6.69334	6.21689	6.51843	6.69992	6.60522	7.16851	6.47622	6.82455	0.075582	0.482152	0.985627	-
NONRATT015586.2	2:198421226-198422243	1018	2.20952	1.62595	2.27398	0.640103	0.668773	0.511775	2.03648	0.606884	-1.74659	0.000117192	0.0244545	DOWN	trans	ENSRNOG00000019629	Lamp1	lysosomal-associated membrane protein 1 [Source:RGD Symbol;Acc:2989]	16:81689590-81706561	235.882	237.935	238.169	220.417	226.209	228.586	237.329	225.071	-0.0765075	0.242035	0.86383	-
NONRATT015586.2	2:198421226-198422243	1018	2.20952	1.62595	2.27398	0.640103	0.668773	0.511775	2.03648	0.606884	-1.74659	0.000117192	0.0244545	DOWN	trans	ENSRNOG00000012037	Galnt7	polypeptide N-acetylgalactosaminyltransferase 7 [Source:RGD Symbol;Acc:620362]	16:35934970-36062719	7.22681	7.34749	7.41127	6.97679	7.9	7.66139	7.32853	7.51272	0.0358128	0.691238	1	-
NONRATT015586.2	2:198421226-198422243	1018	2.20952	1.62595	2.27398	0.640103	0.668773	0.511775	2.03648	0.606884	-1.74659	0.000117192	0.0244545	DOWN	trans	ENSRNOG00000005006	Ndufaf1	NADH dehydrogenase (ubiquinone) complex I, assembly factor 1 [Source:RGD Symbol;Acc:1306202]	3:111458572-111469518	16.6459	14.6918	14.5174	13.7193	14.4159	12.9581	15.285	13.6978	-0.158181	0.156201	0.74887	-
NONRATT015586.2	2:198421226-198422243	1018	2.20952	1.62595	2.27398	0.640103	0.668773	0.511775	2.03648	0.606884	-1.74659	0.000117192	0.0244545	DOWN	trans	ENSRNOG00000003298	Cd247	Cd247 molecule [Source:RGD Symbol;Acc:2305]	13:83996080-84071400	0.0458861	0.145174	0.0890601	0.0489472	0	0	0.0933734	0.0163157	-2.51675	0.133403	0.713397	-
NONRATT015586.2	2:198421226-198422243	1018	2.20952	1.62595	2.27398	0.640103	0.668773	0.511775	2.03648	0.606884	-1.74659	0.000117192	0.0244545	DOWN	trans	ENSRNOG00000001073	RGD1563482	similar to hypothetical protein FLJ38663 [Source:RGD Symbol;Acc:1563482]	12:37677019-37699616	1.20986	1.05646	1.32076	1.33056	1.43935	1.13819	1.19569	1.3027	0.123653	0.550561	0.995443	-
NONRATT015586.2	2:198421226-198422243	1018	2.20952	1.62595	2.27398	0.640103	0.668773	0.511775	2.03648	0.606884	-1.74659	0.000117192	0.0244545	DOWN	trans	ENSRNOG00000014409	Myl7	myosin, light chain 7, regulatory [Source:RGD Symbol;Acc:1308262]	14:86143862-86147553	0.0672918	0	0.0326679	0	0	0	0.0333199	0	#NAME?	0.263998	0.866649	-
NONRATT015586.2	2:198421226-198422243	1018	2.20952	1.62595	2.27398	0.640103	0.668773	0.511775	2.03648	0.606884	-1.74659	0.000117192	0.0244545	DOWN	trans	ENSRNOG00000002549	Htr5b	5-hydroxytryptamine (serotonin) receptor 5B [Source:RGD Symbol;Acc:62388]	13:37479758-37492680	0	0.111728	0.034288	0.0753407	0.132254	0.116003	0.0486719	0.107866	1.14808	0.405764	0.963023	-
NONRATT015586.2	2:198421226-198422243	1018	2.20952	1.62595	2.27398	0.640103	0.668773	0.511775	2.03648	0.606884	-1.74659	0.000117192	0.0244545	DOWN	trans	ENSRNOG00000003111	Ovca2	ovarian tumor suppressor candidate 2 [Source:RGD Symbol;Acc:1564623]	10:62017347-62020509	4.59088	3.12401	4.42893	4.35505	3.96455	4.55816	4.04794	4.29259	0.0846605	0.608581	1	-
NONRATT015586.2	2:198421226-198422243	1018	2.20952	1.62595	2.27398	0.640103	0.668773	0.511775	2.03648	0.606884	-1.74659	0.000117192	0.0244545	DOWN	trans	ENSRNOG00000026762	RT1-DOa	RT1 class II, locus DOa [Source:RGD Symbol;Acc:3477]	20:3889370-3892449	0.0744559	0.0261824	0.0481703	0.158819	0.0619642	0.0271842	0.0496029	0.0826559	0.736694	0.635604	1	-
NONRATT015586.2	2:198421226-198422243	1018	2.20952	1.62595	2.27398	0.640103	0.668773	0.511775	2.03648	0.606884	-1.74659	0.000117192	0.0244545	DOWN	trans	ENSRNOG00000023312	Lonrf2	LON peptidase N-terminal domain and ring finger 2 [Source:RGD Symbol;Acc:1562137]	9:45466688-45505767	90.6862	94.6731	93.1615	93.1723	93.788	96.8227	92.8403	94.5943	0.027003	0.629321	1	-
NONRATT015586.2	2:198421226-198422243	1018	2.20952	1.62595	2.27398	0.640103	0.668773	0.511775	2.03648	0.606884	-1.74659	0.000117192	0.0244545	DOWN	trans	ENSRNOG00000003622	Cybb	cytochrome b-245, beta polypeptide [Source:RGD Symbol;Acc:620574]	X:14578264-14612547	1.9049	1.75752	1.88399	3.51596	2.14905	1.44366	1.8488	2.36956	0.358028	0.171499	0.773801	-
NONRATT015586.2	2:198421226-198422243	1018	2.20952	1.62595	2.27398	0.640103	0.668773	0.511775	2.03648	0.606884	-1.74659	0.000117192	0.0244545	DOWN	trans	ENSRNOG00000012818	Ksr1	kinase suppressor of ras 1 [Source:RGD Symbol;Acc:1308105]	10:66347358-66482150	1.74712	1.82241	1.5495	1.60273	1.96971	1.89202	1.70634	1.82149	0.0942078	0.592258	1	-
NONRATT015586.2	2:198421226-198422243	1018	2.20952	1.62595	2.27398	0.640103	0.668773	0.511775	2.03648	0.606884	-1.74659	0.000117192	0.0244545	DOWN	trans	ENSRNOG00000014049	Riok1	RIO kinase 1 [Source:RGD Symbol;Acc:1306086]	17:27429416-27452314	8.9457	9.21704	9.05262	8.01358	8.13516	8.72965	9.07179	8.2928	-0.129528	0.230913	0.856823	-
NONRATT015586.2	2:198421226-198422243	1018	2.20952	1.62595	2.27398	0.640103	0.668773	0.511775	2.03648	0.606884	-1.74659	0.000117192	0.0244545	DOWN	trans	ENSRNOG00000021555	Mis18a	MIS18 kinetochore protein A [Source:RGD Symbol;Acc:1310778]	11:30879887-30893310	0	0.941811	0.611824	0	0	0.0575407	0.517878	0.0191802	-4.75492	0.000454164	0.0269218	DOWN
NONRATT015586.2	2:198421226-198422243	1018	2.20952	1.62595	2.27398	0.640103	0.668773	0.511775	2.03648	0.606884	-1.74659	0.000117192	0.0244545	DOWN	trans	ENSRNOG00000009348	Nos3	nitric oxide synthase 3, endothelial cell [Source:RGD Symbol;Acc:3186]	4:7320668-7342410	3.41995	4.25062	4.20827	3.24363	3.59665	2.45341	3.95961	3.09789	-0.354071	0.0214427	0.31622	-
NONRATT015586.2	2:198421226-198422243	1018	2.20952	1.62595	2.27398	0.640103	0.668773	0.511775	2.03648	0.606884	-1.74659	0.000117192	0.0244545	DOWN	trans	ENSRNOG00000022971	LOC102555919	zinc finger protein 454-like [Source:RGD Symbol;Acc:7529496]	10:36361312-36372436	3.28487	3.01614	3.97546	2.71589	2.83323	3.13131	3.42549	2.89348	-0.243505	0.110334	0.668532	-
NONRATT015586.2	2:198421226-198422243	1018	2.20952	1.62595	2.27398	0.640103	0.668773	0.511775	2.03648	0.606884	-1.74659	0.000117192	0.0244545	DOWN	trans	ENSRNOG00000034134	Cpm	carboxypeptidase M [Source:RGD Symbol;Acc:1310532]	7:60654350-60714620	18.327	17.8696	18.4812	13.6275	17.8339	16.4434	18.2259	15.9683	-0.190784	0.0517655	0.477497	-
NONRATT015586.2	2:198421226-198422243	1018	2.20952	1.62595	2.27398	0.640103	0.668773	0.511775	2.03648	0.606884	-1.74659	0.000117192	0.0244545	DOWN	trans	ENSRNOG00000047080	Gng4	guanine nucleotide binding protein (G protein), gamma 4 [Source:RGD Symbol;Acc:620806]	17:90266794-90315492	16.4472	15.3151	17.397	11.9703	12.6808	13.141	16.3864	12.5974	-0.379382	5.09902e-05	0.00554367	-
NONRATT015586.2	2:198421226-198422243	1018	2.20952	1.62595	2.27398	0.640103	0.668773	0.511775	2.03648	0.606884	-1.74659	0.000117192	0.0244545	DOWN	trans	ENSRNOG00000048606	Vma21	VMA21 vacuolar H+-ATPase homolog (S. cerevisiae) [Source:RGD Symbol;Acc:1566155]	16:70142761-70242979	1.20374	1.16853	1.46472	0.876184	0.953971	0.857578	1.279	0.895911	-0.513586	0.0150244	0.261321	-
NONRATT015586.2	2:198421226-198422243	1018	2.20952	1.62595	2.27398	0.640103	0.668773	0.511775	2.03648	0.606884	-1.74659	0.000117192	0.0244545	DOWN	trans	ENSRNOG00000001189	Sik1	salt-inducible kinase 1 [Source:RGD Symbol;Acc:69407]	20:10668411-10680283	4.4482	5.1544	5.00273	4.81076	4.80668	4.92109	4.86845	4.84617	-0.00661556	0.987932	1	-
NONRATT015586.2	2:198421226-198422243	1018	2.20952	1.62595	2.27398	0.640103	0.668773	0.511775	2.03648	0.606884	-1.74659	0.000117192	0.0244545	DOWN	trans	ENSRNOG00000056011	AC139950.1	-	6:78172762-78180924	4.88475	4.62115	3.94263	4.67375	4.44464	4.44781	4.48284	4.52207	0.0125674	0.9504	1	-
NONRATT015586.2	2:198421226-198422243	1018	2.20952	1.62595	2.27398	0.640103	0.668773	0.511775	2.03648	0.606884	-1.74659	0.000117192	0.0244545	DOWN	cis	ENSRNOG00000032224	Hist1h4b	histone cluster 1, H4b [Source:RGD Symbol;Acc:620814]	2:198411955-198412350	26.3108	26.4913	26.4908	32.7	35.8039	25.7705	26.431	31.4248	0.249673	0.115802	0.68341	-
NONRATT015586.2	2:198421226-198422243	1018	2.20952	1.62595	2.27398	0.640103	0.668773	0.511775	2.03648	0.606884	-1.74659	0.000117192	0.0244545	DOWN	trans	ENSRNOG00000016926	Plekhs1	pleckstrin homology domain containing, family S member 1 [Source:RGD Symbol;Acc:1559884]	1:277261681-277291370	0	0	0	0.0330249	0.038648	0.0339103	0	0.0351944	Inf	0.252613	0.866649	-
NONRATT015586.2	2:198421226-198422243	1018	2.20952	1.62595	2.27398	0.640103	0.668773	0.511775	2.03648	0.606884	-1.74659	0.000117192	0.0244545	DOWN	trans	ENSRNOG00000010855	Mrp63	mitochondrial ribosomal protein 63 [Source:RGD Symbol;Acc:1594654]	15:38095803-38097835	3.49254	3.12599	4.29543	3.20485	2.63589	3.86777	3.63799	3.23617	-0.168852	0.454293	0.985627	-
NONRATT015586.2	2:198421226-198422243	1018	2.20952	1.62595	2.27398	0.640103	0.668773	0.511775	2.03648	0.606884	-1.74659	0.000117192	0.0244545	DOWN	trans	ENSRNOG00000016632	Dsg3	desmoglein 3 [Source:RGD Symbol;Acc:1592103]	18:15650526-15688284	0	0.0234598	0.0108011	0.0237332	0	0	0.0114203	0.00791108	-0.529654	1	1	-
NONRATT015586.2	2:198421226-198422243	1018	2.20952	1.62595	2.27398	0.640103	0.668773	0.511775	2.03648	0.606884	-1.74659	0.000117192	0.0244545	DOWN	trans	ENSRNOG00000016683	Zfp668	zinc finger protein 668 [Source:RGD Symbol;Acc:1308623]	1:199310935-199320727	3.71494	3.13373	3.37955	3.51603	3.24585	3.20255	3.40941	3.32148	-0.037695	0.825136	1	-
NONRATT015586.2	2:198421226-198422243	1018	2.20952	1.62595	2.27398	0.640103	0.668773	0.511775	2.03648	0.606884	-1.74659	0.000117192	0.0244545	DOWN	trans	ENSRNOG00000003457	Ccdc64b	coiled-coil domain containing 64B [Source:RGD Symbol;Acc:1306729]	10:12980674-12992780	0.0139002	0	0	0.0148275	0	0	0.0046334	0.0049425	0.0931683	1	1	-
NONRATT015586.2	2:198421226-198422243	1018	2.20952	1.62595	2.27398	0.640103	0.668773	0.511775	2.03648	0.606884	-1.74659	0.000117192	0.0244545	DOWN	trans	ENSRNOG00000025423	Map3k13	mitogen-activated protein kinase kinase kinase 13 [Source:RGD Symbol;Acc:1561227]	11:82745735-82938357	6.9883	7.20383	7.63323	6.56748	6.53078	6.26755	7.27512	6.45527	-0.172494	0.0511823	0.474179	-
NONRATT015586.2	2:198421226-198422243	1018	2.20952	1.62595	2.27398	0.640103	0.668773	0.511775	2.03648	0.606884	-1.74659	0.000117192	0.0244545	DOWN	trans	ENSRNOG00000027787	Cdc6	cell division cycle 6 [Source:RGD Symbol;Acc:1309157]	10:86819472-86833402	0.139181	0.167717	0.154341	0.169629	0.322623	0.0653031	0.153746	0.185852	0.273603	0.721397	1	-
NONRATT015586.2	2:198421226-198422243	1018	2.20952	1.62595	2.27398	0.640103	0.668773	0.511775	2.03648	0.606884	-1.74659	0.000117192	0.0244545	DOWN	trans	ENSRNOG00000028662	Zfp69	zinc finger protein 69 [Source:RGD Symbol;Acc:2322990]	5:139857363-139864393	0.871512	1.05508	1.12757	0.894983	1.36984	0.989363	1.01805	1.08473	0.091523	0.763972	1	-
NONRATT015586.2	2:198421226-198422243	1018	2.20952	1.62595	2.27398	0.640103	0.668773	0.511775	2.03648	0.606884	-1.74659	0.000117192	0.0244545	DOWN	trans	ENSRNOG00000026488	Gltpd2	glycolipid transfer protein domain containing 2 [Source:RGD Symbol;Acc:1560459]	10:57125961-57128686	0.0640979	0.236602	0.124407	0.205087	0.160032	0.175448	0.141702	0.180189	0.346649	0.598198	1	-
NONRATT015586.2	2:198421226-198422243	1018	2.20952	1.62595	2.27398	0.640103	0.668773	0.511775	2.03648	0.606884	-1.74659	0.000117192	0.0244545	DOWN	trans	ENSRNOG00000014265	Tnfrsf19	tumor necrosis factor receptor superfamily, member 19 [Source:RGD Symbol;Acc:1564996]	15:41246308-41338284	10.418	10.5775	9.63542	10.8931	10.9465	11.0037	10.2103	10.9478	0.100608	0.251611	0.866649	-
NONRATT015586.2	2:198421226-198422243	1018	2.20952	1.62595	2.27398	0.640103	0.668773	0.511775	2.03648	0.606884	-1.74659	0.000117192	0.0244545	DOWN	trans	ENSRNOG00000017253	Ccdc107	coiled-coil domain containing 107 [Source:RGD Symbol;Acc:1560252]	5:58995249-58997953	30.8557	34.8905	32.9916	27.877	28.4981	34.5022	32.9126	30.2925	-0.11968	0.319544	0.909036	-
NONRATT015586.2	2:198421226-198422243	1018	2.20952	1.62595	2.27398	0.640103	0.668773	0.511775	2.03648	0.606884	-1.74659	0.000117192	0.0244545	DOWN	trans	ENSRNOG00000014935	Peo1	progressive external ophthalmoplegia 1 [Source:RGD Symbol;Acc:1307884]	1:264756499-264762892	11.5517	12.5935	10.935	11.4608	11.5405	12.0027	11.6934	11.668	-0.00313946	1	1	-
NONRATT015586.2	2:198421226-198422243	1018	2.20952	1.62595	2.27398	0.640103	0.668773	0.511775	2.03648	0.606884	-1.74659	0.000117192	0.0244545	DOWN	trans	ENSRNOG00000012965	Themis2	thymocyte selection associated family member 2 [Source:RGD Symbol;Acc:1561016]	5:150970909-150987081	0.388492	0.368676	0.452364	0.600739	0.557632	0.55286	0.403177	0.57041	0.500586	0.0865829	0.604186	-
NONRATT015586.2	2:198421226-198422243	1018	2.20952	1.62595	2.27398	0.640103	0.668773	0.511775	2.03648	0.606884	-1.74659	0.000117192	0.0244545	DOWN	trans	ENSRNOG00000011321	Rftn1	raftlin lipid raft linker 1 [Source:RGD Symbol;Acc:1563347]	9:12740885-12942358	2.16221	2.22146	2.82443	2.01024	1.34943	1.57798	2.4027	1.64588	-0.545795	0.010712	0.213764	-
NONRATT015586.2	2:198421226-198422243	1018	2.20952	1.62595	2.27398	0.640103	0.668773	0.511775	2.03648	0.606884	-1.74659	0.000117192	0.0244545	DOWN	trans	ENSRNOG00000002509	Gnl3l	guanine nucleotide binding protein-like 3 (nucleolar)-like [Source:RGD Symbol;Acc:1600217]	X:20034874-20070593	65.0885	65.6931	66.8427	62.7757	62.4846	64.5147	65.8748	63.2583	-0.0584702	0.398726	0.960621	-
NONRATT015586.2	2:198421226-198422243	1018	2.20952	1.62595	2.27398	0.640103	0.668773	0.511775	2.03648	0.606884	-1.74659	0.000117192	0.0244545	DOWN	trans	ENSRNOG00000011885	Rhpn2	rhophilin, Rho GTPase binding protein 2 [Source:RGD Symbol;Acc:1308366]	1:91596397-91657395	5.75549	5.52417	4.84504	6.63622	5.80243	6.08516	5.3749	6.1746	0.200108	0.107207	0.65798	-
NONRATT015586.2	2:198421226-198422243	1018	2.20952	1.62595	2.27398	0.640103	0.668773	0.511775	2.03648	0.606884	-1.74659	0.000117192	0.0244545	DOWN	trans	ENSRNOG00000016825	Cd3eap	CD3e molecule, epsilon associated protein [Source:RGD Symbol;Acc:1591707]	1:80267725-80271001	1.38244	1.33624	1.37876	0.900937	1.67764	1.13504	1.36581	1.23787	-0.141899	0.609658	1	-
NONRATT015586.2	2:198421226-198422243	1018	2.20952	1.62595	2.27398	0.640103	0.668773	0.511775	2.03648	0.606884	-1.74659	0.000117192	0.0244545	DOWN	trans	ENSRNOG00000019653	Csrnp2	cysteine-serine-rich nuclear protein 2 [Source:RGD Symbol;Acc:1308916]	7:142116335-142132173	6.72361	6.38065	7.17679	6.82096	5.91769	6.51108	6.76035	6.41658	-0.0752942	0.501411	0.985627	-
NONRATT015586.2	2:198421226-198422243	1018	2.20952	1.62595	2.27398	0.640103	0.668773	0.511775	2.03648	0.606884	-1.74659	0.000117192	0.0244545	DOWN	trans	ENSRNOG00000000308	Zbtb24	zinc finger and BTB domain containing 24 [Source:RGD Symbol;Acc:1306951]	20:46168177-46189806	3.6166	3.52856	3.61026	3.14754	2.77596	3.3675	3.58514	3.097	-0.211157	0.142944	0.726041	-
NONRATT015586.2	2:198421226-198422243	1018	2.20952	1.62595	2.27398	0.640103	0.668773	0.511775	2.03648	0.606884	-1.74659	0.000117192	0.0244545	DOWN	trans	ENSRNOG00000002265	Casr	calcium-sensing receptor [Source:RGD Symbol;Acc:2277]	11:67188630-67258771	0.299666	0.546885	0.301965	0.0983286	0.0863142	0.0504637	0.382839	0.0783688	-2.28839	6.04183e-08	1.89656e-05	DOWN
NONRATT015586.2	2:198421226-198422243	1018	2.20952	1.62595	2.27398	0.640103	0.668773	0.511775	2.03648	0.606884	-1.74659	0.000117192	0.0244545	DOWN	trans	ENSRNOG00000028814	Oasl2	2'-5' oligoadenylate synthetase-like 2 [Source:RGD Symbol;Acc:1307351]	12:47469598-47482961	2.53069	1.66037	1.66441	2.75877	2.59719	1.26205	1.95182	2.20601	0.176614	0.557153	0.996827	-
NONRATT015586.2	2:198421226-198422243	1018	2.20952	1.62595	2.27398	0.640103	0.668773	0.511775	2.03648	0.606884	-1.74659	0.000117192	0.0244545	DOWN	trans	ENSRNOG00000019165	Mrpl51	mitochondrial ribosomal protein L51 [Source:RGD Symbol;Acc:1306686]	4:157705790-157708748	35.6266	32.2592	35.117	35.2039	33.9715	32.9474	34.3342	34.0409	-0.0123784	0.910429	1	-
NONRATT015586.2	2:198421226-198422243	1018	2.20952	1.62595	2.27398	0.640103	0.668773	0.511775	2.03648	0.606884	-1.74659	0.000117192	0.0244545	DOWN	trans	ENSRNOG00000051408	Magt1	magnesium transporter 1 [Source:RGD Symbol;Acc:620094]	X:77020402-77061667	8.33701	7.49742	7.14174	8.35872	7.21424	7.23751	7.65872	7.60349	-0.0104418	0.945408	1	-
NONRATT015586.2	2:198421226-198422243	1018	2.20952	1.62595	2.27398	0.640103	0.668773	0.511775	2.03648	0.606884	-1.74659	0.000117192	0.0244545	DOWN	trans	ENSRNOG00000048138	Zfp566	zinc finger protein 566 [Source:RGD Symbol;Acc:1563239]	1:88415257-88428685	0.556265	0.586537	0.584736	0.840374	0.289289	0.30444	0.575846	0.478034	-0.26857	0.604988	1	-
NONRATT015586.2	2:198421226-198422243	1018	2.20952	1.62595	2.27398	0.640103	0.668773	0.511775	2.03648	0.606884	-1.74659	0.000117192	0.0244545	DOWN	trans	ENSRNOG00000013110	Nudt2	nudix (nucleoside diphosphate linked moiety X)-type motif 2 [Source:RGD Symbol;Acc:1303023]	5:57845819-57860658	26.3149	25.1916	21.5032	23.6321	25.823	26.9118	24.3366	25.4556	0.064858	0.586802	1	-
NONRATT015586.2	2:198421226-198422243	1018	2.20952	1.62595	2.27398	0.640103	0.668773	0.511775	2.03648	0.606884	-1.74659	0.000117192	0.0244545	DOWN	trans	ENSRNOG00000014083	Iqsec3	IQ motif and Sec7 domain 3 [Source:RGD Symbol;Acc:1593191]	4:153948055-154044493	26.0454	27.8319	28.3714	25.2738	28.5478	29.6198	27.4162	27.8138	0.0207723	0.758987	1	-
NONRATT015586.2	2:198421226-198422243	1018	2.20952	1.62595	2.27398	0.640103	0.668773	0.511775	2.03648	0.606884	-1.74659	0.000117192	0.0244545	DOWN	trans	ENSRNOG00000038365	Plekha2	pleckstrin homology domain-containing, family A (phosphoinositide binding specific) member 2 [Source:RGD Symbol;Acc:1586710]	16:71738718-71787787	3.15558	3.32735	3.14873	3.65094	3.30708	3.03076	3.21055	3.32959	0.0525236	0.663753	1	-
NONRATT015586.2	2:198421226-198422243	1018	2.20952	1.62595	2.27398	0.640103	0.668773	0.511775	2.03648	0.606884	-1.74659	0.000117192	0.0244545	DOWN	trans	ENSRNOG00000020377	Cideb	cell death-inducing DFFA-like effector b [Source:RGD Symbol;Acc:1310000]	15:34439876-34444244	0	0	0.0613313	0	0	0.0691881	0.0204438	0.0230627	0.1739	1	1	-
NONRATT015586.2	2:198421226-198422243	1018	2.20952	1.62595	2.27398	0.640103	0.668773	0.511775	2.03648	0.606884	-1.74659	0.000117192	0.0244545	DOWN	trans	ENSRNOG00000004555	Sec14l4	SEC14-like 4 (S. cerevisiae) [Source:RGD Symbol;Acc:1565810]	14:84274550-84319449	0.0796304	0.0763322	0.0421435	0.0694781	0.0993878	0.0475423	0.0660354	0.0721361	0.127482	0.807951	1	-
NONRATT015586.2	2:198421226-198422243	1018	2.20952	1.62595	2.27398	0.640103	0.668773	0.511775	2.03648	0.606884	-1.74659	0.000117192	0.0244545	DOWN	trans	ENSRNOG00000011228	Layn	layilin [Source:RGD Symbol;Acc:1564444]	8:55447709-55467688	0.729149	0.73134	0.897365	0.948273	1.68705	0.759266	0.785951	1.13153	0.525761	0.0755902	0.569909	-
NONRATT015586.2	2:198421226-198422243	1018	2.20952	1.62595	2.27398	0.640103	0.668773	0.511775	2.03648	0.606884	-1.74659	0.000117192	0.0244545	DOWN	trans	ENSRNOG00000026110	Scml4	sex comb on midleg-like 4 (Drosophila) [Source:RGD Symbol;Acc:1310898]	20:47596575-47689245	0.474863	1.25894	0.434454	0.564278	0.440313	0.401018	0.722751	0.468536	-0.625337	0.113255	0.676248	-
NONRATT015586.2	2:198421226-198422243	1018	2.20952	1.62595	2.27398	0.640103	0.668773	0.511775	2.03648	0.606884	-1.74659	0.000117192	0.0244545	DOWN	trans	ENSRNOG00000026702	Amica1	adhesion molecule, interacts with CXADR antigen 1 [Source:RGD Symbol;Acc:1562572]	8:49378644-49410088	0.116849	0.338783	0.226735	0.342654	0.145831	0.191836	0.227455	0.226773	-0.0043324	1	1	-
NONRATT015586.2	2:198421226-198422243	1018	2.20952	1.62595	2.27398	0.640103	0.668773	0.511775	2.03648	0.606884	-1.74659	0.000117192	0.0244545	DOWN	trans	ENSRNOG00000002254	Tmem33	transmembrane protein 33 [Source:RGD Symbol;Acc:708371]	14:42535701-42560174	45.8101	47.6765	45.654	47.1901	43.9736	45.8183	46.3802	45.6607	-0.0225573	0.779822	1	-
NONRATT015586.2	2:198421226-198422243	1018	2.20952	1.62595	2.27398	0.640103	0.668773	0.511775	2.03648	0.606884	-1.74659	0.000117192	0.0244545	DOWN	trans	ENSRNOG00000012358	Pcyt1b	phosphate cytidylyltransferase 1, choline, beta [Source:RGD Symbol;Acc:708434]	X:62727755-62818522	15.1368	13.9657	13.1262	13.4922	14.981	13.9426	14.0763	14.1386	0.0063715	0.935833	1	-
NONRATT015586.2	2:198421226-198422243	1018	2.20952	1.62595	2.27398	0.640103	0.668773	0.511775	2.03648	0.606884	-1.74659	0.000117192	0.0244545	DOWN	trans	ENSRNOG00000009250	Pts	6-pyruvoyl-tetrahydropterin synthase [Source:RGD Symbol;Acc:68367]	8:54954226-54961265	8.50946	10.4795	8.8876	10.8758	6.7296	8.17754	9.29218	8.59431	-0.112634	0.571472	1	-
NONRATT015586.2	2:198421226-198422243	1018	2.20952	1.62595	2.27398	0.640103	0.668773	0.511775	2.03648	0.606884	-1.74659	0.000117192	0.0244545	DOWN	trans	ENSRNOG00000011975	Crtc3	CREB regulated transcription coactivator 3 [Source:RGD Symbol;Acc:1309666]	1:142393207-142500383	1.6251	1.48676	1.57693	1.2743	1.46165	1.28193	1.56293	1.33929	-0.222781	0.277047	0.880986	-
NONRATT015586.2	2:198421226-198422243	1018	2.20952	1.62595	2.27398	0.640103	0.668773	0.511775	2.03648	0.606884	-1.74659	0.000117192	0.0244545	DOWN	trans	ENSRNOG00000019212	Tpp1	tripeptidyl peptidase I [Source:RGD Symbol;Acc:621296]	1:170588035-170594168	41.3895	40.4989	43.2405	49.7537	47.1093	47.1146	41.7097	47.9925	0.202429	0.0044614	0.127868	-
NONRATT015586.2	2:198421226-198422243	1018	2.20952	1.62595	2.27398	0.640103	0.668773	0.511775	2.03648	0.606884	-1.74659	0.000117192	0.0244545	DOWN	trans	ENSRNOG00000006523	Atl2	atlastin GTPase 2 [Source:RGD Symbol;Acc:1305125]	6:2568990-2610437	16.7809	18.3112	19.3652	17.5214	16.7524	18.6994	18.1524	17.6577	-0.039861	0.674999	1	-
NONRATT015586.2	2:198421226-198422243	1018	2.20952	1.62595	2.27398	0.640103	0.668773	0.511775	2.03648	0.606884	-1.74659	0.000117192	0.0244545	DOWN	trans	ENSRNOG00000010794	Dennd3	DENN/MADD domain containing 3 [Source:RGD Symbol;Acc:1311559]	7:114724610-114812708	3.52054	3.91362	3.66778	4.3365	4.51351	4.30207	3.70065	4.38403	0.24448	0.0234049	0.330635	-
NONRATT015586.2	2:198421226-198422243	1018	2.20952	1.62595	2.27398	0.640103	0.668773	0.511775	2.03648	0.606884	-1.74659	0.000117192	0.0244545	DOWN	trans	ENSRNOG00000049115	Ccr5	chemokine (C-C motif) receptor 5 [Source:RGD Symbol;Acc:620596]	8:133197032-133215614	7.14518	6.12715	8.95916	5.89849	8.05892	6.33758	7.4105	6.765	-0.131481	0.407713	0.963081	-
NONRATT015586.2	2:198421226-198422243	1018	2.20952	1.62595	2.27398	0.640103	0.668773	0.511775	2.03648	0.606884	-1.74659	0.000117192	0.0244545	DOWN	trans	ENSRNOG00000042289	Plcxd2	phosphatidylinositol-specific phospholipase C, X domain containing 2 [Source:RGD Symbol;Acc:1563504]	11:57207656-57260568	29.6786	27.9678	28.9465	28.267	28.1878	26.8934	28.8643	27.7827	-0.0551002	0.438553	0.982138	-
NONRATT015586.2	2:198421226-198422243	1018	2.20952	1.62595	2.27398	0.640103	0.668773	0.511775	2.03648	0.606884	-1.74659	0.000117192	0.0244545	DOWN	trans	ENSRNOG00000001339	Psmd9	proteasome (prosome, macropain) 26S subunit, non-ATPase, 9 [Source:RGD Symbol;Acc:621110]	12:38786540-38805121	6.47477	5.65857	6.7923	6.09619	6.33434	8.10961	6.30855	6.84671	0.118104	0.499655	0.985627	-
NONRATT015586.2	2:198421226-198422243	1018	2.20952	1.62595	2.27398	0.640103	0.668773	0.511775	2.03648	0.606884	-1.74659	0.000117192	0.0244545	DOWN	trans	ENSRNOG00000018901	Rab14	RAB14, member RAS oncogene family [Source:RGD Symbol;Acc:620881]	3:14375249-14386118	62.4143	60.0917	60.9043	62.0196	59.63	54.7878	61.1368	58.8125	-0.0559186	0.507586	0.985627	-
NONRATT015586.2	2:198421226-198422243	1018	2.20952	1.62595	2.27398	0.640103	0.668773	0.511775	2.03648	0.606884	-1.74659	0.000117192	0.0244545	DOWN	trans	ENSRNOG00000009599	Rwdd2a	RWD domain containing 2A [Source:RGD Symbol;Acc:1306231]	8:94243372-94246496	1.29445	1.25569	1.75852	1.87737	1.8096	1.58704	1.43622	1.758	0.29166	0.306709	0.89899	-
NONRATT015586.2	2:198421226-198422243	1018	2.20952	1.62595	2.27398	0.640103	0.668773	0.511775	2.03648	0.606884	-1.74659	0.000117192	0.0244545	DOWN	trans	ENSRNOG00000032703	Rasgrp3	RAS guanyl releasing protein 3 (calcium and DAG-regulated) [Source:RGD Symbol;Acc:1304612]	6:21072634-21135880	25.0031	25.132	24.6349	22.3965	28.0118	26.6174	24.9233	25.6752	0.0428802	0.606086	1	-
NONRATT015586.2	2:198421226-198422243	1018	2.20952	1.62595	2.27398	0.640103	0.668773	0.511775	2.03648	0.606884	-1.74659	0.000117192	0.0244545	DOWN	trans	ENSRNOG00000022893	Rimbp2	RIMS binding protein 2 [Source:RGD Symbol;Acc:708533]	12:31530699-31620760	7.9864	8.17718	8.4482	8.58092	7.9898	8.88344	8.20393	8.48472	0.0485526	0.516097	0.985627	-
NONRATT015586.2	2:198421226-198422243	1018	2.20952	1.62595	2.27398	0.640103	0.668773	0.511775	2.03648	0.606884	-1.74659	0.000117192	0.0244545	DOWN	trans	ENSRNOG00000001426	Prkrip1	Prkr interacting protein 1 (IL11 inducible) [Source:RGD Symbol;Acc:1595708]	12:23514981-23535968	8.41608	8.69187	8.85655	8.03257	8.01056	8.51896	8.65483	8.18737	-0.0801069	0.426002	0.973718	-
NONRATT015586.2	2:198421226-198422243	1018	2.20952	1.62595	2.27398	0.640103	0.668773	0.511775	2.03648	0.606884	-1.74659	0.000117192	0.0244545	DOWN	trans	ENSRNOG00000020444	Hcn3	hyperpolarization-activated cyclic nucleotide-gated potassium channel 3 [Source:RGD Symbol;Acc:620691]	2:188454853-188471988	5.69248	6.60774	6.19944	6.37026	5.855	6.25831	6.16655	6.16119	-0.0012537	0.983388	1	-
NONRATT015586.2	2:198421226-198422243	1018	2.20952	1.62595	2.27398	0.640103	0.668773	0.511775	2.03648	0.606884	-1.74659	0.000117192	0.0244545	DOWN	trans	ENSRNOG00000001050	Eif2ak1	eukaryotic translation initiation factor 2 alpha kinase 1 [Source:RGD Symbol;Acc:70883]	12:12749037-12782146	23.7373	26.6857	22.8644	24.4766	26.2881	24.8388	24.4291	25.2012	0.0448869	0.587565	1	-
NONRATT015586.2	2:198421226-198422243	1018	2.20952	1.62595	2.27398	0.640103	0.668773	0.511775	2.03648	0.606884	-1.74659	0.000117192	0.0244545	DOWN	trans	ENSRNOG00000019817	Ddx28	DEAD (Asp-Glu-Ala-Asp) box polypeptide 28 [Source:RGD Symbol;Acc:1311976]	19:37988423-37990353	4.66542	4.91938	4.56655	4.97535	5.01314	4.84082	4.71712	4.9431	0.0675116	0.666223	1	-
NONRATT015586.2	2:198421226-198422243	1018	2.20952	1.62595	2.27398	0.640103	0.668773	0.511775	2.03648	0.606884	-1.74659	0.000117192	0.0244545	DOWN	trans	ENSRNOG00000011560	Mtmr9	myotubularin related protein 9 [Source:RGD Symbol;Acc:628840]	15:46693383-46719252	29.0987	30.8055	30.9244	29.5686	29.9549	31.1884	30.2762	30.2373	-0.00185546	0.982641	1	-
NONRATT015586.2	2:198421226-198422243	1018	2.20952	1.62595	2.27398	0.640103	0.668773	0.511775	2.03648	0.606884	-1.74659	0.000117192	0.0244545	DOWN	trans	ENSRNOG00000038445	Rnf225	ring finger protein 225 [Source:RGD Symbol;Acc:1561909]	1:65657276-65659945	0	0.0722574	0.0332681	0.255812	0	0.150045	0.0351751	0.135286	1.94338	0.108207	0.662508	-
NONRATT015586.2	2:198421226-198422243	1018	2.20952	1.62595	2.27398	0.640103	0.668773	0.511775	2.03648	0.606884	-1.74659	0.000117192	0.0244545	DOWN	trans	ENSRNOG00000047867	Klhdc8b	kelch domain containing 8B [Source:RGD Symbol;Acc:1359445]	8:117231769-117237229	5.75301	6.77604	6.68118	6.68997	6.95167	5.35984	6.40341	6.33383	-0.0157631	0.928919	1	-
NONRATT015586.2	2:198421226-198422243	1018	2.20952	1.62595	2.27398	0.640103	0.668773	0.511775	2.03648	0.606884	-1.74659	0.000117192	0.0244545	DOWN	trans	ENSRNOG00000018574	Qsox2	quiescin Q6 sulfhydryl oxidase 2 [Source:RGD Symbol;Acc:1584720]	3:3662324-3691972	5.98444	6.39934	7.03741	6.5082	5.48623	6.14406	6.47373	6.04616	-0.0985777	0.401473	0.960761	-
NONRATT015586.2	2:198421226-198422243	1018	2.20952	1.62595	2.27398	0.640103	0.668773	0.511775	2.03648	0.606884	-1.74659	0.000117192	0.0244545	DOWN	trans	ENSRNOG00000013171	Grm2	glutamate receptor, metabotropic 2 [Source:RGD Symbol;Acc:2743]	8:115344999-115358046	2.37753	2.70533	2.48965	2.88204	2.26306	2.78993	2.52417	2.64501	0.0674645	0.633104	1	-
NONRATT015586.2	2:198421226-198422243	1018	2.20952	1.62595	2.27398	0.640103	0.668773	0.511775	2.03648	0.606884	-1.74659	0.000117192	0.0244545	DOWN	trans	ENSRNOG00000022939	Gpkow	G patch domain and KOW motifs [Source:RGD Symbol;Acc:1583600]	X:15636563-15651332	12.358	11.8443	11.0129	11.4411	10.9211	10.4489	11.7384	10.937	-0.102012	0.278747	0.88166	-
NONRATT015586.2	2:198421226-198422243	1018	2.20952	1.62595	2.27398	0.640103	0.668773	0.511775	2.03648	0.606884	-1.74659	0.000117192	0.0244545	DOWN	trans	ENSRNOG00000014628	Pomk	protein-O-mannose kinase [Source:RGD Symbol;Acc:1310810]	16:70859280-70869634	17.8493	18.7362	18.7247	19.2637	17.0607	15.4323	18.4367	17.2523	-0.0957995	0.329812	0.914238	-
NONRATT015586.2	2:198421226-198422243	1018	2.20952	1.62595	2.27398	0.640103	0.668773	0.511775	2.03648	0.606884	-1.74659	0.000117192	0.0244545	DOWN	trans	ENSRNOG00000014331	Zfp717	zinc finger protein 717 [Source:RGD Symbol;Acc:2319964]	8:23275936-23282989	24.9706	25.1254	24.2306	24.1931	24.5142	25.7777	24.7755	24.8283	0.00307145	0.933549	1	-
NONRATT015586.2	2:198421226-198422243	1018	2.20952	1.62595	2.27398	0.640103	0.668773	0.511775	2.03648	0.606884	-1.74659	0.000117192	0.0244545	DOWN	trans	ENSRNOG00000022268	Pnpla3	patatin-like phospholipase domain containing 3 [Source:RGD Symbol;Acc:1595843]	7:125034764-125055976	2.4123	2.49223	3.33389	3.06627	3.34555	2.13395	2.74614	2.84859	0.0528437	0.807943	1	-
NONRATT015586.2	2:198421226-198422243	1018	2.20952	1.62595	2.27398	0.640103	0.668773	0.511775	2.03648	0.606884	-1.74659	0.000117192	0.0244545	DOWN	trans	ENSRNOG00000009620	Cybrd1	cytochrome b reductase 1 [Source:RGD Symbol;Acc:1305740]	3:57718364-57746097	1.60488	2.11532	1.53786	2.18217	1.27704	1.18588	1.75269	1.54837	-0.178824	0.492432	0.985627	-
NONRATT015586.2	2:198421226-198422243	1018	2.20952	1.62595	2.27398	0.640103	0.668773	0.511775	2.03648	0.606884	-1.74659	0.000117192	0.0244545	DOWN	trans	ENSRNOG00000010572	Pus7	pseudouridylate synthase 7 [Source:RGD Symbol;Acc:1307054]	4:7889869-7930706	6.1217	5.51361	6.18782	6.6644	5.45222	6.21281	5.94104	6.10981	0.0404112	0.743741	1	-
NONRATT015586.2	2:198421226-198422243	1018	2.20952	1.62595	2.27398	0.640103	0.668773	0.511775	2.03648	0.606884	-1.74659	0.000117192	0.0244545	DOWN	trans	ENSRNOG00000016448	Eef2k	eukaryotic elongation factor-2 kinase [Source:RGD Symbol;Acc:2538]	1:190780236-190842324	12.0769	12.2489	12.2253	11.75	11.2243	12.3135	12.1837	11.7626	-0.0507453	0.57417	1	-
NONRATT015586.2	2:198421226-198422243	1018	2.20952	1.62595	2.27398	0.640103	0.668773	0.511775	2.03648	0.606884	-1.74659	0.000117192	0.0244545	DOWN	trans	ENSRNOG00000009076	Ttpal	tocopherol (alpha) transfer protein-like [Source:RGD Symbol;Acc:1305754]	3:159995064-160013274	11.7373	12.6615	12.1279	13.9058	13.5104	12.8488	12.1756	13.4217	0.140573	0.0763548	0.573487	-
NONRATT015586.2	2:198421226-198422243	1018	2.20952	1.62595	2.27398	0.640103	0.668773	0.511775	2.03648	0.606884	-1.74659	0.000117192	0.0244545	DOWN	trans	ENSRNOG00000025408	Duxbl1	double homeobox B-like 1 [Source:RGD Symbol;Acc:1311053]	16:3754968-3765917	2.57842	2.11906	2.55722	1.77924	2.86339	2.44904	2.41823	2.36389	-0.0327924	0.880178	1	-
NONRATT015586.2	2:198421226-198422243	1018	2.20952	1.62595	2.27398	0.640103	0.668773	0.511775	2.03648	0.606884	-1.74659	0.000117192	0.0244545	DOWN	trans	ENSRNOG00000005749	Foxred2	FAD-dependent oxidoreductase domain containing 2 [Source:RGD Symbol;Acc:1306763]	7:119170181-119185238	4.72472	4.92833	4.74901	5.27335	5.07298	4.28232	4.80069	4.87622	0.0225213	0.841338	1	-
NONRATT015586.2	2:198421226-198422243	1018	2.20952	1.62595	2.27398	0.640103	0.668773	0.511775	2.03648	0.606884	-1.74659	0.000117192	0.0244545	DOWN	trans	ENSRNOG00000020167	Reep5	receptor accessory protein 5 [Source:RGD Symbol;Acc:1306047]	18:27128464-27159693	194.712	189.332	189.256	176.276	176.411	171.131	191.1	174.606	-0.130228	0.0410653	0.428779	-
NONRATT015586.2	2:198421226-198422243	1018	2.20952	1.62595	2.27398	0.640103	0.668773	0.511775	2.03648	0.606884	-1.74659	0.000117192	0.0244545	DOWN	trans	ENSRNOG00000038720	Cdkl1	cyclin-dependent kinase-like 1 (CDC2-related kinase) [Source:RGD Symbol;Acc:1305080]	6:92077416-92121351	15.1806	15.8234	14.4774	16.1427	16.8851	15.7135	15.1605	16.2471	0.0998636	0.320036	0.909036	-
NONRATT015586.2	2:198421226-198422243	1018	2.20952	1.62595	2.27398	0.640103	0.668773	0.511775	2.03648	0.606884	-1.74659	0.000117192	0.0244545	DOWN	trans	ENSRNOG00000048861	LOC498122	similar to CG15908-PA [Source:RGD Symbol;Acc:1595717]	11:86299210-86303453	8.96085	10.2022	9.12204	7.15248	7.61665	7.2819	9.42837	7.35034	-0.359197	0.0117197	0.225896	-
NONRATT015586.2	2:198421226-198422243	1018	2.20952	1.62595	2.27398	0.640103	0.668773	0.511775	2.03648	0.606884	-1.74659	0.000117192	0.0244545	DOWN	trans	ENSRNOG00000014218	Tmem25	transmembrane protein 25 [Source:RGD Symbol;Acc:1596132]	8:49100759-49106177	14.0695	16.2669	15.4789	16.2216	18.0235	16.5503	15.2717	16.9318	0.148871	0.11626	0.684883	-
NONRATT015586.2	2:198421226-198422243	1018	2.20952	1.62595	2.27398	0.640103	0.668773	0.511775	2.03648	0.606884	-1.74659	0.000117192	0.0244545	DOWN	trans	ENSRNOG00000008064	Naga	N-acetyl galactosaminidase, alpha [Source:RGD Symbol;Acc:1306025]	7:123563059-123572082	15.7269	17.7536	16.374	15.3905	18.7064	17.6214	16.6182	17.2395	0.0529513	0.606462	1	-
NONRATT015586.2	2:198421226-198422243	1018	2.20952	1.62595	2.27398	0.640103	0.668773	0.511775	2.03648	0.606884	-1.74659	0.000117192	0.0244545	DOWN	trans	ENSRNOG00000000230	Lmf1	lipase maturation factor 1 [Source:RGD Symbol;Acc:1310180]	10:14945265-15031942	7.2603	6.85167	6.37586	7.27808	6.75137	7.07362	6.82928	7.03436	0.0426853	0.718294	1	-
NONRATT015586.2	2:198421226-198422243	1018	2.20952	1.62595	2.27398	0.640103	0.668773	0.511775	2.03648	0.606884	-1.74659	0.000117192	0.0244545	DOWN	trans	ENSRNOG00000029115	RGD1564883	similar to 60S ribosomal protein L12 [Source:RGD Symbol;Acc:1564883]	7:59762502-59763219	1.09102	0.575198	0.846939	0.581728	1.08947	1.07493	0.83772	0.915373	0.127892	1	1	-
NONRATT015586.2	2:198421226-198422243	1018	2.20952	1.62595	2.27398	0.640103	0.668773	0.511775	2.03648	0.606884	-1.74659	0.000117192	0.0244545	DOWN	trans	ENSRNOG00000018009	Rab8b	RAB8B, member RAS oncogene family [Source:RGD Symbol;Acc:628764]	8:72638003-72714664	13.6973	14.2187	14.3575	13.4923	13.5359	13.3651	14.0912	13.4644	-0.0656364	0.440196	0.982713	-
NONRATT015586.2	2:198421226-198422243	1018	2.20952	1.62595	2.27398	0.640103	0.668773	0.511775	2.03648	0.606884	-1.74659	0.000117192	0.0244545	DOWN	trans	ENSRNOG00000011663	Rnf7	ring finger protein 7 [Source:RGD Symbol;Acc:1311048]	8:104326719-104335729	4.80262	4.86677	5.44708	5.78683	3.81473	4.30155	5.03882	4.63437	-0.120713	0.571547	1	-
NONRATT015586.2	2:198421226-198422243	1018	2.20952	1.62595	2.27398	0.640103	0.668773	0.511775	2.03648	0.606884	-1.74659	0.000117192	0.0244545	DOWN	trans	ENSRNOG00000000841	Ddx39b	DEAD (Asp-Glu-Ala-Asp) box polypeptide 39B [Source:RGD Symbol;Acc:70923]	20:4806108-4818568	53.0859	55.0365	55.834	57.1573	57.1714	56.5934	54.6522	56.974	0.0600258	0.325089	0.912849	-
NONRATT015586.2	2:198421226-198422243	1018	2.20952	1.62595	2.27398	0.640103	0.668773	0.511775	2.03648	0.606884	-1.74659	0.000117192	0.0244545	DOWN	trans	ENSRNOG00000020076	RGD1311783	similar to RIKEN cDNA 2010012O05 [Source:RGD Symbol;Acc:1311783]	1:266451021-266464903	24.3713	27.2004	25.5636	20.7688	21.2073	23.6393	25.7118	21.8718	-0.233356	0.0123201	0.232149	-
NONRATT015586.2	2:198421226-198422243	1018	2.20952	1.62595	2.27398	0.640103	0.668773	0.511775	2.03648	0.606884	-1.74659	0.000117192	0.0244545	DOWN	trans	ENSRNOG00000026569	LOC102555377	zinc finger protein 182-like [Source:RGD Symbol;Acc:7744154]	1:62133816-62174310	6.47501	5.81713	6.14224	7.33865	6.1974	5.65785	6.14479	6.39797	0.0582496	0.656076	1	-
NONRATT015586.2	2:198421226-198422243	1018	2.20952	1.62595	2.27398	0.640103	0.668773	0.511775	2.03648	0.606884	-1.74659	0.000117192	0.0244545	DOWN	trans	ENSRNOG00000060320	Lin28a	Protein Lin28a; RCG30757 [Source:UniProtKB/TrEMBL;Acc:D3ZZA6]	5:152230343-152247332	0.0667565	0.0234749	0	0	0	0.0487219	0.0300771	0.0162406	-0.889059	0.709088	1	-
NONRATT015586.2	2:198421226-198422243	1018	2.20952	1.62595	2.27398	0.640103	0.668773	0.511775	2.03648	0.606884	-1.74659	0.000117192	0.0244545	DOWN	trans	ENSRNOG00000042427	Gskip	GSK3B interacting protein [Source:RGD Symbol;Acc:1308470]	6:129519709-129536221	13.1659	11.9213	12.8465	12.7181	13.0193	12.4165	12.6445	12.718	0.00835538	0.9268	1	-
NONRATT015586.2	2:198421226-198422243	1018	2.20952	1.62595	2.27398	0.640103	0.668773	0.511775	2.03648	0.606884	-1.74659	0.000117192	0.0244545	DOWN	trans	ENSRNOG00000021719	Slfn5	schlafen family member 5 [Source:RGD Symbol;Acc:1312025]	10:70298519-70312070	7.04168	7.51236	6.60188	5.75358	5.71308	4.98788	7.05197	5.48485	-0.362575	0.000151012	0.0123918	-
NONRATT015586.2	2:198421226-198422243	1018	2.20952	1.62595	2.27398	0.640103	0.668773	0.511775	2.03648	0.606884	-1.74659	0.000117192	0.0244545	DOWN	trans	ENSRNOG00000011820	Acpp	acid phosphatase, prostate [Source:RGD Symbol;Acc:2023]	8:112834707-112884077	0.148196	0.170464	0.0522874	0.114934	0.168151	0.132725	0.123649	0.138603	0.164708	0.81647	1	-
NONRATT015586.2	2:198421226-198422243	1018	2.20952	1.62595	2.27398	0.640103	0.668773	0.511775	2.03648	0.606884	-1.74659	0.000117192	0.0244545	DOWN	trans	ENSRNOG00000007887	Elk4	ELK4, ETS-domain protein (SRF accessory protein 1) [Source:RGD Symbol;Acc:1310504]	13:48790509-48813260	9.44146	9.73882	1.42175	8.01697	8.92186	1.42405	6.86734	6.12096	-0.165994	0.767029	1	-
NONRATT015586.2	2:198421226-198422243	1018	2.20952	1.62595	2.27398	0.640103	0.668773	0.511775	2.03648	0.606884	-1.74659	0.000117192	0.0244545	DOWN	trans	ENSRNOG00000013610	Chrna5	cholinergic receptor, nicotinic, alpha 5 (neuronal) [Source:RGD Symbol;Acc:2347]	8:59561817-59590172	4.73438	4.09425	6.2301	7.44621	4.61273	1.28636	5.01957	4.44843	-0.174267	0.658087	1	-
NONRATT015586.2	2:198421226-198422243	1018	2.20952	1.62595	2.27398	0.640103	0.668773	0.511775	2.03648	0.606884	-1.74659	0.000117192	0.0244545	DOWN	trans	ENSRNOG00000039829	Rpp14	ribonuclease P/MRP 14 subunit [Source:RGD Symbol;Acc:1305436]	15:18625964-18632536	9.49409	11.724	10.74	10.9369	11.1533	10.3932	10.6527	10.8278	0.0235252	0.848917	1	-
NONRATT015586.2	2:198421226-198422243	1018	2.20952	1.62595	2.27398	0.640103	0.668773	0.511775	2.03648	0.606884	-1.74659	0.000117192	0.0244545	DOWN	trans	ENSRNOG00000027091	Kctd18	potassium channel tetramerization domain containing 18 [Source:RGD Symbol;Acc:1564820]	9:64852301-64916652	5.03142	5.86523	4.47009	4.77105	5.65049	5.17366	5.12224	5.1984	0.0212909	0.849128	1	-
NONRATT015586.2	2:198421226-198422243	1018	2.20952	1.62595	2.27398	0.640103	0.668773	0.511775	2.03648	0.606884	-1.74659	0.000117192	0.0244545	DOWN	trans	ENSRNOG00000055408	Gcat	glycine C-acetyltransferase [Source:RGD Symbol;Acc:1307291]	7:120263054-120269451	3.39087	3.20737	2.90324	3.45657	3.17432	3.38444	3.16716	3.33844	0.0759839	0.707225	1	-
NONRATT015586.2	2:198421226-198422243	1018	2.20952	1.62595	2.27398	0.640103	0.668773	0.511775	2.03648	0.606884	-1.74659	0.000117192	0.0244545	DOWN	trans	ENSRNOG00000052061	Ppef2	protein phosphatase, EF hand calcium-binding domain 2 [Source:RGD Symbol;Acc:1307093]	14:17306825-17333588	1.9407	2.19046	1.51186	1.48663	2.08118	2.48355	1.88101	2.01712	0.100793	0.688321	1	-
NONRATT015586.2	2:198421226-198422243	1018	2.20952	1.62595	2.27398	0.640103	0.668773	0.511775	2.03648	0.606884	-1.74659	0.000117192	0.0244545	DOWN	trans	ENSRNOG00000049137	Zfp35	zinc finger protein 35 [Source:RGD Symbol;Acc:1312031]	18:15883182-15898821	4.87088	5.13602	4.97377	4.76293	4.58322	5.00403	4.99356	4.78339	-0.0620331	0.597639	1	-
NONRATT015586.2	2:198421226-198422243	1018	2.20952	1.62595	2.27398	0.640103	0.668773	0.511775	2.03648	0.606884	-1.74659	0.000117192	0.0244545	DOWN	trans	ENSRNOG00000008022	Apaf1	apoptotic peptidase activating factor 1 [Source:RGD Symbol;Acc:620575]	7:31699885-31784192	4.34145	5.05181	4.87337	4.69834	4.40891	4.71041	4.75554	4.60589	-0.0461307	0.70165	1	-
NONRATT015586.2	2:198421226-198422243	1018	2.20952	1.62595	2.27398	0.640103	0.668773	0.511775	2.03648	0.606884	-1.74659	0.000117192	0.0244545	DOWN	trans	ENSRNOG00000036699	RGD1306926	similar to hypothetical protein FLJ22175 [Source:RGD Symbol;Acc:1306926]	10:109539548-109551362	4.08478	4.22882	4.15111	4.46704	3.912	3.60981	4.15491	3.99628	-0.0561578	0.667995	1	-
NONRATT015586.2	2:198421226-198422243	1018	2.20952	1.62595	2.27398	0.640103	0.668773	0.511775	2.03648	0.606884	-1.74659	0.000117192	0.0244545	DOWN	trans	ENSRNOG00000036866	Acer3	alkaline ceramidase 3 [Source:RGD Symbol;Acc:1561254]	1:163160979-163263606	16.6519	15.625	15.8679	14.2464	14.1756	14.747	16.0483	14.3897	-0.157384	0.0574496	0.502265	-
NONRATT015586.2	2:198421226-198422243	1018	2.20952	1.62595	2.27398	0.640103	0.668773	0.511775	2.03648	0.606884	-1.74659	0.000117192	0.0244545	DOWN	trans	ENSRNOG00000005491	Best3	bestrophin 3 [Source:RGD Symbol;Acc:1305439]	7:60015998-60057152	0.634525	0.250906	0.333515	1.07141	0.825038	0.607792	0.406315	0.834747	1.03874	0.00489818	0.136817	-
NONRATT015586.2	2:198421226-198422243	1018	2.20952	1.62595	2.27398	0.640103	0.668773	0.511775	2.03648	0.606884	-1.74659	0.000117192	0.0244545	DOWN	trans	ENSRNOG00000010071	RGD1560010	RGD1560010 [Source:RGD Symbol;Acc:1560010]	2:178389799-178393113	1.45671	1.10934	1.76692	1.89871	1.06063	1.06311	1.44432	1.34082	-0.107281	0.760176	1	-
NONRATT015586.2	2:198421226-198422243	1018	2.20952	1.62595	2.27398	0.640103	0.668773	0.511775	2.03648	0.606884	-1.74659	0.000117192	0.0244545	DOWN	trans	ENSRNOG00000007629	Sf3a3	splicing factor 3a, subunit 3 [Source:RGD Symbol;Acc:1308726]	5:142702685-142722341	12.8863	13.9107	13.0244	11.2933	12.9951	12.5424	13.2738	12.2769	-0.112636	0.261197	0.866649	-
NONRATT015586.2	2:198421226-198422243	1018	2.20952	1.62595	2.27398	0.640103	0.668773	0.511775	2.03648	0.606884	-1.74659	0.000117192	0.0244545	DOWN	trans	ENSRNOG00000001427	Orai2	ORAI calcium release-activated calcium modulator 2 [Source:RGD Symbol;Acc:1310213]	12:23544287-23564569	10.7367	12.9104	9.35318	13.5336	9.73169	16.6219	11.0001	13.2957	0.273446	0.0890099	0.611626	-
NONRATT015586.2	2:198421226-198422243	1018	2.20952	1.62595	2.27398	0.640103	0.668773	0.511775	2.03648	0.606884	-1.74659	0.000117192	0.0244545	DOWN	trans	ENSRNOG00000025360	Exd1	exonuclease 3'-5' domain containing 1 [Source:RGD Symbol;Acc:1561009]	3:111326480-111354419	0.433322	0.456891	0.46474	0.340487	0.313122	0.29959	0.451651	0.317733	-0.507393	0.138253	0.719122	-
NONRATT015586.2	2:198421226-198422243	1018	2.20952	1.62595	2.27398	0.640103	0.668773	0.511775	2.03648	0.606884	-1.74659	0.000117192	0.0244545	DOWN	trans	ENSRNOG00000029466	RGD1562608	similar to KIAA1328 protein [Source:RGD Symbol;Acc:1562608]	18:17403407-17676049	5.54474	4.75035	6.35189	6.01574	5.71935	5.90123	5.549	5.87877	0.0832887	0.495929	0.985627	-
NONRATT015586.2	2:198421226-198422243	1018	2.20952	1.62595	2.27398	0.640103	0.668773	0.511775	2.03648	0.606884	-1.74659	0.000117192	0.0244545	DOWN	trans	ENSRNOG00000017975	Dnajb13	DnaJ (Hsp40) homolog, subfamily B, member 13 [Source:RGD Symbol;Acc:1359131]	1:165515726-165530095	0.382495	0.439968	0.539849	0.185389	0.347198	0.304523	0.454104	0.279036	-0.702569	0.127658	0.704958	-
NONRATT015586.2	2:198421226-198422243	1018	2.20952	1.62595	2.27398	0.640103	0.668773	0.511775	2.03648	0.606884	-1.74659	0.000117192	0.0244545	DOWN	trans	ENSRNOG00000019830	Hsd17b1	hydroxysteroid (17-beta) dehydrogenase 1 [Source:RGD Symbol;Acc:2836]	10:88987558-88989757	0.441027	0.406935	0.534978	0.47033	0.412862	0.784577	0.46098	0.555923	0.270181	0.612503	1	-
NONRATT015586.2	2:198421226-198422243	1018	2.20952	1.62595	2.27398	0.640103	0.668773	0.511775	2.03648	0.606884	-1.74659	0.000117192	0.0244545	DOWN	trans	ENSRNOG00000018330	Fam83f	family with sequence similarity 83, member F [Source:RGD Symbol;Acc:1562089]	7:121889157-121918772	0.767519	0.485588	0.546165	0.572973	0.415132	0.840198	0.599757	0.609434	0.023092	1	1	-
NONRATT015586.2	2:198421226-198422243	1018	2.20952	1.62595	2.27398	0.640103	0.668773	0.511775	2.03648	0.606884	-1.74659	0.000117192	0.0244545	DOWN	trans	ENSRNOG00000000417	Numa1	nuclear mitotic apparatus protein 1 [Source:RGD Symbol;Acc:1308777]	1:167051209-167091453	25.4276	25.7331	24.5977	26.2881	25.7346	25.1113	25.2528	25.7113	0.0259608	0.663994	1	-
NONRATT015586.2	2:198421226-198422243	1018	2.20952	1.62595	2.27398	0.640103	0.668773	0.511775	2.03648	0.606884	-1.74659	0.000117192	0.0244545	DOWN	trans	ENSRNOG00000001161	Gatc	glutamyl-tRNA(Gln) amidotransferase, subunit C [Source:RGD Symbol;Acc:1309698]	12:46989951-47039542	11.9534	10.2778	12.8447	10.5659	12.1163	11.3729	11.6919	11.3517	-0.0426089	0.747378	1	-
NONRATT015586.2	2:198421226-198422243	1018	2.20952	1.62595	2.27398	0.640103	0.668773	0.511775	2.03648	0.606884	-1.74659	0.000117192	0.0244545	DOWN	trans	ENSRNOG00000005193	Pfas	phosphoribosylformylglycinamidine synthase [Source:RGD Symbol;Acc:1304926]	10:55571118-55589978	9.72777	9.6219	10.4326	11.1799	11.1512	11.0155	9.92744	11.1155	0.163081	0.0283876	0.364304	-
NONRATT015586.2	2:198421226-198422243	1018	2.20952	1.62595	2.27398	0.640103	0.668773	0.511775	2.03648	0.606884	-1.74659	0.000117192	0.0244545	DOWN	trans	ENSRNOG00000050828	Vkorc1	vitamin K epoxide reductase complex, subunit 1 [Source:RGD Symbol;Acc:1303107]	1:199337138-199341302	4.20434	3.60197	4.07973	3.74804	4.26384	4.02718	3.96201	4.01302	0.0184545	0.913292	1	-
NONRATT015586.2	2:198421226-198422243	1018	2.20952	1.62595	2.27398	0.640103	0.668773	0.511775	2.03648	0.606884	-1.74659	0.000117192	0.0244545	DOWN	trans	ENSRNOG00000011071	Nt5e	5' nucleotidase, ecto [Source:RGD Symbol;Acc:61956]	8:95968652-96012696	7.28731	6.68404	8.96028	10.8055	8.62871	11.8296	7.64388	10.4213	0.447152	0.001417	0.0596227	-
NONRATT015586.2	2:198421226-198422243	1018	2.20952	1.62595	2.27398	0.640103	0.668773	0.511775	2.03648	0.606884	-1.74659	0.000117192	0.0244545	DOWN	trans	ENSRNOG00000018144	Depdc5	DEP domain containing 5 [Source:RGD Symbol;Acc:1311535]	14:83089000-83219464	11.3777	11.5172	11.9654	12.2709	12.3687	11.3366	11.6201	11.9921	0.0454581	0.513014	0.985627	-
NONRATT015586.2	2:198421226-198422243	1018	2.20952	1.62595	2.27398	0.640103	0.668773	0.511775	2.03648	0.606884	-1.74659	0.000117192	0.0244545	DOWN	trans	ENSRNOG00000002255	Fam162a	family with sequence similarity 162, member A [Source:RGD Symbol;Acc:1590883]	11:67618625-67646253	18.7371	19.9922	17.316	18.1739	18.7099	18.1185	18.6818	18.3341	-0.0270997	0.822931	1	-
NONRATT015586.2	2:198421226-198422243	1018	2.20952	1.62595	2.27398	0.640103	0.668773	0.511775	2.03648	0.606884	-1.74659	0.000117192	0.0244545	DOWN	trans	ENSRNOG00000006462	Ero1l	ERO1-like (S. cerevisiae) [Source:RGD Symbol;Acc:621713]	15:19619973-19655381	54.498	53.7115	54.3166	58.4765	54.2346	58.2622	54.1754	56.9911	0.0730999	0.284518	0.888216	-
NONRATT015586.2	2:198421226-198422243	1018	2.20952	1.62595	2.27398	0.640103	0.668773	0.511775	2.03648	0.606884	-1.74659	0.000117192	0.0244545	DOWN	trans	ENSRNOG00000019044	Adam30	ADAM metallopeptidase domain 30 [Source:RGD Symbol;Acc:1594713]	2:200328498-200331938	0.022763	0.0240138	0	0.0971263	0.0568321	0	0.0155923	0.0513194	1.71867	0.319252	0.90891	-
NONRATT015586.2	2:198421226-198422243	1018	2.20952	1.62595	2.27398	0.640103	0.668773	0.511775	2.03648	0.606884	-1.74659	0.000117192	0.0244545	DOWN	trans	ENSRNOG00000052023	AABR07002885.1	-	1:88374496-88387424	0.0692348	0.219044	0.223985	0.3446	0.115238	0.17687	0.170754	0.212236	0.313746	0.635619	1	-
NONRATT015586.2	2:198421226-198422243	1018	2.20952	1.62595	2.27398	0.640103	0.668773	0.511775	2.03648	0.606884	-1.74659	0.000117192	0.0244545	DOWN	trans	ENSRNOG00000025222	Pcid2	PCI domain containing 2 [Source:RGD Symbol;Acc:1307041]	16:81757582-81783047	16.8673	17.4012	17.8467	16.3976	17.3723	18.9001	17.3717	17.5567	0.0152772	0.848243	1	-
NONRATT015586.2	2:198421226-198422243	1018	2.20952	1.62595	2.27398	0.640103	0.668773	0.511775	2.03648	0.606884	-1.74659	0.000117192	0.0244545	DOWN	trans	ENSRNOG00000052506	Ak3	adenylate kinase 3 [Source:RGD Symbol;Acc:619885]	1:247144491-247169693	27.4	26.386	26.0115	25.34	28.2686	24.3047	26.5992	25.9711	-0.034473	0.770267	1	-
NONRATT015586.2	2:198421226-198422243	1018	2.20952	1.62595	2.27398	0.640103	0.668773	0.511775	2.03648	0.606884	-1.74659	0.000117192	0.0244545	DOWN	trans	ENSRNOG00000025736	Tcf23	transcription factor 23 [Source:RGD Symbol;Acc:1586500]	6:26762761-26771164	0.122241	0.110482	0.0677778	0.0931076	0.0871864	0.0955852	0.100167	0.0919597	-0.123332	1	1	-
NONRATT015586.2	2:198421226-198422243	1018	2.20952	1.62595	2.27398	0.640103	0.668773	0.511775	2.03648	0.606884	-1.74659	0.000117192	0.0244545	DOWN	trans	ENSRNOG00000039859	Dnmt1	DNA (cytosine-5-)-methyltransferase 1 [Source:RGD Symbol;Acc:620979]	8:21922515-21968495	8.43486	8.64695	9.02611	8.24561	8.68584	8.33594	8.70264	8.42246	-0.0472107	0.590708	1	-
NONRATT015586.2	2:198421226-198422243	1018	2.20952	1.62595	2.27398	0.640103	0.668773	0.511775	2.03648	0.606884	-1.74659	0.000117192	0.0244545	DOWN	trans	ENSRNOG00000003261	Usp9x	ubiquitin specific peptidase 9, X-linked [Source:RGD Symbol;Acc:1560056]	X:10510033-10630297	72.1382	70.374	71.0702	71.3707	70.7492	71.1131	71.1942	71.0777	-0.00236248	0.98844	1	-
NONRATT015586.2	2:198421226-198422243	1018	2.20952	1.62595	2.27398	0.640103	0.668773	0.511775	2.03648	0.606884	-1.74659	0.000117192	0.0244545	DOWN	trans	ENSRNOG00000019630	Hacl1	2-hydroxyacyl-CoA lyase 1 [Source:RGD Symbol;Acc:619849]	16:7714465-7758189	4.34244	3.69991	4.43553	3.91406	4.69862	4.70954	4.1593	4.44074	0.0944606	0.431382	0.976985	-
NONRATT015586.2	2:198421226-198422243	1018	2.20952	1.62595	2.27398	0.640103	0.668773	0.511775	2.03648	0.606884	-1.74659	0.000117192	0.0244545	DOWN	trans	ENSRNOG00000001187	Oasl	2'-5'-oligoadenylate synthetase-like [Source:RGD Symbol;Acc:1308586]	12:47444104-47456894	0.228057	0.0601093	0.221289	0.030405	0.142328	0.468117	0.169818	0.213617	0.331033	0.75242	1	-
MSTRG.12069.7	17:89394648-89453634	871	0.704262	0	0.455599	12.719	6.35095	5.29787	0.38662	8.12259	4.39295	2.9914e-10	4.6608e-07	UP	cis	ENSRNOG00000028913	LOC688970	similar to serine/threonine kinase [Source:RGD Symbol;Acc:1582937]	17:89452814-89454038	0	0	0	0	0.208263	0	0	0.0694211	Inf	0.522599	0.985627	-
NONRATT021062.2	4:183656065-183665754	1443	0.755761	0	0.916685	0	0	0	0.557482	0	#NAME?	5.96917e-05	0.014382	DOWN	cis	ENSRNOG00000036918	Mettl20	methyltransferase like 20 [Source:RGD Symbol;Acc:735147]	4:183656013-183665754	2.34285	2.4704	1.70505	3.22722	1.94956	2.56471	2.17277	2.5805	0.248116	0.328439	0.91353	-
ENSRNOT00000090050	20:3403204-3403731	528	4.00182	3.95267	0	0	0	0	2.6515	0	#NAME?	6.90029e-06	0.00253252	DOWN	cis	ENSRNOG00000000816	Ppp1r18	protein phosphatase 1, regulatory subunit 18 [Source:RGD Symbol;Acc:1309543]	20:3372413-3397039	1.13095	4.36283	4.17559	4.08888	3.78731	3.83493	3.22312	3.90371	0.276386	0.417585	0.969608	-
NONRATT019160.2	3:10222272-10226930	954	3.42945	0.905226	4.22905	0.683045	0.535229	0.780188	2.85457	0.666154	-2.09935	0.000347489	0.0498231	DOWN	cis	ENSRNOG00000009139	Fubp3	far upstream element (FUSE) binding protein 3 [Source:RGD Symbol;Acc:1307004]	3:10222381-10269721	21.9464	20.1868	20.564	20.225	21.1165	22.0587	20.8991	21.1334	0.0160852	0.836403	1	-
NONRATT028173.2	8:128849728-128850365	638	173.393	20.9805	143.682	12.0299	15.8734	1.74986	112.685	9.88438	-3.511	3.18133e-05	0.00874715	DOWN	cis	ENSRNOG00000018700	Mobp	myelin-associated oligodendrocyte basic protein [Source:RGD Symbol;Acc:3101]	8:128824508-128850358	239.927	251.487	212.062	217.964	233.72	233.99	234.492	228.558	-0.0369798	0.668086	1	-
NONRATT023144.2	5:57055064-57059725	420	6.49153	2.22747	0	0	0	0	2.90633	0	#NAME?	2.47527e-05	0.00732274	DOWN	cis	ENSRNOG00000007671	Smu1	smu-1 suppressor of mec-8 and unc-52 homolog (C. elegans) [Source:RGD Symbol;Acc:620694]	5:57042705-57061365	43.263	45.3908	45.535	50.0431	47.9764	45.3317	44.7296	47.7837	0.0952895	0.204481	0.821359	-
NONRATT007148.2	11:83921583-83926546	670	0	0	0.394819	10.0504	3.42946	2.33278	0.131606	5.27089	5.32375	1.99709e-09	2.74553e-06	UP	cis	ENSRNOG00000001719	Psmd2	proteasome (prosome, macropain) 26S subunit, non-ATPase, 2 [Source:RGD Symbol;Acc:1305752]	11:83934087-83944763	74.6691	74.4718	71.2435	72.143	73.3859	74.3756	73.4615	73.3015	-0.00314431	0.999973	1	-
NONRATT025198.2	6:108876163-108897184	846	0.966792	0	1.25088	0	0	0	0.739225	0	#NAME?	0.000181727	0.0320263	DOWN	cis	ENSRNOG00000027317	Ylpm1	YLP motif containing 1 [Source:RGD Symbol;Acc:1564946]	6:108820774-108897426	20.971	20.1276	20.9198	20.511	18.946	19.4603	20.6728	19.6391	-0.0740036	0.307973	0.900519	-
NONRATT000579.2	1:88875447-88879305	669	0.40756	0.64543	0.69209	2.70573	1.7809	3.33755	0.581694	2.60806	2.16465	4.49636e-05	0.011676	UP	cis	ENSRNOG00000025111	Nfkbid	nuclear factor of kappa light polypeptide gene enhancer in B-cells inhibitor, delta [Source:RGD Symbol;Acc:1308055]	1:88885937-88892615	0.905402	0.636449	0.836726	0.367826	0.322882	0.566368	0.792859	0.419026	-0.920026	0.0228185	0.326762	-
NONRATT031141.2	X:105351451-105359924	1687	0	0	0	0	6.75979	0	0	2.25326	Inf	0.000287346	0.0436075	UP	cis	ENSRNOG00000011226	Timm8a1	translocase of inner mitochondrial membrane 8 homolog A1 (yeast) [Source:EntrezGene;Acc:84383]	X:105352402-105355716	9.79228	12.2505	10.3075	10.9739	4.97184	10.9014	10.7834	8.94905	-0.269006	0.345243	0.931959	-
NONRATT013451.2	18:52353372-52355955	400	5.62323	1.97908	6.94463	0.54296	0.425507	1.30247	4.84898	0.756978	-2.67936	3.96166e-05	0.0104031	DOWN	cis	ENSRNOG00000013674	Megf10	multiple EGF-like domains 10 [Source:RGD Symbol;Acc:735084]	18:52215682-52366238	23.4512	24.1201	22.8061	21.7828	26.5358	22.4279	23.4592	23.5822	0.0075438	0.903566	1	-
NONRATT001649.2	1:247108082-247138155	1773	5.99721	0	0	0	0	0	1.99907	0	#NAME?	0.000306729	0.0451387	DOWN	cis	ENSRNOG00000010967	Cdc37l1	cell division cycle 37-like 1 [Source:RGD Symbol;Acc:1309295]	1:247107397-247138155	27.648	25.121	26.022	30.6194	28.2429	32.5595	26.2637	30.4739	0.214507	0.00657678	0.160698	-
MSTRG.12072.1	17:89407926-89462591	1832	0.446455	0	1.01086	7.43036	6.45702	3.9813	0.485773	5.95623	3.61605	3.87875e-06	0.00156294	UP	cis	ENSRNOG00000028913	LOC688970	similar to serine/threonine kinase [Source:RGD Symbol;Acc:1582937]	17:89452814-89454038	0	0	0	0	0.208263	0	0	0.0694211	Inf	0.522599	0.985627	-
NONRATT013324.2	18:28361287-28380933	1680	0.0811482	0.0856589	0.0393545	0.818865	0.709178	1.24045	0.0687205	0.92283	3.74725	2.77071e-08	3.13583e-05	UP	cis	ENSRNOG00000059564	SNORA74	Small nucleolar RNA SNORA74 [Source:RFAM;Acc:RF00090]	18:28353093-28353204	3.49747	2.95039	2.0364	1.49202	2.6191	3.06252	2.82808	2.39121	-0.242084	1	1	-
NONRATT027255.2	7:132430852-132432796	1945	0.035046	0.0369941	0.0339926	0.260571	6.60693	3.82654	0.0353442	3.56468	6.65615	6.14929e-09	7.56395e-06	UP	cis	ENSRNOG00000015741	Slc2a13	solute carrier family 2 (facilitated glucose transporter), member 13 [Source:RGD Symbol;Acc:621814]	7:132430853-132757558	17.5724	17.214	17.9928	15.5829	14.7796	14.8652	17.593	15.0759	-0.222761	0.00240038	0.0837212	-
NONRATT012419.2	17:31400761-31403685	2925	32.4607	31.8615	30.2319	0.173269	0.203662	0.203564	31.518	0.193498	-7.34771	4.27573e-36	4.9964e-32	DOWN	cis	ENSRNOG00000039265	Psmg4	proteasome (prosome, macropain) assembly chaperone 4 [Source:RGD Symbol;Acc:1589955]	17:31404578-31411957	9.24837	10.0386	8.71032	4.93136	7.97871	11.3152	9.33242	8.07509	-0.208774	0.465879	0.985627	-
NONRATT030892.2	X:15618322-15619557	407	12.3929	0	13.8128	0.177814	0.627283	0	8.73523	0.268366	-5.02457	9.42641e-05	0.0211831	DOWN	cis	ENSRNOG00000009749	Wdr45	WD repeat domain 45 [Source:RGD Symbol;Acc:1359718]	X:15621209-15627235	14.0296	14.0665	15.1877	13.3617	16.0945	15.4914	14.4279	14.9825	0.0544154	0.615327	1	-
NONRATT021928.2	4:170914380-170931969	753	0.0905239	0	0.175694	0.0961096	1.69525	2.76753	0.0887393	1.51963	4.098	0.000308477	0.0451387	UP	cis	ENSRNOG00000005787	Erp27	endoplasmic reticulum protein 27 [Source:RGD Symbol;Acc:1565381]	4:170893946-170912629	0.155876	0.246579	0.0756724	0	0	0.0853664	0.159376	0.0284555	-2.48566	0.13357	0.713397	-
NONRATT004578.2	10:63441165-63442293	1129	0.060376	7.20293	4.21794	0.128267	0.0753777	0.263663	3.82708	0.155769	-4.61876	2.59515e-05	0.00748781	DOWN	cis	ENSRNOG00000003971	Gosr1	golgi SNAP receptor complex member 1 [Source:RGD Symbol;Acc:71093]	10:63405586-63442250	18.088	18.4394	18.2406	18.4551	18.4433	19.4623	18.256	18.7869	0.0413589	0.559932	0.997192	-
MSTRG.17229.10	3:52645245-52660934	15644	0	0	7.74529	0	0	0	2.58176	0	#NAME?	0.000109431	0.0232502	DOWN	cis	ENSRNOG00000006639	Scn9a	sodium channel, voltage-gated, type IX, alpha subunit [Source:RGD Symbol;Acc:69368]	3:52583951-52664209	2.12684	2.21147	2.98106	2.55165	2.31365	2.16657	2.43979	2.34396	-0.0578115	0.705393	1	-
NONRATT021122.2	4:8212207-8255519	1376	0	0	0	0.789292	0.247388	1.13587	0	0.724184	Inf	1.03613e-07	7.12216e-05	UP	cis	ENSRNOG00000021614	Kmt2e	lysine (K)-specific methyltransferase 2E [Source:RGD Symbol;Acc:1309641]	4:8187751-8255514	19.5493	20.3699	19.3459	20.3554	20.3746	19.5575	19.755	20.0958	0.024676	0.679387	1	-
NONRATT003558.2	1:225925942-225937826	1901	0.466107	0	1.46126	0	0	0	0.642455	0	#NAME?	2.76201e-05	0.00777723	DOWN	cis	ENSRNOG00000032929	Incenp	inner centromere protein [Source:RGD Symbol;Acc:1305292]	1:225925773-225952516	2.79516	2.88876	2.83807	2.82293	2.84194	2.75591	2.84066	2.80693	-0.0172371	0.940035	1	-
NONRATT023570.2	5:140107145-140108199	1055	0.452276	0.136405	0.125401	12.0792	0.16133	11.6402	0.238027	7.96022	5.06361	5.34378e-06	0.00201435	UP	cis	ENSRNOG00000027921	Rlf	rearranged L-myc fusion [Source:RGD Symbol;Acc:1305297]	5:140107275-140162642	15.802	15.3554	14.9829	15.888	16.1787	15.8994	15.3801	15.9887	0.0559883	0.42314	0.971943	-
NONRATT005910.2	10:82841522-82852738	656	15.7933	18.5399	18.753	0	0	0	17.6954	0	#NAME?	1.56898e-27	9.16717e-24	DOWN	cis	ENSRNOG00000004276	Itga3	integrin, alpha 3 [Source:RGD Symbol;Acc:1310333]	10:82855613-82887497	11.5053	11.1425	12.9279	11.1599	10.1898	11.0225	11.8586	10.7907	-0.136139	0.140194	0.722751	-
NONRATT028621.2	8:44155846-44159016	2861	2.95418	1.66016	5.36328	0.0252955	0.267708	0.0520359	3.32587	0.115013	-4.85386	1.29317e-10	2.15877e-07	DOWN	cis	ENSRNOG00000057221	Scn3b	Sodium channel subunit beta-3 [Source:UniProtKB/Swiss-Prot;Acc:Q9JK00]	8:44136496-44159010	27.2754	30.4819	29.8318	29.6678	26.2193	25.9965	29.1964	27.2946	-0.0971755	0.248716	0.866649	-
NONRATT016788.2	2:211344017-211344442	426	0.16001	0.168905	45.0245	0.169884	0.199769	0.174735	15.1178	0.181463	-6.38043	0.000202741	0.0340881	DOWN	cis	ENSRNOG00000034161	Cox6b1	cytochrome c oxidase subunit VIb polypeptide 1 [Source:RGD Symbol;Acc:1584097]	2:211337271-211337531	51.3253	52.5369	46.018	40.9713	39.3374	39.4288	49.9601	39.9125	-0.323935	0.0238106	0.334049	-
NONRATT026298.2	7:142238799-142243185	736	0	0	0	18.1999	0	0	0	6.06665	Inf	0.000174136	0.0310667	UP	cis	ENSRNOG00000048932	Smagp	small cell adhesion glycoprotein [Source:RGD Symbol;Acc:727777]	7:142244295-142260896	0.261843	0.607364	0.660564	1.0052	0.653607	0.859883	0.509923	0.839565	0.719361	0.0824568	0.593219	-
NONRATT020543.2	4:99133835-99146147	773	15.2546	11.8235	5.13368	1.77968	0.110092	1.92565	10.7373	1.27181	-3.07768	9.55028e-06	0.00343384	DOWN	cis	ENSRNOG00000007124	Krcc1	lysine-rich coiled-coil 1 [Source:RGD Symbol;Acc:1306495]	4:99133842-99146827	14.6673	14.0318	14.9866	14.3468	12.9122	13.6106	14.5619	13.6232	-0.0961306	0.407927	0.963081	-
MSTRG.24823.4	7:93128933-93141631	10231	2.36506	0	3.11594	0	0	0	1.827	0	#NAME?	7.52037e-08	5.49245e-05	DOWN	cis	ENSRNOG00000061079	SNORA17	Small nucleolar RNA SNORA17 [Source:RFAM;Acc:RF00560]	7:93146477-93146598	12.8425	14.8953	11.839	13.6958	12.0221	14.0589	13.1923	13.2589	0.00726885	1	1	-
NONRATT005366.2	10:29357389-29367841	511	0	0	0	2.12537	0	4.80638	0	2.31059	Inf	1.6577e-05	0.00530714	UP	cis	ENSRNOG00000003980	Ttc1	tetratricopeptide repeat domain 1 [Source:RGD Symbol;Acc:1359604]	10:29342495-29367865	47.2762	49.0438	44.18	40.8691	48.039	48.1079	46.8333	45.672	-0.0362256	0.727455	1	-
MSTRG.24456.3	7:47571933-47579678	7579	1.50189	0	0	0	0	0	0.500628	0	#NAME?	0.000296767	0.0444599	DOWN	cis	ENSRNOG00000004585	Tmtc2	transmembrane and tetratricopeptide repeat containing 2 [Source:RGD Symbol;Acc:1309848]	7:47181981-47586137	11.9632	14.4588	13.3667	14.1903	13.5678	16.0368	13.2629	14.5983	0.138403	0.194859	0.809604	-
NONRATT017137.2	20:5354224-5418017	529	0.515421	0.408054	0	2.8743	0.965233	2.25113	0.307825	2.03022	2.72146	0.000214696	0.0350885	UP	cis	ENSRNOG00000038999	RT1-A1	RT1 class Ia, locus A1 [Source:RGD Symbol;Acc:1595924]	20:5351605-5421098	0.16624	0.32135	0.376394	0.221596	0.224781	0.13648	0.287995	0.194286	-0.567862	0.174771	0.77837	-
NONRATT009419.2	14:71437010-71452244	607	5.38994	6.28366	4.24949	0.357799	0.4206	1.96186	5.30769	0.91342	-2.53874	9.93457e-06	0.00351789	DOWN	cis	ENSRNOG00000003174	Tapt1	transmembrane anterior posterior transformation 1 [Source:RGD Symbol;Acc:1309656]	14:71424083-71462618	21.5437	22.6062	22.649	20.8133	21.7524	21.4337	22.2663	21.3331	-0.0617663	0.44447	0.985627	-
NONRATT018312.2	3:71037564-71044961	551	0	0	0	1.18262	0.926694	0.94553	0	1.01828	Inf	1.04274e-06	0.000487396	UP	cis	ENSRNOG00000005256	Zc3h15	zinc finger CCCH-type containing 15 [Source:RGD Symbol;Acc:1359234]	3:71020534-71040157	35.2544	35.9001	36.6288	40.3382	31.3621	33.0919	35.9278	34.9307	-0.0406023	0.706059	1	-
MSTRG.4165.1	10:43451932-43456469	3322	2.70836	0	3.52398	0	0	0	2.07744	0	#NAME?	2.22707e-07	0.000130122	DOWN	cis	ENSRNOG00000031544	Larp1	La ribonucleoprotein domain family, member 1 [Source:RGD Symbol;Acc:1306683]	10:43446526-43498066	54.28	54.4796	51.308	51.0248	53.8444	52.5933	53.3559	52.4875	-0.0236724	0.773353	1	-
MSTRG.20487.1	5:15780036-15787619	7321	0	2.54596	1.67133	0	0	0	1.40576	0	#NAME?	1.59529e-07	0.000100766	DOWN	cis	ENSRNOG00000027276	Xkr4	XK, Kell blood group complex subunit-related family, member 4 [Source:RGD Symbol;Acc:1549780]	5:15747614-16140896	12.8952	13.7247	14.9375	14.0527	14.5365	13.7636	13.8525	14.1176	0.0273486	0.785986	1	-
MSTRG.12069.9	17:89436316-89453608	1604	0.212483	0	0.742194	4.55926	4.35062	2.18082	0.318226	3.6969	3.53819	1.70924e-06	0.000726301	UP	cis	ENSRNOG00000028913	LOC688970	similar to serine/threonine kinase [Source:RGD Symbol;Acc:1582937]	17:89452814-89454038	0	0	0	0	0.208263	0	0	0.0694211	Inf	0.522599	0.985627	-
NONRATT004037.2	10:730277-750521	838	0.406709	0.429402	0.71031	0	0	0	0.515474	0	#NAME?	2.42307e-05	0.00726019	DOWN	cis	ENSRNOG00000053230	Fopnl	FGFR1OP N-terminal like [Source:RGD Symbol;Acc:1305823]	10:730247-751061	16.2062	15.4987	16.2483	18.4311	15.8601	17.9767	15.9844	17.4226	0.124299	0.248134	0.866649	-
NONRATT005011.2	10:97680659-97683273	2615	0.417042	0.41279	0.45525	22.9818	0.520697	23.9075	0.428361	15.8033	5.20526	3.2782e-07	0.000174124	UP	cis	ENSRNOG00000036745	Gna13	guanine nucleotide binding protein (G protein), alpha 13 [Source:RGD Symbol;Acc:1310221]	10:97647111-97684730	27.6637	27.8216	28.353	27.9976	26.7484	29.8362	27.9461	28.1941	0.0127468	0.821848	1	-
NONRATT014176.2	19:32295508-32312372	733	0.557963	0.687239	1.17304	2.96344	2.0898	5.78763	0.806079	3.61363	2.16445	8.74008e-05	0.0200259	UP	cis	ENSRNOG00000011618	Mmaa	methylmalonic aciduria (cobalamin deficiency) cblA type [Source:RGD Symbol;Acc:1305035]	19:32308236-32325927	4.46422	4.56544	4.48848	4.87549	5.94143	4.82811	4.50605	5.21501	0.210807	0.12144	0.697125	-
NONRATT015195.2	2:115351332-115352788	1457	0.280705	0.246973	43.6692	0.198783	0.233635	0.255396	14.7323	0.229271	-6.00578	9.76856e-05	0.0213365	DOWN	cis	ENSRNOG00000011859	Eif5a2	eukaryotic translation initiation factor 5A2 [Source:RGD Symbol;Acc:1306196]	2:115337439-115354203	42.3457	42.7854	44.3681	42.792	44.364	48.5214	43.1664	45.2258	0.0672381	0.338306	0.923438	-
MSTRG.15011.1	2:183168381-183171954	3554	0	0	0	6.72316	0	9.23524	0	5.31947	Inf	3.33815e-08	3.39199e-05	UP	cis	ENSRNOG00000010124	Trim2	tripartite motif-containing 2 [Source:RGD Symbol;Acc:1310981]	2:183145089-183213228	59.7148	55.7644	55.856	59.6577	62.4137	65.6486	57.1117	62.5733	0.131761	0.0594866	0.512596	-
NONRATT004060.2	10:13153815-13156163	2349	0.20313	0.245083	0.197109	209.945	0.253601	0.25348	0.215107	70.1506	8.34926	1.83084e-05	0.00570516	UP	cis	ENSRNOG00000058561	Srrm2	serine/arginine repetitive matrix 2 [Source:RGD Symbol;Acc:1310163]	10:13145099-13162343	150.214	158.188	152.362	166.613	157.057	152.94	153.588	158.87	0.0487812	0.417781	0.969836	-
MSTRG.18145.1	3:146435386-146436674	1267	0	0	0	4.51468	5.70932	5.52176	0	5.24859	Inf	2.03946e-23	6.80916e-20	UP	cis	ENSRNOG00000007102	Acss1	acyl-CoA synthetase short-chain family member 1 [Source:RGD Symbol;Acc:1306246]	3:146420346-146470293	19.0018	19.8064	16.8528	27.5378	19.9643	25.9062	18.5536	24.4694	0.399278	0.000388577	0.0238649	-
