# Supplementary material for: LncRNAs down-regulate Myh1, Casr, and Mis18a expression in the Substantia Nigra of aged male rats
Source: Aging (Albany NY). 2019 Oct 2;11(19):8313–28. doi: 10.18632/aging.102321 (PMC6814601; doi:10.18632/aging.102321)
Supplement: Supplementary Table 11 [file aging-11-102321-s006.xlsx]

## Sheet: Table 11
levels	GO_id	Term	GO_namespace	gene_num	gene_list
2	GO:0005215	transporter activity	molecular_function	20	ENSRNOG00000013610,ENSRNOG00000026488,ENSRNOG00000004555,ENSRNOG00000051711,ENSRNOG00000009076,ENSRNOG00000001427,ENSRNOG00000006639,ENSRNOG00000052968,ENSRNOG00000057221,ENSRNOG00000045524,ENSRNOG00000017383,ENSRNOG00000001285,ENSRNOG00000005491,ENSRNOG00000005957,ENSRNOG00000034161,ENSRNOG00000015741,ENSRNOG00000059765,ENSRNOG00000020444,ENSRNOG00000000457,ENSRNOG00000015746,
2	GO:0044422	organelle part	cellular_component	114	ENSRNOG00000007629,ENSRNOG00000004158,ENSRNOG00000032034,ENSRNOG00000007203,ENSRNOG00000000841,ENSRNOG00000004585,ENSRNOG00000016953,ENSRNOG00000060320,ENSRNOG00000010999,ENSRNOG00000014409,ENSRNOG00000047620,ENSRNOG00000014584,ENSRNOG00000052968,ENSRNOG00000031544,ENSRNOG00000011226,ENSRNOG00000018144,ENSRNOG00000053269,ENSRNOG00000027434,ENSRNOG00000016983,ENSRNOG00000060693,ENSRNOG00000007504,…
2	GO:0040011	locomotion	biological_process	18	ENSRNOG00000031162,ENSRNOG00000004158,ENSRNOG00000049115,ENSRNOG00000015602,ENSRNOG00000008065,ENSRNOG00000009348,ENSRNOG00000036745,ENSRNOG00000014628,ENSRNOG00000004276,ENSRNOG00000019220,ENSRNOG00000002265,ENSRNOG00000009184,ENSRNOG00000002215,ENSRNOG00000026702,ENSRNOG00000030118,ENSRNOG00000033101,ENSRNOG00000003261,ENSRNOG00000013166,
2	GO:0000003	reproduction	biological_process	12	ENSRNOG00000000417,ENSRNOG00000014584,ENSRNOG00000013166,ENSRNOG00000004276,ENSRNOG00000009571,ENSRNOG00000000934,ENSRNOG00000012358,ENSRNOG00000006965,ENSRNOG00000009348,ENSRNOG00000015734,ENSRNOG00000005616,ENSRNOG00000060320,
2	GO:0048518	positive regulation of biological process	biological_process	77	ENSRNOG00000047620,ENSRNOG00000060320,ENSRNOG00000010999,ENSRNOG00000000841,ENSRNOG00000007203,ENSRNOG00000032034,ENSRNOG00000004158,ENSRNOG00000020377,ENSRNOG00000011321,ENSRNOG00000002593,ENSRNOG00000031544,ENSRNOG00000019318,ENSRNOG00000048932,ENSRNOG00000021614,ENSRNOG00000016448,ENSRNOG00000019653,ENSRNOG00000009184,ENSRNOG00000019220,ENSRNOG00000027434,ENSRNOG00000003298,ENSRNOG00000012818,…
2	GO:0030054	cell junction	cellular_component	17	ENSRNOG00000002215,ENSRNOG00000016983,ENSRNOG00000048932,ENSRNOG00000030118,ENSRNOG00000017383,ENSRNOG00000001285,ENSRNOG00000026702,ENSRNOG00000013171,ENSRNOG00000007744,ENSRNOG00000015602,ENSRNOG00000059801,ENSRNOG00000013610,ENSRNOG00000036745,ENSRNOG00000025757,ENSRNOG00000011228,ENSRNOG00000026466,ENSRNOG00000004276,
2	GO:0045182	translation regulator activity	molecular_function	1	ENSRNOG00000031544,
2	GO:0065007	biological regulation	biological_process	158	ENSRNOG00000025111,ENSRNOG00000006462,ENSRNOG00000002827,ENSRNOG00000047080,ENSRNOG00000001719,ENSRNOG00000018009,ENSRNOG00000015746,ENSRNOG00000019629,ENSRNOG00000001285,ENSRNOG00000002866,ENSRNOG00000039859,ENSRNOG00000054385,ENSRNOG00000026702,ENSRNOG00000011859,ENSRNOG00000006639,ENSRNOG00000014265,ENSRNOG00000018714,ENSRNOG00000003971,ENSRNOG00000000230,ENSRNOG00000000394,ENSRNOG00000012436,…
2	GO:0031386	protein tag	molecular_function	1	ENSRNOG00000016133,
2	GO:0031974	membrane-enclosed lumen	cellular_component	55	ENSRNOG00000007887,ENSRNOG00000002509,ENSRNOG00000016133,ENSRNOG00000004019,ENSRNOG00000008424,ENSRNOG00000009826,ENSRNOG00000027317,ENSRNOG00000011975,ENSRNOG00000032224,ENSRNOG00000001187,ENSRNOG00000001073,ENSRNOG00000008405,ENSRNOG00000019727,ENSRNOG00000022939,ENSRNOG00000008619,ENSRNOG00000031916,ENSRNOG00000001426,ENSRNOG00000000956,ENSRNOG00000000417,ENSRNOG00000019830,ENSRNOG00000011663,…
2	GO:0044456	synapse part	cellular_component	14	ENSRNOG00000016448,ENSRNOG00000011071,ENSRNOG00000013610,ENSRNOG00000014409,ENSRNOG00000019629,ENSRNOG00000020444,ENSRNOG00000002265,ENSRNOG00000014083,ENSRNOG00000013171,ENSRNOG00000004276,ENSRNOG00000010649,ENSRNOG00000018009,ENSRNOG00000009783,ENSRNOG00000026466,
2	GO:0009987	cellular process	biological_process	222	ENSRNOG00000031544,ENSRNOG00000052968,ENSRNOG00000052061,ENSRNOG00000018144,ENSRNOG00000021200,ENSRNOG00000002593,ENSRNOG00000005193,ENSRNOG00000007203,ENSRNOG00000011321,ENSRNOG00000008865,ENSRNOG00000020377,ENSRNOG00000060320,ENSRNOG00000010999,ENSRNOG00000013610,ENSRNOG00000010169,ENSRNOG00000016953,ENSRNOG00000016825,ENSRNOG00000038184,ENSRNOG00000054989,ENSRNOG00000011885,ENSRNOG00000012818,…
2	GO:0003824	catalytic activity	molecular_function	101	ENSRNOG00000019630,ENSRNOG00000028913,ENSRNOG00000057934,ENSRNOG00000005711,ENSRNOG00000011071,ENSRNOG00000036745,ENSRNOG00000046276,ENSRNOG00000009620,ENSRNOG00000005749,ENSRNOG00000001189,ENSRNOG00000011663,ENSRNOG00000039829,ENSRNOG00000018574,ENSRNOG00000014628,ENSRNOG00000054724,ENSRNOG00000016655,ENSRNOG00000033206,ENSRNOG00000049695,ENSRNOG00000022268,ENSRNOG00000033101,ENSRNOG00000025360,…
2	GO:0000988	transcription factor activity, protein binding	molecular_function	7	ENSRNOG00000005616,ENSRNOG00000015734,ENSRNOG00000013166,ENSRNOG00000004730,ENSRNOG00000021614,ENSRNOG00000008065,ENSRNOG00000004300,
2	GO:0044464	cell part	cellular_component	230	ENSRNOG00000027787,ENSRNOG00000038720,ENSRNOG00000001453,ENSRNOG00000008022,ENSRNOG00000029115,ENSRNOG00000013171,ENSRNOG00000013557,ENSRNOG00000015787,ENSRNOG00000007408,ENSRNOG00000024194,ENSRNOG00000003622,ENSRNOG00000005256,ENSRNOG00000020482,ENSRNOG00000010649,ENSRNOG00000004300,ENSRNOG00000032703,ENSRNOG00000036866,ENSRNOG00000010572,ENSRNOG00000006965,ENSRNOG00000004345,ENSRNOG00000001134,…
2	GO:0044217	other organism part	cellular_component	1	ENSRNOG00000000457,
2	GO:0032991	macromolecular complex	cellular_component	68	ENSRNOG00000001339,ENSRNOG00000008065,ENSRNOG00000058561,ENSRNOG00000038999,ENSRNOG00000019165,ENSRNOG00000025423,ENSRNOG00000004276,ENSRNOG00000026762,ENSRNOG00000001073,ENSRNOG00000024266,ENSRNOG00000032224,ENSRNOG00000000457,ENSRNOG00000024178,ENSRNOG00000004158,ENSRNOG00000007629,ENSRNOG00000032034,ENSRNOG00000011321,ENSRNOG00000007203,ENSRNOG00000000841,ENSRNOG00000013610,ENSRNOG00000060320,…
2	GO:0022414	reproductive process	biological_process	12	ENSRNOG00000014584,ENSRNOG00000000417,ENSRNOG00000013166,ENSRNOG00000004276,ENSRNOG00000009571,ENSRNOG00000000934,ENSRNOG00000012358,ENSRNOG00000006965,ENSRNOG00000009348,ENSRNOG00000015734,ENSRNOG00000060320,ENSRNOG00000005616,
2	GO:0009295	nucleoid	cellular_component	2	ENSRNOG00000014935,ENSRNOG00000019817,
2	GO:0098754	detoxification	biological_process	1	ENSRNOG00000009348,
2	GO:0001071	nucleic acid binding transcription factor activity	molecular_function	13	ENSRNOG00000009184,ENSRNOG00000005616,ENSRNOG00000027317,ENSRNOG00000019653,ENSRNOG00000009139,ENSRNOG00000000308,ENSRNOG00000054989,ENSRNOG00000020482,ENSRNOG00000007887,ENSRNOG00000002593,ENSRNOG00000004730,ENSRNOG00000016683,ENSRNOG00000007408,
2	GO:0009055	electron carrier activity	molecular_function	2	ENSRNOG00000003622,ENSRNOG00000034161,
2	GO:0005488	binding	molecular_function	236	ENSRNOG00000013336,ENSRNOG00000022939,ENSRNOG00000008619,ENSRNOG00000025423,ENSRNOG00000000308,ENSRNOG00000007023,ENSRNOG00000009571,ENSRNOG00000001427,ENSRNOG00000048138,ENSRNOG00000031162,ENSRNOG00000000633,ENSRNOG00000012264,ENSRNOG00000042029,ENSRNOG00000038999,ENSRNOG00000011228,ENSRNOG00000048861,ENSRNOG00000009139,ENSRNOG00000015229,ENSRNOG00000028662,ENSRNOG00000024178,ENSRNOG00000020167,…
2	GO:0071840	cellular component organization or biogenesis	biological_process	86	ENSRNOG00000031162,ENSRNOG00000007744,ENSRNOG00000027091,ENSRNOG00000009571,ENSRNOG00000004276,ENSRNOG00000006523,ENSRNOG00000001073,ENSRNOG00000011975,ENSRNOG00000032224,ENSRNOG00000024266,ENSRNOG00000002215,ENSRNOG00000027317,ENSRNOG00000030118,ENSRNOG00000017383,ENSRNOG00000024178,ENSRNOG00000002509,ENSRNOG00000020377,ENSRNOG00000011321,ENSRNOG00000004158,ENSRNOG00000007203,ENSRNOG00000000841,…
2	GO:0044425	membrane part	cellular_component	90	ENSRNOG00000019208,ENSRNOG00000021200,ENSRNOG00000053269,ENSRNOG00000011321,ENSRNOG00000004585,ENSRNOG00000004555,ENSRNOG00000016953,ENSRNOG00000013610,ENSRNOG00000049019,ENSRNOG00000006082,ENSRNOG00000003298,ENSRNOG00000027434,ENSRNOG00000012324,ENSRNOG00000013674,ENSRNOG00000060693,ENSRNOG00000048932,ENSRNOG00000019318,ENSRNOG00000008619,ENSRNOG00000005568,ENSRNOG00000019044,ENSRNOG00000001427,…
2	GO:0050896	response to stimulus	biological_process	108	ENSRNOG00000007203,ENSRNOG00000000841,ENSRNOG00000032034,ENSRNOG00000004158,ENSRNOG00000020377,ENSRNOG00000011321,ENSRNOG00000008865,ENSRNOG00000013610,ENSRNOG00000060320,ENSRNOG00000031544,ENSRNOG00000052061,ENSRNOG00000001811,ENSRNOG00000019208,ENSRNOG00000018144,ENSRNOG00000021200,ENSRNOG00000005193,ENSRNOG00000002593,ENSRNOG00000027592,ENSRNOG00000009184,ENSRNOG00000016983,ENSRNOG00000019220,…
2	GO:0048519	negative regulation of biological process	biological_process	52	ENSRNOG00000027592,ENSRNOG00000009184,ENSRNOG00000019653,ENSRNOG00000016448,ENSRNOG00000001285,ENSRNOG00000058940,ENSRNOG00000001050,ENSRNOG00000039859,ENSRNOG00000047080,ENSRNOG00000038184,ENSRNOG00000020482,ENSRNOG00000025111,ENSRNOG00000006462,ENSRNOG00000024194,ENSRNOG00000049137,ENSRNOG00000004158,ENSRNOG00000032034,ENSRNOG00000000841,ENSRNOG00000009348,ENSRNOG00000060320,ENSRNOG00000005616,…
2	GO:0004871	signal transducer activity	molecular_function	15	ENSRNOG00000021200,ENSRNOG00000019208,ENSRNOG00000003298,ENSRNOG00000013171,ENSRNOG00000002593,ENSRNOG00000008619,ENSRNOG00000047080,ENSRNOG00000025423,ENSRNOG00000002549,ENSRNOG00000036745,ENSRNOG00000002011,ENSRNOG00000013610,ENSRNOG00000017181,ENSRNOG00000049115,ENSRNOG00000002265,
2	GO:0098772	molecular function regulator	molecular_function	17	ENSRNOG00000014083,ENSRNOG00000011560,ENSRNOG00000057221,ENSRNOG00000032703,ENSRNOG00000001719,ENSRNOG00000038184,ENSRNOG00000025406,ENSRNOG00000016133,ENSRNOG00000013171,ENSRNOG00000008022,ENSRNOG00000001453,ENSRNOG00000028946,ENSRNOG00000010794,ENSRNOG00000017181,ENSRNOG00000026748,ENSRNOG00000001426,ENSRNOG00000018144,
2	GO:0001906	cell killing	biological_process	5	ENSRNOG00000048932,ENSRNOG00000000457,ENSRNOG00000038999,ENSRNOG00000049115,ENSRNOG00000019629,
2	GO:0016020	membrane	cellular_component	123	ENSRNOG00000016953,ENSRNOG00000013610,ENSRNOG00000047620,ENSRNOG00000049019,ENSRNOG00000011321,ENSRNOG00000004555,ENSRNOG00000004585,ENSRNOG00000019208,ENSRNOG00000053269,ENSRNOG00000018144,ENSRNOG00000021200,ENSRNOG00000031544,ENSRNOG00000013674,ENSRNOG00000060693,ENSRNOG00000058940,ENSRNOG00000019318,ENSRNOG00000048932,ENSRNOG00000027434,ENSRNOG00000019220,ENSRNOG00000012324,ENSRNOG00000027592,…
2	GO:0044421	extracellular region part	cellular_component	46	ENSRNOG00000005193,ENSRNOG00000018326,ENSRNOG00000000394,ENSRNOG00000021200,ENSRNOG00000011321,ENSRNOG00000036760,ENSRNOG00000005616,ENSRNOG00000008064,ENSRNOG00000047080,ENSRNOG00000001719,ENSRNOG00000018009,ENSRNOG00000012037,ENSRNOG00000013557,ENSRNOG00000038720,ENSRNOG00000008022,ENSRNOG00000019629,ENSRNOG00000012324,ENSRNOG00000021614,ENSRNOG00000007023,ENSRNOG00000000417,ENSRNOG00000001426,…
2	GO:0002376	immune system process	biological_process	28	ENSRNOG00000031162,ENSRNOG00000011321,ENSRNOG00000049115,ENSRNOG00000038999,ENSRNOG00000017181,ENSRNOG00000025222,ENSRNOG00000000308,ENSRNOG00000004730,ENSRNOG00000026762,ENSRNOG00000019629,ENSRNOG00000012965,ENSRNOG00000001187,ENSRNOG00000002215,ENSRNOG00000011975,ENSRNOG00000032224,ENSRNOG00000009184,ENSRNOG00000021614,ENSRNOG00000026702,ENSRNOG00000001050,ENSRNOG00000048932,ENSRNOG00000030118,…
2	GO:0005576	extracellular region	cellular_component	47	ENSRNOG00000005616,ENSRNOG00000008064,ENSRNOG00000036760,ENSRNOG00000011321,ENSRNOG00000021200,ENSRNOG00000005193,ENSRNOG00000018326,ENSRNOG00000000394,ENSRNOG00000021614,ENSRNOG00000012324,ENSRNOG00000019629,ENSRNOG00000038720,ENSRNOG00000008022,ENSRNOG00000013557,ENSRNOG00000012037,ENSRNOG00000001719,ENSRNOG00000047080,ENSRNOG00000018009,ENSRNOG00000005711,ENSRNOG00000036745,ENSRNOG00000011071,…
2	GO:0022610	biological adhesion	biological_process	17	ENSRNOG00000009184,ENSRNOG00000019220,ENSRNOG00000048932,ENSRNOG00000030118,ENSRNOG00000026702,ENSRNOG00000013674,ENSRNOG00000025111,ENSRNOG00000010649,ENSRNOG00000016632,ENSRNOG00000013166,ENSRNOG00000049137,ENSRNOG00000015602,ENSRNOG00000049115,ENSRNOG00000011071,ENSRNOG00000017181,ENSRNOG00000026762,ENSRNOG00000004276,
2	GO:0032502	developmental process	biological_process	81	ENSRNOG00000003261,ENSRNOG00000054989,ENSRNOG00000018700,ENSRNOG00000049137,ENSRNOG00000009184,ENSRNOG00000016983,ENSRNOG00000027434,ENSRNOG00000019318,ENSRNOG00000001050,ENSRNOG00000021614,ENSRNOG00000016448,ENSRNOG00000013674,ENSRNOG00000014584,ENSRNOG00000000841,ENSRNOG00000004158,ENSRNOG00000060320,ENSRNOG00000004019,ENSRNOG00000002215,ENSRNOG00000032224,ENSRNOG00000017383,ENSRNOG00000030118,…
2	GO:0050789	regulation of biological process	biological_process	147	ENSRNOG00000009139,ENSRNOG00000028662,ENSRNOG00000011975,ENSRNOG00000032224,ENSRNOG00000002215,ENSRNOG00000001161,ENSRNOG00000000308,ENSRNOG00000025423,ENSRNOG00000008619,ENSRNOG00000048138,ENSRNOG00000009571,ENSRNOG00000031162,ENSRNOG00000038999,ENSRNOG00000000633,ENSRNOG00000003261,ENSRNOG00000003298,ENSRNOG00000019220,ENSRNOG00000020658,ENSRNOG00000016983,ENSRNOG00000027592,ENSRNOG00000019653,…
2	GO:0032501	multicellular organismal process	biological_process	89	ENSRNOG00000008619,ENSRNOG00000019830,ENSRNOG00000000308,ENSRNOG00000004276,ENSRNOG00000026762,ENSRNOG00000009571,ENSRNOG00000004730,ENSRNOG00000008065,ENSRNOG00000031162,ENSRNOG00000003174,ENSRNOG00000015734,ENSRNOG00000011820,ENSRNOG00000038999,ENSRNOG00000004019,ENSRNOG00000002215,ENSRNOG00000011975,ENSRNOG00000032224,ENSRNOG00000030118,ENSRNOG00000017383,ENSRNOG00000052061,ENSRNOG00000014584,…
2	GO:0044215	other organism	cellular_component	1	ENSRNOG00000000457,
2	GO:0043226	organelle	cellular_component	185	ENSRNOG00000032929,ENSRNOG00000020751,ENSRNOG00000028946,ENSRNOG00000017181,ENSRNOG00000025757,ENSRNOG00000010855,ENSRNOG00000020482,ENSRNOG00000004300,ENSRNOG00000010649,ENSRNOG00000003622,ENSRNOG00000005256,ENSRNOG00000013557,ENSRNOG00000024194,ENSRNOG00000015787,ENSRNOG00000007408,ENSRNOG00000029115,ENSRNOG00000008022,ENSRNOG00000038720,ENSRNOG00000027787,ENSRNOG00000001453,ENSRNOG00000012965,…
2	GO:0005623	cell	cellular_component	231	ENSRNOG00000025406,ENSRNOG00000009826,ENSRNOG00000048606,ENSRNOG00000016133,ENSRNOG00000016632,ENSRNOG00000007102,ENSRNOG00000013166,ENSRNOG00000017975,ENSRNOG00000020444,ENSRNOG00000059765,ENSRNOG00000005491,ENSRNOG00000005957,ENSRNOG00000057221,ENSRNOG00000033101,ENSRNOG00000045524,ENSRNOG00000011663,ENSRNOG00000053230,ENSRNOG00000024450,ENSRNOG00000025408,ENSRNOG00000019727,ENSRNOG00000018574,…
2	GO:0051704	multi-organism process	biological_process	20	ENSRNOG00000013166,ENSRNOG00000024194,ENSRNOG00000000457,ENSRNOG00000018901,ENSRNOG00000039859,ENSRNOG00000006965,ENSRNOG00000001187,ENSRNOG00000002215,ENSRNOG00000012358,ENSRNOG00000000934,ENSRNOG00000009571,ENSRNOG00000004276,ENSRNOG00000014584,ENSRNOG00000060320,ENSRNOG00000015734,ENSRNOG00000017181,ENSRNOG00000009348,ENSRNOG00000019978,ENSRNOG00000049115,ENSRNOG00000000841,
2	GO:0099531	presynaptic process involved in chemical synaptic transmission	biological_process	5	ENSRNOG00000013171,ENSRNOG00000019318,ENSRNOG00000001285,ENSRNOG00000018009,ENSRNOG00000059765,
2	GO:0099080	supramolecular complex	cellular_component	11	ENSRNOG00000009571,ENSRNOG00000006082,ENSRNOG00000025406,ENSRNOG00000014584,ENSRNOG00000000417,ENSRNOG00000049695,ENSRNOG00000014409,ENSRNOG00000057221,ENSRNOG00000046276,ENSRNOG00000025757,ENSRNOG00000016983,
2	GO:0040007	growth	biological_process	12	ENSRNOG00000047080,ENSRNOG00000003261,ENSRNOG00000005616,ENSRNOG00000019318,ENSRNOG00000015734,ENSRNOG00000025757,ENSRNOG00000027592,ENSRNOG00000049115,ENSRNOG00000009184,ENSRNOG00000008065,ENSRNOG00000000841,ENSRNOG00000011321,
2	GO:0023052	signaling	biological_process	69	ENSRNOG00000031162,ENSRNOG00000008065,ENSRNOG00000000633,ENSRNOG00000011820,ENSRNOG00000015734,ENSRNOG00000025423,ENSRNOG00000008619,ENSRNOG00000000956,ENSRNOG00000004276,ENSRNOG00000011975,ENSRNOG00000002549,ENSRNOG00000008865,ENSRNOG00000011321,ENSRNOG00000020377,ENSRNOG00000013610,ENSRNOG00000052061,ENSRNOG00000031544,ENSRNOG00000002593,ENSRNOG00000018144,ENSRNOG00000021200,ENSRNOG00000019208,…
2	GO:0044699	single-organism process	biological_process	178	ENSRNOG00000011975,ENSRNOG00000032224,ENSRNOG00000024266,ENSRNOG00000002215,ENSRNOG00000017383,ENSRNOG00000056011,ENSRNOG00000024178,ENSRNOG00000005234,ENSRNOG00000031162,ENSRNOG00000038999,ENSRNOG00000000633,ENSRNOG00000012264,ENSRNOG00000008619,ENSRNOG00000000308,ENSRNOG00000007023,ENSRNOG00000025423,ENSRNOG00000009571,ENSRNOG00000027592,ENSRNOG00000019220,ENSRNOG00000016983,ENSRNOG00000020658,…
2	GO:0060089	molecular transducer activity	molecular_function	13	ENSRNOG00000019208,ENSRNOG00000003298,ENSRNOG00000021200,ENSRNOG00000002593,ENSRNOG00000013171,ENSRNOG00000008619,ENSRNOG00000002549,ENSRNOG00000013610,ENSRNOG00000002011,ENSRNOG00000048932,ENSRNOG00000059765,ENSRNOG00000049115,ENSRNOG00000002265,
2	GO:0051179	localization	biological_process	76	ENSRNOG00000036745,ENSRNOG00000051711,ENSRNOG00000015602,ENSRNOG00000049115,ENSRNOG00000014628,ENSRNOG00000001189,ENSRNOG00000000417,ENSRNOG00000019727,ENSRNOG00000005491,ENSRNOG00000005957,ENSRNOG00000057221,ENSRNOG00000045524,ENSRNOG00000033101,ENSRNOG00000020444,ENSRNOG00000016655,ENSRNOG00000015741,ENSRNOG00000059765,ENSRNOG00000021555,ENSRNOG00000016133,ENSRNOG00000013166,ENSRNOG00000009783,…
2	GO:0045202	synapse	cellular_component	19	ENSRNOG00000001285,ENSRNOG00000019318,ENSRNOG00000005957,ENSRNOG00000016448,ENSRNOG00000019629,ENSRNOG00000020444,ENSRNOG00000002265,ENSRNOG00000014083,ENSRNOG00000016133,ENSRNOG00000013171,ENSRNOG00000010649,ENSRNOG00000009783,ENSRNOG00000018009,ENSRNOG00000011071,ENSRNOG00000013610,ENSRNOG00000014409,ENSRNOG00000015602,ENSRNOG00000004276,ENSRNOG00000026466,
2	GO:0007610	behavior	biological_process	11	ENSRNOG00000013610,ENSRNOG00000002265,ENSRNOG00000049115,ENSRNOG00000012436,ENSRNOG00000059765,ENSRNOG00000014628,ENSRNOG00000004730,ENSRNOG00000004276,ENSRNOG00000010649,ENSRNOG00000009826,ENSRNOG00000006639,
2	GO:0048511	rhythmic process	biological_process	5	ENSRNOG00000015734,ENSRNOG00000009348,ENSRNOG00000031916,ENSRNOG00000001189,ENSRNOG00000012358,
2	GO:0008152	metabolic process	biological_process	169	ENSRNOG00000001719,ENSRNOG00000002827,ENSRNOG00000006462,ENSRNOG00000025111,ENSRNOG00000012037,ENSRNOG00000024128,ENSRNOG00000000934,ENSRNOG00000019629,ENSRNOG00000012358,ENSRNOG00000054385,ENSRNOG00000019817,ENSRNOG00000039859,ENSRNOG00000001285,ENSRNOG00000017157,ENSRNOG00000036699,ENSRNOG00000011859,ENSRNOG00000018326,ENSRNOG00000000394,ENSRNOG00000000230,ENSRNOG00000021213,ENSRNOG00000015150,…
2	GO:0005198	structural molecule activity	molecular_function	5	ENSRNOG00000008065,ENSRNOG00000029115,ENSRNOG00000012818,ENSRNOG00000019165,ENSRNOG00000018700,
