# Supplementary material for: LncRNAs down-regulate Myh1, Casr, and Mis18a expression in the Substantia Nigra of aged male rats
Source: Aging (Albany NY). 2019 Oct 2;11(19):8313–28. doi: 10.18632/aging.102321 (PMC6814601; doi:10.18632/aging.102321)
Supplement: Supplementary Table 12 [file aging-11-102321-s018.xlsx]

## Sheet: Table 12
GO_ID	GO_term	TYPE	target_gene_in_this_GO	all_target_gene_in_all_GO	all_gene_in_this_GO	all_gene_in_all_GO	gene_list	rich_factor	Pvalue	Qvalue
GO:0004683	calmodulin-dependent protein kinase activity	molecular_function	4	301	28	19765	ENSRNOG00000003063(Phka1),ENSRNOG00000002215(Mylk),ENSRNOG00000016448(Eef2k),ENSRNOG00000009783(Camk2g),	9.38064	0.000253936	0.0870492
GO:0005272	sodium channel activity	molecular_function	4	301	29	19765	ENSRNOG00000020444(Hcn3),ENSRNOG00000059765(Asic1),ENSRNOG00000057221(Scn3b),ENSRNOG00000006639(Scn9a),	9.05717	0.000294035	0.0775349
GO:0042269	regulation of natural killer cell mediated cytotoxicity	biological_process	4	301	30	19765	ENSRNOG00000000457(Tap1),ENSRNOG00000038999(RT1-A1),ENSRNOG00000048932(Smagp),ENSRNOG00000019629(Lamp1),	8.75526	0.0003388	0.0829575
GO:0042641	actomyosin	cellular_component	6	301	60	19765	ENSRNOG00000025757(Myh6),ENSRNOG00000033101(Myo18a),ENSRNOG00000002215(Mylk),ENSRNOG00000004345(Daam1),ENSRNOG00000059801(Lima1),ENSRNOG00000016983(Myh7),	6.56645	0.000135234	0.154528
GO:0001725	stress fiber	cellular_component	5	301	51	19765	ENSRNOG00000016983(Myh7),ENSRNOG00000025757(Myh6),ENSRNOG00000002215(Mylk),ENSRNOG00000004345(Daam1),ENSRNOG00000059801(Lima1),	6.43769	0.000429375	0.0981266
GO:0042267	natural killer cell mediated cytotoxicity	biological_process	4	301	42	19765	ENSRNOG00000000457(Tap1),ENSRNOG00000048932(Smagp),ENSRNOG00000019629(Lamp1),ENSRNOG00000038999(RT1-A1),	6.25376	0.00137939	0.236428
GO:0002228	natural killer cell mediated immunity	biological_process	4	301	43	19765	ENSRNOG00000019629(Lamp1),ENSRNOG00000038999(RT1-A1),ENSRNOG00000048932(Smagp),ENSRNOG00000000457(Tap1),	6.10832	0.00152085	0.24826
GO:0003725	double-stranded RNA binding	molecular_function	5	301	55	19765	ENSRNOG00000001187(Oasl),ENSRNOG00000001426(Prkrip1),ENSRNOG00000011321(Rftn1),ENSRNOG00000028814(Oasl2),ENSRNOG00000030118(Msn),	5.9695	0.000624345	0.133766
GO:0030048	actin filament-based movement	biological_process	6	301	67	19765	ENSRNOG00000016133(Sumo1),ENSRNOG00000057221(Scn3b),ENSRNOG00000016983(Myh7),ENSRNOG00000009571(Wipf3),ENSRNOG00000025757(Myh6),ENSRNOG00000001285(Atp2a2),	5.8804	0.000255462	0.0796111
GO:0032432	actin filament bundle	cellular_component	5	301	56	19765	ENSRNOG00000016983(Myh7),ENSRNOG00000004345(Daam1),ENSRNOG00000059801(Lima1),ENSRNOG00000002215(Mylk),ENSRNOG00000025757(Myh6),	5.8629	0.000682493	0.137623
GO:0045335	phagocytic vesicle	cellular_component	4	301	47	19765	ENSRNOG00000018009(Rab8b),ENSRNOG00000058940(Rab11fip1),ENSRNOG00000018901(Rab14),ENSRNOG00000019629(Lamp1),	5.58846	0.00219698	0.30125
GO:0016459	myosin complex	cellular_component	4	301	51	19765	ENSRNOG00000025757(Myh6),ENSRNOG00000033101(Myo18a),ENSRNOG00000016983(Myh7),ENSRNOG00000049695(Myh1),	5.15015	0.00307345	0.376278
GO:0070252	actin-mediated cell contraction	biological_process	4	301	53	19765	ENSRNOG00000001285(Atp2a2),ENSRNOG00000016133(Sumo1),ENSRNOG00000057221(Scn3b),ENSRNOG00000016983(Myh7),	4.95581	0.00359701	0.411018
GO:0050852	T cell receptor signaling pathway	biological_process	4	301	57	19765	ENSRNOG00000011321(Rftn1),ENSRNOG00000017181(Malt1),ENSRNOG00000012965(Themis2),ENSRNOG00000003298(Cd247),	4.60803	0.00483569	0.44802
GO:0006414	translational elongation	biological_process	4	301	57	19765	ENSRNOG00000001161(Gatc),ENSRNOG00000001073(RGD1563482),ENSRNOG00000020658(Aarsd1),ENSRNOG00000011859(Eif5a2),	4.60803	0.00483569	0.44802
GO:0001906	cell killing	biological_process	5	301	84	19765	ENSRNOG00000038999(RT1-A1),ENSRNOG00000019629(Lamp1),ENSRNOG00000049115(Ccr5),ENSRNOG00000000457(Tap1),ENSRNOG00000048932(Smagp),	3.9086	0.00484738	0.426072
GO:0051015	actin filament binding	molecular_function	6	301	101	19765	ENSRNOG00000059801(Lima1),ENSRNOG00000009571(Wipf3),ENSRNOG00000028856(Pknox2),ENSRNOG00000025406(Iqgap2),ENSRNOG00000046276(Myh3),ENSRNOG00000033101(Myo18a),	3.90086	0.00254811	0.323515
GO:0000792	heterochromatin	cellular_component	4	301	68	19765	ENSRNOG00000039859(Dnmt1),ENSRNOG00000016133(Sumo1),ENSRNOG00000001453(Baz1b),ENSRNOG00000032929(Incenp),	3.86261	0.00980703	0.634311
GO:0006304	DNA modification	biological_process	4	301	70	19765	ENSRNOG00000012264(Alkbh1),ENSRNOG00000039859(Dnmt1),ENSRNOG00000021555(Mis18a),ENSRNOG00000021614(Kmt2e),	3.75225	0.0109965	0.685381
GO:0001909	leukocyte mediated cytotoxicity	biological_process	4	301	70	19765	ENSRNOG00000038999(RT1-A1),ENSRNOG00000019629(Lamp1),ENSRNOG00000000457(Tap1),ENSRNOG00000048932(Smagp),	3.75225	0.0109965	0.685381
GO:0045454	cell redox homeostasis	biological_process	4	301	70	19765	ENSRNOG00000057934(Tmx1),ENSRNOG00000006462(Ero1l),ENSRNOG00000051408(Magt1),ENSRNOG00000018574(Qsox2),	3.75225	0.0109965	0.685381
GO:0045727	positive regulation of translation	biological_process	4	301	72	19765	ENSRNOG00000000841(Ddx39b),ENSRNOG00000011859(Eif5a2),ENSRNOG00000031544(Larp1),ENSRNOG00000060320(Lin28a),	3.64803	0.0122842	0.679198
GO:0006941	striated muscle contraction	biological_process	7	301	126	19765	ENSRNOG00000025757(Myh6),ENSRNOG00000001285(Atp2a2),ENSRNOG00000049695(Myh1),ENSRNOG00000057221(Scn3b),ENSRNOG00000016983(Myh7),ENSRNOG00000046276(Myh3),ENSRNOG00000016133(Sumo1),	3.64803	0.00200775	0.299241
GO:0060048	cardiac muscle contraction	biological_process	5	301	91	19765	ENSRNOG00000016133(Sumo1),ENSRNOG00000016983(Myh7),ENSRNOG00000057221(Scn3b),ENSRNOG00000025757(Myh6),ENSRNOG00000001285(Atp2a2),	3.60794	0.00704396	0.536594
GO:0030838	positive regulation of actin filament polymerization	biological_process	4	301	75	19765	ENSRNOG00000031162(Ccl24),ENSRNOG00000025406(Iqgap2),ENSRNOG00000028946(Cdc42ep4),ENSRNOG00000009571(Wipf3),	3.5021	0.0144089	0.759903
GO:0030175	filopodium	cellular_component	4	301	75	19765	ENSRNOG00000004276(Itga3),ENSRNOG00000011820(Acpp),ENSRNOG00000025406(Iqgap2),ENSRNOG00000030118(Msn),	3.5021	0.0144089	0.759903
GO:0019882	antigen processing and presentation	biological_process	5	301	96	19765	ENSRNOG00000038999(RT1-A1),ENSRNOG00000026762(RT1-DOa),ENSRNOG00000018009(Rab8b),ENSRNOG00000000457(Tap1),ENSRNOG00000011321(Rftn1),	3.42002	0.00901372	0.594212
GO:0046620	regulation of organ growth	biological_process	4	301	77	19765	ENSRNOG00000025757(Myh6),ENSRNOG00000008065(Wwc1),ENSRNOG00000000841(Ddx39b),ENSRNOG00000009184(Foxp1),	3.41114	0.0159599	0.770569
GO:0006641	triglyceride metabolic process	biological_process	4	301	78	19765	ENSRNOG00000027434(Fitm2),ENSRNOG00000001189(Sik1),ENSRNOG00000022268(Pnpla3),ENSRNOG00000000230(Lmf1),	3.36741	0.0167771	0.787836
GO:0000922	spindle pole	cellular_component	5	301	101	19765	ENSRNOG00000014584(Odf2),ENSRNOG00000024450(Poc1b),ENSRNOG00000006082(Rmdn2),ENSRNOG00000000417(Numa1),ENSRNOG00000027787(Cdc6),	3.25072	0.0113617	0.671517
GO:0005516	calmodulin binding	molecular_function	5	301	102	19765	ENSRNOG00000003063(Phka1),ENSRNOG00000025406(Iqgap2),ENSRNOG00000009783(Camk2g),ENSRNOG00000016448(Eef2k),ENSRNOG00000009348(Nos3),	3.21885	0.0118802	0.678754
GO:0031072	heat shock protein binding	molecular_function	4	301	83	19765	ENSRNOG00000017383(l7Rn6),ENSRNOG00000008022(Apaf1),ENSRNOG00000010967(Cdc37l1),ENSRNOG00000052061(Ppef2),	3.16455	0.0213003	0.924271
GO:0030139	endocytic vesicle	cellular_component	5	301	105	19765	ENSRNOG00000058940(Rab11fip1),ENSRNOG00000007744(Ehd3),ENSRNOG00000019629(Lamp1),ENSRNOG00000018009(Rab8b),ENSRNOG00000018901(Rab14),	3.12688	0.0135388	0.736685
GO:0007030	Golgi organization	biological_process	4	301	85	19765	ENSRNOG00000033101(Myo18a),ENSRNOG00000047620(Golph3l),ENSRNOG00000017383(l7Rn6),ENSRNOG00000006523(Atl2),	3.09009	0.0233218	0.951752
GO:0008360	regulation of cell shape	biological_process	5	301	109	19765	ENSRNOG00000036745(Gna13),ENSRNOG00000031162(Ccl24),ENSRNOG00000009571(Wipf3),ENSRNOG00000028946(Cdc42ep4),ENSRNOG00000030118(Msn),	3.01213	0.0160031	0.761925
GO:0006639	acylglycerol metabolic process	biological_process	4	301	88	19765	ENSRNOG00000000230(Lmf1),ENSRNOG00000022268(Pnpla3),ENSRNOG00000001189(Sik1),ENSRNOG00000027434(Fitm2),	2.98475	0.0265923	1
GO:0050821	protein stabilization	biological_process	4	301	89	19765	ENSRNOG00000010967(Cdc37l1),ENSRNOG00000019629(Lamp1),ENSRNOG00000016133(Sumo1),ENSRNOG00000016655(Pex6),	2.95121	0.0277476	1
GO:0032273	positive regulation of protein polymerization	biological_process	4	301	89	19765	ENSRNOG00000031162(Ccl24),ENSRNOG00000025406(Iqgap2),ENSRNOG00000028946(Cdc42ep4),ENSRNOG00000009571(Wipf3),	2.95121	0.0277476	1
GO:0035725	sodium ion transmembrane transport	biological_process	5	301	112	19765	ENSRNOG00000057221(Scn3b),ENSRNOG00000005957(Slc4a7),ENSRNOG00000059765(Asic1),ENSRNOG00000020444(Hcn3),ENSRNOG00000006639(Scn9a),	2.93145	0.0180515	0.825075
GO:0031514	motile cilium	cellular_component	4	301	90	19765	ENSRNOG00000014584(Odf2),ENSRNOG00000017975(Dnajb13),ENSRNOG00000053230(Fopnl),ENSRNOG00000060693(AC118147.2),	2.91842	0.0289362	1
GO:0006638	neutral lipid metabolic process	biological_process	4	301	90	19765	ENSRNOG00000027434(Fitm2),ENSRNOG00000001189(Sik1),ENSRNOG00000022268(Pnpla3),ENSRNOG00000000230(Lmf1),	2.91842	0.0289362	1
GO:0031334	positive regulation of protein complex assembly	biological_process	7	301	159	19765	ENSRNOG00000016133(Sumo1),ENSRNOG00000031162(Ccl24),ENSRNOG00000025406(Iqgap2),ENSRNOG00000028946(Cdc42ep4),ENSRNOG00000007203(Psmc6),ENSRNOG00000030118(Msn),ENSRNOG00000009571(Wipf3),	2.89089	0.00792894	0.578307
GO:0015081	sodium ion transmembrane transporter activity	molecular_function	5	301	116	19765	ENSRNOG00000005957(Slc4a7),ENSRNOG00000057221(Scn3b),ENSRNOG00000020444(Hcn3),ENSRNOG00000059765(Asic1),ENSRNOG00000006639(Scn9a),	2.83036	0.0210653	0.925791
GO:0001948	glycoprotein binding	molecular_function	4	301	93	19765	ENSRNOG00000005749(Foxred2),ENSRNOG00000018901(Rab14),ENSRNOG00000004276(Itga3),ENSRNOG00000021200(Hfe2),	2.82428	0.0327052	1
GO:0055007	cardiac muscle cell differentiation	biological_process	4	301	94	19765	ENSRNOG00000000841(Ddx39b),ENSRNOG00000009184(Foxp1),ENSRNOG00000001189(Sik1),ENSRNOG00000025757(Myh6),	2.79423	0.0340306	1
GO:0008016	regulation of heart contraction	biological_process	6	301	141	19765	ENSRNOG00000057221(Scn3b),ENSRNOG00000016133(Sumo1),ENSRNOG00000025757(Myh6),ENSRNOG00000001285(Atp2a2),ENSRNOG00000016983(Myh7),ENSRNOG00000009348(Nos3),	2.79423	0.0146209	0.748064
GO:0007269	neurotransmitter secretion	biological_process	5	301	118	19765	ENSRNOG00000019318(Syt3),ENSRNOG00000059765(Asic1),ENSRNOG00000013171(Grm2),ENSRNOG00000001285(Atp2a2),ENSRNOG00000018009(Rab8b),	2.78239	0.0226985	0.937475
GO:0006814	sodium ion transport	biological_process	7	301	166	19765	ENSRNOG00000001189(Sik1),ENSRNOG00000057221(Scn3b),ENSRNOG00000005957(Slc4a7),ENSRNOG00000059765(Asic1),ENSRNOG00000009348(Nos3),ENSRNOG00000020444(Hcn3),ENSRNOG00000006639(Scn9a),	2.76898	0.0101259	0.642805
GO:0001508	action potential	biological_process	4	301	95	19765	ENSRNOG00000001285(Atp2a2),ENSRNOG00000057221(Scn3b),ENSRNOG00000016133(Sumo1),ENSRNOG00000006639(Scn9a),	2.76482	0.035391	1
GO:0052689	carboxylic ester hydrolase activity	molecular_function	5	301	119	19765	ENSRNOG00000022268(Pnpla3),ENSRNOG00000001073(RGD1563482),ENSRNOG00000009826(Bche),ENSRNOG00000018326(Pgls),ENSRNOG00000020658(Aarsd1),	2.75901	0.0235477	0.949665
GO:0055001	muscle cell development	biological_process	6	301	143	19765	ENSRNOG00000000841(Ddx39b),ENSRNOG00000020482(Nfatc4),ENSRNOG00000009184(Foxp1),ENSRNOG00000013674(Megf10),ENSRNOG00000001285(Atp2a2),ENSRNOG00000025757(Myh6),	2.75515	0.0156876	0.779378
GO:0044325	ion channel binding	molecular_function	4	301	97	19765	ENSRNOG00000002265(Casr),ENSRNOG00000016133(Sumo1),ENSRNOG00000015746(Kcng4),ENSRNOG00000057221(Scn3b),	2.70781	0.0382184	1
GO:0003779	actin binding	molecular_function	12	301	300	19765	ENSRNOG00000016983(Myh7),ENSRNOG00000025757(Myh6),ENSRNOG00000049695(Myh1),ENSRNOG00000025406(Iqgap2),ENSRNOG00000028856(Pknox2),ENSRNOG00000059801(Lima1),ENSRNOG00000046276(Myh3),ENSRNOG00000004345(Daam1),ENSRNOG00000030118(Msn),ENSRNOG00000009571(Wipf3),ENSRNOG00000009348(Nos3),ENSRNOG00000033101(Myo18a),	2.62658	0.0021119	0.301649
GO:0050851	antigen receptor-mediated signaling pathway	biological_process	4	301	100	19765	ENSRNOG00000011321(Rftn1),ENSRNOG00000003298(Cd247),ENSRNOG00000017181(Malt1),ENSRNOG00000012965(Themis2),	2.62658	0.042731	1
GO:0042623	ATPase activity, coupled	molecular_function	11	301	283	19765	ENSRNOG00000000841(Ddx39b),ENSRNOG00000007203(Psmc6),ENSRNOG00000000457(Tap1),ENSRNOG00000001285(Atp2a2),ENSRNOG00000016655(Pex6),ENSRNOG00000023312(Lonrf2),ENSRNOG00000001134(Rfc5),ENSRNOG00000046276(Myh3),ENSRNOG00000016983(Myh7),ENSRNOG00000019817(Ddx28),ENSRNOG00000025757(Myh6),	2.55233	0.00383542	0.41087
GO:0050807	regulation of synapse organization	biological_process	4	301	103	19765	ENSRNOG00000026466(Lrrtm3),ENSRNOG00000016448(Eef2k),ENSRNOG00000020482(Nfatc4),ENSRNOG00000015602(Cdh2),	2.55008	0.0475764	1
GO:0048284	organelle fusion	biological_process	4	301	104	19765	ENSRNOG00000019318(Syt3),ENSRNOG00000003971(Gosr1),ENSRNOG00000018009(Rab8b),ENSRNOG00000021213(Lix1l),	2.52556	0.0492668	1
GO:0006333	chromatin assembly or disassembly	biological_process	4	301	105	19765	ENSRNOG00000024194(Rsf1),ENSRNOG00000032224(Hist1h4b),ENSRNOG00000001453(Baz1b),ENSRNOG00000021555(Mis18a),	2.5015	0.0509953	1
GO:0000775	chromosome, centromeric region	cellular_component	5	301	135	19765	ENSRNOG00000001453(Baz1b),ENSRNOG00000024178(Cenpt),ENSRNOG00000039859(Dnmt1),ENSRNOG00000032929(Incenp),ENSRNOG00000021555(Mis18a),	2.43202	0.0403259	1
GO:0001505	regulation of neurotransmitter levels	biological_process	6	301	162	19765	ENSRNOG00000009826(Bche),ENSRNOG00000059765(Asic1),ENSRNOG00000013171(Grm2),ENSRNOG00000001285(Atp2a2),ENSRNOG00000018009(Rab8b),ENSRNOG00000019318(Syt3),	2.43202	0.0288624	1
GO:0048754	branching morphogenesis of an epithelial tube	biological_process	6	301	163	19765	ENSRNOG00000005616(Ncoa3),ENSRNOG00000020482(Nfatc4),ENSRNOG00000036745(Gna13),ENSRNOG00000002265(Casr),ENSRNOG00000013166(Wnt4),ENSRNOG00000031916(Timeless),	2.4171	0.0297231	1
GO:0015629	actin cytoskeleton	cellular_component	14	301	381	19765	ENSRNOG00000009571(Wipf3),ENSRNOG00000026748(Dennd2a),ENSRNOG00000015602(Cdh2),ENSRNOG00000033101(Myo18a),ENSRNOG00000007504(Actr10),ENSRNOG00000016983(Myh7),ENSRNOG00000025757(Myh6),ENSRNOG00000049695(Myh1),ENSRNOG00000025406(Iqgap2),ENSRNOG00000028856(Pknox2),ENSRNOG00000028946(Cdc42ep4),ENSRNOG00000059801(Lima1),ENSRNOG00000004345(Daam1),ENSRNOG00000002215(Mylk),	2.41287	0.00230285	0.303622
GO:0003012	muscle system process	biological_process	11	301	301	19765	ENSRNOG00000009783(Camk2g),ENSRNOG00000009348(Nos3),ENSRNOG00000001285(Atp2a2),ENSRNOG00000057221(Scn3b),ENSRNOG00000000841(Ddx39b),ENSRNOG00000016983(Myh7),ENSRNOG00000025757(Myh6),ENSRNOG00000046276(Myh3),ENSRNOG00000002215(Mylk),ENSRNOG00000016133(Sumo1),ENSRNOG00000049695(Myh1),	2.3997	0.00620463	0.483397
GO:0045766	positive regulation of angiogenesis	biological_process	4	301	110	19765	ENSRNOG00000049115(Ccr5),ENSRNOG00000031162(Ccl24),ENSRNOG00000004158(Hdac9),ENSRNOG00000009348(Nos3),	2.3878	0.0602172	1
GO:0008585	female gonad development	biological_process	4	301	110	19765	ENSRNOG00000015734(Ube3a),ENSRNOG00000012358(Pcyt1b),ENSRNOG00000009348(Nos3),ENSRNOG00000013166(Wnt4),	2.3878	0.0602172	1
GO:0035265	organ growth	biological_process	5	301	138	19765	ENSRNOG00000025757(Myh6),ENSRNOG00000009184(Foxp1),ENSRNOG00000000841(Ddx39b),ENSRNOG00000008065(Wwc1),ENSRNOG00000015734(Ube3a),	2.37915	0.0441886	1
GO:0090257	regulation of muscle system process	biological_process	6	301	166	19765	ENSRNOG00000009783(Camk2g),ENSRNOG00000009348(Nos3),ENSRNOG00000016983(Myh7),ENSRNOG00000001285(Atp2a2),ENSRNOG00000016133(Sumo1),ENSRNOG00000000841(Ddx39b),	2.37341	0.0324146	1
GO:0016607	nuclear speck	cellular_component	4	301	112	19765	ENSRNOG00000016133(Sumo1),ENSRNOG00000017157(Trim69),ENSRNOG00000058561(Srrm2),ENSRNOG00000000841(Ddx39b),	2.34516	0.0641802	1
GO:0005525	GTP binding	molecular_function	13	301	364	19765	ENSRNOG00000000633(Rhobtb1),ENSRNOG00000007744(Ehd3),ENSRNOG00000018901(Rab14),ENSRNOG00000018009(Rab8b),ENSRNOG00000002509(Gnl3l),ENSRNOG00000036745(Gna13),ENSRNOG00000006523(Atl2),ENSRNOG00000013110(Nudt2),ENSRNOG00000000956(Rasl11a),ENSRNOG00000027592(Rerg),ENSRNOG00000052506(Ak3),ENSRNOG00000054385(Rhebl1),ENSRNOG00000018714(Arl5b),	2.34516	0.00405474	0.408813
GO:0090002	establishment of protein localization to plasma membrane	biological_process	4	301	113	19765	ENSRNOG00000007744(Ehd3),ENSRNOG00000004276(Itga3),ENSRNOG00000013166(Wnt4),ENSRNOG00000015602(Cdh2),	2.32441	0.0662213	1
GO:0035051	cardiocyte differentiation	biological_process	4	301	113	19765	ENSRNOG00000025757(Myh6),ENSRNOG00000001189(Sik1),ENSRNOG00000009184(Foxp1),ENSRNOG00000000841(Ddx39b),	2.32441	0.0662213	1
GO:0019233	sensory perception of pain	biological_process	4	301	113	19765	ENSRNOG00000057221(Scn3b),ENSRNOG00000014628(Pomk),ENSRNOG00000011820(Acpp),ENSRNOG00000059765(Asic1),	2.32441	0.0662213	1
GO:0017016	Ras GTPase binding	molecular_function	7	301	198	19765	ENSRNOG00000028946(Cdc42ep4),ENSRNOG00000025406(Iqgap2),ENSRNOG00000003457(Ccdc64b),ENSRNOG00000032703(Rasgrp3),ENSRNOG00000004345(Daam1),ENSRNOG00000058940(Rab11fip1),ENSRNOG00000014584(Odf2),	2.32147	0.0265232	1
GO:0030832	regulation of actin filament length	biological_process	5	301	142	19765	ENSRNOG00000025406(Iqgap2),ENSRNOG00000028946(Cdc42ep4),ENSRNOG00000059801(Lima1),ENSRNOG00000031162(Ccl24),ENSRNOG00000009571(Wipf3),	2.31213	0.0497157	1
GO:0008064	regulation of actin polymerization or depolymerization	biological_process	5	301	142	19765	ENSRNOG00000031162(Ccl24),ENSRNOG00000028946(Cdc42ep4),ENSRNOG00000059801(Lima1),ENSRNOG00000025406(Iqgap2),ENSRNOG00000009571(Wipf3),	2.31213	0.0497157	1
GO:0003774	motor activity	molecular_function	4	301	114	19765	ENSRNOG00000025757(Myh6),ENSRNOG00000016983(Myh7),ENSRNOG00000049695(Myh1),ENSRNOG00000033101(Myo18a),	2.30402	0.0683024	1
GO:0043292	contractile fiber	cellular_component	6	301	171	19765	ENSRNOG00000025757(Myh6),ENSRNOG00000014409(Myl7),ENSRNOG00000016983(Myh7),ENSRNOG00000046276(Myh3),ENSRNOG00000049695(Myh1),ENSRNOG00000057221(Scn3b),	2.30402	0.0372762	1
GO:0060047	heart contraction	biological_process	6	301	171	19765	ENSRNOG00000016983(Myh7),ENSRNOG00000001285(Atp2a2),ENSRNOG00000025757(Myh6),ENSRNOG00000009348(Nos3),ENSRNOG00000057221(Scn3b),ENSRNOG00000016133(Sumo1),	2.30402	0.0372762	1
GO:0046890	regulation of lipid biosynthetic process	biological_process	4	301	115	19765	ENSRNOG00000011071(Nt5e),ENSRNOG00000027434(Fitm2),ENSRNOG00000013166(Wnt4),ENSRNOG00000001189(Sik1),	2.28398	0.0704235	1
GO:0046545	development of primary female sexual characteristics	biological_process	4	301	115	19765	ENSRNOG00000009348(Nos3),ENSRNOG00000012358(Pcyt1b),ENSRNOG00000015734(Ube3a),ENSRNOG00000013166(Wnt4),	2.28398	0.0704235	1
GO:0003729	mRNA binding	molecular_function	5	301	144	19765	ENSRNOG00000000934(Piwil1),ENSRNOG00000060320(Lin28a),ENSRNOG00000052968(Hnrnpa3),ENSRNOG00000031544(Larp1),ENSRNOG00000002827(Rbfox1),	2.28002	0.0526444	1
GO:0006936	muscle contraction	biological_process	8	301	231	19765	ENSRNOG00000046276(Myh3),ENSRNOG00000002215(Mylk),ENSRNOG00000016133(Sumo1),ENSRNOG00000049695(Myh1),ENSRNOG00000057221(Scn3b),ENSRNOG00000001285(Atp2a2),ENSRNOG00000025757(Myh6),ENSRNOG00000016983(Myh7),	2.27409	0.0220934	0.935014
GO:0044089	positive regulation of cellular component biogenesis	biological_process	12	301	348	19765	ENSRNOG00000016448(Eef2k),ENSRNOG00000030118(Msn),ENSRNOG00000009571(Wipf3),ENSRNOG00000007203(Psmc6),ENSRNOG00000013166(Wnt4),ENSRNOG00000010999(Cep295),ENSRNOG00000031162(Ccl24),ENSRNOG00000015602(Cdh2),ENSRNOG00000026466(Lrrtm3),ENSRNOG00000016133(Sumo1),ENSRNOG00000025406(Iqgap2),ENSRNOG00000028946(Cdc42ep4),	2.26429	0.00727343	0.542028
GO:0032561	guanyl ribonucleotide binding	molecular_function	13	301	378	19765	ENSRNOG00000054385(Rhebl1),ENSRNOG00000018714(Arl5b),ENSRNOG00000052506(Ak3),ENSRNOG00000027592(Rerg),ENSRNOG00000000956(Rasl11a),ENSRNOG00000006523(Atl2),ENSRNOG00000013110(Nudt2),ENSRNOG00000036745(Gna13),ENSRNOG00000018009(Rab8b),ENSRNOG00000002509(Gnl3l),ENSRNOG00000018901(Rab14),ENSRNOG00000000633(Rhobtb1),ENSRNOG00000007744(Ehd3),	2.2583	0.00562293	0.481885
GO:0019001	guanyl nucleotide binding	molecular_function	13	301	379	19765	ENSRNOG00000036745(Gna13),ENSRNOG00000018901(Rab14),ENSRNOG00000002509(Gnl3l),ENSRNOG00000018009(Rab8b),ENSRNOG00000000633(Rhobtb1),ENSRNOG00000007744(Ehd3),ENSRNOG00000052506(Ak3),ENSRNOG00000018714(Arl5b),ENSRNOG00000054385(Rhebl1),ENSRNOG00000027592(Rerg),ENSRNOG00000000956(Rasl11a),ENSRNOG00000013110(Nudt2),ENSRNOG00000006523(Atl2),	2.25234	0.00575171	0.469449
GO:0005777	peroxisome	cellular_component	4	301	118	19765	ENSRNOG00000003980(Ttc1),ENSRNOG00000018009(Rab8b),ENSRNOG00000019630(Hacl1),ENSRNOG00000016655(Pex6),	2.22591	0.0770286	1
GO:0072659	protein localization to plasma membrane	biological_process	6	301	177	19765	ENSRNOG00000057221(Scn3b),ENSRNOG00000015602(Cdh2),ENSRNOG00000004276(Itga3),ENSRNOG00000007744(Ehd3),ENSRNOG00000018009(Rab8b),ENSRNOG00000013166(Wnt4),	2.22591	0.0437576	1
GO:0030509	BMP signaling pathway	biological_process	4	301	118	19765	ENSRNOG00000025757(Myh6),ENSRNOG00000004276(Itga3),ENSRNOG00000003261(Usp9x),ENSRNOG00000021200(Hfe2),	2.22591	0.0770286	1
GO:0071248	cellular response to metal ion	biological_process	4	301	118	19765	ENSRNOG00000019830(Hsd17b1),ENSRNOG00000039859(Dnmt1),ENSRNOG00000020482(Nfatc4),ENSRNOG00000016448(Eef2k),	2.22591	0.0770286	1
GO:0031267	small GTPase binding	molecular_function	7	301	208	19765	ENSRNOG00000014584(Odf2),ENSRNOG00000058940(Rab11fip1),ENSRNOG00000032703(Rasgrp3),ENSRNOG00000003457(Ccdc64b),ENSRNOG00000025406(Iqgap2),ENSRNOG00000028946(Cdc42ep4),ENSRNOG00000004345(Daam1),	2.20986	0.0343033	1
GO:0035770	ribonucleoprotein granule	cellular_component	4	301	119	19765	ENSRNOG00000060320(Lin28a),ENSRNOG00000000934(Piwil1),ENSRNOG00000052968(Hnrnpa3),ENSRNOG00000019817(Ddx28),	2.20721	0.0793114	1
GO:0016853	isomerase activity	molecular_function	5	301	149	19765	ENSRNOG00000007023(Galm),ENSRNOG00000057934(Tmx1),ENSRNOG00000010572(Pus7),ENSRNOG00000006462(Ero1l),ENSRNOG00000018574(Qsox2),	2.20351	0.0604599	1
GO:1990778	protein localization to cell periphery	biological_process	6	301	179	19765	ENSRNOG00000015602(Cdh2),ENSRNOG00000057221(Scn3b),ENSRNOG00000004276(Itga3),ENSRNOG00000007744(Ehd3),ENSRNOG00000018009(Rab8b),ENSRNOG00000013166(Wnt4),	2.20104	0.046081	1
GO:0019897	extrinsic component of plasma membrane	cellular_component	4	301	120	19765	ENSRNOG00000015602(Cdh2),ENSRNOG00000001285(Atp2a2),ENSRNOG00000047080(Gng4),ENSRNOG00000036745(Gna13),	2.18882	0.0816349	1
GO:0032970	regulation of actin filament-based process	biological_process	9	301	272	19765	ENSRNOG00000019220(Rhod),ENSRNOG00000009571(Wipf3),ENSRNOG00000001285(Atp2a2),ENSRNOG00000013166(Wnt4),ENSRNOG00000031162(Ccl24),ENSRNOG00000016133(Sumo1),ENSRNOG00000028946(Cdc42ep4),ENSRNOG00000059801(Lima1),ENSRNOG00000025406(Iqgap2),	2.17272	0.0220485	0.944778
GO:0036294	cellular response to decreased oxygen levels	biological_process	4	301	121	19765	ENSRNOG00000002265(Casr),ENSRNOG00000016448(Eef2k),ENSRNOG00000002255(Fam162a),ENSRNOG00000006462(Ero1l),	2.17073	0.0839992	1
GO:0001763	morphogenesis of a branching structure	biological_process	7	301	212	19765	ENSRNOG00000020482(Nfatc4),ENSRNOG00000005616(Ncoa3),ENSRNOG00000010649(Ctnnd2),ENSRNOG00000013166(Wnt4),ENSRNOG00000031916(Timeless),ENSRNOG00000002265(Casr),ENSRNOG00000036745(Gna13),	2.16817	0.0378326	1
GO:0034976	response to endoplasmic reticulum stress	biological_process	6	301	182	19765	ENSRNOG00000007203(Psmc6),ENSRNOG00000001285(Atp2a2),ENSRNOG00000008022(Apaf1),ENSRNOG00000057934(Tmx1),ENSRNOG00000006462(Ero1l),ENSRNOG00000005749(Foxred2),	2.16476	0.0497232	1
GO:0051259	protein oligomerization	biological_process	13	301	396	19765	ENSRNOG00000017181(Malt1),ENSRNOG00000009783(Camk2g),ENSRNOG00000014935(Peo1),ENSRNOG00000015746(Kcng4),ENSRNOG00000015602(Cdh2),ENSRNOG00000007744(Ehd3),ENSRNOG00000011975(Crtc3),ENSRNOG00000027091(Kctd18),ENSRNOG00000059765(Asic1),ENSRNOG00000032224(Hist1h4b),ENSRNOG00000006523(Atl2),ENSRNOG00000019630(Hacl1),ENSRNOG00000008022(Apaf1),	2.15565	0.00833739	0.595429
GO:0012506	vesicle membrane	cellular_component	8	301	244	19765	ENSRNOG00000001285(Atp2a2),ENSRNOG00000048932(Smagp),ENSRNOG00000018009(Rab8b),ENSRNOG00000048606(Vma21),ENSRNOG00000058940(Rab11fip1),ENSRNOG00000011820(Acpp),ENSRNOG00000008619(Agtrap),ENSRNOG00000019629(Lamp1),	2.15293	0.0302268	1
GO:0016197	endosomal transport	biological_process	6	301	184	19765	ENSRNOG00000018901(Rab14),ENSRNOG00000030118(Msn),ENSRNOG00000010794(Dennd3),ENSRNOG00000026748(Dennd2a),ENSRNOG00000003971(Gosr1),ENSRNOG00000007744(Ehd3),	2.14123	0.0522579	1
GO:0051260	protein homooligomerization	biological_process	8	301	246	19765	ENSRNOG00000008022(Apaf1),ENSRNOG00000015746(Kcng4),ENSRNOG00000006523(Atl2),ENSRNOG00000014935(Peo1),ENSRNOG00000007744(Ehd3),ENSRNOG00000027091(Kctd18),ENSRNOG00000011975(Crtc3),ENSRNOG00000059765(Asic1),	2.13543	0.0316504	1
GO:0065004	protein-DNA complex assembly	biological_process	4	301	123	19765	ENSRNOG00000021555(Mis18a),ENSRNOG00000007203(Psmc6),ENSRNOG00000024178(Cenpt),ENSRNOG00000032224(Hist1h4b),	2.13543	0.0888505	1
GO:0016050	vesicle organization	biological_process	6	301	185	19765	ENSRNOG00000000394(Srgn),ENSRNOG00000003971(Gosr1),ENSRNOG00000018009(Rab8b),ENSRNOG00000018901(Rab14),ENSRNOG00000019318(Syt3),ENSRNOG00000033101(Myo18a),	2.12966	0.0535576	1
GO:0005759	mitochondrial matrix	cellular_component	7	301	216	19765	ENSRNOG00000001073(RGD1563482),ENSRNOG00000052506(Ak3),ENSRNOG00000010855(Mrp63),ENSRNOG00000019817(Ddx28),ENSRNOG00000036918(Mettl20),ENSRNOG00000019165(Mrpl51),ENSRNOG00000014935(Peo1),	2.12801	0.0416136	1
GO:0007264	small GTPase mediated signal transduction	biological_process	15	301	465	19765	ENSRNOG00000027592(Rerg),ENSRNOG00000018714(Arl5b),ENSRNOG00000054385(Rhebl1),ENSRNOG00000025406(Iqgap2),ENSRNOG00000000956(Rasl11a),ENSRNOG00000028946(Cdc42ep4),ENSRNOG00000032703(Rasgrp3),ENSRNOG00000018009(Rab8b),ENSRNOG00000019220(Rhod),ENSRNOG00000014083(Iqsec3),ENSRNOG00000018901(Rab14),ENSRNOG00000036745(Gna13),ENSRNOG00000015602(Cdh2),ENSRNOG00000004276(Itga3),ENSRNOG00000000633(Rhobtb1),	2.11821	0.00594294	0.473777
GO:0050839	cell adhesion molecule binding	molecular_function	5	301	155	19765	ENSRNOG00000030118(Msn),ENSRNOG00000048932(Smagp),ENSRNOG00000002265(Casr),ENSRNOG00000004276(Itga3),ENSRNOG00000026702(Amica1),	2.11821	0.0707932	1
GO:0045619	regulation of lymphocyte differentiation	biological_process	4	301	124	19765	ENSRNOG00000049137(Zfp35),ENSRNOG00000026762(RT1-DOa),ENSRNOG00000025111(Nfkbid),ENSRNOG00000025222(Pcid2),	2.11821	0.0913377	1
GO:0030833	regulation of actin filament polymerization	biological_process	4	301	125	19765	ENSRNOG00000028946(Cdc42ep4),ENSRNOG00000009571(Wipf3),ENSRNOG00000025406(Iqgap2),ENSRNOG00000031162(Ccl24),	2.10126	0.093866	1
GO:0006457	protein folding	biological_process	5	301	157	19765	ENSRNOG00000017975(Dnajb13),ENSRNOG00000018574(Qsox2),ENSRNOG00000006462(Ero1l),ENSRNOG00000057934(Tmx1),ENSRNOG00000010967(Cdc37l1),	2.09122	0.0744742	1
GO:0030029	actin filament-based process	biological_process	17	301	535	19765	ENSRNOG00000033101(Myo18a),ENSRNOG00000031162(Ccl24),ENSRNOG00000009571(Wipf3),ENSRNOG00000016133(Sumo1),ENSRNOG00000028946(Cdc42ep4),ENSRNOG00000059801(Lima1),ENSRNOG00000049695(Myh1),ENSRNOG00000016983(Myh7),ENSRNOG00000057221(Scn3b),ENSRNOG00000019220(Rhod),ENSRNOG00000001285(Atp2a2),ENSRNOG00000013166(Wnt4),ENSRNOG00000002215(Mylk),ENSRNOG00000004345(Daam1),ENSRNOG00000025406(Iqgap2),ENSRNOG0…	2.08653	0.00429592	0.409067
GO:0016323	basolateral plasma membrane	cellular_component	6	301	189	19765	ENSRNOG00000015602(Cdh2),ENSRNOG00000004276(Itga3),ENSRNOG00000030118(Msn),ENSRNOG00000005957(Slc4a7),ENSRNOG00000002265(Casr),ENSRNOG00000021200(Hfe2),	2.08459	0.058976	1
GO:0097060	synaptic membrane	cellular_component	6	301	190	19765	ENSRNOG00000013610(Chrna5),ENSRNOG00000026466(Lrrtm3),ENSRNOG00000014083(Iqsec3),ENSRNOG00000013171(Grm2),ENSRNOG00000004276(Itga3),ENSRNOG00000011071(Nt5e),	2.07361	0.0603862	1
GO:0010256	endomembrane system organization	biological_process	13	301	412	19765	ENSRNOG00000047620(Golph3l),ENSRNOG00000006523(Atl2),ENSRNOG00000016133(Sumo1),ENSRNOG00000017383(l7Rn6),ENSRNOG00000013166(Wnt4),ENSRNOG00000018009(Rab8b),ENSRNOG00000001285(Atp2a2),ENSRNOG00000000394(Srgn),ENSRNOG00000057221(Scn3b),ENSRNOG00000015602(Cdh2),ENSRNOG00000007744(Ehd3),ENSRNOG00000033101(Myo18a),ENSRNOG00000004276(Itga3),	2.07194	0.0115636	0.671863
GO:0002768	immune response-regulating cell surface receptor signaling pathway	biological_process	4	301	127	19765	ENSRNOG00000012965(Themis2),ENSRNOG00000017181(Malt1),ENSRNOG00000011321(Rftn1),ENSRNOG00000003298(Cd247),	2.06817	0.0990459	1
GO:0016887	ATPase activity	molecular_function	12	301	381	19765	ENSRNOG00000025757(Myh6),ENSRNOG00000019817(Ddx28),ENSRNOG00000016983(Myh7),ENSRNOG00000049695(Myh1),ENSRNOG00000046276(Myh3),ENSRNOG00000001134(Rfc5),ENSRNOG00000001285(Atp2a2),ENSRNOG00000000457(Tap1),ENSRNOG00000007203(Psmc6),ENSRNOG00000023312(Lonrf2),ENSRNOG00000016655(Pex6),ENSRNOG00000000841(Ddx39b),	2.06817	0.0147912	0.745649
GO:0006417	regulation of translation	biological_process	8	301	256	19765	ENSRNOG00000020658(Aarsd1),ENSRNOG00000011859(Eif5a2),ENSRNOG00000001161(Gatc),ENSRNOG00000000841(Ddx39b),ENSRNOG00000001073(RGD1563482),ENSRNOG00000031544(Larp1),ENSRNOG00000001050(Eif2ak1),ENSRNOG00000060320(Lin28a),	2.05201	0.0395145	1
GO:0016829	lyase activity	molecular_function	5	301	160	19765	ENSRNOG00000009250(Pts),ENSRNOG00000011573(Csad),ENSRNOG00000024128(Aco2),ENSRNOG00000019630(Hacl1),ENSRNOG00000012264(Alkbh1),	2.05201	0.0802211	1
GO:0005802	trans-Golgi network	cellular_component	4	301	128	19765	ENSRNOG00000033101(Myo18a),ENSRNOG00000047620(Golph3l),ENSRNOG00000016953(Chst4),ENSRNOG00000018901(Rab14),	2.05201	0.101698	1
GO:0045055	regulated exocytosis	biological_process	5	301	161	19765	ENSRNOG00000001285(Atp2a2),ENSRNOG00000018009(Rab8b),ENSRNOG00000058940(Rab11fip1),ENSRNOG00000019318(Syt3),ENSRNOG00000019629(Lamp1),	2.03927	0.0821973	1
GO:0051147	regulation of muscle cell differentiation	biological_process	4	301	129	19765	ENSRNOG00000001189(Sik1),ENSRNOG00000000841(Ddx39b),ENSRNOG00000009184(Foxp1),ENSRNOG00000013674(Megf10),	2.03611	0.104391	1
GO:0019900	kinase binding	molecular_function	17	301	550	19765	ENSRNOG00000030118(Msn),ENSRNOG00000004158(Hdac9),ENSRNOG00000025895(Sdpr),ENSRNOG00000038184(Camk2n2),ENSRNOG00000015602(Cdh2),ENSRNOG00000000934(Piwil1),ENSRNOG00000052061(Ppef2),ENSRNOG00000001189(Sik1),ENSRNOG00000027787(Cdc6),ENSRNOG00000001426(Prkrip1),ENSRNOG00000019220(Rhod),ENSRNOG00000008065(Wwc1),ENSRNOG00000049115(Ccr5),ENSRNOG00000002265(Casr),ENSRNOG00000025757(Myh6),ENSRNOG00000032…	2.02963	0.00569278	0.475972
GO:0051495	positive regulation of cytoskeleton organization	biological_process	5	301	162	19765	ENSRNOG00000031162(Ccl24),ENSRNOG00000025406(Iqgap2),ENSRNOG00000028946(Cdc42ep4),ENSRNOG00000013166(Wnt4),ENSRNOG00000009571(Wipf3),	2.02668	0.0842038	1
GO:0006836	neurotransmitter transport	biological_process	5	301	162	19765	ENSRNOG00000019318(Syt3),ENSRNOG00000001285(Atp2a2),ENSRNOG00000018009(Rab8b),ENSRNOG00000013171(Grm2),ENSRNOG00000059765(Asic1),	2.02668	0.0842038	1
GO:0050804	modulation of synaptic transmission	biological_process	9	301	292	19765	ENSRNOG00000010649(Ctnnd2),ENSRNOG00000059765(Asic1),ENSRNOG00000006639(Scn9a),ENSRNOG00000038184(Camk2n2),ENSRNOG00000020482(Nfatc4),ENSRNOG00000001285(Atp2a2),ENSRNOG00000013171(Grm2),ENSRNOG00000009826(Bche),ENSRNOG00000009783(Camk2g),	2.0239	0.034008	1
GO:0031032	actomyosin structure organization	biological_process	4	301	130	19765	ENSRNOG00000025757(Myh6),ENSRNOG00000013166(Wnt4),ENSRNOG00000009184(Foxp1),ENSRNOG00000033101(Myo18a),	2.02044	0.107125	1
GO:0071453	cellular response to oxygen levels	biological_process	4	301	130	19765	ENSRNOG00000002255(Fam162a),ENSRNOG00000016448(Eef2k),ENSRNOG00000002265(Casr),ENSRNOG00000006462(Ero1l),	2.02044	0.107125	1
GO:0003924	GTPase activity	molecular_function	6	301	196	19765	ENSRNOG00000018901(Rab14),ENSRNOG00000027592(Rerg),ENSRNOG00000018009(Rab8b),ENSRNOG00000002509(Gnl3l),ENSRNOG00000036745(Gna13),ENSRNOG00000006523(Atl2),	2.01014	0.0693235	1
GO:0051020	GTPase binding	molecular_function	7	301	229	19765	ENSRNOG00000058940(Rab11fip1),ENSRNOG00000014584(Odf2),ENSRNOG00000004345(Daam1),ENSRNOG00000025406(Iqgap2),ENSRNOG00000028946(Cdc42ep4),ENSRNOG00000032703(Rasgrp3),ENSRNOG00000003457(Ccdc64b),	2.00721	0.0557396	1
GO:0000139	Golgi membrane	cellular_component	10	301	328	19765	ENSRNOG00000036866(Acer3),ENSRNOG00000000394(Srgn),ENSRNOG00000003971(Gosr1),ENSRNOG00000008619(Agtrap),ENSRNOG00000012037(Galnt7),ENSRNOG00000033101(Myo18a),ENSRNOG00000016953(Chst4),ENSRNOG00000047620(Golph3l),ENSRNOG00000018574(Qsox2),ENSRNOG00000000417(Numa1),	2.00196	0.029166	1
GO:0098797	plasma membrane protein complex	cellular_component	13	301	428	19765	ENSRNOG00000015602(Cdh2),ENSRNOG00000015746(Kcng4),ENSRNOG00000004276(Itga3),ENSRNOG00000038999(RT1-A1),ENSRNOG00000047080(Gng4),ENSRNOG00000013610(Chrna5),ENSRNOG00000021200(Hfe2),ENSRNOG00000036745(Gna13),ENSRNOG00000003298(Cd247),ENSRNOG00000060693(AC118147.2),ENSRNOG00000016133(Sumo1),ENSRNOG00000026762(RT1-DOa),ENSRNOG00000006639(Scn9a),	1.99448	0.0157217	0.769913
GO:0061138	morphogenesis of a branching epithelium	biological_process	6	301	198	19765	ENSRNOG00000036745(Gna13),ENSRNOG00000002265(Casr),ENSRNOG00000013166(Wnt4),ENSRNOG00000031916(Timeless),ENSRNOG00000005616(Ncoa3),ENSRNOG00000020482(Nfatc4),	1.98983	0.072487	1
GO:0030324	lung development	biological_process	6	301	198	19765	ENSRNOG00000009348(Nos3),ENSRNOG00000017383(l7Rn6),ENSRNOG00000009184(Foxp1),ENSRNOG00000031916(Timeless),ENSRNOG00000000417(Numa1),ENSRNOG00000004276(Itga3),	1.98983	0.072487	1
GO:0045088	regulation of innate immune response	biological_process	5	301	165	19765	ENSRNOG00000011321(Rftn1),ENSRNOG00000038999(RT1-A1),ENSRNOG00000019629(Lamp1),ENSRNOG00000000457(Tap1),ENSRNOG00000048932(Smagp),	1.98983	0.0904071	1
GO:0051648	vesicle localization	biological_process	5	301	165	19765	ENSRNOG00000003971(Gosr1),ENSRNOG00000001285(Atp2a2),ENSRNOG00000018009(Rab8b),ENSRNOG00000019318(Syt3),ENSRNOG00000015602(Cdh2),	1.98983	0.0904071	1
GO:0017111	nucleoside-triphosphatase activity	molecular_function	20	301	662	19765	ENSRNOG00000014935(Peo1),ENSRNOG00000016655(Pex6),ENSRNOG00000002509(Gnl3l),ENSRNOG00000001285(Atp2a2),ENSRNOG00000007203(Psmc6),ENSRNOG00000001134(Rfc5),ENSRNOG00000025757(Myh6),ENSRNOG00000027592(Rerg),ENSRNOG00000019817(Ddx28),ENSRNOG00000033101(Myo18a),ENSRNOG00000000841(Ddx39b),ENSRNOG00000023312(Lonrf2),ENSRNOG00000036745(Gna13),ENSRNOG00000018009(Rab8b),ENSRNOG00000000457(Tap1),ENSRNOG0000…	1.98382	0.00387279	0.402301
GO:0050803	regulation of synapse structure or activity	biological_process	7	301	232	19765	ENSRNOG00000010649(Ctnnd2),ENSRNOG00000038184(Camk2n2),ENSRNOG00000020482(Nfatc4),ENSRNOG00000015602(Cdh2),ENSRNOG00000016448(Eef2k),ENSRNOG00000009783(Camk2g),ENSRNOG00000026466(Lrrtm3),	1.98126	0.059418	1
GO:0007009	plasma membrane organization	biological_process	7	301	232	19765	ENSRNOG00000004276(Itga3),ENSRNOG00000007744(Ehd3),ENSRNOG00000057221(Scn3b),ENSRNOG00000015602(Cdh2),ENSRNOG00000018009(Rab8b),ENSRNOG00000001285(Atp2a2),ENSRNOG00000013166(Wnt4),	1.98126	0.059418	1
GO:0010608	posttranscriptional regulation of gene expression	biological_process	9	301	300	19765	ENSRNOG00000001073(RGD1563482),ENSRNOG00000031544(Larp1),ENSRNOG00000001050(Eif2ak1),ENSRNOG00000060320(Lin28a),ENSRNOG00000020658(Aarsd1),ENSRNOG00000011859(Eif5a2),ENSRNOG00000025222(Pcid2),ENSRNOG00000001161(Gatc),ENSRNOG00000000841(Ddx39b),	1.96993	0.0399341	1
GO:0016462	pyrophosphatase activity	molecular_function	21	301	700	19765	ENSRNOG00000016983(Myh7),ENSRNOG00000046276(Myh3),ENSRNOG00000049695(Myh1),ENSRNOG00000006523(Atl2),ENSRNOG00000013110(Nudt2),ENSRNOG00000036745(Gna13),ENSRNOG00000023312(Lonrf2),ENSRNOG00000018901(Rab14),ENSRNOG00000018009(Rab8b),ENSRNOG00000000457(Tap1),ENSRNOG00000033101(Myo18a),ENSRNOG00000000841(Ddx39b),ENSRNOG00000019817(Ddx28),ENSRNOG00000025757(Myh6),ENSRNOG00000027592(Rerg),ENSRNOG000000…	1.96993	0.00343559	0.40611
GO:0030323	respiratory tube development	biological_process	6	301	201	19765	ENSRNOG00000000417(Numa1),ENSRNOG00000004276(Itga3),ENSRNOG00000017383(l7Rn6),ENSRNOG00000031916(Timeless),ENSRNOG00000009184(Foxp1),ENSRNOG00000009348(Nos3),	1.96013	0.0774081	1
GO:0002443	leukocyte mediated immunity	biological_process	7	301	235	19765	ENSRNOG00000048932(Smagp),ENSRNOG00000000457(Tap1),ENSRNOG00000021614(Kmt2e),ENSRNOG00000017181(Malt1),ENSRNOG00000011321(Rftn1),ENSRNOG00000038999(RT1-A1),ENSRNOG00000019629(Lamp1),	1.95596	0.0632598	1
GO:0008154	actin polymerization or depolymerization	biological_process	5	301	168	19765	ENSRNOG00000009571(Wipf3),ENSRNOG00000031162(Ccl24),ENSRNOG00000025406(Iqgap2),ENSRNOG00000059801(Lima1),ENSRNOG00000028946(Cdc42ep4),	1.9543	0.0968874	1
GO:0016818	hydrolase activity, acting on acid anhydrides, in phosphorus-containing anhydrides	molecular_function	21	301	706	19765	ENSRNOG00000019817(Ddx28),ENSRNOG00000025757(Myh6),ENSRNOG00000027592(Rerg),ENSRNOG00000001134(Rfc5),ENSRNOG00000007203(Psmc6),ENSRNOG00000002509(Gnl3l),ENSRNOG00000001285(Atp2a2),ENSRNOG00000016655(Pex6),ENSRNOG00000014935(Peo1),ENSRNOG00000016983(Myh7),ENSRNOG00000049695(Myh1),ENSRNOG00000006523(Atl2),ENSRNOG00000013110(Nudt2),ENSRNOG00000046276(Myh3),ENSRNOG00000018901(Rab14),ENSRNOG0000001800…	1.95319	0.00379969	0.420172
GO:0034703	cation channel complex	cellular_component	4	301	135	19765	ENSRNOG00000016133(Sumo1),ENSRNOG00000015746(Kcng4),ENSRNOG00000060693(AC118147.2),ENSRNOG00000006639(Scn9a),	1.94561	0.121414	1
GO:0071773	cellular response to BMP stimulus	biological_process	4	301	135	19765	ENSRNOG00000025757(Myh6),ENSRNOG00000021200(Hfe2),ENSRNOG00000003261(Usp9x),ENSRNOG00000004276(Itga3),	1.94561	0.121414	1
GO:0071560	cellular response to transforming growth factor beta stimulus	biological_process	5	301	169	19765	ENSRNOG00000013166(Wnt4),ENSRNOG00000003261(Usp9x),ENSRNOG00000039859(Dnmt1),ENSRNOG00000008022(Apaf1),ENSRNOG00000004276(Itga3),	1.94274	0.0991093	1
GO:0046777	protein autophosphorylation	biological_process	6	301	203	19765	ENSRNOG00000001189(Sik1),ENSRNOG00000003063(Phka1),ENSRNOG00000001050(Eif2ak1),ENSRNOG00000025423(Map3k13),ENSRNOG00000016448(Eef2k),ENSRNOG00000009783(Camk2g),	1.94082	0.0808073	1
GO:0016817	hydrolase activity, acting on acid anhydrides	molecular_function	21	301	713	19765	ENSRNOG00000014935(Peo1),ENSRNOG00000016655(Pex6),ENSRNOG00000001285(Atp2a2),ENSRNOG00000002509(Gnl3l),ENSRNOG00000007203(Psmc6),ENSRNOG00000001134(Rfc5),ENSRNOG00000027592(Rerg),ENSRNOG00000025757(Myh6),ENSRNOG00000019817(Ddx28),ENSRNOG00000033101(Myo18a),ENSRNOG00000000841(Ddx39b),ENSRNOG00000023312(Lonrf2),ENSRNOG00000036745(Gna13),ENSRNOG00000000457(Tap1),ENSRNOG00000018009(Rab8b),ENSRNOG0000…	1.93402	0.00426541	0.417767
GO:0022843	voltage-gated cation channel activity	molecular_function	4	301	136	19765	ENSRNOG00000015746(Kcng4),ENSRNOG00000057221(Scn3b),ENSRNOG00000020444(Hcn3),ENSRNOG00000006639(Scn9a),	1.93131	0.124395	1
GO:0048193	Golgi vesicle transport	biological_process	5	301	171	19765	ENSRNOG00000000230(Lmf1),ENSRNOG00000033101(Myo18a),ENSRNOG00000019629(Lamp1),ENSRNOG00000018009(Rab8b),ENSRNOG00000003971(Gosr1),	1.92001	0.103646	1
GO:0007612	learning	biological_process	4	301	137	19765	ENSRNOG00000059765(Asic1),ENSRNOG00000009826(Bche),ENSRNOG00000004730(Meis2),ENSRNOG00000010649(Ctnnd2),	1.91721	0.127417	1
GO:0048738	cardiac muscle tissue development	biological_process	5	301	172	19765	ENSRNOG00000001189(Sik1),ENSRNOG00000000841(Ddx39b),ENSRNOG00000025757(Myh6),ENSRNOG00000009184(Foxp1),ENSRNOG00000016983(Myh7),	1.90885	0.105962	1
GO:0022604	regulation of cell morphogenesis	biological_process	13	301	448	19765	ENSRNOG00000020482(Nfatc4),ENSRNOG00000049115(Ccr5),ENSRNOG00000031162(Ccl24),ENSRNOG00000015602(Cdh2),ENSRNOG00000019692(Metrn),ENSRNOG00000030118(Msn),ENSRNOG00000009571(Wipf3),ENSRNOG00000036745(Gna13),ENSRNOG00000016448(Eef2k),ENSRNOG00000028946(Cdc42ep4),ENSRNOG00000019318(Syt3),ENSRNOG00000027434(Fitm2),ENSRNOG00000014584(Odf2),	1.90544	0.0224938	0.940351
GO:0061025	membrane fusion	biological_process	4	301	138	19765	ENSRNOG00000021213(Lix1l),ENSRNOG00000019318(Syt3),ENSRNOG00000018009(Rab8b),ENSRNOG00000003971(Gosr1),	1.90332	0.13048	1
GO:0032956	regulation of actin cytoskeleton organization	biological_process	7	301	242	19765	ENSRNOG00000009571(Wipf3),ENSRNOG00000019220(Rhod),ENSRNOG00000013166(Wnt4),ENSRNOG00000028946(Cdc42ep4),ENSRNOG00000059801(Lima1),ENSRNOG00000025406(Iqgap2),ENSRNOG00000031162(Ccl24),	1.89938	0.0728749	1
GO:0071559	response to transforming growth factor beta	biological_process	5	301	173	19765	ENSRNOG00000013166(Wnt4),ENSRNOG00000003261(Usp9x),ENSRNOG00000008022(Apaf1),ENSRNOG00000039859(Dnmt1),ENSRNOG00000004276(Itga3),	1.89782	0.108308	1
GO:0007266	Rho protein signal transduction	biological_process	4	301	139	19765	ENSRNOG00000036745(Gna13),ENSRNOG00000028946(Cdc42ep4),ENSRNOG00000015602(Cdh2),ENSRNOG00000004276(Itga3),	1.88962	0.133584	1
GO:0030017	sarcomere	cellular_component	4	301	139	19765	ENSRNOG00000057221(Scn3b),ENSRNOG00000014409(Myl7),ENSRNOG00000025757(Myh6),ENSRNOG00000016983(Myh7),	1.88962	0.133584	1
GO:0019901	protein kinase binding	molecular_function	14	301	488	19765	ENSRNOG00000001189(Sik1),ENSRNOG00000012818(Ksr1),ENSRNOG00000000934(Piwil1),ENSRNOG00000052061(Ppef2),ENSRNOG00000025757(Myh6),ENSRNOG00000002265(Casr),ENSRNOG00000038184(Camk2n2),ENSRNOG00000049115(Ccr5),ENSRNOG00000015602(Cdh2),ENSRNOG00000025895(Sdpr),ENSRNOG00000030118(Msn),ENSRNOG00000019220(Rhod),ENSRNOG00000004158(Hdac9),ENSRNOG00000001426(Prkrip1),	1.88382	0.020435	0.909757
GO:0048037	cofactor binding	molecular_function	8	301	279	19765	ENSRNOG00000005749(Foxred2),ENSRNOG00000011573(Csad),ENSRNOG00000012436(Adh6),ENSRNOG00000009348(Nos3),ENSRNOG00000055408(Gcat),ENSRNOG00000003622(Cybb),ENSRNOG00000019630(Hacl1),ENSRNOG00000050828(Vkorc1),	1.88285	0.0627823	1
GO:0017157	regulation of exocytosis	biological_process	4	301	140	19765	ENSRNOG00000001285(Atp2a2),ENSRNOG00000018009(Rab8b),ENSRNOG00000019318(Syt3),ENSRNOG00000019629(Lamp1),	1.87613	0.136729	1
GO:0030041	actin filament polymerization	biological_process	4	301	140	19765	ENSRNOG00000028946(Cdc42ep4),ENSRNOG00000025406(Iqgap2),ENSRNOG00000031162(Ccl24),ENSRNOG00000009571(Wipf3),	1.87613	0.136729	1
GO:0071241	cellular response to inorganic substance	biological_process	4	301	141	19765	ENSRNOG00000039859(Dnmt1),ENSRNOG00000020482(Nfatc4),ENSRNOG00000016448(Eef2k),ENSRNOG00000019830(Hsd17b1),	1.86282	0.139915	1
GO:0005925	focal adhesion	cellular_component	9	301	320	19765	ENSRNOG00000030118(Msn),ENSRNOG00000036745(Gna13),ENSRNOG00000015602(Cdh2),ENSRNOG00000004276(Itga3),ENSRNOG00000007744(Ehd3),ENSRNOG00000025757(Myh6),ENSRNOG00000016983(Myh7),ENSRNOG00000011228(Layn),ENSRNOG00000059801(Lima1),	1.84681	0.0579952	1
GO:0045202	synapse	cellular_component	18	301	641	19765	ENSRNOG00000015602(Cdh2),ENSRNOG00000009783(Camk2g),ENSRNOG00000020444(Hcn3),ENSRNOG00000016448(Eef2k),ENSRNOG00000005957(Slc4a7),ENSRNOG00000018009(Rab8b),ENSRNOG00000010649(Ctnnd2),ENSRNOG00000016133(Sumo1),ENSRNOG00000019629(Lamp1),ENSRNOG00000004276(Itga3),ENSRNOG00000013610(Chrna5),ENSRNOG00000013171(Grm2),ENSRNOG00000014083(Iqsec3),ENSRNOG00000014409(Myl7),ENSRNOG00000001285(Atp2a2),ENSRNOG…	1.84393	0.0122296	0.687263
GO:0051604	protein maturation	biological_process	7	301	250	19765	ENSRNOG00000000230(Lmf1),ENSRNOG00000006462(Ero1l),ENSRNOG00000008022(Apaf1),ENSRNOG00000002255(Fam162a),ENSRNOG00000020377(Cideb),ENSRNOG00000021200(Hfe2),ENSRNOG00000000394(Srgn),	1.8386	0.0850124	1
GO:0007015	actin filament organization	biological_process	8	301	286	19765	ENSRNOG00000031162(Ccl24),ENSRNOG00000013166(Wnt4),ENSRNOG00000019220(Rhod),ENSRNOG00000009571(Wipf3),ENSRNOG00000002215(Mylk),ENSRNOG00000059801(Lima1),ENSRNOG00000028946(Cdc42ep4),ENSRNOG00000025406(Iqgap2),	1.83677	0.071432	1
GO:1902495	transmembrane transporter complex	cellular_component	7	301	251	19765	ENSRNOG00000015746(Kcng4),ENSRNOG00000060693(AC118147.2),ENSRNOG00000016133(Sumo1),ENSRNOG00000001285(Atp2a2),ENSRNOG00000005491(Best3),ENSRNOG00000013610(Chrna5),ENSRNOG00000006639(Scn9a),	1.83128	0.0866177	1
GO:0016874	ligase activity	molecular_function	7	301	251	19765	ENSRNOG00000017157(Trim69),ENSRNOG00000055408(Gcat),ENSRNOG00000007102(Acss1),ENSRNOG00000015734(Ube3a),ENSRNOG00000005193(Pfas),ENSRNOG00000020658(Aarsd1),ENSRNOG00000001161(Gatc),	1.83128	0.0866177	1
GO:0000793	condensed chromosome	cellular_component	4	301	144	19765	ENSRNOG00000001453(Baz1b),ENSRNOG00000024178(Cenpt),ENSRNOG00000032929(Incenp),ENSRNOG00000015787(P3h4),	1.82401	0.149714	1
GO:0017076	purine nucleotide binding	molecular_function	48	301	1733	19765	ENSRNOG00000001189(Sik1),ENSRNOG00000006523(Atl2),ENSRNOG00000013110(Nudt2),ENSRNOG00000049695(Myh1),ENSRNOG00000052506(Ak3),ENSRNOG00000000841(Ddx39b),ENSRNOG00000033101(Myo18a),ENSRNOG00000000633(Rhobtb1),ENSRNOG00000018009(Rab8b),ENSRNOG00000018901(Rab14),ENSRNOG00000020444(Hcn3),ENSRNOG00000001187(Oasl),ENSRNOG00000012818(Ksr1),ENSRNOG00000008022(Apaf1),ENSRNOG00000002215(Mylk),ENSRNOG0000000…	1.81875	0.000123656	0.211947
GO:0005924	cell-substrate adherens junction	cellular_component	9	301	325	19765	ENSRNOG00000011228(Layn),ENSRNOG00000025757(Myh6),ENSRNOG00000016983(Myh7),ENSRNOG00000059801(Lima1),ENSRNOG00000036745(Gna13),ENSRNOG00000030118(Msn),ENSRNOG00000004276(Itga3),ENSRNOG00000007744(Ehd3),ENSRNOG00000015602(Cdh2),	1.8184	0.0632906	1
GO:0016032	viral process	biological_process	5	301	181	19765	ENSRNOG00000001187(Oasl),ENSRNOG00000000457(Tap1),ENSRNOG00000024194(Rsf1),ENSRNOG00000049115(Ccr5),ENSRNOG00000000841(Ddx39b),	1.81394	0.128205	1
GO:0032549	ribonucleoside binding	molecular_function	47	301	1703	19765	ENSRNOG00000007744(Ehd3),ENSRNOG00000014628(Pomk),ENSRNOG00000016448(Eef2k),ENSRNOG00000009783(Camk2g),ENSRNOG00000036745(Gna13),ENSRNOG00000000457(Tap1),ENSRNOG00000001161(Gatc),ENSRNOG00000019208(P2rx5),ENSRNOG00000046276(Myh3),ENSRNOG00000021719(Slfn5),ENSRNOG00000007102(Acss1),ENSRNOG00000000956(Rasl11a),ENSRNOG00000027787(Cdc6),ENSRNOG00000001050(Eif2ak1),ENSRNOG00000016983(Myh7),ENSRNOG0000…	1.81223	0.000156475	0.107279
GO:0001883	purine nucleoside binding	molecular_function	47	301	1703	19765	ENSRNOG00000001285(Atp2a2),ENSRNOG00000002509(Gnl3l),ENSRNOG00000020658(Aarsd1),ENSRNOG00000014049(Riok1),ENSRNOG00000028913(LOC688970),ENSRNOG00000015150(Spg7),ENSRNOG00000025423(Map3k13),ENSRNOG00000054385(Rhebl1),ENSRNOG00000018714(Arl5b),ENSRNOG00000025757(Myh6),ENSRNOG00000027592(Rerg),ENSRNOG00000005193(Pfas),ENSRNOG00000019817(Ddx28),ENSRNOG00000002215(Mylk),ENSRNOG00000001134(Rfc5),ENSRNO…	1.81223	0.000156475	0.107279
GO:0042692	muscle cell differentiation	biological_process	9	301	327	19765	ENSRNOG00000001285(Atp2a2),ENSRNOG00000013166(Wnt4),ENSRNOG00000020482(Nfatc4),ENSRNOG00000015602(Cdh2),ENSRNOG00000000841(Ddx39b),ENSRNOG00000025757(Myh6),ENSRNOG00000013674(Megf10),ENSRNOG00000009184(Foxp1),ENSRNOG00000001189(Sik1),	1.80728	0.0655009	1
GO:0001882	nucleoside binding	molecular_function	47	301	1709	19765	ENSRNOG00000038720(Cdkl1),ENSRNOG00000007203(Psmc6),ENSRNOG00000016655(Pex6),ENSRNOG00000014935(Peo1),ENSRNOG00000001050(Eif2ak1),ENSRNOG00000016983(Myh7),ENSRNOG00000027787(Cdc6),ENSRNOG00000000956(Rasl11a),ENSRNOG00000007102(Acss1),ENSRNOG00000021719(Slfn5),ENSRNOG00000046276(Myh3),ENSRNOG00000019208(P2rx5),ENSRNOG00000001161(Gatc),ENSRNOG00000000457(Tap1),ENSRNOG00000036745(Gna13),ENSRNOG00000…	1.80587	0.000169407	0.0725907
GO:0097367	carbohydrate derivative binding	molecular_function	56	301	2040	19765	ENSRNOG00000019318(Syt3),ENSRNOG00000011228(Layn),ENSRNOG00000038720(Cdkl1),ENSRNOG00000014935(Peo1),ENSRNOG00000009348(Nos3),ENSRNOG00000016655(Pex6),ENSRNOG00000007203(Psmc6),ENSRNOG00000021719(Slfn5),ENSRNOG00000046276(Myh3),ENSRNOG00000007102(Acss1),ENSRNOG00000027787(Cdc6),ENSRNOG00000000956(Rasl11a),ENSRNOG00000001050(Eif2ak1),ENSRNOG00000016983(Myh7),ENSRNOG00000025895(Sdpr),ENSRNOG0000000…	1.80255	4.6e-05	0.157602
GO:0004674	protein serine/threonine kinase activity	molecular_function	10	301	365	19765	ENSRNOG00000014049(Riok1),ENSRNOG00000003063(Phka1),ENSRNOG00000021200(Hfe2),ENSRNOG00000009783(Camk2g),ENSRNOG00000016448(Eef2k),ENSRNOG00000001189(Sik1),ENSRNOG00000002215(Mylk),ENSRNOG00000001050(Eif2ak1),ENSRNOG00000038720(Cdkl1),ENSRNOG00000025423(Map3k13),	1.79903	0.0568812	1
GO:0005819	spindle	cellular_component	6	301	219	19765	ENSRNOG00000032929(Incenp),ENSRNOG00000024450(Poc1b),ENSRNOG00000014584(Odf2),ENSRNOG00000000417(Numa1),ENSRNOG00000006082(Rmdn2),ENSRNOG00000027787(Cdc6),	1.79903	0.111496	1
GO:0090150	establishment of protein localization to membrane	biological_process	6	301	219	19765	ENSRNOG00000015602(Cdh2),ENSRNOG00000011321(Rftn1),ENSRNOG00000007744(Ehd3),ENSRNOG00000004276(Itga3),ENSRNOG00000013166(Wnt4),ENSRNOG00000018009(Rab8b),	1.79903	0.111496	1
GO:0006816	calcium ion transport	biological_process	9	301	329	19765	ENSRNOG00000016133(Sumo1),ENSRNOG00000002215(Mylk),ENSRNOG00000006462(Ero1l),ENSRNOG00000059765(Asic1),ENSRNOG00000002265(Casr),ENSRNOG00000001427(Orai2),ENSRNOG00000009348(Nos3),ENSRNOG00000009783(Camk2g),ENSRNOG00000001285(Atp2a2),	1.79629	0.0677646	1
GO:0030659	cytoplasmic vesicle membrane	cellular_component	6	301	220	19765	ENSRNOG00000019629(Lamp1),ENSRNOG00000008619(Agtrap),ENSRNOG00000058940(Rab11fip1),ENSRNOG00000018009(Rab8b),ENSRNOG00000048932(Smagp),ENSRNOG00000048606(Vma21),	1.79085	0.113624	1
GO:0030055	cell-substrate junction	cellular_component	9	301	330	19765	ENSRNOG00000059801(Lima1),ENSRNOG00000011228(Layn),ENSRNOG00000025757(Myh6),ENSRNOG00000016983(Myh7),ENSRNOG00000004276(Itga3),ENSRNOG00000007744(Ehd3),ENSRNOG00000015602(Cdh2),ENSRNOG00000036745(Gna13),ENSRNOG00000030118(Msn),	1.79085	0.0689167	1
GO:0048167	regulation of synaptic plasticity	biological_process	4	301	148	19765	ENSRNOG00000009783(Camk2g),ENSRNOG00000038184(Camk2n2),ENSRNOG00000020482(Nfatc4),ENSRNOG00000010649(Ctnnd2),	1.77471	0.163344	1
GO:0046982	protein heterodimerization activity	molecular_function	12	301	447	19765	ENSRNOG00000016983(Myh7),ENSRNOG00000031916(Timeless),ENSRNOG00000009184(Foxp1),ENSRNOG00000032224(Hist1h4b),ENSRNOG00000003622(Cybb),ENSRNOG00000032034(Supt5h),ENSRNOG00000024178(Cenpt),ENSRNOG00000000457(Tap1),ENSRNOG00000004300(Gtf2a1),ENSRNOG00000013610(Chrna5),ENSRNOG00000038999(RT1-A1),ENSRNOG00000004276(Itga3),	1.7628	0.0470542	1
GO:0030036	actin cytoskeleton organization	biological_process	13	301	485	19765	ENSRNOG00000004345(Daam1),ENSRNOG00000002215(Mylk),ENSRNOG00000059801(Lima1),ENSRNOG00000028946(Cdc42ep4),ENSRNOG00000025406(Iqgap2),ENSRNOG00000049695(Myh1),ENSRNOG00000025757(Myh6),ENSRNOG00000009184(Foxp1),ENSRNOG00000033101(Myo18a),ENSRNOG00000031162(Ccl24),ENSRNOG00000019220(Rhod),ENSRNOG00000009571(Wipf3),ENSRNOG00000013166(Wnt4),	1.76008	0.0407875	1
GO:0034702	ion channel complex	cellular_component	6	301	224	19765	ENSRNOG00000015746(Kcng4),ENSRNOG00000060693(AC118147.2),ENSRNOG00000016133(Sumo1),ENSRNOG00000005491(Best3),ENSRNOG00000006639(Scn9a),ENSRNOG00000013610(Chrna5),	1.75887	0.122386	1
GO:0030554	adenyl nucleotide binding	molecular_function	37	301	1385	19765	ENSRNOG00000001134(Rfc5),ENSRNOG00000002215(Mylk),ENSRNOG00000008022(Apaf1),ENSRNOG00000012818(Ksr1),ENSRNOG00000025423(Map3k13),ENSRNOG00000005193(Pfas),ENSRNOG00000019817(Ddx28),ENSRNOG00000025757(Myh6),ENSRNOG00000014049(Riok1),ENSRNOG00000028913(LOC688970),ENSRNOG00000015150(Spg7),ENSRNOG00000020658(Aarsd1),ENSRNOG00000001285(Atp2a2),ENSRNOG00000049695(Myh1),ENSRNOG00000001189(Sik1),ENSRNOG00…	1.75421	0.00129908	0.234381
GO:0005681	spliceosomal complex	cellular_component	4	301	150	19765	ENSRNOG00000000841(Ddx39b),ENSRNOG00000052968(Hnrnpa3),ENSRNOG00000007629(Sf3a3),ENSRNOG00000058561(Srrm2),	1.75105	0.170397	1
GO:2001235	positive regulation of apoptotic signaling pathway	biological_process	4	301	150	19765	ENSRNOG00000008022(Apaf1),ENSRNOG00000020482(Nfatc4),ENSRNOG00000020377(Cideb),ENSRNOG00000002255(Fam162a),	1.75105	0.170397	1
GO:0030098	lymphocyte differentiation	biological_process	7	301	263	19765	ENSRNOG00000026762(RT1-DOa),ENSRNOG00000025111(Nfkbid),ENSRNOG00000009184(Foxp1),ENSRNOG00000049137(Zfp35),ENSRNOG00000025222(Pcid2),ENSRNOG00000013166(Wnt4),ENSRNOG00000017181(Malt1),	1.74772	0.107448	1
GO:0005524	ATP binding	molecular_function	36	301	1353	19765	ENSRNOG00000014935(Peo1),ENSRNOG00000007203(Psmc6),ENSRNOG00000016655(Pex6),ENSRNOG00000038720(Cdkl1),ENSRNOG00000014628(Pomk),ENSRNOG00000007744(Ehd3),ENSRNOG00000001161(Gatc),ENSRNOG00000000457(Tap1),ENSRNOG00000019208(P2rx5),ENSRNOG00000016448(Eef2k),ENSRNOG00000009783(Camk2g),ENSRNOG00000027787(Cdc6),ENSRNOG00000021719(Slfn5),ENSRNOG00000046276(Myh3),ENSRNOG00000007102(Acss1),ENSRNOG000000169…	1.74717	0.00160162	0.249562
GO:0030217	T cell differentiation	biological_process	5	301	188	19765	ENSRNOG00000026762(RT1-DOa),ENSRNOG00000049137(Zfp35),ENSRNOG00000009184(Foxp1),ENSRNOG00000013166(Wnt4),ENSRNOG00000025111(Nfkbid),	1.74639	0.147258	1
GO:0060541	respiratory system development	biological_process	6	301	226	19765	ENSRNOG00000004276(Itga3),ENSRNOG00000000417(Numa1),ENSRNOG00000009348(Nos3),ENSRNOG00000031916(Timeless),ENSRNOG00000009184(Foxp1),ENSRNOG00000017383(l7Rn6),	1.7433	0.126917	1
GO:0050808	synapse organization	biological_process	5	301	189	19765	ENSRNOG00000016448(Eef2k),ENSRNOG00000026466(Lrrtm3),ENSRNOG00000010649(Ctnnd2),ENSRNOG00000015602(Cdh2),ENSRNOG00000020482(Nfatc4),	1.73715	0.150105	1
GO:0005261	cation channel activity	molecular_function	7	301	265	19765	ENSRNOG00000059765(Asic1),ENSRNOG00000006639(Scn9a),ENSRNOG00000013610(Chrna5),ENSRNOG00000020444(Hcn3),ENSRNOG00000001427(Orai2),ENSRNOG00000057221(Scn3b),ENSRNOG00000015746(Kcng4),	1.73453	0.111205	1
GO:0010638	positive regulation of organelle organization	biological_process	12	301	455	19765	ENSRNOG00000019318(Syt3),ENSRNOG00000028946(Cdc42ep4),ENSRNOG00000025406(Iqgap2),ENSRNOG00000021555(Mis18a),ENSRNOG00000010999(Cep295),ENSRNOG00000031162(Ccl24),ENSRNOG00000039859(Dnmt1),ENSRNOG00000002255(Fam162a),ENSRNOG00000020377(Cideb),ENSRNOG00000030118(Msn),ENSRNOG00000009571(Wipf3),ENSRNOG00000013166(Wnt4),	1.73181	0.0530774	1
GO:0003713	transcription coactivator activity	molecular_function	5	301	191	19765	ENSRNOG00000015734(Ube3a),ENSRNOG00000008065(Wwc1),ENSRNOG00000005616(Ncoa3),ENSRNOG00000021614(Kmt2e),ENSRNOG00000004300(Gtf2a1),	1.71896	0.155891	1
GO:0005789	endoplasmic reticulum membrane	cellular_component	14	301	535	19765	ENSRNOG00000000230(Lmf1),ENSRNOG00000001285(Atp2a2),ENSRNOG00000036866(Acer3),ENSRNOG00000053269(Tmem106c),ENSRNOG00000006462(Ero1l),ENSRNOG00000050828(Vkorc1),ENSRNOG00000048606(Vma21),ENSRNOG00000004585(Tmtc2),ENSRNOG00000008619(Agtrap),ENSRNOG00000014628(Pomk),ENSRNOG00000057934(Tmx1),ENSRNOG00000009783(Camk2g),ENSRNOG00000000457(Tap1),ENSRNOG00000027434(Fitm2),	1.71832	0.0420652	1
GO:0019058	viral life cycle	biological_process	4	301	153	19765	ENSRNOG00000024194(Rsf1),ENSRNOG00000000841(Ddx39b),ENSRNOG00000001187(Oasl),ENSRNOG00000000457(Tap1),	1.71672	0.181271	1
GO:0007611	learning or memory	biological_process	6	301	230	19765	ENSRNOG00000010649(Ctnnd2),ENSRNOG00000004276(Itga3),ENSRNOG00000004730(Meis2),ENSRNOG00000014628(Pomk),ENSRNOG00000009826(Bche),ENSRNOG00000059765(Asic1),	1.71299	0.136281	1
GO:0051650	establishment of vesicle localization	biological_process	4	301	154	19765	ENSRNOG00000019318(Syt3),ENSRNOG00000003971(Gosr1),ENSRNOG00000018009(Rab8b),ENSRNOG00000001285(Atp2a2),	1.70557	0.184974	1
GO:0006520	cellular amino acid metabolic process	biological_process	7	301	271	19765	ENSRNOG00000005193(Pfas),ENSRNOG00000055408(Gcat),ENSRNOG00000006462(Ero1l),ENSRNOG00000009348(Nos3),ENSRNOG00000054724(Pycrl),ENSRNOG00000020658(Aarsd1),ENSRNOG00000039859(Dnmt1),	1.69613	0.122972	1
GO:0000166	nucleotide binding	molecular_function	57	301	2213	19765	ENSRNOG00000018714(Arl5b),ENSRNOG00000012818(Ksr1),ENSRNOG00000052968(Hnrnpa3),ENSRNOG00000008022(Apaf1),ENSRNOG00000028913(LOC688970),ENSRNOG00000014049(Riok1),ENSRNOG00000049695(Myh1),ENSRNOG00000006523(Atl2),ENSRNOG00000013110(Nudt2),ENSRNOG00000001187(Oasl),ENSRNOG00000020444(Hcn3),ENSRNOG00000000841(Ddx39b),ENSRNOG00000000633(Rhobtb1),ENSRNOG00000033101(Myo18a),ENSRNOG00000038720(Cdkl1),ENSR…	1.69131	0.000206981	0.0788367
GO:0005912	adherens junction	cellular_component	10	301	389	19765	ENSRNOG00000036745(Gna13),ENSRNOG00000030118(Msn),ENSRNOG00000004276(Itga3),ENSRNOG00000007744(Ehd3),ENSRNOG00000015602(Cdh2),ENSRNOG00000011228(Layn),ENSRNOG00000048932(Smagp),ENSRNOG00000025757(Myh6),ENSRNOG00000016983(Myh7),ENSRNOG00000059801(Lima1),	1.68803	0.0827722	1
GO:0042278	purine nucleoside metabolic process	biological_process	7	301	273	19765	ENSRNOG00000011820(Acpp),ENSRNOG00000039859(Dnmt1),ENSRNOG00000046276(Myh3),ENSRNOG00000011071(Nt5e),ENSRNOG00000052506(Ak3),ENSRNOG00000025757(Myh6),ENSRNOG00000016983(Myh7),	1.6837	0.12706	1
GO:0031647	regulation of protein stability	biological_process	4	301	157	19765	ENSRNOG00000019629(Lamp1),ENSRNOG00000016133(Sumo1),ENSRNOG00000016655(Pex6),ENSRNOG00000010967(Cdc37l1),	1.67298	0.196312	1
GO:0007265	Ras protein signal transduction	biological_process	8	301	315	19765	ENSRNOG00000015602(Cdh2),ENSRNOG00000004276(Itga3),ENSRNOG00000018009(Rab8b),ENSRNOG00000018901(Rab14),ENSRNOG00000014083(Iqsec3),ENSRNOG00000036745(Gna13),ENSRNOG00000028946(Cdc42ep4),ENSRNOG00000032703(Rasgrp3),	1.66767	0.115859	1
GO:0050662	coenzyme binding	molecular_function	5	301	197	19765	ENSRNOG00000003622(Cybb),ENSRNOG00000019630(Hacl1),ENSRNOG00000005749(Foxred2),ENSRNOG00000009348(Nos3),ENSRNOG00000012436(Adh6),	1.66661	0.173992	1
GO:1901342	regulation of vasculature development	biological_process	5	301	197	19765	ENSRNOG00000013166(Wnt4),ENSRNOG00000004158(Hdac9),ENSRNOG00000009348(Nos3),ENSRNOG00000049115(Ccr5),ENSRNOG00000031162(Ccl24),	1.66661	0.173992	1
GO:0042175	nuclear outer membrane-endoplasmic reticulum membrane network	cellular_component	14	301	552	19765	ENSRNOG00000027434(Fitm2),ENSRNOG00000009783(Camk2g),ENSRNOG00000000457(Tap1),ENSRNOG00000014628(Pomk),ENSRNOG00000008619(Agtrap),ENSRNOG00000004585(Tmtc2),ENSRNOG00000057934(Tmx1),ENSRNOG00000048606(Vma21),ENSRNOG00000050828(Vkorc1),ENSRNOG00000006462(Ero1l),ENSRNOG00000036866(Acer3),ENSRNOG00000001285(Atp2a2),ENSRNOG00000053269(Tmem106c),ENSRNOG00000000230(Lmf1),	1.6654	0.053122	1
GO:0051090	regulation of sequence-specific DNA binding transcription factor activity	biological_process	7	301	276	19765	ENSRNOG00000017181(Malt1),ENSRNOG00000025111(Nfkbid),ENSRNOG00000011975(Crtc3),ENSRNOG00000054385(Rhebl1),ENSRNOG00000025423(Map3k13),ENSRNOG00000001189(Sik1),ENSRNOG00000016133(Sumo1),	1.6654	0.13335	1
GO:0005096	GTPase activator activity	molecular_function	4	301	158	19765	ENSRNOG00000018144(Depdc5),ENSRNOG00000032703(Rasgrp3),ENSRNOG00000028946(Cdc42ep4),ENSRNOG00000025406(Iqgap2),	1.66239	0.200168	1
GO:0036094	small molecule binding	molecular_function	63	301	2493	19765	ENSRNOG00000001050(Eif2ak1),ENSRNOG00000000956(Rasl11a),ENSRNOG00000021719(Slfn5),ENSRNOG00000046276(Myh3),ENSRNOG00000019208(P2rx5),ENSRNOG00000000457(Tap1),ENSRNOG00000016448(Eef2k),ENSRNOG00000007744(Ehd3),ENSRNOG00000025895(Sdpr),ENSRNOG00000038720(Cdkl1),ENSRNOG00000003622(Cybb),ENSRNOG00000011071(Nt5e),ENSRNOG00000019318(Syt3),ENSRNOG00000007203(Psmc6),ENSRNOG00000039859(Dnmt1),ENSRNOG00000…	1.65939	0.000167191	0.081876
GO:0030016	myofibril	cellular_component	4	301	160	19765	ENSRNOG00000014409(Myl7),ENSRNOG00000025757(Myh6),ENSRNOG00000016983(Myh7),ENSRNOG00000057221(Scn3b),	1.64161	0.207992	1
GO:0043168	anion binding	molecular_function	61	301	2441	19765	ENSRNOG00000019630(Hacl1),ENSRNOG00000016655(Pex6),ENSRNOG00000009348(Nos3),ENSRNOG00000012436(Adh6),ENSRNOG00000014935(Peo1),ENSRNOG00000016983(Myh7),ENSRNOG00000007102(Acss1),ENSRNOG00000055408(Gcat),ENSRNOG00000027787(Cdc6),ENSRNOG00000036745(Gna13),ENSRNOG00000009783(Camk2g),ENSRNOG00000001161(Gatc),ENSRNOG00000038365(Plekha2),ENSRNOG00000014628(Pomk),ENSRNOG00000011573(Csad),ENSRNOG000000543…	1.64094	0.000280236	0.080054
GO:0045177	apical part of cell	cellular_component	8	301	321	19765	ENSRNOG00000030118(Msn),ENSRNOG00000018901(Rab14),ENSRNOG00000005957(Slc4a7),ENSRNOG00000003261(Usp9x),ENSRNOG00000011820(Acpp),ENSRNOG00000015602(Cdh2),ENSRNOG00000002265(Casr),ENSRNOG00000000417(Numa1),	1.6365	0.126863	1
GO:0019216	regulation of lipid metabolic process	biological_process	6	301	242	19765	ENSRNOG00000000230(Lmf1),ENSRNOG00000011071(Nt5e),ENSRNOG00000001189(Sik1),ENSRNOG00000027434(Fitm2),ENSRNOG00000013166(Wnt4),ENSRNOG00000011975(Crtc3),	1.62804	0.16679	1
GO:0009306	protein secretion	biological_process	10	301	406	19765	ENSRNOG00000000230(Lmf1),ENSRNOG00000033101(Myo18a),ENSRNOG00000049115(Ccr5),ENSRNOG00000058940(Rab11fip1),ENSRNOG00000000394(Srgn),ENSRNOG00000018009(Rab8b),ENSRNOG00000019727(Dph3),ENSRNOG00000047620(Golph3l),ENSRNOG00000002265(Casr),ENSRNOG00000009184(Foxp1),	1.61735	0.105414	1
GO:0006461	protein complex assembly	biological_process	26	301	1060	19765	ENSRNOG00000031162(Ccl24),ENSRNOG00000015602(Cdh2),ENSRNOG00000030118(Msn),ENSRNOG00000016133(Sumo1),ENSRNOG00000049695(Myh1),ENSRNOG00000006523(Atl2),ENSRNOG00000010169(Atpaf1),ENSRNOG00000032224(Hist1h4b),ENSRNOG00000021555(Mis18a),ENSRNOG00000015746(Kcng4),ENSRNOG00000008022(Apaf1),ENSRNOG00000059765(Asic1),ENSRNOG00000027091(Kctd18),ENSRNOG00000048606(Vma21),ENSRNOG00000007744(Ehd3),ENSRNOG00…	1.61064	0.0177401	0.821799
GO:0005506	iron ion binding	molecular_function	5	301	204	19765	ENSRNOG00000024128(Aco2),ENSRNOG00000011071(Nt5e),ENSRNOG00000052061(Ppef2),ENSRNOG00000012264(Alkbh1),ENSRNOG00000009348(Nos3),	1.60942	0.196498	1
GO:0006914	autophagy	biological_process	8	301	327	19765	ENSRNOG00000032034(Supt5h),ENSRNOG00000002215(Mylk),ENSRNOG00000021213(Lix1l),ENSRNOG00000031544(Larp1),ENSRNOG00000012324(Soga3),ENSRNOG00000009749(Wdr45),ENSRNOG00000019629(Lamp1),ENSRNOG00000007124(Krcc1),	1.60647	0.138506	1
GO:0051091	positive regulation of sequence-specific DNA binding transcription factor activity	biological_process	4	301	165	19765	ENSRNOG00000011975(Crtc3),ENSRNOG00000054385(Rhebl1),ENSRNOG00000025423(Map3k13),ENSRNOG00000017181(Malt1),	1.59187	0.228199	1
GO:0098742	cell-cell adhesion via plasma-membrane adhesion molecules	biological_process	4	301	165	19765	ENSRNOG00000048932(Smagp),ENSRNOG00000016632(Dsg3),ENSRNOG00000015602(Cdh2),ENSRNOG00000026702(Amica1),	1.59187	0.228199	1
GO:0042391	regulation of membrane potential	biological_process	8	301	330	19765	ENSRNOG00000016133(Sumo1),ENSRNOG00000006639(Scn9a),ENSRNOG00000059765(Asic1),ENSRNOG00000057221(Scn3b),ENSRNOG00000007744(Ehd3),ENSRNOG00000001285(Atp2a2),ENSRNOG00000020444(Hcn3),ENSRNOG00000013610(Chrna5),	1.59187	0.14457	1
GO:0046873	metal ion transmembrane transporter activity	molecular_function	9	301	373	19765	ENSRNOG00000059765(Asic1),ENSRNOG00000006639(Scn9a),ENSRNOG00000001285(Atp2a2),ENSRNOG00000005957(Slc4a7),ENSRNOG00000020444(Hcn3),ENSRNOG00000045524(Slc39a3),ENSRNOG00000001427(Orai2),ENSRNOG00000015746(Kcng4),ENSRNOG00000057221(Scn3b),	1.5844	0.132045	1
GO:1901653	cellular response to peptide	biological_process	6	301	249	19765	ENSRNOG00000027787(Cdc6),ENSRNOG00000016448(Eef2k),ENSRNOG00000002011(Gnrhr),ENSRNOG00000002265(Casr),ENSRNOG00000004158(Hdac9),ENSRNOG00000018009(Rab8b),	1.58228	0.18625	1
GO:0072657	protein localization to membrane	biological_process	8	301	332	19765	ENSRNOG00000016133(Sumo1),ENSRNOG00000011321(Rftn1),ENSRNOG00000018009(Rab8b),ENSRNOG00000013166(Wnt4),ENSRNOG00000004276(Itga3),ENSRNOG00000007744(Ehd3),ENSRNOG00000015602(Cdh2),ENSRNOG00000057221(Scn3b),	1.58228	0.148702	1
GO:0007268	synaptic transmission	biological_process	12	301	500	19765	ENSRNOG00000059765(Asic1),ENSRNOG00000006639(Scn9a),ENSRNOG00000019318(Syt3),ENSRNOG00000010649(Ctnnd2),ENSRNOG00000001285(Atp2a2),ENSRNOG00000018009(Rab8b),ENSRNOG00000013171(Grm2),ENSRNOG00000013610(Chrna5),ENSRNOG00000009826(Bche),ENSRNOG00000009783(Camk2g),ENSRNOG00000038184(Camk2n2),ENSRNOG00000020482(Nfatc4),	1.57595	0.0978095	1
GO:1903531	negative regulation of secretion by cell	biological_process	4	301	167	19765	ENSRNOG00000000394(Srgn),ENSRNOG00000059765(Asic1),ENSRNOG00000058940(Rab11fip1),ENSRNOG00000019727(Dph3),	1.5728	0.236536	1
GO:0019899	enzyme binding	molecular_function	36	301	1503	19765	ENSRNOG00000019653(Csrnp2),ENSRNOG00000003457(Ccdc64b),ENSRNOG00000015602(Cdh2),ENSRNOG00000030118(Msn),ENSRNOG00000052061(Ppef2),ENSRNOG00000000934(Piwil1),ENSRNOG00000016133(Sumo1),ENSRNOG00000032034(Supt5h),ENSRNOG00000001189(Sik1),ENSRNOG00000004276(Itga3),ENSRNOG00000019220(Rhod),ENSRNOG00000001285(Atp2a2),ENSRNOG00000013336(Wdr70),ENSRNOG00000004345(Daam1),ENSRNOG00000012818(Ksr1),ENSRNOG00…	1.5728	0.00873225	0.586944
GO:0071103	DNA conformation change	biological_process	4	301	168	19765	ENSRNOG00000021555(Mis18a),ENSRNOG00000032224(Hist1h4b),ENSRNOG00000014935(Peo1),ENSRNOG00000024194(Rsf1),	1.56344	0.240757	1
GO:0004672	protein kinase activity	molecular_function	14	301	588	19765	ENSRNOG00000038720(Cdkl1),ENSRNOG00000025423(Map3k13),ENSRNOG00000012818(Ksr1),ENSRNOG00000002215(Mylk),ENSRNOG00000028913(LOC688970),ENSRNOG00000014049(Riok1),ENSRNOG00000001050(Eif2ak1),ENSRNOG00000001189(Sik1),ENSRNOG00000001453(Baz1b),ENSRNOG00000003063(Phka1),ENSRNOG00000009783(Camk2g),ENSRNOG00000021200(Hfe2),ENSRNOG00000016448(Eef2k),ENSRNOG00000014628(Pomk),	1.56344	0.0834298	1
GO:0001077	transcriptional activator activity, RNA polymerase II core promoter proximal region sequence-specific binding	molecular_function	5	301	210	19765	ENSRNOG00000005616(Ncoa3),ENSRNOG00000004730(Meis2),ENSRNOG00000007408(Ebf4),ENSRNOG00000009139(Fubp3),ENSRNOG00000054989(Grhl1),	1.56344	0.216953	1
GO:0007159	leukocyte cell-cell adhesion	biological_process	9	301	379	19765	ENSRNOG00000009184(Foxp1),ENSRNOG00000025111(Nfkbid),ENSRNOG00000049137(Zfp35),ENSRNOG00000011071(Nt5e),ENSRNOG00000026762(RT1-DOa),ENSRNOG00000026702(Amica1),ENSRNOG00000013166(Wnt4),ENSRNOG00000030118(Msn),ENSRNOG00000017181(Malt1),	1.55931	0.143073	1
GO:0005765	lysosomal membrane	cellular_component	4	301	169	19765	ENSRNOG00000018901(Rab14),ENSRNOG00000011820(Acpp),ENSRNOG00000019629(Lamp1),ENSRNOG00000018144(Depdc5),	1.55419	0.245014	1
GO:0005244	voltage-gated ion channel activity	molecular_function	4	301	169	19765	ENSRNOG00000057221(Scn3b),ENSRNOG00000015746(Kcng4),ENSRNOG00000006639(Scn9a),ENSRNOG00000020444(Hcn3),	1.55419	0.245014	1
GO:0043254	regulation of protein complex assembly	biological_process	7	301	297	19765	ENSRNOG00000031162(Ccl24),ENSRNOG00000030118(Msn),ENSRNOG00000009571(Wipf3),ENSRNOG00000007203(Psmc6),ENSRNOG00000028946(Cdc42ep4),ENSRNOG00000025406(Iqgap2),ENSRNOG00000016133(Sumo1),	1.54765	0.182663	1
GO:0008134	transcription factor binding	molecular_function	11	301	467	19765	ENSRNOG00000025111(Nfkbid),ENSRNOG00000011975(Crtc3),ENSRNOG00000001189(Sik1),ENSRNOG00000016133(Sumo1),ENSRNOG00000004300(Gtf2a1),ENSRNOG00000004158(Hdac9),ENSRNOG00000007203(Psmc6),ENSRNOG00000007408(Ebf4),ENSRNOG00000039859(Dnmt1),ENSRNOG00000020482(Nfatc4),ENSRNOG00000004730(Meis2),	1.5467	0.121451	1
GO:0050890	cognition	biological_process	6	301	255	19765	ENSRNOG00000009826(Bche),ENSRNOG00000059765(Asic1),ENSRNOG00000010649(Ctnnd2),ENSRNOG00000004276(Itga3),ENSRNOG00000004730(Meis2),ENSRNOG00000014628(Pomk),	1.54505	0.203892	1
GO:0043209	myelin sheath	cellular_component	4	301	170	19765	ENSRNOG00000024128(Aco2),ENSRNOG00000018700(Mobp),ENSRNOG00000007744(Ehd3),ENSRNOG00000030118(Msn),	1.54505	0.249305	1
GO:0005085	guanyl-nucleotide exchange factor activity	molecular_function	4	301	170	19765	ENSRNOG00000032703(Rasgrp3),ENSRNOG00000014083(Iqsec3),ENSRNOG00000010794(Dennd3),ENSRNOG00000026748(Dennd2a),	1.54505	0.249305	1
GO:0070588	calcium ion transmembrane transport	biological_process	5	301	214	19765	ENSRNOG00000016133(Sumo1),ENSRNOG00000006462(Ero1l),ENSRNOG00000001427(Orai2),ENSRNOG00000059765(Asic1),ENSRNOG00000001285(Atp2a2),	1.53422	0.231172	1
GO:0001228	transcriptional activator activity, RNA polymerase II transcription regulatory region sequence-specific binding	molecular_function	7	301	300	19765	ENSRNOG00000005616(Ncoa3),ENSRNOG00000009139(Fubp3),ENSRNOG00000007408(Ebf4),ENSRNOG00000004730(Meis2),ENSRNOG00000002593(Esrrg),ENSRNOG00000019653(Csrnp2),ENSRNOG00000054989(Grhl1),	1.53217	0.19046	1
GO:0009116	nucleoside metabolic process	biological_process	7	301	301	19765	ENSRNOG00000052506(Ak3),ENSRNOG00000025757(Myh6),ENSRNOG00000016983(Myh7),ENSRNOG00000046276(Myh3),ENSRNOG00000011071(Nt5e),ENSRNOG00000011820(Acpp),ENSRNOG00000039859(Dnmt1),	1.52708	0.193101	1
GO:0010038	response to metal ion	biological_process	8	301	345	19765	ENSRNOG00000019830(Hsd17b1),ENSRNOG00000002265(Casr),ENSRNOG00000019318(Syt3),ENSRNOG00000011071(Nt5e),ENSRNOG00000016448(Eef2k),ENSRNOG00000009620(Cybrd1),ENSRNOG00000020482(Nfatc4),ENSRNOG00000039859(Dnmt1),	1.52265	0.177313	1
GO:0000982	transcription factor activity, RNA polymerase II core promoter proximal region sequence-specific binding	molecular_function	7	301	302	19765	ENSRNOG00000005616(Ncoa3),ENSRNOG00000009139(Fubp3),ENSRNOG00000004730(Meis2),ENSRNOG00000020482(Nfatc4),ENSRNOG00000007408(Ebf4),ENSRNOG00000027317(Ylpm1),ENSRNOG00000054989(Grhl1),	1.52202	0.195762	1
GO:0007281	germ cell development	biological_process	5	301	216	19765	ENSRNOG00000060320(Lin28a),ENSRNOG00000000934(Piwil1),ENSRNOG00000006965(Aff4),ENSRNOG00000014584(Odf2),ENSRNOG00000013166(Wnt4),	1.52001	0.238453	1
GO:0031253	cell projection membrane	cellular_component	5	301	217	19765	ENSRNOG00000007744(Ehd3),ENSRNOG00000004276(Itga3),ENSRNOG00000008065(Wwc1),ENSRNOG00000036745(Gna13),ENSRNOG00000009620(Cybrd1),	1.51301	0.242135	1
GO:0050714	positive regulation of protein secretion	biological_process	4	301	174	19765	ENSRNOG00000033101(Myo18a),ENSRNOG00000049115(Ccr5),ENSRNOG00000047620(Golph3l),ENSRNOG00000002265(Casr),	1.50953	0.266812	1
GO:0030001	metal ion transport	biological_process	16	301	697	19765	ENSRNOG00000005957(Slc4a7),ENSRNOG00000045524(Slc39a3),ENSRNOG00000009783(Camk2g),ENSRNOG00000020444(Hcn3),ENSRNOG00000006639(Scn9a),ENSRNOG00000001189(Sik1),ENSRNOG00000016133(Sumo1),ENSRNOG00000001285(Atp2a2),ENSRNOG00000009348(Nos3),ENSRNOG00000015746(Kcng4),ENSRNOG00000057221(Scn3b),ENSRNOG00000001427(Orai2),ENSRNOG00000002265(Casr),ENSRNOG00000059765(Asic1),ENSRNOG00000006462(Ero1l),ENSRNOG0…	1.50736	0.089432	1
GO:0048588	developmental cell growth	biological_process	4	301	175	19765	ENSRNOG00000019318(Syt3),ENSRNOG00000049115(Ccr5),ENSRNOG00000000841(Ddx39b),ENSRNOG00000003261(Usp9x),	1.5009	0.271273	1
GO:0030695	GTPase regulator activity	molecular_function	4	301	175	19765	ENSRNOG00000018144(Depdc5),ENSRNOG00000025406(Iqgap2),ENSRNOG00000028946(Cdc42ep4),ENSRNOG00000032703(Rasgrp3),	1.5009	0.271273	1
GO:0002521	leukocyte differentiation	biological_process	9	301	394	19765	ENSRNOG00000017181(Malt1),ENSRNOG00000013166(Wnt4),ENSRNOG00000025222(Pcid2),ENSRNOG00000049137(Zfp35),ENSRNOG00000001050(Eif2ak1),ENSRNOG00000009184(Foxp1),ENSRNOG00000025111(Nfkbid),ENSRNOG00000021614(Kmt2e),ENSRNOG00000026762(RT1-DOa),	1.49995	0.17311	1
GO:0019898	extrinsic component of membrane	cellular_component	5	301	219	19765	ENSRNOG00000015602(Cdh2),ENSRNOG00000030118(Msn),ENSRNOG00000047080(Gng4),ENSRNOG00000001285(Atp2a2),ENSRNOG00000036745(Gna13),	1.49919	0.249584	1
GO:0007059	chromosome segregation	biological_process	5	301	219	19765	ENSRNOG00000021555(Mis18a),ENSRNOG00000025222(Pcid2),ENSRNOG00000032929(Incenp),ENSRNOG00000027787(Cdc6),ENSRNOG00000024178(Cenpt),	1.49919	0.249584	1
GO:0046983	protein dimerization activity	molecular_function	24	301	1053	19765	ENSRNOG00000009250(Pts),ENSRNOG00000038999(RT1-A1),ENSRNOG00000004300(Gtf2a1),ENSRNOG00000032034(Supt5h),ENSRNOG00000048932(Smagp),ENSRNOG00000031916(Timeless),ENSRNOG00000032224(Hist1h4b),ENSRNOG00000004276(Itga3),ENSRNOG00000005616(Ncoa3),ENSRNOG00000009184(Foxp1),ENSRNOG00000025423(Map3k13),ENSRNOG00000007408(Ebf4),ENSRNOG00000001811(Fgfr1op2),ENSRNOG00000000457(Tap1),ENSRNOG00000009783(Camk2g…	1.49663	0.0479131	1
GO:0098588	bounding membrane of organelle	cellular_component	31	301	1363	19765	ENSRNOG00000016953(Chst4),ENSRNOG00000012037(Galnt7),ENSRNOG00000033101(Myo18a),ENSRNOG00000018009(Rab8b),ENSRNOG00000018901(Rab14),ENSRNOG00000018574(Qsox2),ENSRNOG00000047620(Golph3l),ENSRNOG00000048606(Vma21),ENSRNOG00000050828(Vkorc1),ENSRNOG00000000230(Lmf1),ENSRNOG00000000394(Srgn),ENSRNOG00000036866(Acer3),ENSRNOG00000001285(Atp2a2),ENSRNOG00000018144(Depdc5),ENSRNOG00000000417(Numa1),ENSR…	1.49347	0.0277182	1
GO:0051345	positive regulation of hydrolase activity	biological_process	13	301	574	19765	ENSRNOG00000008022(Apaf1),ENSRNOG00000032703(Rasgrp3),ENSRNOG00000025406(Iqgap2),ENSRNOG00000002265(Casr),ENSRNOG00000000230(Lmf1),ENSRNOG00000014083(Iqsec3),ENSRNOG00000013166(Wnt4),ENSRNOG00000002255(Fam162a),ENSRNOG00000020377(Cideb),ENSRNOG00000028946(Cdc42ep4),ENSRNOG00000016133(Sumo1),ENSRNOG00000031162(Ccl24),ENSRNOG00000036745(Gna13),	1.48717	0.127391	1
GO:0016337	single organismal cell-cell adhesion	biological_process	13	301	574	19765	ENSRNOG00000017181(Malt1),ENSRNOG00000013166(Wnt4),ENSRNOG00000049115(Ccr5),ENSRNOG00000009184(Foxp1),ENSRNOG00000011071(Nt5e),ENSRNOG00000026702(Amica1),ENSRNOG00000030118(Msn),ENSRNOG00000015602(Cdh2),ENSRNOG00000049137(Zfp35),ENSRNOG00000013674(Megf10),ENSRNOG00000025111(Nfkbid),ENSRNOG00000010649(Ctnnd2),ENSRNOG00000026762(RT1-DOa),	1.48717	0.127391	1
GO:0008168	methyltransferase activity	molecular_function	4	301	178	19765	ENSRNOG00000039859(Dnmt1),ENSRNOG00000036918(Mettl20),ENSRNOG00000021614(Kmt2e),ENSRNOG00000029064(Zcchc4),	1.47561	0.284851	1
GO:0002683	negative regulation of immune system process	biological_process	7	301	315	19765	ENSRNOG00000038999(RT1-A1),ENSRNOG00000004730(Meis2),ENSRNOG00000000457(Tap1),ENSRNOG00000026762(RT1-DOa),ENSRNOG00000032224(Hist1h4b),ENSRNOG00000049137(Zfp35),ENSRNOG00000025111(Nfkbid),	1.45921	0.232221	1
GO:0061136	regulation of proteasomal protein catabolic process	biological_process	4	301	181	19765	ENSRNOG00000016133(Sumo1),ENSRNOG00000025222(Pcid2),ENSRNOG00000007203(Psmc6),ENSRNOG00000003261(Usp9x),	1.45115	0.298718	1
GO:0043167	ion binding	molecular_function	115	301	5208	19765	ENSRNOG00000029064(Zcchc4),ENSRNOG00000020658(Aarsd1),ENSRNOG00000016683(Zfp668),ENSRNOG00000002509(Gnl3l),ENSRNOG00000002593(Esrrg),ENSRNOG00000015150(Spg7),ENSRNOG00000025423(Map3k13),ENSRNOG00000054385(Rhebl1),ENSRNOG00000009184(Foxp1),ENSRNOG00000027592(Rerg),ENSRNOG00000002215(Mylk),ENSRNOG00000017157(Trim69),ENSRNOG00000023312(Lonrf2),ENSRNOG00000007629(Sf3a3),ENSRNOG00000015602(Cdh2),ENSRN…	1.44996	0.000153629	0.13166
GO:0006259	DNA metabolic process	biological_process	15	301	680	19765	ENSRNOG00000009184(Foxp1),ENSRNOG00000021614(Kmt2e),ENSRNOG00000020751(Rdm1),ENSRNOG00000001134(Rfc5),ENSRNOG00000012264(Alkbh1),ENSRNOG00000008022(Apaf1),ENSRNOG00000027921(Rlf),ENSRNOG00000039859(Dnmt1),ENSRNOG00000014935(Peo1),ENSRNOG00000021555(Mis18a),ENSRNOG00000001453(Baz1b),ENSRNOG00000027787(Cdc6),ENSRNOG00000036699(RGD1306926),ENSRNOG00000027317(Ylpm1),ENSRNOG00000000841(Ddx39b),	1.44848	0.128581	1
GO:0048729	tissue morphogenesis	biological_process	13	301	590	19765	ENSRNOG00000005957(Slc4a7),ENSRNOG00000030118(Msn),ENSRNOG00000036745(Gna13),ENSRNOG00000020482(Nfatc4),ENSRNOG00000031916(Timeless),ENSRNOG00000016983(Myh7),ENSRNOG00000013166(Wnt4),ENSRNOG00000004276(Itga3),ENSRNOG00000025757(Myh6),ENSRNOG00000002265(Casr),ENSRNOG00000008022(Apaf1),ENSRNOG00000005616(Ncoa3),ENSRNOG00000002215(Mylk),	1.44684	0.150782	1
GO:0006790	sulfur compound metabolic process	biological_process	5	301	227	19765	ENSRNOG00000011820(Acpp),ENSRNOG00000011573(Csad),ENSRNOG00000039859(Dnmt1),ENSRNOG00000007102(Acss1),ENSRNOG00000016953(Chst4),	1.44635	0.280471	1
GO:0032535	regulation of cellular component size	biological_process	7	301	319	19765	ENSRNOG00000009571(Wipf3),ENSRNOG00000030118(Msn),ENSRNOG00000031162(Ccl24),ENSRNOG00000049115(Ccr5),ENSRNOG00000025406(Iqgap2),ENSRNOG00000059801(Lima1),ENSRNOG00000028946(Cdc42ep4),	1.44091	0.244124	1
GO:0060562	epithelial tube morphogenesis	biological_process	7	301	319	19765	ENSRNOG00000013166(Wnt4),ENSRNOG00000036745(Gna13),ENSRNOG00000020482(Nfatc4),ENSRNOG00000031916(Timeless),ENSRNOG00000002265(Casr),ENSRNOG00000008022(Apaf1),ENSRNOG00000005616(Ncoa3),	1.44091	0.244124	1
GO:0022607	cellular component assembly	biological_process	43	301	1961	19765	ENSRNOG00000006523(Atl2),ENSRNOG00000049695(Myh1),ENSRNOG00000011321(Rftn1),ENSRNOG00000016133(Sumo1),ENSRNOG00000021555(Mis18a),ENSRNOG00000032224(Hist1h4b),ENSRNOG00000010169(Atpaf1),ENSRNOG00000010999(Cep295),ENSRNOG00000000841(Ddx39b),ENSRNOG00000015602(Cdh2),ENSRNOG00000031162(Ccl24),ENSRNOG00000030118(Msn),ENSRNOG00000018901(Rab14),ENSRNOG00000008022(Apaf1),ENSRNOG00000002215(Mylk),ENSRNOG0…	1.43986	0.0192465	0.86812
GO:0045765	regulation of angiogenesis	biological_process	4	301	183	19765	ENSRNOG00000031162(Ccl24),ENSRNOG00000049115(Ccr5),ENSRNOG00000009348(Nos3),ENSRNOG00000004158(Hdac9),	1.43529	0.308117	1
GO:0001701	in utero embryonic development	biological_process	8	301	366	19765	ENSRNOG00000025757(Myh6),ENSRNOG00000009184(Foxp1),ENSRNOG00000005616(Ncoa3),ENSRNOG00000003261(Usp9x),ENSRNOG00000009348(Nos3),ENSRNOG00000036745(Gna13),ENSRNOG00000045524(Slc39a3),ENSRNOG00000003174(Tapt1),	1.43529	0.229913	1
GO:0050708	regulation of protein secretion	biological_process	7	301	321	19765	ENSRNOG00000058940(Rab11fip1),ENSRNOG00000000394(Srgn),ENSRNOG00000049115(Ccr5),ENSRNOG00000033101(Myo18a),ENSRNOG00000002265(Casr),ENSRNOG00000019727(Dph3),ENSRNOG00000047620(Golph3l),	1.43194	0.250194	1
GO:0098655	cation transmembrane transport	biological_process	14	301	645	19765	ENSRNOG00000059765(Asic1),ENSRNOG00000034161(Cox6b1),ENSRNOG00000006462(Ero1l),ENSRNOG00000013610(Chrna5),ENSRNOG00000001285(Atp2a2),ENSRNOG00000057221(Scn3b),ENSRNOG00000015746(Kcng4),ENSRNOG00000001427(Orai2),ENSRNOG00000006639(Scn9a),ENSRNOG00000016133(Sumo1),ENSRNOG00000045524(Slc39a3),ENSRNOG00000020444(Hcn3),ENSRNOG00000005957(Slc4a7),ENSRNOG00000019208(P2rx5),	1.42527	0.153648	1
GO:0071375	cellular response to peptide hormone stimulus	biological_process	5	301	231	19765	ENSRNOG00000002011(Gnrhr),ENSRNOG00000016448(Eef2k),ENSRNOG00000018009(Rab8b),ENSRNOG00000004158(Hdac9),ENSRNOG00000027787(Cdc6),	1.42131	0.296546	1
GO:0061061	muscle structure development	biological_process	11	301	510	19765	ENSRNOG00000001285(Atp2a2),ENSRNOG00000013166(Wnt4),ENSRNOG00000015602(Cdh2),ENSRNOG00000000841(Ddx39b),ENSRNOG00000020482(Nfatc4),ENSRNOG00000025757(Myh6),ENSRNOG00000009184(Foxp1),ENSRNOG00000016983(Myh7),ENSRNOG00000013674(Megf10),ENSRNOG00000001189(Sik1),ENSRNOG00000002215(Mylk),	1.41629	0.196885	1
GO:0005216	ion channel activity	molecular_function	8	301	371	19765	ENSRNOG00000059765(Asic1),ENSRNOG00000006639(Scn9a),ENSRNOG00000005491(Best3),ENSRNOG00000020444(Hcn3),ENSRNOG00000013610(Chrna5),ENSRNOG00000001427(Orai2),ENSRNOG00000015746(Kcng4),ENSRNOG00000057221(Scn3b),	1.41595	0.243576	1
GO:0016485	protein processing	biological_process	5	301	232	19765	ENSRNOG00000008022(Apaf1),ENSRNOG00000000394(Srgn),ENSRNOG00000021200(Hfe2),ENSRNOG00000020377(Cideb),ENSRNOG00000002255(Fam162a),	1.41518	0.300629	1
GO:0051130	positive regulation of cellular component organization	biological_process	21	301	975	19765	ENSRNOG00000004276(Itga3),ENSRNOG00000039859(Dnmt1),ENSRNOG00000019692(Metrn),ENSRNOG00000020377(Cideb),ENSRNOG00000002255(Fam162a),ENSRNOG00000007203(Psmc6),ENSRNOG00000013166(Wnt4),ENSRNOG00000019318(Syt3),ENSRNOG00000025406(Iqgap2),ENSRNOG00000026466(Lrrtm3),ENSRNOG00000031162(Ccl24),ENSRNOG00000015602(Cdh2),ENSRNOG00000010999(Cep295),ENSRNOG00000016448(Eef2k),ENSRNOG00000011859(Eif5a2),ENSRNO…	1.41431	0.10091	1
GO:0051046	regulation of secretion	biological_process	13	301	604	19765	ENSRNOG00000019727(Dph3),ENSRNOG00000018009(Rab8b),ENSRNOG00000058940(Rab11fip1),ENSRNOG00000033101(Myo18a),ENSRNOG00000059765(Asic1),ENSRNOG00000002265(Casr),ENSRNOG00000047620(Golph3l),ENSRNOG00000019318(Syt3),ENSRNOG00000013171(Grm2),ENSRNOG00000001285(Atp2a2),ENSRNOG00000000394(Srgn),ENSRNOG00000049115(Ccr5),ENSRNOG00000019629(Lamp1),	1.41331	0.173399	1
GO:0042176	regulation of protein catabolic process	biological_process	7	301	327	19765	ENSRNOG00000015734(Ube3a),ENSRNOG00000030118(Msn),ENSRNOG00000025222(Pcid2),ENSRNOG00000007203(Psmc6),ENSRNOG00000003261(Usp9x),ENSRNOG00000001719(Psmd2),ENSRNOG00000016133(Sumo1),	1.40566	0.268868	1
GO:0010631	epithelial cell migration	biological_process	4	301	188	19765	ENSRNOG00000004276(Itga3),ENSRNOG00000049115(Ccr5),ENSRNOG00000009348(Nos3),ENSRNOG00000004158(Hdac9),	1.39712	0.332138	1
GO:0098609	cell-cell adhesion	biological_process	15	301	705	19765	ENSRNOG00000011071(Nt5e),ENSRNOG00000026702(Amica1),ENSRNOG00000009184(Foxp1),ENSRNOG00000016632(Dsg3),ENSRNOG00000049115(Ccr5),ENSRNOG00000013166(Wnt4),ENSRNOG00000017181(Malt1),ENSRNOG00000026762(RT1-DOa),ENSRNOG00000010649(Ctnnd2),ENSRNOG00000013674(Megf10),ENSRNOG00000025111(Nfkbid),ENSRNOG00000048932(Smagp),ENSRNOG00000049137(Zfp35),ENSRNOG00000015602(Cdh2),ENSRNOG00000030118(Msn),	1.39712	0.163021	1
GO:0051146	striated muscle cell differentiation	biological_process	5	301	235	19765	ENSRNOG00000025757(Myh6),ENSRNOG00000009184(Foxp1),ENSRNOG00000001189(Sik1),ENSRNOG00000015602(Cdh2),ENSRNOG00000000841(Ddx39b),	1.39712	0.313026	1
GO:0016236	macroautophagy	biological_process	5	301	236	19765	ENSRNOG00000032034(Supt5h),ENSRNOG00000002215(Mylk),ENSRNOG00000021213(Lix1l),ENSRNOG00000031544(Larp1),ENSRNOG00000007124(Krcc1),	1.3912	0.317208	1
GO:0001664	G-protein coupled receptor binding	molecular_function	5	301	236	19765	ENSRNOG00000036745(Gna13),ENSRNOG00000001285(Atp2a2),ENSRNOG00000013166(Wnt4),ENSRNOG00000031162(Ccl24),ENSRNOG00000049115(Ccr5),	1.3912	0.317208	1
GO:0008610	lipid biosynthetic process	biological_process	9	301	425	19765	ENSRNOG00000007102(Acss1),ENSRNOG00000011071(Nt5e),ENSRNOG00000001189(Sik1),ENSRNOG00000027434(Fitm2),ENSRNOG00000019830(Hsd17b1),ENSRNOG00000022268(Pnpla3),ENSRNOG00000003063(Phka1),ENSRNOG00000013166(Wnt4),ENSRNOG00000036866(Acer3),	1.39054	0.246333	1
GO:0048514	blood vessel morphogenesis	biological_process	9	301	425	19765	ENSRNOG00000002215(Mylk),ENSRNOG00000049115(Ccr5),ENSRNOG00000020482(Nfatc4),ENSRNOG00000015602(Cdh2),ENSRNOG00000031162(Ccl24),ENSRNOG00000009348(Nos3),ENSRNOG00000036745(Gna13),ENSRNOG00000013166(Wnt4),ENSRNOG00000004158(Hdac9),	1.39054	0.246333	1
GO:0051924	regulation of calcium ion transport	biological_process	4	301	189	19765	ENSRNOG00000009348(Nos3),ENSRNOG00000002265(Casr),ENSRNOG00000002215(Mylk),ENSRNOG00000016133(Sumo1),	1.38972	0.337029	1
GO:0060076	excitatory synapse	cellular_component	4	301	189	19765	ENSRNOG00000010649(Ctnnd2),ENSRNOG00000004276(Itga3),ENSRNOG00000009783(Camk2g),ENSRNOG00000016448(Eef2k),	1.38972	0.337029	1
GO:0006486	protein glycosylation	biological_process	4	301	189	19765	ENSRNOG00000005234(Gxylt1),ENSRNOG00000000230(Lmf1),ENSRNOG00000012037(Galnt7),ENSRNOG00000014628(Pomk),	1.38972	0.337029	1
GO:0048471	perinuclear region of cytoplasm	cellular_component	11	301	521	19765	ENSRNOG00000030118(Msn),ENSRNOG00000018009(Rab8b),ENSRNOG00000007744(Ehd3),ENSRNOG00000018144(Depdc5),ENSRNOG00000018700(Mobp),ENSRNOG00000020377(Cideb),ENSRNOG00000001285(Atp2a2),ENSRNOG00000004276(Itga3),ENSRNOG00000019629(Lamp1),ENSRNOG00000008065(Wwc1),ENSRNOG00000032703(Rasgrp3),	1.38639	0.219889	1
GO:0006812	cation transport	biological_process	20	301	948	19765	ENSRNOG00000006462(Ero1l),ENSRNOG00000002215(Mylk),ENSRNOG00000059765(Asic1),ENSRNOG00000002265(Casr),ENSRNOG00000034161(Cox6b1),ENSRNOG00000057221(Scn3b),ENSRNOG00000015746(Kcng4),ENSRNOG00000001427(Orai2),ENSRNOG00000001285(Atp2a2),ENSRNOG00000013610(Chrna5),ENSRNOG00000009348(Nos3),ENSRNOG00000001189(Sik1),ENSRNOG00000016133(Sumo1),ENSRNOG00000015741(Slc2a13),ENSRNOG00000006639(Scn9a),ENSRNOG0…	1.38533	0.127148	1
GO:0015672	monovalent inorganic cation transport	biological_process	11	301	522	19765	ENSRNOG00000059765(Asic1),ENSRNOG00000034161(Cox6b1),ENSRNOG00000057221(Scn3b),ENSRNOG00000015746(Kcng4),ENSRNOG00000009348(Nos3),ENSRNOG00000001189(Sik1),ENSRNOG00000016133(Sumo1),ENSRNOG00000015741(Slc2a13),ENSRNOG00000006639(Scn9a),ENSRNOG00000005957(Slc4a7),ENSRNOG00000020444(Hcn3),	1.38373	0.222055	1
GO:0090132	epithelium migration	biological_process	4	301	190	19765	ENSRNOG00000049115(Ccr5),ENSRNOG00000004276(Itga3),ENSRNOG00000004158(Hdac9),ENSRNOG00000009348(Nos3),	1.38241	0.341948	1
GO:0051048	negative regulation of secretion	biological_process	4	301	190	19765	ENSRNOG00000058940(Rab11fip1),ENSRNOG00000059765(Asic1),ENSRNOG00000000394(Srgn),ENSRNOG00000019727(Dph3),	1.38241	0.341948	1
GO:0016788	hydrolase activity, acting on ester bonds	molecular_function	14	301	665	19765	ENSRNOG00000052061(Ppef2),ENSRNOG00000022268(Pnpla3),ENSRNOG00000009826(Bche),ENSRNOG00000005711(Ptprd),ENSRNOG00000025360(Exd1),ENSRNOG00000001073(RGD1563482),ENSRNOG00000017600(Ptpn9),ENSRNOG00000039829(Rpp14),ENSRNOG00000042289(Plcxd2),ENSRNOG00000011071(Nt5e),ENSRNOG00000018326(Pgls),ENSRNOG00000012264(Alkbh1),ENSRNOG00000020658(Aarsd1),ENSRNOG00000011820(Acpp),	1.38241	0.185391	1
GO:0008324	cation transmembrane transporter activity	molecular_function	12	301	571	19765	ENSRNOG00000005957(Slc4a7),ENSRNOG00000045524(Slc39a3),ENSRNOG00000020444(Hcn3),ENSRNOG00000015741(Slc2a13),ENSRNOG00000006639(Scn9a),ENSRNOG00000001285(Atp2a2),ENSRNOG00000013610(Chrna5),ENSRNOG00000057221(Scn3b),ENSRNOG00000015746(Kcng4),ENSRNOG00000001427(Orai2),ENSRNOG00000059765(Asic1),ENSRNOG00000034161(Cox6b1),	1.37999	0.211695	1
GO:0000287	magnesium ion binding	molecular_function	4	301	191	19765	ENSRNOG00000001189(Sik1),ENSRNOG00000019630(Hacl1),ENSRNOG00000002265(Casr),ENSRNOG00000056011(AC139950.1),	1.37517	0.346895	1
GO:0044708	single-organism behavior	biological_process	9	301	430	19765	ENSRNOG00000013610(Chrna5),ENSRNOG00000012436(Adh6),ENSRNOG00000009826(Bche),ENSRNOG00000004730(Meis2),ENSRNOG00000014628(Pomk),ENSRNOG00000004276(Itga3),ENSRNOG00000006639(Scn9a),ENSRNOG00000059765(Asic1),ENSRNOG00000010649(Ctnnd2),	1.37437	0.259522	1
GO:0009101	glycoprotein biosynthetic process	biological_process	5	301	239	19765	ENSRNOG00000000230(Lmf1),ENSRNOG00000012037(Galnt7),ENSRNOG00000004019(Phlda1),ENSRNOG00000014628(Pomk),ENSRNOG00000005234(Gxylt1),	1.37373	0.329896	1
GO:0048638	regulation of developmental growth	biological_process	6	301	287	19765	ENSRNOG00000009184(Foxp1),ENSRNOG00000025757(Myh6),ENSRNOG00000019318(Syt3),ENSRNOG00000000841(Ddx39b),ENSRNOG00000008065(Wwc1),ENSRNOG00000049115(Ccr5),	1.37278	0.312228	1
GO:0031346	positive regulation of cell projection organization	biological_process	6	301	287	19765	ENSRNOG00000016448(Eef2k),ENSRNOG00000018009(Rab8b),ENSRNOG00000004276(Itga3),ENSRNOG00000019692(Metrn),ENSRNOG00000019318(Syt3),ENSRNOG00000028946(Cdc42ep4),	1.37278	0.312228	1
GO:0043161	proteasome-mediated ubiquitin-dependent protein catabolic process	biological_process	7	301	335	19765	ENSRNOG00000005749(Foxred2),ENSRNOG00000025222(Pcid2),ENSRNOG00000007203(Psmc6),ENSRNOG00000003261(Usp9x),ENSRNOG00000011663(Rnf7),ENSRNOG00000001719(Psmd2),ENSRNOG00000016133(Sumo1),	1.37209	0.29483	1
GO:0009636	response to toxic substance	biological_process	4	301	192	19765	ENSRNOG00000050828(Vkorc1),ENSRNOG00000006639(Scn9a),ENSRNOG00000009348(Nos3),ENSRNOG00000039859(Dnmt1),	1.36801	0.351869	1
GO:0051186	cofactor metabolic process	biological_process	6	301	289	19765	ENSRNOG00000039859(Dnmt1),ENSRNOG00000009250(Pts),ENSRNOG00000050828(Vkorc1),ENSRNOG00000001050(Eif2ak1),ENSRNOG00000007102(Acss1),ENSRNOG00000018326(Pgls),	1.36328	0.319745	1
GO:0033043	regulation of organelle organization	biological_process	18	301	867	19765	ENSRNOG00000028946(Cdc42ep4),ENSRNOG00000059801(Lima1),ENSRNOG00000027787(Cdc6),ENSRNOG00000021555(Mis18a),ENSRNOG00000010999(Cep295),ENSRNOG00000031162(Ccl24),ENSRNOG00000027317(Ylpm1),ENSRNOG00000030118(Msn),ENSRNOG00000025222(Pcid2),ENSRNOG00000009571(Wipf3),ENSRNOG00000025406(Iqgap2),ENSRNOG00000019318(Syt3),ENSRNOG00000014584(Odf2),ENSRNOG00000039859(Dnmt1),ENSRNOG00000019220(Rhod),ENSRNOG00…	1.36328	0.160887	1
GO:0022890	inorganic cation transmembrane transporter activity	molecular_function	10	301	482	19765	ENSRNOG00000006639(Scn9a),ENSRNOG00000034161(Cox6b1),ENSRNOG00000059765(Asic1),ENSRNOG00000045524(Slc39a3),ENSRNOG00000020444(Hcn3),ENSRNOG00000005957(Slc4a7),ENSRNOG00000001285(Atp2a2),ENSRNOG00000015746(Kcng4),ENSRNOG00000057221(Scn3b),ENSRNOG00000001427(Orai2),	1.36233	0.254591	1
GO:0045862	positive regulation of proteolysis	biological_process	5	301	242	19765	ENSRNOG00000016133(Sumo1),ENSRNOG00000008022(Apaf1),ENSRNOG00000020377(Cideb),ENSRNOG00000002255(Fam162a),ENSRNOG00000007203(Psmc6),	1.3567	0.342796	1
GO:0043169	cation binding	molecular_function	68	301	3293	19765	ENSRNOG00000056011(AC139950.1),ENSRNOG00000042201(Efcab2),ENSRNOG00000006925(Zfp786),ENSRNOG00000021614(Kmt2e),ENSRNOG00000002265(Casr),ENSRNOG00000012264(Alkbh1),ENSRNOG00000015229(Zc3h4),ENSRNOG00000009620(Cybrd1),ENSRNOG00000009250(Pts),ENSRNOG00000024128(Aco2),ENSRNOG00000019044(Adam30),ENSRNOG00000012037(Galnt7),ENSRNOG00000008865(Stac),ENSRNOG00000052061(Ppef2),ENSRNOG00000014409(Myl7),ENSR…	1.35596	0.014147	0.757749
GO:0070482	response to oxygen levels	biological_process	7	301	339	19765	ENSRNOG00000016448(Eef2k),ENSRNOG00000009783(Camk2g),ENSRNOG00000002255(Fam162a),ENSRNOG00000008619(Agtrap),ENSRNOG00000002265(Casr),ENSRNOG00000006462(Ero1l),ENSRNOG00000008022(Apaf1),	1.3559	0.308253	1
GO:0070848	response to growth factor	biological_process	11	301	533	19765	ENSRNOG00000018901(Rab14),ENSRNOG00000021200(Hfe2),ENSRNOG00000003261(Usp9x),ENSRNOG00000016448(Eef2k),ENSRNOG00000004730(Meis2),ENSRNOG00000013166(Wnt4),ENSRNOG00000039859(Dnmt1),ENSRNOG00000004276(Itga3),ENSRNOG00000025757(Myh6),ENSRNOG00000002265(Casr),ENSRNOG00000008022(Apaf1),	1.35518	0.246692	1
GO:0045087	innate immune response	biological_process	8	301	389	19765	ENSRNOG00000048932(Smagp),ENSRNOG00000011321(Rftn1),ENSRNOG00000017181(Malt1),ENSRNOG00000001187(Oasl),ENSRNOG00000000457(Tap1),ENSRNOG00000019629(Lamp1),ENSRNOG00000038999(RT1-A1),ENSRNOG00000031162(Ccl24),	1.35043	0.296255	1
GO:0008015	blood circulation	biological_process	8	301	389	19765	ENSRNOG00000001285(Atp2a2),ENSRNOG00000009348(Nos3),ENSRNOG00000057221(Scn3b),ENSRNOG00000008619(Agtrap),ENSRNOG00000016983(Myh7),ENSRNOG00000025757(Myh6),ENSRNOG00000002265(Casr),ENSRNOG00000016133(Sumo1),	1.35043	0.296255	1
GO:0060070	canonical Wnt signaling pathway	biological_process	4	301	195	19765	ENSRNOG00000010649(Ctnnd2),ENSRNOG00000015602(Cdh2),ENSRNOG00000025757(Myh6),ENSRNOG00000013166(Wnt4),	1.34696	0.366952	1
GO:0044822	poly(A) RNA binding	molecular_function	22	301	1073	19765	ENSRNOG00000028946(Cdc42ep4),ENSRNOG00000029115(RGD1564883),ENSRNOG00000027317(Ylpm1),ENSRNOG00000060320(Lin28a),ENSRNOG00000010572(Pus7),ENSRNOG00000032224(Hist1h4b),ENSRNOG00000031544(Larp1),ENSRNOG00000009139(Fubp3),ENSRNOG00000016133(Sumo1),ENSRNOG00000000934(Piwil1),ENSRNOG00000032034(Supt5h),ENSRNOG00000001187(Oasl),ENSRNOG00000015229(Zc3h4),ENSRNOG00000007629(Sf3a3),ENSRNOG00000033101(Myo1…	1.34634	0.143044	1
GO:0016324	apical plasma membrane	cellular_component	5	301	244	19765	ENSRNOG00000015602(Cdh2),ENSRNOG00000018901(Rab14),ENSRNOG00000005957(Slc4a7),ENSRNOG00000030118(Msn),ENSRNOG00000002265(Casr),	1.34558	0.35151	1
GO:0042802	identical protein binding	molecular_function	21	301	1025	19765	ENSRNOG00000009826(Bche),ENSRNOG00000009250(Pts),ENSRNOG00000048932(Smagp),ENSRNOG00000031916(Timeless),ENSRNOG00000003298(Cd247),ENSRNOG00000006523(Atl2),ENSRNOG00000025423(Map3k13),ENSRNOG00000009184(Foxp1),ENSRNOG00000004345(Daam1),ENSRNOG00000008022(Apaf1),ENSRNOG00000054724(Pycrl),ENSRNOG00000009783(Camk2g),ENSRNOG00000001811(Fgfr1op2),ENSRNOG00000001050(Eif2ak1),ENSRNOG00000016983(Myh7),ENS…	1.34532	0.151416	1
GO:0005938	cell cortex	cellular_component	4	301	196	19765	ENSRNOG00000009571(Wipf3),ENSRNOG00000000417(Numa1),ENSRNOG00000008619(Agtrap),ENSRNOG00000015602(Cdh2),	1.34009	0.372031	1
GO:0016791	phosphatase activity	molecular_function	5	301	245	19765	ENSRNOG00000005711(Ptprd),ENSRNOG00000017600(Ptpn9),ENSRNOG00000011820(Acpp),ENSRNOG00000052061(Ppef2),ENSRNOG00000011071(Nt5e),	1.34009	0.355901	1
GO:0072358	cardiovascular system development	biological_process	18	301	884	19765	ENSRNOG00000016983(Myh7),ENSRNOG00000001189(Sik1),ENSRNOG00000001453(Baz1b),ENSRNOG00000005957(Slc4a7),ENSRNOG00000004158(Hdac9),ENSRNOG00000036745(Gna13),ENSRNOG00000020482(Nfatc4),ENSRNOG00000031162(Ccl24),ENSRNOG00000015602(Cdh2),ENSRNOG00000000841(Ddx39b),ENSRNOG00000009184(Foxp1),ENSRNOG00000038720(Cdkl1),ENSRNOG00000025757(Myh6),ENSRNOG00000002215(Mylk),ENSRNOG00000013166(Wnt4),ENSRNOG00000…	1.33706	0.18435	1
GO:0072359	circulatory system development	biological_process	18	301	884	19765	ENSRNOG00000009348(Nos3),ENSRNOG00000013166(Wnt4),ENSRNOG00000004276(Itga3),ENSRNOG00000049115(Ccr5),ENSRNOG00000025757(Myh6),ENSRNOG00000038720(Cdkl1),ENSRNOG00000009184(Foxp1),ENSRNOG00000002215(Mylk),ENSRNOG00000036745(Gna13),ENSRNOG00000004158(Hdac9),ENSRNOG00000005957(Slc4a7),ENSRNOG00000015602(Cdh2),ENSRNOG00000000841(Ddx39b),ENSRNOG00000031162(Ccl24),ENSRNOG00000020482(Nfatc4),ENSRNOG00000…	1.33706	0.18435	1
GO:0042110	T cell activation	biological_process	7	301	344	19765	ENSRNOG00000009184(Foxp1),ENSRNOG00000025111(Nfkbid),ENSRNOG00000049137(Zfp35),ENSRNOG00000026762(RT1-DOa),ENSRNOG00000026702(Amica1),ENSRNOG00000013166(Wnt4),ENSRNOG00000017181(Malt1),	1.3362	0.325432	1
GO:0060537	muscle tissue development	biological_process	7	301	344	19765	ENSRNOG00000000841(Ddx39b),ENSRNOG00000009184(Foxp1),ENSRNOG00000013674(Megf10),ENSRNOG00000016983(Myh7),ENSRNOG00000025757(Myh6),ENSRNOG00000001189(Sik1),ENSRNOG00000002215(Mylk),	1.3362	0.325432	1
GO:0007517	muscle organ development	biological_process	6	301	295	19765	ENSRNOG00000002215(Mylk),ENSRNOG00000025757(Myh6),ENSRNOG00000016983(Myh7),ENSRNOG00000013674(Megf10),ENSRNOG00000009184(Foxp1),ENSRNOG00000000841(Ddx39b),	1.33555	0.342775	1
GO:0016787	hydrolase activity	molecular_function	47	301	2311	19765	ENSRNOG00000042289(Plcxd2),ENSRNOG00000017600(Ptpn9),ENSRNOG00000001073(RGD1563482),ENSRNOG00000012264(Alkbh1),ENSRNOG00000036866(Acer3),ENSRNOG00000019212(Tpp1),ENSRNOG00000033206(Entpd5),ENSRNOG00000013110(Nudt2),ENSRNOG00000006523(Atl2),ENSRNOG00000049695(Myh1),ENSRNOG00000052061(Ppef2),ENSRNOG00000022268(Pnpla3),ENSRNOG00000000841(Ddx39b),ENSRNOG00000019044(Adam30),ENSRNOG00000033101(Myo18a),…	1.33545	0.0480948	1
GO:0006996	organelle organization	biological_process	57	301	2805	19765	ENSRNOG00000039859(Dnmt1),ENSRNOG00000020377(Cideb),ENSRNOG00000025406(Iqgap2),ENSRNOG00000024178(Cenpt),ENSRNOG00000019318(Syt3),ENSRNOG00000053230(Fopnl),ENSRNOG00000027317(Ylpm1),ENSRNOG00000007744(Ehd3),ENSRNOG00000007887(Elk4),ENSRNOG00000004158(Hdac9),ENSRNOG00000025222(Pcid2),ENSRNOG00000001453(Baz1b),ENSRNOG00000024266(Haus5),ENSRNOG00000019212(Tpp1),ENSRNOG00000013166(Wnt4),ENSRNOG000000…	1.33436	0.0314199	1
GO:0002757	immune response-activating signal transduction	biological_process	4	301	197	19765	ENSRNOG00000011321(Rftn1),ENSRNOG00000003298(Cd247),ENSRNOG00000012965(Themis2),ENSRNOG00000017181(Malt1),	1.33329	0.377136	1
GO:0070085	glycosylation	biological_process	4	301	197	19765	ENSRNOG00000012037(Galnt7),ENSRNOG00000000230(Lmf1),ENSRNOG00000014628(Pomk),ENSRNOG00000005234(Gxylt1),	1.33329	0.377136	1
GO:0003712	transcription cofactor activity	molecular_function	7	301	345	19765	ENSRNOG00000015734(Ube3a),ENSRNOG00000004730(Meis2),ENSRNOG00000008065(Wwc1),ENSRNOG00000013166(Wnt4),ENSRNOG00000004300(Gtf2a1),ENSRNOG00000005616(Ncoa3),ENSRNOG00000021614(Kmt2e),	1.33232	0.32892	1
GO:0071593	lymphocyte aggregation	biological_process	7	301	346	19765	ENSRNOG00000013166(Wnt4),ENSRNOG00000017181(Malt1),ENSRNOG00000026702(Amica1),ENSRNOG00000026762(RT1-DOa),ENSRNOG00000025111(Nfkbid),ENSRNOG00000009184(Foxp1),ENSRNOG00000049137(Zfp35),	1.32847	0.332425	1
GO:0016773	phosphotransferase activity, alcohol group as acceptor	molecular_function	14	301	693	19765	ENSRNOG00000028913(LOC688970),ENSRNOG00000014049(Riok1),ENSRNOG00000012818(Ksr1),ENSRNOG00000002215(Mylk),ENSRNOG00000038720(Cdkl1),ENSRNOG00000025423(Map3k13),ENSRNOG00000014628(Pomk),ENSRNOG00000003063(Phka1),ENSRNOG00000021200(Hfe2),ENSRNOG00000009783(Camk2g),ENSRNOG00000016448(Eef2k),ENSRNOG00000001189(Sik1),ENSRNOG00000001453(Baz1b),ENSRNOG00000001050(Eif2ak1),	1.32655	0.236253	1
GO:0008092	cytoskeletal protein binding	molecular_function	14	301	693	19765	ENSRNOG00000009348(Nos3),ENSRNOG00000004345(Daam1),ENSRNOG00000028856(Pknox2),ENSRNOG00000025406(Iqgap2),ENSRNOG00000025757(Myh6),ENSRNOG00000033101(Myo18a),ENSRNOG00000030118(Msn),ENSRNOG00000009571(Wipf3),ENSRNOG00000018901(Rab14),ENSRNOG00000046276(Myh3),ENSRNOG00000000417(Numa1),ENSRNOG00000059801(Lima1),ENSRNOG00000049695(Myh1),ENSRNOG00000016983(Myh7),	1.32655	0.236253	1
GO:0006813	potassium ion transport	biological_process	4	301	198	19765	ENSRNOG00000009348(Nos3),ENSRNOG00000020444(Hcn3),ENSRNOG00000015746(Kcng4),ENSRNOG00000016133(Sumo1),	1.32655	0.382266	1
GO:0010628	positive regulation of gene expression	biological_process	30	301	1485	19765	ENSRNOG00000019653(Csrnp2),ENSRNOG00000020482(Nfatc4),ENSRNOG00000004730(Meis2),ENSRNOG00000000841(Ddx39b),ENSRNOG00000054989(Grhl1),ENSRNOG00000030118(Msn),ENSRNOG00000032034(Supt5h),ENSRNOG00000031544(Larp1),ENSRNOG00000009139(Fubp3),ENSRNOG00000002593(Esrrg),ENSRNOG00000004276(Itga3),ENSRNOG00000024194(Rsf1),ENSRNOG00000005616(Ncoa3),ENSRNOG00000054385(Rhebl1),ENSRNOG00000002265(Casr),ENSRNOG0…	1.32655	0.111558	1
GO:0031344	regulation of cell projection organization	biological_process	10	301	497	19765	ENSRNOG00000018009(Rab8b),ENSRNOG00000016448(Eef2k),ENSRNOG00000019692(Metrn),ENSRNOG00000015602(Cdh2),ENSRNOG00000049115(Ccr5),ENSRNOG00000020482(Nfatc4),ENSRNOG00000004276(Itga3),ENSRNOG00000014584(Odf2),ENSRNOG00000028946(Cdc42ep4),ENSRNOG00000019318(Syt3),	1.32122	0.293359	1
GO:0031301	integral component of organelle membrane	cellular_component	4	301	199	19765	ENSRNOG00000027434(Fitm2),ENSRNOG00000036866(Acer3),ENSRNOG00000000457(Tap1),ENSRNOG00000018574(Qsox2),	1.31989	0.38742	1
GO:0022407	regulation of cell-cell adhesion	biological_process	6	301	299	19765	ENSRNOG00000025111(Nfkbid),ENSRNOG00000049137(Zfp35),ENSRNOG00000026762(RT1-DOa),ENSRNOG00000013166(Wnt4),ENSRNOG00000017181(Malt1),ENSRNOG00000049115(Ccr5),	1.31768	0.358517	1
GO:0008047	enzyme activator activity	molecular_function	6	301	299	19765	ENSRNOG00000017181(Malt1),ENSRNOG00000008022(Apaf1),ENSRNOG00000032703(Rasgrp3),ENSRNOG00000025406(Iqgap2),ENSRNOG00000028946(Cdc42ep4),ENSRNOG00000018144(Depdc5),	1.31768	0.358517	1
GO:0005739	mitochondrion	cellular_component	30	301	1506	19765	ENSRNOG00000016825(Cd3eap),ENSRNOG00000019212(Tpp1),ENSRNOG00000015150(Spg7),ENSRNOG00000002509(Gnl3l),ENSRNOG00000012264(Alkbh1),ENSRNOG00000001073(RGD1563482),ENSRNOG00000034161(Cox6b1),ENSRNOG00000019817(Ddx28),ENSRNOG00000024128(Aco2),ENSRNOG00000011226(Timm8a1),ENSRNOG00000009250(Pts),ENSRNOG00000019165(Mrpl51),ENSRNOG00000018009(Rab8b),ENSRNOG00000018700(Mobp),ENSRNOG00000010169(Atpaf1),ENS…	1.30806	0.128202	1
GO:0051656	establishment of organelle localization	biological_process	6	301	302	19765	ENSRNOG00000019629(Lamp1),ENSRNOG00000018009(Rab8b),ENSRNOG00000001285(Atp2a2),ENSRNOG00000003971(Gosr1),ENSRNOG00000019318(Syt3),ENSRNOG00000000417(Numa1),	1.30459	0.37052	1
GO:0071363	cellular response to growth factor stimulus	biological_process	10	301	504	19765	ENSRNOG00000016448(Eef2k),ENSRNOG00000003261(Usp9x),ENSRNOG00000021200(Hfe2),ENSRNOG00000018901(Rab14),ENSRNOG00000013166(Wnt4),ENSRNOG00000004276(Itga3),ENSRNOG00000039859(Dnmt1),ENSRNOG00000002265(Casr),ENSRNOG00000025757(Myh6),ENSRNOG00000008022(Apaf1),	1.30287	0.312443	1
GO:0005515	protein binding	molecular_function	176	301	8871	19765	ENSRNOG00000014935(Peo1),ENSRNOG00000049115(Ccr5),ENSRNOG00000020751(Rdm1),ENSRNOG00000006462(Ero1l),ENSRNOG00000019630(Hacl1),ENSRNOG00000038365(Plekha2),ENSRNOG00000022893(Rimbp2),ENSRNOG00000000417(Numa1),ENSRNOG00000059801(Lima1),ENSRNOG00000006965(Aff4),ENSRNOG00000013336(Wdr70),ENSRNOG00000024194(Rsf1),ENSRNOG00000014584(Odf2),ENSRNOG00000011226(Timm8a1),ENSRNOG00000003261(Usp9x),ENSRNOG000…	1.30278	0.000712276	0.135649
GO:0033554	cellular response to stress	biological_process	29	301	1462	19765	ENSRNOG00000007203(Psmc6),ENSRNOG00000002255(Fam162a),ENSRNOG00000009348(Nos3),ENSRNOG00000006462(Ero1l),ENSRNOG00000020751(Rdm1),ENSRNOG00000057934(Tmx1),ENSRNOG00000016448(Eef2k),ENSRNOG00000001453(Baz1b),ENSRNOG00000018144(Depdc5),ENSRNOG00000001050(Eif2ak1),ENSRNOG00000017383(l7Rn6),ENSRNOG00000013166(Wnt4),ENSRNOG00000001285(Atp2a2),ENSRNOG00000019978(Parg),ENSRNOG00000008022(Apaf1),ENSRNOG0…	1.30251	0.139141	1
GO:0070486	leukocyte aggregation	biological_process	7	301	353	19765	ENSRNOG00000009184(Foxp1),ENSRNOG00000025111(Nfkbid),ENSRNOG00000049137(Zfp35),ENSRNOG00000026762(RT1-DOa),ENSRNOG00000026702(Amica1),ENSRNOG00000013166(Wnt4),ENSRNOG00000017181(Malt1),	1.30213	0.357434	1
GO:0060627	regulation of vesicle-mediated transport	biological_process	7	301	353	19765	ENSRNOG00000019318(Syt3),ENSRNOG00000019629(Lamp1),ENSRNOG00000001285(Atp2a2),ENSRNOG00000030118(Msn),ENSRNOG00000018009(Rab8b),ENSRNOG00000016448(Eef2k),ENSRNOG00000003971(Gosr1),	1.30213	0.357434	1
GO:0033044	regulation of chromosome organization	biological_process	4	301	202	19765	ENSRNOG00000025222(Pcid2),ENSRNOG00000027317(Ylpm1),ENSRNOG00000027787(Cdc6),ENSRNOG00000039859(Dnmt1),	1.30029	0.403028	1
GO:0045666	positive regulation of neuron differentiation	biological_process	6	301	303	19765	ENSRNOG00000016448(Eef2k),ENSRNOG00000049115(Ccr5),ENSRNOG00000019692(Metrn),ENSRNOG00000004276(Itga3),ENSRNOG00000060320(Lin28a),ENSRNOG00000019318(Syt3),	1.30029	0.374557	1
GO:0002682	regulation of immune system process	biological_process	19	301	960	19765	ENSRNOG00000002215(Mylk),ENSRNOG00000009184(Foxp1),ENSRNOG00000021614(Kmt2e),ENSRNOG00000019629(Lamp1),ENSRNOG00000012965(Themis2),ENSRNOG00000017181(Malt1),ENSRNOG00000026762(RT1-DOa),ENSRNOG00000011321(Rftn1),ENSRNOG00000003298(Cd247),ENSRNOG00000049137(Zfp35),ENSRNOG00000032224(Hist1h4b),ENSRNOG00000048932(Smagp),ENSRNOG00000025111(Nfkbid),ENSRNOG00000038999(RT1-A1),ENSRNOG00000031162(Ccl24),E…	1.29961	0.214175	1
GO:0003723	RNA binding	molecular_function	30	301	1518	19765	ENSRNOG00000060320(Lin28a),ENSRNOG00000010572(Pus7),ENSRNOG00000001426(Prkrip1),ENSRNOG00000039859(Dnmt1),ENSRNOG00000029115(RGD1564883),ENSRNOG00000028946(Cdc42ep4),ENSRNOG00000028814(Oasl2),ENSRNOG00000011859(Eif5a2),ENSRNOG00000027317(Ylpm1),ENSRNOG00000001073(RGD1563482),ENSRNOG00000002827(Rbfox1),ENSRNOG00000058561(Srrm2),ENSRNOG00000019817(Ddx28),ENSRNOG00000052968(Hnrnpa3),ENSRNOG000000206…	1.29772	0.138465	1
GO:0046486	glycerolipid metabolic process	biological_process	5	301	253	19765	ENSRNOG00000001189(Sik1),ENSRNOG00000000230(Lmf1),ENSRNOG00000027434(Fitm2),ENSRNOG00000003063(Phka1),ENSRNOG00000022268(Pnpla3),	1.29772	0.391799	1
GO:0032940	secretion by cell	biological_process	15	301	759	19765	ENSRNOG00000033101(Myo18a),ENSRNOG00000058940(Rab11fip1),ENSRNOG00000018009(Rab8b),ENSRNOG00000019727(Dph3),ENSRNOG00000019629(Lamp1),ENSRNOG00000000230(Lmf1),ENSRNOG00000049115(Ccr5),ENSRNOG00000000394(Srgn),ENSRNOG00000013171(Grm2),ENSRNOG00000001285(Atp2a2),ENSRNOG00000019318(Syt3),ENSRNOG00000047620(Golph3l),ENSRNOG00000002265(Casr),ENSRNOG00000059765(Asic1),ENSRNOG00000009184(Foxp1),	1.29772	0.256177	1
GO:0005730	nucleolus	cellular_component	13	301	659	19765	ENSRNOG00000001187(Oasl),ENSRNOG00000057934(Tmx1),ENSRNOG00000006965(Aff4),ENSRNOG00000031916(Timeless),ENSRNOG00000016133(Sumo1),ENSRNOG00000000956(Rasl11a),ENSRNOG00000001426(Prkrip1),ENSRNOG00000017181(Malt1),ENSRNOG00000002509(Gnl3l),ENSRNOG00000016825(Cd3eap),ENSRNOG00000019817(Ddx28),ENSRNOG00000060320(Lin28a),ENSRNOG00000020751(Rdm1),	1.29535	0.281872	1
GO:0097159	organic cyclic compound binding	molecular_function	109	301	5528	19765	ENSRNOG00000028662(Zfp69),ENSRNOG00000001134(Rfc5),ENSRNOG00000005193(Pfas),ENSRNOG00000019817(Ddx28),ENSRNOG00000058561(Srrm2),ENSRNOG00000025757(Myh6),ENSRNOG00000002827(Rbfox1),ENSRNOG00000001285(Atp2a2),ENSRNOG00000011321(Rftn1),ENSRNOG00000032034(Supt5h),ENSRNOG00000000934(Piwil1),ENSRNOG00000009139(Fubp3),ENSRNOG00000004730(Meis2),ENSRNOG00000018901(Rab14),ENSRNOG00000018009(Rab8b),ENSRNOG0…	1.29476	0.00853934	0.585457
GO:0030111	regulation of Wnt signaling pathway	biological_process	4	301	203	19765	ENSRNOG00000004276(Itga3),ENSRNOG00000010649(Ctnnd2),ENSRNOG00000015602(Cdh2),ENSRNOG00000013166(Wnt4),	1.29388	0.408277	1
GO:0035295	tube development	biological_process	12	301	610	19765	ENSRNOG00000008022(Apaf1),ENSRNOG00000005616(Ncoa3),ENSRNOG00000002265(Casr),ENSRNOG00000009184(Foxp1),ENSRNOG00000004276(Itga3),ENSRNOG00000009348(Nos3),ENSRNOG00000017383(l7Rn6),ENSRNOG00000013166(Wnt4),ENSRNOG00000000417(Numa1),ENSRNOG00000031916(Timeless),ENSRNOG00000020482(Nfatc4),ENSRNOG00000036745(Gna13),	1.29176	0.298299	1
GO:0046872	metal ion binding	molecular_function	63	301	3214	19765	ENSRNOG00000049137(Zfp35),ENSRNOG00000011663(Rnf7),ENSRNOG00000026569(LOC102555377),ENSRNOG00000059801(Lima1),ENSRNOG00000036745(Gna13),ENSRNOG00000022971(LOC102555919),ENSRNOG00000010124(Trim2),ENSRNOG00000034134(Cpm),ENSRNOG00000060320(Lin28a),ENSRNOG00000019630(Hacl1),ENSRNOG00000010985(Zfp410),ENSRNOG00000000308(Zbtb24),ENSRNOG00000009348(Nos3),ENSRNOG00000012436(Adh6),ENSRNOG00000006639(Scn9…	1.28714	0.0462657	1
GO:0035239	tube morphogenesis	biological_process	7	301	358	19765	ENSRNOG00000008022(Apaf1),ENSRNOG00000005616(Ncoa3),ENSRNOG00000002265(Casr),ENSRNOG00000031916(Timeless),ENSRNOG00000020482(Nfatc4),ENSRNOG00000036745(Gna13),ENSRNOG00000013166(Wnt4),	1.28394	0.375786	1
GO:0006887	exocytosis	biological_process	5	301	256	19765	ENSRNOG00000019318(Syt3),ENSRNOG00000019629(Lamp1),ENSRNOG00000058940(Rab11fip1),ENSRNOG00000018009(Rab8b),ENSRNOG00000001285(Atp2a2),	1.28251	0.405598	1
GO:0071417	cellular response to organonitrogen compound	biological_process	8	301	410	19765	ENSRNOG00000039859(Dnmt1),ENSRNOG00000018009(Rab8b),ENSRNOG00000004158(Hdac9),ENSRNOG00000002011(Gnrhr),ENSRNOG00000020444(Hcn3),ENSRNOG00000016448(Eef2k),ENSRNOG00000027787(Cdc6),ENSRNOG00000002265(Casr),	1.28126	0.3642	1
GO:0045184	establishment of protein localization	biological_process	29	301	1487	19765	ENSRNOG00000008424(Aagab),ENSRNOG00000004276(Itga3),ENSRNOG00000000230(Lmf1),ENSRNOG00000013166(Wnt4),ENSRNOG00000017383(l7Rn6),ENSRNOG00000019220(Rhod),ENSRNOG00000000394(Srgn),ENSRNOG00000047620(Golph3l),ENSRNOG00000009184(Foxp1),ENSRNOG00000002265(Casr),ENSRNOG00000018714(Arl5b),ENSRNOG00000015602(Cdh2),ENSRNOG00000011226(Timm8a1),ENSRNOG00000000633(Rhobtb1),ENSRNOG00000033101(Myo18a),ENSRNOG0…	1.28061	0.162908	1
GO:0016772	transferase activity, transferring phosphorus-containing groups	molecular_function	18	301	924	19765	ENSRNOG00000052506(Ak3),ENSRNOG00000001050(Eif2ak1),ENSRNOG00000001453(Baz1b),ENSRNOG00000001189(Sik1),ENSRNOG00000016448(Eef2k),ENSRNOG00000021200(Hfe2),ENSRNOG00000009783(Camk2g),ENSRNOG00000028814(Oasl2),ENSRNOG00000003063(Phka1),ENSRNOG00000014628(Pomk),ENSRNOG00000025423(Map3k13),ENSRNOG00000038720(Cdkl1),ENSRNOG00000002215(Mylk),ENSRNOG00000012818(Ksr1),ENSRNOG00000012358(Pcyt1b),ENSRNOG000…	1.27918	0.247812	1
GO:0042803	protein homodimerization activity	molecular_function	12	301	616	19765	ENSRNOG00000012436(Adh6),ENSRNOG00000008064(Naga),ENSRNOG00000026702(Amica1),ENSRNOG00000009184(Foxp1),ENSRNOG00000025423(Map3k13),ENSRNOG00000009250(Pts),ENSRNOG00000001811(Fgfr1op2),ENSRNOG00000009783(Camk2g),ENSRNOG00000048932(Smagp),ENSRNOG00000001050(Eif2ak1),ENSRNOG00000016983(Myh7),ENSRNOG00000031916(Timeless),	1.27918	0.313084	1
GO:0032403	protein complex binding	molecular_function	17	301	873	19765	ENSRNOG00000026702(Amica1),ENSRNOG00000028856(Pknox2),ENSRNOG00000025406(Iqgap2),ENSRNOG00000002265(Casr),ENSRNOG00000004276(Itga3),ENSRNOG00000000394(Srgn),ENSRNOG00000016655(Pex6),ENSRNOG00000018144(Depdc5),ENSRNOG00000046276(Myh3),ENSRNOG00000026762(RT1-DOa),ENSRNOG00000000417(Numa1),ENSRNOG00000059801(Lima1),ENSRNOG00000033101(Myo18a),ENSRNOG00000000841(Ddx39b),ENSRNOG00000015602(Cdh2),ENSRNO…	1.27869	0.258137	1
GO:0050776	regulation of immune response	biological_process	9	301	463	19765	ENSRNOG00000038999(RT1-A1),ENSRNOG00000019629(Lamp1),ENSRNOG00000012965(Themis2),ENSRNOG00000017181(Malt1),ENSRNOG00000000457(Tap1),ENSRNOG00000011321(Rftn1),ENSRNOG00000003298(Cd247),ENSRNOG00000049137(Zfp35),ENSRNOG00000048932(Smagp),	1.27641	0.355574	1
GO:0000981	RNA polymerase II transcription factor activity, sequence-specific DNA binding	molecular_function	11	301	566	19765	ENSRNOG00000002593(Esrrg),ENSRNOG00000005616(Ncoa3),ENSRNOG00000009184(Foxp1),ENSRNOG00000007408(Ebf4),ENSRNOG00000020482(Nfatc4),ENSRNOG00000004730(Meis2),ENSRNOG00000027317(Ylpm1),ENSRNOG00000019653(Csrnp2),ENSRNOG00000007887(Elk4),ENSRNOG00000054989(Grhl1),ENSRNOG00000009139(Fubp3),	1.27616	0.329284	1
GO:0015267	channel activity	molecular_function	8	301	413	19765	ENSRNOG00000005491(Best3),ENSRNOG00000059765(Asic1),ENSRNOG00000006639(Scn9a),ENSRNOG00000001427(Orai2),ENSRNOG00000015746(Kcng4),ENSRNOG00000057221(Scn3b),ENSRNOG00000020444(Hcn3),ENSRNOG00000013610(Chrna5),	1.27195	0.374435	1
GO:0050778	positive regulation of immune response	biological_process	7	301	362	19765	ENSRNOG00000011321(Rftn1),ENSRNOG00000003298(Cd247),ENSRNOG00000048932(Smagp),ENSRNOG00000038999(RT1-A1),ENSRNOG00000019629(Lamp1),ENSRNOG00000012965(Themis2),ENSRNOG00000017181(Malt1),	1.26975	0.390749	1
GO:0045926	negative regulation of growth	biological_process	4	301	207	19765	ENSRNOG00000027592(Rerg),ENSRNOG00000047080(Gng4),ENSRNOG00000049115(Ccr5),ENSRNOG00000008065(Wwc1),	1.26888	0.429495	1
GO:0001666	response to hypoxia	biological_process	6	301	311	19765	ENSRNOG00000002255(Fam162a),ENSRNOG00000009783(Camk2g),ENSRNOG00000008619(Agtrap),ENSRNOG00000002265(Casr),ENSRNOG00000006462(Ero1l),ENSRNOG00000008022(Apaf1),	1.26684	0.407486	1
GO:0010498	proteasomal protein catabolic process	biological_process	7	301	364	19765	ENSRNOG00000001719(Psmd2),ENSRNOG00000011663(Rnf7),ENSRNOG00000016133(Sumo1),ENSRNOG00000007203(Psmc6),ENSRNOG00000025222(Pcid2),ENSRNOG00000003261(Usp9x),ENSRNOG00000005749(Foxred2),	1.26278	0.398321	1
GO:0000785	chromatin	cellular_component	8	301	417	19765	ENSRNOG00000016133(Sumo1),ENSRNOG00000001453(Baz1b),ENSRNOG00000005616(Ncoa3),ENSRNOG00000032224(Hist1h4b),ENSRNOG00000006965(Aff4),ENSRNOG00000032929(Incenp),ENSRNOG00000031916(Timeless),ENSRNOG00000039859(Dnmt1),	1.25975	0.388275	1
GO:0051493	regulation of cytoskeleton organization	biological_process	7	301	366	19765	ENSRNOG00000013166(Wnt4),ENSRNOG00000009571(Wipf3),ENSRNOG00000019220(Rhod),ENSRNOG00000031162(Ccl24),ENSRNOG00000025406(Iqgap2),ENSRNOG00000059801(Lima1),ENSRNOG00000028946(Cdc42ep4),	1.25588	0.405952	1
GO:0000323	lytic vacuole	cellular_component	7	301	366	19765	ENSRNOG00000018144(Depdc5),ENSRNOG00000008064(Naga),ENSRNOG00000019212(Tpp1),ENSRNOG00000019629(Lamp1),ENSRNOG00000011820(Acpp),ENSRNOG00000000394(Srgn),ENSRNOG00000018901(Rab14),	1.25588	0.405952	1
GO:0005764	lysosome	cellular_component	7	301	366	19765	ENSRNOG00000019212(Tpp1),ENSRNOG00000019629(Lamp1),ENSRNOG00000011820(Acpp),ENSRNOG00000000394(Srgn),ENSRNOG00000018901(Rab14),ENSRNOG00000018144(Depdc5),ENSRNOG00000008064(Naga),	1.25588	0.405952	1
GO:0043269	regulation of ion transport	biological_process	10	301	523	19765	ENSRNOG00000002265(Casr),ENSRNOG00000005491(Best3),ENSRNOG00000002215(Mylk),ENSRNOG00000009348(Nos3),ENSRNOG00000057221(Scn3b),ENSRNOG00000015746(Kcng4),ENSRNOG00000006639(Scn9a),ENSRNOG00000016133(Sumo1),ENSRNOG00000001189(Sik1),ENSRNOG00000020444(Hcn3),	1.25553	0.367265	1
GO:0016301	kinase activity	molecular_function	15	301	785	19765	ENSRNOG00000014628(Pomk),ENSRNOG00000003063(Phka1),ENSRNOG00000009783(Camk2g),ENSRNOG00000021200(Hfe2),ENSRNOG00000016448(Eef2k),ENSRNOG00000001189(Sik1),ENSRNOG00000001453(Baz1b),ENSRNOG00000001050(Eif2ak1),ENSRNOG00000052506(Ak3),ENSRNOG00000028913(LOC688970),ENSRNOG00000014049(Riok1),ENSRNOG00000012818(Ksr1),ENSRNOG00000002215(Mylk),ENSRNOG00000038720(Cdkl1),ENSRNOG00000025423(Map3k13),	1.25473	0.310117	1
GO:0000902	cell morphogenesis	biological_process	20	301	1050	19765	ENSRNOG00000019692(Metrn),ENSRNOG00000049115(Ccr5),ENSRNOG00000024450(Poc1b),ENSRNOG00000019318(Syt3),ENSRNOG00000016448(Eef2k),ENSRNOG00000036745(Gna13),ENSRNOG00000009571(Wipf3),ENSRNOG00000007744(Ehd3),ENSRNOG00000027434(Fitm2),ENSRNOG00000028946(Cdc42ep4),ENSRNOG00000013166(Wnt4),ENSRNOG00000014584(Odf2),ENSRNOG00000009184(Foxp1),ENSRNOG00000003261(Usp9x),ENSRNOG00000045524(Slc39a3),ENSRNOG00…	1.25075	0.267669	1
GO:0051047	positive regulation of secretion	biological_process	6	301	315	19765	ENSRNOG00000018009(Rab8b),ENSRNOG00000033101(Myo18a),ENSRNOG00000019629(Lamp1),ENSRNOG00000049115(Ccr5),ENSRNOG00000002265(Casr),ENSRNOG00000047620(Golph3l),	1.25075	0.424351	1
GO:0034622	cellular macromolecular complex assembly	biological_process	14	301	736	19765	ENSRNOG00000009571(Wipf3),ENSRNOG00000031162(Ccl24),ENSRNOG00000000841(Ddx39b),ENSRNOG00000032224(Hist1h4b),ENSRNOG00000010169(Atpaf1),ENSRNOG00000021555(Mis18a),ENSRNOG00000028946(Cdc42ep4),ENSRNOG00000049695(Myh1),ENSRNOG00000029115(RGD1564883),ENSRNOG00000007203(Psmc6),ENSRNOG00000019817(Ddx28),ENSRNOG00000048606(Vma21),ENSRNOG00000024178(Cenpt),ENSRNOG00000025406(Iqgap2),	1.24905	0.328674	1
GO:0030141	secretory granule	cellular_component	5	301	263	19765	ENSRNOG00000000394(Srgn),ENSRNOG00000018901(Rab14),ENSRNOG00000018009(Rab8b),ENSRNOG00000019629(Lamp1),ENSRNOG00000011820(Acpp),	1.24837	0.438456	1
GO:0018205	peptidyl-lysine modification	biological_process	5	301	263	19765	ENSRNOG00000005616(Ncoa3),ENSRNOG00000016133(Sumo1),ENSRNOG00000021614(Kmt2e),ENSRNOG00000039859(Dnmt1),ENSRNOG00000004158(Hdac9),	1.24837	0.438456	1
GO:0030031	cell projection assembly	biological_process	6	301	316	19765	ENSRNOG00000019220(Rhod),ENSRNOG00000007744(Ehd3),ENSRNOG00000014584(Odf2),ENSRNOG00000024450(Poc1b),ENSRNOG00000028946(Cdc42ep4),ENSRNOG00000002215(Mylk),	1.24679	0.428607	1
GO:0005774	vacuolar membrane	cellular_component	4	301	211	19765	ENSRNOG00000011820(Acpp),ENSRNOG00000018144(Depdc5),ENSRNOG00000019629(Lamp1),ENSRNOG00000018901(Rab14),	1.24482	0.45105	1
GO:0030054	cell junction	cellular_component	17	301	898	19765	ENSRNOG00000017383(l7Rn6),ENSRNOG00000013171(Grm2),ENSRNOG00000001285(Atp2a2),ENSRNOG00000013610(Chrna5),ENSRNOG00000004276(Itga3),ENSRNOG00000025757(Myh6),ENSRNOG00000026466(Lrrtm3),ENSRNOG00000011228(Layn),ENSRNOG00000026702(Amica1),ENSRNOG00000002215(Mylk),ENSRNOG00000030118(Msn),ENSRNOG00000036745(Gna13),ENSRNOG00000015602(Cdh2),ENSRNOG00000007744(Ehd3),ENSRNOG00000016983(Myh7),ENSRNOG0000004…	1.24309	0.306323	1
GO:0042995	cell projection	cellular_component	30	301	1586	19765	ENSRNOG00000015602(Cdh2),ENSRNOG00000030118(Msn),ENSRNOG00000009620(Cybrd1),ENSRNOG00000003261(Usp9x),ENSRNOG00000020444(Hcn3),ENSRNOG00000060693(AC118147.2),ENSRNOG00000010649(Ctnnd2),ENSRNOG00000016133(Sumo1),ENSRNOG00000004276(Itga3),ENSRNOG00000017975(Dnajb13),ENSRNOG00000052968(Hnrnpa3),ENSRNOG00000002215(Mylk),ENSRNOG00000014584(Odf2),ENSRNOG00000002265(Casr),ENSRNOG00000007744(Ehd3),ENSRNO…	1.24208	0.207501	1
GO:0061024	membrane organization	biological_process	13	301	688	19765	ENSRNOG00000016133(Sumo1),ENSRNOG00000011321(Rftn1),ENSRNOG00000033101(Myo18a),ENSRNOG00000007744(Ehd3),ENSRNOG00000015602(Cdh2),ENSRNOG00000003971(Gosr1),ENSRNOG00000018009(Rab8b),ENSRNOG00000019318(Syt3),ENSRNOG00000021213(Lix1l),ENSRNOG00000004276(Itga3),ENSRNOG00000057221(Scn3b),ENSRNOG00000001285(Atp2a2),ENSRNOG00000013166(Wnt4),	1.24075	0.351237	1
GO:0005856	cytoskeleton	cellular_component	29	301	1535	19765	ENSRNOG00000030118(Msn),ENSRNOG00000036699(RGD1306926),ENSRNOG00000015602(Cdh2),ENSRNOG00000020482(Nfatc4),ENSRNOG00000010999(Cep295),ENSRNOG00000033101(Myo18a),ENSRNOG00000007504(Actr10),ENSRNOG00000031916(Timeless),ENSRNOG00000049695(Myh1),ENSRNOG00000025757(Myh6),ENSRNOG00000014584(Odf2),ENSRNOG00000028856(Pknox2),ENSRNOG00000004345(Daam1),ENSRNOG00000002215(Mylk),ENSRNOG00000009571(Wipf3),ENS…	1.24057	0.215943	1
GO:0002764	immune response-regulating signaling pathway	biological_process	4	301	212	19765	ENSRNOG00000012965(Themis2),ENSRNOG00000003298(Cd247),ENSRNOG00000011321(Rftn1),ENSRNOG00000017181(Malt1),	1.23895	0.456489	1
GO:0050863	regulation of T cell activation	biological_process	4	301	212	19765	ENSRNOG00000026762(RT1-DOa),ENSRNOG00000025111(Nfkbid),ENSRNOG00000017181(Malt1),ENSRNOG00000049137(Zfp35),	1.23895	0.456489	1
GO:0031981	nuclear lumen	cellular_component	46	301	2438	19765	ENSRNOG00000022939(Gpkow),ENSRNOG00000017181(Malt1),ENSRNOG00000001426(Prkrip1),ENSRNOG00000007203(Psmc6),ENSRNOG00000008405(Taco1),ENSRNOG00000001453(Baz1b),ENSRNOG00000000956(Rasl11a),ENSRNOG00000011885(Rhpn2),ENSRNOG00000004158(Hdac9),ENSRNOG00000007887(Elk4),ENSRNOG00000027317(Ylpm1),ENSRNOG00000057934(Tmx1),ENSRNOG00000021614(Kmt2e),ENSRNOG00000005616(Ncoa3),ENSRNOG00000015787(P3h4),ENSRNOG0…	1.23895	0.135767	1
GO:0005737	cytoplasm	cellular_component	160	301	8490	19765	ENSRNOG00000009783(Camk2g),ENSRNOG00000002254(Tmem33),ENSRNOG00000001161(Gatc),ENSRNOG00000010855(Mrp63),ENSRNOG00000027434(Fitm2),ENSRNOG00000007102(Acss1),ENSRNOG00000027787(Cdc6),ENSRNOG00000055408(Gcat),ENSRNOG00000015734(Ube3a),ENSRNOG00000003980(Ttc1),ENSRNOG00000011820(Acpp),ENSRNOG00000024450(Poc1b),ENSRNOG00000043204(Harbi1),ENSRNOG00000003063(Phka1),ENSRNOG00000005749(Foxred2),ENSRNOG00…	1.23749	0.00840089	0.58772
GO:0051128	regulation of cellular component organization	biological_process	35	301	1863	19765	ENSRNOG00000030118(Msn),ENSRNOG00000018009(Rab8b),ENSRNOG00000010999(Cep295),ENSRNOG00000031162(Ccl24),ENSRNOG00000000841(Ddx39b),ENSRNOG00000015602(Cdh2),ENSRNOG00000020482(Nfatc4),ENSRNOG00000021555(Mis18a),ENSRNOG00000016133(Sumo1),ENSRNOG00000019220(Rhod),ENSRNOG00000013166(Wnt4),ENSRNOG00000004276(Itga3),ENSRNOG00000027592(Rerg),ENSRNOG00000014584(Odf2),ENSRNOG00000026466(Lrrtm3),ENSRNOG0000…	1.23363	0.191914	1
GO:0043623	cellular protein complex assembly	biological_process	8	301	427	19765	ENSRNOG00000048606(Vma21),ENSRNOG00000010169(Atpaf1),ENSRNOG00000025406(Iqgap2),ENSRNOG00000028946(Cdc42ep4),ENSRNOG00000049695(Myh1),ENSRNOG00000024178(Cenpt),ENSRNOG00000009571(Wipf3),ENSRNOG00000031162(Ccl24),	1.23025	0.423796	1
GO:0006928	movement of cell or subcellular component	biological_process	26	301	1390	19765	ENSRNOG00000033101(Myo18a),ENSRNOG00000007504(Actr10),ENSRNOG00000031162(Ccl24),ENSRNOG00000015602(Cdh2),ENSRNOG00000003261(Usp9x),ENSRNOG00000030118(Msn),ENSRNOG00000016133(Sumo1),ENSRNOG00000004276(Itga3),ENSRNOG00000015150(Spg7),ENSRNOG00000057221(Scn3b),ENSRNOG00000001285(Atp2a2),ENSRNOG00000019220(Rhod),ENSRNOG00000013166(Wnt4),ENSRNOG00000002215(Mylk),ENSRNOG00000025757(Myh6),ENSRNOG0000000…	1.22826	0.255097	1
GO:0048812	neuron projection morphogenesis	biological_process	9	301	482	19765	ENSRNOG00000049115(Ccr5),ENSRNOG00000020482(Nfatc4),ENSRNOG00000015602(Cdh2),ENSRNOG00000019692(Metrn),ENSRNOG00000016448(Eef2k),ENSRNOG00000003261(Usp9x),ENSRNOG00000010649(Ctnnd2),ENSRNOG00000019318(Syt3),ENSRNOG00000009184(Foxp1),	1.2261	0.417366	1
GO:0010557	positive regulation of macromolecule biosynthetic process	biological_process	26	301	1395	19765	ENSRNOG00000024194(Rsf1),ENSRNOG00000005616(Ncoa3),ENSRNOG00000025423(Map3k13),ENSRNOG00000054385(Rhebl1),ENSRNOG00000009184(Foxp1),ENSRNOG00000021614(Kmt2e),ENSRNOG00000002593(Esrrg),ENSRNOG00000013166(Wnt4),ENSRNOG00000032034(Supt5h),ENSRNOG00000031544(Larp1),ENSRNOG00000009139(Fubp3),ENSRNOG00000019653(Csrnp2),ENSRNOG00000000841(Ddx39b),ENSRNOG00000020482(Nfatc4),ENSRNOG00000004730(Meis2),ENSR…	1.22385	0.262292	1
GO:0042578	phosphoric ester hydrolase activity	molecular_function	6	301	322	19765	ENSRNOG00000011820(Acpp),ENSRNOG00000005711(Ptprd),ENSRNOG00000011071(Nt5e),ENSRNOG00000052061(Ppef2),ENSRNOG00000042289(Plcxd2),ENSRNOG00000017600(Ptpn9),	1.22356	0.454462	1
GO:0007005	mitochondrion organization	biological_process	9	301	483	19765	ENSRNOG00000002255(Fam162a),ENSRNOG00000020377(Cideb),ENSRNOG00000007124(Krcc1),ENSRNOG00000014935(Peo1),ENSRNOG00000015150(Spg7),ENSRNOG00000001073(RGD1563482),ENSRNOG00000010169(Atpaf1),ENSRNOG00000021555(Mis18a),ENSRNOG00000002215(Mylk),	1.22356	0.420737	1
GO:0030097	hemopoiesis	biological_process	12	301	644	19765	ENSRNOG00000026762(RT1-DOa),ENSRNOG00000001050(Eif2ak1),ENSRNOG00000025111(Nfkbid),ENSRNOG00000049137(Zfp35),ENSRNOG00000032224(Hist1h4b),ENSRNOG00000004730(Meis2),ENSRNOG00000025222(Pcid2),ENSRNOG00000009184(Foxp1),ENSRNOG00000021614(Kmt2e),ENSRNOG00000013166(Wnt4),ENSRNOG00000017181(Malt1),ENSRNOG00000000308(Zbtb24),	1.22356	0.386875	1
GO:0008406	gonad development	biological_process	4	301	215	19765	ENSRNOG00000013166(Wnt4),ENSRNOG00000009348(Nos3),ENSRNOG00000012358(Pcyt1b),ENSRNOG00000015734(Ube3a),	1.22166	0.472916	1
GO:0043270	positive regulation of ion transport	biological_process	4	301	215	19765	ENSRNOG00000002215(Mylk),ENSRNOG00000016133(Sumo1),ENSRNOG00000057221(Scn3b),ENSRNOG00000002265(Casr),	1.22166	0.472916	1
GO:0003824	catalytic activity	molecular_function	101	301	5432	19765	ENSRNOG00000013110(Nudt2),ENSRNOG00000006523(Atl2),ENSRNOG00000052061(Ppef2),ENSRNOG00000016953(Chst4),ENSRNOG00000019044(Adam30),ENSRNOG00000012037(Galnt7),ENSRNOG00000033101(Myo18a),ENSRNOG00000022268(Pnpla3),ENSRNOG00000005616(Ncoa3),ENSRNOG00000050828(Vkorc1),ENSRNOG00000042289(Plcxd2),ENSRNOG00000017600(Ptpn9),ENSRNOG00000014049(Riok1),ENSRNOG00000019212(Tpp1),ENSRNOG00000056011(AC139950.1),…	1.22093	0.046237	1
GO:0007548	sex differentiation	biological_process	5	301	269	19765	ENSRNOG00000015734(Ube3a),ENSRNOG00000013166(Wnt4),ENSRNOG00000009348(Nos3),ENSRNOG00000012358(Pcyt1b),ENSRNOG00000005616(Ncoa3),	1.22053	0.4673	1
GO:0055074	calcium ion homeostasis	biological_process	6	301	323	19765	ENSRNOG00000001285(Atp2a2),ENSRNOG00000036745(Gna13),ENSRNOG00000004585(Tmtc2),ENSRNOG00000049115(Ccr5),ENSRNOG00000002265(Casr),ENSRNOG00000006462(Ero1l),	1.21977	0.458822	1
GO:0001775	cell activation	biological_process	13	301	700	19765	ENSRNOG00000025222(Pcid2),ENSRNOG00000036745(Gna13),ENSRNOG00000013674(Megf10),ENSRNOG00000011975(Crtc3),ENSRNOG00000025111(Nfkbid),ENSRNOG00000049137(Zfp35),ENSRNOG00000026762(RT1-DOa),ENSRNOG00000013166(Wnt4),ENSRNOG00000017181(Malt1),ENSRNOG00000019629(Lamp1),ENSRNOG00000009184(Foxp1),ENSRNOG00000021614(Kmt2e),ENSRNOG00000026702(Amica1),	1.21948	0.382208	1
GO:0001944	vasculature development	biological_process	10	301	541	19765	ENSRNOG00000002215(Mylk),ENSRNOG00000049115(Ccr5),ENSRNOG00000009348(Nos3),ENSRNOG00000013166(Wnt4),ENSRNOG00000031162(Ccl24),ENSRNOG00000015602(Cdh2),ENSRNOG00000020482(Nfatc4),ENSRNOG00000036745(Gna13),ENSRNOG00000004158(Hdac9),ENSRNOG00000005957(Slc4a7),	1.21376	0.422984	1
GO:0034109	homotypic cell-cell adhesion	biological_process	5	301	271	19765	ENSRNOG00000017181(Malt1),ENSRNOG00000026762(RT1-DOa),ENSRNOG00000013674(Megf10),ENSRNOG00000025111(Nfkbid),ENSRNOG00000049137(Zfp35),	1.21152	0.477043	1
GO:0009117	nucleotide metabolic process	biological_process	10	301	542	19765	ENSRNOG00000018326(Pgls),ENSRNOG00000011071(Nt5e),ENSRNOG00000025757(Myh6),ENSRNOG00000005193(Pfas),ENSRNOG00000011820(Acpp),ENSRNOG00000056011(AC139950.1),ENSRNOG00000046276(Myh3),ENSRNOG00000016983(Myh7),ENSRNOG00000052506(Ak3),ENSRNOG00000028814(Oasl2),	1.21152	0.42618	1
GO:0040017	positive regulation of locomotion	biological_process	7	301	380	19765	ENSRNOG00000031162(Ccl24),ENSRNOG00000049115(Ccr5),ENSRNOG00000004276(Itga3),ENSRNOG00000019220(Rhod),ENSRNOG00000004158(Hdac9),ENSRNOG00000002215(Mylk),ENSRNOG00000002265(Casr),	1.20961	0.460928	1
GO:0031090	organelle membrane	cellular_component	35	301	1901	19765	ENSRNOG00000006462(Ero1l),ENSRNOG00000053269(Tmem106c),ENSRNOG00000016655(Pex6),ENSRNOG00000003980(Ttc1),ENSRNOG00000011820(Acpp),ENSRNOG00000019629(Lamp1),ENSRNOG00000027434(Fitm2),ENSRNOG00000019830(Hsd17b1),ENSRNOG00000018144(Depdc5),ENSRNOG00000000417(Numa1),ENSRNOG00000000457(Tap1),ENSRNOG00000058940(Rab11fip1),ENSRNOG00000003971(Gosr1),ENSRNOG00000009783(Camk2g),ENSRNOG00000008619(Agtrap),E…	1.20897	0.23264	1
GO:0007267	cell-cell signaling	biological_process	15	301	817	19765	ENSRNOG00000038184(Camk2n2),ENSRNOG00000020482(Nfatc4),ENSRNOG00000018009(Rab8b),ENSRNOG00000009826(Bche),ENSRNOG00000058940(Rab11fip1),ENSRNOG00000009783(Camk2g),ENSRNOG00000010649(Ctnnd2),ENSRNOG00000006639(Scn9a),ENSRNOG00000057221(Scn3b),ENSRNOG00000001285(Atp2a2),ENSRNOG00000013171(Grm2),ENSRNOG00000013610(Chrna5),ENSRNOG00000019318(Syt3),ENSRNOG00000059765(Asic1),ENSRNOG00000002265(Casr),	1.20559	0.384126	1
GO:0051302	regulation of cell division	biological_process	4	301	218	19765	ENSRNOG00000027787(Cdc6),ENSRNOG00000005616(Ncoa3),ENSRNOG00000025222(Pcid2),ENSRNOG00000013166(Wnt4),	1.20485	0.489504	1
GO:0008270	zinc ion binding	molecular_function	19	301	1036	19765	ENSRNOG00000013557(Lancl1),ENSRNOG00000001453(Baz1b),ENSRNOG00000011663(Rnf7),ENSRNOG00000059801(Lima1),ENSRNOG00000060320(Lin28a),ENSRNOG00000010124(Trim2),ENSRNOG00000034134(Cpm),ENSRNOG00000039859(Dnmt1),ENSRNOG00000012436(Adh6),ENSRNOG00000007629(Sf3a3),ENSRNOG00000038445(Rnf225),ENSRNOG00000019044(Adam30),ENSRNOG00000023312(Lonrf2),ENSRNOG00000024194(Rsf1),ENSRNOG00000017157(Trim69),ENSRNOG0…	1.20427	0.350301	1
GO:0009986	cell surface	cellular_component	12	301	656	19765	ENSRNOG00000021200(Hfe2),ENSRNOG00000059801(Lima1),ENSRNOG00000019629(Lamp1),ENSRNOG00000004276(Itga3),ENSRNOG00000049115(Ccr5),ENSRNOG00000013166(Wnt4),ENSRNOG00000011071(Nt5e),ENSRNOG00000002215(Mylk),ENSRNOG00000025406(Iqgap2),ENSRNOG00000059765(Asic1),ENSRNOG00000002265(Casr),ENSRNOG00000034134(Cpm),	1.20118	0.420763	1
GO:0044444	cytoplasmic part	cellular_component	110	301	6025	19765	ENSRNOG00000016983(Myh7),ENSRNOG00000027434(Fitm2),ENSRNOG00000010855(Mrp63),ENSRNOG00000029115(RGD1564883),ENSRNOG00000055408(Gcat),ENSRNOG00000027787(Cdc6),ENSRNOG00000007102(Acss1),ENSRNOG00000002254(Tmem33),ENSRNOG00000009571(Wipf3),ENSRNOG00000001161(Gatc),ENSRNOG00000009783(Camk2g),ENSRNOG00000024450(Poc1b),ENSRNOG00000002255(Fam162a),ENSRNOG00000016655(Pex6),ENSRNOG00000003980(Ttc1),ENSRNO…	1.19885	0.0579741	1
GO:0014706	striated muscle tissue development	biological_process	6	301	329	19765	ENSRNOG00000000841(Ddx39b),ENSRNOG00000025757(Myh6),ENSRNOG00000009184(Foxp1),ENSRNOG00000016983(Myh7),ENSRNOG00000013674(Megf10),ENSRNOG00000001189(Sik1),	1.19753	0.485275	1
GO:0046914	transition metal ion binding	molecular_function	24	301	1320	19765	ENSRNOG00000052061(Ppef2),ENSRNOG00000019044(Adam30),ENSRNOG00000024128(Aco2),ENSRNOG00000007629(Sf3a3),ENSRNOG00000038445(Rnf225),ENSRNOG00000023312(Lonrf2),ENSRNOG00000017157(Trim69),ENSRNOG00000024194(Rsf1),ENSRNOG00000012264(Alkbh1),ENSRNOG00000021614(Kmt2e),ENSRNOG00000015150(Spg7),ENSRNOG00000002593(Esrrg),ENSRNOG00000029064(Zcchc4),ENSRNOG00000011663(Rnf7),ENSRNOG00000059801(Lima1),ENSRNOG…	1.1939	0.330128	1
GO:0045137	development of primary sexual characteristics	biological_process	4	301	220	19765	ENSRNOG00000013166(Wnt4),ENSRNOG00000009348(Nos3),ENSRNOG00000012358(Pcyt1b),ENSRNOG00000015734(Ube3a),	1.1939	0.500646	1
GO:0051258	protein polymerization	biological_process	4	301	220	19765	ENSRNOG00000031162(Ccl24),ENSRNOG00000025406(Iqgap2),ENSRNOG00000028946(Cdc42ep4),ENSRNOG00000009571(Wipf3),	1.1939	0.500646	1
GO:0015031	protein transport	biological_process	25	301	1376	19765	ENSRNOG00000000956(Rasl11a),ENSRNOG00000051711(Kpna1),ENSRNOG00000007744(Ehd3),ENSRNOG00000000457(Tap1),ENSRNOG00000058940(Rab11fip1),ENSRNOG00000003971(Gosr1),ENSRNOG00000049115(Ccr5),ENSRNOG00000016655(Pex6),ENSRNOG00000019727(Dph3),ENSRNOG00000011321(Rftn1),ENSRNOG00000021555(Mis18a),ENSRNOG00000011226(Timm8a1),ENSRNOG00000033101(Myo18a),ENSRNOG00000000633(Rhobtb1),ENSRNOG00000018009(Rab8b),EN…	1.19303	0.32466	1
GO:0019904	protein domain specific binding	molecular_function	10	301	551	19765	ENSRNOG00000013557(Lancl1),ENSRNOG00000038365(Plekha2),ENSRNOG00000018009(Rab8b),ENSRNOG00000009571(Wipf3),ENSRNOG00000042029(Efs),ENSRNOG00000058561(Srrm2),ENSRNOG00000002593(Esrrg),ENSRNOG00000004276(Itga3),ENSRNOG00000019629(Lamp1),ENSRNOG00000039859(Dnmt1),	1.19173	0.455381	1
GO:0030425	dendrite	cellular_component	8	301	441	19765	ENSRNOG00000016133(Sumo1),ENSRNOG00000000417(Numa1),ENSRNOG00000006462(Ero1l),ENSRNOG00000019629(Lamp1),ENSRNOG00000013610(Chrna5),ENSRNOG00000020444(Hcn3),ENSRNOG00000014409(Myl7),ENSRNOG00000013171(Grm2),	1.19119	0.475568	1
GO:0044257	cellular protein catabolic process	biological_process	10	301	552	19765	ENSRNOG00000003261(Usp9x),ENSRNOG00000010794(Dennd3),ENSRNOG00000030118(Msn),ENSRNOG00000025222(Pcid2),ENSRNOG00000005749(Foxred2),ENSRNOG00000016133(Sumo1),ENSRNOG00000001719(Psmd2),ENSRNOG00000011663(Rnf7),ENSRNOG00000007203(Psmc6),ENSRNOG00000015734(Ube3a),	1.18957	0.458673	1
GO:0000989	transcription factor activity, transcription factor binding	molecular_function	7	301	387	19765	ENSRNOG00000021614(Kmt2e),ENSRNOG00000005616(Ncoa3),ENSRNOG00000004300(Gtf2a1),ENSRNOG00000013166(Wnt4),ENSRNOG00000008065(Wwc1),ENSRNOG00000004730(Meis2),ENSRNOG00000015734(Ube3a),	1.18773	0.489354	1
GO:0007010	cytoskeleton organization	biological_process	17	301	940	19765	ENSRNOG00000019220(Rhod),ENSRNOG00000013166(Wnt4),ENSRNOG00000025406(Iqgap2),ENSRNOG00000004345(Daam1),ENSRNOG00000002215(Mylk),ENSRNOG00000025757(Myh6),ENSRNOG00000009184(Foxp1),ENSRNOG00000053230(Fopnl),ENSRNOG00000031162(Ccl24),ENSRNOG00000033101(Myo18a),ENSRNOG00000009571(Wipf3),ENSRNOG00000028946(Cdc42ep4),ENSRNOG00000059801(Lima1),ENSRNOG00000049695(Myh1),ENSRNOG00000000417(Numa1),ENSRNOG00…	1.18755	0.3974	1
GO:0046903	secretion	biological_process	16	301	885	19765	ENSRNOG00000019629(Lamp1),ENSRNOG00000000230(Lmf1),ENSRNOG00000049115(Ccr5),ENSRNOG00000000394(Srgn),ENSRNOG00000013171(Grm2),ENSRNOG00000001285(Atp2a2),ENSRNOG00000019318(Syt3),ENSRNOG00000047620(Golph3l),ENSRNOG00000002265(Casr),ENSRNOG00000059765(Asic1),ENSRNOG00000009184(Foxp1),ENSRNOG00000033101(Myo18a),ENSRNOG00000058940(Rab11fip1),ENSRNOG00000018901(Rab14),ENSRNOG00000018009(Rab8b),ENSRNOG…	1.18715	0.406776	1
GO:0009100	glycoprotein metabolic process	biological_process	5	301	277	19765	ENSRNOG00000012037(Galnt7),ENSRNOG00000000230(Lmf1),ENSRNOG00000014628(Pomk),ENSRNOG00000005234(Gxylt1),ENSRNOG00000004019(Phlda1),	1.18528	0.506628	1
GO:0045596	negative regulation of cell differentiation	biological_process	10	301	554	19765	ENSRNOG00000020482(Nfatc4),ENSRNOG00000004730(Meis2),ENSRNOG00000025111(Nfkbid),ENSRNOG00000032224(Hist1h4b),ENSRNOG00000049137(Zfp35),ENSRNOG00000013166(Wnt4),ENSRNOG00000049115(Ccr5),ENSRNOG00000009184(Foxp1),ENSRNOG00000005616(Ncoa3),ENSRNOG00000060320(Lin28a),	1.18528	0.465286	1
GO:0046649	lymphocyte activation	biological_process	9	301	499	19765	ENSRNOG00000049137(Zfp35),ENSRNOG00000009184(Foxp1),ENSRNOG00000025111(Nfkbid),ENSRNOG00000026762(RT1-DOa),ENSRNOG00000026702(Amica1),ENSRNOG00000017181(Malt1),ENSRNOG00000013166(Wnt4),ENSRNOG00000025222(Pcid2),ENSRNOG00000019629(Lamp1),	1.18433	0.476114	1
GO:0015630	microtubule cytoskeleton	cellular_component	16	301	891	19765	ENSRNOG00000028856(Pknox2),ENSRNOG00000025406(Iqgap2),ENSRNOG00000053230(Fopnl),ENSRNOG00000043204(Harbi1),ENSRNOG00000032929(Incenp),ENSRNOG00000014584(Odf2),ENSRNOG00000024450(Poc1b),ENSRNOG00000028946(Cdc42ep4),ENSRNOG00000027787(Cdc6),ENSRNOG00000000417(Numa1),ENSRNOG00000031916(Timeless),ENSRNOG00000024266(Haus5),ENSRNOG00000010999(Cep295),ENSRNOG00000038184(Camk2n2),ENSRNOG00000006082(Rmdn2…	1.17916	0.421392	1
GO:0022891	substrate-specific transmembrane transporter activity	molecular_function	15	301	836	19765	ENSRNOG00000020444(Hcn3),ENSRNOG00000045524(Slc39a3),ENSRNOG00000000457(Tap1),ENSRNOG00000005957(Slc4a7),ENSRNOG00000006639(Scn9a),ENSRNOG00000015741(Slc2a13),ENSRNOG00000001427(Orai2),ENSRNOG00000015746(Kcng4),ENSRNOG00000057221(Scn3b),ENSRNOG00000013610(Chrna5),ENSRNOG00000001285(Atp2a2),ENSRNOG00000052968(Hnrnpa3),ENSRNOG00000034161(Cox6b1),ENSRNOG00000059765(Asic1),ENSRNOG00000005491(Best3),	1.17819	0.431734	1
GO:0050793	regulation of developmental process	biological_process	35	301	1954	19765	ENSRNOG00000019692(Metrn),ENSRNOG00000049115(Ccr5),ENSRNOG00000008065(Wwc1),ENSRNOG00000009348(Nos3),ENSRNOG00000019318(Syt3),ENSRNOG00000060320(Lin28a),ENSRNOG00000025222(Pcid2),ENSRNOG00000009571(Wipf3),ENSRNOG00000004158(Hdac9),ENSRNOG00000016448(Eef2k),ENSRNOG00000036745(Gna13),ENSRNOG00000028946(Cdc42ep4),ENSRNOG00000026762(RT1-DOa),ENSRNOG00000025111(Nfkbid),ENSRNOG00000027434(Fitm2),ENSRNO…	1.17618	0.29799	1
GO:0002520	immune system development	biological_process	13	301	726	19765	ENSRNOG00000021614(Kmt2e),ENSRNOG00000009184(Foxp1),ENSRNOG00000013166(Wnt4),ENSRNOG00000017181(Malt1),ENSRNOG00000000308(Zbtb24),ENSRNOG00000026762(RT1-DOa),ENSRNOG00000025111(Nfkbid),ENSRNOG00000001050(Eif2ak1),ENSRNOG00000032224(Hist1h4b),ENSRNOG00000049137(Zfp35),ENSRNOG00000004730(Meis2),ENSRNOG00000038999(RT1-A1),ENSRNOG00000025222(Pcid2),	1.17581	0.453454	1
GO:0000988	transcription factor activity, protein binding	molecular_function	7	301	391	19765	ENSRNOG00000015734(Ube3a),ENSRNOG00000008065(Wwc1),ENSRNOG00000004730(Meis2),ENSRNOG00000013166(Wnt4),ENSRNOG00000004300(Gtf2a1),ENSRNOG00000005616(Ncoa3),ENSRNOG00000021614(Kmt2e),	1.17558	0.50585	1
GO:0007584	response to nutrient	biological_process	4	301	224	19765	ENSRNOG00000009826(Bche),ENSRNOG00000002265(Casr),ENSRNOG00000008022(Apaf1),ENSRNOG00000039859(Dnmt1),	1.17258	0.523116	1
GO:0010975	regulation of neuron projection development	biological_process	7	301	392	19765	ENSRNOG00000016448(Eef2k),ENSRNOG00000004276(Itga3),ENSRNOG00000019692(Metrn),ENSRNOG00000020482(Nfatc4),ENSRNOG00000049115(Ccr5),ENSRNOG00000015602(Cdh2),ENSRNOG00000019318(Syt3),	1.17258	0.510002	1
GO:0045893	positive regulation of transcription, DNA-templated	biological_process	22	301	1232	19765	ENSRNOG00000021614(Kmt2e),ENSRNOG00000009184(Foxp1),ENSRNOG00000025423(Map3k13),ENSRNOG00000054385(Rhebl1),ENSRNOG00000005616(Ncoa3),ENSRNOG00000024194(Rsf1),ENSRNOG00000002593(Esrrg),ENSRNOG00000009139(Fubp3),ENSRNOG00000032034(Supt5h),ENSRNOG00000054989(Grhl1),ENSRNOG00000000841(Ddx39b),ENSRNOG00000004730(Meis2),ENSRNOG00000020482(Nfatc4),ENSRNOG00000019653(Csrnp2),ENSRNOG00000007203(Psmc6),ENS…	1.17258	0.387297	1
GO:0051270	regulation of cellular component movement	biological_process	12	301	672	19765	ENSRNOG00000031162(Ccl24),ENSRNOG00000030118(Msn),ENSRNOG00000004158(Hdac9),ENSRNOG00000036745(Gna13),ENSRNOG00000016133(Sumo1),ENSRNOG00000049115(Ccr5),ENSRNOG00000004276(Itga3),ENSRNOG00000019629(Lamp1),ENSRNOG00000001285(Atp2a2),ENSRNOG00000019220(Rhod),ENSRNOG00000013166(Wnt4),ENSRNOG00000002215(Mylk),	1.17258	0.467853	1
GO:0048667	cell morphogenesis involved in neuron differentiation	biological_process	8	301	448	19765	ENSRNOG00000009184(Foxp1),ENSRNOG00000010649(Ctnnd2),ENSRNOG00000003261(Usp9x),ENSRNOG00000016448(Eef2k),ENSRNOG00000015602(Cdh2),ENSRNOG00000049115(Ccr5),ENSRNOG00000020482(Nfatc4),ENSRNOG00000019692(Metrn),	1.17258	0.502258	1
GO:0002684	positive regulation of immune system process	biological_process	11	301	616	19765	ENSRNOG00000025222(Pcid2),ENSRNOG00000038999(RT1-A1),ENSRNOG00000031162(Ccl24),ENSRNOG00000048932(Smagp),ENSRNOG00000011321(Rftn1),ENSRNOG00000003298(Cd247),ENSRNOG00000017181(Malt1),ENSRNOG00000019629(Lamp1),ENSRNOG00000012965(Themis2),ENSRNOG00000009184(Foxp1),ENSRNOG00000021614(Kmt2e),	1.17258	0.476604	1
GO:0005634	nucleus	cellular_component	93	301	5228	19765	ENSRNOG00000021555(Mis18a),ENSRNOG00000032034(Supt5h),ENSRNOG00000000934(Piwil1),ENSRNOG00000009826(Bche),ENSRNOG00000005256(Zc3h15),ENSRNOG00000030118(Msn),ENSRNOG00000004730(Meis2),ENSRNOG00000014584(Odf2),ENSRNOG00000002827(Rbfox1),ENSRNOG00000019817(Ddx28),ENSRNOG00000058561(Srrm2),ENSRNOG00000025757(Myh6),ENSRNOG00000001134(Rfc5),ENSRNOG00000024194(Rsf1),ENSRNOG00000019978(Parg),ENSRNOG00000…	1.16809	0.128878	1
GO:0007507	heart development	biological_process	9	301	507	19765	ENSRNOG00000001189(Sik1),ENSRNOG00000001453(Baz1b),ENSRNOG00000038720(Cdkl1),ENSRNOG00000025757(Myh6),ENSRNOG00000016983(Myh7),ENSRNOG00000009184(Foxp1),ENSRNOG00000020482(Nfatc4),ENSRNOG00000000841(Ddx39b),ENSRNOG00000004276(Itga3),	1.16564	0.504755	1
GO:0032259	methylation	biological_process	5	301	282	19765	ENSRNOG00000036918(Mettl20),ENSRNOG00000021614(Kmt2e),ENSRNOG00000021555(Mis18a),ENSRNOG00000039859(Dnmt1),ENSRNOG00000029064(Zcchc4),	1.16426	0.531656	1
GO:0010976	positive regulation of neuron projection development	biological_process	4	301	226	19765	ENSRNOG00000016448(Eef2k),ENSRNOG00000004276(Itga3),ENSRNOG00000019318(Syt3),ENSRNOG00000019692(Metrn),	1.1622	0.534438	1
GO:0016311	dephosphorylation	biological_process	7	301	396	19765	ENSRNOG00000022893(Rimbp2),ENSRNOG00000005711(Ptprd),ENSRNOG00000011820(Acpp),ENSRNOG00000019653(Csrnp2),ENSRNOG00000017600(Ptpn9),ENSRNOG00000011071(Nt5e),ENSRNOG00000052061(Ppef2),	1.16074	0.526711	1
GO:0005654	nucleoplasm	cellular_component	30	301	1698	19765	ENSRNOG00000011885(Rhpn2),ENSRNOG00000004158(Hdac9),ENSRNOG00000007887(Elk4),ENSRNOG00000008619(Agtrap),ENSRNOG00000051711(Kpna1),ENSRNOG00000027317(Ylpm1),ENSRNOG00000019830(Hsd17b1),ENSRNOG00000011975(Crtc3),ENSRNOG00000016983(Myh7),ENSRNOG00000006965(Aff4),ENSRNOG00000011663(Rnf7),ENSRNOG00000055408(Gcat),ENSRNOG00000008405(Taco1),ENSRNOG00000022939(Gpkow),ENSRNOG00000004300(Gtf2a1),ENSRNOG000…	1.16015	0.362886	1
GO:0006511	ubiquitin-dependent protein catabolic process	biological_process	8	301	453	19765	ENSRNOG00000007203(Psmc6),ENSRNOG00000025222(Pcid2),ENSRNOG00000003261(Usp9x),ENSRNOG00000005749(Foxred2),ENSRNOG00000015734(Ube3a),ENSRNOG00000001719(Psmd2),ENSRNOG00000011663(Rnf7),ENSRNOG00000016133(Sumo1),	1.15964	0.521618	1
GO:0043231	intracellular membrane-bounded organelle	cellular_component	149	301	8461	19765	ENSRNOG00000006965(Aff4),ENSRNOG00000019830(Hsd17b1),ENSRNOG00000000417(Numa1),ENSRNOG00000051711(Kpna1),ENSRNOG00000020751(Rdm1),ENSRNOG00000019630(Hacl1),ENSRNOG00000006462(Ero1l),ENSRNOG00000049115(Ccr5),ENSRNOG00000014935(Peo1),ENSRNOG00000000934(Piwil1),ENSRNOG00000011321(Rftn1),ENSRNOG00000018901(Rab14),ENSRNOG00000018009(Rab8b),ENSRNOG00000011226(Timm8a1),ENSRNOG00000014584(Odf2),ENSRNOG00…	1.15636	0.076286	1
GO:0000978	RNA polymerase II core promoter proximal region sequence-specific DNA binding	molecular_function	5	301	284	19765	ENSRNOG00000054989(Grhl1),ENSRNOG00000004730(Meis2),ENSRNOG00000020482(Nfatc4),ENSRNOG00000009184(Foxp1),ENSRNOG00000009139(Fubp3),	1.15606	0.541753	1
GO:0042060	wound healing	biological_process	6	301	341	19765	ENSRNOG00000002215(Mylk),ENSRNOG00000026702(Amica1),ENSRNOG00000050828(Vkorc1),ENSRNOG00000001811(Fgfr1op2),ENSRNOG00000013166(Wnt4),ENSRNOG00000036745(Gna13),	1.15539	0.539531	1
GO:0005509	calcium ion binding	molecular_function	11	301	626	19765	ENSRNOG00000002265(Casr),ENSRNOG00000032703(Rasgrp3),ENSRNOG00000019318(Syt3),ENSRNOG00000014409(Myl7),ENSRNOG00000001285(Atp2a2),ENSRNOG00000042201(Efcab2),ENSRNOG00000016632(Dsg3),ENSRNOG00000052061(Ppef2),ENSRNOG00000016448(Eef2k),ENSRNOG00000015602(Cdh2),ENSRNOG00000007744(Ehd3),	1.15385	0.508761	1
GO:0051050	positive regulation of transport	biological_process	14	301	798	19765	ENSRNOG00000049115(Ccr5),ENSRNOG00000057221(Scn3b),ENSRNOG00000019629(Lamp1),ENSRNOG00000047620(Golph3l),ENSRNOG00000002215(Mylk),ENSRNOG00000019318(Syt3),ENSRNOG00000002265(Casr),ENSRNOG00000015602(Cdh2),ENSRNOG00000033101(Myo18a),ENSRNOG00000018009(Rab8b),ENSRNOG00000030118(Msn),ENSRNOG00000016448(Eef2k),ENSRNOG00000016133(Sumo1),ENSRNOG00000021555(Mis18a),	1.15201	0.489318	1
GO:0005622	intracellular	cellular_component	209	301	11927	19765	ENSRNOG00000004585(Tmtc2),ENSRNOG00000025895(Sdpr),ENSRNOG00000001811(Fgfr1op2),ENSRNOG00000007744(Ehd3),ENSRNOG00000000457(Tap1),ENSRNOG00000005957(Slc4a7),ENSRNOG00000000956(Rasl11a),ENSRNOG00000046276(Myh3),ENSRNOG00000013557(Lancl1),ENSRNOG00000024266(Haus5),ENSRNOG00000009076(Ttpal),ENSRNOG00000014409(Myl7),ENSRNOG00000024178(Cenpt),ENSRNOG00000011071(Nt5e),ENSRNOG00000038720(Cdkl1),ENSRNOG0…	1.15066	0.0441098	1
GO:0000122	negative regulation of transcription from RNA polymerase II promoter	biological_process	11	301	628	19765	ENSRNOG00000027317(Ylpm1),ENSRNOG00000020482(Nfatc4),ENSRNOG00000021200(Hfe2),ENSRNOG00000007887(Elk4),ENSRNOG00000004158(Hdac9),ENSRNOG00000032034(Supt5h),ENSRNOG00000001189(Sik1),ENSRNOG00000031916(Timeless),ENSRNOG00000008065(Wwc1),ENSRNOG00000039859(Dnmt1),ENSRNOG00000009184(Foxp1),	1.15017	0.515284	1
GO:0002009	morphogenesis of an epithelium	biological_process	8	301	457	19765	ENSRNOG00000020482(Nfatc4),ENSRNOG00000036745(Gna13),ENSRNOG00000030118(Msn),ENSRNOG00000013166(Wnt4),ENSRNOG00000008022(Apaf1),ENSRNOG00000005616(Ncoa3),ENSRNOG00000002265(Casr),ENSRNOG00000031916(Timeless),	1.14949	0.537273	1
GO:0043227	membrane-bounded organelle	cellular_component	167	301	9541	19765	ENSRNOG00000019978(Parg),ENSRNOG00000001285(Atp2a2),ENSRNOG00000017383(l7Rn6),ENSRNOG00000001134(Rfc5),ENSRNOG00000034161(Cox6b1),ENSRNOG00000025757(Myh6),ENSRNOG00000019817(Ddx28),ENSRNOG00000058561(Srrm2),ENSRNOG00000004730(Meis2),ENSRNOG00000009826(Bche),ENSRNOG00000030118(Msn),ENSRNOG00000005256(Zc3h15),ENSRNOG00000032034(Supt5h),ENSRNOG00000021555(Mis18a),ENSRNOG00000009348(Nos3),ENSRNOG0000…	1.14935	0.0725008	1
GO:1901652	response to peptide	biological_process	7	301	400	19765	ENSRNOG00000027787(Cdc6),ENSRNOG00000002265(Casr),ENSRNOG00000004158(Hdac9),ENSRNOG00000001285(Atp2a2),ENSRNOG00000018009(Rab8b),ENSRNOG00000002011(Gnrhr),ENSRNOG00000016448(Eef2k),	1.14913	0.543579	1
GO:0048858	cell projection morphogenesis	biological_process	12	301	686	19765	ENSRNOG00000003261(Usp9x),ENSRNOG00000016448(Eef2k),ENSRNOG00000007744(Ehd3),ENSRNOG00000015602(Cdh2),ENSRNOG00000020482(Nfatc4),ENSRNOG00000010649(Ctnnd2),ENSRNOG00000049115(Ccr5),ENSRNOG00000019692(Metrn),ENSRNOG00000014584(Odf2),ENSRNOG00000024450(Poc1b),ENSRNOG00000009184(Foxp1),ENSRNOG00000019318(Syt3),	1.14865	0.51068	1
GO:0042277	peptide binding	molecular_function	4	301	229	19765	ENSRNOG00000013557(Lancl1),ENSRNOG00000038999(RT1-A1),ENSRNOG00000051711(Kpna1),ENSRNOG00000000457(Tap1),	1.14698	0.55152	1
GO:0005975	carbohydrate metabolic process	biological_process	11	301	632	19765	ENSRNOG00000014628(Pomk),ENSRNOG00000012037(Galnt7),ENSRNOG00000003063(Phka1),ENSRNOG00000005234(Gxylt1),ENSRNOG00000001189(Sik1),ENSRNOG00000016953(Chst4),ENSRNOG00000000230(Lmf1),ENSRNOG00000019978(Parg),ENSRNOG00000008064(Naga),ENSRNOG00000007023(Galm),ENSRNOG00000018326(Pgls),	1.14289	0.528416	1
GO:0034220	ion transmembrane transport	biological_process	16	301	920	19765	ENSRNOG00000005957(Slc4a7),ENSRNOG00000019208(P2rx5),ENSRNOG00000045524(Slc39a3),ENSRNOG00000020444(Hcn3),ENSRNOG00000016133(Sumo1),ENSRNOG00000006639(Scn9a),ENSRNOG00000057221(Scn3b),ENSRNOG00000015746(Kcng4),ENSRNOG00000001427(Orai2),ENSRNOG00000001285(Atp2a2),ENSRNOG00000013610(Chrna5),ENSRNOG00000006462(Ero1l),ENSRNOG00000005491(Best3),ENSRNOG00000059765(Asic1),ENSRNOG00000002265(Casr),ENSRNO…	1.14199	0.495229	1
GO:0019941	modification-dependent protein catabolic process	biological_process	8	301	460	19765	ENSRNOG00000003261(Usp9x),ENSRNOG00000007203(Psmc6),ENSRNOG00000025222(Pcid2),ENSRNOG00000015734(Ube3a),ENSRNOG00000005749(Foxred2),ENSRNOG00000016133(Sumo1),ENSRNOG00000001719(Psmd2),ENSRNOG00000011663(Rnf7),	1.14199	0.549105	1
GO:0016192	vesicle-mediated transport	biological_process	17	301	978	19765	ENSRNOG00000030118(Msn),ENSRNOG00000018009(Rab8b),ENSRNOG00000009571(Wipf3),ENSRNOG00000018901(Rab14),ENSRNOG00000058940(Rab11fip1),ENSRNOG00000016448(Eef2k),ENSRNOG00000003971(Gosr1),ENSRNOG00000026748(Dennd2a),ENSRNOG00000033101(Myo18a),ENSRNOG00000007744(Ehd3),ENSRNOG00000001050(Eif2ak1),ENSRNOG00000013674(Megf10),ENSRNOG00000001285(Atp2a2),ENSRNOG00000015734(Ube3a),ENSRNOG00000000230(Lmf1),EN…	1.14141	0.489611	1
GO:0016491	oxidoreductase activity	molecular_function	13	301	748	19765	ENSRNOG00000018574(Qsox2),ENSRNOG00000012264(Alkbh1),ENSRNOG00000006462(Ero1l),ENSRNOG00000003622(Cybb),ENSRNOG00000034161(Cox6b1),ENSRNOG00000050828(Vkorc1),ENSRNOG00000012436(Adh6),ENSRNOG00000009348(Nos3),ENSRNOG00000019830(Hsd17b1),ENSRNOG00000057934(Tmx1),ENSRNOG00000005749(Foxred2),ENSRNOG00000054724(Pycrl),ENSRNOG00000009620(Cybrd1),	1.14123	0.517682	1
GO:0010035	response to inorganic substance	biological_process	9	301	518	19765	ENSRNOG00000019830(Hsd17b1),ENSRNOG00000020482(Nfatc4),ENSRNOG00000016448(Eef2k),ENSRNOG00000009620(Cybrd1),ENSRNOG00000019318(Syt3),ENSRNOG00000011071(Nt5e),ENSRNOG00000002265(Casr),ENSRNOG00000039859(Dnmt1),ENSRNOG00000009348(Nos3),	1.14089	0.54505	1
GO:0006950	response to stress	biological_process	50	301	2879	19765	ENSRNOG00000039859(Dnmt1),ENSRNOG00000017181(Malt1),ENSRNOG00000007203(Psmc6),ENSRNOG00000026702(Amica1),ENSRNOG00000011071(Nt5e),ENSRNOG00000003622(Cybb),ENSRNOG00000001811(Fgfr1op2),ENSRNOG00000057934(Tmx1),ENSRNOG00000016448(Eef2k),ENSRNOG00000000457(Tap1),ENSRNOG00000018144(Depdc5),ENSRNOG00000001453(Baz1b),ENSRNOG00000001050(Eif2ak1),ENSRNOG00000013166(Wnt4),ENSRNOG00000012264(Alkbh1),ENSRNO…	1.1404	0.319072	1
GO:0043229	intracellular organelle	cellular_component	169	301	9754	19765	ENSRNOG00000038184(Camk2n2),ENSRNOG00000057934(Tmx1),ENSRNOG00000011885(Rhpn2),ENSRNOG00000004158(Hdac9),ENSRNOG00000016448(Eef2k),ENSRNOG00000017181(Malt1),ENSRNOG00000008064(Naga),ENSRNOG00000003622(Cybb),ENSRNOG00000010572(Pus7),ENSRNOG00000010999(Cep295),ENSRNOG00000007504(Actr10),ENSRNOG00000004300(Gtf2a1),ENSRNOG00000001187(Oasl),ENSRNOG00000049695(Myh1),ENSRNOG00000004019(Phlda1),ENSRNOG00…	1.13772	0.0928671	1
GO:0051649	establishment of localization in cell	biological_process	28	301	1617	19765	ENSRNOG00000000230(Lmf1),ENSRNOG00000015150(Spg7),ENSRNOG00000017383(l7Rn6),ENSRNOG00000019220(Rhod),ENSRNOG00000001285(Atp2a2),ENSRNOG00000018714(Arl5b),ENSRNOG00000059765(Asic1),ENSRNOG00000033101(Myo18a),ENSRNOG00000000841(Ddx39b),ENSRNOG00000015602(Cdh2),ENSRNOG00000010794(Dennd3),ENSRNOG00000018901(Rab14),ENSRNOG00000018009(Rab8b),ENSRNOG00000030118(Msn),ENSRNOG00000011321(Rftn1),ENSRNOG0000…	1.13705	0.431803	1
GO:0009165	nucleotide biosynthetic process	biological_process	5	301	289	19765	ENSRNOG00000011071(Nt5e),ENSRNOG00000052506(Ak3),ENSRNOG00000005193(Pfas),ENSRNOG00000056011(AC139950.1),ENSRNOG00000028814(Oasl2),	1.13606	0.567194	1
GO:0043547	positive regulation of GTPase activity	biological_process	6	301	347	19765	ENSRNOG00000028946(Cdc42ep4),ENSRNOG00000025406(Iqgap2),ENSRNOG00000032703(Rasgrp3),ENSRNOG00000013166(Wnt4),ENSRNOG00000014083(Iqsec3),ENSRNOG00000031162(Ccl24),	1.13541	0.567245	1
GO:0034765	regulation of ion transmembrane transport	biological_process	6	301	347	19765	ENSRNOG00000016133(Sumo1),ENSRNOG00000006639(Scn9a),ENSRNOG00000002265(Casr),ENSRNOG00000057221(Scn3b),ENSRNOG00000015746(Kcng4),ENSRNOG00000020444(Hcn3),	1.13541	0.567245	1
GO:0010468	regulation of gene expression	biological_process	56	301	3247	19765	ENSRNOG00000039859(Dnmt1),ENSRNOG00000008065(Wwc1),ENSRNOG00000007203(Psmc6),ENSRNOG00000017181(Malt1),ENSRNOG00000007408(Ebf4),ENSRNOG00000052023(AABR07002885.1),ENSRNOG00000027317(Ylpm1),ENSRNOG00000004158(Hdac9),ENSRNOG00000011859(Eif5a2),ENSRNOG00000007887(Elk4),ENSRNOG00000025222(Pcid2),ENSRNOG00000000956(Rasl11a),ENSRNOG00000001453(Baz1b),ENSRNOG00000048138(Zfp566),ENSRNOG00000001050(Eif2ak…	1.13249	0.320164	1
GO:0001525	angiogenesis	biological_process	6	301	348	19765	ENSRNOG00000004158(Hdac9),ENSRNOG00000009348(Nos3),ENSRNOG00000036745(Gna13),ENSRNOG00000020482(Nfatc4),ENSRNOG00000049115(Ccr5),ENSRNOG00000031162(Ccl24),	1.13215	0.571898	1
GO:0030133	transport vesicle	cellular_component	4	301	232	19765	ENSRNOG00000018009(Rab8b),ENSRNOG00000018901(Rab14),ENSRNOG00000048606(Vma21),ENSRNOG00000019629(Lamp1),	1.13215	0.568711	1
GO:0050900	leukocyte migration	biological_process	4	301	232	19765	ENSRNOG00000026702(Amica1),ENSRNOG00000031162(Ccl24),ENSRNOG00000049115(Ccr5),ENSRNOG00000030118(Msn),	1.13215	0.568711	1
GO:0001568	blood vessel development	biological_process	9	301	522	19765	ENSRNOG00000009348(Nos3),ENSRNOG00000013166(Wnt4),ENSRNOG00000049115(Ccr5),ENSRNOG00000002215(Mylk),ENSRNOG00000036745(Gna13),ENSRNOG00000004158(Hdac9),ENSRNOG00000031162(Ccl24),ENSRNOG00000015602(Cdh2),ENSRNOG00000020482(Nfatc4),	1.13215	0.559941	1
GO:0006810	transport	biological_process	65	301	3776	19765	ENSRNOG00000015741(Slc2a13),ENSRNOG00000051711(Kpna1),ENSRNOG00000026748(Dennd2a),ENSRNOG00000003971(Gosr1),ENSRNOG00000009783(Camk2g),ENSRNOG00000009571(Wipf3),ENSRNOG00000006462(Ero1l),ENSRNOG00000005491(Best3),ENSRNOG00000015734(Ube3a),ENSRNOG00000019629(Lamp1),ENSRNOG00000049115(Ccr5),ENSRNOG00000013610(Chrna5),ENSRNOG00000016655(Pex6),ENSRNOG00000009348(Nos3),ENSRNOG00000013171(Grm2),ENSRNOG…	1.13035	0.29688	1
GO:0044265	cellular macromolecule catabolic process	biological_process	12	301	698	19765	ENSRNOG00000005749(Foxred2),ENSRNOG00000030118(Msn),ENSRNOG00000025222(Pcid2),ENSRNOG00000003261(Usp9x),ENSRNOG00000010794(Dennd3),ENSRNOG00000011663(Rnf7),ENSRNOG00000001719(Psmd2),ENSRNOG00000016133(Sumo1),ENSRNOG00000015734(Ube3a),ENSRNOG00000007203(Psmc6),ENSRNOG00000008022(Apaf1),ENSRNOG00000060320(Lin28a),	1.1289	0.548463	1
GO:0031328	positive regulation of cellular biosynthetic process	biological_process	26	301	1513	19765	ENSRNOG00000007203(Psmc6),ENSRNOG00000017181(Malt1),ENSRNOG00000015734(Ube3a),ENSRNOG00000060320(Lin28a),ENSRNOG00000025222(Pcid2),ENSRNOG00000011859(Eif5a2),ENSRNOG00000007408(Ebf4),ENSRNOG00000011975(Crtc3),ENSRNOG00000000956(Rasl11a),ENSRNOG00000001453(Baz1b),ENSRNOG00000013166(Wnt4),ENSRNOG00000002593(Esrrg),ENSRNOG00000021614(Kmt2e),ENSRNOG00000009184(Foxp1),ENSRNOG00000025423(Map3k13),ENSRN…	1.1284	0.46563	1
GO:0070062	extracellular exosome	cellular_component	37	301	2156	19765	ENSRNOG00000038720(Cdkl1),ENSRNOG00000011071(Nt5e),ENSRNOG00000008064(Naga),ENSRNOG00000025406(Iqgap2),ENSRNOG00000001426(Prkrip1),ENSRNOG00000016632(Dsg3),ENSRNOG00000046276(Myh3),ENSRNOG00000013557(Lancl1),ENSRNOG00000036760(Tmc5),ENSRNOG00000047080(Gng4),ENSRNOG00000005616(Ncoa3),ENSRNOG00000008022(Apaf1),ENSRNOG00000033206(Entpd5),ENSRNOG00000004276(Itga3),ENSRNOG00000019212(Tpp1),ENSRNOG0000…	1.12689	0.414291	1
GO:0019725	cellular homeostasis	biological_process	12	301	700	19765	ENSRNOG00000001285(Atp2a2),ENSRNOG00000049115(Ccr5),ENSRNOG00000014935(Peo1),ENSRNOG00000002265(Casr),ENSRNOG00000051408(Magt1),ENSRNOG00000006462(Ero1l),ENSRNOG00000018574(Qsox2),ENSRNOG00000005957(Slc4a7),ENSRNOG00000021200(Hfe2),ENSRNOG00000036745(Gna13),ENSRNOG00000057934(Tmx1),ENSRNOG00000027434(Fitm2),	1.12568	0.554848	1
GO:0005215	transporter activity	molecular_function	20	301	1167	19765	ENSRNOG00000051711(Kpna1),ENSRNOG00000005957(Slc4a7),ENSRNOG00000000457(Tap1),ENSRNOG00000015741(Slc2a13),ENSRNOG00000009076(Ttpal),ENSRNOG00000001427(Orai2),ENSRNOG00000013610(Chrna5),ENSRNOG00000005491(Best3),ENSRNOG00000045524(Slc39a3),ENSRNOG00000020444(Hcn3),ENSRNOG00000006639(Scn9a),ENSRNOG00000015746(Kcng4),ENSRNOG00000057221(Scn3b),ENSRNOG00000017383(l7Rn6),ENSRNOG00000001285(Atp2a2),ENSR…	1.12535	0.507632	1
GO:0046483	heterocycle metabolic process	biological_process	77	301	4501	19765	ENSRNOG00000004730(Meis2),ENSRNOG00000003261(Usp9x),ENSRNOG00000032034(Supt5h),ENSRNOG00000000934(Piwil1),ENSRNOG00000021555(Mis18a),ENSRNOG00000009139(Fubp3),ENSRNOG00000001134(Rfc5),ENSRNOG00000024194(Rsf1),ENSRNOG00000028662(Zfp69),ENSRNOG00000002827(Rbfox1),ENSRNOG00000005193(Pfas),ENSRNOG00000019817(Ddx28),ENSRNOG00000025757(Myh6),ENSRNOG00000025360(Exd1),ENSRNOG00000026569(LOC102555377),ENS…	1.12334	0.284958	1
GO:0006351	transcription, DNA-templated	biological_process	47	301	2749	19765	ENSRNOG00000009139(Fubp3),ENSRNOG00000001189(Sik1),ENSRNOG00000032034(Supt5h),ENSRNOG00000021200(Hfe2),ENSRNOG00000003261(Usp9x),ENSRNOG00000020482(Nfatc4),ENSRNOG00000004730(Meis2),ENSRNOG00000009184(Foxp1),ENSRNOG00000025757(Myh6),ENSRNOG00000054385(Rhebl1),ENSRNOG00000025423(Map3k13),ENSRNOG00000028662(Zfp69),ENSRNOG00000024194(Rsf1),ENSRNOG00000016683(Zfp668),ENSRNOG00000002593(Esrrg),ENSRNOG…	1.12267	0.384702	1
GO:1901360	organic cyclic compound metabolic process	biological_process	80	301	4682	19765	ENSRNOG00000028856(Pknox2),ENSRNOG00000008022(Apaf1),ENSRNOG00000012264(Alkbh1),ENSRNOG00000021614(Kmt2e),ENSRNOG00000016825(Cd3eap),ENSRNOG00000013166(Wnt4),ENSRNOG00000016133(Sumo1),ENSRNOG00000031916(Timeless),ENSRNOG00000009250(Pts),ENSRNOG00000000841(Ddx39b),ENSRNOG00000019653(Csrnp2),ENSRNOG00000004300(Gtf2a1),ENSRNOG00000054989(Grhl1),ENSRNOG00000010572(Pus7),ENSRNOG00000011071(Nt5e),ENSRN…	1.12199	0.281625	1
GO:0042592	homeostatic process	biological_process	23	301	1347	19765	ENSRNOG00000006462(Ero1l),ENSRNOG00000024450(Poc1b),ENSRNOG00000014935(Peo1),ENSRNOG00000049115(Ccr5),ENSRNOG00000027434(Fitm2),ENSRNOG00000001050(Eif2ak1),ENSRNOG00000011975(Crtc3),ENSRNOG00000027317(Ylpm1),ENSRNOG00000004585(Tmtc2),ENSRNOG00000057934(Tmx1),ENSRNOG00000036745(Gna13),ENSRNOG00000000457(Tap1),ENSRNOG00000005957(Slc4a7),ENSRNOG00000018574(Qsox2),ENSRNOG00000051408(Magt1),ENSRNOG000…	1.12122	0.501076	1
GO:1903561	extracellular vesicle	cellular_component	37	301	2169	19765	ENSRNOG00000012037(Galnt7),ENSRNOG00000009620(Cybrd1),ENSRNOG00000020167(Reep5),ENSRNOG00000032224(Hist1h4b),ENSRNOG00000019212(Tpp1),ENSRNOG00000004276(Itga3),ENSRNOG00000033206(Entpd5),ENSRNOG00000005616(Ncoa3),ENSRNOG00000008022(Apaf1),ENSRNOG00000047080(Gng4),ENSRNOG00000013557(Lancl1),ENSRNOG00000046276(Myh3),ENSRNOG00000036760(Tmc5),ENSRNOG00000016632(Dsg3),ENSRNOG00000001426(Prkrip1),ENSRN…	1.12014	0.434603	1
GO:0051276	chromosome organization	biological_process	14	301	821	19765	ENSRNOG00000027317(Ylpm1),ENSRNOG00000004158(Hdac9),ENSRNOG00000007887(Elk4),ENSRNOG00000025222(Pcid2),ENSRNOG00000027787(Cdc6),ENSRNOG00000001453(Baz1b),ENSRNOG00000021555(Mis18a),ENSRNOG00000032224(Hist1h4b),ENSRNOG00000039859(Dnmt1),ENSRNOG00000014935(Peo1),ENSRNOG00000005616(Ncoa3),ENSRNOG00000024194(Rsf1),ENSRNOG00000024178(Cenpt),ENSRNOG00000021614(Kmt2e),	1.11973	0.555646	1
GO:0032990	cell part morphogenesis	biological_process	12	301	704	19765	ENSRNOG00000019692(Metrn),ENSRNOG00000049115(Ccr5),ENSRNOG00000019318(Syt3),ENSRNOG00000009184(Foxp1),ENSRNOG00000024450(Poc1b),ENSRNOG00000014584(Odf2),ENSRNOG00000020482(Nfatc4),ENSRNOG00000015602(Cdh2),ENSRNOG00000007744(Ehd3),ENSRNOG00000016448(Eef2k),ENSRNOG00000003261(Usp9x),ENSRNOG00000010649(Ctnnd2),	1.11928	0.567689	1
GO:0006164	purine nucleotide biosynthetic process	biological_process	4	301	235	19765	ENSRNOG00000011071(Nt5e),ENSRNOG00000052506(Ak3),ENSRNOG00000005193(Pfas),ENSRNOG00000028814(Oasl2),	1.11769	0.586001	1
GO:0002253	activation of immune response	biological_process	4	301	235	19765	ENSRNOG00000012965(Themis2),ENSRNOG00000011321(Rftn1),ENSRNOG00000003298(Cd247),ENSRNOG00000017181(Malt1),	1.11769	0.586001	1
GO:0015075	ion transmembrane transporter activity	molecular_function	13	301	765	19765	ENSRNOG00000034161(Cox6b1),ENSRNOG00000059765(Asic1),ENSRNOG00000005491(Best3),ENSRNOG00000057221(Scn3b),ENSRNOG00000015746(Kcng4),ENSRNOG00000001427(Orai2),ENSRNOG00000013610(Chrna5),ENSRNOG00000001285(Atp2a2),ENSRNOG00000006639(Scn9a),ENSRNOG00000015741(Slc2a13),ENSRNOG00000045524(Slc39a3),ENSRNOG00000020444(Hcn3),ENSRNOG00000005957(Slc4a7),	1.11587	0.569418	1
GO:0048856	anatomical structure development	biological_process	79	301	4660	19765	ENSRNOG00000013674(Megf10),ENSRNOG00000006639(Scn9a),ENSRNOG00000018700(Mobp),ENSRNOG00000001189(Sik1),ENSRNOG00000010649(Ctnnd2),ENSRNOG00000031162(Ccl24),ENSRNOG00000015602(Cdh2),ENSRNOG00000020482(Nfatc4),ENSRNOG00000009184(Foxp1),ENSRNOG00000002215(Mylk),ENSRNOG00000027434(Fitm2),ENSRNOG00000016983(Myh7),ENSRNOG00000025111(Nfkbid),ENSRNOG00000028946(Cdc42ep4),ENSRNOG00000009571(Wipf3),ENSRNOG…	1.1132	0.315438	1
GO:0051051	negative regulation of transport	biological_process	7	301	413	19765	ENSRNOG00000016133(Sumo1),ENSRNOG00000019727(Dph3),ENSRNOG00000059765(Asic1),ENSRNOG00000005491(Best3),ENSRNOG00000000394(Srgn),ENSRNOG00000009348(Nos3),ENSRNOG00000058940(Rab11fip1),	1.11296	0.599373	1
GO:0060341	regulation of cellular localization	biological_process	18	301	1063	19765	ENSRNOG00000021555(Mis18a),ENSRNOG00000019727(Dph3),ENSRNOG00000030118(Msn),ENSRNOG00000018009(Rab8b),ENSRNOG00000015602(Cdh2),ENSRNOG00000033101(Myo18a),ENSRNOG00000002265(Casr),ENSRNOG00000059765(Asic1),ENSRNOG00000047620(Golph3l),ENSRNOG00000001285(Atp2a2),ENSRNOG00000000394(Srgn),ENSRNOG00000004276(Itga3),ENSRNOG00000058940(Rab11fip1),ENSRNOG00000003971(Gosr1),ENSRNOG00000019318(Syt3),ENSRNOG…	1.11191	0.551815	1
GO:1902532	negative regulation of intracellular signal transduction	biological_process	6	301	355	19765	ENSRNOG00000004276(Itga3),ENSRNOG00000008065(Wwc1),ENSRNOG00000018144(Depdc5),ENSRNOG00000052061(Ppef2),ENSRNOG00000025111(Nfkbid),ENSRNOG00000011975(Crtc3),	1.10982	0.604706	1
GO:0051641	cellular localization	biological_process	39	301	2308	19765	ENSRNOG00000051711(Kpna1),ENSRNOG00000009571(Wipf3),ENSRNOG00000003971(Gosr1),ENSRNOG00000026748(Dennd2a),ENSRNOG00000000417(Numa1),ENSRNOG00000049115(Ccr5),ENSRNOG00000019629(Lamp1),ENSRNOG00000013171(Grm2),ENSRNOG00000016655(Pex6),ENSRNOG00000006462(Ero1l),ENSRNOG00000015602(Cdh2),ENSRNOG00000018901(Rab14),ENSRNOG00000018009(Rab8b),ENSRNOG00000030118(Msn),ENSRNOG00000010794(Dennd3),ENSRNOG00000…	1.10958	0.45952	1
GO:0006355	regulation of transcription, DNA-templated	biological_process	45	301	2664	19765	ENSRNOG00000026569(LOC102555377),ENSRNOG00000025111(Nfkbid),ENSRNOG00000011975(Crtc3),ENSRNOG00000015734(Ube3a),ENSRNOG00000000308(Zbtb24),ENSRNOG00000060320(Lin28a),ENSRNOG00000004730(Meis2),ENSRNOG00000020482(Nfatc4),ENSRNOG00000003261(Usp9x),ENSRNOG00000021200(Hfe2),ENSRNOG00000001189(Sik1),ENSRNOG00000032034(Supt5h),ENSRNOG00000009139(Fubp3),ENSRNOG00000002593(Esrrg),ENSRNOG00000016683(Zfp668…	1.1092	0.437125	1
GO:0032774	RNA biosynthetic process	biological_process	47	301	2786	19765	ENSRNOG00000004276(Itga3),ENSRNOG00000006925(Zfp786),ENSRNOG00000016825(Cd3eap),ENSRNOG00000028856(Pknox2),ENSRNOG00000005616(Ncoa3),ENSRNOG00000021614(Kmt2e),ENSRNOG00000019653(Csrnp2),ENSRNOG00000000841(Ddx39b),ENSRNOG00000054989(Grhl1),ENSRNOG00000004300(Gtf2a1),ENSRNOG00000016133(Sumo1),ENSRNOG00000031916(Timeless),ENSRNOG00000008065(Wwc1),ENSRNOG00000039859(Dnmt1),ENSRNOG00000017181(Malt1),E…	1.10776	0.434616	1
GO:0030335	positive regulation of cell migration	biological_process	6	301	356	19765	ENSRNOG00000004158(Hdac9),ENSRNOG00000019220(Rhod),ENSRNOG00000049115(Ccr5),ENSRNOG00000031162(Ccl24),ENSRNOG00000004276(Itga3),ENSRNOG00000002215(Mylk),	1.1067	0.609425	1
GO:0008104	protein localization	biological_process	32	301	1900	19765	ENSRNOG00000000956(Rasl11a),ENSRNOG00000058940(Rab11fip1),ENSRNOG00000003971(Gosr1),ENSRNOG00000000457(Tap1),ENSRNOG00000007744(Ehd3),ENSRNOG00000051711(Kpna1),ENSRNOG00000016655(Pex6),ENSRNOG00000019629(Lamp1),ENSRNOG00000049115(Ccr5),ENSRNOG00000021555(Mis18a),ENSRNOG00000016133(Sumo1),ENSRNOG00000019727(Dph3),ENSRNOG00000011321(Rftn1),ENSRNOG00000018009(Rab8b),ENSRNOG00000030118(Msn),ENSRNOG00…	1.10593	0.500924	1
GO:0050801	ion homeostasis	biological_process	10	301	595	19765	ENSRNOG00000001050(Eif2ak1),ENSRNOG00000004585(Tmtc2),ENSRNOG00000036745(Gna13),ENSRNOG00000021200(Hfe2),ENSRNOG00000005957(Slc4a7),ENSRNOG00000006462(Ero1l),ENSRNOG00000002265(Casr),ENSRNOG00000049115(Ccr5),ENSRNOG00000057221(Scn3b),ENSRNOG00000001285(Atp2a2),	1.1036	0.607887	1
GO:1903506	regulation of nucleic acid-templated transcription	biological_process	45	301	2685	19765	ENSRNOG00000048138(Zfp566),ENSRNOG00000001453(Baz1b),ENSRNOG00000000956(Rasl11a),ENSRNOG00000025222(Pcid2),ENSRNOG00000007887(Elk4),ENSRNOG00000004158(Hdac9),ENSRNOG00000027317(Ylpm1),ENSRNOG00000007408(Ebf4),ENSRNOG00000052023(AABR07002885.1),ENSRNOG00000017181(Malt1),ENSRNOG00000007203(Psmc6),ENSRNOG00000008065(Wwc1),ENSRNOG00000039859(Dnmt1),ENSRNOG00000031916(Timeless),ENSRNOG00000016133(Sumo…	1.10052	0.467622	1
GO:0007275	multicellular organism development	biological_process	70	301	4181	19765	ENSRNOG00000025111(Nfkbid),ENSRNOG00000016983(Myh7),ENSRNOG00000009783(Camk2g),ENSRNOG00000009571(Wipf3),ENSRNOG00000015734(Ube3a),ENSRNOG00000010649(Ctnnd2),ENSRNOG00000018700(Mobp),ENSRNOG00000001189(Sik1),ENSRNOG00000006639(Scn9a),ENSRNOG00000013674(Megf10),ENSRNOG00000031162(Ccl24),ENSRNOG00000015602(Cdh2),ENSRNOG00000020482(Nfatc4),ENSRNOG00000002215(Mylk),ENSRNOG00000009184(Foxp1),ENSRNOG00…	1.09938	0.393335	1
GO:2001141	regulation of RNA biosynthetic process	biological_process	45	301	2691	19765	ENSRNOG00000000308(Zbtb24),ENSRNOG00000015734(Ube3a),ENSRNOG00000060320(Lin28a),ENSRNOG00000011975(Crtc3),ENSRNOG00000025111(Nfkbid),ENSRNOG00000026569(LOC102555377),ENSRNOG00000016683(Zfp668),ENSRNOG00000002593(Esrrg),ENSRNOG00000009184(Foxp1),ENSRNOG00000025757(Myh6),ENSRNOG00000054385(Rhebl1),ENSRNOG00000025423(Map3k13),ENSRNOG00000028662(Zfp69),ENSRNOG00000024194(Rsf1),ENSRNOG00000021200(Hfe2…	1.09807	0.476517	1
GO:0006139	nucleobase-containing compound metabolic process	biological_process	73	301	4372	19765	ENSRNOG00000009184(Foxp1),ENSRNOG00000025423(Map3k13),ENSRNOG00000054385(Rhebl1),ENSRNOG00000016683(Zfp668),ENSRNOG00000020658(Aarsd1),ENSRNOG00000002593(Esrrg),ENSRNOG00000052506(Ak3),ENSRNOG00000001189(Sik1),ENSRNOG00000021200(Hfe2),ENSRNOG00000020482(Nfatc4),ENSRNOG00000007629(Sf3a3),ENSRNOG00000018326(Pgls),ENSRNOG00000011820(Acpp),ENSRNOG00000015734(Ube3a),ENSRNOG00000016983(Myh7),ENSRNOG000…	1.09641	0.397506	1
GO:0003676	nucleic acid binding	molecular_function	60	301	3598	19765	ENSRNOG00000031544(Larp1),ENSRNOG00000009139(Fubp3),ENSRNOG00000000934(Piwil1),ENSRNOG00000032034(Supt5h),ENSRNOG00000011321(Rftn1),ENSRNOG00000030118(Msn),ENSRNOG00000007629(Sf3a3),ENSRNOG00000004730(Meis2),ENSRNOG00000020482(Nfatc4),ENSRNOG00000002827(Rbfox1),ENSRNOG00000009184(Foxp1),ENSRNOG00000019817(Ddx28),ENSRNOG00000058561(Srrm2),ENSRNOG00000001134(Rfc5),ENSRNOG00000028662(Zfp69),ENSRNOG0…	1.09502	0.439657	1
GO:0046907	intracellular transport	biological_process	24	301	1440	19765	ENSRNOG00000017181(Malt1),ENSRNOG00000016655(Pex6),ENSRNOG00000019629(Lamp1),ENSRNOG00000019318(Syt3),ENSRNOG00000006462(Ero1l),ENSRNOG00000026748(Dennd2a),ENSRNOG00000003971(Gosr1),ENSRNOG00000000457(Tap1),ENSRNOG00000007744(Ehd3),ENSRNOG00000051711(Kpna1),ENSRNOG00000001285(Atp2a2),ENSRNOG00000019220(Rhod),ENSRNOG00000017383(l7Rn6),ENSRNOG00000000230(Lmf1),ENSRNOG00000015150(Spg7),ENSRNOG000000…	1.09441	0.57068	1
GO:0010769	regulation of cell morphogenesis involved in differentiation	biological_process	5	301	300	19765	ENSRNOG00000019692(Metrn),ENSRNOG00000015602(Cdh2),ENSRNOG00000049115(Ccr5),ENSRNOG00000020482(Nfatc4),ENSRNOG00000016448(Eef2k),	1.09441	0.624006	1
GO:0036477	somatodendritic compartment	cellular_component	11	301	660	19765	ENSRNOG00000006462(Ero1l),ENSRNOG00000002265(Casr),ENSRNOG00000039859(Dnmt1),ENSRNOG00000019629(Lamp1),ENSRNOG00000014409(Myl7),ENSRNOG00000013171(Grm2),ENSRNOG00000013610(Chrna5),ENSRNOG00000016133(Sumo1),ENSRNOG00000010649(Ctnnd2),ENSRNOG00000000417(Numa1),ENSRNOG00000020444(Hcn3),	1.09441	0.62319	1
GO:0051171	regulation of nitrogen compound metabolic process	biological_process	55	301	3301	19765	ENSRNOG00000054989(Grhl1),ENSRNOG00000004300(Gtf2a1),ENSRNOG00000019653(Csrnp2),ENSRNOG00000000841(Ddx39b),ENSRNOG00000031916(Timeless),ENSRNOG00000016133(Sumo1),ENSRNOG00000004276(Itga3),ENSRNOG00000006925(Zfp786),ENSRNOG00000026466(Lrrtm3),ENSRNOG00000001073(RGD1563482),ENSRNOG00000021614(Kmt2e),ENSRNOG00000028856(Pknox2),ENSRNOG00000005616(Ncoa3),ENSRNOG00000008022(Apaf1),ENSRNOG00000025222(Pc…	1.09408	0.458594	1
GO:0032270	positive regulation of cellular protein metabolic process	biological_process	19	301	1142	19765	ENSRNOG00000008065(Wwc1),ENSRNOG00000039859(Dnmt1),ENSRNOG00000015734(Ube3a),ENSRNOG00000007203(Psmc6),ENSRNOG00000002255(Fam162a),ENSRNOG00000020377(Cideb),ENSRNOG00000017181(Malt1),ENSRNOG00000060320(Lin28a),ENSRNOG00000011859(Eif5a2),ENSRNOG00000027787(Cdc6),ENSRNOG00000008022(Apaf1),ENSRNOG00000012818(Ksr1),ENSRNOG00000025423(Map3k13),ENSRNOG00000015602(Cdh2),ENSRNOG00000000841(Ddx39b),ENSRNO…	1.09249	0.597054	1
GO:0071407	cellular response to organic cyclic compound	biological_process	8	301	481	19765	ENSRNOG00000015734(Ube3a),ENSRNOG00000002593(Esrrg),ENSRNOG00000030118(Msn),ENSRNOG00000020444(Hcn3),ENSRNOG00000016448(Eef2k),ENSRNOG00000005616(Ncoa3),ENSRNOG00000060320(Lin28a),ENSRNOG00000002265(Casr),	1.09213	0.633817	1
GO:0035556	intracellular signal transduction	biological_process	34	301	2046	19765	ENSRNOG00000025111(Nfkbid),ENSRNOG00000011975(Crtc3),ENSRNOG00000028946(Cdc42ep4),ENSRNOG00000000956(Rasl11a),ENSRNOG00000018144(Depdc5),ENSRNOG00000036745(Gna13),ENSRNOG00000014265(Tnfrsf19),ENSRNOG00000025406(Iqgap2),ENSRNOG00000006462(Ero1l),ENSRNOG00000032703(Rasgrp3),ENSRNOG00000014083(Iqsec3),ENSRNOG00000017181(Malt1),ENSRNOG00000008065(Wwc1),ENSRNOG00000015734(Ube3a),ENSRNOG00000031544(Lar…	1.0912	0.541081	1
GO:0008544	epidermis development	biological_process	4	301	241	19765	ENSRNOG00000014265(Tnfrsf19),ENSRNOG00000005957(Slc4a7),ENSRNOG00000054989(Grhl1),ENSRNOG00000005616(Ncoa3),	1.08987	0.620834	1
GO:0055085	transmembrane transport	biological_process	20	301	1205	19765	ENSRNOG00000001285(Atp2a2),ENSRNOG00000015746(Kcng4),ENSRNOG00000057221(Scn3b),ENSRNOG00000002265(Casr),ENSRNOG00000059765(Asic1),ENSRNOG00000034161(Cox6b1),ENSRNOG00000018009(Rab8b),ENSRNOG00000045524(Slc39a3),ENSRNOG00000020444(Hcn3),ENSRNOG00000006639(Scn9a),ENSRNOG00000016133(Sumo1),ENSRNOG00000016655(Pex6),ENSRNOG00000013610(Chrna5),ENSRNOG00000001427(Orai2),ENSRNOG00000005491(Best3),ENSRNOG…	1.08987	0.600149	1
GO:0016570	histone modification	biological_process	6	301	362	19765	ENSRNOG00000021614(Kmt2e),ENSRNOG00000005616(Ncoa3),ENSRNOG00000001453(Baz1b),ENSRNOG00000007887(Elk4),ENSRNOG00000004158(Hdac9),ENSRNOG00000039859(Dnmt1),	1.08836	0.637883	1
GO:0030030	cell projection organization	biological_process	18	301	1086	19765	ENSRNOG00000059801(Lima1),ENSRNOG00000028946(Cdc42ep4),ENSRNOG00000016448(Eef2k),ENSRNOG00000007744(Ehd3),ENSRNOG00000024450(Poc1b),ENSRNOG00000019318(Syt3),ENSRNOG00000019692(Metrn),ENSRNOG00000049115(Ccr5),ENSRNOG00000010649(Ctnnd2),ENSRNOG00000018009(Rab8b),ENSRNOG00000003261(Usp9x),ENSRNOG00000020482(Nfatc4),ENSRNOG00000015602(Cdh2),ENSRNOG00000009184(Foxp1),ENSRNOG00000014584(Odf2),ENSRNOG00…	1.08836	0.612078	1
GO:0043434	response to peptide hormone	biological_process	6	301	362	19765	ENSRNOG00000018009(Rab8b),ENSRNOG00000001285(Atp2a2),ENSRNOG00000004158(Hdac9),ENSRNOG00000002011(Gnrhr),ENSRNOG00000016448(Eef2k),ENSRNOG00000027787(Cdc6),	1.08836	0.637883	1
GO:0006725	cellular aromatic compound metabolic process	biological_process	75	301	4528	19765	ENSRNOG00000000308(Zbtb24),ENSRNOG00000014935(Peo1),ENSRNOG00000039829(Rpp14),ENSRNOG00000060320(Lin28a),ENSRNOG00000020751(Rdm1),ENSRNOG00000025360(Exd1),ENSRNOG00000011975(Crtc3),ENSRNOG00000026569(LOC102555377),ENSRNOG00000002827(Rbfox1),ENSRNOG00000019817(Ddx28),ENSRNOG00000005193(Pfas),ENSRNOG00000025757(Myh6),ENSRNOG00000024194(Rsf1),ENSRNOG00000001134(Rfc5),ENSRNOG00000028662(Zfp69),ENSRNO…	1.08764	0.430483	1
GO:0005768	endosome	cellular_component	9	301	544	19765	ENSRNOG00000011321(Rftn1),ENSRNOG00000058940(Rab11fip1),ENSRNOG00000018009(Rab8b),ENSRNOG00000018901(Rab14),ENSRNOG00000007744(Ehd3),ENSRNOG00000019318(Syt3),ENSRNOG00000019629(Lamp1),ENSRNOG00000011820(Acpp),ENSRNOG00000049115(Ccr5),	1.08636	0.643739	1
GO:0042063	gliogenesis	biological_process	4	301	242	19765	ENSRNOG00000060320(Lin28a),ENSRNOG00000049115(Ccr5),ENSRNOG00000015602(Cdh2),ENSRNOG00000019692(Metrn),	1.08536	0.626668	1
GO:0043065	positive regulation of apoptotic process	biological_process	8	301	484	19765	ENSRNOG00000002255(Fam162a),ENSRNOG00000020377(Cideb),ENSRNOG00000020482(Nfatc4),ENSRNOG00000049115(Ccr5),ENSRNOG00000025111(Nfkbid),ENSRNOG00000002866(Rassf6),ENSRNOG00000008022(Apaf1),ENSRNOG00000004019(Phlda1),	1.08536	0.646146	1
GO:0006807	nitrogen compound metabolic process	biological_process	92	301	5567	19765	ENSRNOG00000046276(Myh3),ENSRNOG00000000956(Rasl11a),ENSRNOG00000001050(Eif2ak1),ENSRNOG00000054724(Pycrl),ENSRNOG00000011859(Eif5a2),ENSRNOG00000028814(Oasl2),ENSRNOG00000004158(Hdac9),ENSRNOG00000025222(Pcid2),ENSRNOG00000011071(Nt5e),ENSRNOG00000010572(Pus7),ENSRNOG00000008064(Naga),ENSRNOG00000017181(Malt1),ENSRNOG00000016133(Sumo1),ENSRNOG00000031916(Timeless),ENSRNOG00000019653(Csrnp2),ENSR…	1.08517	0.402914	1
GO:0009893	positive regulation of metabolic process	biological_process	48	301	2905	19765	ENSRNOG00000007408(Ebf4),ENSRNOG00000025222(Pcid2),ENSRNOG00000011859(Eif5a2),ENSRNOG00000001453(Baz1b),ENSRNOG00000000956(Rasl11a),ENSRNOG00000039859(Dnmt1),ENSRNOG00000008065(Wwc1),ENSRNOG00000017181(Malt1),ENSRNOG00000020377(Cideb),ENSRNOG00000007203(Psmc6),ENSRNOG00000014083(Iqsec3),ENSRNOG00000011071(Nt5e),ENSRNOG00000025406(Iqgap2),ENSRNOG00000032703(Rasgrp3),ENSRNOG00000019653(Csrnp2),ENSR…	1.08499	0.516548	1
GO:0006397	mRNA processing	biological_process	5	301	303	19765	ENSRNOG00000000841(Ddx39b),ENSRNOG00000007629(Sf3a3),ENSRNOG00000052968(Hnrnpa3),ENSRNOG00000032034(Supt5h),ENSRNOG00000002827(Rbfox1),	1.08357	0.639664	1
GO:0006470	protein dephosphorylation	biological_process	5	301	303	19765	ENSRNOG00000005711(Ptprd),ENSRNOG00000022893(Rimbp2),ENSRNOG00000019653(Csrnp2),ENSRNOG00000017600(Ptpn9),ENSRNOG00000052061(Ppef2),	1.08357	0.639664	1
GO:0016568	chromatin modification	biological_process	8	301	485	19765	ENSRNOG00000007887(Elk4),ENSRNOG00000004158(Hdac9),ENSRNOG00000039859(Dnmt1),ENSRNOG00000021555(Mis18a),ENSRNOG00000021614(Kmt2e),ENSRNOG00000001453(Baz1b),ENSRNOG00000024194(Rsf1),ENSRNOG00000005616(Ncoa3),	1.08312	0.650266	1
GO:0006366	transcription from RNA polymerase II promoter	biological_process	26	301	1577	19765	ENSRNOG00000054989(Grhl1),ENSRNOG00000021200(Hfe2),ENSRNOG00000003261(Usp9x),ENSRNOG00000004300(Gtf2a1),ENSRNOG00000019653(Csrnp2),ENSRNOG00000004730(Meis2),ENSRNOG00000020482(Nfatc4),ENSRNOG00000031916(Timeless),ENSRNOG00000009139(Fubp3),ENSRNOG00000032034(Supt5h),ENSRNOG00000001189(Sik1),ENSRNOG00000004276(Itga3),ENSRNOG00000002593(Esrrg),ENSRNOG00000009184(Foxp1),ENSRNOG00000025757(Myh6),ENSRN…	1.08261	0.598999	1
GO:2000147	positive regulation of cell motility	biological_process	6	301	364	19765	ENSRNOG00000004158(Hdac9),ENSRNOG00000019220(Rhod),ENSRNOG00000049115(Ccr5),ENSRNOG00000031162(Ccl24),ENSRNOG00000004276(Itga3),ENSRNOG00000002215(Mylk),	1.08238	0.647421	1
GO:0051252	regulation of RNA metabolic process	biological_process	46	301	2791	19765	ENSRNOG00000004300(Gtf2a1),ENSRNOG00000054989(Grhl1),ENSRNOG00000000841(Ddx39b),ENSRNOG00000019653(Csrnp2),ENSRNOG00000031916(Timeless),ENSRNOG00000016133(Sumo1),ENSRNOG00000006925(Zfp786),ENSRNOG00000004276(Itga3),ENSRNOG00000021614(Kmt2e),ENSRNOG00000005616(Ncoa3),ENSRNOG00000028856(Pknox2),ENSRNOG00000007887(Elk4),ENSRNOG00000004158(Hdac9),ENSRNOG00000025222(Pcid2),ENSRNOG00000052023(AABR07002…	1.08225	0.533629	1
GO:0006811	ion transport	biological_process	22	301	1336	19765	ENSRNOG00000020444(Hcn3),ENSRNOG00000045524(Slc39a3),ENSRNOG00000016133(Sumo1),ENSRNOG00000001189(Sik1),ENSRNOG00000006639(Scn9a),ENSRNOG00000015746(Kcng4),ENSRNOG00000057221(Scn3b),ENSRNOG00000001285(Atp2a2),ENSRNOG00000002215(Mylk),ENSRNOG00000002265(Casr),ENSRNOG00000059765(Asic1),ENSRNOG00000034161(Cox6b1),ENSRNOG00000009783(Camk2g),ENSRNOG00000005957(Slc4a7),ENSRNOG00000019208(P2rx5),ENSRNOG…	1.0813	0.617229	1
GO:0016604	nuclear body	cellular_component	4	301	243	19765	ENSRNOG00000000841(Ddx39b),ENSRNOG00000017157(Trim69),ENSRNOG00000016133(Sumo1),ENSRNOG00000058561(Srrm2),	1.0809	0.632509	1
GO:0000987	core promoter proximal region sequence-specific DNA binding	molecular_function	5	301	304	19765	ENSRNOG00000020482(Nfatc4),ENSRNOG00000004730(Meis2),ENSRNOG00000054989(Grhl1),ENSRNOG00000009184(Foxp1),ENSRNOG00000009139(Fubp3),	1.08001	0.644896	1
GO:0009058	biosynthetic process	biological_process	82	301	4987	19765	ENSRNOG00000017181(Malt1),ENSRNOG00000011071(Nt5e),ENSRNOG00000003622(Cybb),ENSRNOG00000054724(Pycrl),ENSRNOG00000011859(Eif5a2),ENSRNOG00000028814(Oasl2),ENSRNOG00000004158(Hdac9),ENSRNOG00000025222(Pcid2),ENSRNOG00000000956(Rasl11a),ENSRNOG00000001050(Eif2ak1),ENSRNOG00000016825(Cd3eap),ENSRNOG00000013166(Wnt4),ENSRNOG00000036866(Acer3),ENSRNOG00000028856(Pknox2),ENSRNOG00000001073(RGD1563482),…	1.0797	0.451235	1
GO:0005694	chromosome	cellular_component	12	301	730	19765	ENSRNOG00000016133(Sumo1),ENSRNOG00000001453(Baz1b),ENSRNOG00000031916(Timeless),ENSRNOG00000021555(Mis18a),ENSRNOG00000032224(Hist1h4b),ENSRNOG00000006965(Aff4),ENSRNOG00000039859(Dnmt1),ENSRNOG00000015787(P3h4),ENSRNOG00000005616(Ncoa3),ENSRNOG00000024178(Cenpt),ENSRNOG00000001134(Rfc5),ENSRNOG00000032929(Incenp),	1.07942	0.653182	1
GO:0022857	transmembrane transporter activity	molecular_function	15	301	914	19765	ENSRNOG00000059765(Asic1),ENSRNOG00000034161(Cox6b1),ENSRNOG00000005491(Best3),ENSRNOG00000052968(Hnrnpa3),ENSRNOG00000013610(Chrna5),ENSRNOG00000001285(Atp2a2),ENSRNOG00000057221(Scn3b),ENSRNOG00000015746(Kcng4),ENSRNOG00000001427(Orai2),ENSRNOG00000006639(Scn9a),ENSRNOG00000015741(Slc2a13),ENSRNOG00000045524(Slc39a3),ENSRNOG00000020444(Hcn3),ENSRNOG00000005957(Slc4a7),ENSRNOG00000000457(Tap1),	1.07764	0.649924	1
GO:0048513	animal organ development	biological_process	48	301	2933	19765	ENSRNOG00000026762(RT1-DOa),ENSRNOG00000001453(Baz1b),ENSRNOG00000001050(Eif2ak1),ENSRNOG00000005957(Slc4a7),ENSRNOG00000025222(Pcid2),ENSRNOG00000011071(Nt5e),ENSRNOG00000038720(Cdkl1),ENSRNOG00000014265(Tnfrsf19),ENSRNOG00000039859(Dnmt1),ENSRNOG00000017181(Malt1),ENSRNOG00000004019(Phlda1),ENSRNOG00000032224(Hist1h4b),ENSRNOG00000031916(Timeless),ENSRNOG00000000841(Ddx39b),ENSRNOG00000045524(S…	1.07463	0.559071	1
GO:0043068	positive regulation of programmed cell death	biological_process	8	301	489	19765	ENSRNOG00000049115(Ccr5),ENSRNOG00000020482(Nfatc4),ENSRNOG00000002255(Fam162a),ENSRNOG00000020377(Cideb),ENSRNOG00000004019(Phlda1),ENSRNOG00000008022(Apaf1),ENSRNOG00000002866(Rassf6),ENSRNOG00000025111(Nfkbid),	1.07427	0.666795	1
GO:0010243	response to organonitrogen compound	biological_process	13	301	795	19765	ENSRNOG00000020444(Hcn3),ENSRNOG00000016448(Eef2k),ENSRNOG00000009826(Bche),ENSRNOG00000018009(Rab8b),ENSRNOG00000019208(P2rx5),ENSRNOG00000004158(Hdac9),ENSRNOG00000027787(Cdc6),ENSRNOG00000039859(Dnmt1),ENSRNOG00000002011(Gnrhr),ENSRNOG00000013610(Chrna5),ENSRNOG00000001285(Atp2a2),ENSRNOG00000002265(Casr),ENSRNOG00000050828(Vkorc1),	1.07376	0.664268	1
GO:0006357	regulation of transcription from RNA polymerase II promoter	biological_process	25	301	1529	19765	ENSRNOG00000001189(Sik1),ENSRNOG00000032034(Supt5h),ENSRNOG00000031916(Timeless),ENSRNOG00000009139(Fubp3),ENSRNOG00000020482(Nfatc4),ENSRNOG00000004730(Meis2),ENSRNOG00000019653(Csrnp2),ENSRNOG00000021200(Hfe2),ENSRNOG00000054989(Grhl1),ENSRNOG00000003261(Usp9x),ENSRNOG00000005616(Ncoa3),ENSRNOG00000028856(Pknox2),ENSRNOG00000009184(Foxp1),ENSRNOG00000025757(Myh6),ENSRNOG00000004276(Itga3),ENSRN…	1.07365	0.631032	1
GO:0001159	core promoter proximal region DNA binding	molecular_function	5	301	306	19765	ENSRNOG00000009184(Foxp1),ENSRNOG00000009139(Fubp3),ENSRNOG00000054989(Grhl1),ENSRNOG00000004730(Meis2),ENSRNOG00000020482(Nfatc4),	1.07295	0.655379	1
GO:0005543	phospholipid binding	molecular_function	5	301	306	19765	ENSRNOG00000047620(Golph3l),ENSRNOG00000025406(Iqgap2),ENSRNOG00000019318(Syt3),ENSRNOG00000038365(Plekha2),ENSRNOG00000025895(Sdpr),	1.07295	0.655379	1
GO:0016055	Wnt signaling pathway	biological_process	5	301	306	19765	ENSRNOG00000010649(Ctnnd2),ENSRNOG00000025757(Myh6),ENSRNOG00000015602(Cdh2),ENSRNOG00000004276(Itga3),ENSRNOG00000013166(Wnt4),	1.07295	0.655379	1
GO:0016070	RNA metabolic process	biological_process	56	301	3430	19765	ENSRNOG00000054989(Grhl1),ENSRNOG00000004300(Gtf2a1),ENSRNOG00000019653(Csrnp2),ENSRNOG00000000841(Ddx39b),ENSRNOG00000031916(Timeless),ENSRNOG00000016133(Sumo1),ENSRNOG00000004276(Itga3),ENSRNOG00000006925(Zfp786),ENSRNOG00000016825(Cd3eap),ENSRNOG00000021614(Kmt2e),ENSRNOG00000012264(Alkbh1),ENSRNOG00000028856(Pknox2),ENSRNOG00000005616(Ncoa3),ENSRNOG00000052968(Hnrnpa3),ENSRNOG00000025222(Pcid…	1.07207	0.549159	1
GO:0097190	apoptotic signaling pathway	biological_process	8	301	490	19765	ENSRNOG00000008022(Apaf1),ENSRNOG00000006462(Ero1l),ENSRNOG00000019629(Lamp1),ENSRNOG00000020482(Nfatc4),ENSRNOG00000000394(Srgn),ENSRNOG00000020377(Cideb),ENSRNOG00000002255(Fam162a),ENSRNOG00000013166(Wnt4),	1.07207	0.670939	1
GO:0032502	developmental process	biological_process	81	301	4964	19765	ENSRNOG00000009184(Foxp1),ENSRNOG00000002215(Mylk),ENSRNOG00000015602(Cdh2),ENSRNOG00000031162(Ccl24),ENSRNOG00000020482(Nfatc4),ENSRNOG00000013674(Megf10),ENSRNOG00000006639(Scn9a),ENSRNOG00000018700(Mobp),ENSRNOG00000001189(Sik1),ENSRNOG00000010649(Ctnnd2),ENSRNOG00000015734(Ube3a),ENSRNOG00000024450(Poc1b),ENSRNOG00000009571(Wipf3),ENSRNOG00000009783(Camk2g),ENSRNOG00000027434(Fitm2),ENSRNOG00…	1.07148	0.494682	1
GO:0005813	centrosome	cellular_component	7	301	429	19765	ENSRNOG00000053230(Fopnl),ENSRNOG00000043204(Harbi1),ENSRNOG00000014584(Odf2),ENSRNOG00000024450(Poc1b),ENSRNOG00000024266(Haus5),ENSRNOG00000038184(Camk2n2),ENSRNOG00000010999(Cep295),	1.07145	0.66967	1
GO:0045785	positive regulation of cell adhesion	biological_process	5	301	307	19765	ENSRNOG00000013166(Wnt4),ENSRNOG00000019220(Rhod),ENSRNOG00000017181(Malt1),ENSRNOG00000049115(Ccr5),ENSRNOG00000004276(Itga3),	1.06945	0.660628	1
GO:0005829	cytosol	cellular_component	24	301	1478	19765	ENSRNOG00000049115(Ccr5),ENSRNOG00000015734(Ube3a),ENSRNOG00000007203(Psmc6),ENSRNOG00000017181(Malt1),ENSRNOG00000016655(Pex6),ENSRNOG00000012436(Adh6),ENSRNOG00000020377(Cideb),ENSRNOG00000001719(Psmd2),ENSRNOG00000029115(RGD1564883),ENSRNOG00000018144(Depdc5),ENSRNOG00000019830(Hsd17b1),ENSRNOG00000038184(Camk2n2),ENSRNOG00000051711(Kpna1),ENSRNOG00000011573(Csad),ENSRNOG00000025895(Sdpr),ENSR…	1.06627	0.657782	1
GO:0051247	positive regulation of protein metabolic process	biological_process	20	301	1233	19765	ENSRNOG00000027787(Cdc6),ENSRNOG00000011859(Eif5a2),ENSRNOG00000060320(Lin28a),ENSRNOG00000039859(Dnmt1),ENSRNOG00000008065(Wwc1),ENSRNOG00000015734(Ube3a),ENSRNOG00000007203(Psmc6),ENSRNOG00000020377(Cideb),ENSRNOG00000002255(Fam162a),ENSRNOG00000017181(Malt1),ENSRNOG00000016133(Sumo1),ENSRNOG00000031544(Larp1),ENSRNOG00000031162(Ccl24),ENSRNOG00000015602(Cdh2),ENSRNOG00000000841(Ddx39b),ENSRNOG…	1.06512	0.67149	1
GO:0032870	cellular response to hormone stimulus	biological_process	9	301	555	19765	ENSRNOG00000002011(Gnrhr),ENSRNOG00000002593(Esrrg),ENSRNOG00000015734(Ube3a),ENSRNOG00000005616(Ncoa3),ENSRNOG00000016448(Eef2k),ENSRNOG00000018009(Rab8b),ENSRNOG00000030118(Msn),ENSRNOG00000004158(Hdac9),ENSRNOG00000027787(Cdc6),	1.06483	0.6866	1
GO:0016023	cytoplasmic, membrane-bounded vesicle	cellular_component	12	301	741	19765	ENSRNOG00000019629(Lamp1),ENSRNOG00000011820(Acpp),ENSRNOG00000000394(Srgn),ENSRNOG00000048606(Vma21),ENSRNOG00000007744(Ehd3),ENSRNOG00000008619(Agtrap),ENSRNOG00000058940(Rab11fip1),ENSRNOG00000036745(Gna13),ENSRNOG00000002254(Tmem33),ENSRNOG00000018009(Rab8b),ENSRNOG00000018901(Rab14),ENSRNOG00000048932(Smagp),	1.06339	0.690217	1
GO:0051098	regulation of binding	biological_process	4	301	247	19765	ENSRNOG00000016133(Sumo1),ENSRNOG00000024194(Rsf1),ENSRNOG00000020482(Nfatc4),ENSRNOG00000019727(Dph3),	1.06339	0.655936	1
GO:0006974	cellular response to DNA damage stimulus	biological_process	9	301	556	19765	ENSRNOG00000012264(Alkbh1),ENSRNOG00000001134(Rfc5),ENSRNOG00000020751(Rdm1),ENSRNOG00000019978(Parg),ENSRNOG00000031916(Timeless),ENSRNOG00000001453(Baz1b),ENSRNOG00000036699(RGD1306926),ENSRNOG00000000841(Ddx39b),ENSRNOG00000020482(Nfatc4),	1.06291	0.69052	1
GO:0005783	endoplasmic reticulum	cellular_component	18	301	1112	19765	ENSRNOG00000053269(Tmem106c),ENSRNOG00000006462(Ero1l),ENSRNOG00000000457(Tap1),ENSRNOG00000009783(Camk2g),ENSRNOG00000004585(Tmtc2),ENSRNOG00000008619(Agtrap),ENSRNOG00000014628(Pomk),ENSRNOG00000057934(Tmx1),ENSRNOG00000027434(Fitm2),ENSRNOG00000001285(Atp2a2),ENSRNOG00000036866(Acer3),ENSRNOG00000000230(Lmf1),ENSRNOG00000050828(Vkorc1),ENSRNOG00000048606(Vma21),ENSRNOG00000012818(Ksr1),ENSRNOG…	1.06291	0.682399	1
GO:0030900	forebrain development	biological_process	6	301	372	19765	ENSRNOG00000008022(Apaf1),ENSRNOG00000004019(Phlda1),ENSRNOG00000015602(Cdh2),ENSRNOG00000049115(Ccr5),ENSRNOG00000013166(Wnt4),ENSRNOG00000003261(Usp9x),	1.0591	0.685781	1
GO:0048511	rhythmic process	biological_process	5	301	311	19765	ENSRNOG00000012358(Pcyt1b),ENSRNOG00000009348(Nos3),ENSRNOG00000015734(Ube3a),ENSRNOG00000031916(Timeless),ENSRNOG00000001189(Sik1),	1.0557	0.681676	1
GO:0008380	RNA splicing	biological_process	4	301	249	19765	ENSRNOG00000002827(Rbfox1),ENSRNOG00000000841(Ddx39b),ENSRNOG00000052968(Hnrnpa3),ENSRNOG00000007629(Sf3a3),	1.05485	0.667682	1
GO:0045121	membrane raft	cellular_component	4	301	249	19765	ENSRNOG00000009348(Nos3),ENSRNOG00000025895(Sdpr),ENSRNOG00000015602(Cdh2),ENSRNOG00000011321(Rftn1),	1.05485	0.667682	1
GO:0043234	protein complex	cellular_component	56	301	3488	19765	ENSRNOG00000048606(Vma21),ENSRNOG00000025757(Myh6),ENSRNOG00000025423(Map3k13),ENSRNOG00000024194(Rsf1),ENSRNOG00000001134(Rfc5),ENSRNOG00000001285(Atp2a2),ENSRNOG00000006639(Scn9a),ENSRNOG00000031544(Larp1),ENSRNOG00000011321(Rftn1),ENSRNOG00000060693(AC118147.2),ENSRNOG00000032034(Supt5h),ENSRNOG00000000934(Piwil1),ENSRNOG00000003063(Phka1),ENSRNOG00000021200(Hfe2),ENSRNOG00000015602(Cdh2),ENSR…	1.05425	0.633548	1
GO:0051272	positive regulation of cellular component movement	biological_process	6	301	374	19765	ENSRNOG00000002215(Mylk),ENSRNOG00000049115(Ccr5),ENSRNOG00000031162(Ccl24),ENSRNOG00000004276(Itga3),ENSRNOG00000004158(Hdac9),ENSRNOG00000019220(Rhod),	1.05344	0.695415	1
GO:0033218	amide binding	molecular_function	4	301	250	19765	ENSRNOG00000000457(Tap1),ENSRNOG00000038999(RT1-A1),ENSRNOG00000013557(Lancl1),ENSRNOG00000051711(Kpna1),	1.05063	0.673562	1
GO:0019752	carboxylic acid metabolic process	biological_process	12	301	750	19765	ENSRNOG00000024128(Aco2),ENSRNOG00000011573(Csad),ENSRNOG00000054724(Pycrl),ENSRNOG00000007102(Acss1),ENSRNOG00000055408(Gcat),ENSRNOG00000039859(Dnmt1),ENSRNOG00000012436(Adh6),ENSRNOG00000009348(Nos3),ENSRNOG00000020658(Aarsd1),ENSRNOG00000006462(Ero1l),ENSRNOG00000019630(Hacl1),ENSRNOG00000005193(Pfas),	1.05063	0.720807	1
GO:0006163	purine nucleotide metabolic process	biological_process	7	301	438	19765	ENSRNOG00000046276(Myh3),ENSRNOG00000011071(Nt5e),ENSRNOG00000052506(Ak3),ENSRNOG00000025757(Myh6),ENSRNOG00000005193(Pfas),ENSRNOG00000016983(Myh7),ENSRNOG00000028814(Oasl2),	1.04943	0.709771	1
GO:0006874	cellular calcium ion homeostasis	biological_process	5	301	313	19765	ENSRNOG00000049115(Ccr5),ENSRNOG00000036745(Gna13),ENSRNOG00000001285(Atp2a2),ENSRNOG00000006462(Ero1l),ENSRNOG00000002265(Casr),	1.04895	0.692226	1
GO:0009725	response to hormone	biological_process	15	301	940	19765	ENSRNOG00000027787(Cdc6),ENSRNOG00000016448(Eef2k),ENSRNOG00000009826(Bche),ENSRNOG00000004158(Hdac9),ENSRNOG00000018009(Rab8b),ENSRNOG00000030118(Msn),ENSRNOG00000005616(Ncoa3),ENSRNOG00000027592(Rerg),ENSRNOG00000002593(Esrrg),ENSRNOG00000015734(Ube3a),ENSRNOG00000004276(Itga3),ENSRNOG00000039859(Dnmt1),ENSRNOG00000002011(Gnrhr),ENSRNOG00000012436(Adh6),ENSRNOG00000001285(Atp2a2),	1.04784	0.728354	1
GO:0071383	cellular response to steroid hormone stimulus	biological_process	4	301	251	19765	ENSRNOG00000030118(Msn),ENSRNOG00000005616(Ncoa3),ENSRNOG00000002593(Esrrg),ENSRNOG00000015734(Ube3a),	1.04645	0.679446	1
GO:0005794	Golgi apparatus	cellular_component	16	301	1006	19765	ENSRNOG00000000417(Numa1),ENSRNOG00000027787(Cdc6),ENSRNOG00000016953(Chst4),ENSRNOG00000012037(Galnt7),ENSRNOG00000033101(Myo18a),ENSRNOG00000008619(Agtrap),ENSRNOG00000054989(Grhl1),ENSRNOG00000003971(Gosr1),ENSRNOG00000018901(Rab14),ENSRNOG00000018009(Rab8b),ENSRNOG00000018574(Qsox2),ENSRNOG00000047620(Golph3l),ENSRNOG00000000230(Lmf1),ENSRNOG00000011820(Acpp),ENSRNOG00000000394(Srgn),ENSRNOG0…	1.04437	0.737815	1
GO:0048863	stem cell differentiation	biological_process	4	301	252	19765	ENSRNOG00000060320(Lin28a),ENSRNOG00000005616(Ncoa3),ENSRNOG00000009826(Bche),ENSRNOG00000013166(Wnt4),	1.04229	0.685334	1
GO:0005773	vacuole	cellular_component	7	301	442	19765	ENSRNOG00000018144(Depdc5),ENSRNOG00000008064(Naga),ENSRNOG00000019212(Tpp1),ENSRNOG00000019629(Lamp1),ENSRNOG00000011820(Acpp),ENSRNOG00000000394(Srgn),ENSRNOG00000018901(Rab14),	1.03993	0.727682	1
GO:0005929	cilium	cellular_component	6	301	379	19765	ENSRNOG00000060693(AC118147.2),ENSRNOG00000053230(Fopnl),ENSRNOG00000014584(Odf2),ENSRNOG00000024450(Poc1b),ENSRNOG00000017975(Dnajb13),ENSRNOG00000007744(Ehd3),	1.03954	0.719563	1
GO:0031982	vesicle	cellular_component	45	301	2843	19765	ENSRNOG00000030118(Msn),ENSRNOG00000018009(Rab8b),ENSRNOG00000018901(Rab14),ENSRNOG00000015602(Cdh2),ENSRNOG00000048932(Smagp),ENSRNOG00000011321(Rftn1),ENSRNOG00000001285(Atp2a2),ENSRNOG00000017383(l7Rn6),ENSRNOG00000005193(Pfas),ENSRNOG00000048606(Vma21),ENSRNOG00000007023(Galm),ENSRNOG00000002215(Mylk),ENSRNOG00000002254(Tmem33),ENSRNOG00000005711(Ptprd),ENSRNOG00000036745(Gna13),ENSRNOG000000…	1.03936	0.724019	1
GO:0016477	cell migration	biological_process	16	301	1011	19765	ENSRNOG00000033101(Myo18a),ENSRNOG00000014628(Pomk),ENSRNOG00000015602(Cdh2),ENSRNOG00000031162(Ccl24),ENSRNOG00000003261(Usp9x),ENSRNOG00000036745(Gna13),ENSRNOG00000030118(Msn),ENSRNOG00000004158(Hdac9),ENSRNOG00000004276(Itga3),ENSRNOG00000049115(Ccr5),ENSRNOG00000008065(Wwc1),ENSRNOG00000009348(Nos3),ENSRNOG00000019220(Rhod),ENSRNOG00000013166(Wnt4),ENSRNOG00000026702(Amica1),ENSRNOG000000022…	1.0392	0.752626	1
GO:0007155	cell adhesion	biological_process	17	301	1075	19765	ENSRNOG00000017181(Malt1),ENSRNOG00000016632(Dsg3),ENSRNOG00000049115(Ccr5),ENSRNOG00000026702(Amica1),ENSRNOG00000011071(Nt5e),ENSRNOG00000025111(Nfkbid),ENSRNOG00000049137(Zfp35),ENSRNOG00000026762(RT1-DOa),ENSRNOG00000019220(Rhod),ENSRNOG00000013166(Wnt4),ENSRNOG00000004276(Itga3),ENSRNOG00000009184(Foxp1),ENSRNOG00000030118(Msn),ENSRNOG00000015602(Cdh2),ENSRNOG00000048932(Smagp),ENSRNOG000000…	1.03841	0.755101	1
GO:0009056	catabolic process	biological_process	26	301	1645	19765	ENSRNOG00000055408(Gcat),ENSRNOG00000001719(Psmd2),ENSRNOG00000011663(Rnf7),ENSRNOG00000011975(Crtc3),ENSRNOG00000025222(Pcid2),ENSRNOG00000060320(Lin28a),ENSRNOG00000011071(Nt5e),ENSRNOG00000008064(Naga),ENSRNOG00000019630(Hacl1),ENSRNOG00000012324(Soga3),ENSRNOG00000015734(Ube3a),ENSRNOG00000009348(Nos3),ENSRNOG00000012436(Adh6),ENSRNOG00000007203(Psmc6),ENSRNOG00000016133(Sumo1),ENSRNOG0000003…	1.03786	0.752537	1
GO:0031988	membrane-bounded vesicle	cellular_component	12	301	760	19765	ENSRNOG00000048606(Vma21),ENSRNOG00000019629(Lamp1),ENSRNOG00000011820(Acpp),ENSRNOG00000000394(Srgn),ENSRNOG00000048932(Smagp),ENSRNOG00000007744(Ehd3),ENSRNOG00000008619(Agtrap),ENSRNOG00000036745(Gna13),ENSRNOG00000058940(Rab11fip1),ENSRNOG00000018901(Rab14),ENSRNOG00000002254(Tmem33),ENSRNOG00000018009(Rab8b),	1.03681	0.755032	1
GO:0031325	positive regulation of cellular metabolic process	biological_process	38	301	2411	19765	ENSRNOG00000001453(Baz1b),ENSRNOG00000000956(Rasl11a),ENSRNOG00000007408(Ebf4),ENSRNOG00000011859(Eif5a2),ENSRNOG00000025222(Pcid2),ENSRNOG00000039859(Dnmt1),ENSRNOG00000008065(Wwc1),ENSRNOG00000020377(Cideb),ENSRNOG00000017181(Malt1),ENSRNOG00000007203(Psmc6),ENSRNOG00000016133(Sumo1),ENSRNOG00000019653(Csrnp2),ENSRNOG00000000841(Ddx39b),ENSRNOG00000054989(Grhl1),ENSRNOG00000012818(Ksr1),ENSRNOG…	1.03494	0.752634	1
GO:0048589	developmental growth	biological_process	9	301	573	19765	ENSRNOG00000000841(Ddx39b),ENSRNOG00000003261(Usp9x),ENSRNOG00000005616(Ncoa3),ENSRNOG00000019318(Syt3),ENSRNOG00000009184(Foxp1),ENSRNOG00000025757(Myh6),ENSRNOG00000049115(Ccr5),ENSRNOG00000008065(Wwc1),ENSRNOG00000015734(Ube3a),	1.03138	0.757634	1
GO:0050769	positive regulation of neurogenesis	biological_process	6	301	382	19765	ENSRNOG00000016448(Eef2k),ENSRNOG00000019692(Metrn),ENSRNOG00000049115(Ccr5),ENSRNOG00000004276(Itga3),ENSRNOG00000019318(Syt3),ENSRNOG00000060320(Lin28a),	1.03138	0.734085	1
GO:0006281	DNA repair	biological_process	5	301	319	19765	ENSRNOG00000036699(RGD1306926),ENSRNOG00000012264(Alkbh1),ENSRNOG00000001134(Rfc5),ENSRNOG00000020751(Rdm1),ENSRNOG00000001453(Baz1b),	1.02922	0.723953	1
GO:0016740	transferase activity	molecular_function	33	301	2111	19765	ENSRNOG00000015734(Ube3a),ENSRNOG00000012358(Pcyt1b),ENSRNOG00000010124(Trim2),ENSRNOG00000014628(Pomk),ENSRNOG00000009783(Camk2g),ENSRNOG00000036918(Mettl20),ENSRNOG00000011663(Rnf7),ENSRNOG00000055408(Gcat),ENSRNOG00000029064(Zcchc4),ENSRNOG00000002215(Mylk),ENSRNOG00000017157(Trim69),ENSRNOG00000025423(Map3k13),ENSRNOG00000005234(Gxylt1),ENSRNOG00000021200(Hfe2),ENSRNOG00000003063(Phka1),ENSRN…	1.02649	0.793147	1
GO:0002376	immune system process	biological_process	28	301	1792	19765	ENSRNOG00000026762(RT1-DOa),ENSRNOG00000025111(Nfkbid),ENSRNOG00000011975(Crtc3),ENSRNOG00000001050(Eif2ak1),ENSRNOG00000049137(Zfp35),ENSRNOG00000000457(Tap1),ENSRNOG00000025222(Pcid2),ENSRNOG00000026702(Amica1),ENSRNOG00000049115(Ccr5),ENSRNOG00000019629(Lamp1),ENSRNOG00000000308(Zbtb24),ENSRNOG00000017181(Malt1),ENSRNOG00000003298(Cd247),ENSRNOG00000011321(Rftn1),ENSRNOG00000048932(Smagp),ENSR…	1.02601	0.796601	1
GO:0000977	RNA polymerase II regulatory region sequence-specific DNA binding	molecular_function	8	301	512	19765	ENSRNOG00000007408(Ebf4),ENSRNOG00000020482(Nfatc4),ENSRNOG00000004730(Meis2),ENSRNOG00000054989(Grhl1),ENSRNOG00000009139(Fubp3),ENSRNOG00000002593(Esrrg),ENSRNOG00000028856(Pknox2),ENSRNOG00000009184(Foxp1),	1.02601	0.762972	1
GO:0006325	chromatin organization	biological_process	9	301	577	19765	ENSRNOG00000001453(Baz1b),ENSRNOG00000032224(Hist1h4b),ENSRNOG00000021555(Mis18a),ENSRNOG00000004158(Hdac9),ENSRNOG00000007887(Elk4),ENSRNOG00000024194(Rsf1),ENSRNOG00000005616(Ncoa3),ENSRNOG00000021614(Kmt2e),ENSRNOG00000039859(Dnmt1),	1.02423	0.773519	1
GO:0010467	gene expression	biological_process	69	301	4424	19765	ENSRNOG00000011975(Crtc3),ENSRNOG00000026569(LOC102555377),ENSRNOG00000039829(Rpp14),ENSRNOG00000060320(Lin28a),ENSRNOG00000006462(Ero1l),ENSRNOG00000000308(Zbtb24),ENSRNOG00000014935(Peo1),ENSRNOG00000049115(Ccr5),ENSRNOG00000009139(Fubp3),ENSRNOG00000032034(Supt5h),ENSRNOG00000003261(Usp9x),ENSRNOG00000030118(Msn),ENSRNOG00000004730(Meis2),ENSRNOG00000002827(Rbfox1),ENSRNOG00000025757(Myh6),ENS…	1.02415	0.783553	1
GO:0005623	cell	cellular_component	231	301	14844	19765	ENSRNOG00000012037(Galnt7),ENSRNOG00000038999(RT1-A1),ENSRNOG00000000394(Srgn),ENSRNOG00000012965(Themis2),ENSRNOG00000019212(Tpp1),ENSRNOG00000015746(Kcng4),ENSRNOG00000047620(Golph3l),ENSRNOG00000005616(Ncoa3),ENSRNOG00000052968(Hnrnpa3),ENSRNOG00000058940(Rab11fip1),ENSRNOG00000047080(Gng4),ENSRNOG00000007887(Elk4),ENSRNOG00000027317(Ylpm1),ENSRNOG00000007408(Ebf4),ENSRNOG00000048138(Zfp566),E…	1.02186	0.712843	1
GO:0008152	metabolic process	biological_process	166	301	10679	19765	ENSRNOG00000001426(Prkrip1),ENSRNOG00000007203(Psmc6),ENSRNOG00000027921(Rlf),ENSRNOG00000008065(Wwc1),ENSRNOG00000039859(Dnmt1),ENSRNOG00000025406(Iqgap2),ENSRNOG00000007887(Elk4),ENSRNOG00000027317(Ylpm1),ENSRNOG00000007408(Ebf4),ENSRNOG00000048138(Zfp566),ENSRNOG00000000394(Srgn),ENSRNOG00000019212(Tpp1),ENSRNOG00000014049(Riok1),ENSRNOG00000042289(Plcxd2),ENSRNOG00000005616(Ncoa3),ENSRNOG0000…	1.02072	0.754944	1
GO:0045597	positive regulation of cell differentiation	biological_process	12	301	772	19765	ENSRNOG00000016448(Eef2k),ENSRNOG00000025222(Pcid2),ENSRNOG00000000841(Ddx39b),ENSRNOG00000013166(Wnt4),ENSRNOG00000004276(Itga3),ENSRNOG00000019692(Metrn),ENSRNOG00000049115(Ccr5),ENSRNOG00000021614(Kmt2e),ENSRNOG00000009184(Foxp1),ENSRNOG00000019318(Syt3),ENSRNOG00000060320(Lin28a),ENSRNOG00000005616(Ncoa3),	1.02069	0.796336	1
GO:0001558	regulation of cell growth	biological_process	5	301	322	19765	ENSRNOG00000027592(Rerg),ENSRNOG00000019318(Syt3),ENSRNOG00000047080(Gng4),ENSRNOG00000000841(Ddx39b),ENSRNOG00000049115(Ccr5),	1.01963	0.739848	1
GO:0010033	response to organic substance	biological_process	38	301	2448	19765	ENSRNOG00000060320(Lin28a),ENSRNOG00000006462(Ero1l),ENSRNOG00000015734(Ube3a),ENSRNOG00000049115(Ccr5),ENSRNOG00000014935(Peo1),ENSRNOG00000009348(Nos3),ENSRNOG00000012436(Adh6),ENSRNOG00000013610(Chrna5),ENSRNOG00000027787(Cdc6),ENSRNOG00000027592(Rerg),ENSRNOG00000025757(Myh6),ENSRNOG00000002593(Esrrg),ENSRNOG00000001285(Atp2a2),ENSRNOG00000011321(Rftn1),ENSRNOG00000031162(Ccl24),ENSRNOG000000…	1.0193	0.823913	1
GO:0019693	ribose phosphate metabolic process	biological_process	7	301	451	19765	ENSRNOG00000011071(Nt5e),ENSRNOG00000046276(Myh3),ENSRNOG00000018326(Pgls),ENSRNOG00000052506(Ak3),ENSRNOG00000005193(Pfas),ENSRNOG00000016983(Myh7),ENSRNOG00000025757(Myh6),	1.01918	0.768116	1
GO:0031410	cytoplasmic vesicle	cellular_component	13	301	838	19765	ENSRNOG00000036745(Gna13),ENSRNOG00000058940(Rab11fip1),ENSRNOG00000005957(Slc4a7),ENSRNOG00000018901(Rab14),ENSRNOG00000002254(Tmem33),ENSRNOG00000018009(Rab8b),ENSRNOG00000007744(Ehd3),ENSRNOG00000008619(Agtrap),ENSRNOG00000048932(Smagp),ENSRNOG00000000394(Srgn),ENSRNOG00000019629(Lamp1),ENSRNOG00000011820(Acpp),ENSRNOG00000048606(Vma21),	1.01866	0.805291	1
GO:0034645	cellular macromolecule biosynthetic process	biological_process	62	301	3998	19765	ENSRNOG00000003261(Usp9x),ENSRNOG00000005234(Gxylt1),ENSRNOG00000021200(Hfe2),ENSRNOG00000019165(Mrpl51),ENSRNOG00000020482(Nfatc4),ENSRNOG00000004730(Meis2),ENSRNOG00000031544(Larp1),ENSRNOG00000009139(Fubp3),ENSRNOG00000032034(Supt5h),ENSRNOG00000001189(Sik1),ENSRNOG00000016683(Zfp668),ENSRNOG00000020658(Aarsd1),ENSRNOG00000002593(Esrrg),ENSRNOG00000000230(Lmf1),ENSRNOG00000025423(Map3k13),ENSR…	1.01831	0.822515	1
GO:0044237	cellular metabolic process	biological_process	134	301	8643	19765	ENSRNOG00000009139(Fubp3),ENSRNOG00000021555(Mis18a),ENSRNOG00000032034(Supt5h),ENSRNOG00000030118(Msn),ENSRNOG00000009826(Bche),ENSRNOG00000004730(Meis2),ENSRNOG00000025757(Myh6),ENSRNOG00000019817(Ddx28),ENSRNOG00000001134(Rfc5),ENSRNOG00000011975(Crtc3),ENSRNOG00000001719(Psmd2),ENSRNOG00000014628(Pomk),ENSRNOG00000025360(Exd1),ENSRNOG00000012324(Soga3),ENSRNOG00000060320(Lin28a),ENSRNOG000000…	1.01805	0.793783	1
GO:0032880	regulation of protein localization	biological_process	12	301	775	19765	ENSRNOG00000000394(Srgn),ENSRNOG00000004276(Itga3),ENSRNOG00000049115(Ccr5),ENSRNOG00000002265(Casr),ENSRNOG00000047620(Golph3l),ENSRNOG00000058940(Rab11fip1),ENSRNOG00000018901(Rab14),ENSRNOG00000030118(Msn),ENSRNOG00000033101(Myo18a),ENSRNOG00000015602(Cdh2),ENSRNOG00000021555(Mis18a),ENSRNOG00000019727(Dph3),	1.01674	0.80669	1
GO:2001233	regulation of apoptotic signaling pathway	biological_process	5	301	323	19765	ENSRNOG00000020377(Cideb),ENSRNOG00000002255(Fam162a),ENSRNOG00000013166(Wnt4),ENSRNOG00000020482(Nfatc4),ENSRNOG00000008022(Apaf1),	1.01648	0.745149	1
GO:0031667	response to nutrient levels	biological_process	8	301	517	19765	ENSRNOG00000002265(Casr),ENSRNOG00000008022(Apaf1),ENSRNOG00000013166(Wnt4),ENSRNOG00000039859(Dnmt1),ENSRNOG00000031544(Larp1),ENSRNOG00000018144(Depdc5),ENSRNOG00000032034(Supt5h),ENSRNOG00000009826(Bche),	1.01608	0.78404	1
GO:0001012	RNA polymerase II regulatory region DNA binding	molecular_function	8	301	517	19765	ENSRNOG00000002593(Esrrg),ENSRNOG00000028856(Pknox2),ENSRNOG00000009184(Foxp1),ENSRNOG00000004730(Meis2),ENSRNOG00000020482(Nfatc4),ENSRNOG00000007408(Ebf4),ENSRNOG00000054989(Grhl1),ENSRNOG00000009139(Fubp3),	1.01608	0.78404	1
GO:0030003	cellular cation homeostasis	biological_process	7	301	454	19765	ENSRNOG00000006462(Ero1l),ENSRNOG00000002265(Casr),ENSRNOG00000049115(Ccr5),ENSRNOG00000005957(Slc4a7),ENSRNOG00000001285(Atp2a2),ENSRNOG00000021200(Hfe2),ENSRNOG00000036745(Gna13),	1.01245	0.78162	1
GO:0043085	positive regulation of catalytic activity	biological_process	16	301	1039	19765	ENSRNOG00000016133(Sumo1),ENSRNOG00000031162(Ccl24),ENSRNOG00000002265(Casr),ENSRNOG00000025423(Map3k13),ENSRNOG00000008022(Apaf1),ENSRNOG00000013166(Wnt4),ENSRNOG00000000230(Lmf1),ENSRNOG00000028946(Cdc42ep4),ENSRNOG00000027787(Cdc6),ENSRNOG00000036745(Gna13),ENSRNOG00000032703(Rasgrp3),ENSRNOG00000025406(Iqgap2),ENSRNOG00000002255(Fam162a),ENSRNOG00000020377(Cideb),ENSRNOG00000017181(Malt1),ENS…	1.01119	0.836195	1
GO:0003682	chromatin binding	molecular_function	7	301	455	19765	ENSRNOG00000039859(Dnmt1),ENSRNOG00000054989(Grhl1),ENSRNOG00000007887(Elk4),ENSRNOG00000032034(Supt5h),ENSRNOG00000001453(Baz1b),ENSRNOG00000005616(Ncoa3),ENSRNOG00000009184(Foxp1),	1.01022	0.786122	1
GO:0055114	oxidation-reduction process	biological_process	14	301	911	19765	ENSRNOG00000024128(Aco2),ENSRNOG00000020482(Nfatc4),ENSRNOG00000005749(Foxred2),ENSRNOG00000003063(Phka1),ENSRNOG00000009620(Cybrd1),ENSRNOG00000054724(Pycrl),ENSRNOG00000019830(Hsd17b1),ENSRNOG00000012436(Adh6),ENSRNOG00000009348(Nos3),ENSRNOG00000003622(Cybb),ENSRNOG00000019630(Hacl1),ENSRNOG00000012264(Alkbh1),ENSRNOG00000018574(Qsox2),ENSRNOG00000050828(Vkorc1),	1.00911	0.83573	1
GO:0010942	positive regulation of cell death	biological_process	8	301	521	19765	ENSRNOG00000002866(Rassf6),ENSRNOG00000008022(Apaf1),ENSRNOG00000002255(Fam162a),ENSRNOG00000020377(Cideb),ENSRNOG00000049115(Ccr5),ENSRNOG00000025111(Nfkbid),ENSRNOG00000004019(Phlda1),ENSRNOG00000020482(Nfatc4),	1.00828	0.80091	1
GO:0050865	regulation of cell activation	biological_process	6	301	391	19765	ENSRNOG00000049137(Zfp35),ENSRNOG00000025111(Nfkbid),ENSRNOG00000026762(RT1-DOa),ENSRNOG00000017181(Malt1),ENSRNOG00000025222(Pcid2),ENSRNOG00000019629(Lamp1),	1.00764	0.777742	1
GO:0043005	neuron projection	cellular_component	14	301	915	19765	ENSRNOG00000013610(Chrna5),ENSRNOG00000014409(Myl7),ENSRNOG00000013171(Grm2),ENSRNOG00000004276(Itga3),ENSRNOG00000019629(Lamp1),ENSRNOG00000001427(Orai2),ENSRNOG00000002265(Casr),ENSRNOG00000006462(Ero1l),ENSRNOG00000052968(Hnrnpa3),ENSRNOG00000020444(Hcn3),ENSRNOG00000003261(Usp9x),ENSRNOG00000016133(Sumo1),ENSRNOG00000010649(Ctnnd2),ENSRNOG00000000417(Numa1),	1.0047	0.848543	1
GO:0043025	neuronal cell body	cellular_component	7	301	458	19765	ENSRNOG00000019629(Lamp1),ENSRNOG00000039859(Dnmt1),ENSRNOG00000013610(Chrna5),ENSRNOG00000020444(Hcn3),ENSRNOG00000010649(Ctnnd2),ENSRNOG00000000417(Numa1),ENSRNOG00000002265(Casr),	1.00361	0.799634	1
GO:0019222	regulation of metabolic process	biological_process	82	301	5370	19765	ENSRNOG00000005616(Ncoa3),ENSRNOG00000004276(Itga3),ENSRNOG00000006925(Zfp786),ENSRNOG00000052061(Ppef2),ENSRNOG00000025406(Iqgap2),ENSRNOG00000020377(Cideb),ENSRNOG00000001426(Prkrip1),ENSRNOG00000007203(Psmc6),ENSRNOG00000039859(Dnmt1),ENSRNOG00000008065(Wwc1),ENSRNOG00000048138(Zfp566),ENSRNOG00000001453(Baz1b),ENSRNOG00000007887(Elk4),ENSRNOG00000027317(Ylpm1),ENSRNOG00000007408(Ebf4),ENSRNOG…	1.0027	0.92341	1
GO:0048869	cellular developmental process	biological_process	52	301	3407	19765	ENSRNOG00000019318(Syt3),ENSRNOG00000039859(Dnmt1),ENSRNOG00000019692(Metrn),ENSRNOG00000017181(Malt1),ENSRNOG00000026762(RT1-DOa),ENSRNOG00000001050(Eif2ak1),ENSRNOG00000007744(Ehd3),ENSRNOG00000016448(Eef2k),ENSRNOG00000004158(Hdac9),ENSRNOG00000007887(Elk4),ENSRNOG00000005957(Slc4a7),ENSRNOG00000025222(Pcid2),ENSRNOG00000008022(Apaf1),ENSRNOG00000005616(Ncoa3),ENSRNOG00000021614(Kmt2e),ENSRNOG…	1.00222	0.915476	1
GO:0071310	cellular response to organic substance	biological_process	26	301	1705	19765	ENSRNOG00000008022(Apaf1),ENSRNOG00000005616(Ncoa3),ENSRNOG00000021614(Kmt2e),ENSRNOG00000025757(Myh6),ENSRNOG00000002265(Casr),ENSRNOG00000002593(Esrrg),ENSRNOG00000004276(Itga3),ENSRNOG00000013166(Wnt4),ENSRNOG00000002011(Gnrhr),ENSRNOG00000031162(Ccl24),ENSRNOG00000030118(Msn),ENSRNOG00000018009(Rab8b),ENSRNOG00000018901(Rab14),ENSRNOG00000020444(Hcn3),ENSRNOG00000003261(Usp9x),ENSRNOG00000021…	1.00133	0.893182	1
GO:0045595	regulation of cell differentiation	biological_process	21	301	1379	19765	ENSRNOG00000032224(Hist1h4b),ENSRNOG00000013674(Megf10),ENSRNOG00000001189(Sik1),ENSRNOG00000004730(Meis2),ENSRNOG00000020482(Nfatc4),ENSRNOG00000015602(Cdh2),ENSRNOG00000000841(Ddx39b),ENSRNOG00000009184(Foxp1),ENSRNOG00000021614(Kmt2e),ENSRNOG00000005616(Ncoa3),ENSRNOG00000013166(Wnt4),ENSRNOG00000004276(Itga3),ENSRNOG00000049137(Zfp35),ENSRNOG00000025111(Nfkbid),ENSRNOG00000026762(RT1-DOa),ENS…	0.999966	1	1
GO:0030334	regulation of cell migration	biological_process	9	301	591	19765	ENSRNOG00000002215(Mylk),ENSRNOG00000004276(Itga3),ENSRNOG00000049115(Ccr5),ENSRNOG00000019220(Rhod),ENSRNOG00000013166(Wnt4),ENSRNOG00000031162(Ccl24),ENSRNOG00000036745(Gna13),ENSRNOG00000030118(Msn),ENSRNOG00000004158(Hdac9),	0.999966	1	1
GO:0030155	regulation of cell adhesion	biological_process	8	301	526	19765	ENSRNOG00000013166(Wnt4),ENSRNOG00000019220(Rhod),ENSRNOG00000017181(Malt1),ENSRNOG00000049115(Ccr5),ENSRNOG00000004276(Itga3),ENSRNOG00000025111(Nfkbid),ENSRNOG00000049137(Zfp35),ENSRNOG00000026762(RT1-DOa),	0.998699	1	1
GO:0051603	proteolysis involved in cellular protein catabolic process	biological_process	8	301	527	19765	ENSRNOG00000005749(Foxred2),ENSRNOG00000003261(Usp9x),ENSRNOG00000025222(Pcid2),ENSRNOG00000016133(Sumo1),ENSRNOG00000001719(Psmd2),ENSRNOG00000011663(Rnf7),ENSRNOG00000015734(Ube3a),ENSRNOG00000007203(Psmc6),	0.996804	1	1
GO:0007276	gamete generation	biological_process	8	301	527	19765	ENSRNOG00000060320(Lin28a),ENSRNOG00000014584(Odf2),ENSRNOG00000013166(Wnt4),ENSRNOG00000012358(Pcyt1b),ENSRNOG00000009348(Nos3),ENSRNOG00000000934(Piwil1),ENSRNOG00000006965(Aff4),ENSRNOG00000009571(Wipf3),	0.996804	1	1
GO:0040008	regulation of growth	biological_process	8	301	528	19765	ENSRNOG00000027592(Rerg),ENSRNOG00000025757(Myh6),ENSRNOG00000009184(Foxp1),ENSRNOG00000019318(Syt3),ENSRNOG00000008065(Wwc1),ENSRNOG00000049115(Ccr5),ENSRNOG00000047080(Gng4),ENSRNOG00000000841(Ddx39b),	0.994916	1	1
GO:0007178	transmembrane receptor protein serine/threonine kinase signaling pathway	biological_process	4	301	264	19765	ENSRNOG00000003261(Usp9x),ENSRNOG00000021200(Hfe2),ENSRNOG00000004276(Itga3),ENSRNOG00000025757(Myh6),	0.994916	1	1
GO:0032268	regulation of cellular protein metabolic process	biological_process	31	301	2050	19765	ENSRNOG00000038184(Camk2n2),ENSRNOG00000016448(Eef2k),ENSRNOG00000011859(Eif5a2),ENSRNOG00000025222(Pcid2),ENSRNOG00000001050(Eif2ak1),ENSRNOG00000008065(Wwc1),ENSRNOG00000039859(Dnmt1),ENSRNOG00000001426(Prkrip1),ENSRNOG00000020377(Cideb),ENSRNOG00000017181(Malt1),ENSRNOG00000007203(Psmc6),ENSRNOG00000019653(Csrnp2),ENSRNOG00000000841(Ddx39b),ENSRNOG00000052061(Ppef2),ENSRNOG00000016133(Sumo1),E…	0.992975	1	1
GO:0060429	epithelium development	biological_process	15	301	993	19765	ENSRNOG00000054989(Grhl1),ENSRNOG00000036745(Gna13),ENSRNOG00000005957(Slc4a7),ENSRNOG00000030118(Msn),ENSRNOG00000015602(Cdh2),ENSRNOG00000020482(Nfatc4),ENSRNOG00000031916(Timeless),ENSRNOG00000000417(Numa1),ENSRNOG00000013166(Wnt4),ENSRNOG00000019212(Tpp1),ENSRNOG00000002265(Casr),ENSRNOG00000009184(Foxp1),ENSRNOG00000014265(Tnfrsf19),ENSRNOG00000005616(Ncoa3),ENSRNOG00000008022(Apaf1),	0.99191	1	1
GO:0008289	lipid binding	molecular_function	8	301	531	19765	ENSRNOG00000025895(Sdpr),ENSRNOG00000038365(Plekha2),ENSRNOG00000002593(Esrrg),ENSRNOG00000019318(Syt3),ENSRNOG00000026488(Gltpd2),ENSRNOG00000025406(Iqgap2),ENSRNOG00000047620(Golph3l),ENSRNOG00000004555(Sec14l4),	0.989295	1	1
GO:0007610	behavior	biological_process	11	301	731	19765	ENSRNOG00000010649(Ctnnd2),ENSRNOG00000006639(Scn9a),ENSRNOG00000004730(Meis2),ENSRNOG00000014628(Pomk),ENSRNOG00000009826(Bche),ENSRNOG00000059765(Asic1),ENSRNOG00000002265(Casr),ENSRNOG00000049115(Ccr5),ENSRNOG00000004276(Itga3),ENSRNOG00000013610(Chrna5),ENSRNOG00000012436(Adh6),	0.988111	1	1
GO:0006629	lipid metabolic process	biological_process	15	301	997	19765	ENSRNOG00000007102(Acss1),ENSRNOG00000001189(Sik1),ENSRNOG00000019830(Hsd17b1),ENSRNOG00000027434(Fitm2),ENSRNOG00000011975(Crtc3),ENSRNOG00000022268(Pnpla3),ENSRNOG00000003063(Phka1),ENSRNOG00000011071(Nt5e),ENSRNOG00000008064(Naga),ENSRNOG00000019630(Hacl1),ENSRNOG00000042289(Plcxd2),ENSRNOG00000000230(Lmf1),ENSRNOG00000012436(Adh6),ENSRNOG00000036866(Acer3),ENSRNOG00000013166(Wnt4),	0.987931	1	1
GO:0006952	defense response	biological_process	16	301	1064	19765	ENSRNOG00000002215(Mylk),ENSRNOG00000006639(Scn9a),ENSRNOG00000048932(Smagp),ENSRNOG00000011321(Rftn1),ENSRNOG00000001187(Oasl),ENSRNOG00000018901(Rab14),ENSRNOG00000038999(RT1-A1),ENSRNOG00000031162(Ccl24),ENSRNOG00000011071(Nt5e),ENSRNOG00000003622(Cybb),ENSRNOG00000017181(Malt1),ENSRNOG00000019629(Lamp1),ENSRNOG00000049115(Ccr5),ENSRNOG00000049137(Zfp35),ENSRNOG00000001050(Eif2ak1),ENSRNOG0000…	0.987435	1	1
GO:0012505	endomembrane system	cellular_component	41	301	2727	19765	ENSRNOG00000006462(Ero1l),ENSRNOG00000053269(Tmem106c),ENSRNOG00000019629(Lamp1),ENSRNOG00000049115(Ccr5),ENSRNOG00000011820(Acpp),ENSRNOG00000019830(Hsd17b1),ENSRNOG00000027434(Fitm2),ENSRNOG00000000417(Numa1),ENSRNOG00000027787(Cdc6),ENSRNOG00000009783(Camk2g),ENSRNOG00000003971(Gosr1),ENSRNOG00000051711(Kpna1),ENSRNOG00000014628(Pomk),ENSRNOG00000008619(Agtrap),ENSRNOG00000054385(Rhebl1),ENSRN…	0.987254	1	1
GO:0055082	cellular chemical homeostasis	biological_process	9	301	599	19765	ENSRNOG00000027434(Fitm2),ENSRNOG00000005957(Slc4a7),ENSRNOG00000021200(Hfe2),ENSRNOG00000036745(Gna13),ENSRNOG00000002265(Casr),ENSRNOG00000006462(Ero1l),ENSRNOG00000001285(Atp2a2),ENSRNOG00000049115(Ccr5),ENSRNOG00000014935(Peo1),	0.986611	1	1
GO:0009987	cellular process	biological_process	222	301	14786	19765	ENSRNOG00000022268(Pnpla3),ENSRNOG00000012037(Galnt7),ENSRNOG00000000394(Srgn),ENSRNOG00000014049(Riok1),ENSRNOG00000019212(Tpp1),ENSRNOG00000012965(Themis2),ENSRNOG00000015746(Kcng4),ENSRNOG00000047620(Golph3l),ENSRNOG00000052968(Hnrnpa3),ENSRNOG00000005616(Ncoa3),ENSRNOG00000058940(Rab11fip1),ENSRNOG00000007887(Elk4),ENSRNOG00000047080(Gng4),ENSRNOG00000027317(Ylpm1),ENSRNOG00000007408(Ebf4),EN…	0.985899	1	1
GO:0014070	response to organic cyclic compound	biological_process	15	301	1000	19765	ENSRNOG00000030118(Msn),ENSRNOG00000019208(P2rx5),ENSRNOG00000016448(Eef2k),ENSRNOG00000020444(Hcn3),ENSRNOG00000009826(Bche),ENSRNOG00000011321(Rftn1),ENSRNOG00000039859(Dnmt1),ENSRNOG00000002593(Esrrg),ENSRNOG00000015734(Ube3a),ENSRNOG00000013610(Chrna5),ENSRNOG00000012436(Adh6),ENSRNOG00000005616(Ncoa3),ENSRNOG00000060320(Lin28a),ENSRNOG00000050828(Vkorc1),ENSRNOG00000002265(Casr),	0.984967	1	1
GO:0016049	cell growth	biological_process	6	301	400	19765	ENSRNOG00000047080(Gng4),ENSRNOG00000003261(Usp9x),ENSRNOG00000000841(Ddx39b),ENSRNOG00000049115(Ccr5),ENSRNOG00000027592(Rerg),ENSRNOG00000019318(Syt3),	0.984967	1	1
GO:0043087	regulation of GTPase activity	biological_process	6	301	400	19765	ENSRNOG00000014083(Iqsec3),ENSRNOG00000013166(Wnt4),ENSRNOG00000031162(Ccl24),ENSRNOG00000025406(Iqgap2),ENSRNOG00000028946(Cdc42ep4),ENSRNOG00000032703(Rasgrp3),	0.984967	1	1
GO:0031323	regulation of cellular metabolic process	biological_process	71	301	4735	19765	ENSRNOG00000025111(Nfkbid),ENSRNOG00000027434(Fitm2),ENSRNOG00000027787(Cdc6),ENSRNOG00000001161(Gatc),ENSRNOG00000002255(Fam162a),ENSRNOG00000015734(Ube3a),ENSRNOG00000031544(Larp1),ENSRNOG00000001189(Sik1),ENSRNOG00000021200(Hfe2),ENSRNOG00000020482(Nfatc4),ENSRNOG00000015602(Cdh2),ENSRNOG00000031162(Ccl24),ENSRNOG00000054385(Rhebl1),ENSRNOG00000025423(Map3k13),ENSRNOG00000009184(Foxp1),ENSRNOG…	0.98462	1	1
GO:0051246	regulation of protein metabolic process	biological_process	33	301	2201	19765	ENSRNOG00000008065(Wwc1),ENSRNOG00000039859(Dnmt1),ENSRNOG00000007203(Psmc6),ENSRNOG00000001426(Prkrip1),ENSRNOG00000020377(Cideb),ENSRNOG00000017181(Malt1),ENSRNOG00000038184(Camk2n2),ENSRNOG00000011859(Eif5a2),ENSRNOG00000025222(Pcid2),ENSRNOG00000016448(Eef2k),ENSRNOG00000001050(Eif2ak1),ENSRNOG00000008022(Apaf1),ENSRNOG00000012818(Ksr1),ENSRNOG00000001073(RGD1563482),ENSRNOG00000026466(Lrrtm3…	0.984519	1	1
GO:0032991	macromolecular complex	cellular_component	67	301	4469	19765	ENSRNOG00000004276(Itga3),ENSRNOG00000015746(Kcng4),ENSRNOG00000005616(Ncoa3),ENSRNOG00000052968(Hnrnpa3),ENSRNOG00000036699(RGD1306926),ENSRNOG00000033101(Myo18a),ENSRNOG00000038999(RT1-A1),ENSRNOG00000007203(Psmc6),ENSRNOG00000008065(Wwc1),ENSRNOG00000039859(Dnmt1),ENSRNOG00000025406(Iqgap2),ENSRNOG00000047080(Gng4),ENSRNOG00000018144(Depdc5),ENSRNOG00000001453(Baz1b),ENSRNOG00000001285(Atp2a2)…	0.984453	1	1
GO:0006873	cellular ion homeostasis	biological_process	7	301	467	19765	ENSRNOG00000021200(Hfe2),ENSRNOG00000036745(Gna13),ENSRNOG00000005957(Slc4a7),ENSRNOG00000001285(Atp2a2),ENSRNOG00000049115(Ccr5),ENSRNOG00000002265(Casr),ENSRNOG00000006462(Ero1l),	0.984264	1	1
GO:0030855	epithelial cell differentiation	biological_process	8	301	534	19765	ENSRNOG00000005616(Ncoa3),ENSRNOG00000009184(Foxp1),ENSRNOG00000019212(Tpp1),ENSRNOG00000013166(Wnt4),ENSRNOG00000000417(Numa1),ENSRNOG00000015602(Cdh2),ENSRNOG00000005957(Slc4a7),ENSRNOG00000030118(Msn),	0.983737	1	1
GO:0010720	positive regulation of cell development	biological_process	7	301	468	19765	ENSRNOG00000016448(Eef2k),ENSRNOG00000004276(Itga3),ENSRNOG00000019692(Metrn),ENSRNOG00000000841(Ddx39b),ENSRNOG00000049115(Ccr5),ENSRNOG00000019318(Syt3),ENSRNOG00000060320(Lin28a),	0.982161	1	1
GO:0043009	chordate embryonic development	biological_process	9	301	602	19765	ENSRNOG00000003174(Tapt1),ENSRNOG00000036745(Gna13),ENSRNOG00000045524(Slc39a3),ENSRNOG00000003261(Usp9x),ENSRNOG00000008022(Apaf1),ENSRNOG00000005616(Ncoa3),ENSRNOG00000009184(Foxp1),ENSRNOG00000025757(Myh6),ENSRNOG00000009348(Nos3),	0.981694	1	1
GO:0034613	cellular protein localization	biological_process	19	301	1271	19765	ENSRNOG00000004276(Itga3),ENSRNOG00000057221(Scn3b),ENSRNOG00000000394(Srgn),ENSRNOG00000017383(l7Rn6),ENSRNOG00000013166(Wnt4),ENSRNOG00000019220(Rhod),ENSRNOG00000018714(Arl5b),ENSRNOG00000015602(Cdh2),ENSRNOG00000018901(Rab14),ENSRNOG00000018009(Rab8b),ENSRNOG00000030118(Msn),ENSRNOG00000016133(Sumo1),ENSRNOG00000011321(Rftn1),ENSRNOG00000021555(Mis18a),ENSRNOG00000019629(Lamp1),ENSRNOG0000001…	0.981609	1	1
GO:0006875	cellular metal ion homeostasis	biological_process	6	301	402	19765	ENSRNOG00000006462(Ero1l),ENSRNOG00000002265(Casr),ENSRNOG00000049115(Ccr5),ENSRNOG00000001285(Atp2a2),ENSRNOG00000036745(Gna13),ENSRNOG00000021200(Hfe2),	0.980066	1	1
GO:0040012	regulation of locomotion	biological_process	10	301	670	19765	ENSRNOG00000019220(Rhod),ENSRNOG00000013166(Wnt4),ENSRNOG00000004276(Itga3),ENSRNOG00000049115(Ccr5),ENSRNOG00000002265(Casr),ENSRNOG00000002215(Mylk),ENSRNOG00000036745(Gna13),ENSRNOG00000030118(Msn),ENSRNOG00000004158(Hdac9),ENSRNOG00000031162(Ccl24),	0.980066	1	1
GO:0010817	regulation of hormone levels	biological_process	6	301	403	19765	ENSRNOG00000002265(Casr),ENSRNOG00000019830(Hsd17b1),ENSRNOG00000012436(Adh6),ENSRNOG00000058940(Rab11fip1),ENSRNOG00000013166(Wnt4),ENSRNOG00000018009(Rab8b),	0.977635	1	1
GO:0045664	regulation of neuron differentiation	biological_process	8	301	538	19765	ENSRNOG00000004276(Itga3),ENSRNOG00000019692(Metrn),ENSRNOG00000049115(Ccr5),ENSRNOG00000019318(Syt3),ENSRNOG00000060320(Lin28a),ENSRNOG00000020482(Nfatc4),ENSRNOG00000015602(Cdh2),ENSRNOG00000016448(Eef2k),	0.976423	1	1
GO:0044770	cell cycle phase transition	biological_process	4	301	269	19765	ENSRNOG00000031916(Timeless),ENSRNOG00000027787(Cdc6),ENSRNOG00000009783(Camk2g),ENSRNOG00000025222(Pcid2),	0.976423	1	1
GO:0051301	cell division	biological_process	6	301	404	19765	ENSRNOG00000032929(Incenp),ENSRNOG00000024178(Cenpt),ENSRNOG00000027787(Cdc6),ENSRNOG00000005616(Ncoa3),ENSRNOG00000025222(Pcid2),ENSRNOG00000013166(Wnt4),	0.975215	1	1
GO:0043235	receptor complex	cellular_component	4	301	270	19765	ENSRNOG00000004276(Itga3),ENSRNOG00000021200(Hfe2),ENSRNOG00000013610(Chrna5),ENSRNOG00000003298(Cd247),	0.972807	1	1
GO:0005667	transcription factor complex	cellular_component	4	301	270	19765	ENSRNOG00000020482(Nfatc4),ENSRNOG00000004300(Gtf2a1),ENSRNOG00000004158(Hdac9),ENSRNOG00000005616(Ncoa3),	0.972807	1	1
GO:0030163	protein catabolic process	biological_process	10	301	676	19765	ENSRNOG00000007203(Psmc6),ENSRNOG00000015734(Ube3a),ENSRNOG00000016133(Sumo1),ENSRNOG00000011663(Rnf7),ENSRNOG00000001719(Psmd2),ENSRNOG00000003261(Usp9x),ENSRNOG00000010794(Dennd3),ENSRNOG00000025222(Pcid2),ENSRNOG00000030118(Msn),ENSRNOG00000005749(Foxred2),	0.971368	1	1
GO:0009792	embryo development ending in birth or egg hatching	biological_process	9	301	610	19765	ENSRNOG00000005616(Ncoa3),ENSRNOG00000008022(Apaf1),ENSRNOG00000009184(Foxp1),ENSRNOG00000025757(Myh6),ENSRNOG00000009348(Nos3),ENSRNOG00000003174(Tapt1),ENSRNOG00000036745(Gna13),ENSRNOG00000045524(Slc39a3),ENSRNOG00000003261(Usp9x),	0.96882	1	1
GO:0009991	response to extracellular stimulus	biological_process	8	301	543	19765	ENSRNOG00000032034(Supt5h),ENSRNOG00000018144(Depdc5),ENSRNOG00000031544(Larp1),ENSRNOG00000009826(Bche),ENSRNOG00000008022(Apaf1),ENSRNOG00000002265(Casr),ENSRNOG00000039859(Dnmt1),ENSRNOG00000013166(Wnt4),	0.967432	1	1
GO:0030154	cell differentiation	biological_process	46	301	3139	19765	ENSRNOG00000032224(Hist1h4b),ENSRNOG00000004019(Phlda1),ENSRNOG00000000841(Ddx39b),ENSRNOG00000021614(Kmt2e),ENSRNOG00000008022(Apaf1),ENSRNOG00000005616(Ncoa3),ENSRNOG00000013166(Wnt4),ENSRNOG00000004276(Itga3),ENSRNOG00000019212(Tpp1),ENSRNOG00000001050(Eif2ak1),ENSRNOG00000026762(RT1-DOa),ENSRNOG00000016448(Eef2k),ENSRNOG00000025222(Pcid2),ENSRNOG00000004158(Hdac9),ENSRNOG00000007887(Elk4),ENS…	0.96227	1	1
GO:0048871	multicellular organismal homeostasis	biological_process	4	301	273	19765	ENSRNOG00000011975(Crtc3),ENSRNOG00000024450(Poc1b),ENSRNOG00000049115(Ccr5),ENSRNOG00000019212(Tpp1),	0.962117	1	1
GO:0045944	positive regulation of transcription from RNA polymerase II promoter	biological_process	13	301	888	19765	ENSRNOG00000007203(Psmc6),ENSRNOG00000002593(Esrrg),ENSRNOG00000015734(Ube3a),ENSRNOG00000009184(Foxp1),ENSRNOG00000005616(Ncoa3),ENSRNOG00000054989(Grhl1),ENSRNOG00000019653(Csrnp2),ENSRNOG00000004730(Meis2),ENSRNOG00000020482(Nfatc4),ENSRNOG00000007408(Ebf4),ENSRNOG00000011975(Crtc3),ENSRNOG00000009139(Fubp3),ENSRNOG00000032034(Supt5h),	0.961304	1	1
GO:0006955	immune response	biological_process	14	301	957	19765	ENSRNOG00000026762(RT1-DOa),ENSRNOG00000003298(Cd247),ENSRNOG00000011321(Rftn1),ENSRNOG00000049137(Zfp35),ENSRNOG00000048932(Smagp),ENSRNOG00000038999(RT1-A1),ENSRNOG00000031162(Ccl24),ENSRNOG00000001187(Oasl),ENSRNOG00000000457(Tap1),ENSRNOG00000009184(Foxp1),ENSRNOG00000012965(Themis2),ENSRNOG00000019629(Lamp1),ENSRNOG00000049115(Ccr5),ENSRNOG00000017181(Malt1),	0.960608	1	1
GO:0007420	brain development	biological_process	10	301	685	19765	ENSRNOG00000003261(Usp9x),ENSRNOG00000005957(Slc4a7),ENSRNOG00000015602(Cdh2),ENSRNOG00000014628(Pomk),ENSRNOG00000004019(Phlda1),ENSRNOG00000013166(Wnt4),ENSRNOG00000049115(Ccr5),ENSRNOG00000039859(Dnmt1),ENSRNOG00000011071(Nt5e),ENSRNOG00000008022(Apaf1),	0.958605	1	1
GO:0009611	response to wounding	biological_process	9	301	617	19765	ENSRNOG00000050828(Vkorc1),ENSRNOG00000002215(Mylk),ENSRNOG00000026702(Amica1),ENSRNOG00000011071(Nt5e),ENSRNOG00000013166(Wnt4),ENSRNOG00000049115(Ccr5),ENSRNOG00000036745(Gna13),ENSRNOG00000001811(Fgfr1op2),ENSRNOG00000031162(Ccl24),	0.957828	1	1
GO:0004842	ubiquitin-protein transferase activity	molecular_function	5	301	343	19765	ENSRNOG00000015734(Ube3a),ENSRNOG00000017181(Malt1),ENSRNOG00000017157(Trim69),ENSRNOG00000011663(Rnf7),ENSRNOG00000010124(Trim2),	0.957208	1	1
GO:0048870	cell motility	biological_process	16	301	1098	19765	ENSRNOG00000015602(Cdh2),ENSRNOG00000031162(Ccl24),ENSRNOG00000033101(Myo18a),ENSRNOG00000030118(Msn),ENSRNOG00000003261(Usp9x),ENSRNOG00000002215(Mylk),ENSRNOG00000004276(Itga3),ENSRNOG00000019220(Rhod),ENSRNOG00000013166(Wnt4),ENSRNOG00000014628(Pomk),ENSRNOG00000004158(Hdac9),ENSRNOG00000036745(Gna13),ENSRNOG00000026702(Amica1),ENSRNOG00000008065(Wwc1),ENSRNOG00000049115(Ccr5),ENSRNOG000000093…	0.956859	1	1
GO:2000145	regulation of cell motility	biological_process	9	301	618	19765	ENSRNOG00000049115(Ccr5),ENSRNOG00000004276(Itga3),ENSRNOG00000013166(Wnt4),ENSRNOG00000019220(Rhod),ENSRNOG00000002215(Mylk),ENSRNOG00000031162(Ccl24),ENSRNOG00000004158(Hdac9),ENSRNOG00000030118(Msn),ENSRNOG00000036745(Gna13),	0.956278	1	1
GO:0006082	organic acid metabolic process	biological_process	12	301	825	19765	ENSRNOG00000024128(Aco2),ENSRNOG00000011573(Csad),ENSRNOG00000054724(Pycrl),ENSRNOG00000055408(Gcat),ENSRNOG00000007102(Acss1),ENSRNOG00000039859(Dnmt1),ENSRNOG00000020658(Aarsd1),ENSRNOG00000009348(Nos3),ENSRNOG00000012436(Adh6),ENSRNOG00000019630(Hacl1),ENSRNOG00000006462(Ero1l),ENSRNOG00000005193(Pfas),	0.955119	1	1
GO:0005102	receptor binding	molecular_function	19	301	1309	19765	ENSRNOG00000005616(Ncoa3),ENSRNOG00000002265(Casr),ENSRNOG00000004276(Itga3),ENSRNOG00000013166(Wnt4),ENSRNOG00000001285(Atp2a2),ENSRNOG00000048932(Smagp),ENSRNOG00000038999(RT1-A1),ENSRNOG00000020482(Nfatc4),ENSRNOG00000031162(Ccl24),ENSRNOG00000021200(Hfe2),ENSRNOG00000030118(Msn),ENSRNOG00000018009(Rab8b),ENSRNOG00000026702(Amica1),ENSRNOG00000019630(Hacl1),ENSRNOG00000049115(Ccr5),ENSRNOG0000…	0.953113	1	1
GO:0010646	regulation of cell communication	biological_process	35	301	2414	19765	ENSRNOG00000010649(Ctnnd2),ENSRNOG00000032034(Supt5h),ENSRNOG00000031544(Larp1),ENSRNOG00000006639(Scn9a),ENSRNOG00000020482(Nfatc4),ENSRNOG00000031162(Ccl24),ENSRNOG00000015602(Cdh2),ENSRNOG00000018009(Rab8b),ENSRNOG00000009826(Bche),ENSRNOG00000021200(Hfe2),ENSRNOG00000025423(Map3k13),ENSRNOG00000001285(Atp2a2),ENSRNOG00000025111(Nfkbid),ENSRNOG00000011975(Crtc3),ENSRNOG00000009783(Camk2g),ENSR…	0.952053	1	1
GO:0005874	microtubule	cellular_component	4	301	276	19765	ENSRNOG00000006082(Rmdn2),ENSRNOG00000014584(Odf2),ENSRNOG00000025406(Iqgap2),ENSRNOG00000000417(Numa1),	0.951659	1	1
GO:0017038	protein import	biological_process	4	301	276	19765	ENSRNOG00000016655(Pex6),ENSRNOG00000017383(l7Rn6),ENSRNOG00000018009(Rab8b),ENSRNOG00000051711(Kpna1),	0.951659	1	1
GO:0033365	protein localization to organelle	biological_process	9	301	623	19765	ENSRNOG00000018009(Rab8b),ENSRNOG00000030118(Msn),ENSRNOG00000051711(Kpna1),ENSRNOG00000021555(Mis18a),ENSRNOG00000016133(Sumo1),ENSRNOG00000017383(l7Rn6),ENSRNOG00000000394(Srgn),ENSRNOG00000016655(Pex6),ENSRNOG00000019629(Lamp1),	0.948604	1	1
GO:0009888	tissue development	biological_process	23	301	1598	19765	ENSRNOG00000000417(Numa1),ENSRNOG00000016983(Myh7),ENSRNOG00000005957(Slc4a7),ENSRNOG00000036745(Gna13),ENSRNOG00000014265(Tnfrsf19),ENSRNOG00000001189(Sik1),ENSRNOG00000031916(Timeless),ENSRNOG00000013674(Megf10),ENSRNOG00000015602(Cdh2),ENSRNOG00000000841(Ddx39b),ENSRNOG00000020482(Nfatc4),ENSRNOG00000030118(Msn),ENSRNOG00000054989(Grhl1),ENSRNOG00000008022(Apaf1),ENSRNOG00000005616(Ncoa3),ENSR…	0.945108	1	1
GO:0006793	phosphorus metabolic process	biological_process	38	301	2642	19765	ENSRNOG00000011071(Nt5e),ENSRNOG00000038720(Cdkl1),ENSRNOG00000008065(Wwc1),ENSRNOG00000001426(Prkrip1),ENSRNOG00000017181(Malt1),ENSRNOG00000001453(Baz1b),ENSRNOG00000046276(Myh3),ENSRNOG00000001050(Eif2ak1),ENSRNOG00000038184(Camk2n2),ENSRNOG00000016448(Eef2k),ENSRNOG00000028814(Oasl2),ENSRNOG00000012818(Ksr1),ENSRNOG00000002265(Casr),ENSRNOG00000017600(Ptpn9),ENSRNOG00000014049(Riok1),ENSRNOG0…	0.944455	1	1
GO:0048878	chemical homeostasis	biological_process	13	301	904	19765	ENSRNOG00000027434(Fitm2),ENSRNOG00000001050(Eif2ak1),ENSRNOG00000005957(Slc4a7),ENSRNOG00000000457(Tap1),ENSRNOG00000021200(Hfe2),ENSRNOG00000036745(Gna13),ENSRNOG00000004585(Tmtc2),ENSRNOG00000002265(Casr),ENSRNOG00000006462(Ero1l),ENSRNOG00000001285(Atp2a2),ENSRNOG00000057221(Scn3b),ENSRNOG00000049115(Ccr5),ENSRNOG00000014935(Peo1),	0.94429	1	1
GO:0005911	cell-cell junction	cellular_component	5	301	348	19765	ENSRNOG00000015602(Cdh2),ENSRNOG00000001285(Atp2a2),ENSRNOG00000002215(Mylk),ENSRNOG00000026702(Amica1),ENSRNOG00000048932(Smagp),	0.943455	1	1
GO:0003006	developmental process involved in reproduction	biological_process	9	301	627	19765	ENSRNOG00000000934(Piwil1),ENSRNOG00000006965(Aff4),ENSRNOG00000015734(Ube3a),ENSRNOG00000013166(Wnt4),ENSRNOG00000009348(Nos3),ENSRNOG00000012358(Pcyt1b),ENSRNOG00000005616(Ncoa3),ENSRNOG00000060320(Lin28a),ENSRNOG00000014584(Odf2),	0.942552	1	1
GO:0006468	protein phosphorylation	biological_process	22	301	1535	19765	ENSRNOG00000014628(Pomk),ENSRNOG00000038184(Camk2n2),ENSRNOG00000009783(Camk2g),ENSRNOG00000016448(Eef2k),ENSRNOG00000027787(Cdc6),ENSRNOG00000001453(Baz1b),ENSRNOG00000001050(Eif2ak1),ENSRNOG00000008065(Wwc1),ENSRNOG00000001426(Prkrip1),ENSRNOG00000017181(Malt1),ENSRNOG00000038720(Cdkl1),ENSRNOG00000015602(Cdh2),ENSRNOG00000031162(Ccl24),ENSRNOG00000003063(Phka1),ENSRNOG00000001189(Sik1),ENSRNOG…	0.941119	1	1
GO:0000228	nuclear chromosome	cellular_component	6	301	420	19765	ENSRNOG00000005616(Ncoa3),ENSRNOG00000001453(Baz1b),ENSRNOG00000031916(Timeless),ENSRNOG00000032929(Incenp),ENSRNOG00000032224(Hist1h4b),ENSRNOG00000015787(P3h4),	0.938064	1	1
GO:0016482	cytosolic transport	biological_process	8	301	560	19765	ENSRNOG00000019318(Syt3),ENSRNOG00000019629(Lamp1),ENSRNOG00000001285(Atp2a2),ENSRNOG00000021555(Mis18a),ENSRNOG00000026748(Dennd2a),ENSRNOG00000003971(Gosr1),ENSRNOG00000018009(Rab8b),ENSRNOG00000030118(Msn),	0.938064	1	1
GO:0071396	cellular response to lipid	biological_process	7	301	491	19765	ENSRNOG00000021614(Kmt2e),ENSRNOG00000002265(Casr),ENSRNOG00000005616(Ncoa3),ENSRNOG00000030118(Msn),ENSRNOG00000009348(Nos3),ENSRNOG00000002593(Esrrg),ENSRNOG00000015734(Ube3a),	0.936153	1	1
GO:0001071	nucleic acid binding transcription factor activity	molecular_function	13	301	912	19765	ENSRNOG00000005616(Ncoa3),ENSRNOG00000009184(Foxp1),ENSRNOG00000002593(Esrrg),ENSRNOG00000016683(Zfp668),ENSRNOG00000000308(Zbtb24),ENSRNOG00000009139(Fubp3),ENSRNOG00000007408(Ebf4),ENSRNOG00000020482(Nfatc4),ENSRNOG00000004730(Meis2),ENSRNOG00000027317(Ylpm1),ENSRNOG00000019653(Csrnp2),ENSRNOG00000007887(Elk4),ENSRNOG00000054989(Grhl1),	0.936006	1	1
GO:0003700	transcription factor activity, sequence-specific DNA binding	molecular_function	13	301	912	19765	ENSRNOG00000000308(Zbtb24),ENSRNOG00000016683(Zfp668),ENSRNOG00000002593(Esrrg),ENSRNOG00000009184(Foxp1),ENSRNOG00000005616(Ncoa3),ENSRNOG00000054989(Grhl1),ENSRNOG00000007887(Elk4),ENSRNOG00000019653(Csrnp2),ENSRNOG00000027317(Ylpm1),ENSRNOG00000007408(Ebf4),ENSRNOG00000020482(Nfatc4),ENSRNOG00000004730(Meis2),ENSRNOG00000009139(Fubp3),	0.936006	1	1
GO:0009653	anatomical structure morphogenesis	biological_process	32	301	2251	19765	ENSRNOG00000002265(Casr),ENSRNOG00000008022(Apaf1),ENSRNOG00000005616(Ncoa3),ENSRNOG00000013166(Wnt4),ENSRNOG00000004276(Itga3),ENSRNOG00000031916(Timeless),ENSRNOG00000045524(Slc39a3),ENSRNOG00000019318(Syt3),ENSRNOG00000019692(Metrn),ENSRNOG00000001453(Baz1b),ENSRNOG00000004158(Hdac9),ENSRNOG00000005957(Slc4a7),ENSRNOG00000016448(Eef2k),ENSRNOG00000007744(Ehd3),ENSRNOG00000009184(Foxp1),ENSRNOG…	0.93348	1	1
GO:0045892	negative regulation of transcription, DNA-templated	biological_process	14	301	985	19765	ENSRNOG00000009184(Foxp1),ENSRNOG00000024194(Rsf1),ENSRNOG00000008065(Wwc1),ENSRNOG00000039859(Dnmt1),ENSRNOG00000025111(Nfkbid),ENSRNOG00000031916(Timeless),ENSRNOG00000016133(Sumo1),ENSRNOG00000032034(Supt5h),ENSRNOG00000001189(Sik1),ENSRNOG00000021200(Hfe2),ENSRNOG00000007887(Elk4),ENSRNOG00000004158(Hdac9),ENSRNOG00000027317(Ylpm1),ENSRNOG00000020482(Nfatc4),	0.933302	1	1
GO:0050790	regulation of catalytic activity	biological_process	25	301	1759	19765	ENSRNOG00000011560(Mtmr9),ENSRNOG00000001719(Psmd2),ENSRNOG00000028946(Cdc42ep4),ENSRNOG00000027787(Cdc6),ENSRNOG00000038184(Camk2n2),ENSRNOG00000036745(Gna13),ENSRNOG00000025222(Pcid2),ENSRNOG00000022893(Rimbp2),ENSRNOG00000025406(Iqgap2),ENSRNOG00000032703(Rasgrp3),ENSRNOG00000017181(Malt1),ENSRNOG00000009348(Nos3),ENSRNOG00000020377(Cideb),ENSRNOG00000002255(Fam162a),ENSRNOG00000001426(Prkrip1…	0.933264	1	1
GO:0040011	locomotion	biological_process	18	301	1267	19765	ENSRNOG00000026702(Amica1),ENSRNOG00000009348(Nos3),ENSRNOG00000008065(Wwc1),ENSRNOG00000049115(Ccr5),ENSRNOG00000036745(Gna13),ENSRNOG00000004158(Hdac9),ENSRNOG00000014628(Pomk),ENSRNOG00000002265(Casr),ENSRNOG00000009184(Foxp1),ENSRNOG00000002215(Mylk),ENSRNOG00000019220(Rhod),ENSRNOG00000013166(Wnt4),ENSRNOG00000004276(Itga3),ENSRNOG00000003261(Usp9x),ENSRNOG00000030118(Msn),ENSRNOG00000033101…	0.932881	1	1
GO:0006954	inflammatory response	biological_process	7	301	493	19765	ENSRNOG00000003622(Cybb),ENSRNOG00000011071(Nt5e),ENSRNOG00000001050(Eif2ak1),ENSRNOG00000049137(Zfp35),ENSRNOG00000006639(Scn9a),ENSRNOG00000049115(Ccr5),ENSRNOG00000031162(Ccl24),	0.932355	1	1
GO:0006796	phosphate-containing compound metabolic process	biological_process	37	301	2606	19765	ENSRNOG00000008065(Wwc1),ENSRNOG00000001426(Prkrip1),ENSRNOG00000017181(Malt1),ENSRNOG00000011071(Nt5e),ENSRNOG00000038720(Cdkl1),ENSRNOG00000038184(Camk2n2),ENSRNOG00000016448(Eef2k),ENSRNOG00000028814(Oasl2),ENSRNOG00000001453(Baz1b),ENSRNOG00000046276(Myh3),ENSRNOG00000001050(Eif2ak1),ENSRNOG00000014049(Riok1),ENSRNOG00000028913(LOC688970),ENSRNOG00000056011(AC139950.1),ENSRNOG00000012818(Ksr1…	0.932304	1	1
GO:0031252	cell leading edge	cellular_component	4	301	282	19765	ENSRNOG00000015602(Cdh2),ENSRNOG00000008065(Wwc1),ENSRNOG00000002215(Mylk),ENSRNOG00000025406(Iqgap2),	0.931411	1	1
GO:0007399	nervous system development	biological_process	27	301	1905	19765	ENSRNOG00000009826(Bche),ENSRNOG00000003261(Usp9x),ENSRNOG00000020482(Nfatc4),ENSRNOG00000015602(Cdh2),ENSRNOG00000013674(Megf10),ENSRNOG00000004019(Phlda1),ENSRNOG00000010649(Ctnnd2),ENSRNOG00000018700(Mobp),ENSRNOG00000013166(Wnt4),ENSRNOG00000019212(Tpp1),ENSRNOG00000004276(Itga3),ENSRNOG00000057221(Scn3b),ENSRNOG00000002827(Rbfox1),ENSRNOG00000026466(Lrrtm3),ENSRNOG00000009184(Foxp1),ENSRNOG0…	0.930677	1	1
GO:0040007	growth	biological_process	12	301	848	19765	ENSRNOG00000011321(Rftn1),ENSRNOG00000003261(Usp9x),ENSRNOG00000047080(Gng4),ENSRNOG00000000841(Ddx39b),ENSRNOG00000009184(Foxp1),ENSRNOG00000025757(Myh6),ENSRNOG00000027592(Rerg),ENSRNOG00000019318(Syt3),ENSRNOG00000005616(Ncoa3),ENSRNOG00000015734(Ube3a),ENSRNOG00000049115(Ccr5),ENSRNOG00000008065(Wwc1),	0.929214	1	1
GO:0048609	multicellular organismal reproductive process	biological_process	10	301	707	19765	ENSRNOG00000009571(Wipf3),ENSRNOG00000000934(Piwil1),ENSRNOG00000006965(Aff4),ENSRNOG00000004276(Itga3),ENSRNOG00000015734(Ube3a),ENSRNOG00000012358(Pcyt1b),ENSRNOG00000009348(Nos3),ENSRNOG00000013166(Wnt4),ENSRNOG00000060320(Lin28a),ENSRNOG00000014584(Odf2),	0.928776	1	1
GO:0019538	protein metabolic process	biological_process	70	301	4955	19765	ENSRNOG00000021614(Kmt2e),ENSRNOG00000001073(RGD1563482),ENSRNOG00000026466(Lrrtm3),ENSRNOG00000002265(Casr),ENSRNOG00000012818(Ksr1),ENSRNOG00000008022(Apaf1),ENSRNOG00000028913(LOC688970),ENSRNOG00000004019(Phlda1),ENSRNOG00000016133(Sumo1),ENSRNOG00000000841(Ddx39b),ENSRNOG00000019653(Csrnp2),ENSRNOG00000038720(Cdkl1),ENSRNOG00000017181(Malt1),ENSRNOG00000001050(Eif2ak1),ENSRNOG00000011859(Eif…	0.927651	1	1
GO:0007409	axonogenesis	biological_process	5	301	355	19765	ENSRNOG00000009184(Foxp1),ENSRNOG00000003261(Usp9x),ENSRNOG00000049115(Ccr5),ENSRNOG00000015602(Cdh2),ENSRNOG00000019692(Metrn),	0.924851	1	1
GO:0050794	regulation of cellular process	biological_process	138	301	9840	19765	ENSRNOG00000022893(Rimbp2),ENSRNOG00000059801(Lima1),ENSRNOG00000026569(LOC102555377),ENSRNOG00000049115(Ccr5),ENSRNOG00000006462(Ero1l),ENSRNOG00000003261(Usp9x),ENSRNOG00000018009(Rab8b),ENSRNOG00000018901(Rab14),ENSRNOG00000011321(Rftn1),ENSRNOG00000002827(Rbfox1),ENSRNOG00000014584(Odf2),ENSRNOG00000024194(Rsf1),ENSRNOG00000028662(Zfp69),ENSRNOG00000052023(AABR07002885.1),ENSRNOG00000001453(B…	0.920904	1	1
GO:0006464	cellular protein modification process	biological_process	43	301	3069	19765	ENSRNOG00000000230(Lmf1),ENSRNOG00000025423(Map3k13),ENSRNOG00000002215(Mylk),ENSRNOG00000017157(Trim69),ENSRNOG00000003261(Usp9x),ENSRNOG00000005234(Gxylt1),ENSRNOG00000003063(Phka1),ENSRNOG00000015602(Cdh2),ENSRNOG00000031162(Ccl24),ENSRNOG00000001189(Sik1),ENSRNOG00000015734(Ube3a),ENSRNOG00000010124(Trim2),ENSRNOG00000009783(Camk2g),ENSRNOG00000022893(Rimbp2),ENSRNOG00000005711(Ptprd),ENSRNOG…	0.92003	1	1
GO:0036211	protein modification process	biological_process	43	301	3069	19765	ENSRNOG00000011663(Rnf7),ENSRNOG00000027787(Cdc6),ENSRNOG00000014628(Pomk),ENSRNOG00000005711(Ptprd),ENSRNOG00000022893(Rimbp2),ENSRNOG00000009783(Camk2g),ENSRNOG00000010124(Trim2),ENSRNOG00000015734(Ube3a),ENSRNOG00000001189(Sik1),ENSRNOG00000015602(Cdh2),ENSRNOG00000031162(Ccl24),ENSRNOG00000003063(Phka1),ENSRNOG00000005234(Gxylt1),ENSRNOG00000003261(Usp9x),ENSRNOG00000017157(Trim69),ENSRNOG000…	0.92003	1	1
GO:0044267	cellular protein metabolic process	biological_process	60	301	4291	19765	ENSRNOG00000001453(Baz1b),ENSRNOG00000007887(Elk4),ENSRNOG00000039859(Dnmt1),ENSRNOG00000008065(Wwc1),ENSRNOG00000007203(Psmc6),ENSRNOG00000020377(Cideb),ENSRNOG00000001426(Prkrip1),ENSRNOG00000052061(Ppef2),ENSRNOG00000016953(Chst4),ENSRNOG00000012037(Galnt7),ENSRNOG00000005616(Ncoa3),ENSRNOG00000050828(Vkorc1),ENSRNOG00000017600(Ptpn9),ENSRNOG00000014049(Riok1),ENSRNOG00000001719(Psmd2),ENSRNOG…	0.91817	1	1
GO:1903507	negative regulation of nucleic acid-templated transcription	biological_process	14	301	1002	19765	ENSRNOG00000016133(Sumo1),ENSRNOG00000032034(Supt5h),ENSRNOG00000001189(Sik1),ENSRNOG00000025111(Nfkbid),ENSRNOG00000031916(Timeless),ENSRNOG00000027317(Ylpm1),ENSRNOG00000020482(Nfatc4),ENSRNOG00000021200(Hfe2),ENSRNOG00000007887(Elk4),ENSRNOG00000004158(Hdac9),ENSRNOG00000024194(Rsf1),ENSRNOG00000009184(Foxp1),ENSRNOG00000008065(Wwc1),ENSRNOG00000039859(Dnmt1),	0.917467	1	1
GO:0019637	organophosphate metabolic process	biological_process	12	301	859	19765	ENSRNOG00000005193(Pfas),ENSRNOG00000025757(Myh6),ENSRNOG00000011071(Nt5e),ENSRNOG00000018326(Pgls),ENSRNOG00000056011(AC139950.1),ENSRNOG00000011820(Acpp),ENSRNOG00000016983(Myh7),ENSRNOG00000027434(Fitm2),ENSRNOG00000052506(Ak3),ENSRNOG00000046276(Myh3),ENSRNOG00000028814(Oasl2),ENSRNOG00000003063(Phka1),	0.917315	1	1
GO:0000976	transcription regulatory region sequence-specific DNA binding	molecular_function	8	301	573	19765	ENSRNOG00000009139(Fubp3),ENSRNOG00000020482(Nfatc4),ENSRNOG00000004730(Meis2),ENSRNOG00000007408(Ebf4),ENSRNOG00000054989(Grhl1),ENSRNOG00000028856(Pknox2),ENSRNOG00000009184(Foxp1),ENSRNOG00000002593(Esrrg),	0.916781	1	1
GO:0072594	establishment of protein localization to organelle	biological_process	6	301	430	19765	ENSRNOG00000021555(Mis18a),ENSRNOG00000016655(Pex6),ENSRNOG00000017383(l7Rn6),ENSRNOG00000018009(Rab8b),ENSRNOG00000019629(Lamp1),ENSRNOG00000051711(Kpna1),	0.916248	1	1
GO:0019787	ubiquitin-like protein transferase activity	molecular_function	5	301	359	19765	ENSRNOG00000015734(Ube3a),ENSRNOG00000017181(Malt1),ENSRNOG00000011663(Rnf7),ENSRNOG00000017157(Trim69),ENSRNOG00000010124(Trim2),	0.914547	1	1
GO:0023051	regulation of signaling	biological_process	33	301	2376	19765	ENSRNOG00000015734(Ube3a),ENSRNOG00000011820(Acpp),ENSRNOG00000002255(Fam162a),ENSRNOG00000013171(Grm2),ENSRNOG00000009783(Camk2g),ENSRNOG00000025111(Nfkbid),ENSRNOG00000011975(Crtc3),ENSRNOG00000001285(Atp2a2),ENSRNOG00000025423(Map3k13),ENSRNOG00000020482(Nfatc4),ENSRNOG00000031162(Ccl24),ENSRNOG00000015602(Cdh2),ENSRNOG00000009826(Bche),ENSRNOG00000021200(Hfe2),ENSRNOG00000018009(Rab8b),ENSRNO…	0.912006	1	1
GO:0006605	protein targeting	biological_process	7	301	504	19765	ENSRNOG00000021555(Mis18a),ENSRNOG00000016655(Pex6),ENSRNOG00000018009(Rab8b),ENSRNOG00000019220(Rhod),ENSRNOG00000017383(l7Rn6),ENSRNOG00000007744(Ehd3),ENSRNOG00000051711(Kpna1),	0.912006	1	1
GO:0001667	ameboidal-type cell migration	biological_process	4	301	288	19765	ENSRNOG00000004158(Hdac9),ENSRNOG00000009348(Nos3),ENSRNOG00000049115(Ccr5),ENSRNOG00000004276(Itga3),	0.912006	1	1
GO:0060322	head development	biological_process	10	301	723	19765	ENSRNOG00000015602(Cdh2),ENSRNOG00000014628(Pomk),ENSRNOG00000005957(Slc4a7),ENSRNOG00000003261(Usp9x),ENSRNOG00000004019(Phlda1),ENSRNOG00000039859(Dnmt1),ENSRNOG00000049115(Ccr5),ENSRNOG00000013166(Wnt4),ENSRNOG00000008022(Apaf1),ENSRNOG00000011071(Nt5e),	0.908222	1	1
GO:1902679	negative regulation of RNA biosynthetic process	biological_process	14	301	1015	19765	ENSRNOG00000016133(Sumo1),ENSRNOG00000032034(Supt5h),ENSRNOG00000001189(Sik1),ENSRNOG00000025111(Nfkbid),ENSRNOG00000031916(Timeless),ENSRNOG00000027317(Ylpm1),ENSRNOG00000020482(Nfatc4),ENSRNOG00000021200(Hfe2),ENSRNOG00000007887(Elk4),ENSRNOG00000004158(Hdac9),ENSRNOG00000024194(Rsf1),ENSRNOG00000009184(Foxp1),ENSRNOG00000008065(Wwc1),ENSRNOG00000039859(Dnmt1),	0.905717	1	1
GO:0000904	cell morphogenesis involved in differentiation	biological_process	9	301	654	19765	ENSRNOG00000013166(Wnt4),ENSRNOG00000049115(Ccr5),ENSRNOG00000019692(Metrn),ENSRNOG00000009184(Foxp1),ENSRNOG00000016448(Eef2k),ENSRNOG00000003261(Usp9x),ENSRNOG00000020482(Nfatc4),ENSRNOG00000015602(Cdh2),ENSRNOG00000010649(Ctnnd2),	0.903639	1	1
GO:0019953	sexual reproduction	biological_process	9	301	654	19765	ENSRNOG00000006965(Aff4),ENSRNOG00000000934(Piwil1),ENSRNOG00000009571(Wipf3),ENSRNOG00000014584(Odf2),ENSRNOG00000060320(Lin28a),ENSRNOG00000009348(Nos3),ENSRNOG00000012358(Pcyt1b),ENSRNOG00000013166(Wnt4),ENSRNOG00000015734(Ube3a),	0.903639	1	1
GO:0010629	negative regulation of gene expression	biological_process	17	301	1240	19765	ENSRNOG00000009184(Foxp1),ENSRNOG00000024194(Rsf1),ENSRNOG00000013166(Wnt4),ENSRNOG00000031916(Timeless),ENSRNOG00000032034(Supt5h),ENSRNOG00000016133(Sumo1),ENSRNOG00000001189(Sik1),ENSRNOG00000021200(Hfe2),ENSRNOG00000020482(Nfatc4),ENSRNOG00000060320(Lin28a),ENSRNOG00000039859(Dnmt1),ENSRNOG00000008065(Wwc1),ENSRNOG00000001050(Eif2ak1),ENSRNOG00000025111(Nfkbid),ENSRNOG00000004158(Hdac9),ENSRN…	0.900238	1	1
GO:0008283	cell proliferation	biological_process	22	301	1608	19765	ENSRNOG00000060320(Lin28a),ENSRNOG00000026702(Amica1),ENSRNOG00000024450(Poc1b),ENSRNOG00000049115(Ccr5),ENSRNOG00000039859(Dnmt1),ENSRNOG00000009348(Nos3),ENSRNOG00000017181(Malt1),ENSRNOG00000027787(Cdc6),ENSRNOG00000001050(Eif2ak1),ENSRNOG00000011859(Eif5a2),ENSRNOG00000005616(Ncoa3),ENSRNOG00000009184(Foxp1),ENSRNOG00000027592(Rerg),ENSRNOG00000002265(Casr),ENSRNOG00000013166(Wnt4),ENSRNOG000…	0.898394	1	1
GO:0030234	enzyme regulator activity	molecular_function	10	301	731	19765	ENSRNOG00000008022(Apaf1),ENSRNOG00000032703(Rasgrp3),ENSRNOG00000025406(Iqgap2),ENSRNOG00000001426(Prkrip1),ENSRNOG00000017181(Malt1),ENSRNOG00000011560(Mtmr9),ENSRNOG00000018144(Depdc5),ENSRNOG00000001719(Psmd2),ENSRNOG00000028946(Cdc42ep4),ENSRNOG00000038184(Camk2n2),	0.898283	1	1
GO:0005815	microtubule organizing center	cellular_component	7	301	512	19765	ENSRNOG00000053230(Fopnl),ENSRNOG00000043204(Harbi1),ENSRNOG00000024450(Poc1b),ENSRNOG00000014584(Odf2),ENSRNOG00000010999(Cep295),ENSRNOG00000038184(Camk2n2),ENSRNOG00000024266(Haus5),	0.897756	1	1
GO:0006897	endocytosis	biological_process	6	301	439	19765	ENSRNOG00000001050(Eif2ak1),ENSRNOG00000013674(Megf10),ENSRNOG00000015734(Ube3a),ENSRNOG00000016448(Eef2k),ENSRNOG00000009571(Wipf3),ENSRNOG00000018901(Rab14),	0.897464	1	1
GO:0048699	generation of neurons	biological_process	17	301	1245	19765	ENSRNOG00000019692(Metrn),ENSRNOG00000039859(Dnmt1),ENSRNOG00000049115(Ccr5),ENSRNOG00000019318(Syt3),ENSRNOG00000060320(Lin28a),ENSRNOG00000014628(Pomk),ENSRNOG00000016448(Eef2k),ENSRNOG00000004158(Hdac9),ENSRNOG00000005957(Slc4a7),ENSRNOG00000004276(Itga3),ENSRNOG00000009184(Foxp1),ENSRNOG00000015602(Cdh2),ENSRNOG00000020482(Nfatc4),ENSRNOG00000003261(Usp9x),ENSRNOG00000009826(Bche),ENSRNOG0000…	0.896623	1	1
GO:0070201	regulation of establishment of protein localization	biological_process	9	301	660	19765	ENSRNOG00000047620(Golph3l),ENSRNOG00000002265(Casr),ENSRNOG00000049115(Ccr5),ENSRNOG00000004276(Itga3),ENSRNOG00000000394(Srgn),ENSRNOG00000019727(Dph3),ENSRNOG00000021555(Mis18a),ENSRNOG00000033101(Myo18a),ENSRNOG00000058940(Rab11fip1),	0.895424	1	1
GO:0048646	anatomical structure formation involved in morphogenesis	biological_process	14	301	1027	19765	ENSRNOG00000004158(Hdac9),ENSRNOG00000036745(Gna13),ENSRNOG00000007744(Ehd3),ENSRNOG00000009348(Nos3),ENSRNOG00000049115(Ccr5),ENSRNOG00000024450(Poc1b),ENSRNOG00000020482(Nfatc4),ENSRNOG00000031162(Ccl24),ENSRNOG00000013166(Wnt4),ENSRNOG00000004276(Itga3),ENSRNOG00000025757(Myh6),ENSRNOG00000009184(Foxp1),ENSRNOG00000014584(Odf2),ENSRNOG00000008022(Apaf1),	0.895134	1	1
GO:0031175	neuron projection development	biological_process	10	301	734	19765	ENSRNOG00000010649(Ctnnd2),ENSRNOG00000015602(Cdh2),ENSRNOG00000020482(Nfatc4),ENSRNOG00000003261(Usp9x),ENSRNOG00000016448(Eef2k),ENSRNOG00000019318(Syt3),ENSRNOG00000009184(Foxp1),ENSRNOG00000049115(Ccr5),ENSRNOG00000019692(Metrn),ENSRNOG00000004276(Itga3),	0.894611	1	1
GO:0003690	double-stranded DNA binding	molecular_function	9	301	661	19765	ENSRNOG00000009184(Foxp1),ENSRNOG00000028856(Pknox2),ENSRNOG00000039859(Dnmt1),ENSRNOG00000002593(Esrrg),ENSRNOG00000009139(Fubp3),ENSRNOG00000054989(Grhl1),ENSRNOG00000007408(Ebf4),ENSRNOG00000020482(Nfatc4),ENSRNOG00000004730(Meis2),	0.89407	1	1
GO:0009890	negative regulation of biosynthetic process	biological_process	17	301	1250	19765	ENSRNOG00000020482(Nfatc4),ENSRNOG00000021200(Hfe2),ENSRNOG00000016133(Sumo1),ENSRNOG00000032034(Supt5h),ENSRNOG00000001189(Sik1),ENSRNOG00000031916(Timeless),ENSRNOG00000013166(Wnt4),ENSRNOG00000024194(Rsf1),ENSRNOG00000009184(Foxp1),ENSRNOG00000027317(Ylpm1),ENSRNOG00000007887(Elk4),ENSRNOG00000004158(Hdac9),ENSRNOG00000025111(Nfkbid),ENSRNOG00000001050(Eif2ak1),ENSRNOG00000008065(Wwc1),ENSRNOG…	0.893037	1	1
GO:0005576	extracellular region	cellular_component	47	301	3458	19765	ENSRNOG00000009620(Cybrd1),ENSRNOG00000012037(Galnt7),ENSRNOG00000032224(Hist1h4b),ENSRNOG00000020167(Reep5),ENSRNOG00000013166(Wnt4),ENSRNOG00000000394(Srgn),ENSRNOG00000033206(Entpd5),ENSRNOG00000004276(Itga3),ENSRNOG00000019212(Tpp1),ENSRNOG00000021614(Kmt2e),ENSRNOG00000008022(Apaf1),ENSRNOG00000005616(Ncoa3),ENSRNOG00000018574(Qsox2),ENSRNOG00000047080(Gng4),ENSRNOG00000036760(Tmc5),ENSRNOG0…	0.89249	1	1
GO:0009259	ribonucleotide metabolic process	biological_process	6	301	442	19765	ENSRNOG00000046276(Myh3),ENSRNOG00000011071(Nt5e),ENSRNOG00000052506(Ak3),ENSRNOG00000025757(Myh6),ENSRNOG00000005193(Pfas),ENSRNOG00000016983(Myh7),	0.891373	1	1
GO:0044297	cell body	cellular_component	7	301	516	19765	ENSRNOG00000020444(Hcn3),ENSRNOG00000010649(Ctnnd2),ENSRNOG00000000417(Numa1),ENSRNOG00000013610(Chrna5),ENSRNOG00000039859(Dnmt1),ENSRNOG00000019629(Lamp1),ENSRNOG00000002265(Casr),	0.890797	1	1
GO:0012501	programmed cell death	biological_process	20	301	1476	19765	ENSRNOG00000004019(Phlda1),ENSRNOG00000001189(Sik1),ENSRNOG00000033101(Myo18a),ENSRNOG00000020482(Nfatc4),ENSRNOG00000002265(Casr),ENSRNOG00000008022(Apaf1),ENSRNOG00000017157(Trim69),ENSRNOG00000000394(Srgn),ENSRNOG00000013166(Wnt4),ENSRNOG00000025111(Nfkbid),ENSRNOG00000016448(Eef2k),ENSRNOG00000005957(Slc4a7),ENSRNOG00000025222(Pcid2),ENSRNOG00000002866(Rassf6),ENSRNOG00000006462(Ero1l),ENSRNO…	0.889762	1	1
GO:0030099	myeloid cell differentiation	biological_process	4	301	298	19765	ENSRNOG00000021614(Kmt2e),ENSRNOG00000001050(Eif2ak1),ENSRNOG00000032224(Hist1h4b),ENSRNOG00000004730(Meis2),	0.881402	1	1
GO:0044255	cellular lipid metabolic process	biological_process	10	301	745	19765	ENSRNOG00000012436(Adh6),ENSRNOG00000036866(Acer3),ENSRNOG00000000230(Lmf1),ENSRNOG00000019630(Hacl1),ENSRNOG00000008064(Naga),ENSRNOG00000022268(Pnpla3),ENSRNOG00000003063(Phka1),ENSRNOG00000027434(Fitm2),ENSRNOG00000007102(Acss1),ENSRNOG00000001189(Sik1),	0.881402	1	1
GO:0030182	neuron differentiation	biological_process	15	301	1118	19765	ENSRNOG00000009184(Foxp1),ENSRNOG00000004276(Itga3),ENSRNOG00000010649(Ctnnd2),ENSRNOG00000004019(Phlda1),ENSRNOG00000020482(Nfatc4),ENSRNOG00000015602(Cdh2),ENSRNOG00000003261(Usp9x),ENSRNOG00000019318(Syt3),ENSRNOG00000060320(Lin28a),ENSRNOG00000019692(Metrn),ENSRNOG00000049115(Ccr5),ENSRNOG00000039859(Dnmt1),ENSRNOG00000016448(Eef2k),ENSRNOG00000005957(Slc4a7),ENSRNOG00000004158(Hdac9),	0.881008	1	1
GO:0016020	membrane	cellular_component	123	301	9170	19765	ENSRNOG00000031544(Larp1),ENSRNOG00000006639(Scn9a),ENSRNOG00000013674(Megf10),ENSRNOG00000060693(AC118147.2),ENSRNOG00000057141(AABR07035641.1),ENSRNOG00000021200(Hfe2),ENSRNOG00000015602(Cdh2),ENSRNOG00000025423(Map3k13),ENSRNOG00000026488(Gltpd2),ENSRNOG00000027276(Xkr4),ENSRNOG00000017157(Trim69),ENSRNOG00000019220(Rhod),ENSRNOG00000002509(Gnl3l),ENSRNOG00000000230(Lmf1),ENSRNOG00000015150(Sp…	0.880777	1	1
GO:1990837	sequence-specific double-stranded DNA binding	molecular_function	8	301	597	19765	ENSRNOG00000009139(Fubp3),ENSRNOG00000054989(Grhl1),ENSRNOG00000004730(Meis2),ENSRNOG00000020482(Nfatc4),ENSRNOG00000007408(Ebf4),ENSRNOG00000009184(Foxp1),ENSRNOG00000028856(Pknox2),ENSRNOG00000002593(Esrrg),	0.879926	1	1
GO:0051222	positive regulation of protein transport	biological_process	5	301	374	19765	ENSRNOG00000049115(Ccr5),ENSRNOG00000033101(Myo18a),ENSRNOG00000021555(Mis18a),ENSRNOG00000002265(Casr),ENSRNOG00000047620(Golph3l),	0.877867	1	1
GO:0016071	mRNA metabolic process	biological_process	5	301	376	19765	ENSRNOG00000002827(Rbfox1),ENSRNOG00000032034(Supt5h),ENSRNOG00000052968(Hnrnpa3),ENSRNOG00000007629(Sf3a3),ENSRNOG00000000841(Ddx39b),	0.873197	1	1
GO:0005887	integral component of plasma membrane	cellular_component	17	301	1281	19765	ENSRNOG00000019208(P2rx5),ENSRNOG00000005957(Slc4a7),ENSRNOG00000015741(Slc2a13),ENSRNOG00000002549(Htr5b),ENSRNOG00000013610(Chrna5),ENSRNOG00000013171(Grm2),ENSRNOG00000003622(Cybb),ENSRNOG00000005491(Best3),ENSRNOG00000021200(Hfe2),ENSRNOG00000020444(Hcn3),ENSRNOG00000016133(Sumo1),ENSRNOG00000006639(Scn9a),ENSRNOG00000048932(Smagp),ENSRNOG00000004276(Itga3),ENSRNOG00000015746(Kcng4),ENSRNOG00…	0.871425	1	1
GO:0050896	response to stimulus	biological_process	108	301	8172	19765	ENSRNOG00000047080(Gng4),ENSRNOG00000018144(Depdc5),ENSRNOG00000001453(Baz1b),ENSRNOG00000007203(Psmc6),ENSRNOG00000020377(Cideb),ENSRNOG00000039859(Dnmt1),ENSRNOG00000008065(Wwc1),ENSRNOG00000025406(Iqgap2),ENSRNOG00000019318(Syt3),ENSRNOG00000026702(Amica1),ENSRNOG00000036699(RGD1306926),ENSRNOG00000038999(RT1-A1),ENSRNOG00000008865(Stac),ENSRNOG00000052061(Ppef2),ENSRNOG00000000394(Srgn),ENSRN…	0.867812	1	1
GO:0006915	apoptotic process	biological_process	19	301	1450	19765	ENSRNOG00000001189(Sik1),ENSRNOG00000004019(Phlda1),ENSRNOG00000020482(Nfatc4),ENSRNOG00000033101(Myo18a),ENSRNOG00000017157(Trim69),ENSRNOG00000008022(Apaf1),ENSRNOG00000002265(Casr),ENSRNOG00000013166(Wnt4),ENSRNOG00000000394(Srgn),ENSRNOG00000025111(Nfkbid),ENSRNOG00000025222(Pcid2),ENSRNOG00000016448(Eef2k),ENSRNOG00000006462(Ero1l),ENSRNOG00000002866(Rassf6),ENSRNOG00000049115(Ccr5),ENSRNOG0…	0.860431	1	1
GO:0043410	positive regulation of MAPK cascade	biological_process	5	301	382	19765	ENSRNOG00000015602(Cdh2),ENSRNOG00000031162(Ccl24),ENSRNOG00000008065(Wwc1),ENSRNOG00000025423(Map3k13),ENSRNOG00000012818(Ksr1),	0.859482	1	1
GO:0006886	intracellular protein transport	biological_process	11	301	841	19765	ENSRNOG00000051711(Kpna1),ENSRNOG00000007744(Ehd3),ENSRNOG00000018901(Rab14),ENSRNOG00000018009(Rab8b),ENSRNOG00000000457(Tap1),ENSRNOG00000011321(Rftn1),ENSRNOG00000021555(Mis18a),ENSRNOG00000017383(l7Rn6),ENSRNOG00000019220(Rhod),ENSRNOG00000016655(Pex6),ENSRNOG00000018714(Arl5b),	0.858869	1	1
GO:0007283	spermatogenesis	biological_process	5	301	383	19765	ENSRNOG00000009571(Wipf3),ENSRNOG00000012358(Pcyt1b),ENSRNOG00000006965(Aff4),ENSRNOG00000014584(Odf2),ENSRNOG00000000934(Piwil1),	0.857238	1	1
GO:0048232	male gamete generation	biological_process	5	301	384	19765	ENSRNOG00000000934(Piwil1),ENSRNOG00000014584(Odf2),ENSRNOG00000006965(Aff4),ENSRNOG00000012358(Pcyt1b),ENSRNOG00000009571(Wipf3),	0.855006	1	1
GO:0061564	axon development	biological_process	5	301	385	19765	ENSRNOG00000015602(Cdh2),ENSRNOG00000049115(Ccr5),ENSRNOG00000019692(Metrn),ENSRNOG00000003261(Usp9x),ENSRNOG00000009184(Foxp1),	0.852785	1	1
GO:0001655	urogenital system development	biological_process	4	301	308	19765	ENSRNOG00000060320(Lin28a),ENSRNOG00000004276(Itga3),ENSRNOG00000015734(Ube3a),ENSRNOG00000013166(Wnt4),	0.852785	1	1
GO:0006518	peptide metabolic process	biological_process	12	301	926	19765	ENSRNOG00000020658(Aarsd1),ENSRNOG00000019212(Tpp1),ENSRNOG00000001073(RGD1563482),ENSRNOG00000026466(Lrrtm3),ENSRNOG00000060320(Lin28a),ENSRNOG00000001161(Gatc),ENSRNOG00000011859(Eif5a2),ENSRNOG00000019165(Mrpl51),ENSRNOG00000000841(Ddx39b),ENSRNOG00000031544(Larp1),ENSRNOG00000001050(Eif2ak1),ENSRNOG00000029115(RGD1564883),	0.850943	1	1
GO:0051223	regulation of protein transport	biological_process	8	301	618	19765	ENSRNOG00000058940(Rab11fip1),ENSRNOG00000033101(Myo18a),ENSRNOG00000021555(Mis18a),ENSRNOG00000019727(Dph3),ENSRNOG00000000394(Srgn),ENSRNOG00000049115(Ccr5),ENSRNOG00000002265(Casr),ENSRNOG00000047620(Golph3l),	0.850025	1	1
GO:0006508	proteolysis	biological_process	19	301	1469	19765	ENSRNOG00000011663(Rnf7),ENSRNOG00000001719(Psmd2),ENSRNOG00000025222(Pcid2),ENSRNOG00000034134(Cpm),ENSRNOG00000020377(Cideb),ENSRNOG00000002255(Fam162a),ENSRNOG00000017181(Malt1),ENSRNOG00000007203(Psmc6),ENSRNOG00000015734(Ube3a),ENSRNOG00000016133(Sumo1),ENSRNOG00000021200(Hfe2),ENSRNOG00000003261(Usp9x),ENSRNOG00000023312(Lonrf2),ENSRNOG00000019044(Adam30),ENSRNOG00000005749(Foxred2),ENSRNOG…	0.849302	1	1
GO:0004175	endopeptidase activity	molecular_function	6	301	466	19765	ENSRNOG00000019212(Tpp1),ENSRNOG00000019044(Adam30),ENSRNOG00000015150(Spg7),ENSRNOG00000017181(Malt1),ENSRNOG00000003261(Usp9x),ENSRNOG00000001719(Psmd2),	0.845465	1	1
GO:0048523	negative regulation of cellular process	biological_process	46	301	3584	19765	ENSRNOG00000019653(Csrnp2),ENSRNOG00000033101(Myo18a),ENSRNOG00000000841(Ddx39b),ENSRNOG00000001187(Oasl),ENSRNOG00000016133(Sumo1),ENSRNOG00000052061(Ppef2),ENSRNOG00000032224(Hist1h4b),ENSRNOG00000031916(Timeless),ENSRNOG00000004276(Itga3),ENSRNOG00000000394(Srgn),ENSRNOG00000013166(Wnt4),ENSRNOG00000005616(Ncoa3),ENSRNOG00000059765(Asic1),ENSRNOG00000027317(Ylpm1),ENSRNOG00000038184(Camk2n2),E…	0.842792	1	1
GO:0030162	regulation of proteolysis	biological_process	8	301	625	19765	ENSRNOG00000020377(Cideb),ENSRNOG00000002255(Fam162a),ENSRNOG00000007203(Psmc6),ENSRNOG00000015734(Ube3a),ENSRNOG00000008022(Apaf1),ENSRNOG00000003261(Usp9x),ENSRNOG00000025222(Pcid2),ENSRNOG00000016133(Sumo1),	0.840505	1	1
GO:0051716	cellular response to stimulus	biological_process	88	301	6875	19765	ENSRNOG00000015734(Ube3a),ENSRNOG00000019629(Lamp1),ENSRNOG00000011820(Acpp),ENSRNOG00000002549(Htr5b),ENSRNOG00000002255(Fam162a),ENSRNOG00000028946(Cdc42ep4),ENSRNOG00000027787(Cdc6),ENSRNOG00000025111(Nfkbid),ENSRNOG00000002593(Esrrg),ENSRNOG00000019220(Rhod),ENSRNOG00000002215(Mylk),ENSRNOG00000025423(Map3k13),ENSRNOG00000054385(Rhebl1),ENSRNOG00000027592(Rerg),ENSRNOG00000005749(Foxred2),ENS…	0.840505	1	1
GO:0031226	intrinsic component of plasma membrane	cellular_component	17	301	1330	19765	ENSRNOG00000015741(Slc2a13),ENSRNOG00000019208(P2rx5),ENSRNOG00000005957(Slc4a7),ENSRNOG00000005491(Best3),ENSRNOG00000003622(Cybb),ENSRNOG00000013610(Chrna5),ENSRNOG00000013171(Grm2),ENSRNOG00000002549(Htr5b),ENSRNOG00000006639(Scn9a),ENSRNOG00000048932(Smagp),ENSRNOG00000016133(Sumo1),ENSRNOG00000021200(Hfe2),ENSRNOG00000020444(Hcn3),ENSRNOG00000059765(Asic1),ENSRNOG00000001285(Atp2a2),ENSRNOG0…	0.83932	1	1
GO:0007568	aging	biological_process	4	301	313	19765	ENSRNOG00000006462(Ero1l),ENSRNOG00000008022(Apaf1),ENSRNOG00000049115(Ccr5),ENSRNOG00000039859(Dnmt1),	0.839162	1	1
GO:0005635	nuclear envelope	cellular_component	4	301	313	19765	ENSRNOG00000016133(Sumo1),ENSRNOG00000019830(Hsd17b1),ENSRNOG00000051711(Kpna1),ENSRNOG00000009826(Bche),	0.839162	1	1
GO:0042127	regulation of cell proliferation	biological_process	17	301	1334	19765	ENSRNOG00000036866(Acer3),ENSRNOG00000009184(Foxp1),ENSRNOG00000027592(Rerg),ENSRNOG00000002265(Casr),ENSRNOG00000005616(Ncoa3),ENSRNOG00000009826(Bche),ENSRNOG00000031162(Ccl24),ENSRNOG00000000841(Ddx39b),ENSRNOG00000015602(Cdh2),ENSRNOG00000009348(Nos3),ENSRNOG00000049115(Ccr5),ENSRNOG00000039859(Dnmt1),ENSRNOG00000060320(Lin28a),ENSRNOG00000026702(Amica1),ENSRNOG00000011859(Eif5a2),ENSRNOG0000…	0.836803	1	1
GO:0009790	embryo development	biological_process	12	301	946	19765	ENSRNOG00000045524(Slc39a3),ENSRNOG00000036745(Gna13),ENSRNOG00000003261(Usp9x),ENSRNOG00000018901(Rab14),ENSRNOG00000003174(Tapt1),ENSRNOG00000009184(Foxp1),ENSRNOG00000025757(Myh6),ENSRNOG00000005616(Ncoa3),ENSRNOG00000008022(Apaf1),ENSRNOG00000009348(Nos3),ENSRNOG00000013166(Wnt4),ENSRNOG00000004276(Itga3),	0.832953	1	1
GO:0048666	neuron development	biological_process	11	301	868	19765	ENSRNOG00000010649(Ctnnd2),ENSRNOG00000003261(Usp9x),ENSRNOG00000016448(Eef2k),ENSRNOG00000005957(Slc4a7),ENSRNOG00000015602(Cdh2),ENSRNOG00000020482(Nfatc4),ENSRNOG00000009184(Foxp1),ENSRNOG00000019318(Syt3),ENSRNOG00000004276(Itga3),ENSRNOG00000019692(Metrn),ENSRNOG00000049115(Ccr5),	0.832153	1	1
GO:0022008	neurogenesis	biological_process	17	301	1342	19765	ENSRNOG00000004019(Phlda1),ENSRNOG00000010649(Ctnnd2),ENSRNOG00000003261(Usp9x),ENSRNOG00000009826(Bche),ENSRNOG00000015602(Cdh2),ENSRNOG00000020482(Nfatc4),ENSRNOG00000009184(Foxp1),ENSRNOG00000004276(Itga3),ENSRNOG00000004158(Hdac9),ENSRNOG00000005957(Slc4a7),ENSRNOG00000016448(Eef2k),ENSRNOG00000014628(Pomk),ENSRNOG00000019318(Syt3),ENSRNOG00000060320(Lin28a),ENSRNOG00000019692(Metrn),ENSRNOG0…	0.831815	1	1
GO:0009967	positive regulation of signal transduction	biological_process	14	301	1107	19765	ENSRNOG00000015734(Ube3a),ENSRNOG00000008065(Wwc1),ENSRNOG00000011820(Acpp),ENSRNOG00000020377(Cideb),ENSRNOG00000002255(Fam162a),ENSRNOG00000017181(Malt1),ENSRNOG00000014265(Tnfrsf19),ENSRNOG00000013166(Wnt4),ENSRNOG00000008022(Apaf1),ENSRNOG00000012818(Ksr1),ENSRNOG00000025423(Map3k13),ENSRNOG00000015602(Cdh2),ENSRNOG00000031162(Ccl24),ENSRNOG00000020482(Nfatc4),	0.830445	1	1
GO:0008219	cell death	biological_process	20	301	1582	19765	ENSRNOG00000006462(Ero1l),ENSRNOG00000002866(Rassf6),ENSRNOG00000049115(Ccr5),ENSRNOG00000019629(Lamp1),ENSRNOG00000017181(Malt1),ENSRNOG00000002255(Fam162a),ENSRNOG00000020377(Cideb),ENSRNOG00000025111(Nfkbid),ENSRNOG00000025222(Pcid2),ENSRNOG00000005957(Slc4a7),ENSRNOG00000016448(Eef2k),ENSRNOG00000017157(Trim69),ENSRNOG00000008022(Apaf1),ENSRNOG00000002265(Casr),ENSRNOG00000013166(Wnt4),ENSRNO…	0.830145	1	1
GO:0009314	response to radiation	biological_process	5	301	396	19765	ENSRNOG00000039859(Dnmt1),ENSRNOG00000004730(Meis2),ENSRNOG00000020482(Nfatc4),ENSRNOG00000049115(Ccr5),ENSRNOG00000001189(Sik1),	0.829097	1	1
GO:0007417	central nervous system development	biological_process	11	301	878	19765	ENSRNOG00000004019(Phlda1),ENSRNOG00000015602(Cdh2),ENSRNOG00000014628(Pomk),ENSRNOG00000005957(Slc4a7),ENSRNOG00000003261(Usp9x),ENSRNOG00000008022(Apaf1),ENSRNOG00000011071(Nt5e),ENSRNOG00000009184(Foxp1),ENSRNOG00000039859(Dnmt1),ENSRNOG00000049115(Ccr5),ENSRNOG00000013166(Wnt4),	0.822675	1	1
GO:0023057	negative regulation of signaling	biological_process	12	301	958	19765	ENSRNOG00000011975(Crtc3),ENSRNOG00000025111(Nfkbid),ENSRNOG00000052061(Ppef2),ENSRNOG00000018144(Depdc5),ENSRNOG00000021200(Hfe2),ENSRNOG00000058940(Rab11fip1),ENSRNOG00000009826(Bche),ENSRNOG00000015602(Cdh2),ENSRNOG00000059765(Asic1),ENSRNOG00000013166(Wnt4),ENSRNOG00000008065(Wwc1),ENSRNOG00000004276(Itga3),	0.822519	1	1
GO:0044092	negative regulation of molecular function	biological_process	11	301	880	19765	ENSRNOG00000009348(Nos3),ENSRNOG00000001426(Prkrip1),ENSRNOG00000024194(Rsf1),ENSRNOG00000019653(Csrnp2),ENSRNOG00000038184(Camk2n2),ENSRNOG00000020482(Nfatc4),ENSRNOG00000025222(Pcid2),ENSRNOG00000022893(Rimbp2),ENSRNOG00000016133(Sumo1),ENSRNOG00000001189(Sik1),ENSRNOG00000025111(Nfkbid),	0.820806	1	1
GO:0008233	peptidase activity	molecular_function	8	301	645	19765	ENSRNOG00000023312(Lonrf2),ENSRNOG00000003261(Usp9x),ENSRNOG00000019044(Adam30),ENSRNOG00000001719(Psmd2),ENSRNOG00000017181(Malt1),ENSRNOG00000019212(Tpp1),ENSRNOG00000015150(Spg7),ENSRNOG00000034134(Cpm),	0.814443	1	1
GO:0048545	response to steroid hormone	biological_process	7	301	569	19765	ENSRNOG00000009826(Bche),ENSRNOG00000030118(Msn),ENSRNOG00000012436(Adh6),ENSRNOG00000015734(Ube3a),ENSRNOG00000002593(Esrrg),ENSRNOG00000039859(Dnmt1),ENSRNOG00000005616(Ncoa3),	0.807823	1	1
GO:0003677	DNA binding	molecular_function	21	301	1707	19765	ENSRNOG00000060320(Lin28a),ENSRNOG00000024178(Cenpt),ENSRNOG00000026110(Scml4),ENSRNOG00000000308(Zbtb24),ENSRNOG00000039859(Dnmt1),ENSRNOG00000014935(Peo1),ENSRNOG00000007887(Elk4),ENSRNOG00000007408(Ebf4),ENSRNOG00000009184(Foxp1),ENSRNOG00000028856(Pknox2),ENSRNOG00000001134(Rfc5),ENSRNOG00000025408(Duxbl1),ENSRNOG00000002593(Esrrg),ENSRNOG00000009139(Fubp3),ENSRNOG00000032224(Hist1h4b),ENSRNO…	0.807823	1	1
GO:0016310	phosphorylation	biological_process	23	301	1870	19765	ENSRNOG00000008065(Wwc1),ENSRNOG00000001426(Prkrip1),ENSRNOG00000017181(Malt1),ENSRNOG00000038720(Cdkl1),ENSRNOG00000038184(Camk2n2),ENSRNOG00000014628(Pomk),ENSRNOG00000009783(Camk2g),ENSRNOG00000016448(Eef2k),ENSRNOG00000027787(Cdc6),ENSRNOG00000001453(Baz1b),ENSRNOG00000001050(Eif2ak1),ENSRNOG00000028913(LOC688970),ENSRNOG00000014049(Riok1),ENSRNOG00000012818(Ksr1),ENSRNOG00000002215(Mylk),ENS…	0.807638	1	1
GO:0016021	integral component of membrane	cellular_component	78	301	6379	19765	ENSRNOG00000026702(Amica1),ENSRNOG00000019318(Syt3),ENSRNOG00000049019(Tmem170a),ENSRNOG00000001427(Orai2),ENSRNOG00000016632(Dsg3),ENSRNOG00000006658(RGD1563015),ENSRNOG00000036760(Tmc5),ENSRNOG00000006082(Rmdn2),ENSRNOG00000014218(Tmem25),ENSRNOG00000004555(Sec14l4),ENSRNOG00000050828(Vkorc1),ENSRNOG00000004276(Itga3),ENSRNOG00000057221(Scn3b),ENSRNOG00000015746(Kcng4),ENSRNOG00000006523(Atl2),…	0.80292	1	1
GO:0048468	cell development	biological_process	22	301	1805	19765	ENSRNOG00000016448(Eef2k),ENSRNOG00000005957(Slc4a7),ENSRNOG00000006965(Aff4),ENSRNOG00000049115(Ccr5),ENSRNOG00000019692(Metrn),ENSRNOG00000060320(Lin28a),ENSRNOG00000019318(Syt3),ENSRNOG00000020482(Nfatc4),ENSRNOG00000000841(Ddx39b),ENSRNOG00000015602(Cdh2),ENSRNOG00000003261(Usp9x),ENSRNOG00000030118(Msn),ENSRNOG00000010649(Ctnnd2),ENSRNOG00000000934(Piwil1),ENSRNOG00000013674(Megf10),ENSRNOG0…	0.800342	1	1
GO:0051960	regulation of nervous system development	biological_process	9	301	742	19765	ENSRNOG00000020482(Nfatc4),ENSRNOG00000015602(Cdh2),ENSRNOG00000016448(Eef2k),ENSRNOG00000019692(Metrn),ENSRNOG00000049115(Ccr5),ENSRNOG00000004276(Itga3),ENSRNOG00000019318(Syt3),ENSRNOG00000060320(Lin28a),ENSRNOG00000026466(Lrrtm3),	0.796469	1	1
GO:0043565	sequence-specific DNA binding	molecular_function	11	301	907	19765	ENSRNOG00000009184(Foxp1),ENSRNOG00000028856(Pknox2),ENSRNOG00000039859(Dnmt1),ENSRNOG00000002593(Esrrg),ENSRNOG00000009139(Fubp3),ENSRNOG00000007887(Elk4),ENSRNOG00000054989(Grhl1),ENSRNOG00000007408(Ebf4),ENSRNOG00000004730(Meis2),ENSRNOG00000020482(Nfatc4),ENSRNOG00000019653(Csrnp2),	0.796372	1	1
GO:0001816	cytokine production	biological_process	6	301	495	19765	ENSRNOG00000000394(Srgn),ENSRNOG00000017181(Malt1),ENSRNOG00000020482(Nfatc4),ENSRNOG00000049115(Ccr5),ENSRNOG00000009184(Foxp1),ENSRNOG00000011321(Rftn1),	0.795933	1	1
GO:0031224	intrinsic component of membrane	cellular_component	78	301	6440	19765	ENSRNOG00000016953(Chst4),ENSRNOG00000006523(Atl2),ENSRNOG00000045524(Slc39a3),ENSRNOG00000019044(Adam30),ENSRNOG00000038999(RT1-A1),ENSRNOG00000012037(Galnt7),ENSRNOG00000050828(Vkorc1),ENSRNOG00000004555(Sec14l4),ENSRNOG00000014218(Tmem25),ENSRNOG00000015746(Kcng4),ENSRNOG00000057221(Scn3b),ENSRNOG00000004276(Itga3),ENSRNOG00000036760(Tmc5),ENSRNOG00000006082(Rmdn2),ENSRNOG00000049019(Tmem170a)…	0.795315	1	1
GO:0009605	response to external stimulus	biological_process	23	301	1900	19765	ENSRNOG00000018901(Rab14),ENSRNOG00000009826(Bche),ENSRNOG00000001187(Oasl),ENSRNOG00000004730(Meis2),ENSRNOG00000031162(Ccl24),ENSRNOG00000031544(Larp1),ENSRNOG00000001189(Sik1),ENSRNOG00000032034(Supt5h),ENSRNOG00000013166(Wnt4),ENSRNOG00000019978(Parg),ENSRNOG00000050828(Vkorc1),ENSRNOG00000009184(Foxp1),ENSRNOG00000002265(Casr),ENSRNOG00000008022(Apaf1),ENSRNOG00000002215(Mylk),ENSRNOG0000000…	0.794885	1	1
GO:0050767	regulation of neurogenesis	biological_process	8	301	661	19765	ENSRNOG00000049115(Ccr5),ENSRNOG00000019692(Metrn),ENSRNOG00000004276(Itga3),ENSRNOG00000060320(Lin28a),ENSRNOG00000019318(Syt3),ENSRNOG00000016448(Eef2k),ENSRNOG00000015602(Cdh2),ENSRNOG00000020482(Nfatc4),	0.794729	1	1
GO:0008284	positive regulation of cell proliferation	biological_process	9	301	744	19765	ENSRNOG00000060320(Lin28a),ENSRNOG00000026702(Amica1),ENSRNOG00000009184(Foxp1),ENSRNOG00000002265(Casr),ENSRNOG00000036866(Acer3),ENSRNOG00000027787(Cdc6),ENSRNOG00000000841(Ddx39b),ENSRNOG00000031162(Ccl24),ENSRNOG00000011859(Eif5a2),	0.794328	1	1
GO:0006412	translation	biological_process	10	301	827	19765	ENSRNOG00000031544(Larp1),ENSRNOG00000001050(Eif2ak1),ENSRNOG00000029115(RGD1564883),ENSRNOG00000001161(Gatc),ENSRNOG00000011859(Eif5a2),ENSRNOG00000019165(Mrpl51),ENSRNOG00000000841(Ddx39b),ENSRNOG00000001073(RGD1563482),ENSRNOG00000060320(Lin28a),ENSRNOG00000020658(Aarsd1),	0.794008	1	1
GO:0009617	response to bacterium	biological_process	6	301	498	19765	ENSRNOG00000019978(Parg),ENSRNOG00000017181(Malt1),ENSRNOG00000009348(Nos3),ENSRNOG00000018901(Rab14),ENSRNOG00000039859(Dnmt1),ENSRNOG00000049115(Ccr5),	0.791138	1	1
GO:0007049	cell cycle	biological_process	14	301	1167	19765	ENSRNOG00000013166(Wnt4),ENSRNOG00000000841(Ddx39b),ENSRNOG00000001189(Sik1),ENSRNOG00000031916(Timeless),ENSRNOG00000001426(Prkrip1),ENSRNOG00000024178(Cenpt),ENSRNOG00000032929(Incenp),ENSRNOG00000038720(Cdkl1),ENSRNOG00000038184(Camk2n2),ENSRNOG00000009783(Camk2g),ENSRNOG00000025222(Pcid2),ENSRNOG00000000417(Numa1),ENSRNOG00000027787(Cdc6),ENSRNOG00000024266(Haus5),	0.787748	1	1
GO:0006396	RNA processing	biological_process	7	301	587	19765	ENSRNOG00000032034(Supt5h),ENSRNOG00000007629(Sf3a3),ENSRNOG00000000841(Ddx39b),ENSRNOG00000002827(Rbfox1),ENSRNOG00000039829(Rpp14),ENSRNOG00000060320(Lin28a),ENSRNOG00000052968(Hnrnpa3),	0.783051	1	1
GO:0006935	chemotaxis	biological_process	5	301	421	19765	ENSRNOG00000002265(Casr),ENSRNOG00000009184(Foxp1),ENSRNOG00000026702(Amica1),ENSRNOG00000031162(Ccl24),ENSRNOG00000049115(Ccr5),	0.779863	1	1
GO:0052548	regulation of endopeptidase activity	biological_process	4	301	337	19765	ENSRNOG00000025222(Pcid2),ENSRNOG00000002255(Fam162a),ENSRNOG00000020377(Cideb),ENSRNOG00000008022(Apaf1),	0.7794	1	1
GO:0043043	peptide biosynthetic process	biological_process	10	301	843	19765	ENSRNOG00000020658(Aarsd1),ENSRNOG00000060320(Lin28a),ENSRNOG00000001073(RGD1563482),ENSRNOG00000019165(Mrpl51),ENSRNOG00000000841(Ddx39b),ENSRNOG00000001161(Gatc),ENSRNOG00000011859(Eif5a2),ENSRNOG00000029115(RGD1564883),ENSRNOG00000001050(Eif2ak1),ENSRNOG00000031544(Larp1),	0.778938	1	1
GO:0001501	skeletal system development	biological_process	5	301	424	19765	ENSRNOG00000019830(Hsd17b1),ENSRNOG00000050828(Vkorc1),ENSRNOG00000003174(Tapt1),ENSRNOG00000029459(Mir199a2),ENSRNOG00000045524(Slc39a3),	0.774345	1	1
GO:0002237	response to molecule of bacterial origin	biological_process	4	301	342	19765	ENSRNOG00000039859(Dnmt1),ENSRNOG00000049115(Ccr5),ENSRNOG00000017181(Malt1),ENSRNOG00000009348(Nos3),	0.768005	1	1
GO:0048608	reproductive structure development	biological_process	5	301	428	19765	ENSRNOG00000015734(Ube3a),ENSRNOG00000013166(Wnt4),ENSRNOG00000009348(Nos3),ENSRNOG00000012358(Pcyt1b),ENSRNOG00000005616(Ncoa3),	0.767108	1	1
GO:0061458	reproductive system development	biological_process	5	301	432	19765	ENSRNOG00000012358(Pcyt1b),ENSRNOG00000009348(Nos3),ENSRNOG00000013166(Wnt4),ENSRNOG00000015734(Ube3a),ENSRNOG00000005616(Ncoa3),	0.760005	1	1
GO:0001503	ossification	biological_process	4	301	346	19765	ENSRNOG00000000394(Srgn),ENSRNOG00000013166(Wnt4),ENSRNOG00000002265(Casr),ENSRNOG00000032224(Hist1h4b),	0.759127	1	1
GO:0031324	negative regulation of cellular metabolic process	biological_process	23	301	1993	19765	ENSRNOG00000021200(Hfe2),ENSRNOG00000020482(Nfatc4),ENSRNOG00000019653(Csrnp2),ENSRNOG00000031916(Timeless),ENSRNOG00000001189(Sik1),ENSRNOG00000032034(Supt5h),ENSRNOG00000052061(Ppef2),ENSRNOG00000016133(Sumo1),ENSRNOG00000013166(Wnt4),ENSRNOG00000009184(Foxp1),ENSRNOG00000024194(Rsf1),ENSRNOG00000007887(Elk4),ENSRNOG00000022893(Rimbp2),ENSRNOG00000004158(Hdac9),ENSRNOG00000025222(Pcid2),ENSRNOG…	0.757793	1	1
GO:0009887	organ morphogenesis	biological_process	10	301	868	19765	ENSRNOG00000015602(Cdh2),ENSRNOG00000005957(Slc4a7),ENSRNOG00000030118(Msn),ENSRNOG00000045524(Slc39a3),ENSRNOG00000001453(Baz1b),ENSRNOG00000016983(Myh7),ENSRNOG00000013166(Wnt4),ENSRNOG00000005616(Ncoa3),ENSRNOG00000002215(Mylk),ENSRNOG00000025757(Myh6),	0.756503	1	1
GO:0044212	transcription regulatory region DNA binding	molecular_function	8	301	696	19765	ENSRNOG00000009139(Fubp3),ENSRNOG00000054989(Grhl1),ENSRNOG00000007408(Ebf4),ENSRNOG00000020482(Nfatc4),ENSRNOG00000004730(Meis2),ENSRNOG00000009184(Foxp1),ENSRNOG00000028856(Pknox2),ENSRNOG00000002593(Esrrg),	0.754764	1	1
GO:0023052	signaling	biological_process	69	301	6020	19765	ENSRNOG00000021200(Hfe2),ENSRNOG00000031162(Ccl24),ENSRNOG00000015602(Cdh2),ENSRNOG00000020482(Nfatc4),ENSRNOG00000006639(Scn9a),ENSRNOG00000031544(Larp1),ENSRNOG00000001189(Sik1),ENSRNOG00000010649(Ctnnd2),ENSRNOG00000019220(Rhod),ENSRNOG00000002593(Esrrg),ENSRNOG00000027592(Rerg),ENSRNOG00000025423(Map3k13),ENSRNOG00000054385(Rhebl1),ENSRNOG00000009783(Camk2g),ENSRNOG00000025111(Nfkbid),ENSRNOG…	0.752632	1	1
GO:0009892	negative regulation of metabolic process	biological_process	25	301	2183	19765	ENSRNOG00000001050(Eif2ak1),ENSRNOG00000004158(Hdac9),ENSRNOG00000007887(Elk4),ENSRNOG00000025222(Pcid2),ENSRNOG00000038184(Camk2n2),ENSRNOG00000027317(Ylpm1),ENSRNOG00000001426(Prkrip1),ENSRNOG00000039859(Dnmt1),ENSRNOG00000008065(Wwc1),ENSRNOG00000031916(Timeless),ENSRNOG00000052061(Ppef2),ENSRNOG00000016133(Sumo1),ENSRNOG00000019653(Csrnp2),ENSRNOG00000013166(Wnt4),ENSRNOG00000011975(Crtc3),EN…	0.751998	1	1
GO:0033993	response to lipid	biological_process	11	301	961	19765	ENSRNOG00000009348(Nos3),ENSRNOG00000012436(Adh6),ENSRNOG00000002593(Esrrg),ENSRNOG00000015734(Ube3a),ENSRNOG00000049115(Ccr5),ENSRNOG00000039859(Dnmt1),ENSRNOG00000002265(Casr),ENSRNOG00000021614(Kmt2e),ENSRNOG00000005616(Ncoa3),ENSRNOG00000009826(Bche),ENSRNOG00000030118(Msn),	0.751622	1	1
GO:0000975	regulatory region DNA binding	molecular_function	8	301	699	19765	ENSRNOG00000002593(Esrrg),ENSRNOG00000009184(Foxp1),ENSRNOG00000028856(Pknox2),ENSRNOG00000054989(Grhl1),ENSRNOG00000020482(Nfatc4),ENSRNOG00000004730(Meis2),ENSRNOG00000007408(Ebf4),ENSRNOG00000009139(Fubp3),	0.751524	1	1
GO:0007154	cell communication	biological_process	70	301	6122	19765	ENSRNOG00000057221(Scn3b),ENSRNOG00000004276(Itga3),ENSRNOG00000012965(Themis2),ENSRNOG00000000394(Srgn),ENSRNOG00000008865(Stac),ENSRNOG00000052061(Ppef2),ENSRNOG00000025406(Iqgap2),ENSRNOG00000019318(Syt3),ENSRNOG00000008065(Wwc1),ENSRNOG00000020377(Cideb),ENSRNOG00000018144(Depdc5),ENSRNOG00000001453(Baz1b),ENSRNOG00000047080(Gng4),ENSRNOG00000058940(Rab11fip1),ENSRNOG00000025757(Myh6),ENSRNOG…	0.750819	1	1
GO:0097305	response to alcohol	biological_process	5	301	438	19765	ENSRNOG00000005616(Ncoa3),ENSRNOG00000002265(Casr),ENSRNOG00000039859(Dnmt1),ENSRNOG00000030118(Msn),ENSRNOG00000012436(Adh6),	0.749594	1	1
GO:0000165	MAPK cascade	biological_process	7	301	616	19765	ENSRNOG00000008065(Wwc1),ENSRNOG00000002265(Casr),ENSRNOG00000025423(Map3k13),ENSRNOG00000012818(Ksr1),ENSRNOG00000015602(Cdh2),ENSRNOG00000031162(Ccl24),ENSRNOG00000052061(Ppef2),	0.746187	1	1
GO:0032446	protein modification by small protein conjugation	biological_process	7	301	617	19765	ENSRNOG00000016133(Sumo1),ENSRNOG00000011663(Rnf7),ENSRNOG00000025222(Pcid2),ENSRNOG00000010124(Trim2),ENSRNOG00000017157(Trim69),ENSRNOG00000017181(Malt1),ENSRNOG00000015734(Ube3a),	0.744978	1	1
GO:0006913	nucleocytoplasmic transport	biological_process	4	301	357	19765	ENSRNOG00000017383(l7Rn6),ENSRNOG00000017181(Malt1),ENSRNOG00000051711(Kpna1),ENSRNOG00000000841(Ddx39b),	0.735736	1	1
GO:1902531	regulation of intracellular signal transduction	biological_process	14	301	1250	19765	ENSRNOG00000012818(Ksr1),ENSRNOG00000025423(Map3k13),ENSRNOG00000004276(Itga3),ENSRNOG00000052061(Ppef2),ENSRNOG00000031162(Ccl24),ENSRNOG00000015602(Cdh2),ENSRNOG00000014265(Tnfrsf19),ENSRNOG00000015734(Ube3a),ENSRNOG00000008065(Wwc1),ENSRNOG00000017181(Malt1),ENSRNOG00000014083(Iqsec3),ENSRNOG00000018144(Depdc5),ENSRNOG00000025111(Nfkbid),ENSRNOG00000011975(Crtc3),	0.735442	1	1
GO:0009966	regulation of signal transduction	biological_process	23	301	2073	19765	ENSRNOG00000010649(Ctnnd2),ENSRNOG00000020482(Nfatc4),ENSRNOG00000031162(Ccl24),ENSRNOG00000015602(Cdh2),ENSRNOG00000021200(Hfe2),ENSRNOG00000025423(Map3k13),ENSRNOG00000011975(Crtc3),ENSRNOG00000025111(Nfkbid),ENSRNOG00000011820(Acpp),ENSRNOG00000015734(Ube3a),ENSRNOG00000002255(Fam162a),ENSRNOG00000052061(Ppef2),ENSRNOG00000012818(Ksr1),ENSRNOG00000008022(Apaf1),ENSRNOG00000004276(Itga3),ENSRNO…	0.728549	1	1
GO:0044702	single organism reproductive process	biological_process	12	301	1082	19765	ENSRNOG00000000934(Piwil1),ENSRNOG00000014584(Odf2),ENSRNOG00000005616(Ncoa3),ENSRNOG00000013166(Wnt4),ENSRNOG00000004276(Itga3),ENSRNOG00000006965(Aff4),ENSRNOG00000000417(Numa1),ENSRNOG00000009571(Wipf3),ENSRNOG00000060320(Lin28a),ENSRNOG00000012358(Pcyt1b),ENSRNOG00000009348(Nos3),ENSRNOG00000015734(Ube3a),	0.728256	1	1
GO:0051169	nuclear transport	biological_process	4	301	361	19765	ENSRNOG00000051711(Kpna1),ENSRNOG00000000841(Ddx39b),ENSRNOG00000017383(l7Rn6),ENSRNOG00000017181(Malt1),	0.727584	1	1
GO:0001932	regulation of protein phosphorylation	biological_process	12	301	1092	19765	ENSRNOG00000001426(Prkrip1),ENSRNOG00000017181(Malt1),ENSRNOG00000008065(Wwc1),ENSRNOG00000016448(Eef2k),ENSRNOG00000038184(Camk2n2),ENSRNOG00000001050(Eif2ak1),ENSRNOG00000027787(Cdc6),ENSRNOG00000025423(Map3k13),ENSRNOG00000012818(Ksr1),ENSRNOG00000031162(Ccl24),ENSRNOG00000015602(Cdh2),ENSRNOG00000052061(Ppef2),	0.721587	1	1
GO:0030529	intracellular ribonucleoprotein complex	cellular_component	11	301	1001	19765	ENSRNOG00000019165(Mrpl51),ENSRNOG00000000841(Ddx39b),ENSRNOG00000007629(Sf3a3),ENSRNOG00000029115(RGD1564883),ENSRNOG00000000934(Piwil1),ENSRNOG00000010855(Mrp63),ENSRNOG00000052968(Hnrnpa3),ENSRNOG00000060320(Lin28a),ENSRNOG00000058561(Srrm2),ENSRNOG00000019817(Ddx28),ENSRNOG00000001073(RGD1563482),	0.721587	1	1
GO:0007017	microtubule-based process	biological_process	6	301	547	19765	ENSRNOG00000015150(Spg7),ENSRNOG00000019629(Lamp1),ENSRNOG00000053230(Fopnl),ENSRNOG00000007504(Actr10),ENSRNOG00000000417(Numa1),ENSRNOG00000024266(Haus5),	0.720268	1	1
GO:0052547	regulation of peptidase activity	biological_process	4	301	366	19765	ENSRNOG00000020377(Cideb),ENSRNOG00000002255(Fam162a),ENSRNOG00000025222(Pcid2),ENSRNOG00000008022(Apaf1),	0.717644	1	1
GO:1902533	positive regulation of intracellular signal transduction	biological_process	8	301	732	19765	ENSRNOG00000025423(Map3k13),ENSRNOG00000014265(Tnfrsf19),ENSRNOG00000012818(Ksr1),ENSRNOG00000017181(Malt1),ENSRNOG00000015734(Ube3a),ENSRNOG00000008065(Wwc1),ENSRNOG00000031162(Ccl24),ENSRNOG00000015602(Cdh2),	0.717644	1	1
GO:0071944	cell periphery	cellular_component	52	301	4763	19765	ENSRNOG00000004276(Itga3),ENSRNOG00000015746(Kcng4),ENSRNOG00000057221(Scn3b),ENSRNOG00000038999(RT1-A1),ENSRNOG00000045524(Slc39a3),ENSRNOG00000016632(Dsg3),ENSRNOG00000008065(Wwc1),ENSRNOG00000019318(Syt3),ENSRNOG00000047080(Gng4),ENSRNOG00000001285(Atp2a2),ENSRNOG00000004345(Daam1),ENSRNOG00000018901(Rab14),ENSRNOG00000018009(Rab8b),ENSRNOG00000030118(Msn),ENSRNOG00000011321(Rftn1),ENSRNOG0000…	0.716891	1	1
GO:0023014	signal transduction by protein phosphorylation	biological_process	7	301	642	19765	ENSRNOG00000012818(Ksr1),ENSRNOG00000002265(Casr),ENSRNOG00000025423(Map3k13),ENSRNOG00000008065(Wwc1),ENSRNOG00000052061(Ppef2),ENSRNOG00000031162(Ccl24),ENSRNOG00000015602(Cdh2),	0.715968	1	1
GO:0051726	regulation of cell cycle	biological_process	8	301	740	19765	ENSRNOG00000001426(Prkrip1),ENSRNOG00000013166(Wnt4),ENSRNOG00000038720(Cdkl1),ENSRNOG00000000841(Ddx39b),ENSRNOG00000038184(Camk2n2),ENSRNOG00000025222(Pcid2),ENSRNOG00000027787(Cdc6),ENSRNOG00000001189(Sik1),	0.709886	1	1
GO:0048732	gland development	biological_process	5	301	463	19765	ENSRNOG00000005616(Ncoa3),ENSRNOG00000015734(Ube3a),ENSRNOG00000000841(Ddx39b),ENSRNOG00000030118(Msn),ENSRNOG00000013166(Wnt4),	0.709119	1	1
GO:0043408	regulation of MAPK cascade	biological_process	6	301	557	19765	ENSRNOG00000012818(Ksr1),ENSRNOG00000025423(Map3k13),ENSRNOG00000008065(Wwc1),ENSRNOG00000052061(Ppef2),ENSRNOG00000015602(Cdh2),ENSRNOG00000031162(Ccl24),	0.707337	1	1
GO:0007165	signal transduction	biological_process	61	301	5670	19765	ENSRNOG00000002549(Htr5b),ENSRNOG00000011820(Acpp),ENSRNOG00000019629(Lamp1),ENSRNOG00000015734(Ube3a),ENSRNOG00000002255(Fam162a),ENSRNOG00000028946(Cdc42ep4),ENSRNOG00000025111(Nfkbid),ENSRNOG00000002593(Esrrg),ENSRNOG00000019220(Rhod),ENSRNOG00000027592(Rerg),ENSRNOG00000054385(Rhebl1),ENSRNOG00000025423(Map3k13),ENSRNOG00000020482(Nfatc4),ENSRNOG00000015602(Cdh2),ENSRNOG00000031162(Ccl24),ENS…	0.706443	1	1
GO:0005886	plasma membrane	cellular_component	50	301	4654	19765	ENSRNOG00000057221(Scn3b),ENSRNOG00000015746(Kcng4),ENSRNOG00000004276(Itga3),ENSRNOG00000045524(Slc39a3),ENSRNOG00000038999(RT1-A1),ENSRNOG00000019318(Syt3),ENSRNOG00000016632(Dsg3),ENSRNOG00000008065(Wwc1),ENSRNOG00000047080(Gng4),ENSRNOG00000004345(Daam1),ENSRNOG00000001285(Atp2a2),ENSRNOG00000011321(Rftn1),ENSRNOG00000018901(Rab14),ENSRNOG00000018009(Rab8b),ENSRNOG00000030118(Msn),ENSRNOG0000…	0.705463	1	1
GO:0042981	regulation of apoptotic process	biological_process	13	301	1213	19765	ENSRNOG00000004019(Phlda1),ENSRNOG00000020482(Nfatc4),ENSRNOG00000033101(Myo18a),ENSRNOG00000008022(Apaf1),ENSRNOG00000013166(Wnt4),ENSRNOG00000025111(Nfkbid),ENSRNOG00000025222(Pcid2),ENSRNOG00000016448(Eef2k),ENSRNOG00000002866(Rassf6),ENSRNOG00000049115(Ccr5),ENSRNOG00000017181(Malt1),ENSRNOG00000020377(Cideb),ENSRNOG00000002255(Fam162a),	0.703741	1	1
GO:0051346	negative regulation of hydrolase activity	biological_process	4	301	374	19765	ENSRNOG00000019653(Csrnp2),ENSRNOG00000022893(Rimbp2),ENSRNOG00000025222(Pcid2),ENSRNOG00000009348(Nos3),	0.702294	1	1
GO:0009968	negative regulation of signal transduction	biological_process	9	301	843	19765	ENSRNOG00000004276(Itga3),ENSRNOG00000008065(Wwc1),ENSRNOG00000013166(Wnt4),ENSRNOG00000052061(Ppef2),ENSRNOG00000018144(Depdc5),ENSRNOG00000011975(Crtc3),ENSRNOG00000025111(Nfkbid),ENSRNOG00000015602(Cdh2),ENSRNOG00000021200(Hfe2),	0.701044	1	1
GO:0043067	regulation of programmed cell death	biological_process	13	301	1229	19765	ENSRNOG00000002866(Rassf6),ENSRNOG00000002255(Fam162a),ENSRNOG00000020377(Cideb),ENSRNOG00000017181(Malt1),ENSRNOG00000049115(Ccr5),ENSRNOG00000025111(Nfkbid),ENSRNOG00000025222(Pcid2),ENSRNOG00000016448(Eef2k),ENSRNOG00000008022(Apaf1),ENSRNOG00000013166(Wnt4),ENSRNOG00000004019(Phlda1),ENSRNOG00000020482(Nfatc4),ENSRNOG00000033101(Myo18a),	0.694579	1	1
GO:0051707	response to other organism	biological_process	8	301	763	19765	ENSRNOG00000018901(Rab14),ENSRNOG00000001187(Oasl),ENSRNOG00000002215(Mylk),ENSRNOG00000009348(Nos3),ENSRNOG00000017181(Malt1),ENSRNOG00000019978(Parg),ENSRNOG00000049115(Ccr5),ENSRNOG00000039859(Dnmt1),	0.688487	1	1
GO:0043207	response to external biotic stimulus	biological_process	8	301	766	19765	ENSRNOG00000002215(Mylk),ENSRNOG00000049115(Ccr5),ENSRNOG00000039859(Dnmt1),ENSRNOG00000019978(Parg),ENSRNOG00000009348(Nos3),ENSRNOG00000017181(Malt1),ENSRNOG00000018901(Rab14),ENSRNOG00000001187(Oasl),	0.685791	1	1
GO:0032269	negative regulation of cellular protein metabolic process	biological_process	9	301	863	19765	ENSRNOG00000001426(Prkrip1),ENSRNOG00000039859(Dnmt1),ENSRNOG00000060320(Lin28a),ENSRNOG00000022893(Rimbp2),ENSRNOG00000025222(Pcid2),ENSRNOG00000038184(Camk2n2),ENSRNOG00000019653(Csrnp2),ENSRNOG00000001050(Eif2ak1),ENSRNOG00000052061(Ppef2),	0.684797	1	1
GO:0016567	protein ubiquitination	biological_process	6	301	579	19765	ENSRNOG00000010124(Trim2),ENSRNOG00000017157(Trim69),ENSRNOG00000017181(Malt1),ENSRNOG00000015734(Ube3a),ENSRNOG00000011663(Rnf7),ENSRNOG00000025222(Pcid2),	0.680461	1	1
GO:0032386	regulation of intracellular transport	biological_process	5	301	491	19765	ENSRNOG00000021555(Mis18a),ENSRNOG00000019629(Lamp1),ENSRNOG00000003971(Gosr1),ENSRNOG00000001285(Atp2a2),ENSRNOG00000030118(Msn),	0.668681	1	1
GO:0042325	regulation of phosphorylation	biological_process	12	301	1185	19765	ENSRNOG00000038184(Camk2n2),ENSRNOG00000016448(Eef2k),ENSRNOG00000027787(Cdc6),ENSRNOG00000001050(Eif2ak1),ENSRNOG00000008065(Wwc1),ENSRNOG00000017181(Malt1),ENSRNOG00000001426(Prkrip1),ENSRNOG00000031162(Ccl24),ENSRNOG00000015602(Cdh2),ENSRNOG00000052061(Ppef2),ENSRNOG00000012818(Ksr1),ENSRNOG00000025423(Map3k13),	0.664956	1	1
GO:0098542	defense response to other organism	biological_process	4	301	400	19765	ENSRNOG00000002215(Mylk),ENSRNOG00000049115(Ccr5),ENSRNOG00000001187(Oasl),ENSRNOG00000018901(Rab14),	0.656645	1	1
GO:0022414	reproductive process	biological_process	12	301	1202	19765	ENSRNOG00000000417(Numa1),ENSRNOG00000006965(Aff4),ENSRNOG00000009571(Wipf3),ENSRNOG00000060320(Lin28a),ENSRNOG00000015734(Ube3a),ENSRNOG00000009348(Nos3),ENSRNOG00000012358(Pcyt1b),ENSRNOG00000000934(Piwil1),ENSRNOG00000005616(Ncoa3),ENSRNOG00000014584(Odf2),ENSRNOG00000004276(Itga3),ENSRNOG00000013166(Wnt4),	0.655552	1	1
GO:0051174	regulation of phosphorus metabolic process	biological_process	14	301	1405	19765	ENSRNOG00000052061(Ppef2),ENSRNOG00000019653(Csrnp2),ENSRNOG00000015602(Cdh2),ENSRNOG00000031162(Ccl24),ENSRNOG00000025423(Map3k13),ENSRNOG00000012818(Ksr1),ENSRNOG00000001050(Eif2ak1),ENSRNOG00000027787(Cdc6),ENSRNOG00000016448(Eef2k),ENSRNOG00000022893(Rimbp2),ENSRNOG00000038184(Camk2n2),ENSRNOG00000017181(Malt1),ENSRNOG00000001426(Prkrip1),ENSRNOG00000008065(Wwc1),	0.654308	1	1
GO:0000003	reproduction	biological_process	12	301	1205	19765	ENSRNOG00000006965(Aff4),ENSRNOG00000000417(Numa1),ENSRNOG00000009571(Wipf3),ENSRNOG00000060320(Lin28a),ENSRNOG00000009348(Nos3),ENSRNOG00000012358(Pcyt1b),ENSRNOG00000015734(Ube3a),ENSRNOG00000000934(Piwil1),ENSRNOG00000014584(Odf2),ENSRNOG00000005616(Ncoa3),ENSRNOG00000013166(Wnt4),ENSRNOG00000004276(Itga3),	0.65392	1	1
GO:1903047	mitotic cell cycle process	biological_process	5	301	503	19765	ENSRNOG00000024178(Cenpt),ENSRNOG00000000417(Numa1),ENSRNOG00000027787(Cdc6),ENSRNOG00000009783(Camk2g),ENSRNOG00000025222(Pcid2),	0.652728	1	1
GO:0009607	response to biotic stimulus	biological_process	8	301	805	19765	ENSRNOG00000039859(Dnmt1),ENSRNOG00000049115(Ccr5),ENSRNOG00000019978(Parg),ENSRNOG00000017181(Malt1),ENSRNOG00000009348(Nos3),ENSRNOG00000002215(Mylk),ENSRNOG00000001187(Oasl),ENSRNOG00000018901(Rab14),	0.652566	1	1
GO:0010941	regulation of cell death	biological_process	13	301	1317	19765	ENSRNOG00000004019(Phlda1),ENSRNOG00000020482(Nfatc4),ENSRNOG00000033101(Myo18a),ENSRNOG00000008022(Apaf1),ENSRNOG00000013166(Wnt4),ENSRNOG00000025111(Nfkbid),ENSRNOG00000025222(Pcid2),ENSRNOG00000016448(Eef2k),ENSRNOG00000002866(Rassf6),ENSRNOG00000049115(Ccr5),ENSRNOG00000020377(Cideb),ENSRNOG00000002255(Fam162a),ENSRNOG00000017181(Malt1),	0.648168	1	1
GO:0000278	mitotic cell cycle	biological_process	6	301	608	19765	ENSRNOG00000024178(Cenpt),ENSRNOG00000001189(Sik1),ENSRNOG00000027787(Cdc6),ENSRNOG00000000417(Numa1),ENSRNOG00000025222(Pcid2),ENSRNOG00000009783(Camk2g),	0.648004	1	1
GO:0031401	positive regulation of protein modification process	biological_process	9	301	918	19765	ENSRNOG00000039859(Dnmt1),ENSRNOG00000008065(Wwc1),ENSRNOG00000015734(Ube3a),ENSRNOG00000017181(Malt1),ENSRNOG00000012818(Ksr1),ENSRNOG00000025423(Map3k13),ENSRNOG00000031162(Ccl24),ENSRNOG00000015602(Cdh2),ENSRNOG00000027787(Cdc6),	0.643769	1	1
GO:0010564	regulation of cell cycle process	biological_process	4	301	409	19765	ENSRNOG00000025222(Pcid2),ENSRNOG00000013166(Wnt4),ENSRNOG00000000841(Ddx39b),ENSRNOG00000027787(Cdc6),	0.642195	1	1
GO:0007166	cell surface receptor signaling pathway	biological_process	18	301	1893	19765	ENSRNOG00000019208(P2rx5),ENSRNOG00000009348(Nos3),ENSRNOG00000017181(Malt1),ENSRNOG00000013171(Grm2),ENSRNOG00000011820(Acpp),ENSRNOG00000049115(Ccr5),ENSRNOG00000010649(Ctnnd2),ENSRNOG00000003298(Cd247),ENSRNOG00000011321(Rftn1),ENSRNOG00000003261(Usp9x),ENSRNOG00000021200(Hfe2),ENSRNOG00000018901(Rab14),ENSRNOG00000015602(Cdh2),ENSRNOG00000031162(Ccl24),ENSRNOG00000025757(Myh6),ENSRNOG00000013…	0.624385	1	1
GO:1903827	regulation of cellular protein localization	biological_process	4	301	421	19765	ENSRNOG00000015602(Cdh2),ENSRNOG00000004276(Itga3),ENSRNOG00000030118(Msn),ENSRNOG00000021555(Mis18a),	0.62389	1	1
GO:0001934	positive regulation of protein phosphorylation	biological_process	7	301	752	19765	ENSRNOG00000031162(Ccl24),ENSRNOG00000015602(Cdh2),ENSRNOG00000027787(Cdc6),ENSRNOG00000017181(Malt1),ENSRNOG00000008065(Wwc1),ENSRNOG00000025423(Map3k13),ENSRNOG00000012818(Ksr1),	0.611238	1	1
GO:1990234	transferase complex	cellular_component	6	301	646	19765	ENSRNOG00000025423(Map3k13),ENSRNOG00000021614(Kmt2e),ENSRNOG00000016825(Cd3eap),ENSRNOG00000011663(Rnf7),ENSRNOG00000004300(Gtf2a1),ENSRNOG00000003063(Phka1),	0.609887	1	1
GO:0008285	negative regulation of cell proliferation	biological_process	5	301	542	19765	ENSRNOG00000049115(Ccr5),ENSRNOG00000009348(Nos3),ENSRNOG00000027592(Rerg),ENSRNOG00000009826(Bche),ENSRNOG00000001050(Eif2ak1),	0.605761	1	1
GO:0043086	negative regulation of catalytic activity	biological_process	6	301	654	19765	ENSRNOG00000025222(Pcid2),ENSRNOG00000022893(Rimbp2),ENSRNOG00000019653(Csrnp2),ENSRNOG00000038184(Camk2n2),ENSRNOG00000009348(Nos3),ENSRNOG00000001426(Prkrip1),	0.602426	1	1
GO:0005615	extracellular space	cellular_component	10	301	1092	19765	ENSRNOG00000011820(Acpp),ENSRNOG00000019692(Metrn),ENSRNOG00000012324(Soga3),ENSRNOG00000000394(Srgn),ENSRNOG00000013166(Wnt4),ENSRNOG00000018574(Qsox2),ENSRNOG00000009826(Bche),ENSRNOG00000021200(Hfe2),ENSRNOG00000030118(Msn),ENSRNOG00000031162(Ccl24),	0.601323	1	1
GO:0001817	regulation of cytokine production	biological_process	4	301	439	19765	ENSRNOG00000049115(Ccr5),ENSRNOG00000020482(Nfatc4),ENSRNOG00000017181(Malt1),ENSRNOG00000000394(Srgn),	0.598309	1	1
GO:0045859	regulation of protein kinase activity	biological_process	5	301	557	19765	ENSRNOG00000027787(Cdc6),ENSRNOG00000038184(Camk2n2),ENSRNOG00000025423(Map3k13),ENSRNOG00000017181(Malt1),ENSRNOG00000001426(Prkrip1),	0.589448	1	1
GO:0048598	embryonic morphogenesis	biological_process	5	301	560	19765	ENSRNOG00000004276(Itga3),ENSRNOG00000013166(Wnt4),ENSRNOG00000008022(Apaf1),ENSRNOG00000005616(Ncoa3),ENSRNOG00000045524(Slc39a3),	0.58629	1	1
GO:0007167	enzyme linked receptor protein signaling pathway	biological_process	6	301	676	19765	ENSRNOG00000018901(Rab14),ENSRNOG00000003261(Usp9x),ENSRNOG00000021200(Hfe2),ENSRNOG00000025757(Myh6),ENSRNOG00000004276(Itga3),ENSRNOG00000013166(Wnt4),	0.582821	1	1
GO:0042327	positive regulation of phosphorylation	biological_process	7	301	789	19765	ENSRNOG00000025423(Map3k13),ENSRNOG00000012818(Ksr1),ENSRNOG00000017181(Malt1),ENSRNOG00000008065(Wwc1),ENSRNOG00000027787(Cdc6),ENSRNOG00000031162(Ccl24),ENSRNOG00000015602(Cdh2),	0.582574	1	1
GO:0032787	monocarboxylic acid metabolic process	biological_process	4	301	466	19765	ENSRNOG00000012436(Adh6),ENSRNOG00000007102(Acss1),ENSRNOG00000006462(Ero1l),ENSRNOG00000019630(Hacl1),	0.563643	1	1
GO:0043549	regulation of kinase activity	biological_process	5	301	605	19765	ENSRNOG00000001426(Prkrip1),ENSRNOG00000017181(Malt1),ENSRNOG00000025423(Map3k13),ENSRNOG00000038184(Camk2n2),ENSRNOG00000027787(Cdc6),	0.542681	1	1
GO:0042493	response to drug	biological_process	4	301	509	19765	ENSRNOG00000005193(Pfas),ENSRNOG00000039859(Dnmt1),ENSRNOG00000004276(Itga3),ENSRNOG00000009826(Bche),	0.516027	1	1
GO:0018193	peptidyl-amino acid modification	biological_process	7	301	913	19765	ENSRNOG00000004158(Hdac9),ENSRNOG00000016133(Sumo1),ENSRNOG00000052061(Ppef2),ENSRNOG00000039859(Dnmt1),ENSRNOG00000005616(Ncoa3),ENSRNOG00000021614(Kmt2e),ENSRNOG00000050828(Vkorc1),	0.503451	1	1
GO:0005840	ribosome	cellular_component	4	301	566	19765	ENSRNOG00000010855(Mrp63),ENSRNOG00000029115(RGD1564883),ENSRNOG00000019165(Mrpl51),ENSRNOG00000001073(RGD1563482),	0.46406	1	1
GO:0043066	negative regulation of apoptotic process	biological_process	5	301	734	19765	ENSRNOG00000013166(Wnt4),ENSRNOG00000049115(Ccr5),ENSRNOG00000016448(Eef2k),ENSRNOG00000025222(Pcid2),ENSRNOG00000033101(Myo18a),	0.447306	1	1
GO:0043069	negative regulation of programmed cell death	biological_process	5	301	748	19765	ENSRNOG00000013166(Wnt4),ENSRNOG00000049115(Ccr5),ENSRNOG00000016448(Eef2k),ENSRNOG00000025222(Pcid2),ENSRNOG00000033101(Myo18a),	0.438934	1	1
GO:0050877	neurological system process	biological_process	14	301	2138	19765	ENSRNOG00000014628(Pomk),ENSRNOG00000013610(Chrna5),ENSRNOG00000011820(Acpp),ENSRNOG00000009826(Bche),ENSRNOG00000004730(Meis2),ENSRNOG00000006639(Scn9a),ENSRNOG00000010649(Ctnnd2),ENSRNOG00000002827(Rbfox1),ENSRNOG00000005957(Slc4a7),ENSRNOG00000052061(Ppef2),ENSRNOG00000057221(Scn3b),ENSRNOG00000019212(Tpp1),ENSRNOG00000004276(Itga3),ENSRNOG00000059765(Asic1),	0.429982	1	1
GO:0060548	negative regulation of cell death	biological_process	5	301	814	19765	ENSRNOG00000033101(Myo18a),ENSRNOG00000016448(Eef2k),ENSRNOG00000025222(Pcid2),ENSRNOG00000049115(Ccr5),ENSRNOG00000013166(Wnt4),	0.403344	1	1
GO:0005198	structural molecule activity	molecular_function	5	301	855	19765	ENSRNOG00000018700(Mobp),ENSRNOG00000029115(RGD1564883),ENSRNOG00000019165(Mrpl51),ENSRNOG00000012818(Ksr1),ENSRNOG00000008065(Wwc1),	0.384003	1	1
GO:0004871	signal transducer activity	molecular_function	15	301	2599	19765	ENSRNOG00000019208(P2rx5),ENSRNOG00000047080(Gng4),ENSRNOG00000017181(Malt1),ENSRNOG00000003298(Cd247),ENSRNOG00000002011(Gnrhr),ENSRNOG00000002265(Casr),ENSRNOG00000036745(Gna13),ENSRNOG00000008619(Agtrap),ENSRNOG00000013610(Chrna5),ENSRNOG00000013171(Grm2),ENSRNOG00000002549(Htr5b),ENSRNOG00000049115(Ccr5),ENSRNOG00000021200(Hfe2),ENSRNOG00000002593(Esrrg),ENSRNOG00000025423(Map3k13),	0.378979	1	1
GO:0004872	receptor activity	molecular_function	13	301	2559	19765	ENSRNOG00000019208(P2rx5),ENSRNOG00000003298(Cd247),ENSRNOG00000002265(Casr),ENSRNOG00000059765(Asic1),ENSRNOG00000002011(Gnrhr),ENSRNOG00000008619(Agtrap),ENSRNOG00000013171(Grm2),ENSRNOG00000013610(Chrna5),ENSRNOG00000049115(Ccr5),ENSRNOG00000002549(Htr5b),ENSRNOG00000048932(Smagp),ENSRNOG00000021200(Hfe2),ENSRNOG00000002593(Esrrg),	0.333583	1	1
GO:0007186	G-protein coupled receptor signaling pathway	biological_process	11	301	2281	19765	ENSRNOG00000031162(Ccl24),ENSRNOG00000036745(Gna13),ENSRNOG00000008619(Agtrap),ENSRNOG00000013171(Grm2),ENSRNOG00000002549(Htr5b),ENSRNOG00000049115(Ccr5),ENSRNOG00000011820(Acpp),ENSRNOG00000002011(Gnrhr),ENSRNOG00000002265(Casr),ENSRNOG00000047080(Gng4),ENSRNOG00000025406(Iqgap2),	0.316663	1	1
GO:0038023	signaling receptor activity	molecular_function	11	301	2380	19765	ENSRNOG00000021200(Hfe2),ENSRNOG00000002593(Esrrg),ENSRNOG00000008619(Agtrap),ENSRNOG00000002549(Htr5b),ENSRNOG00000049115(Ccr5),ENSRNOG00000013610(Chrna5),ENSRNOG00000013171(Grm2),ENSRNOG00000003298(Cd247),ENSRNOG00000002011(Gnrhr),ENSRNOG00000002265(Casr),ENSRNOG00000019208(P2rx5),	0.303491	1	1
GO:0004888	transmembrane signaling receptor activity	molecular_function	10	301	2301	19765	ENSRNOG00000003298(Cd247),ENSRNOG00000002011(Gnrhr),ENSRNOG00000002265(Casr),ENSRNOG00000019208(P2rx5),ENSRNOG00000021200(Hfe2),ENSRNOG00000008619(Agtrap),ENSRNOG00000049115(Ccr5),ENSRNOG00000002549(Htr5b),ENSRNOG00000013610(Chrna5),ENSRNOG00000013171(Grm2),	0.285374	1	1
GO:0007600	sensory perception	biological_process	6	301	1800	19765	ENSRNOG00000011820(Acpp),ENSRNOG00000005957(Slc4a7),ENSRNOG00000014628(Pomk),ENSRNOG00000059765(Asic1),ENSRNOG00000057221(Scn3b),ENSRNOG00000052061(Ppef2),	0.218882	1	1
GO:0004930	G-protein coupled receptor activity	molecular_function	6	301	1984	19765	ENSRNOG00000002265(Casr),ENSRNOG00000002011(Gnrhr),ENSRNOG00000013171(Grm2),ENSRNOG00000002549(Htr5b),ENSRNOG00000049115(Ccr5),ENSRNOG00000008619(Agtrap),	0.198582	1	1
