# Supplementary material for: LncRNAs down-regulate Myh1, Casr, and Mis18a expression in the Substantia Nigra of aged male rats
Source: Aging (Albany NY). 2019 Oct 2;11(19):8313–28. doi: 10.18632/aging.102321 (PMC6814601; doi:10.18632/aging.102321)
Supplement: Supplementary Table 13 [file aging-11-102321-s008.xlsx]

## Sheet: Table 13
pathway_3	pathway_3_num	all_diff_gene_list	pathway_2	pathway_2_num	pathway_1	pathway_1_num
Regulation of actin cytoskeleton	5	ENSRNOG00000030118(Msn),ENSRNOG00000004276(Itga3),ENSRNOG00000014409(Myl7),ENSRNOG00000036745(Gna13),ENSRNOG00000002215(Mylk),	Cell motility	5	Cellular Processes	27
Oocyte meiosis	1	ENSRNOG00000009783(Camk2g),	Cell growth and death	3	Cellular Processes	27
p53 signaling pathway	1	ENSRNOG00000008022(Apaf1),	Cell growth and death	3	Cellular Processes	27
Cell cycle	1	ENSRNOG00000027787(Cdc6),	Cell growth and death	3	Cellular Processes	27
Apoptosis	1	ENSRNOG00000008022(Apaf1),	Cell growth and death	3	Cellular Processes	27
Tight junction	5	ENSRNOG00000049695(Myh1),ENSRNOG00000046276(Myh3),ENSRNOG00000016983(Myh7),ENSRNOG00000025757(Myh6),ENSRNOG00000014409(Myl7),	Cellular community	8	Cellular Processes	27
Focal adhesion	3	ENSRNOG00000004276(Itga3),ENSRNOG00000014409(Myl7),ENSRNOG00000002215(Mylk),	Cellular community	8	Cellular Processes	27
Signaling pathways regulating pluripotency of stem cells	1	ENSRNOG00000013166(Wnt4),	Cellular community	8	Cellular Processes	27
Phagosome	5	ENSRNOG00000019629(Lamp1),ENSRNOG00000003622(Cybb),ENSRNOG00000038999(RT1-A1),ENSRNOG00000026762(RT1-DOa),ENSRNOG00000000457(Tap1),	Transport and catabolism	14	Cellular Processes	27
Endocytosis	6	ENSRNOG00000009571(Wipf3),ENSRNOG00000049115(Ccr5),ENSRNOG00000038999(RT1-A1),ENSRNOG00000014083(Iqsec3),ENSRNOG00000007744(Ehd3),ENSRNOG00000058940(Rab11fip1),	Transport and catabolism	14	Cellular Processes	27
Lysosome	3	ENSRNOG00000019629(Lamp1),ENSRNOG00000019212(Tpp1),ENSRNOG00000008064(Naga),	Transport and catabolism	14	Cellular Processes	27
Peroxisome	2	ENSRNOG00000016655(Pex6),ENSRNOG00000019630(Hacl1),	Transport and catabolism	14	Cellular Processes	27
Taste transduction	1	ENSRNOG00000006639(Scn9a),	Sensory system	3	Organismal Systems	34
Inflammatory mediator regulation of TRP channels	2	ENSRNOG00000059765(Asic1),ENSRNOG00000009783(Camk2g),	Sensory system	3	Organismal Systems	34
Olfactory transduction	1	ENSRNOG00000009783(Camk2g),	Sensory system	3	Organismal Systems	34
Circadian entrainment	2	ENSRNOG00000047080(Gng4),ENSRNOG00000009783(Camk2g),	Environmental adaptation	2	Organismal Systems	34
Thyroid hormone signaling pathway	3	ENSRNOG00000013166(Wnt4),ENSRNOG00000001285(Atp2a2),ENSRNOG00000025757(Myh6),	Endocrine system	12	Organismal Systems	34
Ovarian steroidogenesis	1	ENSRNOG00000019830(Hsd17b1),	Endocrine system	12	Organismal Systems	34
Glucagon signaling pathway	3	ENSRNOG00000003063(Phka1),ENSRNOG00000009783(Camk2g),ENSRNOG00000001189(Sik1),	Endocrine system	12	Organismal Systems	34
Oxytocin signaling pathway	5	ENSRNOG00000016448(Eef2k),ENSRNOG00000020482(Nfatc4),ENSRNOG00000009783(Camk2g),ENSRNOG00000002215(Mylk),ENSRNOG00000009348(Nos3),	Endocrine system	12	Organismal Systems	34
Insulin signaling pathway	1	ENSRNOG00000003063(Phka1),	Endocrine system	12	Organismal Systems	34
Melanogenesis	2	ENSRNOG00000013166(Wnt4),ENSRNOG00000009783(Camk2g),	Endocrine system	12	Organismal Systems	34
Estrogen signaling pathway	1	ENSRNOG00000009348(Nos3),	Endocrine system	12	Organismal Systems	34
Insulin secretion	1	ENSRNOG00000009783(Camk2g),	Endocrine system	12	Organismal Systems	34
GnRH signaling pathway	2	ENSRNOG00000009783(Camk2g),ENSRNOG00000002011(Gnrhr),	Endocrine system	12	Organismal Systems	34
Chemokine signaling pathway	3	ENSRNOG00000049115(Ccr5),ENSRNOG00000047080(Gng4),ENSRNOG00000031162(Ccl24),	Immune system	15	Organismal Systems	34
Platelet activation	3	ENSRNOG00000036745(Gna13),ENSRNOG00000002215(Mylk),ENSRNOG00000009348(Nos3),	Immune system	15	Organismal Systems	34
Intestinal immune network for IgA production	1	ENSRNOG00000026762(RT1-DOa),	Immune system	15	Organismal Systems	34
Hematopoietic cell lineage	1	ENSRNOG00000004276(Itga3),	Immune system	15	Organismal Systems	34
Antigen processing and presentation	3	ENSRNOG00000038999(RT1-A1),ENSRNOG00000026762(RT1-DOa),ENSRNOG00000000457(Tap1),	Immune system	15	Organismal Systems	34
Leukocyte transendothelial migration	3	ENSRNOG00000030118(Msn),ENSRNOG00000003622(Cybb),ENSRNOG00000014409(Myl7),	Immune system	15	Organismal Systems	34
T cell receptor signaling pathway	1	ENSRNOG00000003298(Cd247),	Immune system	15	Organismal Systems	34
B cell receptor signaling pathway	1	ENSRNOG00000032703(Rasgrp3),	Immune system	15	Organismal Systems	34
Natural killer cell mediated cytotoxicity	1	ENSRNOG00000003298(Cd247),	Immune system	15	Organismal Systems	34
Serotonergic synapse	2	ENSRNOG00000047080(Gng4),ENSRNOG00000002549(Htr5b),	Nervous system	5	Organismal Systems	34
Retrograde endocannabinoid signaling	1	ENSRNOG00000047080(Gng4),	Nervous system	5	Organismal Systems	34
Long-term depression	1	ENSRNOG00000036745(Gna13),	Nervous system	5	Organismal Systems	34
Dopaminergic synapse	2	ENSRNOG00000047080(Gng4),ENSRNOG00000009783(Camk2g),	Nervous system	5	Organismal Systems	34
Glutamatergic synapse	2	ENSRNOG00000013171(Grm2),ENSRNOG00000047080(Gng4),	Nervous system	5	Organismal Systems	34
GABAergic synapse	1	ENSRNOG00000047080(Gng4),	Nervous system	5	Organismal Systems	34
Long-term potentiation	1	ENSRNOG00000009783(Camk2g),	Nervous system	5	Organismal Systems	34
Cholinergic synapse	2	ENSRNOG00000047080(Gng4),ENSRNOG00000009783(Camk2g),	Nervous system	5	Organismal Systems	34
Neurotrophin signaling pathway	1	ENSRNOG00000009783(Camk2g),	Nervous system	5	Organismal Systems	34
Axon guidance	4	ENSRNOG00000013166(Wnt4),ENSRNOG00000020482(Nfatc4),ENSRNOG00000019220(Rhod),ENSRNOG00000009783(Camk2g),	Development	6	Organismal Systems	34
Osteoclast differentiation	1	ENSRNOG00000003622(Cybb),	Development	6	Organismal Systems	34
Dorso-ventral axis formation	1	ENSRNOG00000000934(Piwil1),	Development	6	Organismal Systems	34
Mineral absorption	1	ENSRNOG00000009620(Cybrd1),	Digestive system	4	Organismal Systems	34
Pancreatic secretion	1	ENSRNOG00000001285(Atp2a2),	Digestive system	4	Organismal Systems	34
Gastric acid secretion	2	ENSRNOG00000009783(Camk2g),ENSRNOG00000002215(Mylk),	Digestive system	4	Organismal Systems	34
Vascular smooth muscle contraction	2	ENSRNOG00000036745(Gna13),ENSRNOG00000002215(Mylk),	Circulatory system	7	Organismal Systems	34
Cardiac muscle contraction	4	ENSRNOG00000001285(Atp2a2),ENSRNOG00000016983(Myh7),ENSRNOG00000025757(Myh6),ENSRNOG00000034161(Cox6b1),	Circulatory system	7	Organismal Systems	34
Adrenergic signaling in cardiomyocytes	4	ENSRNOG00000001285(Atp2a2),ENSRNOG00000009783(Camk2g),ENSRNOG00000016983(Myh7),ENSRNOG00000025757(Myh6),	Circulatory system	7	Organismal Systems	34
Pyruvate metabolism	1	ENSRNOG00000007102(Acss1),	Carbohydrate metabolism	6	Metabolism	26
Galactose metabolism	1	ENSRNOG00000007023(Galm),	Carbohydrate metabolism	6	Metabolism	26
Propanoate metabolism	1	ENSRNOG00000007102(Acss1),	Carbohydrate metabolism	6	Metabolism	26
Glyoxylate and dicarboxylate metabolism	1	ENSRNOG00000024128(Aco2),	Carbohydrate metabolism	6	Metabolism	26
Pentose phosphate pathway	2	ENSRNOG00000056011(AC139950.1),ENSRNOG00000018326(Pgls),	Carbohydrate metabolism	6	Metabolism	26
Citrate cycle (TCA cycle)	1	ENSRNOG00000024128(Aco2),	Carbohydrate metabolism	6	Metabolism	26
Glycolysis / Gluconeogenesis	3	ENSRNOG00000007102(Acss1),ENSRNOG00000012436(Adh6),ENSRNOG00000007023(Galm),	Carbohydrate metabolism	6	Metabolism	26
Other types of O-glycan biosynthesis	1	ENSRNOG00000005234(Gxylt1),	Glycan biosynthesis and metabolism	2	Metabolism	26
Mucin type O-Glycan biosynthesis	1	ENSRNOG00000012037(Galnt7),	Glycan biosynthesis and metabolism	2	Metabolism	26
Steroid hormone biosynthesis	1	ENSRNOG00000019830(Hsd17b1),	Lipid metabolism	5	Metabolism	26
Sphingolipid metabolism	1	ENSRNOG00000036866(Acer3),	Lipid metabolism	5	Metabolism	26
Glycerophospholipid metabolism	1	ENSRNOG00000012358(Pcyt1b),	Lipid metabolism	5	Metabolism	26
Glycerolipid metabolism	1	ENSRNOG00000022268(Pnpla3),	Lipid metabolism	5	Metabolism	26
Fatty acid degradation	1	ENSRNOG00000012436(Adh6),	Lipid metabolism	5	Metabolism	26
Taurine and hypotaurine metabolism	1	ENSRNOG00000011573(Csad),	Metabolism of other amino acids	1	Metabolism	26
2-Oxocarboxylic acid metabolism	1	ENSRNOG00000024128(Aco2),	Global and overview maps	19	Metabolism	26
Metabolic pathways	19	ENSRNOG00000011573(Csad),ENSRNOG00000056011(AC139950.1),ENSRNOG00000007102(Acss1),ENSRNOG00000039859(Dnmt1),ENSRNOG00000001161(Gatc),ENSRNOG00000054724(Pycrl),ENSRNOG00000012436(Adh6),ENSRNOG00000012037(Galnt7),ENSRNOG00000022268(Pnpla3),ENSRNOG00000024128(Aco2),ENSRNOG00000007023(Galm),ENSRNOG00000034161(Cox6b1),ENSRNOG00000012358(Pcyt1b),ENSRNOG00000019830(Hsd17b1),ENSRNOG00000005193(Pfas),ENSR…	Global and overview maps	19	Metabolism	26
Biosynthesis of amino acids	3	ENSRNOG00000056011(AC139950.1),ENSRNOG00000054724(Pycrl),ENSRNOG00000024128(Aco2),	Global and overview maps	19	Metabolism	26
Carbon metabolism	4	ENSRNOG00000056011(AC139950.1),ENSRNOG00000007102(Acss1),ENSRNOG00000024128(Aco2),ENSRNOG00000018326(Pgls),	Global and overview maps	19	Metabolism	26
Nicotinate and nicotinamide metabolism	1	ENSRNOG00000011071(Nt5e),	Metabolism of cofactors and vitamins	4	Metabolism	26
Ubiquinone and other terpenoid-quinone biosynthesis	1	ENSRNOG00000050828(Vkorc1),	Metabolism of cofactors and vitamins	4	Metabolism	26
Retinol metabolism	1	ENSRNOG00000012436(Adh6),	Metabolism of cofactors and vitamins	4	Metabolism	26
Folate biosynthesis	1	ENSRNOG00000009250(Pts),	Metabolism of cofactors and vitamins	4	Metabolism	26
Oxidative phosphorylation	1	ENSRNOG00000034161(Cox6b1),	Energy metabolism	1	Metabolism	26
Cysteine and methionine metabolism	1	ENSRNOG00000039859(Dnmt1),	Amino acid metabolism	5	Metabolism	26
Glycine, serine and threonine metabolism	1	ENSRNOG00000055408(Gcat),	Amino acid metabolism	5	Metabolism	26
Tyrosine metabolism	1	ENSRNOG00000012436(Adh6),	Amino acid metabolism	5	Metabolism	26
Arginine biosynthesis	1	ENSRNOG00000009348(Nos3),	Amino acid metabolism	5	Metabolism	26
Arginine and proline metabolism	2	ENSRNOG00000054724(Pycrl),ENSRNOG00000009348(Nos3),	Amino acid metabolism	5	Metabolism	26
Metabolism of xenobiotics by cytochrome P450	1	ENSRNOG00000012436(Adh6),	Xenobiotics biodegradation and metabolism	1	Metabolism	26
Pyrimidine metabolism	3	ENSRNOG00000013110(Nudt2),ENSRNOG00000033206(Entpd5),ENSRNOG00000011071(Nt5e),	Nucleotide metabolism	6	Metabolism	26
Purine metabolism	6	ENSRNOG00000056011(AC139950.1),ENSRNOG00000052506(Ak3),ENSRNOG00000005193(Pfas),ENSRNOG00000013110(Nudt2),ENSRNOG00000033206(Entpd5),ENSRNOG00000011071(Nt5e),	Nucleotide metabolism	6	Metabolism	26
ABC transporters	1	ENSRNOG00000000457(Tap1),	Membrane transport	1	Environmental Information Processing	30
Neuroactive ligand-receptor interaction	5	ENSRNOG00000013171(Grm2),ENSRNOG00000019208(P2rx5),ENSRNOG00000002011(Gnrhr),ENSRNOG00000002549(Htr5b),ENSRNOG00000013610(Chrna5),	Signaling molecules and interaction	8	Environmental Information Processing	30
Cytokine-cytokine receptor interaction	2	ENSRNOG00000049115(Ccr5),ENSRNOG00000014265(Tnfrsf19),	Signaling molecules and interaction	8	Environmental Information Processing	30
ECM-receptor interaction	1	ENSRNOG00000004276(Itga3),	Signaling molecules and interaction	8	Environmental Information Processing	30
Rap1 signaling pathway	1	ENSRNOG00000032703(Rasgrp3),	Signal transduction	24	Environmental Information Processing	30
cGMP-PKG signaling pathway	6	ENSRNOG00000001285(Atp2a2),ENSRNOG00000020482(Nfatc4),ENSRNOG00000016983(Myh7),ENSRNOG00000036745(Gna13),ENSRNOG00000002215(Mylk),ENSRNOG00000009348(Nos3),	Signal transduction	24	Environmental Information Processing	30
VEGF signaling pathway	1	ENSRNOG00000009348(Nos3),	Signal transduction	24	Environmental Information Processing	30
Sphingolipid signaling pathway	2	ENSRNOG00000036745(Gna13),ENSRNOG00000009348(Nos3),	Signal transduction	24	Environmental Information Processing	30
cAMP signaling pathway	2	ENSRNOG00000001285(Atp2a2),ENSRNOG00000009783(Camk2g),	Signal transduction	24	Environmental Information Processing	30
Calcium signaling pathway	8	ENSRNOG00000001285(Atp2a2),ENSRNOG00000003063(Phka1),ENSRNOG00000019208(P2rx5),ENSRNOG00000009783(Camk2g),ENSRNOG00000002549(Htr5b),ENSRNOG00000001427(Orai2),ENSRNOG00000002215(Mylk),ENSRNOG00000009348(Nos3),	Signal transduction	24	Environmental Information Processing	30
Wnt signaling pathway	4	ENSRNOG00000013166(Wnt4),ENSRNOG00000020482(Nfatc4),ENSRNOG00000009783(Camk2g),ENSRNOG00000004345(Daam1),	Signal transduction	24	Environmental Information Processing	30
PI3K-Akt signaling pathway	3	ENSRNOG00000004276(Itga3),ENSRNOG00000047080(Gng4),ENSRNOG00000009348(Nos3),	Signal transduction	24	Environmental Information Processing	30
Hippo signaling pathway	3	ENSRNOG00000002866(Rassf6),ENSRNOG00000013166(Wnt4),ENSRNOG00000008065(Wwc1),	Signal transduction	24	Environmental Information Processing	30
ErbB signaling pathway	1	ENSRNOG00000009783(Camk2g),	Signal transduction	24	Environmental Information Processing	30
AMPK signaling pathway	2	ENSRNOG00000016448(Eef2k),ENSRNOG00000018901(Rab14),	Signal transduction	24	Environmental Information Processing	30
MAPK signaling pathway	3	ENSRNOG00000007887(Elk4),ENSRNOG00000025423(Map3k13),ENSRNOG00000032703(Rasgrp3),	Signal transduction	24	Environmental Information Processing	30
Hedgehog signaling pathway	1	ENSRNOG00000013166(Wnt4),	Signal transduction	24	Environmental Information Processing	30
Ras signaling pathway	3	ENSRNOG00000047080(Gng4),ENSRNOG00000012818(Ksr1),ENSRNOG00000032703(Rasgrp3),	Signal transduction	24	Environmental Information Processing	30
HIF-1 signaling pathway	3	ENSRNOG00000003622(Cybb),ENSRNOG00000009783(Camk2g),ENSRNOG00000009348(Nos3),	Signal transduction	24	Environmental Information Processing	30
Protein processing in endoplasmic reticulum	2	ENSRNOG00000006462(Ero1l),ENSRNOG00000001050(Eif2ak1),	Folding, sorting and degradation	7	Genetic Information Processing	18
Ubiquitin mediated proteolysis	2	ENSRNOG00000011663(Rnf7),ENSRNOG00000015734(Ube3a),	Folding, sorting and degradation	7	Genetic Information Processing	18
Proteasome	2	ENSRNOG00000007203(Psmc6),ENSRNOG00000001719(Psmd2),	Folding, sorting and degradation	7	Genetic Information Processing	18
SNARE interactions in vesicular transport	1	ENSRNOG00000003971(Gosr1),	Folding, sorting and degradation	7	Genetic Information Processing	18
mRNA surveillance pathway	1	ENSRNOG00000000841(Ddx39b),	Translation	6	Genetic Information Processing	18
RNA transport	3	ENSRNOG00000016133(Sumo1),ENSRNOG00000039829(Rpp14),ENSRNOG00000000841(Ddx39b),	Translation	6	Genetic Information Processing	18
Ribosome biogenesis in eukaryotes	2	ENSRNOG00000014049(Riok1),ENSRNOG00000002509(Gnl3l),	Translation	6	Genetic Information Processing	18
Aminoacyl-tRNA biosynthesis	1	ENSRNOG00000001161(Gatc),	Translation	6	Genetic Information Processing	18
Mismatch repair	1	ENSRNOG00000001134(Rfc5),	Replication and repair	2	Genetic Information Processing	18
Fanconi anemia pathway	1	ENSRNOG00000036699(RGD1306926),	Replication and repair	2	Genetic Information Processing	18
DNA replication	1	ENSRNOG00000001134(Rfc5),	Replication and repair	2	Genetic Information Processing	18
Nucleotide excision repair	1	ENSRNOG00000001134(Rfc5),	Replication and repair	2	Genetic Information Processing	18
Basal transcription factors	1	ENSRNOG00000004300(Gtf2a1),	Transcription	4	Genetic Information Processing	18
Spliceosome	3	ENSRNOG00000007629(Sf3a3),ENSRNOG00000052968(Hnrnpa3),ENSRNOG00000000841(Ddx39b),	Transcription	4	Genetic Information Processing	18
