# Supplementary material for: LncRNAs down-regulate Myh1, Casr, and Mis18a expression in the Substantia Nigra of aged male rats
Source: Aging (Albany NY). 2019 Oct 2;11(19):8313–28. doi: 10.18632/aging.102321 (PMC6814601; doi:10.18632/aging.102321)
Supplement: Supplementary Table 14 [file aging-11-102321-s014.xlsx]

## Sheet: Table 14
pathway_ID	PATHWAY_DES	target_gene_in_this_pathway	target_gene_in_all_pathway	all_gene_in_this_pathway	all_gene_in_all_pathway	all_gene_list	rich_factor	Pvalue	Qvalue
rno00430	Taurine and hypotaurine metabolism	1	105	7	7055	ENSRNOG00000011573(Csad),	9.59864	1	1
rno00130	Ubiquinone and other terpenoid-quinone biosynthesis	1	105	10	7055	ENSRNOG00000050828(Vkorc1),	6.71905	1	1
rno00790	Folate biosynthesis	1	105	12	7055	ENSRNOG00000009250(Pts),	5.59921	1	1
rno00030	Pentose phosphate pathway	2	105	28	7055	ENSRNOG00000056011(AC139950.1),ENSRNOG00000018326(Pgls),	4.79932	0.0185286	0.524978
rno00603	Glycosphingolipid biosynthesis - globo series	1	105	14	7055	ENSRNOG00000008064(Naga),	4.79932	1	1
rno00533	Glycosaminoglycan biosynthesis - keratan sulfate	1	105	16	7055	ENSRNOG00000016953(Chst4),	4.1994	1	1
rno05416	Viral myocarditis	4	105	69	7055	ENSRNOG00000038999(RT1-A1),ENSRNOG00000026762(RT1-DOa),ENSRNOG00000016983(Myh7),ENSRNOG00000025757(Myh6),	3.8951	0.00900739	0.765628
rno01210	2-Oxocarboxylic acid metabolism	1	105	19	7055	ENSRNOG00000024128(Aco2),	3.53634	1	1
rno00220	Arginine biosynthesis	1	105	19	7055	ENSRNOG00000009348(Nos3),	3.53634	1	1
rno04260	Cardiac muscle contraction	4	105	79	7055	ENSRNOG00000001285(Atp2a2),ENSRNOG00000016983(Myh7),ENSRNOG00000025757(Myh6),ENSRNOG00000034161(Cox6b1),	3.40205	0.0156226	0.885282
rno05410	Hypertrophic cardiomyopathy (HCM)	4	105	79	7055	ENSRNOG00000001285(Atp2a2),ENSRNOG00000004276(Itga3),ENSRNOG00000016983(Myh7),ENSRNOG00000025757(Myh6),	3.40205	0.0156226	0.885282
rno00010	Glycolysis / Gluconeogenesis	3	105	61	7055	ENSRNOG00000007102(Acss1),ENSRNOG00000012436(Adh6),ENSRNOG00000007023(Galm),	3.30445	0.0295046	0.626973
rno05414	Dilated cardiomyopathy	4	105	82	7055	ENSRNOG00000001285(Atp2a2),ENSRNOG00000004276(Itga3),ENSRNOG00000016983(Myh7),ENSRNOG00000025757(Myh6),	3.27758	0.0181271	0.616322
rno04020	Calcium signaling pathway	8	105	166	7055	ENSRNOG00000001285(Atp2a2),ENSRNOG00000003063(Phka1),ENSRNOG00000019208(P2rx5),ENSRNOG00000009783(Camk2g),ENSRNOG00000002549(Htr5b),ENSRNOG00000001427(Orai2),ENSRNOG00000002215(Mylk),ENSRNOG00000009348(Nos3),	3.2381	0.00266013	0.452223
rno03430	Mismatch repair	1	105	22	7055	ENSRNOG00000001134(Rfc5),	3.05411	1	1
rno05412	Arrhythmogenic right ventricular cardiomyopathy (ARVC)	3	105	67	7055	ENSRNOG00000001285(Atp2a2),ENSRNOG00000004276(Itga3),ENSRNOG00000015602(Cdh2),	3.00853	0.0399728	0.617762
rno03050	Proteasome	2	105	45	7055	ENSRNOG00000007203(Psmc6),ENSRNOG00000001719(Psmd2),	2.98624	0.0635785	0.772024
rno05332	Graft-versus-host disease	2	105	47	7055	ENSRNOG00000038999(RT1-A1),ENSRNOG00000026762(RT1-DOa),	2.85917	0.070848	0.70848
rno00330	Arginine and proline metabolism	2	105	48	7055	ENSRNOG00000054724(Pycrl),ENSRNOG00000009348(Nos3),	2.7996	0.0746355	0.704891
rno04320	Dorso-ventral axis formation	1	105	24	7055	ENSRNOG00000000934(Piwil1),	2.7996	1	1
rno05330	Allograft rejection	2	105	49	7055	ENSRNOG00000038999(RT1-A1),ENSRNOG00000026762(RT1-DOa),	2.74247	0.0785241	0.667454
rno00512	Mucin type O-Glycan biosynthesis	1	105	25	7055	ENSRNOG00000012037(Galnt7),	2.68762	1	1
rno04612	Antigen processing and presentation	3	105	76	7055	ENSRNOG00000038999(RT1-A1),ENSRNOG00000026762(RT1-DOa),ENSRNOG00000000457(Tap1),	2.65226	0.0594733	0.777728
rno04530	Tight junction	5	105	132	7055	ENSRNOG00000049695(Myh1),ENSRNOG00000046276(Myh3),ENSRNOG00000016983(Myh7),ENSRNOG00000025757(Myh6),ENSRNOG00000014409(Myl7),	2.54509	0.0339256	0.576736
rno04022	cGMP-PKG signaling pathway	6	105	159	7055	ENSRNOG00000001285(Atp2a2),ENSRNOG00000020482(Nfatc4),ENSRNOG00000016983(Myh7),ENSRNOG00000036745(Gna13),ENSRNOG00000002215(Mylk),ENSRNOG00000009348(Nos3),	2.53549	0.0246027	0.597495
rno01230	Biosynthesis of amino acids	3	105	80	7055	ENSRNOG00000056011(AC139950.1),ENSRNOG00000054724(Pycrl),ENSRNOG00000024128(Aco2),	2.51964	0.0696478	0.740008
rno00052	Galactose metabolism	1	105	27	7055	ENSRNOG00000007023(Galm),	2.48854	1	1
rno04940	Type I diabetes mellitus	2	105	56	7055	ENSRNOG00000038999(RT1-A1),ENSRNOG00000026762(RT1-DOa),	2.39966	0.108508	0.768601
rno04922	Glucagon signaling pathway	3	105	84	7055	ENSRNOG00000003063(Phka1),ENSRNOG00000009783(Camk2g),ENSRNOG00000001189(Sik1),	2.39966	0.080762	0.653788
rno05320	Autoimmune thyroid disease	2	105	56	7055	ENSRNOG00000038999(RT1-A1),ENSRNOG00000026762(RT1-DOa),	2.39966	0.108508	0.768601
rno05310	Asthma	1	105	28	7055	ENSRNOG00000026762(RT1-DOa),	2.39966	1	1
rno00630	Glyoxylate and dicarboxylate metabolism	1	105	28	7055	ENSRNOG00000024128(Aco2),	2.39966	1	1
rno00230	Purine metabolism	6	105	169	7055	ENSRNOG00000056011(AC139950.1),ENSRNOG00000052506(Ak3),ENSRNOG00000005193(Pfas),ENSRNOG00000013110(Nudt2),ENSRNOG00000033206(Entpd5),ENSRNOG00000011071(Nt5e),	2.38546	0.0330634	0.624531
rno01200	Carbon metabolism	4	105	116	7055	ENSRNOG00000056011(AC139950.1),ENSRNOG00000007102(Acss1),ENSRNOG00000024128(Aco2),ENSRNOG00000018326(Pgls),	2.31691	0.0673251	0.763018
rno00514	Other types of O-glycan biosynthesis	1	105	29	7055	ENSRNOG00000005234(Gxylt1),	2.31691	1	1
rno04921	Oxytocin signaling pathway	5	105	150	7055	ENSRNOG00000016448(Eef2k),ENSRNOG00000020482(Nfatc4),ENSRNOG00000009783(Camk2g),ENSRNOG00000002215(Mylk),ENSRNOG00000009348(Nos3),	2.23968	0.0580694	0.822649
rno04130	SNARE interactions in vesicular transport	1	105	30	7055	ENSRNOG00000003971(Gosr1),	2.23968	1	1
rno00640	Propanoate metabolism	1	105	30	7055	ENSRNOG00000007102(Acss1),	2.23968	1	1
rno00020	Citrate cycle (TCA cycle)	1	105	31	7055	ENSRNOG00000024128(Aco2),	2.16743	1	1
rno00760	Nicotinate and nicotinamide metabolism	1	105	31	7055	ENSRNOG00000011071(Nt5e),	2.16743	1	1
rno04145	Phagosome	5	105	160	7055	ENSRNOG00000019629(Lamp1),ENSRNOG00000003622(Cybb),ENSRNOG00000038999(RT1-A1),ENSRNOG00000026762(RT1-DOa),ENSRNOG00000000457(Tap1),	2.0997	0.0753608	0.674281
rno05152	Tuberculosis	5	105	164	7055	ENSRNOG00000019629(Lamp1),ENSRNOG00000008022(Apaf1),ENSRNOG00000009783(Camk2g),ENSRNOG00000026762(RT1-DOa),ENSRNOG00000012818(Ksr1),	2.04849	0.0830962	0.642107
rno00240	Pyrimidine metabolism	3	105	100	7055	ENSRNOG00000013110(Nudt2),ENSRNOG00000033206(Entpd5),ENSRNOG00000011071(Nt5e),	2.01571	0.134553	0.816932
rno04971	Gastric acid secretion	2	105	67	7055	ENSRNOG00000009783(Camk2g),ENSRNOG00000002215(Mylk),	2.00569	0.164793	0.933829
rno04066	HIF-1 signaling pathway	3	105	101	7055	ENSRNOG00000003622(Cybb),ENSRNOG00000009783(Camk2g),ENSRNOG00000009348(Nos3),	1.99576	0.138401	0.811317
rno03030	DNA replication	1	105	34	7055	ENSRNOG00000001134(Rfc5),	1.97619	1	1
rno04310	Wnt signaling pathway	4	105	137	7055	ENSRNOG00000013166(Wnt4),ENSRNOG00000020482(Nfatc4),ENSRNOG00000009783(Camk2g),ENSRNOG00000004345(Daam1),	1.96177	0.119714	0.782748
rno04261	Adrenergic signaling in cardiomyocytes	4	105	139	7055	ENSRNOG00000001285(Atp2a2),ENSRNOG00000009783(Camk2g),ENSRNOG00000016983(Myh7),ENSRNOG00000025757(Myh6),	1.93354	0.125629	0.791
rno05203	Viral carcinogenesis	6	105	211	7055	ENSRNOG00000049115(Ccr5),ENSRNOG00000038999(RT1-A1),ENSRNOG00000004300(Gtf2a1),ENSRNOG00000004158(Hdac9),ENSRNOG00000015734(Ube3a),ENSRNOG00000032224(Hist1h4b),	1.91063	0.0906312	0.669883
rno00350	Tyrosine metabolism	1	105	36	7055	ENSRNOG00000012436(Adh6),	1.8664	1	1
rno00620	Pyruvate metabolism	1	105	37	7055	ENSRNOG00000007102(Acss1),	1.81596	1	1
rno04919	Thyroid hormone signaling pathway	3	105	112	7055	ENSRNOG00000013166(Wnt4),ENSRNOG00000001285(Atp2a2),ENSRNOG00000025757(Myh6),	1.79974	0.184309	1
rno04670	Leukocyte transendothelial migration	3	105	113	7055	ENSRNOG00000030118(Msn),ENSRNOG00000003622(Cybb),ENSRNOG00000014409(Myl7),	1.78382	0.188798	1
rno05340	Primary immunodeficiency	1	105	38	7055	ENSRNOG00000000457(Tap1),	1.76817	1	1
rno04611	Platelet activation	3	105	116	7055	ENSRNOG00000036745(Gna13),ENSRNOG00000002215(Mylk),ENSRNOG00000009348(Nos3),	1.73768	0.202565	0.956557
rno03008	Ribosome biogenesis in eukaryotes	2	105	78	7055	ENSRNOG00000014049(Riok1),ENSRNOG00000002509(Gnl3l),	1.72283	0.230895	1
rno04142	Lysosome	3	105	117	7055	ENSRNOG00000019629(Lamp1),ENSRNOG00000019212(Tpp1),ENSRNOG00000008064(Naga),	1.72283	0.207253	0.952244
rno00260	Glycine, serine and threonine metabolism	1	105	39	7055	ENSRNOG00000055408(Gcat),	1.72283	1	1
rno05164	Influenza A	4	105	161	7055	ENSRNOG00000026762(RT1-DOa),ENSRNOG00000051711(Kpna1),ENSRNOG00000000841(Ddx39b),ENSRNOG00000001050(Eif2ak1),	1.66933	0.201039	0.976474
rno04146	Peroxisome	2	105	82	7055	ENSRNOG00000016655(Pex6),ENSRNOG00000019630(Hacl1),	1.63879	0.257018	1
rno04810	Regulation of actin cytoskeleton	5	105	205	7055	ENSRNOG00000030118(Msn),ENSRNOG00000004276(Itga3),ENSRNOG00000014409(Myl7),ENSRNOG00000036745(Gna13),ENSRNOG00000002215(Mylk),	1.63879	0.190227	0.979955
rno05222	Small cell lung cancer	2	105	83	7055	ENSRNOG00000004276(Itga3),ENSRNOG00000008022(Apaf1),	1.61905	0.263704	1
rno04912	GnRH signaling pathway	2	105	84	7055	ENSRNOG00000009783(Camk2g),ENSRNOG00000002011(Gnrhr),	1.59977	0.27045	1
rno02010	ABC transporters	1	105	42	7055	ENSRNOG00000000457(Tap1),	1.59977	1	1
rno04713	Circadian entrainment	2	105	85	7055	ENSRNOG00000047080(Gng4),ENSRNOG00000009783(Camk2g),	1.58095	0.277253	1
rno04144	Endocytosis	6	105	256	7055	ENSRNOG00000009571(Wipf3),ENSRNOG00000049115(Ccr5),ENSRNOG00000038999(RT1-A1),ENSRNOG00000014083(Iqsec3),ENSRNOG00000007744(Ehd3),ENSRNOG00000058940(Rab11fip1),	1.57478	0.197915	0.989574
rno04360	Axon guidance	4	105	171	7055	ENSRNOG00000013166(Wnt4),ENSRNOG00000020482(Nfatc4),ENSRNOG00000019220(Rhod),ENSRNOG00000009783(Camk2g),	1.57171	0.241259	1
rno03040	Spliceosome	3	105	129	7055	ENSRNOG00000007629(Sf3a3),ENSRNOG00000052968(Hnrnpa3),ENSRNOG00000000841(Ddx39b),	1.56257	0.267139	1
rno03420	Nucleotide excision repair	1	105	43	7055	ENSRNOG00000001134(Rfc5),	1.56257	1	1
rno05166	HTLV-I infection	6	105	263	7055	ENSRNOG00000013166(Wnt4),ENSRNOG00000038999(RT1-A1),ENSRNOG00000020482(Nfatc4),ENSRNOG00000007887(Elk4),ENSRNOG00000026762(RT1-DOa),ENSRNOG00000011975(Crtc3),	1.53286	0.218947	0.9795
rno03022	Basal transcription factors	1	105	44	7055	ENSRNOG00000004300(Gtf2a1),	1.52706	1	1
rno04672	Intestinal immune network for IgA production	1	105	44	7055	ENSRNOG00000026762(RT1-DOa),	1.52706	1	1
rno05030	Cocaine addiction	1	105	44	7055	ENSRNOG00000013171(Grm2),	1.52706	1	1
rno04916	Melanogenesis	2	105	89	7055	ENSRNOG00000013166(Wnt4),ENSRNOG00000009783(Camk2g),	1.5099	0.305017	1
rno04978	Mineral absorption	1	105	45	7055	ENSRNOG00000009620(Cybrd1),	1.49312	1	1
rno00270	Cysteine and methionine metabolism	1	105	45	7055	ENSRNOG00000039859(Dnmt1),	1.49312	1	1
rno00970	Aminoacyl-tRNA biosynthesis	1	105	46	7055	ENSRNOG00000001161(Gatc),	1.46066	1	1
rno03460	Fanconi anemia pathway	1	105	46	7055	ENSRNOG00000036699(RGD1306926),	1.46066	1	1
rno00071	Fatty acid degradation	1	105	46	7055	ENSRNOG00000012436(Adh6),	1.46066	1	1
rno04514	Cell adhesion molecules (CAMs)	3	105	142	7055	ENSRNOG00000038999(RT1-A1),ENSRNOG00000026762(RT1-DOa),ENSRNOG00000015602(Cdh2),	1.41952	0.338755	1
rno04390	Hippo signaling pathway	3	105	143	7055	ENSRNOG00000002866(Rassf6),ENSRNOG00000013166(Wnt4),ENSRNOG00000008065(Wwc1),	1.40959	0.344517	1
rno05168	Herpes simplex infection	4	105	191	7055	ENSRNOG00000038999(RT1-A1),ENSRNOG00000026762(RT1-DOa),ENSRNOG00000000457(Tap1),ENSRNOG00000001050(Eif2ak1),	1.40713	0.331479	1
rno00600	Sphingolipid metabolism	1	105	48	7055	ENSRNOG00000036866(Acer3),	1.3998	1	1
rno04340	Hedgehog signaling pathway	1	105	49	7055	ENSRNOG00000013166(Wnt4),	1.37123	1	1
rno03013	RNA transport	3	105	150	7055	ENSRNOG00000016133(Sumo1),ENSRNOG00000039829(Rpp14),ENSRNOG00000000841(Ddx39b),	1.34381	0.385735	1
rno05169	Epstein-Barr virus infection	4	105	200	7055	ENSRNOG00000038999(RT1-A1),ENSRNOG00000007203(Psmc6),ENSRNOG00000001719(Psmd2),ENSRNOG00000001050(Eif2ak1),	1.34381	0.375769	1
rno05014	Amyotrophic lateral sclerosis (ALS)	1	105	50	7055	ENSRNOG00000008022(Apaf1),	1.34381	1	1
rno04933	AGE-RAGE signaling pathway in diabetic complications	2	105	102	7055	ENSRNOG00000003622(Cybb),ENSRNOG00000009348(Nos3),	1.31746	0.400409	1
rno04724	Glutamatergic synapse	2	105	103	7055	ENSRNOG00000013171(Grm2),ENSRNOG00000047080(Gng4),	1.30467	0.408017	1
rno04913	Ovarian steroidogenesis	1	105	52	7055	ENSRNOG00000019830(Hsd17b1),	1.29212	1	1
rno05217	Basal cell carcinoma	1	105	52	7055	ENSRNOG00000013166(Wnt4),	1.29212	1	1
rno04750	Inflammatory mediator regulation of TRP channels	2	105	105	7055	ENSRNOG00000059765(Asic1),ENSRNOG00000009783(Camk2g),	1.27982	0.423327	1
rno04725	Cholinergic synapse	2	105	106	7055	ENSRNOG00000047080(Gng4),ENSRNOG00000009783(Camk2g),	1.26774	0.431026	1
rno05150	Staphylococcus aureus infection	1	105	53	7055	ENSRNOG00000026762(RT1-DOa),	1.26774	1	1
rno05034	Alcoholism	3	105	162	7055	ENSRNOG00000047080(Gng4),ENSRNOG00000004158(Hdac9),ENSRNOG00000032224(Hist1h4b),	1.24427	0.459505	1
rno04080	Neuroactive ligand-receptor interaction	5	105	272	7055	ENSRNOG00000013171(Grm2),ENSRNOG00000019208(P2rx5),ENSRNOG00000002011(Gnrhr),ENSRNOG00000002549(Htr5b),ENSRNOG00000013610(Chrna5),	1.23512	0.462561	1
rno04270	Vascular smooth muscle contraction	2	105	110	7055	ENSRNOG00000036745(Gna13),ENSRNOG00000002215(Mylk),	1.22165	0.462094	1
rno04730	Long-term depression	1	105	56	7055	ENSRNOG00000036745(Gna13),	1.19983	1	1
rno04720	Long-term potentiation	1	105	56	7055	ENSRNOG00000009783(Camk2g),	1.19983	1	1
rno05134	Legionellosis	1	105	57	7055	ENSRNOG00000008022(Apaf1),	1.17878	1	1
rno05010	Alzheimer's disease	3	105	172	7055	ENSRNOG00000001285(Atp2a2),ENSRNOG00000008022(Apaf1),ENSRNOG00000034161(Cox6b1),	1.17193	0.523295	1
rno05145	Toxoplasmosis	2	105	115	7055	ENSRNOG00000049115(Ccr5),ENSRNOG00000026762(RT1-DOa),	1.16853	0.501442	1
rno04726	Serotonergic synapse	2	105	115	7055	ENSRNOG00000047080(Gng4),ENSRNOG00000002549(Htr5b),	1.16853	0.501442	1
rno04062	Chemokine signaling pathway	3	105	173	7055	ENSRNOG00000049115(Ccr5),ENSRNOG00000047080(Gng4),ENSRNOG00000031162(Ccl24),	1.16515	0.529763	1
rno05031	Amphetamine addiction	1	105	58	7055	ENSRNOG00000009783(Camk2g),	1.15846	1	1
rno04071	Sphingolipid signaling pathway	2	105	118	7055	ENSRNOG00000036745(Gna13),ENSRNOG00000009348(Nos3),	1.13882	0.525269	1
rno04370	VEGF signaling pathway	1	105	59	7055	ENSRNOG00000009348(Nos3),	1.13882	1	1
rno04728	Dopaminergic synapse	2	105	120	7055	ENSRNOG00000047080(Gng4),ENSRNOG00000009783(Camk2g),	1.11984	0.541225	1
rno05322	Systemic lupus erythematosus	2	105	120	7055	ENSRNOG00000026762(RT1-DOa),ENSRNOG00000032224(Hist1h4b),	1.11984	0.541225	1
rno00561	Glycerolipid metabolism	1	105	60	7055	ENSRNOG00000022268(Pnpla3),	1.11984	1	1
rno04152	AMPK signaling pathway	2	105	121	7055	ENSRNOG00000016448(Eef2k),ENSRNOG00000018901(Rab14),	1.11059	0.549221	1
rno05214	Glioma	1	105	61	7055	ENSRNOG00000009783(Camk2g),	1.10148	1	1
rno05162	Measles	2	105	126	7055	ENSRNOG00000030118(Msn),ENSRNOG00000001050(Eif2ak1),	1.06652	0.589342	1
rno05321	Inflammatory bowel disease (IBD)	1	105	63	7055	ENSRNOG00000026762(RT1-DOa),	1.06652	1	1
rno05205	Proteoglycans in cancer	3	105	191	7055	ENSRNOG00000030118(Msn),ENSRNOG00000013166(Wnt4),ENSRNOG00000009783(Camk2g),	1.05535	0.647968	1
rno04120	Ubiquitin mediated proteolysis	2	105	128	7055	ENSRNOG00000011663(Rnf7),ENSRNOG00000015734(Ube3a),	1.04985	0.605436	1
rno00980	Metabolism of xenobiotics by cytochrome P450	1	105	64	7055	ENSRNOG00000012436(Adh6),	1.04985	1	1
rno01100	Metabolic pathways	19	105	1223	7055	ENSRNOG00000011573(Csad),ENSRNOG00000056011(AC139950.1),ENSRNOG00000007102(Acss1),ENSRNOG00000039859(Dnmt1),ENSRNOG00000001161(Gatc),ENSRNOG00000054724(Pycrl),ENSRNOG00000012436(Adh6),ENSRNOG00000012037(Galnt7),ENSRNOG00000022268(Pnpla3),ENSRNOG00000024128(Aco2),ENSRNOG00000007023(Galm),ENSRNOG00000034161(Cox6b1),ENSRNOG00000012358(Pcyt1b),ENSRNOG00000019830(Hsd17b1),ENSRNOG00000005193(Pfas),ENSR…	1.04384	0.773598	1
rno04510	Focal adhesion	3	105	195	7055	ENSRNOG00000004276(Itga3),ENSRNOG00000014409(Myl7),ENSRNOG00000002215(Mylk),	1.0337	0.674503	1
rno00982	Drug metabolism - cytochrome P450	1	105	66	7055	ENSRNOG00000012436(Adh6),	1.01804	1	1
rno04115	p53 signaling pathway	1	105	67	7055	ENSRNOG00000008022(Apaf1),	1.00284	1	1
rno05161	Hepatitis B	2	105	135	7055	ENSRNOG00000020482(Nfatc4),ENSRNOG00000008022(Apaf1),	0.995414	1	1
rno05140	Leishmaniasis	1	105	69	7055	ENSRNOG00000026762(RT1-DOa),	0.973775	1	1
rno04072	Phospholipase D signaling pathway	2	105	139	7055	ENSRNOG00000013171(Grm2),ENSRNOG00000036745(Gna13),	0.966769	1	1
rno04662	B cell receptor signaling pathway	1	105	70	7055	ENSRNOG00000032703(Rasgrp3),	0.959864	1	1
rno05012	Parkinson's disease	2	105	145	7055	ENSRNOG00000008022(Apaf1),ENSRNOG00000034161(Cox6b1),	0.926765	1	1
rno04014	Ras signaling pathway	3	105	220	7055	ENSRNOG00000047080(Gng4),ENSRNOG00000012818(Ksr1),ENSRNOG00000032703(Rasgrp3),	0.916234	1	1
rno04925	Aldosterone synthesis and secretion	1	105	76	7055	ENSRNOG00000009783(Camk2g),	0.884085	1	1
rno04512	ECM-receptor interaction	1	105	76	7055	ENSRNOG00000004276(Itga3),	0.884085	1	1
rno05200	Pathways in cancer	5	105	380	7055	ENSRNOG00000013166(Wnt4),ENSRNOG00000004276(Itga3),ENSRNOG00000047080(Gng4),ENSRNOG00000036745(Gna13),ENSRNOG00000032703(Rasgrp3),	0.884085	1	1
rno00830	Retinol metabolism	1	105	78	7055	ENSRNOG00000012436(Adh6),	0.861416	1	1
rno00140	Steroid hormone biosynthesis	1	105	78	7055	ENSRNOG00000019830(Hsd17b1),	0.861416	1	1
rno05202	Transcriptional misregulation in cancer	2	105	157	7055	ENSRNOG00000007887(Elk4),ENSRNOG00000047620(Golph3l),	0.85593	1	1
rno04141	Protein processing in endoplasmic reticulum	2	105	158	7055	ENSRNOG00000006462(Ero1l),ENSRNOG00000001050(Eif2ak1),	0.850512	1	1
rno04911	Insulin secretion	1	105	81	7055	ENSRNOG00000009783(Camk2g),	0.829512	1	1
rno04640	Hematopoietic cell lineage	1	105	81	7055	ENSRNOG00000004276(Itga3),	0.829512	1	1
rno03015	mRNA surveillance pathway	1	105	81	7055	ENSRNOG00000000841(Ddx39b),	0.829512	1	1
rno05204	Chemical carcinogenesis	1	105	83	7055	ENSRNOG00000012436(Adh6),	0.809524	1	1
rno04010	MAPK signaling pathway	3	105	249	7055	ENSRNOG00000007887(Elk4),ENSRNOG00000025423(Map3k13),ENSRNOG00000032703(Rasgrp3),	0.809524	1	1
rno05323	Rheumatoid arthritis	1	105	84	7055	ENSRNOG00000026762(RT1-DOa),	0.799887	1	1
rno04742	Taste transduction	1	105	85	7055	ENSRNOG00000006639(Scn9a),	0.790476	1	1
rno04727	GABAergic synapse	1	105	85	7055	ENSRNOG00000047080(Gng4),	0.790476	1	1
rno05032	Morphine addiction	1	105	86	7055	ENSRNOG00000047080(Gng4),	0.781285	1	1
rno04012	ErbB signaling pathway	1	105	89	7055	ENSRNOG00000009783(Camk2g),	0.754949	1	1
rno04915	Estrogen signaling pathway	1	105	91	7055	ENSRNOG00000009348(Nos3),	0.738357	1	1
rno04024	cAMP signaling pathway	2	105	183	7055	ENSRNOG00000001285(Atp2a2),ENSRNOG00000009783(Camk2g),	0.734322	1	1
rno00564	Glycerophospholipid metabolism	1	105	92	7055	ENSRNOG00000012358(Pcyt1b),	0.730331	1	1
rno04650	Natural killer cell mediated cytotoxicity	1	105	94	7055	ENSRNOG00000003298(Cd247),	0.714792	1	1
rno04972	Pancreatic secretion	1	105	94	7055	ENSRNOG00000001285(Atp2a2),	0.714792	1	1
rno05016	Huntington's disease	2	105	190	7055	ENSRNOG00000008022(Apaf1),ENSRNOG00000034161(Cox6b1),	0.707268	1	1
rno04723	Retrograde endocannabinoid signaling	1	105	96	7055	ENSRNOG00000047080(Gng4),	0.699901	1	1
rno05231	Choline metabolism in cancer	1	105	98	7055	ENSRNOG00000012358(Pcyt1b),	0.685617	1	1
rno05142	Chagas disease (American trypanosomiasis)	1	105	103	7055	ENSRNOG00000003298(Cd247),	0.652335	1	1
rno04151	PI3K-Akt signaling pathway	3	105	315	7055	ENSRNOG00000004276(Itga3),ENSRNOG00000047080(Gng4),ENSRNOG00000009348(Nos3),	0.639909	1	1
rno04114	Oocyte meiosis	1	105	106	7055	ENSRNOG00000009783(Camk2g),	0.633872	1	1
rno04660	T cell receptor signaling pathway	1	105	107	7055	ENSRNOG00000003298(Cd247),	0.627948	1	1
rno04931	Insulin resistance	1	105	107	7055	ENSRNOG00000009348(Nos3),	0.627948	1	1
rno04060	Cytokine-cytokine receptor interaction	2	105	215	7055	ENSRNOG00000049115(Ccr5),ENSRNOG00000014265(Tnfrsf19),	0.625028	1	1
rno04722	Neurotrophin signaling pathway	1	105	118	7055	ENSRNOG00000009783(Camk2g),	0.569411	1	1
rno04110	Cell cycle	1	105	121	7055	ENSRNOG00000027787(Cdc6),	0.555293	1	1
rno05160	Hepatitis C	1	105	124	7055	ENSRNOG00000001050(Eif2ak1),	0.541859	1	1
rno04910	Insulin signaling pathway	1	105	125	7055	ENSRNOG00000003063(Phka1),	0.537524	1	1
rno04210	Apoptosis	1	105	130	7055	ENSRNOG00000008022(Apaf1),	0.51685	1	1
rno04380	Osteoclast differentiation	1	105	131	7055	ENSRNOG00000003622(Cybb),	0.512904	1	1
rno04550	Signaling pathways regulating pluripotency of stem cells	1	105	137	7055	ENSRNOG00000013166(Wnt4),	0.490441	1	1
rno05206	MicroRNAs in cancer	1	105	138	7055	ENSRNOG00000039859(Dnmt1),	0.486888	1	1
rno00190	Oxidative phosphorylation	1	105	138	7055	ENSRNOG00000034161(Cox6b1),	0.486888	1	1
rno04932	Non-alcoholic fatty liver disease (NAFLD)	1	105	156	7055	ENSRNOG00000034161(Cox6b1),	0.430708	1	1
rno04015	Rap1 signaling pathway	1	105	202	7055	ENSRNOG00000032703(Rasgrp3),	0.332626	1	1
rno04740	Olfactory transduction	1	105	1172	7055	ENSRNOG00000009783(Camk2g),	0.0573298	1	1
