# Supplementary material for: LncRNAs down-regulate Myh1, Casr, and Mis18a expression in the Substantia Nigra of aged male rats
Source: Aging (Albany NY). 2019 Oct 2;11(19):8313–28. doi: 10.18632/aging.102321 (PMC6814601; doi:10.18632/aging.102321)
Supplement: Supplementary Table 15 [file aging-11-102321-s016.xlsx]

## Sheet: Table 15
circRNA_id	known_circRNA	locus	circRNA_type	1_SRPBM	2_SRPBM	3_SRPBM	4_SRPBM	5_SRPBM	6_SRPBM	6Mon	24Mon	log2FC	Pvalue	Qvalue	updown	gene_id	gene_name	description	locus	1_FPKM	2_FPKM	3_FPKM	4_FPKM	5_FPKM	6_FPKM	6Mon	24Mon	log2FC	Pvalue	Qvalue	updown
circRNA.6450	-	2:197906758|197913548(-)	exon	0.509168	0.621293	0.632168	0	0	0	0.587543	0	#NAME?	6.1124e-06	0.0395178	DOWN	ENSRNOG00000054294	Rprd2	regulation of nuclear pre-mRNA domain containing 2 [Source:MGI Symbol;Acc:MGI:1922387]	2:197886160-197935567	18.9088	19.3992	19.4842	21.0615	19.8156	19.3099	19.2641	20.0623	0.0585778	0.408244	0.963188	-
circRNA.2908	-	16:23555922|23600154(+)	exon	0.581906	0.543632	0.351204	0	0	0	0.492247	0	#NAME?	6.15044e-05	0.206388	DOWN	ENSRNOG00000013884	Psd3	pleckstrin and Sec7 domain containing 3 [Source:RGD Symbol;Acc:1559968]	16:23447366-23781604	52.1181	48.6715	48.5741	47.0495	45.512	55.6164	49.7879	49.3926	-0.0114999	0.931383	1	-
circRNA.10007	-	6:135672583|135696475(+)	exon	0	0	0.140482	0.671348	0.178664	0.543262	0.0468272	0.464425	3.31002	0.0110683	1	UP	ENSRNOG00000008145	Traf3	Tnf receptor-associated factor 3 [Source:RGD Symbol;Acc:1304633]	6:135610743-135718564	12.7528	12.5703	11.9952	10.5488	10.0117	10.186	12.4395	10.2488	-0.279466	0.000442161	0.026578	-
circRNA.10101	-	6:22373412|22407626(+)	exon	0.218215	0.310647	0.280963	0	0	0	0.269942	0	#NAME?	0.0160584	1	DOWN	ENSRNOG00000006340	Memo1	mediator of cell motility 1 [Source:RGD Symbol;Acc:1309929]	6:22362484-22409579	24.0175	23.6992	22.27	24.4747	22.3543	22.0075	23.3289	22.9455	-0.0239071	0.849771	1	-
circRNA.10131	-	6:27573046|27582987(-)	exon	0.581906	0.46597	0.632168	0	0	0.388044	0.560015	0.129348	-2.11421	0.0373725	1	DOWN	ENSRNOG00000010800	Hadhb	hydroxyacyl-CoA dehydrogenase/3-ketoacyl-CoA thiolase/enoyl-CoA hydratase (trifunctional protein), beta subunit [Source:RGD Symbol;Acc:620513]	6:27555412-27582995	53.3259	50.4044	53.3974	50.4221	47.7417	51.1503	52.3759	49.7714	-0.0735871	0.341039	0.92741	-
circRNA.1058	-	11:86824053|86831108(+)	exon	0.218215	0.232985	0.280963	0	0	0	0.244054	0	#NAME?	0.0295117	1	DOWN	ENSRNOG00000030245	Tango2	transport and golgi organization 2 homolog (Drosophila) [Source:RGD Symbol;Acc:1310348]	11:86797557-86840573	28.307	27.4408	30.1263	30.9178	31.5807	29.7798	28.6247	30.7594	0.10377	0.199588	0.814737	-
circRNA.10761	-	7:18533478|18535599(-)	exon	0.218215	0.388308	0.421445	0	0	0	0.342656	0	#NAME?	0.00337567	1	DOWN	ENSRNOG00000007921	Hnrnpm	heterogeneous nuclear ribonucleoprotein M [Source:RGD Symbol;Acc:620369]	7:18516512-18554227	38.0107	35.5576	36.1795	39.7244	38.2492	38.3164	36.5826	38.7633	0.083535	0.255249	0.866649	-
circRNA.11078	-	7:76229137|76229533(-)	exon	0.509168	0.388308	0.421445	0.223783	0	0	0.439641	0.0745942	-2.55919	0.0143487	1	DOWN	ENSRNOG00000042978	Ncald	neurocalcin delta [Source:RGD Symbol;Acc:1560287]	7:76199306-76488216	60.8236	61.3635	66.1357	15.4979	68.2437	67.9789	62.7742	50.5735	-0.311791	0.383887	0.955066	-
circRNA.11172	-	7:93434909|93436345(-)	intron	0.363691	0	0.561927	0	0	0	0.308539	0	#NAME?	0.0392391	1	DOWN	ENSRNOG00000043390	Samd12	sterile alpha motif domain containing 12 [Source:RGD Symbol;Acc:1561402]	7:92993330-93502591	24.7877	23.7154	24.7294	22.9549	23.704	25.4013	24.4108	24.0201	-0.0232818	0.796067	1	-
circRNA.11265	-	8:109044546|109216053(+)	exon	0	0	0	0.223783	0.178664	0.310435	0	0.237627	Inf	0.0485938	1	UP	ENSRNOG00000015389	Stag1	stromal antigen 1 [Source:RGD Symbol;Acc:1310744]	8:108958046-109342738	8.71786	8.85598	8.55057	9.26698	9.54623	9.43046	8.70814	9.41455	0.112529	0.131012	0.710809	-
circRNA.11617	-	8:52127636|52158205(+)	exon	1.74572	0	0	0	0	0	0.581906	0	#NAME?	0.024622	1	DOWN	ENSRNOG00000018778	Cadm1	cell adhesion molecule 1 [Source:RGD Symbol;Acc:1310999]	8:52127399-52189722	31.2535	29.3622	31.4708	28.7401	30.4088	26.4732	30.6955	28.5407	-0.105006	0.204757	0.821607	-
circRNA.11659	-	8:59035184|59053541(-)	exon	0	0	0	0.223783	0.267997	0.310435	0	0.267405	Inf	0.0255485	1	UP	ENSRNOG00000009170	Dmxl2	Dmx-like 2 [Source:RGD Symbol;Acc:1586163]	8:58932580-59077690	50.264	49.7797	49.9426	50.7978	51.8218	51.7051	49.9954	51.4416	0.0411382	0.471462	0.985627	-
circRNA.11664	-	8:59050282|59056386(-)	exon	0.581906	0.46597	0.632168	0.149188	0	0.232826	0.560015	0.127338	-2.1368	0.0112584	1	DOWN	ENSRNOG00000009170	Dmxl2	Dmx-like 2 [Source:RGD Symbol;Acc:1586163]	8:58932580-59077690	50.264	49.7797	49.9426	50.7978	51.8218	51.7051	49.9954	51.4416	0.0411382	0.471462	0.985627	-
circRNA.11696	-	8:60917720|60920949(-)	exon	0	0	0	0.298377	0.267997	0.155218	0	0.24053	Inf	0.0480678	1	UP	ENSRNOG00000042519	Peak1	pseudopodium-enriched atypical kinase 1 [Source:RGD Symbol;Acc:1312026]	8:60867819-61079526	13.1067	13.8791	13.4231	15.8721	13.7377	14.5437	13.4696	14.7178	0.127852	0.0974572	0.634628	-
circRNA.1222	-	12:37641425|37641929(+)	exon	0.363691	0.232985	0.140482	0	0	0	0.245719	0	#NAME?	0.035421	1	DOWN	ENSRNOG00000001064	Sbno1	strawberry notch homolog 1 (Drosophila) [Source:RGD Symbol;Acc:1310005]	12:37593874-37649036	36.3454	33.9383	33.1357	32.6989	34.0539	34.3677	34.4731	33.7069	-0.0324297	0.683448	1	-
circRNA.12386	-	9:53129625|53155776(+)	exon	0.727383	0.698955	0.632168	1.79026	1.96531	1.16413	0.686169	1.6399	1.25697	0.00755382	1	UP	ENSRNOG00000004076	Pms1	postmeiotic segregation increased 1 (S. cerevisiae) [Source:RGD Symbol;Acc:1359511]	9:53120656-53206516	8.03676	7.25173	6.77584	8.71117	8.12379	7.64404	7.35477	8.15966	0.149829	0.193884	0.809257	-
circRNA.12506	-	9:69940437|69942486(-)	exon	0	0	0	0.372971	0.178664	0.232826	0	0.261487	Inf	0.0311334	1	UP	ENSRNOG00000011849	Ndufs1	NADH dehydrogenase (ubiquinone) Fe-S protein 1 [Source:RGD Symbol;Acc:1359670]	9:69919867-69953182	125.551	126.142	132.769	115.049	121.693	121.912	128.154	119.551	-0.100247	0.155242	0.748213	-
circRNA.12574	-	9:8350080|8421978(+)	intron	0	0.543632	0.632168	0.895131	1.42931	1.31935	0.391933	1.2146	1.6318	0.0388917	1	UP	ENSRNOG00000048686	LOC100360856	hypothetical protein LOC100360856 [Source:RGD Symbol;Acc:2321302]	9:8349033-8442298	4.17701	5.36007	5.73571	5.88329	8.70592	7.37655	5.09093	7.32192	0.524292	0.00336773	0.107654	-
circRNA.1265	-	12:44761634|44762147(-)	exon	0.581906	0.93194	1.19409	0.223783	0.267997	0.465653	0.902647	0.319144	-1.49995	0.0125847	1	DOWN	ENSRNOG00000028630	Ksr2	kinase suppressor of ras 2 [Source:RGD Symbol;Acc:1562674]	12:44536293-44911147	12.9733	12.0748	12.2015	12.7177	11.8646	12.7271	12.4165	12.4364	0.00231411	0.956525	1	-
circRNA.12913	-	X:63177769|63182385(-)	exon	0.945598	0.93194	0.491686	3.35674	1.25065	1.31935	0.789741	1.97558	1.32282	0.0378545	1	UP	ENSRNOG00000005624	Zfx	zinc finger protein X-linked [Source:RGD Symbol;Acc:1562664]	X:63158976-63204530	5.20523	4.57158	5.25425	5.59164	5.21353	6.539	5.01035	5.78139	0.206505	0.038219	0.414148	-
circRNA.12939	-	X:68338536|68352920(-)	exon	0.218215	0.232985	0.421445	0	0	0	0.290882	0	#NAME?	0.0110099	1	DOWN	ENSRNOG00000026573	Ophn1	oligophrenin 1 [Source:RGD Symbol;Acc:1563435]	X:68189161-68563137	6.57009	6.12617	7.56088	6.83283	7.16715	6.92481	6.75238	6.97493	0.0467828	0.631255	1	-
circRNA.1325	-	12:9061581|9062262(+)	exon	0.509168	0.155323	0.140482	0	0	0	0.268324	0	#NAME?	0.0288228	1	DOWN	ENSRNOG00000000940	Flt1	FMS-related tyrosine kinase 1 [Source:RGD Symbol;Acc:2621]	12:9034308-9205905	20.203	22.4053	22.2008	24.3627	22.7334	20.024	21.603	22.3734	0.0505499	0.524433	0.985627	-
circRNA.1606	-	13:60462943|60484400(-)	exon	0	0	0.351204	0.895131	1.07199	0.388044	0.117068	0.785054	2.74544	0.0122676	1	UP	ENSRNOG00000003258	Cdc73	cell division cycle 73 [Source:RGD Symbol;Acc:1311766]	13:60403771-60496511	17.6063	15.7301	16.3497	16.7167	17.7226	16.621	16.5621	17.0201	0.0393557	0.676164	1	-
circRNA.1875	-	14:104942288|104946182(-)	exon	0.218215	0.155323	0.351204	0	0	0	0.241581	0	#NAME?	0.0356674	1	DOWN	ENSRNOG00000005411	Aftph	aftiphilin [Source:RGD Symbol;Acc:1311920]	14:104922282-104960141	38.8592	38.0178	39.8506	41.9699	37.6941	37.1336	38.9092	38.9325	0.000863995	0.960207	1	-
circRNA.1912	-	14:108013275|108020828(+)	exon	0.145477	0.155323	0	0.671348	0.625325	0.543262	0.100267	0.613312	2.61278	0.00314703	1	UP	ENSRNOG00000009935	Xpo1	exportin 1 [Source:RGD Symbol;Acc:620517]	14:108007724-108049660	34.3861	34.2781	34.7031	34.8588	35.3987	36.2331	34.4558	35.4969	0.0429463	0.496706	0.985627	-
circRNA.2144	-	14:4178531|4198845(+)	exon	0	0	0	0.52216	0.357329	0.155218	0	0.344902	Inf	0.00786814	1	UP	ENSRNOG00000002112	Zfp644	zinc finger protein 644 [Source:RGD Symbol;Acc:1306805]	14:4125380-4200328	23.9887	22.8907	23.8811	25.4579	24.1382	25.1402	23.5868	24.9121	0.0788688	0.236994	0.860812	-
circRNA.2512	-	15:19620758|19636174(-)	exon	0	0.232985	0	0.447565	0.267997	0.698479	0.0776617	0.471347	2.60151	0.0258726	1	UP	ENSRNOG00000006462	Ero1l	ERO1-like (S. cerevisiae) [Source:RGD Symbol;Acc:621713]	15:19619973-19655381	54.498	53.7115	54.3166	58.4765	54.2346	58.2622	54.1754	56.9911	0.0730999	0.284518	0.888216	-
circRNA.2534	-	15:25320488|25335135(+)	exon	0.43643	0.155323	0.351204	0	0	0	0.314319	0	#NAME?	0.00744633	1	DOWN	ENSRNOG00000013353	Tmem260	transmembrane protein 260 [Source:RGD Symbol;Acc:1562018]	15:25294425-25361623	11.3825	12.5317	11.9312	13.5181	12.2322	13.0602	11.9485	12.9368	0.114658	0.158234	0.754008	-
circRNA.3501	-	17:66241696|66243020(-)	exon	0	0	0	0.298377	0.178664	0.310435	0	0.262492	Inf	0.0289029	1	UP	ENSRNOG00000017593	Mtr	5-methyltetrahydrofolate-homocysteine methyltransferase [Source:RGD Symbol;Acc:621283]	17:66210461-66295014	8.9192	7.83726	8.48426	8.57418	8.08029	8.48652	8.41358	8.38033	-0.00571157	0.988199	1	-
circRNA.3561	-	17:76245627|76265943(-)	exon	3.05501	0	0	0	0	0	1.01834	0	#NAME?	0.00870319	1	DOWN	ENSRNOG00000023593	Upf2	UPF2 regulator of nonsense transcripts homolog (yeast) [Source:RGD Symbol;Acc:1309178]	17:76184928-76281660	23.4462	20.8292	21.3381	24.8288	24.9127	23.4885	21.8712	24.41	0.158439	0.0444312	0.443665	-
circRNA.3678	-	17:9875749|9929565(-)	exon	0.363691	0.155323	0.210723	0	0	0	0.243246	0	#NAME?	0.0355026	1	DOWN	ENSRNOG00000016680	Nsd1	nuclear receptor binding SET domain protein 1 [Source:RGD Symbol;Acc:1307748]	17:9844133-9952898	46.1819	44.9294	44.591	45.0424	43.029	44.8061	45.2341	44.2925	-0.0303487	0.678879	1	-
circRNA.376	-	10:61882916|61885796(+)	exon	0	0	0	0.372971	0.535993	0.310435	0	0.406466	Inf	0.00122738	1	UP	ENSRNOG00000003041	Smg6	SMG6 nonsense mediated mRNA decay factor [Source:RGD Symbol;Acc:1595918]	10:61772135-62007354	4.59794	5.1169	4.79883	4.86634	5.20422	4.99535	4.83789	5.02197	0.0538744	0.565502	0.997677	-
circRNA.3762	-	18:2005294|2032491(+)	exon	0.43643	0.46597	0.140482	0	0	0	0.347627	0	#NAME?	0.00512033	1	DOWN	ENSRNOG00000013281	Mib1	mindbomb E3 ubiquitin protein ligase 1 [Source:RGD Symbol;Acc:1307195]	18:1970914-2094920	57.3325	60.3067	60.1556	59.6205	58.4302	59.5449	59.2649	59.1985	-0.00161751	0.979509	1	-
circRNA.42	-	10:110680099|110690679(+)	exon	0	0	0	0.596754	0.178664	0.232826	0	0.336082	Inf	0.00938927	1	UP	ENSRNOG00000036658	Tbcd	tubulin folding cofactor D [Source:RGD Symbol;Acc:2320148]	10:110643759-110800493	23.6697	25.9616	24.9526	25.8899	24.6918	27.3742	24.8613	25.9853	0.0637932	0.389919	0.956863	-
circRNA.466	-	10:70163790|70172741(-)	exon	0	0	0	0	0	1.39696	0	0.465653	Inf	0.0400115	1	UP	ENSRNOG00000007596	Rffl	ring finger and FYVE-like domain containing E3 ubiquitin protein ligase [Source:RGD Symbol;Acc:727916]	10:70157621-70220582	12.8896	11.3059	9.75202	9.49698	13.7941	10.798	11.3158	11.363	0.00600399	0.948221	1	-
circRNA.467	-	10:70167431|70172741(-)	exon	0	0	0	0	0	4.19088	0	1.39696	Inf	0.00507073	1	UP	ENSRNOG00000007596	Rffl	ring finger and FYVE-like domain containing E3 ubiquitin protein ligase [Source:RGD Symbol;Acc:727916]	10:70157621-70220582	12.8896	11.3059	9.75202	9.49698	13.7941	10.798	11.3158	11.363	0.00600399	0.948221	1	-
circRNA.4677	-	1:144154619|144177718(+)	exon	0.218215	0	0	0.596754	0.178664	0.543262	0.0727383	0.43956	2.59527	0.0390979	1	UP	ENSRNOG00000019776	Sh3gl3	SH3-domain GRB2-like 3 [Source:RGD Symbol;Acc:620578]	1:144069638-144200397	21.1247	18.0718	18.0022	14.1814	18.0005	16.9373	19.0662	16.3731	-0.219694	0.059431	0.51234	-
circRNA.4760	-	1:163203870|163216364(-)	exon	0.363691	0.46597	0.561927	1.41729	1.16132	0.931306	0.463863	1.16997	1.3347	0.00961624	1	UP	ENSRNOG00000036866	Acer3	alkaline ceramidase 3 [Source:RGD Symbol;Acc:1561254]	1:163160979-163263606	16.6519	15.625	15.8679	14.2464	14.1756	14.747	16.0483	14.3897	-0.157384	0.0574496	0.502265	-
circRNA.5153	-	1:221065774|221067559(-)	exon	0.145477	0.388308	0.351204	0	0	0	0.294996	0	#NAME?	0.0119769	1	DOWN	ENSRNOG00000056038	Ehbp1l1	EH domain binding protein 1-like 1 [Source:MGI Symbol;Acc:MGI:3612340]	1:221062147-221084129	5.44754	6.30253	6.76915	7.13269	5.38299	5.4168	6.17308	5.97749	-0.0464488	0.746892	1	-
circRNA.5177	-	1:225019523|225021984(+)	exon	0.290953	0.232985	0.280963	0	0	0	0.268301	0	#NAME?	0.0157534	1	DOWN	ENSRNOG00000019507	Hnrnpul2	heterogeneous nuclear ribonucleoprotein U-like 2 [Source:RGD Symbol;Acc:1562784]	1:225015616-225027710	61.898	60.0926	56.3729	58.5847	55.5525	57.6194	59.4545	57.2522	-0.0544554	0.481771	0.985627	-
circRNA.5213	-	1:235737499|235761819(-)	exon	0	0	0	0.298377	0.267997	0.155218	0	0.24053	Inf	0.0482802	1	UP	ENSRNOG00000025539	Vps13a	vacuolar protein sorting 13 homolog A (S. cerevisiae) [Source:RGD Symbol;Acc:1311340]	1:235653121-235813030	26.2918	27.8292	29.0612	27.9669	29.481	28.2798	27.7274	28.5759	0.0434862	0.506646	0.985627	-
circRNA.544	-	10:74338952|74360926(-)	exon	0.363691	0.155323	0	0.745942	0.714657	0.543262	0.173005	0.667954	1.94894	0.0246721	1	UP	ENSRNOG00000060561	Gdpd1	glycerophosphodiester phosphodiesterase domain containing 1 [Source:RGD Symbol;Acc:1311813]	10:74334975-74376270	25.581	25.9537	24.3067	26.6616	26.8597	25.1979	25.2805	26.2397	0.0537299	0.52811	0.985627	-
circRNA.5476	-	1:278679022|278749829(+)	exon	3.34596	2.17453	3.4418	5.2216	5.62793	7.37284	2.98743	6.07412	1.02377	0.0018631	1	UP	ENSRNOG00000017406	Atrnl1	attractin like 1 [Source:RGD Symbol;Acc:1563485]	1:278557792-278815473	35.5019	32.9494	36.3023	38.8129	35.3669	39.5973	34.9179	37.9257	0.119209	0.100176	0.641496	-
circRNA.551	-	10:74467237|74490078(+)	exon	0	0	0	0.149188	0.267997	0.465653	0	0.294279	Inf	0.0195314	1	UP	ENSRNOG00000006248	Trim37	tripartite motif-containing 37 [Source:RGD Symbol;Acc:1308349]	10:74436208-74568493	67.3112	66.4742	61.8646	66.9355	64.5546	67.3686	65.2167	66.2862	0.0234677	0.701105	1	-
circRNA.5749	-	1:91873487|91883284(+)	exon	0.363691	0	0	0.52216	0.625325	0.543262	0.12123	0.563582	2.21687	0.0445993	1	UP	ENSRNOG00000052814	Ankrd27	ankyrin repeat domain 27 (VPS9 domain) [Source:RGD Symbol;Acc:1307106]	1:91857057-91958763	5.87679	5.57266	5.95637	5.70945	5.39413	5.80053	5.80194	5.6347	-0.0421954	0.70014	1	-
circRNA.59	-	10:13931236|13935484(+)	exon	0.727383	0.232985	0.491686	0.149188	0.178664	0	0.484018	0.109284	-2.14697	0.0259744	1	DOWN	ENSRNOG00000010771	Pkd1	polycystic kidney disease 1 [Source:RGD Symbol;Acc:3333]	10:13915214-13962008	25.9806	25.4991	27.9183	28.4142	28.5636	27.5718	26.466	28.1832	0.0906942	0.164057	0.761474	-
circRNA.5935	-	20:46008693|46023669(-)	exon	0	0	0	0.52216	0.625325	0	0	0.382495	Inf	0.0186553	1	UP	ENSRNOG00000000312	Fig4	FIG4 phosphoinositide 5-phosphatase [Source:RGD Symbol;Acc:1311375]	20:45922806-46044738	19.3854	17.5241	19.4478	17.7985	19.8665	17.7314	18.7858	18.4655	-0.0248126	0.804885	1	-
circRNA.5999	-	20:8006289|8019015(-)	exon	0	0	0	0.52216	0.267997	0.388044	0	0.392733	Inf	0.00163945	1	UP	ENSRNOG00000022523	Fkbp5	FK506 binding protein 5 [Source:RGD Symbol;Acc:1309155]	20:7976713-8019020	7.03129	6.53606	6.86781	6.80774	5.97601	6.22862	6.81172	6.33746	-0.104114	0.381625	0.954599	-
circRNA.6041	-	2:113739689|113745181(+)	exon	0	0	0	0.52216	0.357329	0.155218	0	0.344902	Inf	0.00784705	1	UP	ENSRNOG00000028156	Pld1	phospholipase D1 [Source:RGD Symbol;Acc:3349]	2:113652348-113849403	8.82306	9.20765	9.86295	9.20488	9.66613	10.3209	9.29789	9.73065	0.0656327	0.415583	0.968164	-
circRNA.6054	-	2:116070154|116081913(+)	exon	0.363691	0.155323	0.561927	0	0.178664	0	0.360314	0.0595548	-2.59697	0.0454222	1	DOWN	ENSRNOG00000009491	Phc3	polyhomeotic homolog 3 (Drosophila) [Source:RGD Symbol;Acc:1307998]	2:116028781-116096045	17.2296	17.7043	16.1507	17.6455	16.4898	18.7188	17.0282	17.6181	0.0491278	0.525539	0.985627	-
circRNA.6098	-	2:123576589|123600232(+)	exon	0	0	0	0.149188	0.267997	0.310435	0	0.24254	Inf	0.0478409	1	UP	ENSRNOG00000038436	RGD1307100	similar to RIKEN cDNA D630029K19 [Source:RGD Symbol;Acc:1307100]	2:123555673-123766676	46.2305	47.3875	47.0284	48.6056	46.3194	46.4664	46.8822	47.1305	0.00762212	0.860381	1	-
circRNA.6575	-	2:219920037|219959360(-)	exon	0	0	0	0.298377	0.178664	0.388044	0	0.288362	Inf	0.017072	1	UP	ENSRNOG00000016878	Lppr5	lipid phosphate phosphatase-related protein type 5 [Source:RGD Symbol;Acc:1309567]	2:219896765-220101791	10.8804	10.5313	10.0165	10.8892	10.4119	10.4448	10.4761	10.582	0.0145119	0.866095	1	-
circRNA.6796	-	2:28986099|29006321(-)	exon	0	0	0	0.223783	0.357329	0.232826	0	0.271313	Inf	0.0257508	1	UP	ENSRNOG00000015334	Fcho2	FCH domain only 2 [Source:RGD Symbol;Acc:1565396]	2:28926107-29029176	14.0507	14.3477	15.4044	14.4233	15.8969	15.5252	14.6009	15.2818	0.0657589	0.410023	0.964093	-
circRNA.6875	-	2:35754082|35766354(-)	exon	0	0	0	0.372971	0.357329	0.232826	0	0.321042	Inf	0.00797521	1	UP	ENSRNOG00000043329	Rnf180	ring finger protein 180 [Source:RGD Symbol;Acc:1595064]	2:35718889-35870578	9.2758	10.337	9.5981	10.0327	8.83434	9.91361	9.73695	9.59354	-0.021407	0.9091	1	-
circRNA.6954	-	2:50399455|50429941(+)	exon	0.145477	0.310647	0.491686	0	0	0	0.315936	0	#NAME?	0.00856407	1	DOWN	ENSRNOG00000055382	Hcn1	hyperpolarization-activated cyclic nucleotide-gated potassium channel 1 [Source:RGD Symbol;Acc:620688]	2:50099576-50499799	8.42382	9.21135	9.30262	7.01735	7.71772	7.88647	8.97926	7.54051	-0.251935	0.0289089	0.367655	-
circRNA.7039	-	2:69589316|69591756(+)	exon	0.145477	0.388308	0.561927	0	0.178664	0	0.365237	0.0595548	-2.61654	0.0368206	1	DOWN	ENSRNOG00000009771	Cdh10	cadherin 10 [Source:RGD Symbol;Acc:619741]	2:69415057-69637524	15.4954	14.8571	16.5089	14.2668	14.8976	13.722	15.6204	14.2955	-0.127875	0.136796	0.716062	-
circRNA.7132	-	3:104980955|104984877(+)	exon	0	0	0	0	0	3.02674	0	1.00891	Inf	0.00917808	1	UP	ENSRNOG00000031760	Fmn1	formin 1 [Source:MGI Symbol;Acc:MGI:101815]	3:104816987-105086436	9.21551	9.73169	9.65085	10.9882	12.6891	11.8676	9.53268	11.8483	0.313728	0.000302364	0.0199835	-
circRNA.763	-	11:20634697|20650229(+)	exon	0.218215	0.543632	0.77265	0.223783	0.178664	0	0.511499	0.134149	-1.93089	0.0367613	1	DOWN	ENSRNOG00000002126	Ncam2	neural cell adhesion molecule 2 [Source:RGD Symbol;Acc:1303131]	11:20471764-20705063	46.5386	41.6435	43.7102	41.9726	41.8768	41.7806	43.9641	41.8766	-0.0701807	0.343833	0.930544	-
circRNA.7668	-	3:3399474|3414759(-)	exon	0.145477	0	0	0.52216	0.446661	0.388044	0.0484922	0.452288	3.22142	0.0061008	1	UP	ENSRNOG00000017883	Camsap1	calmodulin regulated spectrin-associated protein 1 [Source:RGD Symbol;Acc:1565022]	3:3373971-3434027	21.0533	23.3861	23.3003	21.9946	21.8497	21.2047	22.5799	21.683	-0.0584752	0.446224	0.985627	-
circRNA.7701	-	3:45086410|45133351(-)	exon	0	0.155323	0	0.447565	0.446661	0.543262	0.0517745	0.479163	3.2102	0.00381763	1	UP	ENSRNOG00000057740	Ccdc148	Ccdc148 protein; Protein Ccdc148 [Source:UniProtKB/TrEMBL;Acc:B2RZ45]	3:44892219-45210474	4.18647	3.63535	3.53135	4.78557	5.15718	4.67279	3.78439	4.87184	0.364407	0.0100242	0.205003	-
circRNA.8295	-	4:177416623|177436364(+)	exon	0	0.155323	0	0.447565	0.446661	0.388044	0.0517745	0.427423	3.04535	0.00997831	1	UP	ENSRNOG00000014856	Etnk1	ethanolamine kinase 1 [Source:RGD Symbol;Acc:1308204]	4:177402904-177447028	85.8994	84.8549	84.229	89.2011	89.7186	81.0384	84.9944	86.6527	0.0278771	0.645574	1	-
circRNA.839	-	11:34879058|34940932(+)	exon	0	0	0	0.52216	0.357329	0.310435	0	0.396641	Inf	0.00139656	1	UP	ENSRNOG00000001662	Dyrk1a	dual-specificity tyrosine-(Y)-phosphorylation regulated kinase 1A [Source:RGD Symbol;Acc:2528]	11:34865532-34956536	47.202	48.287	50.9995	50.6615	52.474	52.2463	48.8295	51.7939	0.0850298	0.212997	0.831631	-
circRNA.8439	-	4:31055983|31066896(+)	exon	0	0	0	0.372971	0.267997	0.155218	0	0.265395	Inf	0.030672	1	UP	ENSRNOG00000009700	Dync1i1	dynein cytoplasmic 1 intermediate chain 1 [Source:RGD Symbol;Acc:2512]	4:30807879-31121090	65.1193	65.7887	64.8864	65.6522	71.4771	63.3042	65.2648	66.8111	0.0337841	0.614827	1	-
circRNA.8601	-	4:632256|670536(+)	exon	0.145477	0.232985	0.351204	0	0	0	0.243222	0	#NAME?	0.0352391	1	DOWN	ENSRNOG00000006718	Rbm33	RNA binding motif protein 33 [Source:RGD Symbol;Acc:1310651]	4:594882-695383	13.6579	13.4943	13.5789	14.3191	13.8266	13.6652	13.577	13.937	0.03775	0.620294	1	-
circRNA.9004	-	5:128678699|128681202(+)	exon	1.30929	0.776617	1.26434	0.596754	0	0.465653	1.11675	0.354136	-1.65693	0.0204421	1	DOWN	ENSRNOG00000007111	Nrd1	nardilysin 1 [Source:RGD Symbol;Acc:3210]	5:128629942-128694060	36.0465	35.3112	34.8009	38.4056	34.6672	36.8779	35.3862	36.6503	0.0506374	0.448207	0.985627	-
circRNA.9282	-	5:16385268|16409710(-)	intron	0	0.621293	0.280963	0	0	0	0.300752	0	#NAME?	0.0448644	1	DOWN	ENSRNOG00000008872	Tmem68	transmembrane protein 68 [Source:RGD Symbol;Acc:1309006]	5:16382538-16413307	12.6448	12.1238	14.0107	13.1085	12.8467	14.0032	12.9264	13.3194	0.0432118	0.648984	1	-
circRNA.9658	-	5:90818736|90880617(+)	exon	5.23716	0	0	0	0	0	1.74572	0	#NAME?	0.00363599	1	DOWN	ENSRNOG00000006644	Kdm4c	lysine (K)-specific demethylase 4C [Source:RGD Symbol;Acc:1307528]	5:90818736-91065388	12.0495	12.5102	11.5618	13.2089	12.5404	11.5879	12.0405	12.4457	0.0477537	0.555499	0.996632	-
