# Supplementary material for: LncRNAs down-regulate Myh1, Casr, and Mis18a expression in the Substantia Nigra of aged male rats
Source: Aging (Albany NY). 2019 Oct 2;11(19):8313–28. doi: 10.18632/aging.102321 (PMC6814601; doi:10.18632/aging.102321)
Supplement: Supplementary Table 16 [file aging-11-102321-s001.xlsx]

## Sheet: Table 16
levels	GO_id	Term	GO_namespace	gene_num	gene_list
2	GO:0040011	locomotion	biological_process	4	ENSRNOG00000042519,ENSRNOG00000028156,ENSRNOG00000000940,ENSRNOG00000007596,
2	GO:0009987	cellular process	biological_process	43	ENSRNOG00000015334,ENSRNOG00000017593,ENSRNOG00000003258,ENSRNOG00000001064,ENSRNOG00000036658,ENSRNOG00000006644,ENSRNOG00000025539,ENSRNOG00000028630,ENSRNOG00000008145,ENSRNOG00000013884,ENSRNOG00000006340,ENSRNOG00000016878,ENSRNOG00000042519,ENSRNOG00000022523,ENSRNOG00000007596,ENSRNOG00000000940,ENSRNOG00000042978,ENSRNOG00000009935,ENSRNOG00000055382,ENSRNOG00000017883,ENSRNOG00000031760,…
2	GO:0016020	membrane	cellular_component	35	ENSRNOG00000014856,ENSRNOG00000018778,ENSRNOG00000000312,ENSRNOG00000013353,ENSRNOG00000043329,ENSRNOG00000002126,ENSRNOG00000036866,ENSRNOG00000038436,ENSRNOG00000007921,ENSRNOG00000010800,ENSRNOG00000052814,ENSRNOG00000005411,ENSRNOG00000006462,ENSRNOG00000008872,ENSRNOG00000011849,ENSRNOG00000056038,ENSRNOG00000009771,ENSRNOG00000028156,ENSRNOG00000010771,ENSRNOG00000017406,ENSRNOG00000015334,…
2	GO:0009055	electron carrier activity	molecular_function	1	ENSRNOG00000011849,
2	GO:0023052	signaling	biological_process	15	ENSRNOG00000006462,ENSRNOG00000003258,ENSRNOG00000016878,ENSRNOG00000013281,ENSRNOG00000007596,ENSRNOG00000000940,ENSRNOG00000042978,ENSRNOG00000001662,ENSRNOG00000010771,ENSRNOG00000017406,ENSRNOG00000028156,ENSRNOG00000008145,ENSRNOG00000028630,ENSRNOG00000026573,ENSRNOG00000013884,
2	GO:0051704	multi-organism process	biological_process	7	ENSRNOG00000028156,ENSRNOG00000003258,ENSRNOG00000010771,ENSRNOG00000009935,ENSRNOG00000005624,ENSRNOG00000007921,ENSRNOG00000008145,
2	GO:0099080	supramolecular complex	cellular_component	3	ENSRNOG00000036658,ENSRNOG00000031760,ENSRNOG00000017883,
2	GO:0005198	structural molecule activity	molecular_function	1	ENSRNOG00000028630,
2	GO:0065007	biological regulation	biological_process	36	ENSRNOG00000055382,ENSRNOG00000009935,ENSRNOG00000042978,ENSRNOG00000016680,ENSRNOG00000015389,ENSRNOG00000003041,ENSRNOG00000017883,ENSRNOG00000031760,ENSRNOG00000026573,ENSRNOG00000016878,ENSRNOG00000006340,ENSRNOG00000000940,ENSRNOG00000007596,ENSRNOG00000006644,ENSRNOG00000025539,ENSRNOG00000036658,ENSRNOG00000028630,ENSRNOG00000008145,ENSRNOG00000013884,ENSRNOG00000001064,ENSRNOG00000003258,…
2	GO:0098743	cell aggregation	biological_process	1	ENSRNOG00000010771,
2	GO:0048518	positive regulation of biological process	biological_process	21	ENSRNOG00000036658,ENSRNOG00000001662,ENSRNOG00000008145,ENSRNOG00000028630,ENSRNOG00000007921,ENSRNOG00000006248,ENSRNOG00000013884,ENSRNOG00000036866,ENSRNOG00000003258,ENSRNOG00000018778,ENSRNOG00000000312,ENSRNOG00000043329,ENSRNOG00000028156,ENSRNOG00000010771,ENSRNOG00000015389,ENSRNOG00000016680,ENSRNOG00000031760,ENSRNOG00000026573,ENSRNOG00000052814,ENSRNOG00000000940,ENSRNOG00000013281,
2	GO:0043226	organelle	cellular_component	42	ENSRNOG00000028156,ENSRNOG00000023593,ENSRNOG00000010771,ENSRNOG00000005624,ENSRNOG00000013281,ENSRNOG00000005411,ENSRNOG00000052814,ENSRNOG00000011849,ENSRNOG00000006462,ENSRNOG00000007111,ENSRNOG00000006248,ENSRNOG00000007921,ENSRNOG00000010800,ENSRNOG00000009700,ENSRNOG00000001662,ENSRNOG00000043329,ENSRNOG00000018778,ENSRNOG00000014856,ENSRNOG00000000312,ENSRNOG00000036866,ENSRNOG00000009170,…
2	GO:0051179	localization	biological_process	17	ENSRNOG00000015334,ENSRNOG00000018778,ENSRNOG00000025539,ENSRNOG00000019776,ENSRNOG00000007921,ENSRNOG00000005411,ENSRNOG00000042519,ENSRNOG00000052814,ENSRNOG00000006462,ENSRNOG00000000940,ENSRNOG00000007596,ENSRNOG00000013281,ENSRNOG00000055382,ENSRNOG00000028156,ENSRNOG00000010771,ENSRNOG00000009935,ENSRNOG00000026573,
2	GO:0005576	extracellular region	cellular_component	8	ENSRNOG00000009170,ENSRNOG00000022523,ENSRNOG00000018778,ENSRNOG00000010771,ENSRNOG00000042978,ENSRNOG00000019776,ENSRNOG00000010800,ENSRNOG00000007921,
2	GO:0032501	multicellular organismal process	biological_process	20	ENSRNOG00000013281,ENSRNOG00000005624,ENSRNOG00000000940,ENSRNOG00000006462,ENSRNOG00000052814,ENSRNOG00000017883,ENSRNOG00000026573,ENSRNOG00000031760,ENSRNOG00000042978,ENSRNOG00000010771,ENSRNOG00000023593,ENSRNOG00000055382,ENSRNOG00000000312,ENSRNOG00000018778,ENSRNOG00000043329,ENSRNOG00000017593,ENSRNOG00000003258,ENSRNOG00000008145,ENSRNOG00000013884,ENSRNOG00000006644,
2	GO:0060089	molecular transducer activity	molecular_function	2	ENSRNOG00000055382,ENSRNOG00000000940,
2	GO:0003824	catalytic activity	molecular_function	24	ENSRNOG00000016680,ENSRNOG00000003041,ENSRNOG00000028156,ENSRNOG00000000940,ENSRNOG00000013281,ENSRNOG00000022523,ENSRNOG00000007596,ENSRNOG00000016878,ENSRNOG00000060561,ENSRNOG00000042519,ENSRNOG00000006462,ENSRNOG00000011849,ENSRNOG00000008872,ENSRNOG00000028630,ENSRNOG00000008145,ENSRNOG00000007111,ENSRNOG00000006248,ENSRNOG00000010800,ENSRNOG00000001662,ENSRNOG00000000312,ENSRNOG00000014856,…
2	GO:0032991	macromolecular complex	cellular_component	19	ENSRNOG00000006248,ENSRNOG00000008145,ENSRNOG00000007921,ENSRNOG00000010800,ENSRNOG00000006644,ENSRNOG00000009700,ENSRNOG00000001662,ENSRNOG00000003258,ENSRNOG00000003041,ENSRNOG00000015389,ENSRNOG00000023593,ENSRNOG00000010771,ENSRNOG00000009935,ENSRNOG00000000940,ENSRNOG00000007596,ENSRNOG00000005411,ENSRNOG00000009491,ENSRNOG00000054294,ENSRNOG00000011849,
2	GO:0032502	developmental process	biological_process	18	ENSRNOG00000017593,ENSRNOG00000003258,ENSRNOG00000018778,ENSRNOG00000000312,ENSRNOG00000006644,ENSRNOG00000013884,ENSRNOG00000042519,ENSRNOG00000052814,ENSRNOG00000006462,ENSRNOG00000000940,ENSRNOG00000005624,ENSRNOG00000013281,ENSRNOG00000055382,ENSRNOG00000023593,ENSRNOG00000010771,ENSRNOG00000026573,ENSRNOG00000031760,ENSRNOG00000017883,
2	GO:0050789	regulation of biological process	biological_process	33	ENSRNOG00000010771,ENSRNOG00000017406,ENSRNOG00000028156,ENSRNOG00000013281,ENSRNOG00000005624,ENSRNOG00000006462,ENSRNOG00000052814,ENSRNOG00000006248,ENSRNOG00000007921,ENSRNOG00000001662,ENSRNOG00000043329,ENSRNOG00000000312,ENSRNOG00000018778,ENSRNOG00000036866,ENSRNOG00000026573,ENSRNOG00000031760,ENSRNOG00000017883,ENSRNOG00000003041,ENSRNOG00000015389,ENSRNOG00000016680,ENSRNOG00000042978,…
2	GO:0071840	cellular component organization or biogenesis	biological_process	21	ENSRNOG00000000312,ENSRNOG00000018778,ENSRNOG00000015334,ENSRNOG00000017593,ENSRNOG00000003258,ENSRNOG00000006248,ENSRNOG00000036658,ENSRNOG00000006644,ENSRNOG00000013281,ENSRNOG00000006462,ENSRNOG00000011849,ENSRNOG00000042519,ENSRNOG00000052814,ENSRNOG00000031760,ENSRNOG00000026573,ENSRNOG00000017883,ENSRNOG00000003041,ENSRNOG00000016680,ENSRNOG00000010771,ENSRNOG00000009935,ENSRNOG00000028156,
2	GO:0000988	transcription factor activity, protein binding	molecular_function	1	ENSRNOG00000016680,
2	GO:0050896	response to stimulus	biological_process	19	ENSRNOG00000001662,ENSRNOG00000013884,ENSRNOG00000008145,ENSRNOG00000028630,ENSRNOG00000007921,ENSRNOG00000017593,ENSRNOG00000003258,ENSRNOG00000010771,ENSRNOG00000017406,ENSRNOG00000042978,ENSRNOG00000009935,ENSRNOG00000028156,ENSRNOG00000026573,ENSRNOG00000006462,ENSRNOG00000052814,ENSRNOG00000016878,ENSRNOG00000007596,ENSRNOG00000013281,ENSRNOG00000000940,
2	GO:0044464	cell part	cellular_component	51	ENSRNOG00000028630,ENSRNOG00000008145,ENSRNOG00000036658,ENSRNOG00000019776,ENSRNOG00000025539,ENSRNOG00000006644,ENSRNOG00000017593,ENSRNOG00000003258,ENSRNOG00000015334,ENSRNOG00000017883,ENSRNOG00000031760,ENSRNOG00000026573,ENSRNOG00000016680,ENSRNOG00000015389,ENSRNOG00000003041,ENSRNOG00000042978,ENSRNOG00000009935,ENSRNOG00000019507,ENSRNOG00000055382,ENSRNOG00000022523,ENSRNOG00000007596,…
2	GO:0000003	reproduction	biological_process	2	ENSRNOG00000010771,ENSRNOG00000005624,
2	GO:0005623	cell	cellular_component	51	ENSRNOG00000010800,ENSRNOG00000009700,ENSRNOG00000001662,ENSRNOG00000006248,ENSRNOG00000007111,ENSRNOG00000007921,ENSRNOG00000002126,ENSRNOG00000009170,ENSRNOG00000036866,ENSRNOG00000043329,ENSRNOG00000018778,ENSRNOG00000014856,ENSRNOG00000000312,ENSRNOG00000028156,ENSRNOG00000023593,ENSRNOG00000010771,ENSRNOG00000009771,ENSRNOG00000005411,ENSRNOG00000052814,ENSRNOG00000006462,ENSRNOG00000011849,…
2	GO:0022414	reproductive process	biological_process	2	ENSRNOG00000005624,ENSRNOG00000010771,
2	GO:0044425	membrane part	cellular_component	24	ENSRNOG00000036658,ENSRNOG00000025539,ENSRNOG00000008145,ENSRNOG00000038436,ENSRNOG00000015334,ENSRNOG00000036866,ENSRNOG00000002126,ENSRNOG00000013353,ENSRNOG00000043329,ENSRNOG00000018778,ENSRNOG00000010771,ENSRNOG00000017406,ENSRNOG00000009935,ENSRNOG00000028156,ENSRNOG00000055382,ENSRNOG00000009771,ENSRNOG00000006462,ENSRNOG00000008872,ENSRNOG00000011849,ENSRNOG00000060561,ENSRNOG00000005411,…
2	GO:0005488	binding	molecular_function	49	ENSRNOG00000009170,ENSRNOG00000000312,ENSRNOG00000014856,ENSRNOG00000043329,ENSRNOG00000010800,ENSRNOG00000001662,ENSRNOG00000009700,ENSRNOG00000038436,ENSRNOG00000007921,ENSRNOG00000007111,ENSRNOG00000006248,ENSRNOG00000052814,ENSRNOG00000005411,ENSRNOG00000011849,ENSRNOG00000006462,ENSRNOG00000005624,ENSRNOG00000013281,ENSRNOG00000023593,ENSRNOG00000004076,ENSRNOG00000028156,ENSRNOG00000010771,…
2	GO:0031974	membrane-enclosed lumen	cellular_component	15	ENSRNOG00000014856,ENSRNOG00000022523,ENSRNOG00000005624,ENSRNOG00000003258,ENSRNOG00000054294,ENSRNOG00000011849,ENSRNOG00000005411,ENSRNOG00000042519,ENSRNOG00000006248,ENSRNOG00000007921,ENSRNOG00000003041,ENSRNOG00000016680,ENSRNOG00000001662,ENSRNOG00000009935,ENSRNOG00000010800,
2	GO:0009295	nucleoid	cellular_component	1	ENSRNOG00000010800,
2	GO:0030054	cell junction	cellular_component	5	ENSRNOG00000042519,ENSRNOG00000036658,ENSRNOG00000000940,ENSRNOG00000026573,ENSRNOG00000013884,
2	GO:0044422	organelle part	cellular_component	32	ENSRNOG00000031760,ENSRNOG00000017883,ENSRNOG00000003041,ENSRNOG00000016680,ENSRNOG00000015389,ENSRNOG00000009935,ENSRNOG00000007596,ENSRNOG00000022523,ENSRNOG00000009491,ENSRNOG00000054294,ENSRNOG00000042519,ENSRNOG00000036658,ENSRNOG00000019776,ENSRNOG00000006644,ENSRNOG00000003258,ENSRNOG00000028156,ENSRNOG00000023593,ENSRNOG00000013281,ENSRNOG00000005624,ENSRNOG00000011849,ENSRNOG00000006462,…
2	GO:0005215	transporter activity	molecular_function	3	ENSRNOG00000055382,ENSRNOG00000010771,ENSRNOG00000009935,
2	GO:0004871	signal transducer activity	molecular_function	1	ENSRNOG00000000940,
2	GO:0044421	extracellular region part	cellular_component	8	ENSRNOG00000022523,ENSRNOG00000018778,ENSRNOG00000009170,ENSRNOG00000007921,ENSRNOG00000010800,ENSRNOG00000010771,ENSRNOG00000019776,ENSRNOG00000042978,
2	GO:0044456	synapse part	cellular_component	4	ENSRNOG00000009170,ENSRNOG00000013281,ENSRNOG00000018778,ENSRNOG00000026573,
2	GO:0044699	single-organism process	biological_process	39	ENSRNOG00000006248,ENSRNOG00000007921,ENSRNOG00000001662,ENSRNOG00000009700,ENSRNOG00000010800,ENSRNOG00000043329,ENSRNOG00000000312,ENSRNOG00000018778,ENSRNOG00000036866,ENSRNOG00000009771,ENSRNOG00000010771,ENSRNOG00000017406,ENSRNOG00000028156,ENSRNOG00000023593,ENSRNOG00000013281,ENSRNOG00000005624,ENSRNOG00000011849,ENSRNOG00000006462,ENSRNOG00000052814,ENSRNOG00000013884,ENSRNOG00000028630,…
2	GO:0048519	negative regulation of biological process	biological_process	15	ENSRNOG00000000312,ENSRNOG00000013281,ENSRNOG00000007596,ENSRNOG00000006462,ENSRNOG00000003258,ENSRNOG00000052814,ENSRNOG00000008145,ENSRNOG00000026573,ENSRNOG00000006248,ENSRNOG00000003041,ENSRNOG00000009935,ENSRNOG00000036658,ENSRNOG00000001662,ENSRNOG00000010771,ENSRNOG00000006644,
2	GO:0007610	behavior	biological_process	3	ENSRNOG00000005624,ENSRNOG00000000312,ENSRNOG00000043329,
2	GO:0040007	growth	biological_process	3	ENSRNOG00000018778,ENSRNOG00000031760,ENSRNOG00000005624,
2	GO:0022610	biological adhesion	biological_process	6	ENSRNOG00000009771,ENSRNOG00000031760,ENSRNOG00000018778,ENSRNOG00000010771,ENSRNOG00000042519,ENSRNOG00000002126,
2	GO:0048511	rhythmic process	biological_process	2	ENSRNOG00000005624,ENSRNOG00000001662,
2	GO:0001071	nucleic acid binding transcription factor activity	molecular_function	2	ENSRNOG00000015389,ENSRNOG00000005624,
2	GO:0008152	metabolic process	biological_process	37	ENSRNOG00000031760,ENSRNOG00000026573,ENSRNOG00000016680,ENSRNOG00000015389,ENSRNOG00000003041,ENSRNOG00000009935,ENSRNOG00000022523,ENSRNOG00000007596,ENSRNOG00000000940,ENSRNOG00000016878,ENSRNOG00000042519,ENSRNOG00000060561,ENSRNOG00000008145,ENSRNOG00000028630,ENSRNOG00000013884,ENSRNOG00000036658,ENSRNOG00000006644,ENSRNOG00000017593,ENSRNOG00000003258,ENSRNOG00000001064,ENSRNOG00000010771,…
2	GO:0098772	molecular function regulator	molecular_function	4	ENSRNOG00000036658,ENSRNOG00000052814,ENSRNOG00000026573,ENSRNOG00000013884,
2	GO:0045202	synapse	cellular_component	4	ENSRNOG00000009170,ENSRNOG00000026573,ENSRNOG00000018778,ENSRNOG00000013281,
2	GO:0002376	immune system process	biological_process	3	ENSRNOG00000000940,ENSRNOG00000008145,ENSRNOG00000003258,
