# Supplementary material for: LncRNAs down-regulate Myh1, Casr, and Mis18a expression in the Substantia Nigra of aged male rats
Source: Aging (Albany NY). 2019 Oct 2;11(19):8313–28. doi: 10.18632/aging.102321 (PMC6814601; doi:10.18632/aging.102321)
Supplement: Supplementary Table 17 [file aging-11-102321-s010.xlsx]

## Sheet: Table 17
GO_ID	GO_term	TYPE	target_gene_in_this_GO	all_target_gene_in_all_GO	all_gene_in_this_GO	all_gene_in_all_GO	gene_list	rich_factor	Pvalue	Qvalue
GO:0032886	regulation of microtubule-based process	biological_process	5	63	146	19765	ENSRNOG00000010771(Pkd1),ENSRNOG00000036658(Tbcd),ENSRNOG00000006340(Memo1),ENSRNOG00000009935(Xpo1),ENSRNOG00000006248(Trim37),	10.7442	2.15e-05	0.031734
GO:0070507	regulation of microtubule cytoskeleton organization	biological_process	4	63	120	19765	ENSRNOG00000009935(Xpo1),ENSRNOG00000006248(Trim37),ENSRNOG00000036658(Tbcd),ENSRNOG00000010771(Pkd1),	10.4577	0.000110663	0.0818356
GO:0030133	transport vesicle	cellular_component	4	63	232	19765	ENSRNOG00000009170(Dmxl2),ENSRNOG00000005411(Aftph),ENSRNOG00000018778(Cadm1),ENSRNOG00000052814(Ankrd27),	5.40914	0.00210264	0.62196
GO:0015631	tubulin binding	molecular_function	4	63	244	19765	ENSRNOG00000031760(Fmn1),ENSRNOG00000042978(Ncald),ENSRNOG00000036658(Tbcd),ENSRNOG00000017883(Camsap1),	5.14312	0.00261434	0.552373
GO:0004842	ubiquitin-protein transferase activity	molecular_function	5	63	343	19765	ENSRNOG00000008145(Traf3),ENSRNOG00000043329(Rnf180),ENSRNOG00000006248(Trim37),ENSRNOG00000007596(Rffl),ENSRNOG00000013281(Mib1),	4.57333	0.00195978	0.724628
GO:0006644	phospholipid metabolic process	biological_process	4	63	277	19765	ENSRNOG00000028156(Pld1),ENSRNOG00000000312(Fig4),ENSRNOG00000016878(Lppr5),ENSRNOG00000000940(Flt1),	4.5304	0.00449244	0.511101
GO:0019787	ubiquitin-like protein transferase activity	molecular_function	5	63	359	19765	ENSRNOG00000006248(Trim37),ENSRNOG00000043329(Rnf180),ENSRNOG00000008145(Traf3),ENSRNOG00000013281(Mib1),ENSRNOG00000007596(Rffl),	4.3695	0.00246208	0.606903
GO:0051493	regulation of cytoskeleton organization	biological_process	5	63	366	19765	ENSRNOG00000036658(Tbcd),ENSRNOG00000006248(Trim37),ENSRNOG00000010771(Pkd1),ENSRNOG00000031760(Fmn1),ENSRNOG00000009935(Xpo1),	4.28593	0.00271043	0.501091
GO:0005543	phospholipid binding	molecular_function	4	63	306	19765	ENSRNOG00000028156(Pld1),ENSRNOG00000013884(Psd3),ENSRNOG00000026573(Ophn1),ENSRNOG00000015334(Fcho2),	4.10105	0.00682173	0.531018
GO:0042578	phosphoric ester hydrolase activity	molecular_function	4	63	322	19765	ENSRNOG00000060561(Gdpd1),ENSRNOG00000016878(Lppr5),ENSRNOG00000000312(Fig4),ENSRNOG00000028156(Pld1),	3.89727	0.0084251	0.519197
GO:0042176	regulation of protein catabolic process	biological_process	4	63	327	19765	ENSRNOG00000043329(Rnf180),ENSRNOG00000026573(Ophn1),ENSRNOG00000009935(Xpo1),ENSRNOG00000010771(Pkd1),	3.83768	0.00897688	0.510647
GO:0043547	positive regulation of GTPase activity	biological_process	4	63	347	19765	ENSRNOG00000013884(Psd3),ENSRNOG00000036658(Tbcd),ENSRNOG00000026573(Ophn1),ENSRNOG00000052814(Ankrd27),	3.61649	0.0114423	0.604398
GO:0006897	endocytosis	biological_process	5	63	439	19765	ENSRNOG00000028156(Pld1),ENSRNOG00000013281(Mib1),ENSRNOG00000015334(Fcho2),ENSRNOG00000026573(Ophn1),ENSRNOG00000019776(Sh3gl3),	3.57324	0.00658529	0.572921
GO:0060627	regulation of vesicle-mediated transport	biological_process	4	63	353	19765	ENSRNOG00000028156(Pld1),ENSRNOG00000013281(Mib1),ENSRNOG00000052814(Ankrd27),ENSRNOG00000026573(Ophn1),	3.55502	0.0122664	0.625585
GO:0016570	histone modification	biological_process	4	63	362	19765	ENSRNOG00000016680(Nsd1),ENSRNOG00000006644(Kdm4c),ENSRNOG00000006248(Trim37),ENSRNOG00000003258(Cdc73),	3.46663	0.0135793	0.669459
GO:0005768	endosome	cellular_component	6	63	544	19765	ENSRNOG00000007596(Rffl),ENSRNOG00000028156(Pld1),ENSRNOG00000009700(Dync1i1),ENSRNOG00000019776(Sh3gl3),ENSRNOG00000052814(Ankrd27),ENSRNOG00000000312(Fig4),	3.46026	0.00431892	0.580698
GO:0010498	proteasomal protein catabolic process	biological_process	4	63	364	19765	ENSRNOG00000010771(Pkd1),ENSRNOG00000007596(Rffl),ENSRNOG00000026573(Ophn1),ENSRNOG00000043329(Rnf180),	3.44758	0.0138839	0.662394
GO:0007017	microtubule-based process	biological_process	6	63	547	19765	ENSRNOG00000006340(Memo1),ENSRNOG00000010771(Pkd1),ENSRNOG00000006248(Trim37),ENSRNOG00000036658(Tbcd),ENSRNOG00000009700(Dync1i1),ENSRNOG00000009935(Xpo1),	3.44128	0.00445087	0.54857
GO:0016071	mRNA metabolic process	biological_process	4	63	376	19765	ENSRNOG00000007921(Hnrnpm),ENSRNOG00000001662(Dyrk1a),ENSRNOG00000003041(Smg6),ENSRNOG00000003258(Cdc73),	3.33755	0.015812	0.730812
GO:0015629	actin cytoskeleton	cellular_component	4	63	381	19765	ENSRNOG00000026573(Ophn1),ENSRNOG00000009491(Phc3),ENSRNOG00000031760(Fmn1),ENSRNOG00000042519(Peak1),	3.29375	0.0166676	0.725041
GO:0030424	axon	cellular_component	4	63	384	19765	ENSRNOG00000002126(Ncam2),ENSRNOG00000018778(Cadm1),ENSRNOG00000055382(Hcn1),ENSRNOG00000026573(Ophn1),	3.26802	0.0171961	0.726656
GO:0016567	protein ubiquitination	biological_process	6	63	579	19765	ENSRNOG00000013281(Mib1),ENSRNOG00000008145(Traf3),ENSRNOG00000043329(Rnf180),ENSRNOG00000003258(Cdc73),ENSRNOG00000007596(Rffl),ENSRNOG00000006248(Trim37),	3.25109	0.00606012	0.597528
GO:0000226	microtubule cytoskeleton organization	biological_process	4	63	389	19765	ENSRNOG00000010771(Pkd1),ENSRNOG00000009935(Xpo1),ENSRNOG00000036658(Tbcd),ENSRNOG00000006248(Trim37),	3.22602	0.0181023	0.743704
GO:0008092	cytoskeletal protein binding	molecular_function	7	63	693	19765	ENSRNOG00000026573(Ophn1),ENSRNOG00000042978(Ncald),ENSRNOG00000017883(Camsap1),ENSRNOG00000001662(Dyrk1a),ENSRNOG00000036658(Tbcd),ENSRNOG00000009700(Dync1i1),ENSRNOG00000031760(Fmn1),	3.16899	0.00417585	0.617607
GO:0043087	regulation of GTPase activity	biological_process	4	63	400	19765	ENSRNOG00000026573(Ophn1),ENSRNOG00000036658(Tbcd),ENSRNOG00000052814(Ankrd27),ENSRNOG00000013884(Psd3),	3.1373	0.0202109	0.747297
GO:0010564	regulation of cell cycle process	biological_process	4	63	409	19765	ENSRNOG00000006248(Trim37),ENSRNOG00000003258(Cdc73),ENSRNOG00000010771(Pkd1),ENSRNOG00000009935(Xpo1),	3.06827	0.0220566	0.776706
GO:0032446	protein modification by small protein conjugation	biological_process	6	63	617	19765	ENSRNOG00000007596(Rffl),ENSRNOG00000006248(Trim37),ENSRNOG00000013281(Mib1),ENSRNOG00000008145(Traf3),ENSRNOG00000043329(Rnf180),ENSRNOG00000003258(Cdc73),	3.05086	0.00850957	0.503426
GO:0008270	zinc ion binding	molecular_function	10	63	1036	19765	ENSRNOG00000007596(Rffl),ENSRNOG00000016680(Nsd1),ENSRNOG00000007111(Nrd1),ENSRNOG00000017593(Mtr),ENSRNOG00000009491(Phc3),ENSRNOG00000006248(Trim37),ENSRNOG00000006644(Kdm4c),ENSRNOG00000013281(Mib1),ENSRNOG00000008145(Traf3),ENSRNOG00000043329(Rnf180),	3.02828	0.0013264	0.653914
GO:0031410	cytoplasmic vesicle	cellular_component	8	63	838	19765	ENSRNOG00000015334(Fcho2),ENSRNOG00000052814(Ankrd27),ENSRNOG00000009170(Dmxl2),ENSRNOG00000007596(Rffl),ENSRNOG00000028156(Pld1),ENSRNOG00000005411(Aftph),ENSRNOG00000018778(Cadm1),ENSRNOG00000013281(Mib1),	2.99504	0.00366742	0.602679
GO:0016023	cytoplasmic, membrane-bounded vesicle	cellular_component	7	63	741	19765	ENSRNOG00000005411(Aftph),ENSRNOG00000018778(Cadm1),ENSRNOG00000052814(Ankrd27),ENSRNOG00000015334(Fcho2),ENSRNOG00000007596(Rffl),ENSRNOG00000028156(Pld1),ENSRNOG00000009170(Dmxl2),	2.96371	0.00623427	0.57628
GO:0008289	lipid binding	molecular_function	5	63	531	19765	ENSRNOG00000015334(Fcho2),ENSRNOG00000019776(Sh3gl3),ENSRNOG00000013884(Psd3),ENSRNOG00000028156(Pld1),ENSRNOG00000026573(Ophn1),	2.95414	0.016041	0.718927
GO:0043623	cellular protein complex assembly	biological_process	4	63	427	19765	ENSRNOG00000031760(Fmn1),ENSRNOG00000036658(Tbcd),ENSRNOG00000015334(Fcho2),ENSRNOG00000052814(Ankrd27),	2.93892	0.0260857	0.803767
GO:0033043	regulation of organelle organization	biological_process	8	63	867	19765	ENSRNOG00000009935(Xpo1),ENSRNOG00000031760(Fmn1),ENSRNOG00000006248(Trim37),ENSRNOG00000052814(Ankrd27),ENSRNOG00000036658(Tbcd),ENSRNOG00000006644(Kdm4c),ENSRNOG00000010771(Pkd1),ENSRNOG00000016680(Nsd1),	2.89486	0.00458746	0.484633
GO:0031988	membrane-bounded vesicle	cellular_component	7	63	760	19765	ENSRNOG00000018778(Cadm1),ENSRNOG00000005411(Aftph),ENSRNOG00000007596(Rffl),ENSRNOG00000028156(Pld1),ENSRNOG00000009170(Dmxl2),ENSRNOG00000052814(Ankrd27),ENSRNOG00000015334(Fcho2),	2.88962	0.00723813	0.53526
GO:0030425	dendrite	cellular_component	4	63	441	19765	ENSRNOG00000006462(Ero1l),ENSRNOG00000018778(Cadm1),ENSRNOG00000055382(Hcn1),ENSRNOG00000026573(Ophn1),	2.84563	0.0295428	0.891711
GO:0042175	nuclear outer membrane-endoplasmic reticulum membrane network	cellular_component	5	63	552	19765	ENSRNOG00000009935(Xpo1),ENSRNOG00000022523(Fkbp5),ENSRNOG00000006462(Ero1l),ENSRNOG00000036866(Acer3),ENSRNOG00000043329(Rnf180),	2.84176	0.0191275	0.764583
GO:0051345	positive regulation of hydrolase activity	biological_process	5	63	574	19765	ENSRNOG00000026573(Ophn1),ENSRNOG00000013884(Psd3),ENSRNOG00000052814(Ankrd27),ENSRNOG00000000940(Flt1),ENSRNOG00000036658(Tbcd),	2.73284	0.0227916	0.749084
GO:0016568	chromatin modification	biological_process	4	63	485	19765	ENSRNOG00000006248(Trim37),ENSRNOG00000003258(Cdc73),ENSRNOG00000016680(Nsd1),ENSRNOG00000006644(Kdm4c),	2.58747	0.042363	1
GO:0019901	protein kinase binding	molecular_function	4	63	488	19765	ENSRNOG00000007596(Rffl),ENSRNOG00000010771(Pkd1),ENSRNOG00000008145(Traf3),ENSRNOG00000028630(Ksr2),	2.57156	0.0433497	1
GO:0044255	cellular lipid metabolic process	biological_process	6	63	745	19765	ENSRNOG00000036866(Acer3),ENSRNOG00000000312(Fig4),ENSRNOG00000016878(Lppr5),ENSRNOG00000000940(Flt1),ENSRNOG00000010800(Hadhb),ENSRNOG00000028156(Pld1),	2.52669	0.0224078	0.753207
GO:0030162	regulation of proteolysis	biological_process	5	63	625	19765	ENSRNOG00000026573(Ophn1),ENSRNOG00000008145(Traf3),ENSRNOG00000043329(Rnf180),ENSRNOG00000010771(Pkd1),ENSRNOG00000007596(Rffl),	2.50984	0.0331358	0.960937
GO:0051603	proteolysis involved in cellular protein catabolic process	biological_process	4	63	527	19765	ENSRNOG00000007596(Rffl),ENSRNOG00000043329(Rnf180),ENSRNOG00000026573(Ophn1),ENSRNOG00000010771(Pkd1),	2.38125	0.0575482	1
GO:0046914	transition metal ion binding	molecular_function	10	63	1320	19765	ENSRNOG00000007111(Nrd1),ENSRNOG00000017593(Mtr),ENSRNOG00000009491(Phc3),ENSRNOG00000006248(Trim37),ENSRNOG00000013281(Mib1),ENSRNOG00000006644(Kdm4c),ENSRNOG00000043329(Rnf180),ENSRNOG00000008145(Traf3),ENSRNOG00000007596(Rffl),ENSRNOG00000016680(Nsd1),	2.37674	0.00842131	0.541527
GO:0016788	hydrolase activity, acting on ester bonds	molecular_function	5	63	665	19765	ENSRNOG00000028156(Pld1),ENSRNOG00000016878(Lppr5),ENSRNOG00000000312(Fig4),ENSRNOG00000003041(Smg6),ENSRNOG00000060561(Gdpd1),	2.35887	0.0432267	1
GO:0005789	endoplasmic reticulum membrane	cellular_component	4	63	535	19765	ENSRNOG00000043329(Rnf180),ENSRNOG00000036866(Acer3),ENSRNOG00000006462(Ero1l),ENSRNOG00000022523(Fkbp5),	2.34565	0.0607826	1
GO:0007010	cytoskeleton organization	biological_process	7	63	940	19765	ENSRNOG00000026573(Ophn1),ENSRNOG00000017883(Camsap1),ENSRNOG00000010771(Pkd1),ENSRNOG00000006248(Trim37),ENSRNOG00000036658(Tbcd),ENSRNOG00000009935(Xpo1),ENSRNOG00000031760(Fmn1),	2.33629	0.0240584	0.757071
GO:0030163	protein catabolic process	biological_process	5	63	676	19765	ENSRNOG00000010771(Pkd1),ENSRNOG00000026573(Ophn1),ENSRNOG00000043329(Rnf180),ENSRNOG00000007596(Rffl),ENSRNOG00000009935(Xpo1),	2.32049	0.046328	1
GO:0098588	bounding membrane of organelle	cellular_component	10	63	1363	19765	ENSRNOG00000019776(Sh3gl3),ENSRNOG00000043329(Rnf180),ENSRNOG00000036866(Acer3),ENSRNOG00000007596(Rffl),ENSRNOG00000022523(Fkbp5),ENSRNOG00000010800(Hadhb),ENSRNOG00000028156(Pld1),ENSRNOG00000006462(Ero1l),ENSRNOG00000000312(Fig4),ENSRNOG00000005411(Aftph),	2.30176	0.0106007	0.580684
GO:0019900	kinase binding	molecular_function	4	63	550	19765	ENSRNOG00000007596(Rffl),ENSRNOG00000028630(Ksr2),ENSRNOG00000008145(Traf3),ENSRNOG00000010771(Pkd1),	2.28167	0.0671496	1
GO:0019904	protein domain specific binding	molecular_function	4	63	551	19765	ENSRNOG00000031760(Fmn1),ENSRNOG00000009935(Xpo1),ENSRNOG00000010771(Pkd1),ENSRNOG00000007921(Hnrnpm),	2.27753	0.0675882	1
GO:0044257	cellular protein catabolic process	biological_process	4	63	552	19765	ENSRNOG00000007596(Rffl),ENSRNOG00000026573(Ophn1),ENSRNOG00000043329(Rnf180),ENSRNOG00000010771(Pkd1),	2.27341	0.0680286	1
GO:0016773	phosphotransferase activity, alcohol group as acceptor	molecular_function	5	63	693	19765	ENSRNOG00000028630(Ksr2),ENSRNOG00000014856(Etnk1),ENSRNOG00000042519(Peak1),ENSRNOG00000000940(Flt1),ENSRNOG00000001662(Dyrk1a),	2.26357	0.0514085	1
GO:0044265	cellular macromolecule catabolic process	biological_process	5	63	698	19765	ENSRNOG00000007596(Rffl),ENSRNOG00000003041(Smg6),ENSRNOG00000043329(Rnf180),ENSRNOG00000026573(Ophn1),ENSRNOG00000010771(Pkd1),	2.24735	0.0529703	1
GO:0030182	neuron differentiation	biological_process	8	63	1118	19765	ENSRNOG00000013281(Mib1),ENSRNOG00000031760(Fmn1),ENSRNOG00000017593(Mtr),ENSRNOG00000052814(Ankrd27),ENSRNOG00000017883(Camsap1),ENSRNOG00000055382(Hcn1),ENSRNOG00000000312(Fig4),ENSRNOG00000013884(Psd3),	2.24494	0.0223571	0.768981
GO:0016482	cytosolic transport	biological_process	4	63	560	19765	ENSRNOG00000010771(Pkd1),ENSRNOG00000026573(Ophn1),ENSRNOG00000009935(Xpo1),ENSRNOG00000052814(Ankrd27),	2.24093	0.0716156	1
GO:0006629	lipid metabolic process	biological_process	7	63	997	19765	ENSRNOG00000028156(Pld1),ENSRNOG00000010800(Hadhb),ENSRNOG00000016878(Lppr5),ENSRNOG00000000940(Flt1),ENSRNOG00000060561(Gdpd1),ENSRNOG00000000312(Fig4),ENSRNOG00000036866(Acer3),	2.20272	0.0329507	0.974682
GO:0051128	regulation of cellular component organization	biological_process	13	63	1863	19765	ENSRNOG00000036658(Tbcd),ENSRNOG00000006248(Trim37),ENSRNOG00000052814(Ankrd27),ENSRNOG00000009935(Xpo1),ENSRNOG00000031760(Fmn1),ENSRNOG00000026573(Ophn1),ENSRNOG00000010771(Pkd1),ENSRNOG00000013281(Mib1),ENSRNOG00000006644(Kdm4c),ENSRNOG00000028156(Pld1),ENSRNOG00000000312(Fig4),ENSRNOG00000017883(Camsap1),ENSRNOG00000016680(Nsd1),	2.18921	0.00677785	0.556913
GO:0006325	chromatin organization	biological_process	4	63	577	19765	ENSRNOG00000006248(Trim37),ENSRNOG00000006644(Kdm4c),ENSRNOG00000016680(Nsd1),ENSRNOG00000003258(Cdc73),	2.17491	0.0796183	1
GO:0048666	neuron development	biological_process	6	63	868	19765	ENSRNOG00000017593(Mtr),ENSRNOG00000031760(Fmn1),ENSRNOG00000052814(Ankrd27),ENSRNOG00000017883(Camsap1),ENSRNOG00000000312(Fig4),ENSRNOG00000055382(Hcn1),	2.16864	0.0468175	1
GO:0005694	chromosome	cellular_component	5	63	730	19765	ENSRNOG00000009700(Dync1i1),ENSRNOG00000009935(Xpo1),ENSRNOG00000003258(Cdc73),ENSRNOG00000015389(Stag1),ENSRNOG00000006644(Kdm4c),	2.14884	0.0637116	1
GO:0031175	neuron projection development	biological_process	5	63	734	19765	ENSRNOG00000031760(Fmn1),ENSRNOG00000017593(Mtr),ENSRNOG00000052814(Ankrd27),ENSRNOG00000017883(Camsap1),ENSRNOG00000000312(Fig4),	2.13713	0.0651464	1
GO:0004672	protein kinase activity	molecular_function	4	63	588	19765	ENSRNOG00000042519(Peak1),ENSRNOG00000028630(Ksr2),ENSRNOG00000000940(Flt1),ENSRNOG00000001662(Dyrk1a),	2.13422	0.0850742	1
GO:0048729	tissue morphogenesis	biological_process	4	63	590	19765	ENSRNOG00000031760(Fmn1),ENSRNOG00000055382(Hcn1),ENSRNOG00000010771(Pkd1),ENSRNOG00000013281(Mib1),	2.12698	0.0860898	1
GO:0019899	enzyme binding	molecular_function	10	63	1503	19765	ENSRNOG00000006248(Trim37),ENSRNOG00000052814(Ankrd27),ENSRNOG00000009935(Xpo1),ENSRNOG00000008145(Traf3),ENSRNOG00000003258(Cdc73),ENSRNOG00000043329(Rnf180),ENSRNOG00000028630(Ksr2),ENSRNOG00000010771(Pkd1),ENSRNOG00000007596(Rffl),ENSRNOG00000009170(Dmxl2),	2.08736	0.0208986	0.753878
GO:0016740	transferase activity	molecular_function	14	63	2111	19765	ENSRNOG00000016680(Nsd1),ENSRNOG00000007596(Rffl),ENSRNOG00000010800(Hadhb),ENSRNOG00000008145(Traf3),ENSRNOG00000028630(Ksr2),ENSRNOG00000013281(Mib1),ENSRNOG00000008872(Tmem68),ENSRNOG00000006248(Trim37),ENSRNOG00000042519(Peak1),ENSRNOG00000043329(Rnf180),ENSRNOG00000014856(Etnk1),ENSRNOG00000001662(Dyrk1a),ENSRNOG00000000940(Flt1),ENSRNOG00000017593(Mtr),	2.08064	0.00823338	0.553508
GO:0018193	peptidyl-amino acid modification	biological_process	6	63	913	19765	ENSRNOG00000001662(Dyrk1a),ENSRNOG00000000940(Flt1),ENSRNOG00000022523(Fkbp5),ENSRNOG00000006644(Kdm4c),ENSRNOG00000016680(Nsd1),ENSRNOG00000010771(Pkd1),	2.06175	0.0591076	1
GO:0043005	neuron projection	cellular_component	6	63	915	19765	ENSRNOG00000026573(Ophn1),ENSRNOG00000055382(Hcn1),ENSRNOG00000018778(Cadm1),ENSRNOG00000006462(Ero1l),ENSRNOG00000052814(Ankrd27),ENSRNOG00000002126(Ncam2),	2.05725	0.0596995	1
GO:0005654	nucleoplasm	cellular_component	11	63	1698	19765	ENSRNOG00000022523(Fkbp5),ENSRNOG00000005411(Aftph),ENSRNOG00000007921(Hnrnpm),ENSRNOG00000005624(Zfx),ENSRNOG00000042519(Peak1),ENSRNOG00000054294(Rprd2),ENSRNOG00000006248(Trim37),ENSRNOG00000001662(Dyrk1a),ENSRNOG00000009935(Xpo1),ENSRNOG00000003258(Cdc73),ENSRNOG00000014856(Etnk1),	2.03241	0.0198988	0.754623
GO:0051223	regulation of protein transport	biological_process	4	63	618	19765	ENSRNOG00000009935(Xpo1),ENSRNOG00000007921(Hnrnpm),ENSRNOG00000010771(Pkd1),ENSRNOG00000018778(Cadm1),	2.03062	0.101072	1
GO:0048699	generation of neurons	biological_process	8	63	1245	19765	ENSRNOG00000055382(Hcn1),ENSRNOG00000000312(Fig4),ENSRNOG00000017883(Camsap1),ENSRNOG00000013884(Psd3),ENSRNOG00000013281(Mib1),ENSRNOG00000052814(Ankrd27),ENSRNOG00000031760(Fmn1),ENSRNOG00000017593(Mtr),	2.01594	0.0414294	1
GO:0033365	protein localization to organelle	biological_process	4	63	623	19765	ENSRNOG00000009935(Xpo1),ENSRNOG00000025539(Vps13a),ENSRNOG00000007921(Hnrnpm),ENSRNOG00000010771(Pkd1),	2.01432	0.103898	1
GO:0016301	kinase activity	molecular_function	5	63	785	19765	ENSRNOG00000000940(Flt1),ENSRNOG00000001662(Dyrk1a),ENSRNOG00000028630(Ksr2),ENSRNOG00000014856(Etnk1),ENSRNOG00000042519(Peak1),	1.99828	0.0852905	1
GO:0031090	organelle membrane	cellular_component	12	63	1901	19765	ENSRNOG00000006462(Ero1l),ENSRNOG00000000312(Fig4),ENSRNOG00000005411(Aftph),ENSRNOG00000011849(Ndufs1),ENSRNOG00000022523(Fkbp5),ENSRNOG00000010800(Hadhb),ENSRNOG00000028156(Pld1),ENSRNOG00000007596(Rffl),ENSRNOG00000036866(Acer3),ENSRNOG00000043329(Rnf180),ENSRNOG00000009935(Xpo1),ENSRNOG00000019776(Sh3gl3),	1.98041	0.0193357	0.752565
GO:0045202	synapse	cellular_component	4	63	641	19765	ENSRNOG00000009170(Dmxl2),ENSRNOG00000026573(Ophn1),ENSRNOG00000013281(Mib1),ENSRNOG00000018778(Cadm1),	1.95775	0.114449	1
GO:0012505	endomembrane system	cellular_component	17	63	2727	19765	ENSRNOG00000006462(Ero1l),ENSRNOG00000000312(Fig4),ENSRNOG00000007596(Rffl),ENSRNOG00000010800(Hadhb),ENSRNOG00000028156(Pld1),ENSRNOG00000015334(Fcho2),ENSRNOG00000019776(Sh3gl3),ENSRNOG00000018778(Cadm1),ENSRNOG00000005411(Aftph),ENSRNOG00000009170(Dmxl2),ENSRNOG00000022523(Fkbp5),ENSRNOG00000010771(Pkd1),ENSRNOG00000036866(Acer3),ENSRNOG00000043329(Rnf180),ENSRNOG00000009935(Xpo1),ENSRNOG00000…	1.95578	0.00767632	0.540632
GO:1990234	transferase complex	cellular_component	4	63	646	19765	ENSRNOG00000003258(Cdc73),ENSRNOG00000009491(Phc3),ENSRNOG00000054294(Rprd2),ENSRNOG00000006248(Trim37),	1.9426	0.117485	1
GO:0016192	vesicle-mediated transport	biological_process	6	63	978	19765	ENSRNOG00000019776(Sh3gl3),ENSRNOG00000015334(Fcho2),ENSRNOG00000052814(Ankrd27),ENSRNOG00000028156(Pld1),ENSRNOG00000026573(Ophn1),ENSRNOG00000013281(Mib1),	1.92472	0.0804278	1
GO:0051276	chromosome organization	biological_process	5	63	821	19765	ENSRNOG00000006248(Trim37),ENSRNOG00000003041(Smg6),ENSRNOG00000003258(Cdc73),ENSRNOG00000006644(Kdm4c),ENSRNOG00000016680(Nsd1),	1.91066	0.101623	1
GO:0070201	regulation of establishment of protein localization	biological_process	4	63	660	19765	ENSRNOG00000007921(Hnrnpm),ENSRNOG00000018778(Cadm1),ENSRNOG00000010771(Pkd1),ENSRNOG00000009935(Xpo1),	1.90139	0.126229	1
GO:0036477	somatodendritic compartment	cellular_component	4	63	660	19765	ENSRNOG00000006462(Ero1l),ENSRNOG00000018778(Cadm1),ENSRNOG00000055382(Hcn1),ENSRNOG00000026573(Ophn1),	1.90139	0.126229	1
GO:0022008	neurogenesis	biological_process	8	63	1342	19765	ENSRNOG00000017593(Mtr),ENSRNOG00000031760(Fmn1),ENSRNOG00000052814(Ankrd27),ENSRNOG00000013281(Mib1),ENSRNOG00000013884(Psd3),ENSRNOG00000017883(Camsap1),ENSRNOG00000000312(Fig4),ENSRNOG00000055382(Hcn1),	1.87022	0.0623533	1
GO:0048646	anatomical structure formation involved in morphogenesis	biological_process	6	63	1027	19765	ENSRNOG00000000312(Fig4),ENSRNOG00000000940(Flt1),ENSRNOG00000031760(Fmn1),ENSRNOG00000003258(Cdc73),ENSRNOG00000013281(Mib1),ENSRNOG00000006644(Kdm4c),	1.83289	0.0994406	1
GO:0019637	organophosphate metabolic process	biological_process	5	63	859	19765	ENSRNOG00000000312(Fig4),ENSRNOG00000011849(Ndufs1),ENSRNOG00000028156(Pld1),ENSRNOG00000000940(Flt1),ENSRNOG00000016878(Lppr5),	1.82614	0.120801	1
GO:0043085	positive regulation of catalytic activity	biological_process	6	63	1039	19765	ENSRNOG00000036658(Tbcd),ENSRNOG00000052814(Ankrd27),ENSRNOG00000000940(Flt1),ENSRNOG00000010771(Pkd1),ENSRNOG00000026573(Ophn1),ENSRNOG00000013884(Psd3),	1.81172	0.104494	1
GO:0007399	nervous system development	biological_process	11	63	1905	19765	ENSRNOG00000052814(Ankrd27),ENSRNOG00000017593(Mtr),ENSRNOG00000031760(Fmn1),ENSRNOG00000026573(Ophn1),ENSRNOG00000010771(Pkd1),ENSRNOG00000013281(Mib1),ENSRNOG00000013884(Psd3),ENSRNOG00000000312(Fig4),ENSRNOG00000055382(Hcn1),ENSRNOG00000018778(Cadm1),ENSRNOG00000017883(Camsap1),	1.81157	0.0440601	1
GO:0015630	microtubule cytoskeleton	cellular_component	5	63	891	19765	ENSRNOG00000013281(Mib1),ENSRNOG00000017883(Camsap1),ENSRNOG00000031760(Fmn1),ENSRNOG00000009700(Dync1i1),ENSRNOG00000036658(Tbcd),	1.76055	0.138504	1
GO:0007155	cell adhesion	biological_process	6	63	1075	19765	ENSRNOG00000018778(Cadm1),ENSRNOG00000042519(Peak1),ENSRNOG00000010771(Pkd1),ENSRNOG00000009771(Cdh10),ENSRNOG00000031760(Fmn1),ENSRNOG00000002126(Ncam2),	1.75105	0.120607	1
GO:0030054	cell junction	cellular_component	5	63	898	19765	ENSRNOG00000026573(Ophn1),ENSRNOG00000042519(Peak1),ENSRNOG00000036658(Tbcd),ENSRNOG00000000940(Flt1),ENSRNOG00000013884(Psd3),	1.74683	0.142566	1
GO:0046907	intracellular transport	biological_process	8	63	1440	19765	ENSRNOG00000005411(Aftph),ENSRNOG00000006462(Ero1l),ENSRNOG00000007596(Rffl),ENSRNOG00000025539(Vps13a),ENSRNOG00000026573(Ophn1),ENSRNOG00000010771(Pkd1),ENSRNOG00000052814(Ankrd27),ENSRNOG00000009935(Xpo1),	1.74295	0.0899974	1
GO:0048468	cell development	biological_process	10	63	1805	19765	ENSRNOG00000055382(Hcn1),ENSRNOG00000000312(Fig4),ENSRNOG00000042519(Peak1),ENSRNOG00000005624(Zfx),ENSRNOG00000017883(Camsap1),ENSRNOG00000052814(Ankrd27),ENSRNOG00000031760(Fmn1),ENSRNOG00000017593(Mtr),ENSRNOG00000006644(Kdm4c),ENSRNOG00000013281(Mib1),	1.73812	0.0671983	1
GO:0030030	cell projection organization	biological_process	6	63	1086	19765	ENSRNOG00000028156(Pld1),ENSRNOG00000017883(Camsap1),ENSRNOG00000000312(Fig4),ENSRNOG00000017593(Mtr),ENSRNOG00000031760(Fmn1),ENSRNOG00000052814(Ankrd27),	1.73332	0.125817	1
GO:0031401	positive regulation of protein modification process	biological_process	5	63	918	19765	ENSRNOG00000043329(Rnf180),ENSRNOG00000028630(Ksr2),ENSRNOG00000010771(Pkd1),ENSRNOG00000000940(Flt1),ENSRNOG00000001662(Dyrk1a),	1.70877	0.154544	1
GO:0034622	cellular macromolecular complex assembly	biological_process	4	63	736	19765	ENSRNOG00000015334(Fcho2),ENSRNOG00000036658(Tbcd),ENSRNOG00000052814(Ankrd27),ENSRNOG00000031760(Fmn1),	1.70506	0.179837	1
GO:0005829	cytosol	cellular_component	8	63	1478	19765	ENSRNOG00000042978(Ncald),ENSRNOG00000006340(Memo1),ENSRNOG00000005411(Aftph),ENSRNOG00000007596(Rffl),ENSRNOG00000010771(Pkd1),ENSRNOG00000028630(Ksr2),ENSRNOG00000007111(Nrd1),ENSRNOG00000006248(Trim37),	1.69813	0.102617	1
GO:0016772	transferase activity, transferring phosphorus-containing groups	molecular_function	5	63	924	19765	ENSRNOG00000001662(Dyrk1a),ENSRNOG00000000940(Flt1),ENSRNOG00000042519(Peak1),ENSRNOG00000014856(Etnk1),ENSRNOG00000028630(Ksr2),	1.69767	0.158245	1
GO:0051726	regulation of cell cycle	biological_process	4	63	740	19765	ENSRNOG00000003258(Cdc73),ENSRNOG00000010771(Pkd1),ENSRNOG00000006248(Trim37),ENSRNOG00000009935(Xpo1),	1.69584	0.18294	1
GO:0005783	endoplasmic reticulum	cellular_component	6	63	1112	19765	ENSRNOG00000000312(Fig4),ENSRNOG00000006462(Ero1l),ENSRNOG00000022523(Fkbp5),ENSRNOG00000010800(Hadhb),ENSRNOG00000036866(Acer3),ENSRNOG00000043329(Rnf180),	1.69279	0.138668	1
GO:0006996	organelle organization	biological_process	15	63	2805	19765	ENSRNOG00000011849(Ndufs1),ENSRNOG00000026573(Ophn1),ENSRNOG00000006644(Kdm4c),ENSRNOG00000010771(Pkd1),ENSRNOG00000052814(Ankrd27),ENSRNOG00000009935(Xpo1),ENSRNOG00000003041(Smg6),ENSRNOG00000000312(Fig4),ENSRNOG00000017883(Camsap1),ENSRNOG00000016680(Nsd1),ENSRNOG00000015334(Fcho2),ENSRNOG00000003258(Cdc73),ENSRNOG00000006248(Trim37),ENSRNOG00000036658(Tbcd),ENSRNOG00000031760(Fmn1),	1.6777	0.0422965	1
GO:0031981	nuclear lumen	cellular_component	13	63	2438	19765	ENSRNOG00000005624(Zfx),ENSRNOG00000042519(Peak1),ENSRNOG00000005411(Aftph),ENSRNOG00000022523(Fkbp5),ENSRNOG00000014856(Etnk1),ENSRNOG00000009935(Xpo1),ENSRNOG00000001662(Dyrk1a),ENSRNOG00000016680(Nsd1),ENSRNOG00000007921(Hnrnpm),ENSRNOG00000003041(Smg6),ENSRNOG00000003258(Cdc73),ENSRNOG00000054294(Rprd2),ENSRNOG00000006248(Trim37),	1.67288	0.0563345	1
GO:0009653	anatomical structure morphogenesis	biological_process	12	63	2251	19765	ENSRNOG00000010771(Pkd1),ENSRNOG00000006644(Kdm4c),ENSRNOG00000052814(Ankrd27),ENSRNOG00000000940(Flt1),ENSRNOG00000018778(Cadm1),ENSRNOG00000042519(Peak1),ENSRNOG00000013281(Mib1),ENSRNOG00000003258(Cdc73),ENSRNOG00000031760(Fmn1),ENSRNOG00000017883(Camsap1),ENSRNOG00000000312(Fig4),ENSRNOG00000055382(Hcn1),	1.67248	0.064456	1
GO:0031982	vesicle	cellular_component	15	63	2843	19765	ENSRNOG00000019776(Sh3gl3),ENSRNOG00000013281(Mib1),ENSRNOG00000015334(Fcho2),ENSRNOG00000028156(Pld1),ENSRNOG00000010800(Hadhb),ENSRNOG00000007596(Rffl),ENSRNOG00000007921(Hnrnpm),ENSRNOG00000042978(Ncald),ENSRNOG00000009700(Dync1i1),ENSRNOG00000052814(Ankrd27),ENSRNOG00000010771(Pkd1),ENSRNOG00000009170(Dmxl2),ENSRNOG00000022523(Fkbp5),ENSRNOG00000005411(Aftph),ENSRNOG00000018778(Cadm1),	1.65528	0.047041	1
GO:0051707	response to other organism	biological_process	4	63	763	19765	ENSRNOG00000028156(Pld1),ENSRNOG00000007921(Hnrnpm),ENSRNOG00000003258(Cdc73),ENSRNOG00000008145(Traf3),	1.64472	0.201311	1
GO:0043207	response to external biotic stimulus	biological_process	4	63	766	19765	ENSRNOG00000007921(Hnrnpm),ENSRNOG00000003258(Cdc73),ENSRNOG00000008145(Traf3),ENSRNOG00000028156(Pld1),	1.63828	0.203773	1
GO:0005856	cytoskeleton	cellular_component	8	63	1535	19765	ENSRNOG00000009700(Dync1i1),ENSRNOG00000036658(Tbcd),ENSRNOG00000009491(Phc3),ENSRNOG00000031760(Fmn1),ENSRNOG00000026573(Ophn1),ENSRNOG00000013281(Mib1),ENSRNOG00000017883(Camsap1),ENSRNOG00000042519(Peak1),	1.63508	0.123628	1
GO:0032880	regulation of protein localization	biological_process	4	63	775	19765	ENSRNOG00000018778(Cadm1),ENSRNOG00000010771(Pkd1),ENSRNOG00000007921(Hnrnpm),ENSRNOG00000009935(Xpo1),	1.61925	0.211248	1
GO:0042995	cell projection	cellular_component	8	63	1586	19765	ENSRNOG00000052814(Ankrd27),ENSRNOG00000002126(Ncam2),ENSRNOG00000026573(Ophn1),ENSRNOG00000010771(Pkd1),ENSRNOG00000028156(Pld1),ENSRNOG00000055382(Hcn1),ENSRNOG00000006462(Ero1l),ENSRNOG00000018778(Cadm1),	1.5825	0.14459	1
GO:0051246	regulation of protein metabolic process	biological_process	11	63	2201	19765	ENSRNOG00000043329(Rnf180),ENSRNOG00000026573(Ophn1),ENSRNOG00000006644(Kdm4c),ENSRNOG00000010771(Pkd1),ENSRNOG00000000940(Flt1),ENSRNOG00000001662(Dyrk1a),ENSRNOG00000009935(Xpo1),ENSRNOG00000016680(Nsd1),ENSRNOG00000007596(Rffl),ENSRNOG00000008145(Traf3),ENSRNOG00000028630(Ksr2),	1.56794	0.108983	1
GO:0030529	intracellular ribonucleoprotein complex	cellular_component	5	63	1001	19765	ENSRNOG00000001662(Dyrk1a),ENSRNOG00000009700(Dync1i1),ENSRNOG00000009935(Xpo1),ENSRNOG00000003041(Smg6),ENSRNOG00000007921(Hnrnpm),	1.56708	0.210064	1
GO:0043167	ion binding	molecular_function	26	63	5208	19765	ENSRNOG00000008145(Traf3),ENSRNOG00000007111(Nrd1),ENSRNOG00000016680(Nsd1),ENSRNOG00000028156(Pld1),ENSRNOG00000010800(Hadhb),ENSRNOG00000017593(Mtr),ENSRNOG00000005624(Zfx),ENSRNOG00000042519(Peak1),ENSRNOG00000028630(Ksr2),ENSRNOG00000013281(Mib1),ENSRNOG00000006248(Trim37),ENSRNOG00000009491(Phc3),ENSRNOG00000055382(Hcn1),ENSRNOG00000042978(Ncald),ENSRNOG00000015334(Fcho2),ENSRNOG00000007596(…	1.56624	0.0234033	0.752468
GO:0046872	metal ion binding	molecular_function	16	63	3214	19765	ENSRNOG00000007596(Rffl),ENSRNOG00000002112(Zfp644),ENSRNOG00000016680(Nsd1),ENSRNOG00000042978(Ncald),ENSRNOG00000009491(Phc3),ENSRNOG00000007111(Nrd1),ENSRNOG00000006248(Trim37),ENSRNOG00000013281(Mib1),ENSRNOG00000028630(Ksr2),ENSRNOG00000008145(Traf3),ENSRNOG00000011849(Ndufs1),ENSRNOG00000005624(Zfx),ENSRNOG00000017593(Mtr),ENSRNOG00000009771(Cdh10),ENSRNOG00000006644(Kdm4c),ENSRNOG000000433…	1.56182	0.0661106	1
GO:0005794	Golgi apparatus	cellular_component	5	63	1006	19765	ENSRNOG00000028156(Pld1),ENSRNOG00000010771(Pkd1),ENSRNOG00000005411(Aftph),ENSRNOG00000000312(Fig4),ENSRNOG00000036866(Acer3),	1.5593	0.213701	1
GO:0009607	response to biotic stimulus	biological_process	4	63	805	19765	ENSRNOG00000008145(Traf3),ENSRNOG00000003258(Cdc73),ENSRNOG00000007921(Hnrnpm),ENSRNOG00000028156(Pld1),	1.55891	0.237115	1
GO:0051649	establishment of localization in cell	biological_process	8	63	1617	19765	ENSRNOG00000025539(Vps13a),ENSRNOG00000026573(Ophn1),ENSRNOG00000010771(Pkd1),ENSRNOG00000052814(Ankrd27),ENSRNOG00000009935(Xpo1),ENSRNOG00000005411(Aftph),ENSRNOG00000006462(Ero1l),ENSRNOG00000007596(Rffl),	1.55216	0.158342	1
GO:0009056	catabolic process	biological_process	8	63	1645	19765	ENSRNOG00000007596(Rffl),ENSRNOG00000010800(Hadhb),ENSRNOG00000028156(Pld1),ENSRNOG00000003041(Smg6),ENSRNOG00000009935(Xpo1),ENSRNOG00000010771(Pkd1),ENSRNOG00000043329(Rnf180),ENSRNOG00000026573(Ophn1),	1.52574	0.171422	1
GO:0043169	cation binding	molecular_function	16	63	3293	19765	ENSRNOG00000043329(Rnf180),ENSRNOG00000009771(Cdh10),ENSRNOG00000006644(Kdm4c),ENSRNOG00000017593(Mtr),ENSRNOG00000005624(Zfx),ENSRNOG00000011849(Ndufs1),ENSRNOG00000028630(Ksr2),ENSRNOG00000008145(Traf3),ENSRNOG00000013281(Mib1),ENSRNOG00000006248(Trim37),ENSRNOG00000009491(Phc3),ENSRNOG00000007111(Nrd1),ENSRNOG00000016680(Nsd1),ENSRNOG00000042978(Ncald),ENSRNOG00000002112(Zfp644),ENSRNOG0000000…	1.52435	0.0796852	1
GO:0051641	cellular localization	biological_process	11	63	2308	19765	ENSRNOG00000015334(Fcho2),ENSRNOG00000007596(Rffl),ENSRNOG00000006462(Ero1l),ENSRNOG00000007921(Hnrnpm),ENSRNOG00000005411(Aftph),ENSRNOG00000018778(Cadm1),ENSRNOG00000052814(Ankrd27),ENSRNOG00000009935(Xpo1),ENSRNOG00000026573(Ophn1),ENSRNOG00000025539(Vps13a),ENSRNOG00000010771(Pkd1),	1.49525	0.143246	1
GO:0000902	cell morphogenesis	biological_process	5	63	1050	19765	ENSRNOG00000018778(Cadm1),ENSRNOG00000017883(Camsap1),ENSRNOG00000042519(Peak1),ENSRNOG00000052814(Ankrd27),ENSRNOG00000031760(Fmn1),	1.49395	0.247079	1
GO:0006886	intracellular protein transport	biological_process	4	63	841	19765	ENSRNOG00000009935(Xpo1),ENSRNOG00000007596(Rffl),ENSRNOG00000025539(Vps13a),ENSRNOG00000010771(Pkd1),	1.49218	0.27001	1
GO:0034613	cellular protein localization	biological_process	6	63	1271	19765	ENSRNOG00000025539(Vps13a),ENSRNOG00000010771(Pkd1),ENSRNOG00000009935(Xpo1),ENSRNOG00000007921(Hnrnpm),ENSRNOG00000015334(Fcho2),ENSRNOG00000007596(Rffl),	1.48102	0.233509	1
GO:0009887	organ morphogenesis	biological_process	4	63	868	19765	ENSRNOG00000031760(Fmn1),ENSRNOG00000055382(Hcn1),ENSRNOG00000013281(Mib1),ENSRNOG00000010771(Pkd1),	1.44576	0.295933	1
GO:0032403	protein complex binding	molecular_function	4	63	873	19765	ENSRNOG00000017883(Camsap1),ENSRNOG00000003258(Cdc73),ENSRNOG00000031760(Fmn1),ENSRNOG00000010800(Hadhb),	1.43748	0.300846	1
GO:0036211	protein modification process	biological_process	14	63	3069	19765	ENSRNOG00000007596(Rffl),ENSRNOG00000016680(Nsd1),ENSRNOG00000006248(Trim37),ENSRNOG00000013281(Mib1),ENSRNOG00000003258(Cdc73),ENSRNOG00000008145(Traf3),ENSRNOG00000028630(Ksr2),ENSRNOG00000022523(Fkbp5),ENSRNOG00000042519(Peak1),ENSRNOG00000000940(Flt1),ENSRNOG00000001662(Dyrk1a),ENSRNOG00000006644(Kdm4c),ENSRNOG00000010771(Pkd1),ENSRNOG00000043329(Rnf180),	1.43116	0.146167	1
GO:0006464	cellular protein modification process	biological_process	14	63	3069	19765	ENSRNOG00000028630(Ksr2),ENSRNOG00000008145(Traf3),ENSRNOG00000003258(Cdc73),ENSRNOG00000013281(Mib1),ENSRNOG00000006248(Trim37),ENSRNOG00000016680(Nsd1),ENSRNOG00000007596(Rffl),ENSRNOG00000043329(Rnf180),ENSRNOG00000010771(Pkd1),ENSRNOG00000006644(Kdm4c),ENSRNOG00000001662(Dyrk1a),ENSRNOG00000000940(Flt1),ENSRNOG00000042519(Peak1),ENSRNOG00000022523(Fkbp5),	1.43116	0.146167	1
GO:0050790	regulation of catalytic activity	biological_process	8	63	1759	19765	ENSRNOG00000007596(Rffl),ENSRNOG00000013884(Psd3),ENSRNOG00000052814(Ankrd27),ENSRNOG00000000940(Flt1),ENSRNOG00000036658(Tbcd),ENSRNOG00000010771(Pkd1),ENSRNOG00000043329(Rnf180),ENSRNOG00000026573(Ophn1),	1.42686	0.231085	1
GO:0043168	anion binding	molecular_function	11	63	2441	19765	ENSRNOG00000055382(Hcn1),ENSRNOG00000010800(Hadhb),ENSRNOG00000028156(Pld1),ENSRNOG00000015334(Fcho2),ENSRNOG00000028630(Ksr2),ENSRNOG00000042519(Peak1),ENSRNOG00000013884(Psd3),ENSRNOG00000026573(Ophn1),ENSRNOG00000004076(Pms1),ENSRNOG00000001662(Dyrk1a),ENSRNOG00000000940(Flt1),	1.41378	0.194578	1
GO:0009893	positive regulation of metabolic process	biological_process	13	63	2905	19765	ENSRNOG00000013884(Psd3),ENSRNOG00000015389(Stag1),ENSRNOG00000001662(Dyrk1a),ENSRNOG00000052814(Ankrd27),ENSRNOG00000000940(Flt1),ENSRNOG00000043329(Rnf180),ENSRNOG00000026573(Ophn1),ENSRNOG00000010771(Pkd1),ENSRNOG00000016680(Nsd1),ENSRNOG00000006248(Trim37),ENSRNOG00000036658(Tbcd),ENSRNOG00000003258(Cdc73),ENSRNOG00000028630(Ksr2),	1.40396	0.176397	1
GO:0003824	catalytic activity	molecular_function	24	63	5432	19765	ENSRNOG00000000940(Flt1),ENSRNOG00000001662(Dyrk1a),ENSRNOG00000043329(Rnf180),ENSRNOG00000011849(Ndufs1),ENSRNOG00000060561(Gdpd1),ENSRNOG00000006248(Trim37),ENSRNOG00000013281(Mib1),ENSRNOG00000008872(Tmem68),ENSRNOG00000028630(Ksr2),ENSRNOG00000007596(Rffl),ENSRNOG00000006462(Ero1l),ENSRNOG00000000312(Fig4),ENSRNOG00000017593(Mtr),ENSRNOG00000016878(Lppr5),ENSRNOG00000014856(Etnk1),ENSRNOG0000…	1.38614	0.0971794	1
GO:0036094	small molecule binding	molecular_function	11	63	2493	19765	ENSRNOG00000006718(Rbm33),ENSRNOG00000042519(Peak1),ENSRNOG00000017593(Mtr),ENSRNOG00000004076(Pms1),ENSRNOG00000000940(Flt1),ENSRNOG00000001662(Dyrk1a),ENSRNOG00000010800(Hadhb),ENSRNOG00000015334(Fcho2),ENSRNOG00000007921(Hnrnpm),ENSRNOG00000055382(Hcn1),ENSRNOG00000028630(Ksr2),	1.38429	0.217314	1
GO:0035556	intracellular signal transduction	biological_process	9	63	2046	19765	ENSRNOG00000028156(Pld1),ENSRNOG00000013884(Psd3),ENSRNOG00000007596(Rffl),ENSRNOG00000006462(Ero1l),ENSRNOG00000042978(Ncald),ENSRNOG00000000940(Flt1),ENSRNOG00000001662(Dyrk1a),ENSRNOG00000010771(Pkd1),ENSRNOG00000028630(Ksr2),	1.38004	0.250176	1
GO:0005515	protein binding	molecular_function	39	63	8871	19765	ENSRNOG00000006462(Ero1l),ENSRNOG00000003258(Cdc73),ENSRNOG00000006248(Trim37),ENSRNOG00000031760(Fmn1),ENSRNOG00000011849(Ndufs1),ENSRNOG00000043329(Rnf180),ENSRNOG00000057740(Ccdc148),ENSRNOG00000026573(Ophn1),ENSRNOG00000001662(Dyrk1a),ENSRNOG00000009935(Xpo1),ENSRNOG00000006340(Memo1),ENSRNOG00000016680(Nsd1),ENSRNOG00000010800(Hadhb),ENSRNOG00000008145(Traf3),ENSRNOG00000036658(Tbcd),ENSRNOG…	1.37927	0.0438229	1
GO:0032268	regulation of cellular protein metabolic process	biological_process	9	63	2050	19765	ENSRNOG00000001662(Dyrk1a),ENSRNOG00000000940(Flt1),ENSRNOG00000043329(Rnf180),ENSRNOG00000026573(Ophn1),ENSRNOG00000006644(Kdm4c),ENSRNOG00000010771(Pkd1),ENSRNOG00000007596(Rffl),ENSRNOG00000016680(Nsd1),ENSRNOG00000028630(Ksr2),	1.37735	0.25239	1
GO:0032270	positive regulation of cellular protein metabolic process	biological_process	5	63	1142	19765	ENSRNOG00000043329(Rnf180),ENSRNOG00000028630(Ksr2),ENSRNOG00000010771(Pkd1),ENSRNOG00000000940(Flt1),ENSRNOG00000001662(Dyrk1a),	1.3736	0.324378	1
GO:0043231	intracellular membrane-bounded organelle	cellular_component	37	63	8461	19765	ENSRNOG00000006462(Ero1l),ENSRNOG00000009491(Phc3),ENSRNOG00000031760(Fmn1),ENSRNOG00000030245(Tango2),ENSRNOG00000006248(Trim37),ENSRNOG00000003258(Cdc73),ENSRNOG00000011849(Ndufs1),ENSRNOG00000009935(Xpo1),ENSRNOG00000001662(Dyrk1a),ENSRNOG00000006644(Kdm4c),ENSRNOG00000043329(Rnf180),ENSRNOG00000010800(Hadhb),ENSRNOG00000016680(Nsd1),ENSRNOG00000006340(Memo1),ENSRNOG00000007111(Nrd1),ENSRNOG00…	1.37194	0.0523675	1
GO:0015031	protein transport	biological_process	6	63	1376	19765	ENSRNOG00000007596(Rffl),ENSRNOG00000007921(Hnrnpm),ENSRNOG00000018778(Cadm1),ENSRNOG00000009935(Xpo1),ENSRNOG00000010771(Pkd1),ENSRNOG00000025539(Vps13a),	1.36801	0.310654	1
GO:0030554	adenyl nucleotide binding	molecular_function	6	63	1385	19765	ENSRNOG00000028630(Ksr2),ENSRNOG00000001662(Dyrk1a),ENSRNOG00000000940(Flt1),ENSRNOG00000004076(Pms1),ENSRNOG00000042519(Peak1),ENSRNOG00000055382(Hcn1),	1.35912	0.317758	1
GO:0043234	protein complex	cellular_component	15	63	3488	19765	ENSRNOG00000003258(Cdc73),ENSRNOG00000008145(Traf3),ENSRNOG00000009491(Phc3),ENSRNOG00000054294(Rprd2),ENSRNOG00000006248(Trim37),ENSRNOG00000003041(Smg6),ENSRNOG00000010800(Hadhb),ENSRNOG00000007596(Rffl),ENSRNOG00000023593(Upf2),ENSRNOG00000010771(Pkd1),ENSRNOG00000009935(Xpo1),ENSRNOG00000009700(Dync1i1),ENSRNOG00000000940(Flt1),ENSRNOG00000005411(Aftph),ENSRNOG00000011849(Ndufs1),	1.34918	0.199093	1
GO:0016310	phosphorylation	biological_process	8	63	1870	19765	ENSRNOG00000042519(Peak1),ENSRNOG00000016680(Nsd1),ENSRNOG00000011849(Ndufs1),ENSRNOG00000028630(Ksr2),ENSRNOG00000014856(Etnk1),ENSRNOG00000010771(Pkd1),ENSRNOG00000000940(Flt1),ENSRNOG00000001662(Dyrk1a),	1.34216	0.298739	1
GO:0032991	macromolecular complex	cellular_component	19	63	4469	19765	ENSRNOG00000006644(Kdm4c),ENSRNOG00000001662(Dyrk1a),ENSRNOG00000000940(Flt1),ENSRNOG00000009935(Xpo1),ENSRNOG00000011849(Ndufs1),ENSRNOG00000003258(Cdc73),ENSRNOG00000006248(Trim37),ENSRNOG00000009491(Phc3),ENSRNOG00000007921(Hnrnpm),ENSRNOG00000007596(Rffl),ENSRNOG00000010771(Pkd1),ENSRNOG00000023593(Upf2),ENSRNOG00000009700(Dync1i1),ENSRNOG00000005411(Aftph),ENSRNOG00000015389(Stag1),ENSRNOG00…	1.33383	0.174841	1
GO:0009790	embryo development	biological_process	4	63	946	19765	ENSRNOG00000010771(Pkd1),ENSRNOG00000006644(Kdm4c),ENSRNOG00000013281(Mib1),ENSRNOG00000003258(Cdc73),	1.32655	0.376243	1
GO:0006796	phosphate-containing compound metabolic process	biological_process	11	63	2606	19765	ENSRNOG00000042519(Peak1),ENSRNOG00000011849(Ndufs1),ENSRNOG00000014856(Etnk1),ENSRNOG00000010771(Pkd1),ENSRNOG00000016878(Lppr5),ENSRNOG00000001662(Dyrk1a),ENSRNOG00000000940(Flt1),ENSRNOG00000000312(Fig4),ENSRNOG00000016680(Nsd1),ENSRNOG00000028156(Pld1),ENSRNOG00000028630(Ksr2),	1.32426	0.271818	1
GO:0008104	protein localization	biological_process	8	63	1900	19765	ENSRNOG00000007596(Rffl),ENSRNOG00000015334(Fcho2),ENSRNOG00000018778(Cadm1),ENSRNOG00000007921(Hnrnpm),ENSRNOG00000055382(Hcn1),ENSRNOG00000009935(Xpo1),ENSRNOG00000010771(Pkd1),ENSRNOG00000025539(Vps13a),	1.32097	0.318551	1
GO:0005634	nucleus	cellular_component	22	63	5228	19765	ENSRNOG00000009491(Phc3),ENSRNOG00000031760(Fmn1),ENSRNOG00000006248(Trim37),ENSRNOG00000003258(Cdc73),ENSRNOG00000007921(Hnrnpm),ENSRNOG00000009935(Xpo1),ENSRNOG00000001662(Dyrk1a),ENSRNOG00000006644(Kdm4c),ENSRNOG00000054294(Rprd2),ENSRNOG00000019507(Hnrnpul2),ENSRNOG00000016680(Nsd1),ENSRNOG00000006340(Memo1),ENSRNOG00000003041(Smg6),ENSRNOG00000009700(Dync1i1),ENSRNOG00000010771(Pkd1),ENSRNOG…	1.32021	0.163814	1
GO:0043229	intracellular organelle	cellular_component	41	63	9754	19765	ENSRNOG00000022523(Fkbp5),ENSRNOG00000005411(Aftph),ENSRNOG00000042519(Peak1),ENSRNOG00000018778(Cadm1),ENSRNOG00000052814(Ankrd27),ENSRNOG00000009700(Dync1i1),ENSRNOG00000036866(Acer3),ENSRNOG00000010771(Pkd1),ENSRNOG00000010800(Hadhb),ENSRNOG00000006340(Memo1),ENSRNOG00000016680(Nsd1),ENSRNOG00000036658(Tbcd),ENSRNOG00000007111(Nrd1),ENSRNOG00000011849(Ndufs1),ENSRNOG00000001662(Dyrk1a),ENSRNOG…	1.31873	0.0718673	1
GO:0006793	phosphorus metabolic process	biological_process	11	63	2642	19765	ENSRNOG00000042519(Peak1),ENSRNOG00000011849(Ndufs1),ENSRNOG00000014856(Etnk1),ENSRNOG00000010771(Pkd1),ENSRNOG00000016878(Lppr5),ENSRNOG00000001662(Dyrk1a),ENSRNOG00000000940(Flt1),ENSRNOG00000016680(Nsd1),ENSRNOG00000000312(Fig4),ENSRNOG00000028156(Pld1),ENSRNOG00000028630(Ksr2),	1.30622	0.290612	1
GO:0030154	cell differentiation	biological_process	13	63	3139	19765	ENSRNOG00000017593(Mtr),ENSRNOG00000052814(Ankrd27),ENSRNOG00000006644(Kdm4c),ENSRNOG00000013884(Psd3),ENSRNOG00000005624(Zfx),ENSRNOG00000042519(Peak1),ENSRNOG00000031760(Fmn1),ENSRNOG00000013281(Mib1),ENSRNOG00000003258(Cdc73),ENSRNOG00000017883(Camsap1),ENSRNOG00000006462(Ero1l),ENSRNOG00000000312(Fig4),ENSRNOG00000055382(Hcn1),	1.2993	0.273023	1
GO:0048869	cellular developmental process	biological_process	14	63	3407	19765	ENSRNOG00000005624(Zfx),ENSRNOG00000042519(Peak1),ENSRNOG00000018778(Cadm1),ENSRNOG00000013884(Psd3),ENSRNOG00000006644(Kdm4c),ENSRNOG00000017593(Mtr),ENSRNOG00000052814(Ankrd27),ENSRNOG00000006462(Ero1l),ENSRNOG00000017883(Camsap1),ENSRNOG00000055382(Hcn1),ENSRNOG00000000312(Fig4),ENSRNOG00000013281(Mib1),ENSRNOG00000003258(Cdc73),ENSRNOG00000031760(Fmn1),	1.28918	0.273029	1
GO:0051130	positive regulation of cellular component organization	biological_process	4	63	975	19765	ENSRNOG00000000312(Fig4),ENSRNOG00000013281(Mib1),ENSRNOG00000052814(Ankrd27),ENSRNOG00000031760(Fmn1),	1.2871	0.407916	1
GO:0043227	membrane-bounded organelle	cellular_component	39	63	9541	19765	ENSRNOG00000000312(Fig4),ENSRNOG00000042978(Ncald),ENSRNOG00000007921(Hnrnpm),ENSRNOG00000015334(Fcho2),ENSRNOG00000007596(Rffl),ENSRNOG00000009170(Dmxl2),ENSRNOG00000019507(Hnrnpul2),ENSRNOG00000054294(Rprd2),ENSRNOG00000019776(Sh3gl3),ENSRNOG00000003041(Smg6),ENSRNOG00000028156(Pld1),ENSRNOG00000014856(Etnk1),ENSRNOG00000023593(Upf2),ENSRNOG00000015389(Stag1),ENSRNOG00000005624(Zfx),ENSRNOG0000…	1.28241	0.109478	1
GO:0006508	proteolysis	biological_process	6	63	1469	19765	ENSRNOG00000007596(Rffl),ENSRNOG00000007111(Nrd1),ENSRNOG00000010771(Pkd1),ENSRNOG00000026573(Ophn1),ENSRNOG00000008145(Traf3),ENSRNOG00000043329(Rnf180),	1.2814	0.387431	1
GO:0022607	cellular component assembly	biological_process	8	63	1961	19765	ENSRNOG00000031760(Fmn1),ENSRNOG00000006248(Trim37),ENSRNOG00000052814(Ankrd27),ENSRNOG00000036658(Tbcd),ENSRNOG00000028156(Pld1),ENSRNOG00000015334(Fcho2),ENSRNOG00000018778(Cadm1),ENSRNOG00000000312(Fig4),	1.27988	0.360705	1
GO:0000166	nucleotide binding	molecular_function	9	63	2213	19765	ENSRNOG00000004076(Pms1),ENSRNOG00000000940(Flt1),ENSRNOG00000001662(Dyrk1a),ENSRNOG00000042519(Peak1),ENSRNOG00000006718(Rbm33),ENSRNOG00000028630(Ksr2),ENSRNOG00000007921(Hnrnpm),ENSRNOG00000055382(Hcn1),ENSRNOG00000010800(Hadhb),	1.2759	0.351302	1
GO:0007275	multicellular organism development	biological_process	17	63	4181	19765	ENSRNOG00000017883(Camsap1),ENSRNOG00000005624(Zfx),ENSRNOG00000018778(Cadm1),ENSRNOG00000017593(Mtr),ENSRNOG00000052814(Ankrd27),ENSRNOG00000010771(Pkd1),ENSRNOG00000023593(Upf2),ENSRNOG00000006462(Ero1l),ENSRNOG00000055382(Hcn1),ENSRNOG00000000312(Fig4),ENSRNOG00000031760(Fmn1),ENSRNOG00000013281(Mib1),ENSRNOG00000003258(Cdc73),ENSRNOG00000013884(Psd3),ENSRNOG00000000940(Flt1),ENSRNOG0000000664…	1.27563	0.257885	1
GO:0045892	negative regulation of transcription, DNA-templated	biological_process	4	63	985	19765	ENSRNOG00000008145(Traf3),ENSRNOG00000003258(Cdc73),ENSRNOG00000009935(Xpo1),ENSRNOG00000006248(Trim37),	1.27403	0.419038	1
GO:0045893	positive regulation of transcription, DNA-templated	biological_process	5	63	1232	19765	ENSRNOG00000010771(Pkd1),ENSRNOG00000003258(Cdc73),ENSRNOG00000006248(Trim37),ENSRNOG00000016680(Nsd1),ENSRNOG00000015389(Stag1),	1.27326	0.408616	1
GO:0051247	positive regulation of protein metabolic process	biological_process	5	63	1233	19765	ENSRNOG00000000940(Flt1),ENSRNOG00000001662(Dyrk1a),ENSRNOG00000010771(Pkd1),ENSRNOG00000043329(Rnf180),ENSRNOG00000028630(Ksr2),	1.27222	0.409593	1
GO:0045184	establishment of protein localization	biological_process	6	63	1487	19765	ENSRNOG00000025539(Vps13a),ENSRNOG00000010771(Pkd1),ENSRNOG00000009935(Xpo1),ENSRNOG00000007921(Hnrnpm),ENSRNOG00000018778(Cadm1),ENSRNOG00000007596(Rffl),	1.26589	0.4031	1
GO:0010629	negative regulation of gene expression	biological_process	5	63	1240	19765	ENSRNOG00000008145(Traf3),ENSRNOG00000003258(Cdc73),ENSRNOG00000009935(Xpo1),ENSRNOG00000001662(Dyrk1a),ENSRNOG00000006248(Trim37),	1.26504	0.41646	1
GO:0031324	negative regulation of cellular metabolic process	biological_process	8	63	1993	19765	ENSRNOG00000006248(Trim37),ENSRNOG00000001662(Dyrk1a),ENSRNOG00000009935(Xpo1),ENSRNOG00000026573(Ophn1),ENSRNOG00000003258(Cdc73),ENSRNOG00000008145(Traf3),ENSRNOG00000006644(Kdm4c),ENSRNOG00000007596(Rffl),	1.25933	0.383769	1
GO:1902531	regulation of intracellular signal transduction	biological_process	5	63	1250	19765	ENSRNOG00000028630(Ksr2),ENSRNOG00000001662(Dyrk1a),ENSRNOG00000000940(Flt1),ENSRNOG00000013884(Psd3),ENSRNOG00000007596(Rffl),	1.25492	0.42634	1
GO:1903507	negative regulation of nucleic acid-templated transcription	biological_process	4	63	1002	19765	ENSRNOG00000009935(Xpo1),ENSRNOG00000006248(Trim37),ENSRNOG00000008145(Traf3),ENSRNOG00000003258(Cdc73),	1.25242	0.438166	1
GO:0044444	cytoplasmic part	cellular_component	24	63	6025	19765	ENSRNOG00000010800(Hadhb),ENSRNOG00000028156(Pld1),ENSRNOG00000006340(Memo1),ENSRNOG00000007111(Nrd1),ENSRNOG00000019776(Sh3gl3),ENSRNOG00000022523(Fkbp5),ENSRNOG00000018778(Cadm1),ENSRNOG00000005411(Aftph),ENSRNOG00000009700(Dync1i1),ENSRNOG00000052814(Ankrd27),ENSRNOG00000010771(Pkd1),ENSRNOG00000036866(Acer3),ENSRNOG00000007596(Rffl),ENSRNOG00000015334(Fcho2),ENSRNOG00000006462(Ero1l),ENSRNOG0…	1.24971	0.233071	1
GO:0006810	transport	biological_process	15	63	3776	19765	ENSRNOG00000007596(Rffl),ENSRNOG00000028156(Pld1),ENSRNOG00000015334(Fcho2),ENSRNOG00000006462(Ero1l),ENSRNOG00000007921(Hnrnpm),ENSRNOG00000055382(Hcn1),ENSRNOG00000019776(Sh3gl3),ENSRNOG00000013281(Mib1),ENSRNOG00000018778(Cadm1),ENSRNOG00000005411(Aftph),ENSRNOG00000009935(Xpo1),ENSRNOG00000052814(Ankrd27),ENSRNOG00000010771(Pkd1),ENSRNOG00000025539(Vps13a),ENSRNOG00000026573(Ophn1),	1.24628	0.317532	1
GO:0016477	cell migration	biological_process	4	63	1011	19765	ENSRNOG00000000940(Flt1),ENSRNOG00000007596(Rffl),ENSRNOG00000028156(Pld1),ENSRNOG00000042519(Peak1),	1.24127	0.4484	1
GO:1902679	negative regulation of RNA biosynthetic process	biological_process	4	63	1015	19765	ENSRNOG00000009935(Xpo1),ENSRNOG00000006248(Trim37),ENSRNOG00000008145(Traf3),ENSRNOG00000003258(Cdc73),	1.23638	0.452971	1
GO:0006468	protein phosphorylation	biological_process	6	63	1535	19765	ENSRNOG00000042519(Peak1),ENSRNOG00000016680(Nsd1),ENSRNOG00000000940(Flt1),ENSRNOG00000001662(Dyrk1a),ENSRNOG00000028630(Ksr2),ENSRNOG00000010771(Pkd1),	1.22631	0.446027	1
GO:0048523	negative regulation of cellular process	biological_process	14	63	3584	19765	ENSRNOG00000001662(Dyrk1a),ENSRNOG00000052814(Ankrd27),ENSRNOG00000009935(Xpo1),ENSRNOG00000026573(Ophn1),ENSRNOG00000006644(Kdm4c),ENSRNOG00000010771(Pkd1),ENSRNOG00000006248(Trim37),ENSRNOG00000036658(Tbcd),ENSRNOG00000008145(Traf3),ENSRNOG00000003258(Cdc73),ENSRNOG00000013281(Mib1),ENSRNOG00000007596(Rffl),ENSRNOG00000000312(Fig4),ENSRNOG00000006462(Ero1l),	1.22551	0.358237	1
GO:0042802	identical protein binding	molecular_function	4	63	1025	19765	ENSRNOG00000019776(Sh3gl3),ENSRNOG00000001662(Dyrk1a),ENSRNOG00000006248(Trim37),ENSRNOG00000055382(Hcn1),	1.22431	0.464457	1
GO:0005737	cytoplasm	cellular_component	33	63	8490	19765	ENSRNOG00000010800(Hadhb),ENSRNOG00000006340(Memo1),ENSRNOG00000007111(Nrd1),ENSRNOG00000022523(Fkbp5),ENSRNOG00000005411(Aftph),ENSRNOG00000018778(Cadm1),ENSRNOG00000042519(Peak1),ENSRNOG00000009700(Dync1i1),ENSRNOG00000052814(Ankrd27),ENSRNOG00000036866(Acer3),ENSRNOG00000010771(Pkd1),ENSRNOG00000006462(Ero1l),ENSRNOG00000030245(Tango2),ENSRNOG00000006248(Trim37),ENSRNOG00000031760(Fmn1),ENSRNO…	1.21945	0.22194	1
GO:0048856	anatomical structure development	biological_process	18	63	4660	19765	ENSRNOG00000017883(Camsap1),ENSRNOG00000017593(Mtr),ENSRNOG00000052814(Ankrd27),ENSRNOG00000023593(Upf2),ENSRNOG00000010771(Pkd1),ENSRNOG00000018778(Cadm1),ENSRNOG00000005624(Zfx),ENSRNOG00000042519(Peak1),ENSRNOG00000031760(Fmn1),ENSRNOG00000013281(Mib1),ENSRNOG00000003258(Cdc73),ENSRNOG00000006462(Ero1l),ENSRNOG00000000312(Fig4),ENSRNOG00000055382(Hcn1),ENSRNOG00000000940(Flt1),ENSRNOG000000066…	1.21183	0.341799	1
GO:0016020	membrane	cellular_component	35	63	9170	19765	ENSRNOG00000038436(RGD1307100),ENSRNOG00000036658(Tbcd),ENSRNOG00000056038(Ehbp1l1),ENSRNOG00000008145(Traf3),ENSRNOG00000010800(Hadhb),ENSRNOG00000013353(Tmem260),ENSRNOG00000016878(Lppr5),ENSRNOG00000052814(Ankrd27),ENSRNOG00000010771(Pkd1),ENSRNOG00000036866(Acer3),ENSRNOG00000022523(Fkbp5),ENSRNOG00000018778(Cadm1),ENSRNOG00000042519(Peak1),ENSRNOG00000005411(Aftph),ENSRNOG00000002126(Ncam2),…	1.19744	0.250421	1
GO:0006461	protein complex assembly	biological_process	4	63	1060	19765	ENSRNOG00000052814(Ankrd27),ENSRNOG00000036658(Tbcd),ENSRNOG00000031760(Fmn1),ENSRNOG00000015334(Fcho2),	1.18389	0.50528	1
GO:0005622	intracellular	cellular_component	45	63	11927	19765	ENSRNOG00000015389(Stag1),ENSRNOG00000005624(Zfx),ENSRNOG00000017593(Mtr),ENSRNOG00000014856(Etnk1),ENSRNOG00000023593(Upf2),ENSRNOG00000028156(Pld1),ENSRNOG00000003041(Smg6),ENSRNOG00000017883(Camsap1),ENSRNOG00000019776(Sh3gl3),ENSRNOG00000054294(Rprd2),ENSRNOG00000019507(Hnrnpul2),ENSRNOG00000009170(Dmxl2),ENSRNOG00000025539(Vps13a),ENSRNOG00000015334(Fcho2),ENSRNOG00000007596(Rffl),ENSRNOG000…	1.18369	0.229869	1
GO:0060341	regulation of cellular localization	biological_process	4	63	1063	19765	ENSRNOG00000009935(Xpo1),ENSRNOG00000010771(Pkd1),ENSRNOG00000007921(Hnrnpm),ENSRNOG00000018778(Cadm1),	1.18055	0.50882	1
GO:0031325	positive regulation of cellular metabolic process	biological_process	9	63	2411	19765	ENSRNOG00000015389(Stag1),ENSRNOG00000001662(Dyrk1a),ENSRNOG00000000940(Flt1),ENSRNOG00000010771(Pkd1),ENSRNOG00000043329(Rnf180),ENSRNOG00000016680(Nsd1),ENSRNOG00000006248(Trim37),ENSRNOG00000003258(Cdc73),ENSRNOG00000028630(Ksr2),	1.17112	0.491519	1
GO:0005524	ATP binding	molecular_function	5	63	1353	19765	ENSRNOG00000042519(Peak1),ENSRNOG00000028630(Ksr2),ENSRNOG00000000940(Flt1),ENSRNOG00000001662(Dyrk1a),ENSRNOG00000004076(Pms1),	1.15939	0.5323	1
GO:0009605	response to external stimulus	biological_process	7	63	1900	19765	ENSRNOG00000052814(Ankrd27),ENSRNOG00000000940(Flt1),ENSRNOG00000003258(Cdc73),ENSRNOG00000008145(Traf3),ENSRNOG00000010771(Pkd1),ENSRNOG00000028156(Pld1),ENSRNOG00000007921(Hnrnpm),	1.15585	0.528877	1
GO:0009892	negative regulation of metabolic process	biological_process	8	63	2183	19765	ENSRNOG00000009935(Xpo1),ENSRNOG00000001662(Dyrk1a),ENSRNOG00000006644(Kdm4c),ENSRNOG00000026573(Ophn1),ENSRNOG00000007596(Rffl),ENSRNOG00000006248(Trim37),ENSRNOG00000003258(Cdc73),ENSRNOG00000008145(Traf3),	1.14972	0.532207	1
GO:0001932	regulation of protein phosphorylation	biological_process	4	63	1092	19765	ENSRNOG00000016680(Nsd1),ENSRNOG00000028630(Ksr2),ENSRNOG00000010771(Pkd1),ENSRNOG00000000940(Flt1),	1.14919	0.543341	1
GO:0048870	cell motility	biological_process	4	63	1098	19765	ENSRNOG00000000940(Flt1),ENSRNOG00000028156(Pld1),ENSRNOG00000007596(Rffl),ENSRNOG00000042519(Peak1),	1.14291	0.550545	1
GO:0019538	protein metabolic process	biological_process	18	63	4955	19765	ENSRNOG00000010771(Pkd1),ENSRNOG00000042519(Peak1),ENSRNOG00000022523(Fkbp5),ENSRNOG00000008145(Traf3),ENSRNOG00000007111(Nrd1),ENSRNOG00000016680(Nsd1),ENSRNOG00000006644(Kdm4c),ENSRNOG00000026573(Ophn1),ENSRNOG00000043329(Rnf180),ENSRNOG00000009935(Xpo1),ENSRNOG00000000940(Flt1),ENSRNOG00000001662(Dyrk1a),ENSRNOG00000013281(Mib1),ENSRNOG00000028630(Ksr2),ENSRNOG00000003258(Cdc73),ENSRNOG0000000…	1.13969	0.48261	1
GO:0032502	developmental process	biological_process	18	63	4964	19765	ENSRNOG00000017883(Camsap1),ENSRNOG00000023593(Upf2),ENSRNOG00000010771(Pkd1),ENSRNOG00000052814(Ankrd27),ENSRNOG00000017593(Mtr),ENSRNOG00000018778(Cadm1),ENSRNOG00000005624(Zfx),ENSRNOG00000042519(Peak1),ENSRNOG00000003258(Cdc73),ENSRNOG00000013281(Mib1),ENSRNOG00000031760(Fmn1),ENSRNOG00000000312(Fig4),ENSRNOG00000055382(Hcn1),ENSRNOG00000006462(Ero1l),ENSRNOG00000026573(Ophn1),ENSRNOG00000006…	1.13762	0.48725	1
GO:0045595	regulation of cell differentiation	biological_process	5	63	1379	19765	ENSRNOG00000052814(Ankrd27),ENSRNOG00000006644(Kdm4c),ENSRNOG00000013281(Mib1),ENSRNOG00000003258(Cdc73),ENSRNOG00000000312(Fig4),	1.13753	0.560055	1
GO:0006928	movement of cell or subcellular component	biological_process	5	63	1390	19765	ENSRNOG00000000940(Flt1),ENSRNOG00000009700(Dync1i1),ENSRNOG00000007596(Rffl),ENSRNOG00000028156(Pld1),ENSRNOG00000042519(Peak1),	1.12853	0.571895	1
GO:0010557	positive regulation of macromolecule biosynthetic process	biological_process	5	63	1395	19765	ENSRNOG00000010771(Pkd1),ENSRNOG00000003258(Cdc73),ENSRNOG00000006248(Trim37),ENSRNOG00000016680(Nsd1),ENSRNOG00000015389(Stag1),	1.12448	0.577295	1
GO:0051252	regulation of RNA metabolic process	biological_process	10	63	2791	19765	ENSRNOG00000001662(Dyrk1a),ENSRNOG00000009935(Xpo1),ENSRNOG00000010771(Pkd1),ENSRNOG00000015389(Stag1),ENSRNOG00000005624(Zfx),ENSRNOG00000001064(Sbno1),ENSRNOG00000006248(Trim37),ENSRNOG00000003258(Cdc73),ENSRNOG00000008145(Traf3),ENSRNOG00000016680(Nsd1),	1.12408	0.564705	1
GO:0050793	regulation of developmental process	biological_process	7	63	1954	19765	ENSRNOG00000000312(Fig4),ENSRNOG00000017883(Camsap1),ENSRNOG00000003258(Cdc73),ENSRNOG00000013281(Mib1),ENSRNOG00000006644(Kdm4c),ENSRNOG00000052814(Ankrd27),ENSRNOG00000000940(Flt1),	1.12391	0.577258	1
GO:0046483	heterocycle metabolic process	biological_process	16	63	4501	19765	ENSRNOG00000006248(Trim37),ENSRNOG00000001064(Sbno1),ENSRNOG00000003258(Cdc73),ENSRNOG00000006462(Ero1l),ENSRNOG00000007921(Hnrnpm),ENSRNOG00000001662(Dyrk1a),ENSRNOG00000009935(Xpo1),ENSRNOG00000043329(Rnf180),ENSRNOG00000011849(Ndufs1),ENSRNOG00000008145(Traf3),ENSRNOG00000003041(Smg6),ENSRNOG00000016680(Nsd1),ENSRNOG00000017593(Mtr),ENSRNOG00000010771(Pkd1),ENSRNOG00000015389(Stag1),ENSRNOG000…	1.11524	0.550651	1
GO:0019222	regulation of metabolic process	biological_process	19	63	5370	19765	ENSRNOG00000006644(Kdm4c),ENSRNOG00000026573(Ophn1),ENSRNOG00000043329(Rnf180),ENSRNOG00000009935(Xpo1),ENSRNOG00000001662(Dyrk1a),ENSRNOG00000000940(Flt1),ENSRNOG00000013884(Psd3),ENSRNOG00000028630(Ksr2),ENSRNOG00000003258(Cdc73),ENSRNOG00000001064(Sbno1),ENSRNOG00000006248(Trim37),ENSRNOG00000007596(Rffl),ENSRNOG00000010771(Pkd1),ENSRNOG00000052814(Ankrd27),ENSRNOG00000005624(Zfx),ENSRNOG00000…	1.11003	0.54748	1
GO:0016070	RNA metabolic process	biological_process	12	63	3430	19765	ENSRNOG00000001662(Dyrk1a),ENSRNOG00000009935(Xpo1),ENSRNOG00000010771(Pkd1),ENSRNOG00000015389(Stag1),ENSRNOG00000005624(Zfx),ENSRNOG00000001064(Sbno1),ENSRNOG00000006248(Trim37),ENSRNOG00000008145(Traf3),ENSRNOG00000003258(Cdc73),ENSRNOG00000003041(Smg6),ENSRNOG00000016680(Nsd1),ENSRNOG00000007921(Hnrnpm),	1.0976	0.609042	1
GO:0044267	cellular protein metabolic process	biological_process	15	63	4291	19765	ENSRNOG00000000940(Flt1),ENSRNOG00000001662(Dyrk1a),ENSRNOG00000006644(Kdm4c),ENSRNOG00000043329(Rnf180),ENSRNOG00000026573(Ophn1),ENSRNOG00000007596(Rffl),ENSRNOG00000006248(Trim37),ENSRNOG00000013281(Mib1),ENSRNOG00000003258(Cdc73),ENSRNOG00000028630(Ksr2),ENSRNOG00000022523(Fkbp5),ENSRNOG00000042519(Peak1),ENSRNOG00000010771(Pkd1),ENSRNOG00000016680(Nsd1),ENSRNOG00000008145(Traf3),	1.0967	0.599279	1
GO:0044237	cellular metabolic process	biological_process	30	63	8643	19765	ENSRNOG00000028630(Ksr2),ENSRNOG00000007596(Rffl),ENSRNOG00000007921(Hnrnpm),ENSRNOG00000000312(Fig4),ENSRNOG00000000940(Flt1),ENSRNOG00000028156(Pld1),ENSRNOG00000003041(Smg6),ENSRNOG00000017593(Mtr),ENSRNOG00000014856(Etnk1),ENSRNOG00000005624(Zfx),ENSRNOG00000015389(Stag1),ENSRNOG00000001064(Sbno1),ENSRNOG00000006248(Trim37),ENSRNOG00000013281(Mib1),ENSRNOG00000003258(Cdc73),ENSRNOG00000006462…	1.08896	0.560199	1
GO:0008152	metabolic process	biological_process	37	63	10679	19765	ENSRNOG00000000940(Flt1),ENSRNOG00000000312(Fig4),ENSRNOG00000007921(Hnrnpm),ENSRNOG00000007596(Rffl),ENSRNOG00000028630(Ksr2),ENSRNOG00000008872(Tmem68),ENSRNOG00000015389(Stag1),ENSRNOG00000005624(Zfx),ENSRNOG00000014856(Etnk1),ENSRNOG00000017593(Mtr),ENSRNOG00000003041(Smg6),ENSRNOG00000028156(Pld1),ENSRNOG00000060561(Gdpd1),ENSRNOG00000011849(Ndufs1),ENSRNOG00000013884(Psd3),ENSRNOG0000002657…	1.08699	0.541587	1
GO:0017076	purine nucleotide binding	molecular_function	6	63	1733	19765	ENSRNOG00000000940(Flt1),ENSRNOG00000001662(Dyrk1a),ENSRNOG00000004076(Pms1),ENSRNOG00000028630(Ksr2),ENSRNOG00000042519(Peak1),ENSRNOG00000055382(Hcn1),	1.0862	0.636673	1
GO:0005623	cell	cellular_component	51	63	14844	19765	ENSRNOG00000000940(Flt1),ENSRNOG00000025539(Vps13a),ENSRNOG00000009771(Cdh10),ENSRNOG00000009170(Dmxl2),ENSRNOG00000028630(Ksr2),ENSRNOG00000015334(Fcho2),ENSRNOG00000007596(Rffl),ENSRNOG00000000312(Fig4),ENSRNOG00000055382(Hcn1),ENSRNOG00000007921(Hnrnpm),ENSRNOG00000042978(Ncald),ENSRNOG00000017593(Mtr),ENSRNOG00000023593(Upf2),ENSRNOG00000014856(Etnk1),ENSRNOG00000015389(Stag1),ENSRNOG00000005…	1.07789	0.53366	1
GO:0097367	carbohydrate derivative binding	molecular_function	7	63	2040	19765	ENSRNOG00000042519(Peak1),ENSRNOG00000055382(Hcn1),ENSRNOG00000015334(Fcho2),ENSRNOG00000028630(Ksr2),ENSRNOG00000001662(Dyrk1a),ENSRNOG00000000940(Flt1),ENSRNOG00000004076(Pms1),	1.07653	0.65635	1
GO:0007049	cell cycle	biological_process	4	63	1167	19765	ENSRNOG00000003258(Cdc73),ENSRNOG00000010771(Pkd1),ENSRNOG00000006248(Trim37),ENSRNOG00000009935(Xpo1),	1.07534	0.634599	1
GO:1901360	organic cyclic compound metabolic process	biological_process	16	63	4682	19765	ENSRNOG00000010771(Pkd1),ENSRNOG00000017593(Mtr),ENSRNOG00000005624(Zfx),ENSRNOG00000015389(Stag1),ENSRNOG00000008145(Traf3),ENSRNOG00000016680(Nsd1),ENSRNOG00000003041(Smg6),ENSRNOG00000043329(Rnf180),ENSRNOG00000009935(Xpo1),ENSRNOG00000001662(Dyrk1a),ENSRNOG00000011849(Ndufs1),ENSRNOG00000003258(Cdc73),ENSRNOG00000006248(Trim37),ENSRNOG00000001064(Sbno1),ENSRNOG00000006462(Ero1l),ENSRNOG000000…	1.07212	0.658063	1
GO:0010467	gene expression	biological_process	15	63	4424	19765	ENSRNOG00000007921(Hnrnpm),ENSRNOG00000006462(Ero1l),ENSRNOG00000031760(Fmn1),ENSRNOG00000001064(Sbno1),ENSRNOG00000006248(Trim37),ENSRNOG00000003258(Cdc73),ENSRNOG00000009935(Xpo1),ENSRNOG00000001662(Dyrk1a),ENSRNOG00000006644(Kdm4c),ENSRNOG00000016680(Nsd1),ENSRNOG00000007111(Nrd1),ENSRNOG00000008145(Traf3),ENSRNOG00000005624(Zfx),ENSRNOG00000015389(Stag1),ENSRNOG00000010771(Pkd1),	1.06373	0.682309	1
GO:0010468	regulation of gene expression	biological_process	11	63	3247	19765	ENSRNOG00000015389(Stag1),ENSRNOG00000005624(Zfx),ENSRNOG00000006644(Kdm4c),ENSRNOG00000010771(Pkd1),ENSRNOG00000001662(Dyrk1a),ENSRNOG00000009935(Xpo1),ENSRNOG00000016680(Nsd1),ENSRNOG00000003258(Cdc73),ENSRNOG00000008145(Traf3),ENSRNOG00000006248(Trim37),ENSRNOG00000001064(Sbno1),	1.06284	0.6882	1
GO:0031323	regulation of cellular metabolic process	biological_process	16	63	4735	19765	ENSRNOG00000016680(Nsd1),ENSRNOG00000008145(Traf3),ENSRNOG00000005624(Zfx),ENSRNOG00000015389(Stag1),ENSRNOG00000010771(Pkd1),ENSRNOG00000007596(Rffl),ENSRNOG00000001064(Sbno1),ENSRNOG00000006248(Trim37),ENSRNOG00000028630(Ksr2),ENSRNOG00000003258(Cdc73),ENSRNOG00000009935(Xpo1),ENSRNOG00000001662(Dyrk1a),ENSRNOG00000000940(Flt1),ENSRNOG00000006644(Kdm4c),ENSRNOG00000026573(Ophn1),ENSRNOG00000043…	1.06012	0.690483	1
GO:0006355	regulation of transcription, DNA-templated	biological_process	9	63	2664	19765	ENSRNOG00000016680(Nsd1),ENSRNOG00000006248(Trim37),ENSRNOG00000001064(Sbno1),ENSRNOG00000003258(Cdc73),ENSRNOG00000008145(Traf3),ENSRNOG00000015389(Stag1),ENSRNOG00000005624(Zfx),ENSRNOG00000009935(Xpo1),ENSRNOG00000010771(Pkd1),	1.0599	0.692849	1
GO:0042325	regulation of phosphorylation	biological_process	4	63	1185	19765	ENSRNOG00000016680(Nsd1),ENSRNOG00000000940(Flt1),ENSRNOG00000028630(Ksr2),ENSRNOG00000010771(Pkd1),	1.059	0.656802	1
GO:0010628	positive regulation of gene expression	biological_process	5	63	1485	19765	ENSRNOG00000006248(Trim37),ENSRNOG00000003258(Cdc73),ENSRNOG00000010771(Pkd1),ENSRNOG00000015389(Stag1),ENSRNOG00000016680(Nsd1),	1.05633	0.675991	1
GO:1903506	regulation of nucleic acid-templated transcription	biological_process	9	63	2685	19765	ENSRNOG00000005624(Zfx),ENSRNOG00000015389(Stag1),ENSRNOG00000009935(Xpo1),ENSRNOG00000010771(Pkd1),ENSRNOG00000016680(Nsd1),ENSRNOG00000001064(Sbno1),ENSRNOG00000006248(Trim37),ENSRNOG00000008145(Traf3),ENSRNOG00000003258(Cdc73),	1.05161	0.710235	1
GO:2001141	regulation of RNA biosynthetic process	biological_process	9	63	2691	19765	ENSRNOG00000016680(Nsd1),ENSRNOG00000003258(Cdc73),ENSRNOG00000008145(Traf3),ENSRNOG00000001064(Sbno1),ENSRNOG00000006248(Trim37),ENSRNOG00000015389(Stag1),ENSRNOG00000005624(Zfx),ENSRNOG00000010771(Pkd1),ENSRNOG00000009935(Xpo1),	1.04926	0.715214	1
GO:0006725	cellular aromatic compound metabolic process	biological_process	15	63	4528	19765	ENSRNOG00000007921(Hnrnpm),ENSRNOG00000003258(Cdc73),ENSRNOG00000001064(Sbno1),ENSRNOG00000006248(Trim37),ENSRNOG00000011849(Ndufs1),ENSRNOG00000043329(Rnf180),ENSRNOG00000001662(Dyrk1a),ENSRNOG00000009935(Xpo1),ENSRNOG00000003041(Smg6),ENSRNOG00000016680(Nsd1),ENSRNOG00000008145(Traf3),ENSRNOG00000015389(Stag1),ENSRNOG00000005624(Zfx),ENSRNOG00000010771(Pkd1),ENSRNOG00000017593(Mtr),	1.0393	0.748864	1
GO:0031328	positive regulation of cellular biosynthetic process	biological_process	5	63	1513	19765	ENSRNOG00000015389(Stag1),ENSRNOG00000016680(Nsd1),ENSRNOG00000003258(Cdc73),ENSRNOG00000010771(Pkd1),ENSRNOG00000006248(Trim37),	1.03678	0.707106	1
GO:0003723	RNA binding	molecular_function	5	63	1518	19765	ENSRNOG00000007921(Hnrnpm),ENSRNOG00000010800(Hadhb),ENSRNOG00000006718(Rbm33),ENSRNOG00000023593(Upf2),ENSRNOG00000009935(Xpo1),	1.03337	0.712675	1
GO:0006351	transcription, DNA-templated	biological_process	9	63	2749	19765	ENSRNOG00000001064(Sbno1),ENSRNOG00000006248(Trim37),ENSRNOG00000003258(Cdc73),ENSRNOG00000008145(Traf3),ENSRNOG00000016680(Nsd1),ENSRNOG00000009935(Xpo1),ENSRNOG00000010771(Pkd1),ENSRNOG00000005624(Zfx),ENSRNOG00000015389(Stag1),	1.02713	0.76355	1
GO:0006357	regulation of transcription from RNA polymerase II promoter	biological_process	5	63	1529	19765	ENSRNOG00000009935(Xpo1),ENSRNOG00000006248(Trim37),ENSRNOG00000010771(Pkd1),ENSRNOG00000003258(Cdc73),ENSRNOG00000015389(Stag1),	1.02593	0.724935	1
GO:0050794	regulation of cellular process	biological_process	32	63	9840	19765	ENSRNOG00000006462(Ero1l),ENSRNOG00000001064(Sbno1),ENSRNOG00000006248(Trim37),ENSRNOG00000031760(Fmn1),ENSRNOG00000003258(Cdc73),ENSRNOG00000017406(Atrnl1),ENSRNOG00000013281(Mib1),ENSRNOG00000013884(Psd3),ENSRNOG00000001662(Dyrk1a),ENSRNOG00000009935(Xpo1),ENSRNOG00000026573(Ophn1),ENSRNOG00000043329(Rnf180),ENSRNOG00000006644(Kdm4c),ENSRNOG00000006340(Memo1),ENSRNOG00000016680(Nsd1),ENSRNOG000…	1.02026	0.817721	1
GO:0070062	extracellular exosome	cellular_component	7	63	2156	19765	ENSRNOG00000018778(Cadm1),ENSRNOG00000022523(Fkbp5),ENSRNOG00000010771(Pkd1),ENSRNOG00000007921(Hnrnpm),ENSRNOG00000042978(Ncald),ENSRNOG00000010800(Hadhb),ENSRNOG00000019776(Sh3gl3),	1.0186	0.765494	1
GO:0032774	RNA biosynthetic process	biological_process	9	63	2786	19765	ENSRNOG00000010771(Pkd1),ENSRNOG00000009935(Xpo1),ENSRNOG00000015389(Stag1),ENSRNOG00000005624(Zfx),ENSRNOG00000008145(Traf3),ENSRNOG00000003258(Cdc73),ENSRNOG00000006248(Trim37),ENSRNOG00000001064(Sbno1),ENSRNOG00000016680(Nsd1),	1.01349	0.794522	1
GO:1903561	extracellular vesicle	cellular_component	7	63	2169	19765	ENSRNOG00000010771(Pkd1),ENSRNOG00000022523(Fkbp5),ENSRNOG00000018778(Cadm1),ENSRNOG00000019776(Sh3gl3),ENSRNOG00000010800(Hadhb),ENSRNOG00000042978(Ncald),ENSRNOG00000007921(Hnrnpm),	1.0125	0.777813	1
GO:0006139	nucleobase-containing compound metabolic process	biological_process	14	63	4372	19765	ENSRNOG00000008145(Traf3),ENSRNOG00000016680(Nsd1),ENSRNOG00000003041(Smg6),ENSRNOG00000010771(Pkd1),ENSRNOG00000017593(Mtr),ENSRNOG00000005624(Zfx),ENSRNOG00000015389(Stag1),ENSRNOG00000003258(Cdc73),ENSRNOG00000001064(Sbno1),ENSRNOG00000006248(Trim37),ENSRNOG00000007921(Hnrnpm),ENSRNOG00000009935(Xpo1),ENSRNOG00000001662(Dyrk1a),ENSRNOG00000011849(Ndufs1),	1.00463	0.84616	1
GO:0009890	negative regulation of biosynthetic process	biological_process	4	63	1250	19765	ENSRNOG00000006248(Trim37),ENSRNOG00000009935(Xpo1),ENSRNOG00000008145(Traf3),ENSRNOG00000003258(Cdc73),	1.00394	0.737451	1
GO:0006366	transcription from RNA polymerase II promoter	biological_process	5	63	1577	19765	ENSRNOG00000006248(Trim37),ENSRNOG00000009935(Xpo1),ENSRNOG00000003258(Cdc73),ENSRNOG00000010771(Pkd1),ENSRNOG00000015389(Stag1),	0.994706	1	1
GO:0040011	locomotion	biological_process	4	63	1267	19765	ENSRNOG00000042519(Peak1),ENSRNOG00000007596(Rffl),ENSRNOG00000028156(Pld1),ENSRNOG00000000940(Flt1),	0.990466	1	1
GO:0009888	tissue development	biological_process	5	63	1598	19765	ENSRNOG00000055382(Hcn1),ENSRNOG00000031760(Fmn1),ENSRNOG00000013281(Mib1),ENSRNOG00000010771(Pkd1),ENSRNOG00000003258(Cdc73),	0.981634	1	1
GO:0005887	integral component of plasma membrane	cellular_component	4	63	1281	19765	ENSRNOG00000055382(Hcn1),ENSRNOG00000016878(Lppr5),ENSRNOG00000000940(Flt1),ENSRNOG00000008145(Traf3),	0.979641	1	1
GO:0097159	organic cyclic compound binding	molecular_function	17	63	5528	19765	ENSRNOG00000028630(Ksr2),ENSRNOG00000007921(Hnrnpm),ENSRNOG00000055382(Hcn1),ENSRNOG00000002112(Zfp644),ENSRNOG00000009935(Xpo1),ENSRNOG00000000940(Flt1),ENSRNOG00000001662(Dyrk1a),ENSRNOG00000004076(Pms1),ENSRNOG00000006718(Rbm33),ENSRNOG00000016680(Nsd1),ENSRNOG00000003041(Smg6),ENSRNOG00000010800(Hadhb),ENSRNOG00000023593(Upf2),ENSRNOG00000017593(Mtr),ENSRNOG00000005624(Zfx),ENSRNOG00000042519…	0.9648	1	1
GO:0048513	animal organ development	biological_process	9	63	2933	19765	ENSRNOG00000005624(Zfx),ENSRNOG00000018778(Cadm1),ENSRNOG00000010771(Pkd1),ENSRNOG00000023593(Upf2),ENSRNOG00000006462(Ero1l),ENSRNOG00000055382(Hcn1),ENSRNOG00000031760(Fmn1),ENSRNOG00000013281(Mib1),ENSRNOG00000003258(Cdc73),	0.962691	1	1
GO:0005102	receptor binding	molecular_function	4	63	1309	19765	ENSRNOG00000008145(Traf3),ENSRNOG00000026573(Ophn1),ENSRNOG00000006248(Trim37),ENSRNOG00000016680(Nsd1),	0.958687	1	1
GO:0006807	nitrogen compound metabolic process	biological_process	17	63	5567	19765	ENSRNOG00000005624(Zfx),ENSRNOG00000015389(Stag1),ENSRNOG00000017593(Mtr),ENSRNOG00000010771(Pkd1),ENSRNOG00000036866(Acer3),ENSRNOG00000016680(Nsd1),ENSRNOG00000003041(Smg6),ENSRNOG00000008145(Traf3),ENSRNOG00000011849(Ndufs1),ENSRNOG00000009935(Xpo1),ENSRNOG00000001662(Dyrk1a),ENSRNOG00000043329(Rnf180),ENSRNOG00000006462(Ero1l),ENSRNOG00000007921(Hnrnpm),ENSRNOG00000006248(Trim37),ENSRNOG00000…	0.958041	1	1
GO:0051171	regulation of nitrogen compound metabolic process	biological_process	10	63	3301	19765	ENSRNOG00000001662(Dyrk1a),ENSRNOG00000009935(Xpo1),ENSRNOG00000010771(Pkd1),ENSRNOG00000015389(Stag1),ENSRNOG00000005624(Zfx),ENSRNOG00000001064(Sbno1),ENSRNOG00000006248(Trim37),ENSRNOG00000008145(Traf3),ENSRNOG00000003258(Cdc73),ENSRNOG00000016680(Nsd1),	0.950409	1	1
GO:0016787	hydrolase activity	molecular_function	7	63	2311	19765	ENSRNOG00000036866(Acer3),ENSRNOG00000016878(Lppr5),ENSRNOG00000060561(Gdpd1),ENSRNOG00000007111(Nrd1),ENSRNOG00000000312(Fig4),ENSRNOG00000003041(Smg6),ENSRNOG00000028156(Pld1),	0.950286	1	1
GO:0005886	plasma membrane	cellular_component	14	63	4654	19765	ENSRNOG00000009771(Cdh10),ENSRNOG00000000940(Flt1),ENSRNOG00000028630(Ksr2),ENSRNOG00000055382(Hcn1),ENSRNOG00000007596(Rffl),ENSRNOG00000015334(Fcho2),ENSRNOG00000010771(Pkd1),ENSRNOG00000014856(Etnk1),ENSRNOG00000052814(Ankrd27),ENSRNOG00000016878(Lppr5),ENSRNOG00000042519(Peak1),ENSRNOG00000008145(Traf3),ENSRNOG00000036658(Tbcd),ENSRNOG00000028156(Pld1),	0.943752	1	1
GO:0031226	intrinsic component of plasma membrane	cellular_component	4	63	1330	19765	ENSRNOG00000055382(Hcn1),ENSRNOG00000016878(Lppr5),ENSRNOG00000000940(Flt1),ENSRNOG00000008145(Traf3),	0.943549	1	1
GO:0042592	homeostatic process	biological_process	4	63	1347	19765	ENSRNOG00000005624(Zfx),ENSRNOG00000006462(Ero1l),ENSRNOG00000003041(Smg6),ENSRNOG00000010771(Pkd1),	0.931641	1	1
GO:0023051	regulation of signaling	biological_process	7	63	2376	19765	ENSRNOG00000007596(Rffl),ENSRNOG00000003258(Cdc73),ENSRNOG00000028630(Ksr2),ENSRNOG00000013884(Psd3),ENSRNOG00000026573(Ophn1),ENSRNOG00000001662(Dyrk1a),ENSRNOG00000000940(Flt1),	0.924289	1	1
GO:0071944	cell periphery	cellular_component	14	63	4763	19765	ENSRNOG00000009771(Cdh10),ENSRNOG00000000940(Flt1),ENSRNOG00000028630(Ksr2),ENSRNOG00000055382(Hcn1),ENSRNOG00000015334(Fcho2),ENSRNOG00000007596(Rffl),ENSRNOG00000014856(Etnk1),ENSRNOG00000010771(Pkd1),ENSRNOG00000016878(Lppr5),ENSRNOG00000052814(Ankrd27),ENSRNOG00000042519(Peak1),ENSRNOG00000008145(Traf3),ENSRNOG00000036658(Tbcd),ENSRNOG00000028156(Pld1),	0.922155	1	1
GO:0001883	purine nucleoside binding	molecular_function	5	63	1703	19765	ENSRNOG00000028630(Ksr2),ENSRNOG00000004076(Pms1),ENSRNOG00000001662(Dyrk1a),ENSRNOG00000000940(Flt1),ENSRNOG00000042519(Peak1),	0.92111	1	1
GO:0032549	ribonucleoside binding	molecular_function	5	63	1703	19765	ENSRNOG00000042519(Peak1),ENSRNOG00000001662(Dyrk1a),ENSRNOG00000000940(Flt1),ENSRNOG00000004076(Pms1),ENSRNOG00000028630(Ksr2),	0.92111	1	1
GO:0071310	cellular response to organic substance	biological_process	5	63	1705	19765	ENSRNOG00000003258(Cdc73),ENSRNOG00000000940(Flt1),ENSRNOG00000006462(Ero1l),ENSRNOG00000007921(Hnrnpm),ENSRNOG00000007596(Rffl),	0.92003	1	1
GO:0001882	nucleoside binding	molecular_function	5	63	1709	19765	ENSRNOG00000042519(Peak1),ENSRNOG00000028630(Ksr2),ENSRNOG00000004076(Pms1),ENSRNOG00000000940(Flt1),ENSRNOG00000001662(Dyrk1a),	0.917876	1	1
GO:0009987	cellular process	biological_process	43	63	14786	19765	ENSRNOG00000000940(Flt1),ENSRNOG00000025539(Vps13a),ENSRNOG00000028630(Ksr2),ENSRNOG00000015334(Fcho2),ENSRNOG00000007596(Rffl),ENSRNOG00000000312(Fig4),ENSRNOG00000055382(Hcn1),ENSRNOG00000007921(Hnrnpm),ENSRNOG00000042978(Ncald),ENSRNOG00000017593(Mtr),ENSRNOG00000014856(Etnk1),ENSRNOG00000015389(Stag1),ENSRNOG00000005624(Zfx),ENSRNOG00000028156(Pld1),ENSRNOG00000003041(Smg6),ENSRNOG00000017883…	0.912376	1	1
GO:0010646	regulation of cell communication	biological_process	7	63	2414	19765	ENSRNOG00000003258(Cdc73),ENSRNOG00000028630(Ksr2),ENSRNOG00000007596(Rffl),ENSRNOG00000000940(Flt1),ENSRNOG00000001662(Dyrk1a),ENSRNOG00000026573(Ophn1),ENSRNOG00000013884(Psd3),	0.909739	1	1
GO:0009966	regulation of signal transduction	biological_process	6	63	2073	19765	ENSRNOG00000003258(Cdc73),ENSRNOG00000028630(Ksr2),ENSRNOG00000007596(Rffl),ENSRNOG00000000940(Flt1),ENSRNOG00000001662(Dyrk1a),ENSRNOG00000013884(Psd3),	0.908047	1	1
GO:0051174	regulation of phosphorus metabolic process	biological_process	4	63	1405	19765	ENSRNOG00000000940(Flt1),ENSRNOG00000010771(Pkd1),ENSRNOG00000028630(Ksr2),ENSRNOG00000016680(Nsd1),	0.893182	1	1
GO:0003676	nucleic acid binding	molecular_function	10	63	3598	19765	ENSRNOG00000010800(Hadhb),ENSRNOG00000002112(Zfp644),ENSRNOG00000016680(Nsd1),ENSRNOG00000007921(Hnrnpm),ENSRNOG00000003041(Smg6),ENSRNOG00000009935(Xpo1),ENSRNOG00000004076(Pms1),ENSRNOG00000023593(Upf2),ENSRNOG00000006718(Rbm33),ENSRNOG00000005624(Zfx),	0.871957	1	1
GO:0006915	apoptotic process	biological_process	4	63	1450	19765	ENSRNOG00000008145(Traf3),ENSRNOG00000007596(Rffl),ENSRNOG00000011849(Ndufs1),ENSRNOG00000006462(Ero1l),	0.865463	1	1
GO:0012501	programmed cell death	biological_process	4	63	1476	19765	ENSRNOG00000008145(Traf3),ENSRNOG00000011849(Ndufs1),ENSRNOG00000007596(Rffl),ENSRNOG00000006462(Ero1l),	0.850217	1	1
GO:0005739	mitochondrion	cellular_component	4	63	1506	19765	ENSRNOG00000030245(Tango2),ENSRNOG00000007111(Nrd1),ENSRNOG00000010800(Hadhb),ENSRNOG00000011849(Ndufs1),	0.833281	1	1
GO:0007165	signal transduction	biological_process	15	63	5670	19765	ENSRNOG00000028156(Pld1),ENSRNOG00000008145(Traf3),ENSRNOG00000010771(Pkd1),ENSRNOG00000016878(Lppr5),ENSRNOG00000006462(Ero1l),ENSRNOG00000042978(Ncald),ENSRNOG00000007596(Rffl),ENSRNOG00000017406(Atrnl1),ENSRNOG00000003258(Cdc73),ENSRNOG00000028630(Ksr2),ENSRNOG00000013281(Mib1),ENSRNOG00000013884(Psd3),ENSRNOG00000026573(Ophn1),ENSRNOG00000000940(Flt1),ENSRNOG00000001662(Dyrk1a),	0.829974	1	1
GO:0051716	cellular response to stimulus	biological_process	18	63	6875	19765	ENSRNOG00000028156(Pld1),ENSRNOG00000008145(Traf3),ENSRNOG00000010771(Pkd1),ENSRNOG00000016878(Lppr5),ENSRNOG00000052814(Ankrd27),ENSRNOG00000017593(Mtr),ENSRNOG00000042978(Ncald),ENSRNOG00000006462(Ero1l),ENSRNOG00000007921(Hnrnpm),ENSRNOG00000007596(Rffl),ENSRNOG00000003258(Cdc73),ENSRNOG00000017406(Atrnl1),ENSRNOG00000028630(Ksr2),ENSRNOG00000013281(Mib1),ENSRNOG00000013884(Psd3),ENSRNOG000000…	0.821403	1	1
GO:0008219	cell death	biological_process	4	63	1582	19765	ENSRNOG00000006462(Ero1l),ENSRNOG00000007596(Rffl),ENSRNOG00000011849(Ndufs1),ENSRNOG00000008145(Traf3),	0.793249	1	1
GO:0023052	signaling	biological_process	15	63	6020	19765	ENSRNOG00000008145(Traf3),ENSRNOG00000028156(Pld1),ENSRNOG00000016878(Lppr5),ENSRNOG00000010771(Pkd1),ENSRNOG00000028630(Ksr2),ENSRNOG00000003258(Cdc73),ENSRNOG00000017406(Atrnl1),ENSRNOG00000013281(Mib1),ENSRNOG00000007596(Rffl),ENSRNOG00000042978(Ncald),ENSRNOG00000006462(Ero1l),ENSRNOG00000000940(Flt1),ENSRNOG00000001662(Dyrk1a),ENSRNOG00000026573(Ophn1),ENSRNOG00000013884(Psd3),	0.78172	1	1
GO:0010033	response to organic substance	biological_process	6	63	2448	19765	ENSRNOG00000006462(Ero1l),ENSRNOG00000007921(Hnrnpm),ENSRNOG00000007596(Rffl),ENSRNOG00000028156(Pld1),ENSRNOG00000003258(Cdc73),ENSRNOG00000000940(Flt1),	0.768946	1	1
GO:0007154	cell communication	biological_process	15	63	6122	19765	ENSRNOG00000026573(Ophn1),ENSRNOG00000000940(Flt1),ENSRNOG00000001662(Dyrk1a),ENSRNOG00000013884(Psd3),ENSRNOG00000013281(Mib1),ENSRNOG00000003258(Cdc73),ENSRNOG00000017406(Atrnl1),ENSRNOG00000028630(Ksr2),ENSRNOG00000042978(Ncald),ENSRNOG00000006462(Ero1l),ENSRNOG00000007596(Rffl),ENSRNOG00000010771(Pkd1),ENSRNOG00000016878(Lppr5),ENSRNOG00000008145(Traf3),ENSRNOG00000028156(Pld1),	0.768695	1	1
GO:0006950	response to stress	biological_process	7	63	2879	19765	ENSRNOG00000010771(Pkd1),ENSRNOG00000001662(Dyrk1a),ENSRNOG00000000940(Flt1),ENSRNOG00000017593(Mtr),ENSRNOG00000006462(Ero1l),ENSRNOG00000028156(Pld1),ENSRNOG00000008145(Traf3),	0.762803	1	1
GO:0009058	biosynthetic process	biological_process	12	63	4987	19765	ENSRNOG00000015389(Stag1),ENSRNOG00000005624(Zfx),ENSRNOG00000036866(Acer3),ENSRNOG00000010771(Pkd1),ENSRNOG00000017593(Mtr),ENSRNOG00000016680(Nsd1),ENSRNOG00000028156(Pld1),ENSRNOG00000008145(Traf3),ENSRNOG00000009935(Xpo1),ENSRNOG00000003258(Cdc73),ENSRNOG00000006248(Trim37),ENSRNOG00000001064(Sbno1),	0.754915	1	1
GO:0016021	integral component of membrane	cellular_component	15	63	6379	19765	ENSRNOG00000060561(Gdpd1),ENSRNOG00000009771(Cdh10),ENSRNOG00000043329(Rnf180),ENSRNOG00000000940(Flt1),ENSRNOG00000055382(Hcn1),ENSRNOG00000008872(Tmem68),ENSRNOG00000017406(Atrnl1),ENSRNOG00000002126(Ncam2),ENSRNOG00000018778(Cadm1),ENSRNOG00000010771(Pkd1),ENSRNOG00000036866(Acer3),ENSRNOG00000013353(Tmem260),ENSRNOG00000016878(Lppr5),ENSRNOG00000008145(Traf3),ENSRNOG00000038436(RGD1307100),	0.737726	1	1
GO:0003677	DNA binding	molecular_function	4	63	1707	19765	ENSRNOG00000016680(Nsd1),ENSRNOG00000005624(Zfx),ENSRNOG00000003041(Smg6),ENSRNOG00000004076(Pms1),	0.735161	1	1
GO:0031224	intrinsic component of membrane	cellular_component	15	63	6440	19765	ENSRNOG00000000940(Flt1),ENSRNOG00000009771(Cdh10),ENSRNOG00000043329(Rnf180),ENSRNOG00000060561(Gdpd1),ENSRNOG00000002126(Ncam2),ENSRNOG00000008872(Tmem68),ENSRNOG00000017406(Atrnl1),ENSRNOG00000055382(Hcn1),ENSRNOG00000013353(Tmem260),ENSRNOG00000016878(Lppr5),ENSRNOG00000010771(Pkd1),ENSRNOG00000036866(Acer3),ENSRNOG00000018778(Cadm1),ENSRNOG00000038436(RGD1307100),ENSRNOG00000008145(Traf3),	0.730738	1	1
GO:0050896	response to stimulus	biological_process	19	63	8172	19765	ENSRNOG00000013884(Psd3),ENSRNOG00000000940(Flt1),ENSRNOG00000001662(Dyrk1a),ENSRNOG00000009935(Xpo1),ENSRNOG00000026573(Ophn1),ENSRNOG00000007596(Rffl),ENSRNOG00000007921(Hnrnpm),ENSRNOG00000042978(Ncald),ENSRNOG00000006462(Ero1l),ENSRNOG00000028630(Ksr2),ENSRNOG00000003258(Cdc73),ENSRNOG00000017406(Atrnl1),ENSRNOG00000013281(Mib1),ENSRNOG00000052814(Ankrd27),ENSRNOG00000016878(Lppr5),ENSRNOG000…	0.729426	1	1
GO:0005576	extracellular region	cellular_component	8	63	3458	19765	ENSRNOG00000010771(Pkd1),ENSRNOG00000009170(Dmxl2),ENSRNOG00000022523(Fkbp5),ENSRNOG00000018778(Cadm1),ENSRNOG00000019776(Sh3gl3),ENSRNOG00000010800(Hadhb),ENSRNOG00000007921(Hnrnpm),ENSRNOG00000042978(Ncald),	0.725807	1	1
GO:0034645	cellular macromolecule biosynthetic process	biological_process	9	63	3998	19765	ENSRNOG00000001064(Sbno1),ENSRNOG00000006248(Trim37),ENSRNOG00000008145(Traf3),ENSRNOG00000003258(Cdc73),ENSRNOG00000016680(Nsd1),ENSRNOG00000009935(Xpo1),ENSRNOG00000010771(Pkd1),ENSRNOG00000015389(Stag1),ENSRNOG00000005624(Zfx),	0.706246	1	1
GO:0007166	cell surface receptor signaling pathway	biological_process	4	63	1893	19765	ENSRNOG00000007596(Rffl),ENSRNOG00000000940(Flt1),ENSRNOG00000013281(Mib1),ENSRNOG00000003258(Cdc73),	0.662927	1	1
