# Supplementary material for: LncRNAs down-regulate Myh1, Casr, and Mis18a expression in the Substantia Nigra of aged male rats
Source: Aging (Albany NY). 2019 Oct 2;11(19):8313–28. doi: 10.18632/aging.102321 (PMC6814601; doi:10.18632/aging.102321)
Supplement: Supplementary Table 18 [file aging-11-102321-s003.xlsx]

## Sheet: Table 18
pathway_3	pathway_3_num	all_diff_gene_list	pathway_2	pathway_2_num	pathway_1	pathway_1_num
Cytokine-cytokine receptor interaction	1	ENSRNOG00000000940(Flt1),	Signaling molecules and interaction	1	Environmental Information Processing	4
PI3K-Akt signaling pathway	1	ENSRNOG00000000940(Flt1),	Signal transduction	4	Environmental Information Processing	4
HIF-1 signaling pathway	1	ENSRNOG00000000940(Flt1),	Signal transduction	4	Environmental Information Processing	4
cAMP signaling pathway	1	ENSRNOG00000028156(Pld1),	Signal transduction	4	Environmental Information Processing	4
Sphingolipid signaling pathway	1	ENSRNOG00000028156(Pld1),	Signal transduction	4	Environmental Information Processing	4
NF-kappa B signaling pathway	1	ENSRNOG00000008145(Traf3),	Signal transduction	4	Environmental Information Processing	4
TNF signaling pathway	1	ENSRNOG00000008145(Traf3),	Signal transduction	4	Environmental Information Processing	4
Rap1 signaling pathway	1	ENSRNOG00000000940(Flt1),	Signal transduction	4	Environmental Information Processing	4
Ras signaling pathway	3	ENSRNOG00000000940(Flt1),ENSRNOG00000028630(Ksr2),ENSRNOG00000028156(Pld1),	Signal transduction	4	Environmental Information Processing	4
Ether lipid metabolism	1	ENSRNOG00000028156(Pld1),	Lipid metabolism	4	Metabolism	7
Sphingolipid metabolism	1	ENSRNOG00000036866(Acer3),	Lipid metabolism	4	Metabolism	7
Glycerophospholipid metabolism	2	ENSRNOG00000028156(Pld1),ENSRNOG00000014856(Etnk1),	Lipid metabolism	4	Metabolism	7
Fatty acid elongation	1	ENSRNOG00000010800(Hadhb),	Lipid metabolism	4	Metabolism	7
Fatty acid degradation	1	ENSRNOG00000010800(Hadhb),	Lipid metabolism	4	Metabolism	7
Selenocompound metabolism	1	ENSRNOG00000017593(Mtr),	Metabolism of other amino acids	1	Metabolism	7
Metabolic pathways	5	ENSRNOG00000017593(Mtr),ENSRNOG00000011849(Ndufs1),ENSRNOG00000010800(Hadhb),ENSRNOG00000028156(Pld1),ENSRNOG00000014856(Etnk1),	Global and overview maps	5	Metabolism	7
Fatty acid metabolism	1	ENSRNOG00000010800(Hadhb),	Global and overview maps	5	Metabolism	7
Biosynthesis of amino acids	1	ENSRNOG00000017593(Mtr),	Global and overview maps	5	Metabolism	7
One carbon pool by folate	1	ENSRNOG00000017593(Mtr),	Metabolism of cofactors and vitamins	1	Metabolism	7
Oxidative phosphorylation	1	ENSRNOG00000011849(Ndufs1),	Energy metabolism	1	Metabolism	7
Cysteine and methionine metabolism	1	ENSRNOG00000017593(Mtr),	Amino acid metabolism	3	Metabolism	7
Lysine degradation	1	ENSRNOG00000016680(Nsd1),	Amino acid metabolism	3	Metabolism	7
Valine, leucine and isoleucine degradation	1	ENSRNOG00000010800(Hadhb),	Amino acid metabolism	3	Metabolism	7
Spliceosome	1	ENSRNOG00000007921(Hnrnpm),	Transcription	1	Genetic Information Processing	5
Ubiquitin mediated proteolysis	1	ENSRNOG00000006248(Trim37),	Folding, sorting and degradation	2	Genetic Information Processing	5
Protein processing in endoplasmic reticulum	1	ENSRNOG00000006462(Ero1l),	Folding, sorting and degradation	2	Genetic Information Processing	5
mRNA surveillance pathway	1	ENSRNOG00000003041(Smg6),	Translation	2	Genetic Information Processing	5
Ribosome biogenesis in eukaryotes	1	ENSRNOG00000009935(Xpo1),	Translation	2	Genetic Information Processing	5
RNA transport	1	ENSRNOG00000009935(Xpo1),	Translation	2	Genetic Information Processing	5
Toll-like receptor signaling pathway	1	ENSRNOG00000008145(Traf3),	Immune system	2	Organismal Systems	5
RIG-I-like receptor signaling pathway	1	ENSRNOG00000008145(Traf3),	Immune system	2	Organismal Systems	5
Fc gamma R-mediated phagocytosis	1	ENSRNOG00000028156(Pld1),	Immune system	2	Organismal Systems	5
Glutamatergic synapse	1	ENSRNOG00000028156(Pld1),	Nervous system	1	Organismal Systems	5
Olfactory transduction	1	ENSRNOG00000042978(Ncald),	Sensory system	1	Organismal Systems	5
GnRH signaling pathway	1	ENSRNOG00000028156(Pld1),	Endocrine system	2	Organismal Systems	5
Estrogen signaling pathway	1	ENSRNOG00000022523(Fkbp5),	Endocrine system	2	Organismal Systems	5
Vasopressin-regulated water reabsorption	1	ENSRNOG00000009700(Dync1i1),	Excretory system	1	Organismal Systems	5
Focal adhesion	1	ENSRNOG00000000940(Flt1),	Cellular community	1	Cellular Processes	6
Endocytosis	4	ENSRNOG00000013884(Psd3),ENSRNOG00000000940(Flt1),ENSRNOG00000019776(Sh3gl3),ENSRNOG00000028156(Pld1),	Transport and catabolism	5	Cellular Processes	6
Phagosome	1	ENSRNOG00000009700(Dync1i1),	Transport and catabolism	5	Cellular Processes	6
Cell cycle	1	ENSRNOG00000015389(Stag1),	Cell growth and death	1	Cellular Processes	6
