# Supplementary material for: LncRNAs down-regulate Myh1, Casr, and Mis18a expression in the Substantia Nigra of aged male rats
Source: Aging (Albany NY). 2019 Oct 2;11(19):8313–28. doi: 10.18632/aging.102321 (PMC6814601; doi:10.18632/aging.102321)
Supplement: Supplementary Table 19 [file aging-11-102321-s015.xlsx]

## Sheet: Table 19 
pathway_ID	PATHWAY_DES	target_gene_in_this_pathway	target_gene_in_all_pathway	all_gene_in_this_pathway	all_gene_in_all_pathway	all_gene_list	rich_factor	Pvalue	Qvalue
rno00450	Selenocompound metabolism	1	22	16	7055	ENSRNOG00000017593(Mtr),	20.0426	1	1
rno00670	One carbon pool by folate	1	22	18	7055	ENSRNOG00000017593(Mtr),	17.8157	1	1
rno00062	Fatty acid elongation	1	22	26	7055	ENSRNOG00000010800(Hadhb),	12.3339	1	1
rno04962	Vasopressin-regulated water reabsorption	1	22	40	7055	ENSRNOG00000009700(Dync1i1),	8.01705	1	1
rno00565	Ether lipid metabolism	1	22	42	7055	ENSRNOG00000028156(Pld1),	7.63528	1	1
rno00270	Cysteine and methionine metabolism	1	22	45	7055	ENSRNOG00000017593(Mtr),	7.12626	1	1
rno00564	Glycerophospholipid metabolism	2	22	92	7055	ENSRNOG00000028156(Pld1),ENSRNOG00000014856(Etnk1),	6.97134	0.00793787	0.238136
rno00071	Fatty acid degradation	1	22	46	7055	ENSRNOG00000010800(Hadhb),	6.97134	1	1
rno00310	Lysine degradation	1	22	47	7055	ENSRNOG00000016680(Nsd1),	6.82302	1	1
rno00600	Sphingolipid metabolism	1	22	48	7055	ENSRNOG00000036866(Acer3),	6.68087	1	1
rno01212	Fatty acid metabolism	1	22	50	7055	ENSRNOG00000010800(Hadhb),	6.41364	1	1
rno00280	Valine, leucine and isoleucine degradation	1	22	52	7055	ENSRNOG00000010800(Hadhb),	6.16696	1	1
rno04622	RIG-I-like receptor signaling pathway	1	22	61	7055	ENSRNOG00000008145(Traf3),	5.25708	1	1
rno05212	Pancreatic cancer	1	22	63	7055	ENSRNOG00000028156(Pld1),	5.09019	1	1
rno04144	Endocytosis	4	22	256	7055	ENSRNOG00000013884(Psd3),ENSRNOG00000000940(Flt1),ENSRNOG00000019776(Sh3gl3),ENSRNOG00000028156(Pld1),	5.01065	0.00445789	0.267473
rno04014	Ras signaling pathway	3	22	220	7055	ENSRNOG00000000940(Flt1),ENSRNOG00000028630(Ksr2),ENSRNOG00000028156(Pld1),	4.37293	0.0146792	0.293584
rno03008	Ribosome biogenesis in eukaryotes	1	22	78	7055	ENSRNOG00000009935(Xpo1),	4.11131	1	1
rno05132	Salmonella infection	1	22	80	7055	ENSRNOG00000009700(Dync1i1),	4.00852	1	1
rno01230	Biosynthesis of amino acids	1	22	80	7055	ENSRNOG00000017593(Mtr),	4.00852	1	1
rno03015	mRNA surveillance pathway	1	22	81	7055	ENSRNOG00000003041(Smg6),	3.95903	1	1
rno05222	Small cell lung cancer	1	22	83	7055	ENSRNOG00000008145(Traf3),	3.86364	1	1
rno04912	GnRH signaling pathway	1	22	84	7055	ENSRNOG00000028156(Pld1),	3.81764	1	1
rno05323	Rheumatoid arthritis	1	22	84	7055	ENSRNOG00000000940(Flt1),	3.81764	1	1
rno04666	Fc gamma R-mediated phagocytosis	1	22	84	7055	ENSRNOG00000028156(Pld1),	3.81764	1	1
rno04064	NF-kappa B signaling pathway	1	22	90	7055	ENSRNOG00000008145(Traf3),	3.56313	1	1
rno04915	Estrogen signaling pathway	1	22	91	7055	ENSRNOG00000022523(Fkbp5),	3.52398	1	1
rno04620	Toll-like receptor signaling pathway	1	22	94	7055	ENSRNOG00000008145(Traf3),	3.41151	1	1
rno05231	Choline metabolism in cancer	1	22	98	7055	ENSRNOG00000028156(Pld1),	3.27226	1	1
rno05169	Epstein-Barr virus infection	2	22	200	7055	ENSRNOG00000009935(Xpo1),ENSRNOG00000008145(Traf3),	3.20682	0.0612907	0.91936
rno04066	HIF-1 signaling pathway	1	22	101	7055	ENSRNOG00000000940(Flt1),	3.17507	1	1
rno04724	Glutamatergic synapse	1	22	103	7055	ENSRNOG00000028156(Pld1),	3.11342	1	1
rno04668	TNF signaling pathway	1	22	107	7055	ENSRNOG00000008145(Traf3),	2.99703	1	1
rno04071	Sphingolipid signaling pathway	1	22	118	7055	ENSRNOG00000028156(Pld1),	2.71764	1	1
rno04110	Cell cycle	1	22	121	7055	ENSRNOG00000015389(Stag1),	2.65026	1	1
rno05160	Hepatitis C	1	22	124	7055	ENSRNOG00000008145(Traf3),	2.58614	1	1
rno04120	Ubiquitin mediated proteolysis	1	22	128	7055	ENSRNOG00000006248(Trim37),	2.50533	1	1
rno03040	Spliceosome	1	22	129	7055	ENSRNOG00000007921(Hnrnpm),	2.48591	1	1
rno00190	Oxidative phosphorylation	1	22	138	7055	ENSRNOG00000011849(Ndufs1),	2.32378	1	1
rno04072	Phospholipase D signaling pathway	1	22	139	7055	ENSRNOG00000028156(Pld1),	2.30706	1	1
rno04514	Cell adhesion molecules (CAMs)	1	22	142	7055	ENSRNOG00000018778(Cadm1),	2.25832	1	1
rno05012	Parkinson's disease	1	22	145	7055	ENSRNOG00000011849(Ndufs1),	2.2116	1	1
rno03013	RNA transport	1	22	150	7055	ENSRNOG00000009935(Xpo1),	2.13788	1	1
rno04932	Non-alcoholic fatty liver disease (NAFLD)	1	22	156	7055	ENSRNOG00000011849(Ndufs1),	2.05565	1	1
rno05202	Transcriptional misregulation in cancer	1	22	157	7055	ENSRNOG00000000940(Flt1),	2.04256	1	1
rno04141	Protein processing in endoplasmic reticulum	1	22	158	7055	ENSRNOG00000006462(Ero1l),	2.02963	1	1
rno04145	Phagosome	1	22	160	7055	ENSRNOG00000009700(Dync1i1),	2.00426	1	1
rno05164	Influenza A	1	22	161	7055	ENSRNOG00000009935(Xpo1),	1.99181	1	1
rno05010	Alzheimer's disease	1	22	172	7055	ENSRNOG00000011849(Ndufs1),	1.86443	1	1
rno04024	cAMP signaling pathway	1	22	183	7055	ENSRNOG00000028156(Pld1),	1.75236	1	1
rno05016	Huntington's disease	1	22	190	7055	ENSRNOG00000011849(Ndufs1),	1.6878	1	1
rno05168	Herpes simplex infection	1	22	191	7055	ENSRNOG00000008145(Traf3),	1.67896	1	1
rno04510	Focal adhesion	1	22	195	7055	ENSRNOG00000000940(Flt1),	1.64452	1	1
rno04015	Rap1 signaling pathway	1	22	202	7055	ENSRNOG00000000940(Flt1),	1.58753	1	1
rno05203	Viral carcinogenesis	1	22	211	7055	ENSRNOG00000008145(Traf3),	1.51982	1	1
rno04060	Cytokine-cytokine receptor interaction	1	22	215	7055	ENSRNOG00000000940(Flt1),	1.49154	1	1
rno01100	Metabolic pathways	5	22	1223	7055	ENSRNOG00000017593(Mtr),ENSRNOG00000011849(Ndufs1),ENSRNOG00000010800(Hadhb),ENSRNOG00000028156(Pld1),ENSRNOG00000014856(Etnk1),	1.31105	0.449286	1
rno05166	HTLV-I infection	1	22	263	7055	ENSRNOG00000009935(Xpo1),	1.21932	1	1
rno04151	PI3K-Akt signaling pathway	1	22	315	7055	ENSRNOG00000000940(Flt1),	1.01804	1	1
rno05200	Pathways in cancer	1	22	380	7055	ENSRNOG00000008145(Traf3),	0.8439	1	1
rno04740	Olfactory transduction	1	22	1172	7055	ENSRNOG00000042978(Ncald),	0.273619	1	1
