# Supplementary material for: LncRNAs down-regulate Myh1, Casr, and Mis18a expression in the Substantia Nigra of aged male rats
Source: Aging (Albany NY). 2019 Oct 2;11(19):8313–28. doi: 10.18632/aging.102321 (PMC6814601; doi:10.18632/aging.102321)
Supplement: Supplementary Table 20 [file aging-11-102321-s021.xlsx]

## Sheet: Table 20 
levels	GO_id	Term	GO_namespace	gene_num	gene_list
2	GO:0044456	synapse part	cellular_component	1	ENSRNOG00000002265,
2	GO:0044699	single-organism process	biological_process	3	ENSRNOG00000021555,ENSRNOG00000049695,ENSRNOG00000002265,
2	GO:0065007	biological regulation	biological_process	2	ENSRNOG00000002265,ENSRNOG00000021555,
2	GO:0005623	cell	cellular_component	3	ENSRNOG00000002265,ENSRNOG00000049695,ENSRNOG00000021555,
2	GO:0040011	locomotion	biological_process	1	ENSRNOG00000002265,
2	GO:0050896	response to stimulus	biological_process	1	ENSRNOG00000002265,
2	GO:0008152	metabolic process	biological_process	3	ENSRNOG00000002265,ENSRNOG00000021555,ENSRNOG00000049695,
2	GO:0043226	organelle	cellular_component	3	ENSRNOG00000002265,ENSRNOG00000049695,ENSRNOG00000021555,
2	GO:0003824	catalytic activity	molecular_function	1	ENSRNOG00000049695,
2	GO:0044464	cell part	cellular_component	3	ENSRNOG00000021555,ENSRNOG00000049695,ENSRNOG00000002265,
2	GO:0007610	behavior	biological_process	1	ENSRNOG00000002265,
2	GO:0032502	developmental process	biological_process	1	ENSRNOG00000002265,
2	GO:0032501	multicellular organismal process	biological_process	2	ENSRNOG00000049695,ENSRNOG00000002265,
2	GO:0045202	synapse	cellular_component	1	ENSRNOG00000002265,
2	GO:0051179	localization	biological_process	2	ENSRNOG00000021555,ENSRNOG00000002265,
2	GO:0050789	regulation of biological process	biological_process	2	ENSRNOG00000002265,ENSRNOG00000021555,
2	GO:0032991	macromolecular complex	cellular_component	1	ENSRNOG00000049695,
2	GO:0048518	positive regulation of biological process	biological_process	2	ENSRNOG00000002265,ENSRNOG00000021555,
2	GO:0004871	signal transducer activity	molecular_function	1	ENSRNOG00000002265,
2	GO:0099080	supramolecular complex	cellular_component	1	ENSRNOG00000049695,
2	GO:0023052	signaling	biological_process	1	ENSRNOG00000002265,
2	GO:0009987	cellular process	biological_process	3	ENSRNOG00000021555,ENSRNOG00000049695,ENSRNOG00000002265,
2	GO:0005488	binding	molecular_function	3	ENSRNOG00000002265,ENSRNOG00000021555,ENSRNOG00000049695,
2	GO:0044425	membrane part	cellular_component	1	ENSRNOG00000002265,
2	GO:0016020	membrane	cellular_component	1	ENSRNOG00000002265,
2	GO:0071840	cellular component organization or biogenesis	biological_process	2	ENSRNOG00000049695,ENSRNOG00000021555,
2	GO:0044422	organelle part	cellular_component	2	ENSRNOG00000021555,ENSRNOG00000049695,
2	GO:0060089	molecular transducer activity	molecular_function	1	ENSRNOG00000002265,
